# Supplementary material for: Transcriptomic and metabolomic profiling of long-lived growth hormone releasing hormone knock-out mice: evidence for altered mitochondrial function and amino acid metabolism
Source: publisher site journal article supplement (doi:10.18632/aging.102822), 2020-02-23
Supplement: Supplementary file [file aging-v12i4-102822-supplementary-material-SD1.pdf]

**SUPPLEMENTARY FIGURES**

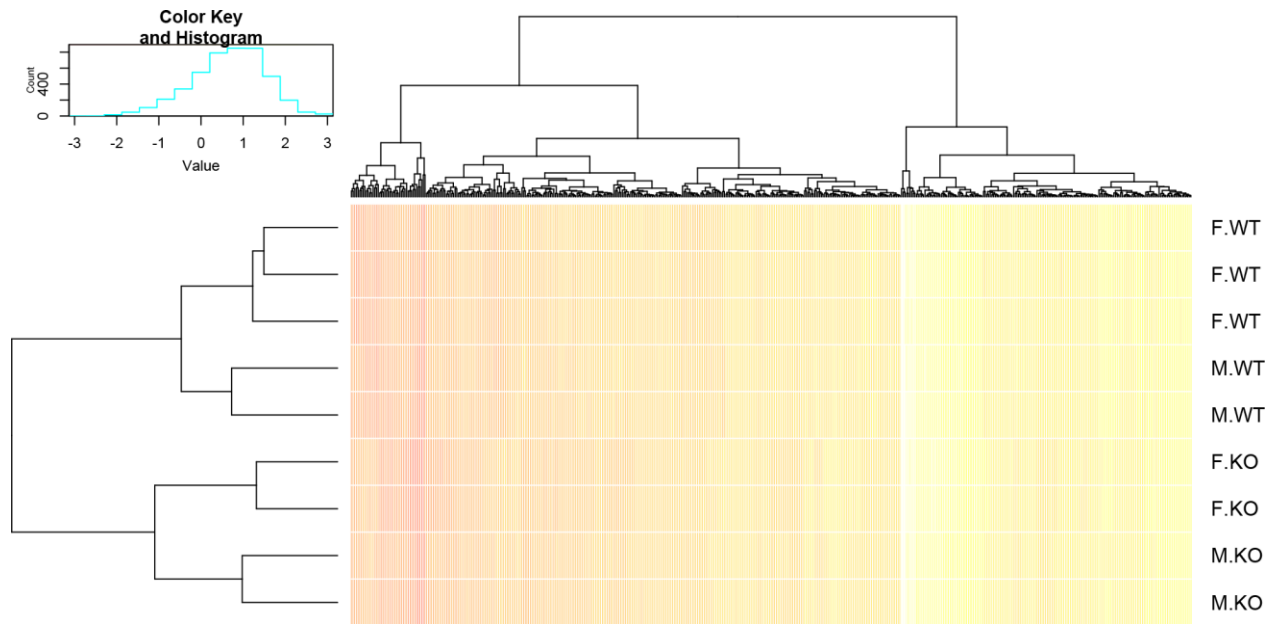

**Supplementary Figure 1. Heatmap of transcripts associated with genotype.**

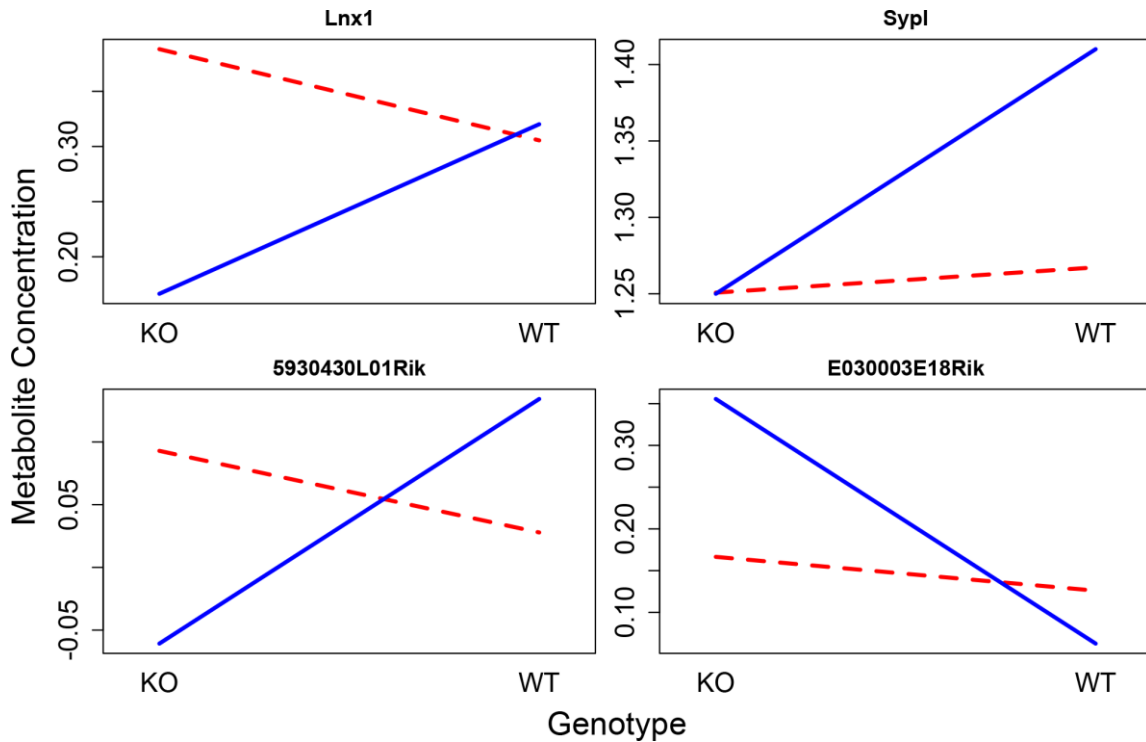

**Supplementary Figure 2. Individual transcripts with genotype by sex interactions.** Blue, solid lines indicate males while red, dotted lines indicate mean female values.
