# Supplementary material for: Transcriptomic and metabolomic profiling of long-lived growth hormone releasing hormone knock-out mice: evidence for altered mitochondrial function and amino acid metabolism
Source: publisher site journal article supplement (doi:10.18632/aging.102822), 2020-02-23
Supplement: Supplementary file [file aging-v12i4-102822-supplementary-material-SD2.pdf]

## SUPPLEMENTARY TABLES

**Supplementary Table 1. Mouse demographic information.**

| Mouse ID | Genotype | Sex | Weight | Transcriptomics | Metabolomic |
|----------|----------|-----|--------|-----------------|-------------|
| 10722    | Null     | M   | 14.01  | x               | x           |
| 10723    | Null     | M   | 13.46  | x               | x           |
| 10724    | Null     | M   | 13.4   |                 | x           |
| 10727    | WT       | M   | 26.22  | x               | x           |
| 10728    | WT       | M   | 27.34  |                 | x           |
| 10729    | WT       | M   | 25.99  | x               | x           |
| 10713    | WT       | F   | 27.63  | x               | x           |
| 10714    | WT       | F   | 27.03  | x               | x           |
| 10715    | WT       | F   | 26.44  | x               | x           |
| 10717    | Null     | F   | 12.07  | x               | x           |
| 10718    | Null     | F   | 13.96  |                 | x           |
| 10720    | Null     | F   | 12.31  | x               | x           |

Please browse Full Text version to see the data of Supplementary Tables 2–8

**Supplementary Table 2. FPKM transcriptomic data.**

**Supplementary Table 3. Raw positive ion mode metabolomics data.**

**Supplementary Table 4. Raw negative ion mode metabolomics data.**

**Supplementary Table 5. RNAseq linear model pvalues.**

**Supplementary Table 6. Gene ontology pathways up or down regulated in GHRH-KO mice.** Note GHRH-KO mice have elevated gene transcript abundances of mitochondria and amino acid metabolism genes.

**Supplementary Table 7. Positive ionization mode metabolite linear model pvalues.**

**Supplementary Table 8. Negative ionization mode metabolite linear model pvalues.**

**Supplementary Table 9. Significantly enriched metabolic pathways in blood serum.**

| <b>Variable-Ionization mode</b> | <b>Pathway</b>                                  | <b>Significantly different metabolites</b> | <b>Metabolites in pathway</b> | <b>Adjusted p-value</b> |
|---------------------------------|-------------------------------------------------|--------------------------------------------|-------------------------------|-------------------------|
| Genotype-Positive               | Nicotine degradation III                        | 4                                          | 8                             | 0.014                   |
|                                 | Serotonin degradation                           | 3                                          | 5                             | 0.018                   |
|                                 | Ceramide biosynthesis                           | 2                                          | 2                             | 0.027                   |
|                                 | Mineralocorticoid biosynthesis                  | 2                                          | 2                             | 0.027                   |
|                                 | Glutathione redox reactions I                   | 2                                          | 2                             | 0.027                   |
|                                 | Glutathione redox reactions II                  | 2                                          | 2                             | 0.027                   |
|                                 | Nicotine degradation IV                         | 3                                          | 7                             | 0.042                   |
| Sex-Positive                    | CMP- <i>N</i> -acetylneuraminate biosynthesis I | 2                                          | 3                             | 0.007                   |
|                                 | Serotonin degradation                           | 2                                          | 4                             | 0.009                   |

Differentially regulated metabolic pathways for genotype and sex were identified by the program mummichog. Enriched pathways were only discovered in the positive ionization mode.
