# Supplementary material for: Transcriptomic and metabolomic profiling of long-lived growth hormone releasing hormone knock-out mice: evidence for altered mitochondrial function and amino acid metabolism
Source: Aging (Albany NY). 2020 Feb 23;12(4):3473–85. doi: 10.18632/aging.102822 (PMC7066919; doi:10.18632/aging.102822)
Supplement: Supplementary Table 2 [file aging-12-102822-s008..xlsx]

## Sheet: Table S2- Raw transcriptome
Transcript	KO_F_10717_509	KO_F_10720_509	KO_M_10722_511	KO_M_10723_511	WT_F_10713_508	WT_F_10714_508	WT_F_10715_508	WT_M_10727_513	WT_M_10729_513
Oprk1	0	0	0	0	0	0	0	0	0
Npbwr1	0	0	0.0199483	0.0116285	0	0	0.0108647	0	0.00997702
Fam150a	0	0	0.0507581	0	0	0	0	0	0
Sntg1	0	0.00602932	0	0	0.0117136	0	0	0.00524185	0
Snord87	0	0	0	0	0	0	0	0	0
Ppp1r42	0	0	0	0	0.0404619	0	0.156303	0	0
Cpa6	0	0	0	0	0.0224969	0	0	0	0
Mir467e	0	0	0	0	0	0	0	0	0
Mir6341	0	0	0	0	0	0	0	0	0
Prdm14	0	0	0	0	0	0.0179434	0.0157947	0.0147622	0
Xkr9	0	0	0	0	0	0	0	0	0
Trpa1	0	0	0	0	0	0	0	0	0
Kcnb2	0	0	0	0	0	0	0.0223362	0	0
Crisp4	0	0	0	0	0	0	0	0	0
Defb44-ps	0	0	0	0	0	0	0	0	0
Defb18	0	0	0	0	0	0	0	0	0
Defb41	0	0	0	0	0	0	0	0	0
Gm15386	0	0	0	0	0	0	0	0	0
Tfap2d	0	0	0	0	0	0	0	0	0
Tfap2b	0	0.0207059	0.00959585	0.0111871	0.186599	0.118639	0.0128215	0.00977176	0.00959961
Pkhd1	0	0	0	0	0	0	0	0	0
4930486I03Rik	0	0	0	0	0	0	0	0	0
Linc-md1	0	0.114955	0	0	0	0	0	0	0
Mir133b	0	0	0	0	0	0	0	0	0
Mir206	0	0	0	0	0	0	0	0	0
Il17a	0	0	0	0	0	0	0	0	0
Il17f	0	0	0	0	0	0	0	0	0
6720483E21Rik	0	0.0430339	0	0	0	0	0	0	0
Khdc1a	0	0	0	0	0	0	0	0	0
Khdc1c	0	0	0	0	0	0	0	0	0
Khdc1b	0	0	0	0	0	0	0	0	0
Rims1	0	0	0	0	0	0	0	0	0
Mir30a	0	0	0	0	0	0	0	0	0
Mir30c-2	0	0	0	0	0	0	0	0	0
Adgrb3	0	0	0	0	0	0	0	0.0066851	0
4931408C20Rik	0	0	0	0	0	0	0	0	0
Gm597	0	0	0	0	0	0	0	0	0
Mir6342	0	0	0	0	0	0	0	0	0
4931428L18Rik	0	0	0	0	0	0	0	0.0386797	0
Lgsn	0	0	0	0	0	0	0	0	0.0605727
Pih1d3	0	0	0	0	0	0	0	0	0
Gm4850	0	0	0.0469635	0	0	0	0	0	0
Khdrbs2	0	0	0	0	0	0	0	0	0
Gm9839	0	0	0	0	0	0	0	0	0
Gm5415	0	0	0	0	0.0111582	0.0121507	0	0	0
Mir6896	0	0	0	0	0	0	0	0	0
Mir5103	0	0	0	0	0	0	0	0	0
Prss39	0	0	0	0	0	0	0	0	0
Cfc1	0	0	0	0	0	0	0	0	0
Prss40	0	0	0	0	0	0	0	0	0
Amer3	0	0	0	0	0	0	0	0	0
AA619741	0	0	0	0	0	0	0	0	0
Mir6897	0	0	0	0	0	0	0	0	0
Mir6898	0	0	0	0	0	0	0	0	0
Lyg2	0	0	0	0	0	0	0	0	0
Lyg1	0	0	0	0	0	0	0	0	0
Nms	0	0	0	0	0	0	0	0	0
Mir6349	0	0	0	0	0	0	0	0	0
Snord89	0	0	0	0	0	0	0	0	42.1813
Rfx8	0	0.0224233	0	0.0223703	0	0.0475172	0.0418315	0.0195427	0.0191291
Gm3646	0	0	0.180878	0.214437	0	0	0	0	0
1700066B17Rik	0	0	0	0	0	0	0	0	0
Gm16894	0	0	0	0	0	0	0	0.0519245	0
4930448I06Rik	0	0	0	0	0	0	0	0	0
Pantr1	0	0	0	0	0	0	0	0	0
Pou3f3	0	0	0	0	0	0	0.0264464	0	0.0121312
Pantr2	0	0	0	0	0	0	0	0	0
Dalir	0	0	0	0	0	0	0	0.017838	0
Gpr45	0	0.0111431	0	0	0	0	0	0	0
4930521E06Rik	0	0	0	0	0	0	0.0520486	0	0
Stk-ps2	0	0	0	0	0	0	0	0	0
Mir6350	0	0	0	0	0	0	0	0	0
9330175M20Rik	0	0.0172431	0.0147375	0	0	0.0182522	0.0482	0.0450486	0
1700019A02Rik	0	0	0	0	0	0	0	0	0
Mir7681	0	0	0	0	0	0	0	0	0
Ccdc150	0	0.0113052	0	0.011261	0.0219552	0.0239072	0	0.0295091	0.00966281
Boll	0	0	0.12171	0	0	0.050439	0	0	0
9130227L01Rik	0	0.0236324	0	0	0	0	0	0	0
1700003I22Rik	0	0	0	0	0	0	0	0	0
Hsfy2	0	0	0	0	0	0	0	0	0
BC055402	0	0	0	0	0	0	0	0	0.0336196
4930558J18Rik	0	0	0	0.0870108	0.0423292	0	0	0	0
Aox4	0	0	0.00731829	0	0	0	0	0	0
Aox2	0	0.0178613	0.00762936	0	0	0.00943868	0	0	0
Als2cr11	0	0	0	0	0	0	0	0	0.0178606
Snord70	0	0	0	0	0	0	0	0	0
Snord11	0	0	0	0	0	0	0	0	0
Icos	0	0.0266464	2.56155	0.0132748	0.051744	0.0281853	0.0248085	0.0463828	0.0113837
Snora41	0	0	0	0	0	0	0	0	0
Dytn	0	0	0	0	0	0	0	0	0
4933402D24Rik	0	0.0258571	0.0221105	0.0516164	0	0	0	0	0.0220453
Gm13749	0	0.0324568	0	0	0	0.103362	0	0.0566601	0.0276408
Mir1958	0	0	0	0	0	0	0	0	0
Mir6899	0	0	0	0	0	0	0	0	0
2810408I11Rik	0	0	0.577679	0	0.0724843	0	0	0	0
Akr1cl	0	0	0.651428	0	0.167867	0.808617	0.0970944	0	0
Cryge	0	0	0	0	0.0831789	0	0	0	0
Crygd	0	0	0	0	0	0	0	0	0
Crygc	0	0	0	0	0	0	0	0	0
Crygb	0	0	0	0	0	0	0	0	0
Cryga	0	0	0	0	0	0	0	0	0
Pth2r	0	0	0	0.0364924	0	0	0	0	0
Crygf	0	0	0	0	0	0	0	0	0
Cps1	0	0	0	0	0	0	0	0	0
Spag16	0	0	0	0	0	0	0	0	0
Vwc2l	0	0	0	0	0	0	0	0	0
Abca12	0	0	0	0	0	0	0	0.00438874	0
Apol7d	0	0	0	0	0	0	0	0	0
Gm8883	0	0.0768087	0	0	0	0	0	0	0
4933417E11Rik	0	0	0	0	0	0	0.0414918	0	0
Tmem169	0	0	0	0	0.0150805	0	0	0	0.0265341
Ankar	0	0	0	0.00930265	0	0	0	0.00812558	0
Tnp1	0	0	0	0	0	0	0	0	0
1700027A15Rik	0	0	0	0	0	0	0	0	0
Pinc	0	0	0	0	0.0286066	0.0312807	0	0	0
D530049I02Rik	0	0	0	0	0	0	0	0	0
6030407O03Rik	0	0	0.0215023	0	0	0.0266579	0	0	0
Mir6351	0	0	0	0	0	0	0	0	0
Cxcr1	0	0.0428549	0	0.0428753	0.0415555	0	0	0	0.0728618
Mir1928	0	0	0	0	0	0	0	0	0
Mir26b	0	0	0	0	0	0	0	0	0
Wnt10a	0	0	0.803061	0	0.111172	0.0728281	0.0213715	0	0
Cdk5r2	0	0.0648472	0	0	0.0157387	0	0	0	0
Cryba2	0	0	0	0	0	0	0	0	0
Mir375	0	0	0	0	0	0	0	0	0
Ccdc108	0	0.00741632	0	0	0	0	0	0	0
A630095N17Rik	0	0	0	0.085416	0	0	0	0.0746761	0
Resp18	0	0	0	0	0	0	0	0	0
Asic4	0	0	0.0141563	0	0.0321602	0	0	0.0144231	0.0141446
Gm17751	0	0	0	0	0	0	0	0	0
Mir6343	0	0	0	0	0	0	0	0	0
Mir6352	0	0	0	0	0	0	0	0	0
Scg2	0	0	0	0	0	0	0	0	0
1700016L21Rik	0	0	0	0	0	0	0	0	0
Nyap2	0	0	0	0	0	0	0	0	0
Mir6344	0	0	0	0	0	0	0	0	0
Slc19a3	0	0.0146548	0.0626176	0	0.0142281	0.015505	0	0.0127573	0
Ccl20	0	0	0	0	0	0	0	0.0566522	0
Daw1	0	0	0	0	0	0	0	0	0
Sphkap	0	0	0.0110853	0	0	0	0	0.00564174	0.0166525
Mir6353	0	0	0	0	0	0	0	0	0
Dner	0	0.118754	0.0304402	0.0236599	0	0.0125579	0.0110531	0	0.0304476
Mir5126	0	0	0	0	0	0	0	0	0
Slc16a14	0	0	0	0	0	0.0399057	0	0	0.0160855
Mir8096	0	0	0	0	0	0	0	0	0
9930111H07Rik	0	0.062577	0	0.0627796	0.060627	0.0668037	0.0588552	0	0.0530174
4933407L21Rik	0	0	0	0	0.0405452	0	0	0	0
Gpr55	0	0.0172575	0.412996	0	0	0	0	0	0
Spata3	0	0	0	0	0.0847484	0.0752435	0	0	0.0393938
B3gnt7	0	0	0.0723836	0.0168853	0.279538	0	0.0315633	0.0147501	0.0433904
Snora75	0	0	0	0	0	0	0	0	0
Gm24148	0	0	0	0	0	0	0	0	0
Snord82	0	0	0	0	0	0	0	0	0
C130036L24Rik	0	0.0373398	0.1278	0.0746576	0.0724327	0.0396736	0.104809	0.358778	0.0953176
Nmur1	0	0.039038	0	0	0	0	0	0	0
1700019O17Rik	0	0	0	0	0	0	0	0	0
Alppl2	0	0	0	0	0	0	0	0	0
Alpi	0	0	0	0	0	0	0	0	0
Akp3	0	0	0.0232196	0	0	0	0	0	0
Ecel1	0	0	0	0	0.0442906	0	0.0141633	0	0
Prss56	0	0	0	0	0	0	0	0	0
Chrng	0	0.0234308	0	0.0233786	0	0.0496613	0	0	0
Kcnj13	0	0.069455	0.237683	0.0694093	0.067373	0.0737601	0.129899	0.151612	0.059126
3110079O15Rik	0	0	0	0	0.132874	0	0	0	0
Scarna6	0	0	0	0	0.442358	0	0	0	0
Mroh2a	0	0.00561362	2.39e-168	0	0	0	0	0	0
Trpm8	0	0	0	0	0	0	0	0.00973734	0.00956588
Spp2	0	0	0	0	0	0	0	0	0
Glrp1	0	0	0.0392611	0.022908	0.022284	0.0486607	0	0.0200126	0
Platr5	0	0	0	0	0	0	0.125422	0.116479	0
1700067G17Rik	0	0	0	0	0	0	0	0	0
C030007H22Rik	0	0	0	0	0	0	0	0	0
4933400F21Rik	0	0	0	0	0	0	0	0	0
Iqca	0	0.0135199	0	0	0	0	0	0	0
Prlh	0	0	0	0	0	0	0	0	0
Rbm44	0	0	0	0.0111265	0.0108467	0	0	0	0.00954776
1700020N18Rik	0	0	0.184144	0	0	0	0.101746	0	0
Mir6900	0	0	0	0	0	0	0	0	0
Olfr1416	0	0	0	0	0	0	0	0	0
Olfr1415	0	0	0	0	0	0	0	0	0
Olfr1414	0	0	0	0	0	0	0	0	0
Olfr1413	0	0	0	0	0	0	0	0	0
Olfr1412	0	0	0	0	0	0	0	0	0
Olfr1411	0	0	0	0	0	0	0	0	0
Olfr1410	0	0	0	0	0	0	0	0	0
Olfr12	0	0	0	0	0	0	0	0	0
Otos	0	0	0.130516	0	0.0736852	0	0	0	0
Mir149	0	0	0	0	0	0	0	0	0
9430060I03Rik	0	0	0.0700285	0	0.0794595	0.115791	0.0764591	0.0476138	0.116332
Aqp12	0	0	0	0	0	0	0	0	0
Agxt	0	0	0	0	0	0	0	0	0
2310007B03Rik	0	0	0	0	0	0	0.0179899	0	0
Mir6901	0	0	0	0	0	0	0	0	0
Mir6902	0	0	0	0	0	0	0	0	0
Mir6345	0	0	0	0	0	0	0	0	0
Ano7	0	0	0.00941839	0	0.0103744	0	0	0	0
Gal3st2	0	0	1.16781	0	0	0	0	0	0.0131142
Gm9994	0	0.040298	0.620766	0	0	0	0	0	0.0342723
Neu4	0	0	0	0	0	0	0	0	0
Pdcd1	0	0	0.817165	0	0	0	0.0434962	0	0.0397674
4930440C22Rik	0	0	0	0	0	0	0	0	0
4930598F16Rik	0	0	0	0	0	0	0	0	0
1700063A18Rik	0	0	0	0	0	0	0	0	0
4930533P14Rik	0	0	0	0	0	0	0	0	0
Slco4c1	0	0	0	0	0	0	0	0	0.0157622
Slco6b1	0	0	0	0	0	0	0	0	0
Slco6c1	0	0	0	0	0	0	0	0	0
Slco6d1	0	0	0	0	0	0	0	0	0
Cntnap5b	0	0	0	0	0	0	0	0	0
Gm20268	0	0	0	0	0	0	0	0	0
Mir3473f	0	0	0	5.47861	0	11.8656	5.35874	0	12.7181
Serpinb5	0	0	0	0	0.499458	0.163378	0.0159794	0	0
Serpinb12	0	0	0	0	0	0	0.0264139	0	0
Serpinb13	0	0	0	0	0	0	0	0	0
Serpinb3a	0	0	0	0	0	0	0	0	0
Serpinb3d	0	0	0	0	0	0	0	0	0
Serpinb3b	0	0	0	0	0	0	0	0	0
Serpinb3c	0	0	0	0	0	0	0	0	0
Serpinb11	0	0.0804491	0	0	0.0780648	0	0	0	0
Serpinb7	0	0	0	0	0	0	0	0	0
Serpinb2	0	0	0.0194475	0	0	0	0.0212184	0	0
Serpinb10	0	0.039219	0.0529006	0	0.0126917	0.0138258	0	0.0113762	0.0223401
D830032E09Rik	0	0	0	0	0	0	0	0	0
Cdh7	0	0	0	0	0	0	0	0	0
Cntnap5a	0	0	0	0	0	0	0	0	0
2900060B14Rik	0	0	0	0	0.0917597	0.101869	0	0	0
Mir6346	0	0	0	0	0	0	0	0	0
3830432H09Rik	0	0	0	0	0.0355286	0	0	0	0
C1ql2	0	0	0.306729	0	0	0	0	0	0.0191291
Marco	0	0	48.5727	0.0451099	0.0219419	0.023955	0.0421774	0.0394082	0.115716
Celrr	0	0	0	0	0	0	0	0	0
Htr5b	0	0	0	0	0	0	0	0	0
Dpp10	0	0	0.126061	0.0091838	0	0	0	0	0
Gpr39	0	0	0	0	0	0.0345189	0	0.0141999	0
Tmem163	0	0	0.284179	0	0	0	0	0	0.0149412
Mir128-1	0	0	0	0	0	0	0	0	0
Lct	0	0	0	0	0.00666533	0	0	0	0.0117407
Thsd7b	0	0	0.0115569	0.0134683	0.00657015	0	0.0188694	0.0352914	0.0173598
Zp3r	0	0	0.0188219	0	0	0	0	0	0
C4bp	0	0	0	0	0	0	0	0	0.0408493
Fcamr	0	0	0.267509	0	0	0.0276383	0	0	0.0444497
Il24	0	0	0	0	0	0	0	0	0
Il20	0	0	0	0	0	0	0	0	0
Il19	0	0	0	0	0	0	0	0	0
Il10	0	0	0.18498	0	0	0	0.101115	0	0
Avpr1b	0	0	0	0	0	0	0	0	0
Ctse	0	0.0420973	0.395866	0.0419896	1.59354	0.891853	0.0588838	0.0183408	0.089803
Slc26a9	0	0	0	0	0	0.0125289	0	0	0
Mir135b	0	0	0	0	0	0	0	0	0
Gm10538	0	0	0	0	0	0	0	0	0
Gm19461	0	0.0558766	0	0.0139197	0	0.0147777	0	0.0121591	0.0119343
Golt1a	0	0	0	0	0	0	0	0	0
Kiss1	0	0	0	0	0	0	0	0	0
Ren2	0	0	0	0	0	0	0	4.09e-05	0
Ren1	0	0	0	0	0	0	0	0.0285119	0
Mir6903	0	0	0	0	0	0	0	0	0
Chit1	0	0	0	0	0	0	0	0	0.0247677
4933406M09Rik	0	0	0	0	0	0	0	0	0
Mgat4e	0	0	0	0	0	0	0	0	0
Syt2	0	0.0127817	0	0	0	0.0135185	0	0.0111235	0
Mir1231	0	0	0	0	0	0	0	0	0
Lad1	0	0	1.7048	0.0145113	0.862398	0.369747	0.0542428	0.0380277	0.0248783
Ascl5	0	0	0	0	0	0	0	0	0
Gm15850	0	0	0	0	0	0	0	0	0
5730559C18Rik	0	0	0.012352	0.0144041	0.0701679	0.0305846	0.0134605	0	0
Gpr25	0	0	0.0195978	0	0	0	0	0	0
Kif14	0	0	0.0559563	0.0200621	0.00978983	0	0.00936806	0.00438069	0.0129363
Platr22	0	0	0	0	0	0	0	0	0
Mir181a-1	0	0	0	0	0	0	0	0	0
Mir181b-1	0	0	0	0	0	0	0	0	0
Atp6v1g3	0	0	0.0612856	0	0	0	0	0	0
Gm5833	0	0	0	0	0	0	0	0	0
Lhx9	0	0	0	0	0	0	0.0087329	0.0163318	0.0321081
4930596I21Rik	0	0	0	0	0	0	0	0	0
Crb1	0	0	0	0	0	0	0	0	0
4933436E23Rik	0	0	0	0	0	0	0	0	0
F13b	0	0	0	0	0	0	0.0173334	0	0
Cfhr1	0	0.0262525	0.0448982	0	0	0	0	0.0457863	0.0447619
Cfhr2	0	0.0858705	0.514077	0.142902	0.305503	0.273268	0.400996	0.0499394	0.439062
Kcnt2	0	0.0217165	0.0278314	0.064891	0.0527193	0.0688805	0.0505211	0.0472344	0.0835338
4930590L20Rik	0	0	0	0	0	0	0	0	0
Rgs13	0	0	0.0264095	0	0.0599107	0.032766	0.02885	0	0
Rgs21	0	0	0	0	0	0	0	0	0
Brinp3	0	0	0	0	0.107796	0.100717	0.0147749	0	0
Mir7652	0	0	0	0	0	0	0	0	0
Ptgs2os2	0	0	0.0667932	0	0	0	0	0	0
Pdc	0	0	0	0	0	0	0	0	0
2310030A07Rik	0	0	0	0	0	0	0	0	0
C730036E19Rik	0	0.0166306	0.0142135	0.0331557	0.0484348	0.0176019	0.015494	0.0144815	0.0142015
Mir7682	0	0	0	0	0	0	0	0	0
Apobec4	0	0	0	0	0	0	0	0	0
Shcbp1l	0	0.0218873	0.0187117	0	0	0	0	0	0
Rgs8	0	0	0.00623854	0	0	0.00771639	0	0.00635056	0
C230024C17Rik	0	0	0	0	0	0	0	0	0
Teddm1a	0	0	0	0	0	0	0	0	0.0560277
Zfp648	0	0	0	0	0	0	0	0	0
4930532M18Rik	0	0	0	0	0	0	0	0	0
Cacna1e	0	0	0.0757935	0	0.00319289	0	0.006108	0	0.0084401
Lhx4	0	0	0	0	0	0	0	0	0
Fam163a	0	0	0	0	0.0107275	0.0116806	0.0102807	0	0
Tdrd5	0	0	0.0353661	0.0137455	0	0	0.0128446	0	0
Nphs2	0	0	0.0119533	0.0139386	0	0.0147978	0	0.0121756	0
Tex35	0	0	0	0	0	0	0	0	0
Mir488	0	0	0	0	0	0	0	0	0
Scarna3a	0	0	0	0	0	0	0	0	0
Mir1843b	0	0	0	0	0	0	0	0	0
Tnr	0	0	0.0067264	0	0	0	0	0	0
Mir1927	0	0	0	0	0	0	0	0	0
Snord47	0	0	0	0	0	0	0	0	0
Ankrd45	0	0	0	0	0	0.0122362	0	0	0.00989033
4930469G21Rik	0	0	0	0	0	0.0554672	0	0	0
Tnfsf4	0	0	0.0487224	0	0	0	0	0	0
Fasl	0	0	0.265416	0	0.0231656	0	0.0222734	0	0.0203586
4930558K02Rik	0	0	0	0	0	0	0	0	0
Mir199a-2	0	0	0	0	0	0	0	0	0
Mir214	0	0	0	0	0	0	0	0	0
7420461P10Rik	0	0	0	0	0	0	0	0	0
Fmo6	0	0.0723919	0	0.0240792	0.0234182	0	0	0.0210361	0.0205795
Fmo3	0	0	0	0	0	0	0	0	0
Mroh9	0	0	0	0	0	0	0	0	0
Mettl11b	0	0	0.118839	0	0	0	0	0	0
Xcl1	0	0	4.27875	0	0.234607	0.262072	0	0.214792	0.101822
4930568G15Rik	0	0	0	0	0	0	0	0	0
Tbx19	0	0	0.0140883	0	0	0	0	0	0
Gpa33	0	0	0.0495934	0	0.0375448	0	0	0	0
Mael	0	0.0595644	0	0	0	0	0	0.025985	0
Gm4846	0	0	0	0	0	0	0	0	0
Gm4847	0	0	0	0	0	0	0	0	0
Fmo9	0	0	0	0	0	0	0	0	0
Gm16701	0	0	0	0	0.0516332	0.0567711	0	0.0466455	0.0452059
Mir6347	0	0	0	0	0	0	0	0	0
Mir6348	0	0	0	0	0	0	0	0	0
1700084C01Rik	0	0	0.11036	0	0	0	0	0	0
Sh2d1b2	0	0	0	0	0	0	0	0	0
1700015E13Rik	0	0	0	0	0	0	0	0.0657594	0
Fcrlb	0	0	0.0943082	0	0	0	0	0	0.0625315
Mir6546	0	0	0	0	0	0	0	0	0
Nr1i3	0	0	0	0.0359532	0	0	0	0	0
Itln1	0	0	0	0	0	0	0	0	0
Mir7683	0	0	0	0	0	0	0	0	0
Slamf6	0	0.0180673	2.33184	0.0540408	0	0.0191276	0	0.0157359	0.0462736
Nhlh1	0	0.0177253	0	0.0353435	0	0	0	0.0154372	0
Kcnj9	0	0	0	0	0.0128736	0	0.0123442	0	0.0113289
Vsig8	0	0.0303513	0	0	0.0883441	0.0533159	0	0	0
Crp	0	0	0.0458939	0.0267867	0.0781156	0	0	0.0234021	0.0686228
Apcs	0	0	0	0	0	0	0	0	0
Olfr16	0	0	0	0	0	0	0	0	0
Olfr1408	0	0.0534796	0	0	0	0	0	0	0
Olfr1406	0	0	0	0	0	0	0	0	0
Olfr218	0	0	0	0	0	0	0	0	0
Olfr1404	0	0	0	0	0	0	0	0	0
Fcer1a	0	0.0477191	0.24513	0.143323	0.185049	0.304802	0.0447433	0	0.283725
Olfr418	0	0	0	0	0	0	0	0	0
Mptx2	0	0	0	0	0	0	0	0	0
Pydc4	0	0	0.790735	0	0.0162154	0	0	0	0
Ifi202b	0	0	0	0	0	0	0	0	0
Olfr433	0	0	0.0419262	0	0	0	0	0	0.0831662
Olfr432	0	0	0	0	0	0	0	0	0
Olfr430	0	0	0	0	0	0	0	0	0
Olfr429	0	0	0	0	0	0	0	0	0
Olfr427	0	0	0	0	0	0	0	0	0
Olfr426	0	0	0	0	0	0	0	0	0
Olfr231	0	0	0	0	0	0	0	0	0
Olfr424	0	0	0	0	0	0	0	0	0
Olfr421-ps1	0	0	0	0	0	0	0	0	0
Olfr420	0	0	0	0	0	0	0	0	0
Olfr419	0	0	0	0	0	0	0	0	0
Mptx1	0	0	0	0	0	0	0	0	0
Olfr417	0	0	0	0	0	0	0	0	0
Olfr248	0	0	0	0	0	0	0	0	0
Olfr414	0	0	0	0	0	0	0	0	0
Olfr220	0	0	0	0	0	0	0	0	0
Wdr64	0	0	0	0	0.0109506	0	0.0104951	0	0
Exo1	0	0.00771056	0.105386	0	0.0299533	0	0.014341	0.00670514	0.00659448
Becn2	0	0	0.0216612	0	0	0	0	0	0
Mir350	0	0	0	0	0	0	0	0	0
2310043L19Rik	0	0	0	0	0	0	0	0.0676233	0
1700016C15Rik	0	0.210781	0.0602304	0.0705638	0.204144	0.225344	0.132374	0.0616792	0
Gm16432	0	0.0823794	0	0	0.0266452	0	0.0769203	0	0.070216
Kif26b	0	0	0.0242917	0.00566137	0	0.00600797	0	0	0.0340648
Mir6904	0	0	0	0	0	0	0	0	0
Mixl1	0	0	0	0	0	0	0	0	0
9130409I23Rik	0	0	0	0	0	0	0	0	0
Cnih3	0	0.0328565	0	0	0	0	0.0162416	0.0151795	0
Ccdc121	0	0	0	0	0	0	0	0.0216862	0
Vmn1r1	0	0	0	0	0	0	0	0	0
Capn8	0	0	0	0	0.103419	0.0375936	0	0	0
Ccdc185	0	0	0	0	0	0	0	0	0
Hhipl2	0	0	0	0.0171665	0.351364	0.0729152	0	0	0
1700112H15Rik	0	0	0	0.0672074	0	0	0	0	0
4930488B22Rik	0	0	0	0	0	0	0	0	0
Mir1981	0	0	0	0	0	0	0	0	0
Snora36b	0	0	0	0	0	0	0	0	0
Mir664	0	0	0	0	0	0	0	0	0
Mir194-1	0	0	0	0	0	0	0	0	0
Mir215	0	0	0	0	0	0	0	0	0
Gm2061	0	0	0	0	0	0	0	0	0
Slc30a10	0	0	0	0	0	0	0	0	0
5033404E19Rik	0	0	0	0	0	0	0	0	0
Mir297c	0	0	0	0	0	0	0	0	0
A730004F24Rik	0	0	0	0	0	0	0	0	0
D1Pas1	0	0	0	0	0	0	0	0	0
1700007P06Rik	0	0.187163	0	0	0	0	0	0.0547024	0
9330162B11Rik	0	0	0	0	0	0	0	0.017515	0
Ush2a	0	0	0	0	0	0	0	0	0
Spata45	0	0	0.133675	0.315482	0	0	0	0.138013	0.129445
Fam71a	0	0	0	0	0	0	0	0	0
Mir3473c	0	0	0	0	0	0	0	0	0
1700065J18Rik	0	0	0	0	0	0	0	0	0
Mir205	0	0	0	0	0	0	0	0	0
4930503O07Rik	0	0	0	0	0	0	0	0	0
Mir29b-2	0	0	0	0	0	0	0	0	0
Mir29c	0	0.000124984	0	0	0	0	0	0	45.4248
B020014A21Rik	0	0.0696192	0	0	0	0	0	0	0.0395889
H60c	0	0	0.0132649	0	0	0	0	0.0135136	0
Iyd	0	0	0.0255836	0	0.0870643	0	0	0	0
Vip	0	0	0	0	0.0292976	0	0	0	0
Oprm1	0	0	0.0166485	0	0.0189054	0	0	0	0
Mir5104	0	0	0	0	0	0	0	0	0
Gm6150	0	0	0	0	0	0	0	0	0
Adgb	0	0.00814983	0.00696201	0	0.0474887	0.0086122	0	0	0.00696964
4930567K20Rik	0	0	0	0	0	0	0	0	0
Hymai	0	0	0	0	0	0	0	0	0
Zc2hc1b	0	0	0	0	0	0	0	0	0
C330004P14Rik	0	0	0	0	0	0	0	0	0
Arfgef3	0	0	0.00873911	0	0	0	0	0	0
Gm4922	0	0	0	0	0	0	0	0	0
4930444F02Rik	0	0	0	0	0	0	0	0	0
Olig3	0	0	0	0	0	0	0	0	0
Il20ra	0	0	0	0	0	0	0	0.0186466	0
4930405J17Rik	0	0	0	0	0	0	0	0	0
Mir6413	0	0	0	0	0	0	0	0	0
1700020N01Rik	0	0	0	0	0	0.0488043	0.0429837	0	0
4930444G20Rik	0	0	0	0	0.0497161	0	0.0956374	0	0
Mir7663	0	0	0	0	0	0	0	0	0
Tcf21	0	0	0	0	0	0	0	0	0
Snora33	0	0	0	0	0	0	0	0	0
Snord100	0	0	0	0	0	0	0	1179.22	0
Taar1	0	0	0	0	0	0	0	0	0
Taar2	0	0	0	0	0	0	0	0	0
Taar3	0	0	0	0	0	0	0	0	0
Taar4	0	0	0	0	0	0	0	0	0
Taar5	0	0	0	0	0	0	0	0	0
Taar6	0	0	0	0	0	0	0	0	0
Taar7a	0	0	0	0	0	0	0	0	0
Taar7b	0	0	0	0	0	0	0	0	0
Taar7d	0	0	0	0	0	0	0	0	0
Taar7e	0	0	0	0	0	0	0	0	0
Taar7f	0	0	0	0	0	0	0	0	0
Taar8a	0	0	0	0	0	0	0	0	0
Taar8b	0	0	0.0404324	0	0	0	0	0	0.0401174
Taar8c	0	0	0	0	0	0	0	0	0
Taar9	0	0	0	0	0	0	0	0	0
Mir6905	0	0	0	0	0	0	0	0	0
Smlr1	0	0	0	0	0	0	0	0	0
4930401C15Rik	0	0	0	0	0	0	0	0	0
Mir680-3	0	0	0	0	0	0	0	0	0
Gm9767	0	0	0	0	0.0387776	0	0	0	0.0340081
Samd3	0	0.0240737	1.46146	0	0.0934542	0	0.0224633	0.0419735	0.0615948
4930579H20Rik	0	0	0	0	0	0	0	0	0
2310057J18Rik	0	0	0	0	0	0	0	0	0
Soga3	0	0.0217797	0	0	0	0	0.0101337	0	0
D830005E20Rik	0	0	0	0	0	0	0	0	0
Clvs2	0	0	0	0	0.085556	0	0	0	0
Gm4794	0	0	0	0	0	0	0	0	0
Sult3a1	0	0.0441404	0	0	0	0	0	0	0
Trappc3l	0	0	0	0	0	0	0	0	0
Fam26d	0	0	0	0	0	0	0	0	0
4930591E09Rik	0	0	0	0	0	0	0	0	0
Rfpl4b	0	0	0	0	0	0	0	0	0
Wisp3	0	0	0.0280744	0	0.0318377	0.0348406	0	0	0
Slc22a16	0	0	0	0	0	0	0	0	0
Gpr6	0	0	0	0	0	0	0	0	0
5730435O14Rik	0	0	0	0	0	0	0	0	0
Nr2e1	0	0	0	0.0133701	0	0	0	0	0.0114651
F830002L21Rik	0	0	0	0	0	0	0.0230313	0.0430334	0
1700027J07Rik	0	0	0	0	0	0	0	0	0.0390086
4933404K13Rik	0	0	0.105631	0	0	0	0	0	0
Speer5-ps1	0	0	0	0	0	0	0.0478788	0	0.0433183
Mir1929	0	0	0	0	0	0	0	0	0
Lin28b	0	0	0	0	0	0	0	0	0
D030045P18Rik	0	0	0	0	0.0462413	0.0504978	0	0	0
Snord14d	0	0	0	0	0	0	0	0	0
Snord14c	0	0	0	0	0	0	0	0	0
C130030K03Rik	0	0.0411924	0	0.0205422	0	0	0.0192042	0	0
Fam162b	0	0	0	0	0	0	0	0	0
Gprc6a	0	0	0	0	0	0	0	0	0
Rfx6	0	0	0	0	0	0	0	0	0
4933411G06Rik	0	0	0	0	0	0	0	0	0
Ros1	0	0	0.0048617	0	0	0	0	0	0
Gm19395	0	0	0	0	0.0805023	0.0891289	0	0	0
Gm16998	0	0.0385991	0.0660598	0	0	0	0	0	0
4930467K11Rik	0	0	0	0	0	0	0	0	0
Dux	0	0	0	0	0	0	0	0	0
Gm4981	0	0	0	0	0	0	0	0	0
Edar	0	0	0.0600491	0	0.0227476	0	0	0.0101921	0
BB019430	0	0	0	0	0	0	0	0	0
Pla2g12b	0	0	0	0	0	0	0	0	0
Mir6906	0	0	0	0	0	0	0	0	0
Gm17455	0	0	0	0	0	0	0	0	0
Mir6408	0	0	0	0	0	0	0	0	0
Pldi	0	0	0	0	0	0	0	0	0
Mir466j	0	0	0	0	0	0	0	0	0
Gm20611	0	0	0	0	0	0	0	0	0
Prf1	0	0.0217832	3.31482	0.0869185	0.0845689	0.046155	0.0406318	0.0949146	0.0929249
Mir5108	0	0	0	0	0	0	0	0	0
Neurog3	0	0	0	0	0	0	0	0	0.0254846
Mir7662	0	0	0	0	0	0	0	0	0
Hkdc1	0	0	0	0	0	0	0	0	0
Mir7215	0	0	0	0	0	0	0	0	0
Snord98	0	0	0	0	0	0	0	0	0
Atoh7	0	0.143335	0	0	0	0	0	0	0
Lrrtm3	0	0	0	0	0.0216876	0.0118075	0	0.00971619	0.0477259
1700023F02Rik	0	0	0.194753	0	0	0	0	0	0
4930407I19Rik	0	0	0	0	0	0	0	0	0
4930545H06Rik	0	0	0	0	0	0	0	0	0
Tmem26	0	0.00842652	0.338329	0.00839023	0.0163668	0.0178101	0.00783744	0	0.0504414
D630013N20Rik	0	0	0	0	0	0	0	0	0
C730027H18Rik	0	0	0	0	0	0	0	0	0
1700113B09Rik	0	0	0	0	0	0	0	0	0
1700049L16Rik	0	0	0	0	0	0	0	0	0
A330049N07Rik	0	0	0	0	0.0218939	0	0	0	0.0192438
Pcdh15	0	0	0.2461	0.00457867	0.00461303	0.00987557	0	0.0149971	0.00406393
Rsph14	0	0	0	0	0	0	0	0	0
4933407G14Rik	0	0.0749512	0	0	0	0	0.0350644	0.0327355	0
Ggt1	0	0	0.502544	0	0.142646	0.1333	0	0	0
Gm5134	0	0.0154113	0.0658527	0.0153598	0	0	0	0	0
Mir6409	0	0	0	0	0	0	0	0	0
Slc5a4b	0	0	0	0.0208665	0	0	0	0	0
Slc5a4a	0	0	0	0	0	0	0	0	0
Mir678	0	0	0	0	7.21e-199	0	0	0	8.34e-118
Gm10787	0	0	0	0	0	0	0	0	0
Mir1930	0	0	0	0	0	0	0	0	0
Tspear	0	0	0.0308447	0	0.0350311	0.0191024	0	0	0
Gm19402	0	0	0	0	0	0	0	0	0
Gm10272	0	0	0	0	0	0	0	0	0
Gm10024	0	0	0	0	0	0	0	0	0
Gm10142	0	0	0	0	0	0	0	0	0
Krtap12-1	0	0	0	0	0	0	0	0	0
Gm10100	0	0	0	0	0	0	0	0	0
Gm3238	0	0	0	0	0	0	0	0	0
Gm19668	0	0	0	0	0	0	0	0	0
Gm2696	0	0	0	0	0	0	0	0	0
Krtap10-4	0	0	0	0	0	0	0	0	0
Krtap10-10	0	0	0	0	0	0	0	0	0
Gm10318	0	0	0	0	0	0	0	0	0
Gm3285	0	0	0	0	0	0	0	0	0
1700009J07Rik	0	0	0.14089	0	0	0	0	0	0
Trpm2	0	0.0346739	0.468925	0	0.0336774	0.0183124	0.0376045	0.0200959	0.0346089
Aire	0	0	0.117848	0	0	0	0	0	0
Mir7659	0	0	0	0	0	0	0	0	0
Mir6907	0	0	0	0	0	0	0	0	0
Mir6410	0	0	0	0	0	0	0	0	0
Mir6908	0	0	0	0	0	0	0	0	0
Olfr1357	0	0	0	0	0	0	0	0	0
Casp14	0	0	0	0	0	0	0	0	0
Ccdc105	0	0	0	0	0	0	0	0	0
Slc1a6	0	0	0	0	0	0	0	0	0
Olfr1356	0	0	0	0	0	0	0	0	0
Olfr1355	0	0	0	0	0	0	0	0	0
Olfr1354	0	0	0	0	0	0	0	0	0
Olfr8	0	0	0	0	0	0	0	0	0
Olfr1353	0	0.0373398	0	0	0	0	0	0	0
Olfr1352	0	0	0	0	0	0	0	0	0
Olfr1351	0	0	0	0	0	0	0	0	0
Olfr57	0	0	0	0	0	0	0	0.078548	0
Vmn2r80	0	0	0	0	0	0	0	0	0
Vmn2r81	0	0	0	0	0	0	0	0	0
Vmn2r82	0	0	0	0	0	0	0	0	0
Vmn2r83	0	0	0	0	0	0	0	0	0
Mir6909	0	0	0	0	0	0	0	0	0
Theg	0	0	0	0	0	0	0	0	0
C2cd4c	0	0	0	0.00634684	0.00619261	0.00673559	0	0.00554358	0
Madcam1	0	0	0.420445	0	0	0.0695697	0	0	0
Fgf22	0	0	0	0	0	0	0	0	0
Mir6910	0	0	0	0	0	0	0	0	0
Mir6911	0	0	0	0	0	0	0	0	0
Onecut3	0	0.0182046	0.00777608	0	0	0	0	0	0.0077829
Atp8b3	0	0.00969792	0	0.0193157	0.00941759	0.0102511	0.00902231	0	0.0165827
Mir6912	0	0	0	0	0	0	0	0	0
Mir1982	0	0	0	0	0	0	0	0	0
Diras1	0	0.0149418	0.012769	0.014891	0.0435197	0.0158095	0.0139159	0.0260153	0.0382894
Mir5615-1	0	0	0	0	0	0	0	0	0
Mir5615-2	0	0	0	0	0	0	0	0	0
Snord37	0	0	0	0	0	0	0	0	0
Mir3057	0	0	0	0	0	0	0	0	0
Mir6913	0	0	0	0	0	0	0	0	0
Mir1191b	0	0	0	0	0	0	0	0	0
Gm1553	0	0	0	0	0	0	0	0	0
1700028I16Rik	0	0	0	0	0	0	0	0	0
Platr7	0	0	0	0	0	0	0	0	0
Bpifc	0	0	0	0	0	0	0	0.016574	0
4930486F22Rik	0	0	0	0	0	0	0	0	0
1700113H08Rik	0	0	0.0298617	0	0	0.0370687	0	0	0
Pah	0	0	0	0	0	0	0	0	0
Pmch	0	0	0	0	0	0	0	0	0
Slc5a8	0	0.00797164	0	0	0.209029	0.0505417	0.022241	0	0.0136349
Anks1b	0	0.0275598	0.0103031	0	0.00565572	0.00970894	0.00854504	0.00799008	0.029766
Mir135a-2	0	0	0	0	0	0	0	0	0
Rmst	0	0	0	0	0	0	0	0	0
Mir1251	0	0	0	0	0	0	0	0	0
Gm20757	0	0	0	0	0	0	0	0	0
Mir1931	0	0	0	0	0	0	0	0	0
Mir7688	0	0	0	0	0	0	0	0	0
4933408J17Rik	0	0.0242871	0.0830647	0.0727077	0.0471398	0.0257423	0.0453258	0.021173	0.0207124
Gm15915	0	0	0	0	0	0	0.0519073	0	0.0468879
Usp44	0	0	0.0148557	0	0	0	0	0.0128859	0.0148398
Mir331	0	0	0	0	0	0	0	0	0
Gm4792	0	0	0	0	0	0	0	0	0
Mir7211	0	0	0	0	0	0	0	0	0
Gm29684	0	0	0	0	0	0	0	0	0
5730420D15Rik	0	0	0	0	0	0.0439944	0	0	0
Mir3058	0	0	0	0	0	0	0	0	0
4930556N09Rik	0	0	0	0	0	0	0	0	0
Mir3966	0	0	0	0	0	0	0	0	0
4930473O22Rik	0	0	0	0	0	0	0	0	0
Kera	0	0	0	0.0459961	0	0	0	0	0
Epyc	0	0	0	0.026356	0.0512437	0.111988	0	0	0.0450189
Gm10754	0	0	0	0	0	0	0	0	0
Ccer1	0	0	0	0	0	0	0	0	0
4930525C09Rik	0	0	0	0	0	0	0	0	0
Gm8633	0	0	0	0	0	0	0	0	0
Gm20110	0	0.0639629	0.036454	0.0638017	0.0206941	0	0.019883	0.0185789	0.0727685
Gm18409	0	0	0	0	0	0	0	0	0.0150111
Gm4302	0	0	0	0	0	0	0.00107878	0.000999383	0
Gm4303	0	0	0	0	0	0	0.10243	0.0472594	0
Gm4307	0	0	0	0	0	0	0	0	0
Gm4312	0	0	0	0	0	0	0	0	0
1700017N19Rik	0	0	0	0	0	0	0	0	0
Mgat4c	0	0	0	0	0.0111828	0	0	0	0
Mir3059	0	0	0	0	0	0	0	0	0
Alx1	0	0	0.015111	0	0	0	0	0	0
Lrriq1	0	0	0.00694278	0	0	0	0	0	0
Gm8764	0	0	0	0	0	0	0	0	0
Gm21312	0	0	0	0	0	0	0	0	0
Gm21304	0	0	0	0	0	0	0	0	0
Mir6411	0	0	0	0	0	0	0	0	0
4930532I03Rik	0	0	0	0	0	0	0	0	0
Ptprq	0	0	0	0	0	0	0	0	0
Otogl	0	0	0	0	0	0.00638007	0	0	0
Gm29685	0	0	0	0	0	0	0	0	0
Syt1	0	0.054071	0.0846983	0.0179428	0	0	0	0	0
Gm5136	0	0	0	0	0	0	0	0	0
9230102K24Rik	0	0	0	0	0	0	0	0	0
1700020G17Rik	0	0	0	0	0	0	0	0	0
4933440J02Rik	0	0	0.0359312	0	0	0	0	0	0
Gm20758	0	0	0	0	0	0	0	0	0
Glipr1l1	0	0	0	0	0	0	0	0	0
Glipr1l2	0	0	0	0	0	0	0	0	0
Caps2	0	0	0	0	0	0.0167863	0	0	0
1700010J16Rik	0	0	0	0	0	0	0	0	0
Mir669h	0	0	0	0	0	0	0	0	0
Tph2	0	0.0167251	0	0.0166723	0	0	0	0	0
A930009A15Rik	0	0	0.0417768	0	0	0	0	0	0
4933416C03Rik	0	0	0	0	0	0	0	0	0
Kcnmb4	0	0	0.293134	0	0	0.0520784	0	0	0
Kcnmb4os1	0	0	0.179462	0.070081	0.135177	0	0.0657321	0	0
Kcnmb4os2	0	0	0.172198	0.0287206	0	0.0610245	0.0805935	0.0501845	0
1700030O20Rik	0	0	0	0	0	0	0	0	0.0804621
4930579P08Rik	0	0	0	0	0	0	0	0	0
Myrfl	0	0.0139597	0.011929	0.0139103	0.0135536	0.0147676	0	0	0
D630029K05Rik	0	0	0	0	0.0202748	0	0	0	0
9530003J23Rik	0	0	0	0	0	0	0	0	0
Il22	0	0	0	0	0	0	0	0	0
Iltifb	0	0	0	0	0	0	0	0	0
Ifng	0	0.0394491	0.101277	0	0	0	0	0.0344697	0.100666
Tmevpg1	0	0	0.220773	0	0	0	0	0	0
Gm38403	0	0	0.0160485	0	0	0	0	0	0
1700064J06Rik	0	0	0	0	0	0	0	0	0
4930477N07Rik	0	0	0	0	0	0	0	0	0
1700025F24Rik	0	0	0	0	0	0	0	0	0
Grip1os2	0	0	0	0	0	0	0	0	0
Hmga2	0	0.0102658	0.0350824	0.0204483	0.0199375	0.0217049	0.0286551	0	0
9230105E05Rik	0	0	0	0.0393674	0	0.0209026	0	0.0171952	0
Mir763	0	0	0	0	0	0	0	0	0
4921513I03Rik	0	0	0.0249309	0	0.0282832	0	0	0	0
D930020B18Rik	0	0.0126212	0	0	0	0	0	0.0109836	0
Gm4489	0	0	0	0	0.111427	0	0	0	0
Mir8104	0	0	1.03e-26	0	4.46e-24	0	0	0	0
Mirlet7i	0	0	0	0	0	0	0	0	0
Fam19a2	0	0.0206532	0	0	0	0	0	0	0
4930503E24Rik	0	0	0	0	0	0	0	0	0
Mir378d	0	0	0	0	0	0	0	0	0
4930484H19Rik	0	0	0	0	0	0	0	0	0
Mir26a-2	0	0	0	0	0	0	0	0	0
Mettl21b	0	0	0.131738	0	0	0	0.072455	0	0
Cyp27b1	0	0	0.0311865	0	0.0177093	0	0.0170021	0	0.0155743
Inhbe	0	0	0	0	0.0202748	0	0	0	0.0178245
Inhbc	0	0	0	0	0	0	0	0	0
Tac2	0	0	0	0	0	0	0	0	0
BC089597	0	0	0.031979	0	0	0	0	0	0
Rdh7	0	0	0	0	0	0	0	0	0
Sdr9c7	0	0	0	0	0	0	0	0	0
Hsd17b6	0	0.0317808	0	0	0	0	0	0	0
Mir677	0	285.223	0	0	0	294.504	0	0	0
Apon	0	0	0.0242103	0	0	0	0	0	0
Il23a	0	0.0344372	0.0294616	0	0.0334054	0.0731396	0.096604	0.0601353	0
Mir6914	0	0	0	0	0	0	0	0	0
Mir6915	0	0	0	0	0	0	0	0	0
Slc39a5	0	0	0	0	0	0	0	0	0
Mir8105	0	0	0	0	0	0	0	0	0
Mir6916	0	0	0	0	0	0	0	0	0
Mir6917	0	0	0	0	0	0	0	0	0
Mettl7b	0	0.0387079	0.0662464	0.19352	0.863444	0.329102	0.21736	0.0338183	0.724437
Olfr9	0	0	0	0	0	0	0	0	0
Olfr763	0	0	0	0	0	0	0	0	0
Olfr765	0	0	0	0	0	0	0	0	0
Olfr767	0	0	0	0	0	0	0	0	0
Olfr768	0	0	0	0	0	0	0	0	0
Olfr769	0	0	0	0	0	0	0	0	0
Olfr770	0	0	0	0	0	0	0	0	0
Olfr771	0	0	0	0	0	0	0	0	0
Olfr772	0	0	0	0	0	0	0	0	0
Olfr773	0	0	0	0	0	0	0	0	0
Olfr774	0	0	0	0	0	0	0	0	0
Olfr775	0	0	0	0	0	0	0	0	0
Olfr776	0	0	0	0	0	0	0	0	0
Olfr777	0	0	0	0	0	0	0	0	0
Olfr780	0	0	0	0	0	0	0	0	0
Olfr781	0	0	0	0	0	0	0	0	0
Olfr782	0	0	0	0	0	0	0	0	0
Olfr784	0	0	0	0	0	0	0	0	0
Olfr785	0	0	0	0	0	0	0	0	0
Olfr786	0	0	0	0.106335	0	0	0	0	0
Olfr787	0	0	0	0	0	0	0	0	0
Olfr788	0	0	0	0	0	0	0	0	0
Olfr789	0	0	0	0	0	0	0	0	0
Olfr790	0	0	0	0	0	0	0	0	0
Olfr791	0	0	0	0	0	0	0	0	0
Olfr792	0	0	0	0	0	0	0	0	0
Olfr794	0	0.0514751	0	0	0	0	0	0	0
Olfr796	0	0	0	0	0	0	0	0	0
Olfr798	0	0	0	0	0	0	0	0	0
Olfr799	0	0	0	0	0	0	0	0	0
Olfr800	0	0	0	0	0	0	0	0	0
Olfr801	0	0	0	0	0	0	0	0	0
Olfr802	0	0	0	0	0	0	0	0	0
Olfr803	0	0	0	0	0	0	0	0	0
Olfr804	0	0	0	0	0	0	0	0	0
Olfr805	0	0.0516688	0	0	0	0	0	0	0
Olfr806	0	0.105724	0	0	0	0	0	0	0
Olfr807	0	0	0	0	0	0	0	0	0
Olfr808	0	0	0	0	0	0	0	0	0
Olfr809	0	0	0	0	0	0	0	0	0
Olfr810	0	0	0	0	0	0	0	0	0
Olfr811	0	0	0	0	0	0	0	0	0
Olfr812	0	0	0	0	0	0	0	0	0
Olfr813	0	0	0	0	0	0	0	0	0
Olfr814	0	0	0	0	0	0	0	0	0
Olfr815	0	0	0	0	0	0	0	0	0
Olfr816	0	0	0	0	0	0	0	0	0
Olfr818	0	0	0	0	0	0	0	0	0
Olfr819	0	0	0	0	0	0	0	0	0
Olfr247	0	0	0	0	0	0	0	0	0
Olfr820	0	0	0.0454468	0	0	0	0	0	0
Olfr821	0	0	0	0	0	0	0	0	0
Olfr822	0	0	0	0	0	0	0	0	0
Olfr823	0	0	0	0	0	0	0	0	0
Olfr824	0	0	0	0	0	0	0	0	0
Olfr825	0	0	0	0	0	0	0	0	0
Olfr826	0	0	0	0	0	0	0	0	0
Olfr827	0	0	0	0	0	0	0	0	0
Neurod4	0	0	0	0	0	0	0	0	0
Vmn2r84	0	0	0	0	0	0	0	0	0
Vmn2r85	0	0	0	0	0	0	0	0	0
Vmn2r86	0	0	0	0	0	0	0	0	0
Vmn2r87	0	0	0.0295369	0	0	0	0	0	0
Mir3470a	0	0	0	0	0	0	0	0	0
Gm11944	0	0.2333	0.0999301	0.175437	0	0.124429	0.0548077	0.102218	0.0989015
Mir3060	0	0	0	0	0	0	0	0	0
Hormad2	0	0	0	0	0	0	0.0979229	0.0304774	0
Gm11961	0	0	0	0	0	0	0	0	0
Cabp7	0	0	0	0	0	0	0.072455	0.0674957	0
Mir6918	0	0	0	0	0	0	0	0	0
AA413626	0	0	0	0	0	0	0.164791	0	0.14249
Nefh	0	0	0.52396	0	0.0104475	0.011375	0.0200234	0.0187208	0.00919686
Mir3079	0	0	0	0	0	0	0	0	0
Ankrd36	0	0	0	0	0	0	0	0	0.00813834
Myl7	0	0	0	0	0	0	0	0	0
Mir7651	0	0	0	0	0	0	0	0	0
Snora5c	0	0	0	0	0	0	0	0	0
Wap	0	0	0	0	0	0	0	0	0
Gm11978	0	0	0	0	0.0349514	0	0	0	0
Gm11981	0	0	0	0	0	0	0	0	0
Gm11985	0	0	0	0	0	0	0	0	0
Igfbp1	0	0	0	0	0	0	0	0	0
Sun3	0	0.0878063	0	0.08786	0	0	0	0	0
Abca13	0	0.00779901	0.00444017	0	0	0	0	0	0
Vwc2	0	0	0.185531	0.0120173	0.0117133	0.0510275	0	0	0.0206187
Ddc	0	0	0.0982022	0	0.0668827	0	0.0428565	0.0200179	0.0391874
1700042O10Rik	0	0	0	0	0	0	0	0	0
4930554G24Rik	0	0	0	0	0	0	0	0	0
1700046C09Rik	0	0	0	0	0	0	0	0	0
Pom121l12	0	0	0	0	0	0	0	0	0
Vstm2a	0	0	0	0	0	0	0.0343986	0	0
Fbxo48	0	0	0.0720863	0	0.0409227	0.0223307	0	0	0.0179881
4933406G16Rik	0	0	0	0	0	0	0	0	0
Mir1933	0	0	0	0	0	0	0	0	0
4932414J04Rik	0	0	0	0	0	0	0	0	0
Otx1	0	0	0	0	0	0.0163753	0	0	0.0132173
1700061J23Rik	0	0	0	0	0	0	0	0	0
4933430M04Rik	0	0	0	0	0	0	0	0	0
Gm10466	0	0	0	0	0	0	0	0	0
4933427E13Rik	0	0	0	0	0	0	0	0	0
5730522E02Rik	0	0	0	0.0606284	0	0	0	0	0
Mir6372	0	0	0	0	0	0	0	0	0
2810471M01Rik	0	0	0	0.0286804	0	0	0	0.0250571	0.0244769
Mir216b	0	0	0	0	0	0	0	0	0
Mir216c	0	0	0	0	0	0	0	0	0
Mir216a	0	0	0	0	0	0	0	0	0
Mir217	0	0	0	0	0	0	0	0	0
4930505A04Rik	0	0	0.0925677	0	0	0.230394	0.253685	0.331268	0
4930524B15Rik	0	0	0	0	0	0	0	0.0199903	0.019564
Gm12108	0	0	0	0	0	0	0	0	0
Hba-x	0	0	0	0	0	0	0	0.082992	0
Hbq1b	0	0	0	0.0706855	0	0	0.132603	0	0.119099
Hbq1a	0	0	0	0	0.0903105	0.100225	0.176705	0	0
Efcab9	0	0.068168	0.0584297	0.205327	0.0660276	0	0.128376	0.17947	0
Smim23	0	0	0	0	0	0	0	0	0
Tlx3	0	0	0	0	0	0	0	0	0
Ranbp17	0	0.0681051	0.0436345	0.0593357	0.0248004	0.0269879	0.0158339	0.0740405	0.0218379
Gabrp	0	0	0	0	0.102659	0.0698967	0	0	0
Kcnip1	0	0	0	0	0	0	0	0	0
Foxi1	0	0	0	0	1.31402	0.119443	0	0	0
Mir218-2	0	0	0	0	0	0	0	0	0
Mir103-1	0	0	0	0	0	0	0	0	0
Fbll1	0	0	0	0	0	0	0	0	0
Wwc1	0	0.0261392	0.0111678	0.0520869	0.545667	0.138237	0.0730051	0.0568728	0.022335
Gm12128	0	0	0	0	0	0	0	0	0
Gm12130	0	0	0	0	0	0	0	0	0
4930553C11Rik	0	0	0	0	0	0	0	0	0
Gabra6	0	0	0	0	0	0	0	0	0
Gabrb2	0	0	0.0285739	0	0.00541545	0.041224	0.0155485	0.0436234	0
Mir146	0	0	0	0	0	0	0	0	0
Fabp6	0	0	0.101941	0	0	0	0	0	0
Il12b	0	0	0.255569	0.0350713	0	0	0	0	0.0750876
4930597A21Rik	0	0	0	0	0	0	0	0	0
Gm12159	0	0	0.0548788	0.0640897	0.0311198	0.102148	0.059961	0	0
F630206G17Rik	0	0	0.0315359	0	0.0179074	0	0	0	0
Mir8100	0	0	0	0	0	0	0	0	0
Nipal4	0	0.0263061	0.056196	0.039315	0.127709	0.0695611	0.0367362	0.034342	0.0561932
Mir7239	0	0	0	0	0	0	0	0	0
Mir6989	0	0	0	0	0	0	0	0	0
Fam71b	0	0	0.225835	0	0	0.0215236	0.0568423	0	0
Gm12169	0	0	0	0	0	0	0	0	0
Gm12171	0	0	0	0	0	0	0	0	0
BC053393	0	0	0	0	0	0	0	0.0190943	0.0186933
Dppa1	0	0	0	0	0	0	0	0	0
Gm4926	0	0	0	0	0	0	0	0	0
Timd2	0	0	0	0	0.0144714	0.0315463	0	0	0
Havcr1	0	0	0.784944	0	0.0234281	0	0	0	0
Mir6380	0	0	0	0	0	0	0	0	0
Snord96a	0	0	0	0	0	0	442.331	0	0
Snord95	0	0	0	0	0	0	0	0	0
Olfr1395	0	0	0	0	0	0	0	0	0.0441869
Olfr1394	0	0	0	0	0	0	0	0	0
Olfr1393	0	0	0	0	0	0	0	0	0
Olfr1392	0	0	0	0	0.0462623	0.0508004	0	0	0
Olfr10	0	0	0	0	0	0	0	0	0
Olfr1391	0	0	0	0	0	0	0	0	0
Olfr1390	0	0	0	0	0	0	0	0	0
Olfr1389	0	0	0	0	0	0	0	0	0
Olfr1388	0	0	0	0	0	0	0	0	0
Olfr1387	0	0	0	0	0	0	0	0	0
Olfr1386	0	0	0	0	0	0	0	0	0
Olfr1385	0	0	0	0	0	0	0	0	0
Olfr1384	0	0	0	0	0	0	0.088657	0.0827241	0.0803262
Olfr1382	0	0	0	0	0	0	0	0	0
Olfr1381	0	0	0	0	0	0	0	0	0
Olfr1380	0	0	0	0	0	0	0	0	0
Mir340	0	0	0	0	0	0	0	0	0
Mir6919	0	0	0	0	0	0	0	0	0
Mir804	0	0	0	0	0	0	0	0	0
Grm6	0	0	0.0168845	0	0	0	0	0	0
Prop1	0	0	0	0	0	0	0	0	0
Olfr1378	0	0	0	0	0	0	0	0	0
Olfr1377	0	0	0	0	0	0	0	0	0
Olfr51	0	0	0	0	0	0	0	0	0
Olfr54	0	0	0	0	0	0	0	0	0
Olfr1375	0	0	0	0	0	0	0	0	0
9230009I02Rik	0	0	0	0	0	0	0	0	0
Platr20	0	0	0	0	0	0	0	0	0
Mir3061	0	0	0	0	0	0	0	0	0
Olfr1373	0	0	0	0	0	0	0	0	0
Olfr1371	0	0	0	0	0	0	0	0	0
Fstl4	0	0	0	0	0	0	0	0	0
Gm11186	0	0	0	0	0	0	0	0	0
Mir6920	0	0	0	0	0	0	0	0	0
Leap2	0	0	0	0	0	0	0	0	0.309935
Il13	0	0	0	0	0	0	0	0	0
Mir7671	0	0	0	0	0	0	0	0	0
4933405E24Rik	0	0	0	0	0	0	0	0	0
Csf2	0	0	0	0	0.045891	0	0	0	0
Il3	0	0	0	0	0	0	0	0	0
Meikin	0	0	0.0277423	0	0	0	0	0	0
Lyrm7os	0	0	0	0	0	0	0	0	0
Slc36a3	0	0	0	0	0.0250604	0	0.0241052	0	0.0220178
Fat2	0	0	0	0	0.011226	0.0152505	0	0	0
Gm12238	0	0	0	0	0	0	0	0	0
Glra1	0	0.0369929	0	0.018434	0	0.0195726	0	0.0161017	0.0631744
Nmur2	0	0	0	0	0	0	0	0	0
Hand1	0	0	0	0	0	0	0	0	0
Lypd8	0	0	0	0	0	0	0	0.0409303	0
1810065E05Rik	0	0	0	0	0	0	0	0	0
4930504O13Rik	0	0	0	0	0	0	0	0	0
Olfr30	0	0	0	0	0	0	0	0	0
Olfr332	0	0.0286434	0	0	0	0	0	0	0
Olfr331	0	0	0	0	0	0	0	0	0
Olfr330	0	0	0	0	0	0	0	0	0
Olfr329-ps	0	0	0	0	0	0	0	0.0412191	0
Olfr328	0	0	0	0	0	0	0	0	0
Olfr224	0	0	0	0	0	0	0	0.0461046	0
Olfr325	0	0	0	0	0	0	0	0	0
Olfr324	0	0	0	0	0	0	0	0	0
2210407C18Rik	0	0	0	0	0.111462	0.184011	0	0	0
Olfr323	0	0	0	0	0	0	0	0	0
Trim58	0	0	0	0	0	0	0.0189287	0	0.0173256
Olfr322	0	0	0	0	0	0	0	0	0
Olfr320	0	0	0	0	0	0	0	0	0
Olfr319	0	0	0	0	0	0	0	0	0
Olfr318	0	0	0	0	0	0	0	0	0
Olfr317	0	0	0	0	0	0	0	0	0
Olfr316	0	0	0	0	0	0	0	0	0
Olfr315	0	0	0	0	0	0	0	0	0
Olfr314	0	0	0	0	0	0	0	0	0
Olfr313	0	0	0	0	0	0	0	0	0
Olfr312	0	0	0	0	0	0	0	0	0
Olfr311	0	0	0	0	0	0	0	0	0
Btnl10	0	0	0	0	0	0	0	0	0
Hist3h2ba	0	0	0.592001	0.139506	0	0	0.131451	0.244071	0
Trim17	0	0	0	0	0.026347	0	0.0507025	0	0
Gjc2	0	0.0614569	0.0875743	0.0204123	0.0795446	0.0433879	0.019083	0.0356907	0.0349567
Wnt3a	0	0	0	0	0	0	0	0	0
Prss38	0	0	0	0	0	0	0	0	0
Olfr222	0	0	0	0	0	0	0	0	0
Olfr223	0	0	0	0	0	0	0	0	0
Olfr225	0	0	0	0	0	0	0	0	0
1810063I02Rik	0	0	0.3152	0	0	0	0.361498	1.32625	0.586648
Mir6921	0	0	0	0	0	0	0	0	0
Mir6922	0	0	0	0	0	0	0	0	0
Mir5100	0	0	0	0	0	0	0	0	0
Aldh3a1	0	0	0.61499	0	0.0837227	0.0915336	0.026862	0.0501818	0
Slc5a10	0	0.0196343	0.0167835	0.0195802	0.0190584	0.0831707	0.0183037	0.0513143	0.0167578
Snord49b	0	0	0	0	0	0	0	0	0
Snord49a	0	0	0	0	0	0	0	0	0
Snord65	0	0	0	0	0	0	0	0	0
Cdrt4	0	0.0735202	0	0	0	0	0	0	0.0621725
Mir6354	0	0	0	0	0	0	0	0	0
Cdrt4os1	0	0	0	0	0	0	0	0	0
Tekt3	0	0	0	0	0	0	0	0	0
F930015N05Rik	0	0	0.06254	0	0.011845	0	0.0567745	0.0318462	0.0312753
Mir744	0	0	0	0	0	0	0	0	0
Dnah9	0	0.00605384	0.01034	0	0	0	0.0028122	0.00263037	0.00259088
Gm12298	0	0	0	0	0	0	0	0	0
9130409J20Rik	0	0	0	0	0	0	0	0	0
Mir6923	0	0	0	0	0	0	0	0	0
Rcvrn	0	0	0	0	0	0	0.0858709	0	0
Glp2r	0	0	0	0	0.00849426	0	0	0.00760739	0.0149587
Mir6406	0	0	0	0	0	0	0	0	0
Ccdc42	0	0	0	0	0	0	0	0	0.0294642
Rnf222	0	0	0.0138716	0.0161786	0	0.0171776	0.0151205	0	0
Odf4	0	0	0	0.0435127	0	0	0.122222	0	0.0369652
Mir3062	0	0	0	0	0	0	0	0	0
Aloxe3	0	0	0.0148244	0	0	0.0183602	0	0	0.0148095
Alox12b	0	0	0	0	0	0	0	0	0
Gucy2e	0	0.0100878	0.00430802	0.00501982	0	0	0.0093761	0	0.0172632
Mir1934	0	0	0	0	0	0	0	0	0
Slc35g3	0	0.0308527	0.0263897	0.0616315	0.029933	0.0654827	0.0576565	0	0.13141
Tmem102	0	0	0	0	0	0.0245502	0	0	7.63e-10
4933402P03Rik	0	0	0	0	0	0	0	0	0
Spem1	0	0	0	0	0	0	0	0	0
Tmem95	0	0	0	0	0	0	0	0.0988001	0
Mir6924	0	0	0	0	0	0	0	0	0
Mir324	0	0	0	0	0	0	0	0	0
Asgr1	0	0	0	0	0	0	0	0	0
Mir497b	0	0	0	0	0	0	0	0	0
Mir497	0	0	0	0	0	0	0	0	0
Mir195a	0	0	0	0	0	0	0	0	0
Alox12e	0	0	0.0328155	0	0.0186326	0.121956	0	0	0
Mir7115	0	0	0	0	0	0	0	0	0
Tm4sf5	0	0	0.694834	0	0	0	0.0475816	0	0.0430546
Vmo1	0	2.02202	0.208129	0.488107	0	0.086642	0	0.0711173	0.0683114
Gltpd2	0	0	0	0	0.0384055	0.0420938	0	0.0346031	0
4930544D05Rik	0	0	0	0	0.08132	0	0	0	0
Mir6925	0	0	0	0	0	0	0	0	0
Nlrp1c-ps	0	0.0125063	0	0	0	0	0	0	0
4930401O10Rik	0	0	0	0	0	0	0	0	0
Aipl1	0	0	0	0	0.0284036	0	0.0273446	0	0
Fam64a	0	0.0632203	0.243348	0	0.0920005	0	0	0.0827626	0.0269237
Slc13a5	0	0	0	0	0	0.014029	0	0	0
1700051A21Rik	0	0	0	0	0	0	0	0	0
Fbxo39	0	0	0.022754	0.026561	0	0	0.0248409	0.0232049	0.0453662
Mir6338	0	0	0	0	0	0	0	0	0
Trpv3	0	0.0180911	0	0	0.0175617	0	0	0	0.0154448
Olfr376	0	0	0.0384836	0.0899846	0	0.0478349	0	0	0
Olfr1	0	0	0	0	0	0	0	0	0
Olfr75-ps1	0	0	0	0	0	0	0	0	0
Olfr378	0	0	0	0	0	0	0	0	0
Olfr380	0	0.0532722	0	0	0	0	0	0	0
Olfr381	0	0	0	0	0	0	0	0	0
Olfr382	0	0	0	0	0	0	0	0	0
Olfr385	0	0	0	0	0	0	0	0	0
Olfr384	0	0	0	0.0531674	0	0	0	0	0
Zfp735	0	0	0	0	0	0	0	0	0
Olfr389	0	0	0	0.0334033	0	0	0	0	0
Olfr390	0	0	0	0	0	0	0	0	0
Olfr391-ps	0	0	0	0	0	0	0	0	0
Olfr392	0	0	0	0	0	0	0	0	0
Olfr393	0	0	0	0	0	0	0	0	0
Olfr394	0	0	0	0	0	0	0	0	0
Olfr395	0	0	0	0	0	0	0	0	0
Olfr23	0	0	0	0	0	0	0	0	0
Olfr397	0	0	0	0	0	0	0	0	0
Olfr398	0	0	0	0	0	0	0	0	0
Olfr139	0	0	0	0	0	0	0	0	0
Olfr399	0	0	0	0	0	0	0	0	0
Zfp616	0	0	0	0	0	0	0	0	0
Olfr401	0	0	0	0	0	0	0	0	0
Olfr402	0	0	0	0	0	0	0	0	0
Olfr403	0	0	0	0	0	0	0	0	0
Olfr43	0	0	0	0	0	0	0	0	0
Olfr406	0	0	0	0	0	0	0	0	0
Olfr59	0	0	0	0	0	0	0	0	0
Olfr410	0	0	0	0	0	0	0	0	0
Olfr411	0	0	0	0	0	0	0	0.0406572	0
Olfr412	0	0	0	0	0	0	0	0	0
Mir6926	0	0	0	0	0	0	0	0	0
Snord91a	0	0	4235.31	0	0	0	0	0	0
Mir212	0	0	0	0	0	0	0	0	0
Mir132	0	0	0	0	0	0	0	0	0
Mir22	0	0	3.83e-05	0.000185722	1.46e-07	1.91e-05	4.05e-13	5.02e-07	0
Mir3971	0	0	0	0	0	0	0	0	0
Doc2b	0	0	0.327647	0.100511	0.294011	0.0746808	0.0563396	0.351177	0.276093
1700016K19Rik	0	0	0.186115	0.0544388	0	0	0	0	0
Bhlha9	0	0	0	0	0	0	0.073852	0.0689395	0.0335553
Mir423	0	0	0	0	0	0	0	0	0
Cryba1	0	0	0	0	0	0	0	0	0
Gm11190	0	0	0	0	0	0	0	0	0
Mir144	0	0	0	0	0	0	0	0	0
Mir451b	0	0	0	0	0	0	0	0	0
Mir7653	0	0	1.21e-271	2.78e-162	0	0	9.86e-179	0	0
Snord42a	0	0	0	0	0	0	0	0	0
Snord4a	0	0	0	0	0	0	0	0	699.261
Snord42b	0	0	0	0	0	0	0	0	0
Slc13a2os	0	0	0	0	0	0	0	0	0
Sebox	0	0	0	0	0	0	0	0	0
AU040972	0	0.09413	0.0402935	0	0	0	0	0	0
Omg	0	0	0.0170685	0	0	0	0.0186155	0	0
Rab11fip4os1	0	0	0	0.020298	0	0	0	0	0
Rab11fip4os2	0	0	0	0	0	0	0	0	0
Mir193a	0	0	0	0	0	0	0	0	0
Mir365-2	0	0	0	0	0	0	0	34.6933	0
C030013C21Rik	0	0	0	0	0.0631125	0.139168	0	0	0
4930507D10Rik	0	0	0	0	0	0	0	0	0
Spaca3	0	0	0	0	0	0	0	0	0
Asic2	0	0	0.15053	0	0.0279594	0.0175795	0.0154742	0.014463	0.0283679
5530401A14Rik	0	0	0	0	0	0	0	0	0
Ccl8	0	0.473016	56.2108	0.358707	1.71435	1.14819	0.78762	1.04573	2.28263
Ccl1	0	0	0	0	0.116282	0.129862	0	0	0
Tmem132e	0	0	0.182103	0.00964876	0.0658611	0.0307242	0.0090138	0.0168559	0.0331342
Gm11426	0	0	0	0	0	0	0	0	0
Mir7679	0	0	0	0	0	0	0	0	0
Slfn4	0	0	0.293705	0.0331312	0.0646027	0.023444	0.0412734	0.0385878	0.0758237
Slfn14	0	0	0	0	0	0	0	0	0.0198866
Snord7	0	0	0	0	0	0	0	0	0
Gas2l2	0	0.0148182	0	0.0147675	0.0143867	0.0156784	0	0	0.0126578
Heatr9	0	0	0.270439	0	0.0236116	0	0	0.0424213	0
Ccl4	0	0.0828322	0.63952	0	0.240539	0	0	0.0728547	0.489553
Wfdc18	0	1.18827	0	0.327204	6.05808	8.83988	0	0.38151	0
Hnf1b	0	0	0	0	0	0	0	0	0
Gm11437	0	0.115906	0.0330609	0.115893	0.0374708	0	0	0.0337545	0
Lhx1	0	0	0.0816522	0.0476145	0.015459	0	0.0444995	0.0970504	0.0271988
1700109G15Rik	0	0	0	0	0	0	0	0	0
4930502E09Rik	0	0	0	0	0	0.148688	0.065507	0	0
Bcas3os1	0	0.0138471	0	0	0	0	0	0.0120526	0.0236605
Mir5110	0	0	0	0	0	0	0	0	0
Gm20759	0	0	0	0	0	0	0	0	0
Mir467c	0	0	0	0	0	0	0	0	0
Mir21a	0	0	0	0	0	0	0	0	0
Mir8115	0	0	23.6331	0	0	0	0	28.418	0
Mir301	0	0	0	0	0	0	0	0	0
Tex14	0	0.0178752	0.0458845	0.0267246	0.026063	0.0473014	0.0332983	0.023343	0.0765592
Hsf5	0	0	0.0176203	0	0.0100137	0.0327043	0.00959483	0.00897089	0
1110028F11Rik	0	0	0	0	0	0	0	0	0
Mir142b	0	0	0	0	0	0	0	0	0
Mir142	0	0	0	0	0	0	0	0	0
Mpo	0	0	0.590985	0	0	0	0.0161073	0	0.0442799
Epx	0	0	0.0557062	0	0	0	0	0	0
Olfr462	0	0	0	0	0	0	0	0	0
Olfr463	0	0	0	0	0	0	0	0	0
Olfr464	0	0	0	0	0	0	0	0	0
1700106J16Rik	0	0	0	0	0	0	0	0	0
Mir378b	0	0	0	0	0	0	0	0	0
0610039H22Rik	0	0	0	0	0	0	0	0	0.061415
4930556N13Rik	0	0	0.242874	0.236664	0	0.352309	0.132986	0	0.240978
Gm15698	0	0.635421	0.163352	0.446295	1.66211	0.746309	0.0597749	1.00304	0.269131
2210409E12Rik	0	0	0.165659	0	0.184977	0	0	0	0
Gm525	0	0.295416	0	0.0992897	0.190507	0.529187	0.186618	0.434086	0.248761
Ankfn1	0	0	0.0170272	0.03973	0.0193346	0	0	0	0.0170001
4930405D11Rik	0	0	0	0	0	0	0	0	0
Kif2b	0	0	0	0	0	0	0	0	0
Spata20	0	0	0	0	0	0	0	0	0
Mycbpap	0	0.0148986	0	0	0.0289293	0	0.0138755	0	0.0127263
Gm11545	0	0	0.153071	0	0	0.0172321	0	0.0141774	0.0139049
Tmem92	0	0	0	0.0218542	0	0	0	0	0
Hils1	0	0	0	0	0.0569198	0	0	0	0
A730090H04Rik	0	0	0	0	0.0799356	0	0	0.0239503	0
Tac4	0	0	0.032511	0	0.0368498	0	0	0.0663819	0
B130006D01Rik	0	0.0136182	0	0.0135694	0	0	0	0.011853	0.0116352
Igf2bp1	0	0	0.0085636	0.00997852	0	0	0	0.00435775	0
Mir3063	0	0	0	0	0	0	0	0	0
Gip	0	0	0	0	0	0	0	0	0
Ttll6	0	0	0	0.013489	0	0	0	0	0
Hoxb13	0	0	0	0	0	0	0	0	0
Gm11538	0	0	0	0	0	0	0	0	0
Gm53	0	0	0	0	0	0	0	0	0
Mir196a-1	0	0	0	0	0	0	0	0	0
Mir10a	0	0	0	0	0	0	0	0	0
Hoxb1	0	0.0215214	0	0	0	0	0	0	0
Gm11529	0	0	0	0	0	0	0	0	0.0184973
Mir152	0	0	0	0	0	0	0	0	0
Prr15l	0	0	0	0	0.799727	0.291822	0	0.0299921	0.0292445
Mir8103	0	0	0	0	0	0	0	0	0
Mir7235	0	0	0	0	0	0	0	0	0
2410003L11Rik	0	0	0	0.0923524	0.177419	0.0984101	0	0.242235	0.154579
Mir6927	0	0	0	0	0	0	0	0	0
Mir8102	0	0	0	0	0	0	0	0	0
Mir5119	0	0	0	0	0	0	0	0	0
Neurod2	0	0	0	0.0138025	0	0	0	0	0
1700003D09Rik	0	0	0	0	0	0	0	0	0
Gm12	0	0	0.0954562	0	0	0	0	0	0
Gsdma3	0	0	0	0	0	0	0	0	0
Gsdma2	0	0	0	0	0	0	0	0	0
Gsdma	0	0.0160727	0	0.0160204	0.046811	0	0	0.0279889	0
Csf3	0	0	0	0	0.0332942	0	0	0	0
Gjd3	0	0	0	0	0	0	0	0	0
Krt24	0	0	0	0	0	0	0	0	0
Krt25	0	0	0	0	0	0	0	0	0
Krt26	0	0	0	0	0	0	0	0	0
Krt27	0	0	0	0	0	0	0	0	0
Krt12	0	0	0	0	0	0	0	0	0
Krt20	0	0	0.0797234	0	0.0452481	0	0	0	0.0795347
Krt39	0	0	0	0	0	0	0	0	0
Krt40	0	0	0	0	0	0	0	0	0
Krtap3-3	0	0	0	0	0	0	0	0	0
Krtap3-2	0	0	0	0	0	0	0	0	0
Krtap3-1	0	0	0	0	0	0	0	0	0
Krtap1-5	0	0	0	0	0	0	0	0	0
Krtap1-4	0	0	0	0	0	0	0	0	0
Krtap1-3	0	0	0	0	0	0	0	0	0
Krtap9-3	0	0	0	0	0	0	0	0	0
Gm11938	0	0	0	0	0	0	0	0	0
Gm11937	0	0	0	0	0	0	0	0	0
Krtap2-4	0	0	0	0	0	0	0	0	0
Gm11562	0	0	0	0	0	0	0	0	0
Krtap4-1	0	0	0	0	0	0	0	0	0
Krtap4-2	0	0	0	0	0	0	0	0	0
Krtap4-7	0	0	0	0	0	0	0	0	0
Gm11563	0	0	0	0	0	0	0	0	0
Krtap4-6	0	0	0	0	0	0	0	0	0
Gm11595	0	0	0	0	0	0	0	0	0
Krtap4-8	0	0	0	0	0	0	0	0	0
Krtap4-9	0	0	0	0	0	0	0	0	0
Gm11596	0	0	0	0	0	0	0	0	0
Gm11554	0	0	0	0	0	0	0	0	0
Krtap4-13	0	0	0	0	0	0	0	0	0
Gm11569	0	0	0	0	0	0	0	0	0
Gm11564	0	0	0	0	0	0	0	0	0
2300003K06Rik	0	0	0	0	0	0	0	0	0
Krtap4-16	0	0	0	0	0	0	0	0	0
Gm11568	0	0	0	0	0	0	0	0	0
Gm11559	0	0	0	0	0	0	0	0	0
Krtap9-1	0	0	0	0	0	0	0	0.0807449	0
Gm11567	0	0	0	0	0	0	0	0	0
Krtap31-1	0	0	0	0	0	0	0	0	0
Gm11565	0	0	0	0	0	0	0	0	0
Krtap31-2	0	0	0	0	0	0	0	0	0
Krtap9-5	0	0	0	0	0	0	0	0	0
Krtap16-1	0	0	0	0	0	0	0	0	0
Krtap17-1	0	0	0	0	0	0	0	0	0
Krt33a	0	0	0	0	0	0	0	0	0
Krt33b	0	0	0	0	0	0	0	0	0
Krt34	0	0	0	0	0	0	0	0	0
Krt32	0	0	0	0	0	0	0	0	0
Krt35	0	0	0	0	0	0	0	0	0
Krt13	0	0.0715662	0	0.0357649	0.0347089	0	0	0	0
Krt15	0	0	0.0226223	0	0.0513423	0.224409	0	0	0
Krt9	0	0	0	0.0339806	0	0	0	0	0
Krt16	0	0	0	0	0.0285048	0	0	0	0
Krt17	0	0.0305552	0	0	2.01584	0.940293	0	0	0
Krt42	0	0.0297607	0	0	0.0288749	0	0	0.0259661	0
Gast	0	0	0	0	0	0	0	0	0
Mir7116	0	0	0	0	0	0	0	0	0
Hcrt	0	0.0977711	0	0	0	0	0	0	0
Mir6928	0	0	0	0	0	0	0	0	0
G6pc	0	0	0	0	0.0768189	0	0	0.0172366	0
Mir6929	0	0	0	0	0	0	0	0	0
LOC666331	0	0	0	0	0	0	0	0	0
4930417O22Rik	0	0	0.034487	0	0.0390805	0	0	0	0
Sost	0	0.0216458	0.0925252	0.0215922	0	0	0	0	0.0554048
1700006E09Rik	0	0	0	0	0	0	0	0	0
Ppy	0	0	0	0	0	0	0	0	0
Pyy	0	0	0	0	0	0	0	0	0
Nags	0	0	0	0.0210487	0	0	0	0	0
Mir8101	0	0	0	0	0	0	0	0	0
BC030867	0	0	0.0443798	0.017255	0	0	0.0161276	0	0.029557
Slc4a1	0	0.0375627	0.0481354	0.0280544	0.0547161	0.0595544	0.139775	0.0326729	0.313134
Bloodlinc	0	0	0.0686989	0	0	0	0	0	0
Mir6930	0	0	0	0	0	0	0	0	0
Gm1564	0	0.00933324	0.00797347	0.00929421	0	0	0.00868238	0.00811821	0.0239401
Fam187a	0	0	0	0.0293796	0	0	0	0	0
Gfap	0	0	0.0275693	0	0.0156586	0.0341394	0.0908763	0	0.0288647
Kif18b	0	0.0129831	0.19969	0	0.037818	0.013732	0.0483471	0.0112991	0.0110938
2410004I01Rik	0	0	0.0445828	0	0	0	0	0	0
Mir6931	0	0	0	0	0	0	0	0	0
1700023F06Rik	0	0	0	0	0.0385535	0	0.0372134	0.0347374	0
Spata32	0	0	0	0	0	0	0	0	0
Gm884	0	0	0	0	0	0	0	0	0.00798185
Lyzl6	0	0	0	0	0	0	0	0	0
1700072I22Rik	0	0	0	0.066548	0	0	0	0.0581664	0
Rprml	0	0	0	0.272055	0.307488	0.433881	0.254753	0.832059	1.7324
Wnt3	0	0	0.0238499	0	0	0	0	0	0
Crhr1	0	0	0	0	0	0	0	0	0
Sppl2c	0	0	0	0	0	0	0	0	0
Efcab3	0	0	0	0	0	0.0276234	0	0	0
2019-03-10	0	0	0	0	0	0	0	0	0
Gm11651	0	0	0	0	0	0	0	0	0
Ace3	0	0	0	0	0	0	0	0	0
Kcnh6	0	0	0	0	0	0	0	0	0
Gh	0	0	0.14299	0	0	0	0	0	0
Snord104	0	0	0	0	0	0	0	0	0
Mir3064	0	1145.87	1209.32	1827.19	0	0	1608.31	1362.38	0
Mir6932	0	0	0	0	0	0	0	0	0
Mir7223	0	0	0	0	0	0	0	0	0
E030025P04Rik	0	0	0	0	0	0	0	0	0
1700096J18Rik	0	0	0.121673	0	0	0	0.405487	0	0.118184
1700012B07Rik	0	0	0	0	0	0	0	0	0
1700023C21Rik	0	0	0	0	0	0	0	0	0
Gm11681	0	0.0682767	0	0	0	0	0	0.0510359	0
1700012H19Rik	0	0	0	0	0	0	0	0	0
Sstr2	0	0	0	0	0	0	0	0	0
Cpsf4l	0	0.194818	0.029048	0.101787	0.264521	0.0721085	0.136779	0.238281	0.202364
1700092K14Rik	0	0	0	0	0	0	0	0	0
Mir466n	0	0	0	0	0	0	0	0	0
4932435O22Rik	0	0.0127186	0.0108677	0	0	0	0	0	0
Gpr142	0	0	0	0	0	0	0	0	0
Cd300c	0	0	0.133996	0	0	0	0	0.0686612	0
Otop2	0	0	0	0	0	0	0	0	0
Ush1g	0	0.0136408	0.0466251	0.0543675	0	0	0	0	0
Otop3	0	0	0	0	0	0	0	0	0
Mir3968	0	0	0	0	0	0	0	0	0
Mir5621	0	0	0	0	0	0	0	0	0
Smim6	0	0	0.260563	0.101589	0.0491601	0.0540198	0	0.044389	0.0430546
Foxj1	0	0.0170575	0.0728935	0	0.0331181	0.0361103	0.0158931	0	0
Qrich2	0	0	0	0	0	0	0	0	0
Aanat	0	0.0346067	0.0296067	0	0	0	0	0.0302158	0
Snord1a	0	0	0	0	0	0	0	0	0
Snord1c	0	0	0	0	0	0	0	0	0
Snord1b	0	0	0	0	0	0	0	0	0
Mgat5b	0	0.0100701	0.0086033	0	0.0195576	0.0532259	0	0.00876008	0.00860894
Mir6516	0	0	0	0	17.776	22.2532	0	0	0
Gm11729	0	0	0	0	0	0	0	0	0
Gm11733	0	0	0	0.0191233	0.0186152	0	0	0	0
2900041M22Rik	0	0.0348745	0.149182	0.0348523	0.169144	0.0740743	0.0978394	0.0609028	0.148437
6030468B19Rik	0	0.0450084	0.115585	0	0.0436395	0	0.042178	0	0
Tmem235	0	0	0	0	0	0	0	0	0
Mir6933	0	0	0	0	0	0	0	0	0
BC100451	0	0	0	0.0452844	0.0220264	0.0240477	0	0.0197803	0.03872
Rbfox3	0	0	0.0264652	0	0.015089	0	0	0	0.119491
Enpp7	0	0	0	0	0	0	0	0	0
Mir6934	0	0	0	0	0	0	0	0	0
Card14	0	0	0.0185494	0.0108123	0.0105411	0	0.0202031	0.0472219	0.0649536
Mir1932	0	0	0	0	0	0	0	0	0
Gm11762	0	0	0	0	0	0	0	0	0
Rptoros	0	0.0406961	0	0	0	0	0	0	0.069217
Mir338	0	0	0	0	0	0	0	0	0
Mir3065	0	0	0	0	0	0	0	0	0
Tspan10	0	0	1.40786	0	0	0	0	0.0377655	0
Mir6936	0	0	0	0	0	0	0	0	0
Sectm1b	0	0	0	0	0.0185205	0	0	0	0.032572
Sectm1a	0	0	0.145562	0	0.0550494	0	0	0	0.0241751
Tex19.2	0	0	0	0	0	0	0	0	0.0373273
Tex19.1	0	0	0	0	0.0253621	0.0554229	0.0243973	0	0.11141
Mir7236	0	0	0	0	0	0	0	0	0
Ptchd3	0	0	0	0	0	0	0	0	0
Dnmt3aos	0	0	0	0	0	0	0	0	0
1700101O22Rik	0	0	0	0	0	0	0	0	0
Apob	0	0	0	0	0	0	0	0.00520905	0
Gdf7	0	0	0.0285067	0	0.0323262	0	0	0	0.0283743
Slc7a15	0	0.023618	0.0381935	0.0441133	0.0865241	0.0474717	0	0	0
Matn3	0	0	0	0	0	0	0	0	0
1700022H16Rik	0	0	0	0	0	0	0	0	0
Gm38407	0	0	0	0	0	0	0	0	0
7420701I03Rik	0	0	0	0	0	0	0	0	0
Msgn1	0	0	0	0	0	0	0	0	0
Mir7675	0	0	0	0	0	0	0	0	0
4930511A02Rik	0	0	0	0	0	0	0	0	0
Rad51ap2	0	0	0.0233745	0.0408841	0	0	0.0891421	0.0119043	0.0233706
4921511I17Rik	0	0	0.0299125	0	0.0339149	0	0	0	0
Gm16497	0	0	0	0	0	0	0	0	0
4930448C13Rik	0	0	0	0	0	0	0	0	0
Mir6387	0	0	0	0	0	0	0	0	0
Mir3066	0	0	0	0	0	0	0	0	0
Gm29687	0	0	0	0	0	0	0	0	0
4930480M12Rik	0	0	0	0	0	0	0	0	0
4930549C15Rik	0	0	0	0	0	0	0	0	0
Mir6538	0	0	0	0	0	0	0	0	0
Gm9866	0	0	0	0	0	0	0	0	0
Allc	0	0	0	0	0.0308322	0	0	0	0
Mir6937	0	0	0	0	0	0	0	0	0
Myt1l	0	0.0356083	0	0	0	0.0188039	0.00551309	0.0154763	0.0050736
C630031E19Rik	0	0	0	0	0	0	0	0	0
Tpo	0	0	0	0	0	0	0	0	0
2310016D03Rik	0	0	0	0	0	0.0315761	0	0.0519323	0
Slc26a3	0	0	0	0	0	0	0.0139667	0.0130551	0
Slc26a4	0	0	0.0120557	0	0	0	0	0	0
Gpr22	0	0	0	0	0.00904311	0	0	0	0
Cdhr3	0	0.0295303	0.0126179	0.029429	0.0286703	0.0312441	0.0550032	0.0128535	0.0630629
Efcab10	0	0	0	0	0	0	0	0	0
Ferd3l	0	0	0	0	0	0	0	0	0
Prps1l1	0	0	0	0	0.0264166	0	0	0	0
Agr3	0	0	0	0	0	0	0	0	0
Agr2	0	0.0689667	0	0.0692519	0	0	0	0	0
Lrrc72	0	0	0	0	0	0	0	0	0
Mir3472	0	0	0	0	0	0	0	0	0
Mir5099	0	0	0	0	0	0	0	0	0
4930428E07Rik	0	0	0	0	0	0	0	0	0
Mir1938	0	0	0	0	0	0	0	0	0
Gm7008	0	0	0	0	0	0	0	0	0
Mir5627	0	0	0	0	0	0	0	0	0
Mir5125	0	0	0	0	0	0	0	0	0
Foxg1	0	0	0	0	0.0104667	0	0.0100301	0.00937757	0
3110039M20Rik	0	0	0	0	0	0	0	0	0
1810007C17Rik	0	0	0	0	0	0	0	0	0
1700008C04Rik	0	0	0.055481	0	0	0	0	0	0.0548299
Gpr33	0	0	0.201506	0	0	0	0	0	0
1700031P21Rik	0	0	0	0	0	0	0	0	0
Npas3	0	0.00720744	0.0307833	0	0.0209996	0.022845	0.0134038	0	0.0184942
1700104L18Rik	0	0	0	0	0	0	0	0	0
Gm7550	0	0	0	0	0	0	0	0	0
Mir1198	0	0	0	0	0	0	0	0	0
Gm19990	0	0	0	0	0	0	0	0	0
E030019B13Rik	0	0	0	0	0	0	0	0	0
C87198	0	0	0.0829258	0	0	0.103766	0	0	0
Nkx2-9	0	0	0	0.037672	0	0	0	0	0
Foxa1	0	0	0.0931268	0	1.64011	0.360257	0	0	0
4921506M07Rik	0	0	0.0535424	0	0.0303644	0.0332167	0	0	0
BC042761	0	0	0	0	0	0	0	0	0
Sstr1	0	0	0.0189951	0	0.0107941	0	0.0103447	0.00967155	0.0285044
Mia2	0	0	0	0	0	0	0	0.0490496	0.0958466
Gm20063	0	0	0	0	0	0	0	0	0
Lrfn5	0	0	0.00987891	0	0	0	0	0	0
Spanxn4	0	0	0	0	0	0	0	0	0
Fscb	0	0	0	0	0	0	0	0	0
Mis18bp1	0	0.021384	0.228375	0	0.020765	0.0226079	0.0497459	0.04651	0.0274191
Rpl10l	0	0	0	0	0	0	0	0	0
Lrr1	0	0.0307835	0.131652	0	0.029866	0	0	0	0
Mir681	0	0	0	0	0	0	0	0	0
4930512B01Rik	0	0.0327405	0	0	0	0	0	0	0
4931403G20Rik	0	0.026727	0	0	0	0	0	0	0
Abhd12b	0	0	0	0	0	0	0	0	0
F730035M05Rik	0	0.0363514	0.0311026	0	0.0705185	0	0.136019	0.0317481	0.0309368
Mir466o	0	0	0	0	0	0	0	0	0
Tomm20l	0	0	0	0	0	0	0	0	0
4930404H11Rik	0	0	0.0584297	0	0.0660276	0	0	0.0598233	0.115398
Ccdc175	0	0	0	0	0	0.0176734	0.015557	0	0.0142589
Six6	0	0	0	0	0	0	0	0	0
D830013O20Rik	0	0.234807	0	0.31478	0.0757777	0.251408	0	0.0687932	0
Syt16	0	0	0	0.0161531	0	0.0171505	0	0	0
1700086L19Rik	0	0	0	0	0	0	0	0	0
Dbpht2	0	0.0145462	0	0	0	0	0	0	0
Kcnh5	0	0	0	0	0	0	0	0	0
Gphb5	0	0	0	0	0	0	0	0	0
Mir5101	0	0	0	0	0	0	0	0	0
Esr2	0	0	0.04684	0	0	0	0	0	0
Tex21	0	0	0	0	0	0	0	0	0
Ppp1r36	0	0	0	0.0318952	0.0619507	0.03389	0.0298402	0	0
Mir5135	0	0	0	0	0	0	0	0	0
AI463170	0	0.109169	0	0	0	0	0	0.19281	0
Gpx2	0	0	0	0	0	0	0	0	0
Fam71d	0	0	0.044546	0.0259914	0.0252718	0	0	0	0.0222022
Mir1843a	0	0	0	0	0	0	0	0	0
Scarna3b	0	0	0	0	0	0	0	0	0
2310002D06Rik	0	0	0.102536	0	0	0	0	0	0.100089
Plekhd1os	0	0	0	0	0	0	0.049812	0	0
Plekhd1	0	0	0.0104636	0.0121998	0.0594537	0.0129507	0.0113989	0.0106565	0.0209306
Ccdc177	0	0	0	0	0	0.0102802	0	0	0
1700052I22Rik	0	0	0	0	0	0	0	0	0
Mir3067	0	0	0	0	0	0	0	0	0
Adam21	0	0	0	0	0	0	0	0.0130503	0
1700085C21Rik	0	0	0	0	0	0	0	0	0
Vsx2	0	0	0	0	0	0	0	0	0
Vrtn	0	0	0	0	0	0	0	0	0
Syndig1l	0	0	0.0904328	0	0	0.0186676	0	0	0
D030025P21Rik	0	0	0.176405	0	0.0105522	0	0.0101122	0	0.00928886
Mir6938	0	0	0	0	0	0	0	0	0
Gm805	0	0	0	0.0136964	0.0133458	0	0	0	0
Lrrc74a	0	0	0.0197186	0	0	0	0	0	0
Zdhhc22	0	0	0	0	0	0	0	0	0.0554329
Tmem63c	0	0.0129954	0	0	0	0.0137451	0	0.0113099	0
Ngb	0	0	0.0242106	0.028304	0.0824812	0.0600995	0.0529195	0.024689	0.120793
Mir3068	0	0	0	0	0	0	0	0	0
Oog1	0	0	0	0	0	0	0	0	0
Gm16381	0	0	0	0	0	0	0	0	0
Gm1995	0	0	0	0.00981987	0	0	0	0	0
Gm2016	0	0.0256958	0.0219724	0.0256466	0.0748064	0	0.0719529	0.0448116	0.153359
Gm2042	0	0	0	0	0	0	0	0	0
Gm10436	0	0	0	0	0	0	0	0	0
Gm5662	0	0	0	0	0	0	0	0	0
Gm7104	0	0	0	0	0	0	0.00948539	0	0
3200001D21Rik	0	0	0.0166092	0	0.0565826	0.0411523	0.0181131	0.0507804	0.0165846
Nrxn3	0	0.0082706	0.00706523	0	0.0963877	0.0349613	0.00769245	0	0.00707302
5430427M07Rik	0	0	0	0	0	0	0	0	0
Mir669c	0	0	0	0	0	0	0	0	0
4930559C10Rik	0	0	0	0	0	0	0	0	0
1700019M22Rik	0	0	0	0	0	0	0	0	0
Kcnk10	0	0	0	0	0.0168732	0.036798	0.0323918	0	0.0296813
4930474N09Rik	0	0	0	0	0	0	0	0	0
Mir1190	0	0	0	0	0	0	0	0	0
Kif4-ps	0	0	0	0	0	0	0	0	0
Catsperb	0	0	0	0	0	0	0	0	0
Mir1936	0	0	0	0	0	0	0	0	0
Cox8c	0	0	0	0	0	0	0	0	0
Unc79	0	0.00946336	0.00808255	0	0.0229795	0.00499695	0.00439757	0	0.0161955
Fam181a	0	0	0	0	0	0	0	0	0
Serpina10	0	0	1.6322	0	0	0	0.0299784	0	0
Serpina6	0	0	0	0.0316733	0	0	0	0	0
Serpina1f	0	0	0	0	0	0	0	0	0
Serpina1e	0	0.238272	1.48513	0.238093	0.231137	0.108432	0.0636526	0.0891543	0.289802
Serpina9	0	0	0.046014	0.026857	0	0	0	0	0
Serpina4-ps1	0	0	0	0	0	0	0	0	0
Serpina5	0	0	0	0	0	0	0	0	0
Serpina3b	0	0.0432009	0.0923309	0.0215468	0.0838602	0.0686495	0.0402895	0.0188232	0.147437
Serpina3i	0	0.0202919	0.104077	0	0.0393923	0	0	0	0.0519513
Serpina3j	0	0.112178	0.0383621	0.0671474	0.0217748	0.0237716	0.0837087	0.0391068	0.229674
Gsc	0	0.162945	0.0348629	0.244462	0.632076	0.12993	0.381409	0.0712027	0.692849
Mir3069	0	0	0	0	0	0	0	0	0
Tcl1b2	0	0	0	0	0	0	0.045651	0	0
Tcl1b1	0	0	0	0	0	0	0	0	0
Tcl1b5	0	0	0	0	0	0	0	0	0
Tcl1b3	0	0	0	0	0	0	0	0	0
Tcl1b4	0	0	0	0	0	0	0	0	0
Tunar	0	0	0	0	0	0	0	0	0
Gm2721	0	0	0	0	0	0	0	0	0
AU015791	0	0.0509028	0	0	0	0	0.0477598	0.0445548	0
Bdkrb1	0	0.0350525	0.149945	0	0	0	0.0655616	0.0306077	0.029838
1700121N20Rik	0	0	0	0	0	0	0	0	0
4933406K04Rik	0	0	0	0	0	0	0	0	0
4930465M20Rik	0	0	0	0	0	0	0	0	0
Mir342	0	0	0	0	0	0	0	0	0
Mir345	0	0	0	0	0	0	0	0	0
Mir1906-1	0	0	0	0	0	0	0	0	0
Mir770	0	0	0	0	0	0	0	0	0
Mir673	0	0	0	0	0	0	0	0	0
Mir493	0	0	0	0	0	0	0	0	0
Mir337	0	0	0	0	0	0	0	0	0
Mir3544	0	0	0	0	0	0	0	0	0
Mir540	0	0	0	0	0	0	0	0	0
Mir665	0	0	0	0	0	0	0	0	0
Mir3070a	0	0	0	0	0	0	0	0	0
Mir3070b	0	0	0	0	0	0	0	0	0
Rtl1	0	0	0.0138773	0	0	0.0257499	0.00755422	0	0
Mir3071	0	0	0	0	0	0	0	0	0
Mir431	0	0	0	0	0	0	0	0	0
6430411K18Rik	0	0.0357521	0.0305887	0	0	0.0379754	0.0334399	0.0312219	0.0304299
Mir433	0	0	0	0	0	0	0	0	0
Mir127	0	0	0	0	0	0	0	0	0
Mir434	0	0	0	0	0	0	0	0	0
Mir432	0	0	0	0	0	0	0	0	0
Mir136	0	0	0	0	0	0	0	0	0
Mir341	0	0	0	0	0	0	0	0	0
Mir1188	0	0	0	0	0	0	0	0	0
Mir370	0	0	0	0	0	0	0	0	0
AF357425	0	0	0	0	0	0	0	0	0
AF357426	0	0	0	0	0	0	0	0	0
DQ267100	0	0	0	0	0	0	0	0	0
AF357359	0	0	0	0	0	0	0	0	0
DQ267101	0	0	0	0	0	0	0	0	0
AF357355	0	0	0	0	0	0	0	0	0
DQ267102	0	0	0	0	0	0	0	0	0
Mir882	0	0	0	0	0	0	0	0	0
Mir379	0	0	0	0	0	0	0	0	0
Mir411	0	0	0	0	0	0	0	0	0
Mir299a	0	0	0	0	0	0	0	0	0
Mir299b	0	0	0	0	0	0	0	0	0
Mir380	0	0	0	0	0	0	0	0	0
Mir1197	0	0	0	0	0	0	0	0	0
Mir323	0	0	0	0	0	0	0	0	0
Mir758	0	0	0	0	0	0	0	0	0
Mir329	0	0	0	0	0	0	0	0	0
Mir494	0	0	0	0	0	0	0	0	0
Mir679	0	0	0	0	0	0	0	0	0
Mir1193	0	0	0	0	0	0	0	0	0
Mir666	0	0	0	0	0	0	0	0	0
Mir543	0	0	0	0	0	0	0	0	0
Mir495	0	0	0	0	0	0	0	0	0
Mir667	0	0	0	0	0	0	0	0	0
Mir376c	0	0	0	0	0	0	0	0	0
Mir654	0	0	0	0	0	0	0	0	0
Mir376b	0	0	0	0	0	0	0	0	0
Mir376a	0	0	0	0	0	0	0	0	0
Mir300	0	0	0	0	0	0	0	0	0
Mir381	0	0	0	0	0	0	0	0	0
Mir487b	0	0	0	0	0	0	0	0	0
Mir539	0	0	0	0	0	0	0	0	0
Mir544	0	0	0	0	0	0	0	0	0
Mir382	0	0	0	0	0	0	0	0	0
Mir134	0	0	0	0	0	0	0	0	0
Mir668	0	0	0	0	0	0	0	0	0
Mir485	0	0	0	0	0	0	0	0	0
Mir412	0	0	0	0	0	0	0	0	0
Mir369	0	0	0	0	0	0	0	0	0
Mir410	0	0	0	0	0	0	0	0	0
Mir453	0	0	0	0	0	0	0	0	0
Mir154	0	0	0	0	0	0	0	0	0
Mir496a	0	0	0	0	0	0	0	0	0
Mir377	0	0	0	0	0	0	0	0	0
Mir541	0	0	0	0	0	0	0	0	0
Mir409	0	0	0	0	0	0	0	0	0
Mir3072	0	0	0	0	0	0	0	0	0
3110009F21Rik	0	0	0	0	0	0	0	0	0
Mir1247	0	0	0	0	0	0	0	0	0
Dio3	0	0.0241589	0.0413128	0	0.0937827	0.0256058	0.0225427	0.0631825	0.123621
4930595D18Rik	0	0	0	0	0	0	0	0	0
A230065H16Rik	0	0	0	0	0	0	0	0	0
Snora28	0	18.2276	0	11.6495	9.17777	35.8302	0	0	0
Rd3l	0	0	0	0	0	0	0	0	0
Mir3073a	0	0	0	0	0	0	0	0	0
Mir3073b	0	0	0	0	0	0	0	0	0
Mir203	0	0	0	0	0	0	0	0	0
A730018C14Rik	0	0	0	0	0	0	0	0	0
B020018J22Rik	0	0	0	0	0	0	0	0	0
Mir6939	0	0	0	0	0	0	0	0	0
Mir6940	0	0	0	0	0	0	0	0	0
Mir6941	0	0	0	0	0	0	0	0	0
Tex22	0	0	0.031921	0	0	0	0	0	0
Tmem121	0	0	0.049028	0.0286203	0.0278116	0	0.053541	0	0.0244261
Adam6b	0	0	0.0334076	0	0	0	0	0	0
Adam6a	0	0	0.0150207	0	0	0	0	0	0
Mir7094-1	0	0	0	0	0	0	0	0	0
Mir7094-2	0	0	0	0	0	0	0	0	0
Mir6388	0	0	0	0	0	0	0	0	0
Gm10421	0	0	0	0	0	0	0	0	0
Gm5441	0	0	0	0	0	0	0	0	0
Mir153	0	0	0	0	0	0	0	0	0
D230030E09Rik	0	0	0	0	0	0	0	0	0
Sp8	0	0	0	0	0	0.0201739	0	0	0
Abcb5	0	0	0	0	0	0	0	0	0
Itgb8	0	0.0280907	0.0960181	0.0559831	0	0.133726	0.0915497	0.0366767	0.0239984
Macc1	0	0.0112773	0	0	0.153308	0.0476963	0	0	0
Speer6-ps1	0	0	0	0	0	0	0	0	0
2810429I04Rik	0	0	0.251232	0	0	0	0.184815	0	0
1700024F13Rik	0	0	0	0	0	0.0871631	0.07682	0	0
Calml3	0	0	0	0.0325799	0.0949091	0.138475	0	0.170792	0.194399
Calm4	0	0	0	0	0	0	0	0	0
Calm5	0	0	0	0	0	0	0	0	0
Tubal3	0	0	0	0	0	0	0.0130785	0	0
Ucn3	0	0	0	0	0	0	0	0	0
Marcksl1-ps4	0	0	0	0	0	0	0	0	0
Akr1c6	0	0	0	0	0	0	0	0	0
Akr1c20	0	0	0	0	0	0	0	0.031469	0
Akr1c21	0	0	0	0	0	0	0	0	0
1700016G22Rik	0	0	0	0	0	0	0	0	0
Idi2	0	0	0.0677155	0	0	0	0.0184628	0	0.0338047
Zp4-ps	0	0	0	0	0	0	0	0	0
Edaradd	0	0.00518873	0.203861	0	0.0100795	0.0109602	0.0144684	0.0225522	0.0133188
Prl2c4	0	0	0	0	0	0	0	0	0
Prl2c3	0	0	0	0	0	0	0	0	0
Prl2c2	0	0	0	0	0	0	0	0	0
Prl2c5	0	0	0	0	0	0	0	0	0
Gng4	0	0	0.0256111	0	0.0145473	0	0.0279117	0.0260899	0.0511996
Hecw1	0	0	0	0	0	0	0	0	0
4933412O06Rik	0	0	0	0	0	0	0	0	0
A530046M15Rik	0	0	0	0	0	0	0	0	0
Mir466i	0	0	0	11.6495	0	0	0	0	0
4930448F12Rik	0	0	0	0	0	0	0	0	0
Pou6f2	0	0	0	0	0	0	0	0	0
9330199G10Rik	0	0	0	0	0	0	0	0	0
Nme8	0	0	0	0	0	0	0	0	0
Olfr1370	0	0	0	0	0	0	0	0	0
Olfr263	0	0.0520605	0	0	0	0	0	0	0
Olfr1368	0	0	0	0	0	0	0	0	0
Olfr1367	0	0	0	0	0	0	0	0	0
Mir6942	0	0	0	0	0	0	0	0	0
Mir1896	0	0	0	0	0	0	0	0	0
Zfp389	0	0	0	0	0	0.0569198	0	0.0935348	0.181288
Olfr1366	0	0	0	0	0	0	0	0	0
Olfr1535	0	0	0	0	0	0	0	0	0
Olfr1364	0	0	0	0	0	0	0	0	0
Olfr1362	0	0	0	0	0.0485636	0.0533568	0	0	0
Olfr11	0	0	0	0	0	0	0	0	0
Olfr1361	0	0	0	0	0	0	0	0	0
Olfr1360	0	0	0	0	0	0	0	0	0
Olfr1359	0	0	0	0	0	0	0	0	0
Hist1h1b	0	0	0.167766	0	0	0	0	0.11448	0.0552592
Mir1983	0	0	0	0	0	0	0	0	0
Pom121l2	0	0	0	0	0.0224589	0	0	0	0
Hist1h2ag	0	0	0	0	0.128607	0.144056	0.254175	0.472058	0.445871
Vmn1r188	0	0	0	0	0	0	0	0	0
Vmn1r189	0	0	0	0	0	0	0	0	0
Vmn1r191	0	0	0	0	0	0	0	0	0
Vmn1r192	0	0	0	0	0	0	0	0	0
Vmn1r193	0	0	0	0	0	0	0	0	0
Vmn1r194	0	0	0	0	0	0	0	0	0
Vmn1r195	0	0	0	0	0	0	0	0	0
Vmn1r196	0	0	0	0	0	0	0	0	0
Vmn1r197	0	0	0	0	0	0	0	0	0
Vmn1r198	0	0	0	0	0	0	0	0	0
Vmn1r199	0	0	0	0	0	0	0	0	0
Vmn1r200	0	0	0	0	0	0	0	0	0
Vmn1r-ps103	0	0	0	0	0	0	0	0	0
Vmn1r201	0	0	0	0	0	0	0	0	0
Vmn1r202	0	0	0	0	0	0	0	0	0
Vmn1r203	0	0	0	0	0	0	0	0	0
Vmn1r204	0	0	0	0	0	0	0	0	0
Vmn1r205	0	0	0	0	0	0	0	0	0
Vmn1r206	0	0	0	0	0	0	0	0	0
Vmn1r207-ps	0	0	0	0	0	0	0	0	0
Vmn1r208	0	0	0	0	0	0	0	0	0
Vmn1r209	0	0	0	0	0	0	0	0	0
Vmn1r210	0	0	0	0	0	0	0	0	0
Vmn1r211	0	0	0	0	0	0	0	0	0
Vmn1r212	0	0	0	0	0	0	0	0	0
Vmn1r213	0	0	0	0	0	0	0	0	0
Vmn1r214	0	0	0	0	0	0	0	0	0
Vmn1r215	0	0	0	0	0	0	0	0	0
Vmn1r216	0	0	0	0	0	0	0	0	0
Vmn1r217	0	0	0	0	0	0	0	0	0
Vmn1r218	0	0	0	0	0	0	0	0	0
Vmn1r219	0	0	0	0	0	0	0	0	0
Vmn1r220	0	0	0	0	0	0	0	0	0
Vmn1r221	0	0	0	0	0	0	0	0	0
Vmn1r222	0	0	0	0	0	0	0	0	0
Vmn1r223	0	0	0	0	0	0	0	0	0
4930557F10Rik	0	0	0	0	0	0	0	0	0
4933404K08Rik	0	0	0	0	0	0	0	0	0
4930586N03Rik	0	0	0	0	0	0	0	0	0
Btn1a1	0	0	0	0	1.36377	0.278519	0	0	0.0107164
Btn2a2	0	0	0	0	0.0289592	0	0	0	0
Hist1h3g	0	0.250145	0.430195	0.126585	0.120844	0.135107	0.595872	0.221434	0.209692
Hist1h3f	0	0.222586	0.0953268	0.0557726	0.107858	0.0593278	0.156786	0.048742	0.141605
Hist1h4f	0	0.210462	0.181805	0.215554	0.202687	0.231042	0	0	0.173984
Hist1h2ae	0	0.2084	0.178992	0.420599	0.403074	0.22423	0.395418	0.183894	0.262974
Hist1h3d	0	0.120678	0.311234	0.244123	0.11662	0.260502	0.114882	0.106755	0.202475
Hist1h4d	0	0.200304	0.518819	0.409734	0.385936	0.219474	0	0.179326	0.663404
Hist1h1t	0	0	0	0	0	0	0	0	0.0608851
Hist1h3c	0	0	0	0	0	0	0	0	0.108721
Hist1h3b	0	0	0	0	0	0	0	0	0
Hist1h3a	0	0.121389	0.10436	0	0	0	0	0	0
Hist1h1a	0	0.070743	0.181937	0	0.068514	0	0.0666482	0.0621074	0.0598523
Slc17a2	0	0	0	0	0	0	0.0136478	0	0
Slc17a3	0	0	0	0	0	0	0	0	0
Slc17a1	0	0	0	0	0.0222796	0	0	0	0
Slc17a4	0	0	0	0	0	0	0	0	0
Hist1h2aa	0	0	0	0	0	0	0	0	0
Scgn	0	0	0	0	0	0	0	0	0
Gm11346	0	0.0432599	1.74031	0	0	0	0	0	0.0735452
4932702P03Rik	0	0	0	0	0	0	0	0	0
Dcdc2a	0	0.0245227	0.0104731	0.0122047	0.0119088	0	0	0.00533	0
Gm11351	0	0	0	0	0	0	0	0	0
1700092E19Rik	0	0	0	0	0	0	0	0	0
Hdgfl1	0	0	0	0	0	0	0	0	0
Mir3970	0	0	0	0	0	0	0	0	0
Prl	0	0	0	0	0	0	0	0	0
Prl3d1	0	0	0	0	0	0	0	0	0
Prl3d2	0	0	0	0	0	0	0	0	0
Prl3d3	0	0	0	0	0	0	0	0	0.0570461
Prl3c1	0	0	0	0	0	0	0	0	0
Prl3b1	0	0	0	0	0	0	0	0	0
Prl3a1	0	0	0	0	0	0	0	0	0
Prl6a1	0	0	0	0	0	0	0	0	0
Prl8a2	0	0	0	0	0	0	0	0	0
Prl2b1	0	0	0	0	0	0	0	0	0
Prl8a6	0	0	0	0	0	0	0	0	0
Prl8a8	0	0	0	0	0	0	0	0	0
Prl8a9	0	0	0	0	0	0	0	0	0
Prl8a1	0	0	0	0	0	0	0	0	0
Prl7b1	0	0	0	0	0	0	0	0	0
Prl7a1	0	0	0	0	0	0	0	0	0
Prl7a2	0	0	0	0	0	0	0	0	0
Prl7d1	0	0	0	0	0	0	0	0	0
Prl7c1	0	0	0	0	0	0	0	0	0
Prl2a1	0	0	0	0	0	0	0	0	0
Prl2c1	0	0	0	0	0	0	0	0	0
Prl4a1	0	0	0	0	0	0	0	0	0
Prl5a1	0	0	0	0	0	0	0	0	0
Mir6368	0	0	0	0	0	0	0	0	0
A330102I10Rik	0	0	0	0	0	0.0937368	0	0	0
4930519D14Rik	0	0	0	0	0	0	0	0	0
4930401O12Rik	0	0	0	0	0	0	0	0	0
1700018A04Rik	0	0	0	0	0	0	0	0	0
Serpinb9b	0	0.0233246	0.0997107	0	0.0679105	0.0247177	0.0217605	0	0.0198949
Serpinb1b	0	0	0.249166	0	0	0.0561748	0.0247285	0	0.0225815
Serpinb9c	0	0	0.0204404	0	0	0	0.0446246	0	0
Serpinb9d	0	0	0	0	0	0	0	0	0
Serpinb9e	0	0	0	0	0	0	0	0	0
Serpinb9f	0	0	0	0	0	0	0	0	0
Serpinb9g	0	0	0	0	0	0	0	0	0
Gm6093	0	0	0	0	0	0	0	0	0
Serpinb6d	0	0	0	0	0	0	0	0	0
Serpinb6e	0	0	0	0	0	0	0	0	0
4930447K03Rik	0	0	0	0.0473875	0.045891	0.0503882	0	0.0828198	0
Gm15908	0	0.0443782	0.0379875	0.0444088	0.129089	0.0472141	0	0	0.075432
Fam50b	0	0	0	0	0	0.0379754	0	0	0
1700011B04Rik	0	0	0	0	0	0	0	0	0
1700019C18Rik	0	0	0	0	0	0	0	0	0
4930579J19Rik	0	0	0	0	0	0	0	0	0
Ofcc1	0	0	0	0	0	0	0	0	0.0397862
Gm26688	0	0	0	0	0.028444	0	0	0	0
Gcm2	0	0	0	0	0	0	0	0	0
Gm5082	0	0	0	0	0	0	0	0	0
Gm20751	0	0	0.0318343	0	0	0	0	0.0324977	0.0316585
Gm5083	0	0	0.0677127	0	0	0	0	0	0
A330076C08Rik	0	0	0	0	0	0	0	0	0
1700029N11Rik	0	0	0	0	0	0	0	0	0
A930002C04Rik	0	0	0.0150207	0	0	0	0	0	0.0150047
G630093K05Rik	0	0	0.0316261	0	0	0	0	0	0
4931429P17Rik	0	0	0	0	0	0	0	0	0
A330048O09Rik	0	0	0	0	0	0	0	0	0
Mirlet7d	0	0	0	0	0	0	0	0	0
Mirlet7f-1	0	0	0	0	0	0	0	0	0
Mirlet7a-1	0	0	0	0	0	0	0	0	0
Barx1	0	0	0	0	0	0	0	0	0
Susd3	0	0.125943	2.6589	0.0839905	0.692072	0.401798	0.432486	0.0366946	0.285549
Gm906	0	0	0.0353317	0.0274662	0	0	0	0	0
Nutm2	0	0	0	0	0	0	0	0	0
Mir683-2	0	0	0	0	0	0	0	0	0
Gm904	0	0	0	0	0	0	0	0	0
Gm8765	0	0	0.0119493	0	0	0.0295855	0	0	0
4930518P08Rik	0	0	0	0	0	0	0	0	0
Nxnl2	0	0	0.105741	0	0	0.0875797	0	0	0.0350207
4921525O09Rik	0	0	0.101902	0	0	0	0	0	0
Gm2848	0	0	0.123853	0	0	0	0	0	0
Gm2762	0	0	0	0	0	0	0	0	0
9530014B07Rik	0	0	0	0	0.202424	0.148942	0	0	0
4930555G21Rik	0	0	0	0	0	0	0	0	0
Cdhr2	0	0	0	0	0	0	0	0	0
Sncb	0	0	0	0	0.0386652	0	0	0	0
Eif4e1b	0	0	0	0	0	0	0	0	0
Slc34a1	0	0	0.012064	0	0	0	0	0	0
Pfn3	0	0	0	0	0	0	0	0	0
Mir6943	0	0	0	0	0	0	0	0	0
Mir6944	0	0	0	0	0	0	0	0	0
Mir6945	0	0	0	0	0	0	0	0	0
4930550C17Rik	0	0	0	0	0	0	0	0.028809	0
Neurog1	0	0.05481	0	0	0	0	0	0	0
Gm10782	0	0	0	0	0	0	0	0	0.0799173
Il9	0	0	0	0	0	0	0	0	0
Lect2	0	0	0	0	0	0	0	0	0
Trpc7	0	0	0	0.0121192	0	0	0	0	0
Spock1	0	0.0365639	0.0078089	0.00910222	0	0.00966106	0	0.031802	0
Mir874	0	0	0	0	0	0	0	0	0
1700066J03Rik	0	0	0	0	0	0	0	0	0
Mir6369	0	0	0	0	0	0	0	0	0
4930455J16Rik	0	0	0	0	0	0	0	0	0
Spata31d1a	0	0	0.00855518	0	0	0	0	0	0
Spata31d1b	0	0	0.188031	0	0	0	0	0	0
Spata31d1d	0	0	0	0.0111994	0.0109177	0	0	0	0.0288305
BC051665	0	0	0	0	0	0	0	0	0
Ctsll3	0	0	0	0	0	0	0	0	0
Tpbpb	0	0	0	0	0	0	0	0	0
Tpbpa	0	0	0	0	0	0	0	0	0
Ctsj	0	0	0	0	0	0	0	0	0
Ctsq	0	0	0	0	0	0	0	0	0
Ctsr	0	0	0	0	0	0	0	0	0
Cts6	0	0	0	0	0	0	0	0	0
Cts8	0	0.0530389	0.030222	0.0176261	0.0171626	0.0374317	0	0	0.0150946
Cts8-ps	0	0	0	0	0	0	0	0	0
Cts7	0	0	0	0	0	0	0	0	0
Ctsm	0	0	0	0	0	0	0	0	0
Cts3	0	0	0	0	0	0	0	0	0
Mir713	0	0	0	0	0	0	0	0	0
Mir23b	0	0	0	0	0	0	0	0	0
Mir27b	0	0	0	0	0	0	0	0	0
Mir24-1	0	0	0	0	0	0	0	0	0
Mir3074-1	0	0	0	0	0	0	0	0	0
1700024I08Rik	0	0	0	0	0	0	0	0	0
1190003K10Rik	0	0	0	0	0	0	0	0	0
Cntnap3	0	0	0	0	0	0	0	0	0
Spata31	0	0	0	0	0	0	0	0	0
Spata31d1c	0	0	0	0	0	0	0	0	0
Olfr466	0	0	0	0	0	0	0	0	0
Nlrp4f	0	0	0.0104636	0	0	0	0	0.0106565	0.0104653
Gm10324	0	0	0.0200444	0	0	0	0	0.0613064	0.0199964
2410141K09Rik	0	0.0310153	0.100486	0	0.0300905	0	0	0	0
4933433G19Rik	0	0.0458601	0	0.0459012	0.0889273	0.146413	0	0	0.0389655
9430065F17Rik	0	0	0.0383603	0	0	0.103946	0.0980936	0.039188	0.0380823
Gm10037	0	0	0.0915887	0	0	0	0	0	0
BC048507	0	0	0	0	0	0	0.0895941	0	0.0797348
1700001L19Rik	0	0.0250399	0	0.0249897	0	0.0265439	0.0701068	0	0.0213516
1700084F23Rik	0	0	0	0	0	0	0	0	0
Gm3772	0	0	0	0	0	0	0	0	0
4930520P13Rik	0	0	0	0	0	0	0	0	0
1700100L14Rik	0	0	0	0	0	0	0	0	0
8030423J24Rik	0	0	0	0	0	0	0	0	0
Mir466f-4	0	0	0	0	0	0	0	0	0
Gm20554	0	0	0.0213898	0	0.0567386	0.0176403	0.00776269	0.00725867	0.0856489
Irx2	0	0.0716408	0.061233	0.0892829	1.26919	0.455058	0.0333811	0.109191	0.428144
D730050B12Rik	0	0	0	0	0	0	0	0	0
4930555K05Rik	0	0	0	0	0	0	0	0	0
Irx4	0	0	0	0	0.344462	0.0715372	0	0	0
D630045M09Rik	0	0	0	0	0	0	0	0	0
Tert	0	0.0126251	0.075514	0.025156	0.0490342	0	0.0235052	0.0109869	0.0323654
Zdhhc11	0	0	0	0	0	0	0	0	0
Slc9a3	0	0	0.0151305	0	0	0	0.0164962	0	0
Mir682	0	0	0	0	50.5814	0	66.6182	0	0
Gpr150	0	0	0	0	0	0.0220029	0	0	0
Pou5f2	0	0	0	0	0	0.0354949	0	0	0
Adgrv1	0	0	0.00550741	0.00213862	0	0.00680751	0.00998444	0.00186786	0.00184034
Mir3961	0	0	0	0	0	0	0	0	0
C130071C03Rik	0	0	0	0	0	0	0	0	0
Mir9-2	0	0	0	0	0	0	0	0	0
2810049E08Rik	0	0	0	0	0	0	0	0	0
Gm17750	0	0	0	0	0	0	0	0	0
Atp6ap1l	0	0	0	0	0	0	0	0	0
Ankrd34b	0	0	0	0	0.0317739	0	0	0.00948946	0.00932323
Spz1	0	0	0	0	0	0	0	0	0
Bhmt	0	0	0	0	0	0	0	0	0
Bhmt2	0	0	0	0	0	0	0	0	0
Dmgdh	0	0	0	0	0	0	0	0	0
AW495222	0	0	0	0	0	0	0	0	0
Mir5624	0	0	0	0	0	0	0	0	0
Otp	0	0	0	0	0	0.0429675	0	0	0
Snora47	0	0	0	0	0	9.29401	0	0	0
Crhbp	0	0.0271343	0	0	0	0	0	0	0
S100z	0	0	0	0	0	0	0	0	0
1700029F12Rik	0	0	0	0	0	0	0	0	0
Lincenc1	0	0.0129703	0.0221737	0.0129233	0.277236	0.274545	0.253734	0.112948	0.69868
Gm5086	0	0	0.0310751	0.0363036	0	0.0771642	0	0	0
2310005E17Rik	0	0	0	0	0	0	0	0	0
Tmem174	0	0	0	0	0	0	0	0	0
1700024P04Rik	0	0	0	0	0	0	0	0	0
2310020H05Rik	0	0.222546	0.318031	0	0	0	0.0699382	0	0
Cartpt	0	0.244732	0	0	0	0.130585	0	0	0.0518389
5930438M14Rik	0	0	0	0	0	0	0	0	0
4933416M06Rik	0	0	0	0	0	0	0	0	0
4922502H24Rik	0	0	0	0	0	0	0	0	0
1700099I09Rik	0	0	0	0	0.0609038	0	0	0	0
Fam159b	0	0.0359079	0	0	0	0	0	0	0
4933425L06Rik	0	0	0	0	0	0	0	0	0
Rnf180	0	0	0.116615	0.022659	0.044177	0.036079	0.0105851	0.0296886	0.0194428
Htr1a	0	0	0	0	0	0	0	0	0
1700006H21Rik	0	0	0	0	0	0	0	0	0
Mir325	0	0	0	0	0	0	0	0	0
Depdc1b	0	0.0174033	0.401614	0.01735	0.0337891	0.0184224	0.0486496	0	0
Mir582	0	0	0	0	0	0	0	0	0
Mir1904	0	0	0	0	0	0	0	0	0
Rab3c	0	0.0247083	0.012662	0.004918	0.00959965	0.00521891	0.00918585	0.00859101	0.00422839
4930526H09Rik	0	0	0	0	0	0	0	0	0
Gm38397	0	0	0.0332183	0	0	0	0	0	0
3110015C05Rik	0	0	0	0.0532365	0	0	0	0	0
Actbl2	0	0	0	0	0	0	0	0	0
Il31ra	0	0	0.0200849	0	0	0.0124286	0	0.0102271	0.0301356
Mcidas	0	0	0	0.0562413	0.0182503	0	0	0	0.016049
Cdc20b	0	0	0	0.0294429	0	0.0625614	0	0.051447	0
Mir449c	0	0	0	0	0	0	0	0	0
Mir449b	0	0	0	0	0	0	0	0	0
Mir449a	0	0	0	0	0	0	0	0	0
Gzma	0	0	2.46672	0.0577373	0.837131	0.184271	0.27055	0.0504602	0.781356
1700084D21Rik	0	0	0	0	0.137906	0	0	0	0
Gzmk	0	0	0.897605	0	0.126825	0.0699196	0.123208	0.0574235	0.0554329
4921509O07Rik	0	0	0	0	0	0	0	0	0
4930544M13Rik	0	0	0	0	0	0	0	0	0
Isl1	0	0	0	0	0	0	0	0	0
Gm6416	0	0	0	0.0563743	0	0	0	0	0
4933413L06Rik	0	0	0	0	0	0	0	0	0
1700003P14Rik	0	0	0	0	0	0	0	0	0
Gm10732	0	0	0	0	0	0	0	0	0
1700074H08Rik	0	0	0	0	0	0	0	0	0
AF067063	0	0	0.0487871	0	0	0	0	0	0
Tcstv1	0	0	0	0	0	0	0	0	0
B020031M17Rik	0	0	0	0	0	0.0575985	0	0	0
AF067061	0	0	0.196511	0	0	0	0	0	0
BC147527	0	0	0.801635	0	0	0	0	0	0.0234989
Tcstv3	0	0	0.0493344	0	0	0	0	0	0
1700110I01Rik	0	0.0267641	0.0228872	0	0.0259709	0.0567616	0	0	0.0228151
Gm3264	0	0.2312	0	0	0	0.124651	0	0	0
4930555G01Rik	0	0.0216572	0.0185148	0.0216036	0.0210201	0	0.0605938	0	0.0554338
4933406F09Rik	0	0.0364479	0	0	0.0707053	0.0774391	0	0	0.0310184
Oit1	0	0	0.647825	0	0	0.0402243	0	0	0
4930455B14Rik	0	0	0	0	0	0	0	0	0
Fhitos	0	0	0	0	0	0	0	0	0
Mir5124b	0	0	0	0	0	0	0	0	0
Fezf2	0	0	0	0	0.018676	0.0611209	0.0179347	0.0167603	0
Cadps	0	0	0	0	0	0.00820433	0	0	0
Gm5087	0	0	0	0	0	0	0	0	0
Synpr	0	0	0.0147404	0	0	0	0	0	0
Sntn	0	0	0	0	0	0	0	0	0
Olfr720	0	0	0	0	0	0	0	0	0
Olfr31	0	0	0	0	0	0	0	0	0
Nek10	0	0	0	0.0128866	0	0.0136802	0	0	0.0110521
D14Ertd670e	0	0	0	0	0	0	0	0	0
Kcnk16	0	0	0	0	0.111462	0	0	0	0
Mir6946	0	0	0	0	0	0	0	0	0
4930405A10Rik	0	0	0	0	0	0	0	0	0
Gm10248	0	0	0	0	0	0	0	0	0
4930519K11Rik	0	0	0	0	0	0	0	0	0
Mir7210	0	0	0	0	0	0	0	0	0
4930572O13Rik	0	0	0	0	0.130548	0	0	0	0
Mir3075	0	0	0	0	0	0	0	0	0
Cphx2	0	0	0	0	0	0	0	0	0
Cphx1	0	0	0	0	0	0	0	0	0
Duxbl1	0	0	0.0383345	0.0223626	0	0	0	0	2.73e-06
Duxbl2	0	0	5.6e-06	6.51e-06	0	0.0200912	0	0	0.0485866
Mir7672	0	0	0	0	0	0	0	0	0
Hesx1	0	0.0422831	0.0361899	0.0422999	0.0820041	0.0899351	0	0	0.107845
Erc2	0	0	0	0	0.0135175	0	0	0.012102	0
Mir6947	0	0	0	0	0	0	0	0	0
4831407H17Rik	0	0	0	0	0	0	0	0	0
Mir3076	0	0	0	0	0	0	0	0	0
Itih1	0	0.0141081	0	0	0	0	0.0131371	0.0122803	0
Snord69	0	0	0	0	0	0	0	0	0
Snord19	0	0	0	0	0	0	0	0	0
Msmb	0	0	0	0	0	0	0	0	0
1700024G13Rik	0	0	0	0	0	0	0	0	0
Slc18a3	0	0	0	0	0	0	0	0	0
Prrxl1	0	0	0	0	0	0	0.0277412	0	0
Fam170b	0	0	0.023022	0	0.0261235	0	0	0	0.0229486
Ptpn20	0	0	0	0	0	0	0.0131054	0.0122507	0
4930503F20Rik	0	0	0	0	0	0	0	0	0
Gdf2	0	0	0	0	0	0	0	0	0.0249135
Rbp3	0	0	0	0	0	0	0	0	0
A630023A22Rik	0	0.0351722	0	0	0	0.0747108	0.0657871	0	0
Antxrl	0	0	0	0	0	0	0	0.0182846	0
Npy4r	0	0.0236731	0.0202405	0.0708634	0.068924	0.100354	0.15461	0	0.141336
Gprin2	0	0.0286434	0.0489938	0	0	0	0	0.0249871	0.0244092
Fam25c	0	0	0	0	7.56204	0	0	0	0
9230112D13Rik	0	0	0	0	0	0	0.0630247	0	0
Mir297-1	0	0	0	0	0	0	0	0	0
Grid1	0	0	0.0215622	0	0	0	0	0	0
Mir346	0	0	0	0	0	0	0	0	0
4930596D02Rik	0	0	0	0	0	0	0	0	0
4930474N05Rik	0	0	0	0	0	0	0	0	0
Rgr	0	0.0312405	0.0610587	0.00994138	0.0101063	0.0110026	0	0	0.00889687
Lrit1	0	0	0.00847277	0	0	0	0	0	0
Lrit2	0	0	0.0134474	0	0	0	0	0	0
Nrg3	0	0	0.00914807	0	0	0	0.0100766	0	0.00925614
LOC432842	0	0	0	0	0	0	0	0	0
Nrg3os	0	0	0	0	0	0	0	0	0
1700109I08Rik	0	0	0	0	0	0	0	0	0
Dydc2	0	0	0	0	0	0	0	0	0
Dydc1	0	0	0	0	0	0	0	0	0
Mat1a	0	0	0	0	0.0120373	0	0	0	0.0105941
Sftpa1	0	0	0	0	0.0153112	0	0	0	0
Mbl1	0	0	0	0	0	0	0	0	0
Sftpd	0	0	0.0302989	0	0.0687029	0.037614	0	0	0
Gm10377	0	0	0	0	0	0	0	0	0
1700001F09Rik	0	0	0	0	0	0	0	0	0
Gm10375	0	0	0	0	0	0	0	0	0
Ear1	0	0	0.320933	0	0.217453	0	0.0705834	0	0.189863
Ang5	0	0	0	0	0	0	0	0	0
Ang3	0	0	0	0	0	0	0	0	0
Ang6	0	0	0	0	0	0	0	0	0
1700047E10Rik	0	0	0	0	0.196588	0.109296	0	0	0.0855333
BC061237	0	0	0	0	0	0	0	0	0
Mir327	0	0	0	0	0	0	0	0	0
4930431P03Rik	0	0	0.116319	0	0	0	0	0	0.0331847
4930527F14Rik	0	0.0721049	0	0	0.0698288	0	0	0	0.0609904
Mir5131	0	0	0	0	0	0	0	0	7.28e-160
Gm15217	0	0	0	0.162059	0	0	0	0	0
Rubie	0	0	0	0	0	0	0	0	0
4933425B07Rik	0	0	0	0	0	0	0	0	0
D330046F09Rik	0	0	0	0	0	0	0	0	0
Gm10371	0	0.0330028	0	0.0329732	0.0960478	0	0	0	0.0843093
4930447J18Rik	0	0	0	0	0	0	0	0	0
Otx2os1	0	0	0	0	0	0	0	0	0
4933429O19Rik	0	0	0	0	0	0	0	0	0
Olfr722	0	0.0290268	0	0	0	0	0	0	0
Olfr723	0	0	0	0	0	0	0	0	0
Olfr724	0	0	0	0	0	0	0	0	0
Olfr725	0	0	0	0	0	0	0	0	0
Olfr726	0	0	0	0	0	0	0	0	0
Olfr727	0	0	0	0	0	0	0	0	0
Olfr728	0	0.0532722	0	0	0	0	0	0	0
Olfr729	0	0	0	0	0	0	0	0	0
Olfr730	0	0	0	0	0	0	0	0	0
Olfr731	0	0	0	0	0	0	0	0	0
Olfr732	0	0	0	0	0	0	0	0	0
Olfr733	0	0	0	0	0	0	0	0.043367	0
Olfr734	0	0	0	0	0	0	0	0	0
Olfr735	0	0	0	0	0	0	0	0	0
Olfr736	0	0	0	0	0	0	0	0	0
Olfr738	0	0	0	0	0	0	0	0	0
Olfr739	0	0	0	0	0	0	0	0	0
Olfr740	0	0	0	0	0	0	0	0	0
Olfr741	0	0	0	0	0	0	0	0.0366965	0
4930413M19Rik	0	0	0	0	0	0	0	0	0
Olfr742	0	0	0	0	0	0	0	0	0
Olfr743	0	0	0	0	0	0	0	0	0
Olfr744	0	0	0	0	0	0	0	0	0
Olfr745	0	0	0	0	0	0	0	0	0
Olfr746	0	0	0	0	0	0	0	0	0
Olfr747	0	0	0	0	0	0	0	0	0
Olfr748	0	0	0	0	0	0	0	0	0
Olfr749	0	0	0	0	0	0	0	0	0
Ccnb1ip1	0	0	0	0	0	0	0.0286126	0	0
Rnase9	0	0	0	0	0	0	0	0	0
Rnase11	0	0	0	0	0	0	0	0	0
Rnase12	0	0.107742	0	0	0	0	0	0	0.0905833
[truncated: 22,359 more rows]
