# Supplementary material for: Transcriptomic and metabolomic profiling of long-lived growth hormone releasing hormone knock-out mice: evidence for altered mitochondrial function and amino acid metabolism
Source: Aging (Albany NY). 2020 Feb 23;12(4):3473–85. doi: 10.18632/aging.102822 (PMC7066919; doi:10.18632/aging.102822)
Supplement: Supplementary Table 3 [file aging-12-102822-s004..xlsx]

## Sheet: Table S3 Positive metabolome
mzmed	10722	10722	10724	10727	10728	10729	10713	10714	10715	10717	10718	10720
58.0657	10.8441	11.6752	19.793	21.7658	24.0668	38.2626	66.3312	75.1375	10.0262	38.7944	30.6247	23.9636
142.946	35.2628	34.4281	74.5378	92.3743	103.308	109.743	94.1201	103.477	46.7676	124.997	49.4885	57.5927
481.014	17.0848	172.101	42.3376	52.4221	47.2484	54.7432	71.7483	75.3797	23.8111	45.032	70.0797	60.87
161.617	21.4779	10.7275	29.2364	38.9923	33.3674	37.7182	22.7866	33.3969	10.6553	19.7464	25.4712	15.2999
162.112	1982.09	2104.94	2412.67	3576.49	2843.68	4135.78	2300.14	2236.06	953.448	1743.47	1812.51	1371.65
471.059	54.8252	185.69	202.109	244.178	220.924	397.998	211.979	201.547	119.6	216.848	128.193	125.123
493.034	49.5232	272.89	129.308	162.831	154.371	249.563	152.856	152.64	65.6928	142.801	116.121	85.8724
367.121	181.497	270.114	304.571	419.955	254.192	299.574	400.166	474.741	147.831	310.837	265.377	212.791
138.905	26.3658	17.0621	50.2186	52.8662	74.716	47.1019	79.2723	57.5531	20.6401	38.2143	61.6202	32.4316
428.097	40.947	44.4648	143.498	137.451	138.484	248.314	146.607	159.45	80.3842	180.952	83.0735	86.0784
427.095	221.437	261.525	733.495	831.699	739.964	1372.9	731.295	800.197	445.325	959.223	439.049	529.581
150.997	152.352	569.332	263.929	323.937	275.599	343.763	175.553	159.855	46.6257	159.296	224.085	107.747
103.79	6.11154	9.59276	18.1887	15.8444	17.6213	15.8813	10.514	20.2942	10.5276	23.7701	14.2962	15.5893
365.105	135.168	224.396	180.87	597.654	249.548	484.347	902.153	1000.76	218.34	483.332	1056.59	1406.47
104.106	494.17	1101.66	1425.8	1287.37	1307.17	1378.34	1096.55	1700	1013.88	1976.77	976.169	1245.33
187.057	185.006	399.032	280.812	327.779	208.625	256.114	332.481	319.159	95.3	247.646	246.967	146.831
214.552	6.92576	6.12162	27.8214	41.2552	32.7641	47.7294	32.9843	28.4619	14.743	39.7147	14.0601	19.0231
129.015	85.4748	103.024	167.543	205.486	160.998	218.987	94.8694	104.619	28.4578	106.233	127.759	66.4989
116.07	315.901	579.712	1403.54	1406.24	1669.13	3139.11	3212.76	2819.94	622.369	898.962	834.207	434.325
70.0654	18.1136	32.0437	77.2906	76.2878	93.9109	165.564	174.827	150.826	33.1873	50.0716	46.4951	27.1309
115.717	3.16607	5.13459	17.6843	15.7689	18.8239	41.3754	41.0838	33.9694	6.67707	14.1771	9.638	4.04
74.06	15.6767	29.7636	86.5686	89.5714	142.428	118.486	110.733	143.99	20.3583	96.6599	95.0984	35.205
178.992	21.5649	104.836	121.926	87.8513	65.4654	146.027	113.226	338.814	82.0359	176.4	84.4925	68.8116
398.135	115.348	204.83	207.761	288.016	248.055	288.172	241.219	240.706	68.9401	285.196	200.913	181.628
233.945	6.51013	7.48307	32.6878	27.4404	16.7294	32.5213	34.8804	82.44	28.3086	58.3373	25.7395	20.2971
397.131	728.461	1373.59	1335.56	1866.57	1608.64	1768.17	1615.7	1518	451.472	1828.46	1311.42	1220.41
275.026	127.675	74.5515	157.832	202.98	216.535	179.986	181.529	128.079	36.721	197.167	193.614	131.791
332.982	52.6496	39.1685	79.9632	88.1132	99.6363	97.8448	107.984	81.2853	34.8891	92.872	106.556	62.9284
137.534	15.1792	3.02348	22.6387	27.1508	26.9746	23.3189	23.2176	16.0878	4.15907	33.9814	26.2611	19.2158
117.726	23.4968	51.1432	67.6589	88.4441	84.3654	139.434	97.1368	97.8989	25.9975	54.1835	50.4757	27.7139
118.086	2309.96	5040.23	6556.43	7547.67	7260.38	12470.2	9615.83	9322.87	2484.27	4964.85	4869.39	2570.42
269.943	7.84606	73.2725	16.7355	16.0487	14.6816	30.6082	53.56	28.1908	20.1446	19.4531	41.2588	11.9206
119.089	148.684	312.003	422.95	478.047	469.573	796.939	594.153	614.324	161.633	318.789	309.097	165.673
223.937	10.9372	78.863	23.3792	19.5462	16.4116	39.9041	70.4639	29.4811	21.9395	22.554	85.3915	14.4582
140.067	81.5444	1172.51	230.529	221.683	250.595	472.3	327.428	294.241	89.9553	147.038	176.845	84.0291
411.147	1000.02	1046.53	674.597	1038.8	810.296	871.76	611.315	432.517	121.966	1642.11	962.985	997.877
55.0552	11.7536	24.9678	34.7296	33.6345	39.5668	70.9788	56.1722	51.0212	11.6483	28.5256	27.9346	11.8058
72.0811	380.217	897.246	1198.03	1011.22	1163.96	2280.24	1796.77	1639.56	390.507	898.135	863.98	412.507
73.0841	19.5777	41.7022	57.8591	50.084	58.6956	111.669	93.366	82.8625	18.6694	46.0951	44.612	20.3884
291.951	559.682	1085.39	1274.19	956.386	987.997	1571.36	1706.25	1938.25	518.039	1371.06	1857.42	1042.88
138.054	420.823	454.863	379.374	240.874	387.495	642.121	744.34	625.7	197.04	723.925	776.138	505.78
396.033	105.028	67.6407	129.32	112.107	87.5081	169.13	202.889	151.415	62.477	283.215	225.277	184.645
440.025	178.47	106.236	210.693	183.317	141.645	223.792	271.72	242.325	112.132	500.429	367.333	315.292
338.016	114.887	148.618	202.295	234.267	211.875	288.208	240.748	284.534	104.749	401.882	212.322	226.236
247.016	95.9001	537.151	225.395	305.396	384.169	403.696	355.089	274.769	110.907	175.647	149.847	118.469
135.002	288.795	1552.34	673.362	870.854	1034.63	1197.82	1026.01	930.729	337.595	659.93	498.55	407.144
231.989	66.1128	116.763	142.784	175.924	166.14	198.597	201.193	232.017	86.47	200.366	137.031	109.544
216.019	45.5487	105.359	108.043	87.1988	89.3969	145.38	127.105	186.62	49.6513	132.427	113.513	88.0701
357.961	149.208	617.594	390.645	292.467	323.66	615.115	524.954	630.127	283.779	451.989	407.497	312.347
215.016	553.619	1396	1255.84	944.783	1052.88	1905.7	1673.23	2239.26	634.398	1742.59	1456.39	1131.4
415.918	57.0471	152.964	117.207	100.175	113.416	172.308	174.849	145.213	79.0055	114.644	132.015	71.7347
580.916	40.2398	57.863	96.6348	53.4259	57.6643	127.084	116.848	215.24	104.933	189.609	145.506	131.681
393.936	53.2376	93.7501	111.523	96.9133	105.62	139.356	145.057	137.073	68.7382	105.772	130.868	76.393
333.982	74.6274	99.7393	174.64	140.092	142.166	243.243	235.509	357.109	139.132	296.282	193.067	190.1
447.991	77.6819	260.17	202.956	154.852	172.69	322.46	318.455	376.069	156.612	247.834	194.214	177.345
426.009	105.378	159.024	281.63	221.966	198.325	346.447	435.693	592.834	242.293	391.811	316.113	279.628
113.02	992.843	2841.08	2688.77	3254.28	3508.51	4626.27	3923.75	4922.99	1598.76	3751.61	1761.44	2055.91
469.973	51.3751	232.241	129.635	115.761	117.122	222.65	186.844	242.358	105.543	179.174	126.662	121.009
112.677	10.1855	21.0006	29.3341	32.8402	37.0266	48.3681	41.4268	50.8773	15.1135	38.8327	16.7885	20.8184
244.093	42.6582	142.762	150.101	149.156	155.396	181.2	105.878	202.495	129.455	214.439	106.806	103.057
233.982	228.233	385.877	620.285	717.351	765.411	985.782	986.785	1205.04	513.506	1047.84	447.515	537.705
285.483	5.30642	11.9568	26.2212	24.7315	20.6322	47.6384	36.7826	61.8868	22.7573	53.9702	23.281	28.3285
309.049	247.994	25.8435	611.663	677.624	840.476	932.923	803.172	1169.71	472.427	786.805	361.007	646.259
437.973	101.481	118.216	254.314	115.461	134.664	317.837	242.604	577.451	182.185	503.745	361.223	342.157
263.491	2.54536	3.36688	8.8692	9.13606	7.87228	14.0569	13.7705	19.2275	9.78896	17.6001	9.91492	10.6375
324.014	158.084	300.874	535.381	637.096	692.474	956.515	911.432	1359.22	554.78	1185.36	306.399	540.362
515.906	31.1667	35.703	67.4975	58.2042	53.1817	84.6862	94.3456	101.64	59.0915	89.7887	77.1169	66.1915
335.978	1051.91	1659.76	2582.89	1911.49	2074.64	3609.66	3225.92	5163.69	1937.79	4487.89	2601.65	2759.61
336.982	214.258	370.52	506.987	387.549	425.94	708.635	613.989	1002.1	375.765	850.755	522.295	537.997
277.497	14.8284	1.22279	46.255	39.2804	37.4661	63.9781	54.7079	91.0878	29.2977	71.0317	37.6752	44.6748
188.984	32.4924	70.1351	99.2283	112.812	122.419	159.739	145.582	193.421	58.5662	167.462	68.772	81.1668
234.989	273.524	521.781	691.222	821.944	832.493	1150.14	1002.65	1400.98	544.069	1194.59	494.896	620.391
307.024	41.0288	33.7854	112.289	88.8907	102.022	143.278	122.719	190.054	58.6369	168.148	94.6106	106.344
325.02	67.8488	158.315	224.097	298.856	259.321	397.01	333.181	487.59	185.969	407.562	132.608	196.655
205.028	68.8898	29.5967	216.675	248.656	268.719	308.331	270.165	380.141	122.005	332.354	129.363	171.646
155.028	87.2303	32.4761	346.104	390.578	420.329	554.044	466.287	749.501	203.982	664.765	165	283.674
155.529	9.1332	1.12825	35.5953	40.8615	41.8506	52.5022	45.2124	74.0122	18.892	71.2192	15.595	31.579
255.502	5.50522	0.683391	13.9378	12.3185	14.2578	17.9272	17.6993	28.1978	8.3197	23.972	16.6177	15.1673
133.031	130.323	355.8	465.477	450.775	449.543	658.137	1160.6	777.248	234.707	625.443	374.238	320.961
150.058	630.282	1597.2	2141.16	2015.29	2030.33	2948.79	5359.17	3478.08	1110.03	2845.14	1715.42	1529.08
149.598	5.64181	12.8983	20.7978	20.3461	21.7003	33.09	52.7925	36.4895	10.8001	30.88	17.308	14.6114
152.054	34.0881	79.5944	130.316	116.546	121.927	176.332	308.684	195.11	65.9376	176.368	116.369	82.9864
172.039	27.3305	90.1115	96.3487	91.2406	100.432	135.426	245.443	126.101	49.3293	101.67	74.356	50.0932
194.021	12.8397	45.8173	41.3219	41.4309	51.4801	59.4951	109.701	49.5658	19.662	33.9919	35.123	21.3906
144.101	484.634	431.922	787.688	808.807	939.529	1687.11	1665.36	1596.22	223.6	1160.48	1146.53	797.209
143.661	5.57605	4.58457	7.88705	8.11906	9.4877	19.4632	21.1017	15.0034	3.13271	13.1669	11.1177	9.45391
171.025	11.5577	35.5791	48.8027	33.8866	30.4258	54.379	56.8377	76.7282	22.7498	60.2729	34.8163	28.0122
161.134	121.015	282.07	295.351	196.241	182.976	228.06	316.55	212.879	119.54	316.412	240.329	181.371
160.132	1284.25	2956.59	3310.81	2068.41	2006.39	2461.58	3258.62	2247.11	1327.18	3277.28	2511.13	1941.53
159.643	12.7425	29.8618	33.6372	23.8627	23.0773	21.4111	33.2324	31.1082	13.2922	37.2205	29.9306	20.5007
204.123	3080.6	4434.36	4649.14	5806.02	5859.01	8639.99	4888.91	9822.71	2678.18	5569.65	5764.94	3339.87
203.496	29.8288	43.7303	46.8908	60.4305	59.3438	88.5337	46.9991	98.764	25.6999	54.2355	56.2137	32.8572
348.071	4.55322	1693.78	335.098	6266.33	2109.8	13010.6	15.9079	19.9195	7.72643	1668.94	9.65189	89.6305
152.031	28.0038	135.569	135.406	193.58	173.166	293.72	274.45	254.593	79.9079	202.143	151.258	66.0619
191.017	37.2229	152.415	197.318	279.284	124.258	280.683	176.15	323.086	83.7315	344.541	125.18	162.374
169.035	139.421	566.696	744.968	1064.84	459.8	938.702	613.855	1434.75	323.994	1928.09	517.372	859.471
141.015	39.3332	110.384	298.608	142.981	53.7762	179.01	67.2298	756.011	181.055	1868.08	87.4465	1072.53
231.084	263.026	366.748	219.9	202.866	218.071	382.495	333.059	270.92	117.626	504.253	357.412	308.573
447.69	39.1603	10.6313	49.7067	108.933	61.8701	97.8663	87.495	106.425	80.6883	72.6186	51.0583	48.6594
278.573	22.4757	411.049	69.2031	107.925	124.278	170.864	70.149	66.1946	90.9255	167.981	71.1789	125.571
556.133	21.4515	231.581	42.9762	70.2921	69.5747	118.855	50.0205	46.3132	75.5069	92.7387	38.3603	66.6832
126.65	9.66475	22.6189	13.5782	5.81548	9.65603	7.80236	13.2187	10.4936	11.4741	8.77726	20.3825	9.74307
158.113	264.099	265.397	336.717	466.739	456.019	736.681	360.558	607.546	144.279	254.146	303.749	291.225
262.014	104.981	170.666	92.5902	50.8301	110.673	88.7209	155.533	174.86	137.577	79.5308	266.436	81.1096
341.509	27.4649	0.259935	47.4839	34.9293	14.8512	13.7046	100.307	51.1427	25.0125	35.3958	62.9279	40.2874
127.036	868.691	1742.69	893.978	646.928	1082.22	977.114	1316.09	1709.55	1128.46	861.394	1967	779.802
429.611	4.27321	45.8538	24.0572	18.244	11.3306	16.2495	4.17521	24.4173	73.8141	156.696	10.1122	114.436
334.542	14.7781	45.0221	18.2395	24.6428	19.4057	21.1402	12.8094	13.471	10.0873	37.1724	11.8193	24.1676
333.539	14.2166	82.2321	28.3236	46.8396	23.7447	26.4895	20.6259	19.3608	22.3146	42.6772	19.6704	35.7467
308.584	34.7038	312.176	106.987	151.047	102.406	105.186	48.0976	62.3399	85.4117	266.765	63.0918	177.112
307.084	922.223	9575.44	2988.45	4257.14	2709.49	3309.84	1568.8	1813.93	2391.83	7820.93	1853.03	5225.16
307.585	231.809	2557.58	796.401	1146.56	718.19	880.96	421.554	468.091	625.822	2113.92	479.707	1402.03
308.084	194.487	1857.5	584.058	817.456	563.263	696.995	334.073	363.803	509.039	1597.02	374.336	1035.23
615.159	123.885	1282.06	340.579	400.201	266.158	464.554	199.29	189.892	393.62	786.06	154.071	596.214
635.141	134.202	1111.85	337.206	435.295	341.493	619.245	246.262	200.982	279.189	413.204	189.029	355.885
651.11	30.624	94.5438	67.2993	98.3301	63.1736	76.3855	32.7828	36.1225	58.0655	85.6578	57.875	87.3887
614.162	194.463	2282.92	631.584	747.34	494.454	890.142	340.498	351.624	653.916	1384.34	284.031	1036.35
613.159	679.209	9177.14	2298.86	2796.23	1756.26	3405.29	1267.44	1288.74	2346.04	5284.04	1084.35	3904.99
154.083	334.105	535.775	418.178	409.097	443.203	923.736	584.873	598.397	274.439	241.156	368.451	209.775
174.159	601.457	881.041	682.185	809.718	848.917	748.672	773.501	837.616	521.434	793.263	762.888	807.402
484.115	39.0924	352.51	127.627	146.669	107.455	131.369	61.0664	72.3669	97.6314	293.725	65.3982	188.944
636.143	41.0545	281.494	91.2282	130.991	92.6414	196.767	74.1061	65.3168	90.5588	113.057	61.8912	94.6457
657.123	56.4255	212.464	98.2038	108.36	86.4863	171.927	66.7539	66.1667	74.9231	113.445	69.8527	110.115
175.163	58.9499	97.8495	84.2319	83.2958	91.018	84.5247	93.9995	96.4743	53.7283	93.9561	80.7104	84.6977
86.0963	1534.31	3001.44	2734.44	2532.02	2475.21	5101.47	3610.73	3848.48	1694.99	2054.99	2108.39	1466.07
134.106	81.2806	171.902	157.689	139.105	140.499	277.508	194.959	220.244	89.9132	122.154	117.977	88.0121
132.101	11503.4	21661.6	21410.2	18663.5	18324.4	37338.7	28019.5	28499.3	12836.1	15766.3	15733.8	11257.9
133.104	850.677	1638.48	1602.54	1431.99	1401.08	2881.68	2106.77	2179.03	959.573	1186.64	1191.36	859.629
85.8362	18.5609	39.4148	33.3517	30.3011	30.1502	51.453	47.1771	46.1221	22.0229	26.4037	25.2044	20.2854
131.699	117.871	219.832	225.354	209.603	190.701	426.461	311.633	285.944	123.173	170.296	164.982	115.752
154.046	31.1164	72.8583	67.5661	57.6761	44.7474	58.0642	27.32	74.9209	72.579	105.783	55.4308	87.996
203.972	116.24	162.453	114.841	103.685	141.77	131.712	201.23	167.908	117.829	108.153	206.04	95.5792
241.018	41.0286	48.2474	67.3831	53.812	65.0123	83.1446	72.6482	75.9693	47.6778	63.8213	65.3063	49.9054
135.649	5.72873	17.7064	22.5985	16.5824	12.2171	30.17	23.6641	25.4336	10.0437	12.5963	13.0431	12.7332
119.047	35.4686	117.921	119.84	57.6746	85.4929	143.27	157.922	178.973	69.9019	139.412	66.5018	81.9773
164.552	9.20693	20.1185	19.9492	15.3587	12.5126	27.4514	36.4327	26.0295	14.0124	15.6524	9.21703	13.3008
182.081	2549.67	10639.5	8832.12	4392.69	5827.01	10791.9	13052.3	10891.1	5329.96	7130.93	5285.29	4877.49
165.054	521.02	2101.14	1709.22	924.171	1208.08	2029.91	2669.24	2220.9	995.862	1367.53	1040.92	938.658
136.074	251.78	1200.34	900.403	699.905	699.876	1204.68	1250.58	1061.46	489.015	866.738	518.402	522.072
181.524	31.0673	102.163	87.2132	41.6389	68.4741	122.311	139.025	122.522	53.2922	74.0937	55.0273	51.9812
123.043	58.8893	230.329	157.916	91.4628	111.305	216.87	260.041	227.943	109.966	144.571	115.652	100.131
233.116	208.197	504.723	321.393	287.789	490.567	427.848	350.158	376.439	205.816	105.87	191.813	158.096
153.04	16.7268	387.617	286.873	144.174	92.482	101.43	32.745	439.168	581.313	934.689	32.7999	601.392
344.127	92.0301	256.314	220.198	86.9646	138.184	248.921	337.737	326.298	122.689	229.105	128.257	182.577
226.042	45.3443	139.959	60.4272	45.8868	71.6754	112.289	103.95	64.6404	26.2809	24.4037	63.7916	23.8735
197.005	27.8879	23.8819	125.116	36.8448	148.415	186.816	270.088	187.777	75.9736	184.487	47.4938	93.5115
276.144	225.951	410.906	439.285	222.374	301.708	647.493	700.463	740.956	167.649	332.781	184.7	260.445
294.155	499.129	949.923	1009.88	476.23	660.735	1371.6	1618.13	1665.99	417.915	746.362	392.059	605.516
268.105	33.1833	6926.29	3738.1	8003.5	4113.88	6765.57	61.4234	70.7929	130.261	5764.97	67.8579	2269.88
269.101	13.4665	1457.41	820.1	1261.64	624.182	1020.16	33.735	151.519	552.378	1818.84	25.1873	941.974
348.177	379.026	679.656	323.689	507.229	402.313	328.569	562.41	527.792	259.101	269.19	355.885	264.772
196.473	14.1176	0.810414	24.0631	48.7824	26.9692	48.548	40.7128	33.6393	29.1858	24.0664	13.1423	19.8804
293.698	70.9265	1.09525	106.131	203.119	138.579	241.428	152.586	145.536	133.446	74.0377	61.4595	72.7682
258.495	14.8864	0	14.7515	21.0786	33.9441	50.8995	26.9234	26.8106	15.2008	13.2413	13.041	9.11531
396.728	60.1917	6.47551	43.6775	62.7872	118.369	161.131	81.0819	77.692	48.8026	27.019	37.7918	29.4176
257.493	666.528	7.26288	693.408	868.16	1668.16	2280.79	1176.38	1290.75	700.118	462.339	581.051	431.882
385.735	529.593	6.61116	514.405	627.214	1171.44	1643.87	800.191	896.071	630.414	360.42	416.671	348.267
257.827	272.53	4.94533	306.034	352.625	688.857	930.957	491.83	554.05	289.937	191.683	244.159	183.466
386.737	55.9731	3.82563	54.1951	68.0238	121.801	180.743	87.7215	97.1279	63.2324	37.5629	41.0571	34.4576
386.234	224.049	21.6052	227.646	269.263	500.156	691.179	341.687	383.806	262.421	148.782	172.225	146.249
251.489	9.32851	0.420755	10.9135	12.2788	21.9407	33.6218	17.1987	18.3995	11.4407	7.75306	8.60457	7.47921
219.141	52.4063	51.7495	150.79	75.7751	173.753	267.549	110.781	357.567	84.4918	227.462	58.0363	207.177
218.139	418.41	380.819	1261.57	593.976	1440.68	2254.23	919.857	3115.81	723.114	1950.52	464.472	1730.34
217.472	4.18006	2.89266	11.2288	6.5385	13.7745	22.1591	9.1846	28.5381	7.0676	18.9446	4.35899	18.3168
284.098	15.8869	460.012	372.621	401.252	201.216	234.569	28.9637	33.9249	190.26	439.577	38.5249	389.264
137.045	3.3508	657.609	441.869	234.844	75.0654	140.406	6.49372	200.581	796.059	1416.2	8.75068	804.361
266.488	18.8726	0.336551	25.7147	45.9077	49.6036	43.1441	47.6672	29.2144	25.8128	95.2469	41.2544	55.0092
265.817	153.423	7.64686	228.086	371.935	403.308	368.77	391.098	230.042	191.442	768.731	311.628	467.966
398.723	50.4406	37.5038	79.2917	106.391	115.166	112.898	109.487	95.1065	64.0576	214.22	97.0385	145.91
173.077	436.086	5126.22	5220.12	2199.49	2213.08	2507.56	205.913	230.989	180.91	190.937	246.633	184.984
335.923	49.8543	4.07661	91.4777	101.477	78.9851	55.1735	215.287	212.401	29.7119	70.6141	94.6712	54.1815
447.563	33.0353	10.1967	69.245	62.9839	47.7574	35.7765	126.701	136.628	21.0389	43.1328	64.2394	35.5614
262.165	114.844	98.2238	110.807	205.155	107.043	243.841	106.136	187.213	136.689	171.821	169.58	129.735
100.111	13.7705	56.0046	20.7943	42.8418	36.5557	50.8997	19.2351	65.0039	25.7023	27.5997	23.9599	34.8413
491.469	36.1248	30.267	28.9537	26.4351	85.014	151.455	76.8707	27.8619	44.3324	17.4911	36.2743	19.1314
655.171	72.696	450.92	122.38	134.939	139.216	228.376	30.7343	63.5133	64.5624	174.007	67.5479	96.2682
407.716	10.6733	444.642	16.1219	50.7146	22.142	49.7637	25.3705	674.446	7.07408	75.7007	90.06	15.4108
406.713	74.0276	3619.17	104.252	314.927	126.958	156.246	169.096	5440.22	23.4299	611.229	727.134	104.244
362.508	49.7061	4.21299	72.5084	68.8851	87.3671	80.8	147.006	111.814	80.8982	140.485	96.2911	88.9059
362.834	30.2031	10.6028	49.3599	41.7623	57.2332	59.5028	92.1366	77.243	51.8148	81.8798	61.3931	50.5304
481.9	57.981	6.13378	74.4093	61.2156	97.779	119.195	68.4385	96.7757	49.2443	51.5106	69.9874	38.1667
481.568	74.5979	1.56758	98.1122	80.6278	135.887	160.317	85.9142	132.968	62.1256	65.6139	93.2579	47.1685
272.388	8.91101	1.13984	14.2658	13.7859	17.401	20.6917	32.5996	22.2575	15.081	25.4826	20.0496	15.3978
175.032	123.482	85.5887	79.4906	107.604	93.6419	149.587	109.991	177.654	92.642	91.2656	105.216	82.128
281.834	69.8349	8.62371	48.7678	36.531	258.174	312.21	61.8624	72.7569	31.0474	21.5743	69.9364	20.9076
136.036	33.0807	31.6318	23.5924	26.4762	23.3713	44.1618	35.3739	44.5878	18.6892	23.5818	26.5789	20.8136
146.155	3.3201	8.48219	21.4506	24.0116	8.47894	9.43161	26.823	9.40945	2.92688	6.27602	7.15316	11.5137
514.704	30.865	7.99623	42.6507	54.6161	59.1823	56.7315	119.744	57.9456	31.3344	72.5283	70.2554	52.2796
667.961	420.433	11.3413	674.602	825.979	871.408	807.091	2021.68	907.58	399.088	1166.05	964.274	820.38
668.964	96.8749	2.70654	155.72	184.507	198.979	185.241	401.938	202.515	87.2311	257.838	209.087	185.046
668.63	219.139	3.26378	355.318	417.295	428.587	451.39	1009.03	480.054	199.932	620.833	489.447	397.293
668.295	376.747	42.9575	621.694	743.75	761.426	828.559	1724.9	833.672	364.294	1065.96	867.396	629.937
503.515	26.5134	5.85044	28.5837	33.7923	35.2239	43.9063	69.5727	34.3759	19.9911	30.9189	34.7231	19.7339
191.081	268.286	264.99	870.946	1461.99	777.927	1729.63	377.96	1005.44	858.849	1038.48	678.648	633.089
334.675	318.799	454.116	438.316	669.716	614.377	430.737	611.066	401.092	285.591	969.214	608.069	943.892
334.175	927.376	1264.85	1237.14	1838.75	1704.42	1254.18	1735.28	1118.19	809.256	2683.34	1708.65	2642.17
532.599	33.9115	3.12679	33.6584	70.9362	145.376	197.793	177.053	130.715	57.8164	19.228	37.568	17.7579
315.514	19.0127	0.830422	24.9636	27.5097	33.0434	33.6463	17.8152	17.3621	31.6952	48.9346	29.1826	24.0768
358.685	47.0021	4.02609	37.676	22.4627	62.218	40.1849	26.6604	26.5991	14.6802	20.9909	35.1649	33.8016
369.672	45.0983	2.40836	36.2444	21.5723	69.0106	38.9754	28.2891	24.9099	16.2468	15.1579	37.4949	26.5192
234.65	39.2105	0.573255	60.9135	75.5934	54.9023	95.5548	28.8281	18.7359	61.8407	41.7621	55.068	35.6008
77.037	7.32269	15.7135	14.6267	12.7548	12.7933	13.1185	24.1928	15.7262	13.3398	19.9162	13.05	12.8731
167.088	1095.13	1581.73	2593.84	2295.4	1857.17	3111.67	3461.64	3190.09	1605.95	2277.76	1921.51	1568.08
168.09	113.099	150.289	251.08	214.46	192.03	309.32	317.305	303.096	141.008	735.82	197.44	401.061
50.0168	8.22396	12.538	13.5044	10.6041	15.3993	18.3779	27.6859	15.4851	10.3071	11.728	12.0599	9.08271
121.083	232.488	376.31	577.819	502.479	449.737	698.793	766.147	738.704	355.951	533.993	428.277	347.859
166.086	10068.4	14526.6	24072.9	21123.9	16840.7	28436	32560.2	29687.3	14630.9	21444.8	17589.4	14650.3
120.08	2508.83	3848.54	6279.25	5443.52	4443.28	7524.47	8487.36	7749.89	3656.06	5465.34	4518.68	3671.43
149.059	147.043	220.962	335.085	321.075	240.447	430.593	447.39	432.474	206.516	309.969	274.936	198.954
103.053	80.7863	127.836	206.424	165.436	156.442	236.835	279.999	255.934	122.473	177.162	160.586	134.286
165.578	86.0905	148.659	263.994	217.767	184.571	307.051	366.002	321.677	141.126	228.629	184.877	153.63
119.715	28.2274	50.2369	72.7535	70.8039	58.2247	91.6594	114.26	99.6468	42.6394	78.0868	55.2648	46.7454
890.396	100.935	0	148.441	204.266	161.857	161.292	314.309	176.93	87.4185	256.453	251.453	219.753
889.395	244.679	1.30063	384.859	412.777	326.165	339.765	619.997	412.044	213.933	588.702	452.627	409.33
889.895	191.979	0.248816	312.631	358.107	302.549	271.129	499.766	378.131	156.067	525.38	384.932	343.637
310.123	82.3057	148.563	227.093	114.178	104.739	162.133	286.79	262.879	102.792	211.074	108.599	154.783
328.139	203.143	329.078	458.734	237.448	257.006	410.55	625.762	728.321	229.355	453.298	236.101	365.93
628.314	297.44	11.1691	376.616	419.87	602.247	507.455	937.733	487.49	340.338	472.298	493.74	323.019
628.65	268.341	0.418851	360.119	440.388	541.546	448.352	903.083	447.711	284.228	420.916	462.115	321.464
628.985	149.922	2.32365	192.549	226.228	300.227	252.35	493.284	310.791	177.145	208.465	274.665	184.81
671.168	93.1406	1318.64	252.024	244.29	195.61	197.477	81.0617	95.7079	213.35	450.792	123.791	314.346
672.17	28.9715	381.362	80.0095	72.2248	72.8378	95.4802	34.2821	29.5	54.0497	102.121	34.9578	99.6373
304.833	40.6479	2.18192	145.592	112.528	50.9237	23.6577	81.8703	104.116	96.0153	314.19	105.739	164.233
331.681	57.4241	0.0896374	50.4096	48.1495	83.9841	30.2736	118.874	72.045	20.8235	60.6321	123.209	42.9339
248.58	6.79538	92.6659	34.0567	27.2101	53.4777	28.3556	6.11149	18.3477	19.0463	41.1231	22.1246	50.4665
339.664	20.5631	1.72426	27.9953	51.4219	77.9039	125.634	140.428	81.0804	59.1279	18.4099	19.9458	15.4439
384.845	26.413	1.2157	22.9516	44.4767	58.0455	78.2141	69.1118	50.2264	30.0306	18.9635	21.0805	15.9782
311.124	329.79	475.483	918.755	506.772	1112.1	1676.17	1558.47	1099.83	731.503	926.288	773.874	785.21
129.529	3.77644	0.112525	5.13469	6.52558	4.68213	2.50984	8.2638	12.4351	8.46361	9.51068	7.80086	11.3934
242.1	192.956	307.226	290.19	229.783	187.382	212.51	708.255	636.073	438.072	542.987	397.425	381.154
220.118	374.367	745.326	839.971	510.711	404.951	470.605	1262.07	1258.08	816.813	1137.5	777.535	723.208
414.691	107.832	0.911003	99.3175	64.2856	57.6177	50.7808	145.609	77.4431	54.1899	89.1243	140.736	89.706
312.125	80.4355	116.753	207.624	149.316	231.341	335.152	328.637	244.858	174.626	200.413	195.199	181.573
316.834	17.5447	0.591496	27.1645	33.3411	38.6097	30.9329	46.195	50.1751	26.419	47.3923	34.7064	25.7393
486.103	49.8301	192.818	107.797	118.281	113.583	154.001	67.8848	74.8271	68.6871	106	59.5115	71.0261
485.107	219.909	871.659	462.31	532.818	577.737	732.538	262.343	318.372	309.408	486.947	261.551	290.681
217.105	2224.5	17379.4	20097.1	8459.05	9218.74	9868.28	638.205	907.908	1197.11	738.49	1495.56	766.11
216.438	20.1314	181.002	194.085	91.0573	89.9811	94.7517	7.07921	7.65131	10.6477	6.96362	14.6248	6.51295
297.145	1115.98	403.382	1262.31	938.764	978.426	3493.79	2262.26	2931.88	834.532	2451.35	1995.63	1858.14
221.092	295.448	163.452	495.017	371.612	334.088	322.748	896.765	520.439	266.942	318.643	382.376	245.051
444.578	22.4716	3.19444	86.514	64.0486	38.5614	32.8888	43.5212	42.9371	47.9628	182.875	47.2065	70.285
449.71	251.321	3.37313	198.824	146.989	196.613	197.516	398.211	191.624	142.979	247.536	330.181	209.606
322.509	15.7412	4.31956	59.2107	39.0818	15.9542	11.7927	29.7845	37.9701	32.01	115.971	39.5552	46.7185
346.484	7.07261	0.751053	22.3686	17.7583	7.49985	4.37793	11.0409	13.516	16.9354	49.2021	17.8086	20.44
328.511	210.653	5.74686	832.071	550.077	184.938	82.2304	449.949	494.696	448.395	1694.74	545.249	696.077
492.764	122.616	3.00181	411.337	279.991	105.85	66.3085	236.781	255.944	246.529	808.818	282.671	365.311
411.681	34.735	7.06927	66.3779	70.552	77.5651	70.3339	83.1702	71.053	47.0032	55.7739	64.4289	54.6215
410.678	245.624	16.7206	491.92	533.37	566.965	499.944	612.663	578.072	344.07	450.141	457.536	363.639
302.88	58.7734	9.13596	83.4047	76.665	78.9926	87.5919	64.1299	99.6842	70.6136	90.3125	78.8846	68.6391
282.912	136.662	9.31398	200.637	192.88	198.293	209.611	164.697	214.991	136.414	232.782	196.565	174.09
284.909	141.439	6.26906	216.002	178.891	200.602	212.976	160.096	204.264	136.13	219.173	197.996	172.776
298.884	59.678	14.1179	90.5502	90.5988	94.2801	100.342	56.9314	99.9785	85.0455	113.721	82.8437	72.7249
168.895	14.4702	15.4635	21.6745	22.1956	21.2188	22.2852	20.2456	26.1398	15.5985	23.2832	24.4158	17.176
166.898	21.5193	31.0112	32.6222	31.3768	35.5333	31.6948	31.0253	36.5756	25.9219	35.111	34.1595	25.2621
232.155	725.241	357.25	2767.61	871.549	1513.79	3789.28	1044.23	10688.6	1544.14	9920.72	1186.6	5100.43
237.656	197.914	0.623089	241.954	284.432	483.14	575.824	219.693	249.056	147.832	203.373	281.95	140.677
233.157	93.7487	48.7001	355.864	113.701	197.052	498.041	136.651	1337.77	196.299	1296.23	154.02	656.775
231.442	6.50179	5.06137	29.1311	8.8735	12.3355	34.992	9.15716	95.43	14.1008	92.3307	11.5526	47.6674
520.776	115.131	4.08813	128.459	186.87	163.945	53.6869	205.637	178.363	39.8537	97.4153	231.41	68.6713
331.873	28.5172	3.14368	42.1905	38.4489	46.3815	45.8726	53.1556	42.2427	29.4843	48.2166	42.1722	40.1741
222.148	635.95	635.234	1834.26	636.827	698.529	526.639	1604.66	1042.22	571.563	800.588	415.329	1453.9
355.678	28.2515	6.31673	57.4069	112.156	75.6829	72.6786	65.744	63.5423	51.4829	60.9741	46.5375	43.0569
223.152	94.7332	96.2638	278.159	99.988	105.236	79.6765	240.716	150.036	84.7691	121.986	63.9583	225.641
307.429	21.7683	1.86372	32.4158	63.1867	89.0907	85.6159	60.5042	38.7925	21.7344	57.9513	44.7614	37.3628
417.219	133.676	55.3366	184.728	175.769	541.566	387.654	401.536	224.809	255.589	232.939	345.399	153.37
694.696	54.6653	5.18826	73.1085	56.8713	215.913	152.375	143.167	101.664	119.409	87.4003	127.739	59.9824
417.623	30.8965	15.53	42.6268	39.137	131.868	96.6064	92.6531	59.5646	62.3719	56.4745	76.8136	39.1075
401.89	57.0792	3.3457	293.417	179.786	93.4901	46.3995	100.648	161.582	162.083	462.966	139.403	204.819
521.023	176.781	9.52559	223.962	191.452	692.173	477.484	516.249	310.148	345.419	292.915	419.269	204.771
521.524	101.513	1.63697	129.051	117.006	431.069	312.949	320.987	190.86	209.791	188.81	265.483	129.132
417.422	65.7992	1.27259	83.1987	73.7429	285.891	192.388	212.737	125.322	131.469	133.22	179.941	77.4275
280.498	22.9489	0.931951	23.5764	22.8611	40.6828	54.3901	30.7519	22.7422	20.652	10.9679	17.9205	8.95675
331.525	41.9755	5.2534	48.5653	55.4138	65.3642	63.4153	92.5997	43.6267	37.5815	54.4077	73.0686	48.8584
310.176	606.447	56.244	651.383	609.855	761.071	111.059	1033.78	500.814	286.04	166.653	639.847	347.646
483.754	98.0489	3.40551	210.959	243.842	157.319	162.05	631.516	342.01	133.838	261.667	257.141	244.258
282.17	962.774	138.731	814.257	888.827	764.549	665.826	1036.4	953.899	482.518	526.865	471.38	922.493
285.691	46.9721	3.15132	63.4969	92.8166	83.3017	80.9046	154.074	104.562	54.2349	62.5385	71.1056	44.3667
313.663	30.9945	0.472247	42.0231	87.0615	141.829	220.312	162.58	134.688	64.1243	39.3396	42.3541	22.2634
521.739	160.862	0.963909	183.289	345.604	363.156	427.77	398.059	366.63	443.532	237.1	287.418	155.674
456.749	192.037	3.87603	134.583	233.61	714.684	2059.78	396.7	138.609	206.782	99.4652	193.118	90.8816
438.55	25.2766	1.60547	17.2748	25.6046	45.5846	67.379	47.7502	42.7394	38.0209	43.8596	46.7372	23.889
304.173	728.771	623.933	403.204	929.939	607.42	1396.26	322.595	312.957	196.573	347.624	458.761	279.605
440.998	82.013	3.58566	116.811	142.843	139.466	133.278	29.5207	39.5372	98.0011	54.8791	80.8558	35.7416
521.223	254.059	47.1426	319.948	643.587	433.619	645.411	579.618	577.78	700.601	333.411	354.592	273.898
259.016	66.0371	52.5313	74.2145	109.432	98.7433	93.2998	51.9588	58.3967	28.9635	44.8143	58.4006	33.4032
238.415	17.0144	298.633	307.16	108.638	74.2328	75.1643	3.06637	5.01063	14.7001	5.42279	19.7389	5.13525
239.149	1323.8	29980.8	30123.4	9218.68	8205.52	8139.56	396.889	393.886	1341.54	468.387	1393.66	374.329
298.098	406.412	518.327	507.649	797.035	505.086	1143.52	633.216	587.433	458.037	1180.88	740.61	551.302
277.105	293.454	4023.94	2963.97	1439.39	1059.82	1270.16	153.743	134.477	408.244	180.485	355.884	135.773
315.681	113.847	2.21615	96.6163	234.841	377.031	877.771	76.1502	87.333	212.759	109.771	146.143	84.6703
261.132	6232.8	44842.2	44847.7	24296.3	23760.9	24584.1	4816.65	4322.96	6508.84	4439.91	6437.35	3353.12
260.328	58.1105	416.983	391.314	221.349	223.031	218.755	19.7962	38.4433	51.7505	21.9699	57.4874	19.2439
262.135	726.946	5289.01	5280.7	2910	2864.36	2852.35	723.174	284.984	786.468	651.834	810.25	489.084
264.159	73.2321	51.9387	184.945	155.024	170.005	137.422	404.024	231.918	34.6615	127.437	95.4673	181.887
250.144	587.97	565.046	1576.14	475.907	677.751	366.178	2477	1348.99	351.863	803.753	382.262	1908.68
275.111	377.661	455.714	284.42	649.794	403.723	505.343	476.196	424.8	727.354	595.601	1619.15	419.342
474.174	437.69	397.855	670.457	365.726	448.728	154.108	428.939	126.127	551.195	221.089	332.848	178.427
470.698	30.3874	0.2315	53.5065	92.2943	27.6602	52.4284	75.3436	69.5247	69.9613	47.3751	56.6633	32.8691
367.16	583.309	331.998	1282.34	784.532	809.563	1016.05	1629.5	1390.21	563.589	889.279	654.37	797.829
482.01	73.0623	21.0484	75.2455	118.136	333.085	160.126	225.86	90.7594	142.975	95.6301	151.719	69.2132
642.663	49.1953	0	55.4063	75.1914	239.014	135.091	128.796	69.7353	100.65	55.6599	98.4025	45.9366
482.503	37.3232	0	43.022	60.206	173.543	113.486	101.296	45.2713	68.7011	46.4554	64.8524	34.3592
472.027	26.3701	2.94107	37.8461	20.5818	26.3609	26.5937	59.5504	40.9555	24.3506	60.5607	34.5918	44.2578
677.351	237.525	9.20948	181.841	242.056	283.332	265.337	374.584	239.268	99.0755	224.193	336.571	223.015
346.033	127.944	73.3305	127.192	79.5639	73.8365	48.1847	130.465	128.824	40.389	51.5173	61.1429	94.9932
677.856	166.24	1.62706	124.599	161.772	203.611	190.403	255.407	165.528	70.3008	159.06	224.856	138.475
559.754	21.0997	1.13296	105.56	101.98	81.6357	94.6942	70.7817	103.277	73.0506	122.513	59.825	40.8683
414.561	28.8927	1.70559	69.1727	44.6312	20.6333	19.583	41.6268	45.0513	45.387	147.16	55.7821	56.0719
355.21	487.478	609.816	652.516	767.57	836.587	747.666	673.405	815.921	490.775	712.734	694.186	501.764
354.213	2545.09	3409.63	3595.61	3888.52	4290.47	4069.78	3466.63	4078.96	2572.87	4044.12	3687	2907.03
144.174	37.0842	25.4637	51.8178	48.1235	40.8815	44.1186	32.3645	54.3993	40.1804	61.0713	20.9975	41.9042
366.873	238.692	11.0946	235.936	602.85	813.815	545.452	614.809	353.834	192.905	307.575	362.729	305.951
549.801	109.195	4.29848	131.418	253.462	310.336	286.463	322.681	220.758	112.274	134.393	193.582	124.515
367.543	62.8376	5.86644	68.6472	131.865	189.322	97.1456	150.782	101.263	37.8585	73.3296	90.4523	58.8721
494.123	39.6116	74.6407	181.66	45.3182	95.1644	109.66	60.9139	115.643	105.152	108.65	38.3162	151.588
409.188	2106.61	685.789	4626.82	2662.02	1794.77	4156.99	7577.92	5169.68	2994.45	2426.45	2790.79	1919.25
410.19	563.404	210.633	1162.5	703.817	537.929	1158.11	1920.74	1278.61	866.599	667.953	781.916	565.982
470.135	111.375	156.633	161.456	151.286	237.877	179.443	171.25	106.408	75.5484	146.966	104.924	75.7552
805.91	122.203	2.85328	61.7732	115.972	82.897	117.003	137.487	84.9559	54.0161	82.6613	137.366	115.871
870.288	51.1377	13.0032	97.8662	76.3909	58.6768	82.8106	185.068	104.757	89.2727	43.5327	67.9681	37.7817
281.61	13.2636	10.154	62.4542	41.0681	20.3422	31.1946	60.2255	33.7031	17.9671	23.6812	32.6314	7.64219
117.057	104.219	53.0058	226.005	129.47	111.545	165.14	295.137	206.602	100.11	139.909	136.302	96.3463
405.199	361.754	237.742	715.011	361.458	429.392	331.586	778.803	675.056	266.324	367.857	304.258	544.645
207.102	349.927	148.031	678.768	577.325	387.582	593.305	914.941	754.648	401.341	468.66	494.263	367.276
172.572	13.4663	3.59038	23.4817	29.6089	17.0423	9.49281	18.5898	21.4629	15.0771	15.1262	22.6841	10.4049
189.073	1942.9	763.728	4172.01	2969.71	2285.72	3828.44	6034.58	4634.1	2482.38	2994.05	3000.91	2100.12
305.017	63.9082	15.295	139.646	97.333	80.6879	146.064	133.94	126.282	126.176	94.8429	106.294	84.5509
206.1	3173.8	1213.73	6393.03	4571.6	3440.3	5832.33	9003.11	7236.51	4003.88	4632.03	4790.78	3326.83
205.097	23683.5	8849.22	47580.2	33717	25448.9	43581.5	68391.2	53448.4	29720.5	33988.4	34987.8	25579.2
188.071	15444.8	5799.42	32277.5	22613.9	17130.6	29549.5	47878.7	36416.3	19353	22847.9	23596.5	16123.9
159.091	248.679	147.263	537.779	360.48	281.984	469.831	767.692	560.986	317.454	385.318	379.932	293.555
187.494	159.649	56.9635	344.799	251.894	179.219	315.603	488.62	375.429	205.676	219.731	229.368	175.252
188.511	23.9619	7.92748	65.6932	44.2849	37.3141	60.3989	81.013	71.5277	40.5869	49.0417	30.856	32.5939
204.468	225.375	74.1069	419.747	366.458	254.776	449.246	650.757	532.184	273.063	358.546	354.357	242.232
146.059	472.921	197.752	994.459	660.698	551.059	907.18	1523.96	1105.57	566.833	712.851	671.043	488.32
641.192	139.761	80.4849	485.251	199.144	111.741	293.929	395.991	622.843	256.035	394.094	332.122	243.032
195.575	18.7644	8.26287	33.9439	25.5678	24.5368	49.763	72.5808	35.3617	31.2171	27.0869	28.8581	16.5496
905.456	118.849	0.156983	113.855	91.9789	38.2953	63.5135	131.569	118.589	43.6502	103.139	161.002	108.853
304.008	85.0272	43.1219	139.573	108.142	106.459	152.146	168.809	164.056	125.405	112.851	150.055	65.3813
905.963	99.9442	0	61.5601	83.2411	57.222	40.9173	163.943	127.488	31.9018	76.3919	116.333	87.7356
553.784	56.8231	14.1475	79.0598	80.6185	126.724	84.7371	144.202	161.697	82.3644	66.4183	150.852	120.041
142.07	45.8114	39.383	91.9654	62.1756	54.8785	78.4841	126.764	93.7951	55.0118	74.4155	57.3015	68.6892
141.09	168.992	425.955	335.12	206.777	328.577	189.044	301.224	311.285	177.07	293.073	158.386	354.714
180.533	16.6652	29.1774	37.5932	13.0494	35.8337	15.3864	28.4123	25.239	12.6589	29.5331	7.49267	13.9443
271.842	45.87	1.4016	74.5764	60.6907	72.5154	56.3901	121.824	87.781	48.2903	185.145	124.464	121.349
181.083	1210.06	2628.66	1967.26	1275.46	1998.58	1191.74	1883.35	1883.87	966.424	1693.76	957.002	1844.12
296.52	15.5297	0.465562	26.6855	19.306	23.4288	26.2765	40.7156	32.1226	12.2888	54.0199	34.3509	26.3813
443.773	60.8393	1.90868	76.3411	64.5939	95.085	63.0609	103.308	79.05	58.1524	97.1863	82.0678	75.0148
126.091	42.7901	5.08964	153.448	115.713	86.7742	96.9053	153.731	98.1655	57.8762	43.6607	43.7868	49.6806
126.59	5.44591	0.303043	21.2542	23.0325	19.9069	17.7118	33.0178	21.09	11.772	7.188	4.06883	7.03181
413.145	872.064	1331.28	935.883	976.512	991.08	1191.59	1028.8	1070.28	905.766	760.245	1171.22	586.138
414.141	204.321	366.541	237.289	232.041	244.088	318.746	262.742	192.093	197.689	196.899	253.399	133.876
616.33	277.954	234.938	605.249	781.126	283.443	183.324	903.683	491.614	520.463	258.987	544.269	714.138
590.754	34.7081	4.02574	63.0278	77.7265	36.9195	20.2047	122.464	77.5681	23.1364	41.3399	62.066	46.7749
299.664	30.3315	39.9025	72.4757	109.714	42.8063	30.5033	114.958	74.2464	58.5539	29.6435	108.548	82.775
308.668	74.1147	129.736	239.261	255.96	111.22	81.0069	204.839	147.215	135.207	74.7976	184.96	211.927
727.885	47.7825	1.48196	77.6973	97.5226	111.888	53.0064	265.196	187.293	55.0693	79.0699	103.656	76.5095
485.253	333.09	75.9772	547.527	629.544	549.035	382.734	1204.05	1096.98	372.393	608.25	678.925	559.763
568.645	74.1123	3.59448	372.893	215.834	106.047	34.9382	134.877	208.091	282.302	1010.86	198.5	403.197
426.486	100.464	3.68781	575.592	317.741	144.383	50.3823	203.06	262.502	400.383	1618.26	329.979	632.809
426.988	51.0401	7.79505	261.617	167.185	64.8215	35.7817	103.235	160.068	202.429	740.232	174.633	304.827
485.927	87.7176	8.94466	167.318	205.68	189.029	102.658	372.624	331.927	96.2528	191.11	191.205	164.468
485.593	188.213	4.6266	380.38	404.622	360.542	248.588	794.311	843.461	238.821	473.225	463.445	387.108
426.735	104.7	2.85143	537.195	285.335	169.064	50.5627	213.625	269.681	380.788	1436.01	306.658	578.649
399.7	94.492	2.37234	134.609	84.2604	174.178	116.424	158.005	139.263	68.7371	136.034	167.486	116.588
452.75	119.963	0.0661414	153.829	234.398	217.471	210.902	323.136	226.746	214.687	191.396	182.694	118.876
301.663	39.0715	58.3729	115.165	72.5017	59.4227	27.689	107.424	73.9135	37.6876	47.8769	73.261	27.9014
412.552	23.9415	5.09842	133.437	283.743	226.231	213.375	210.913	188.788	101.217	185.175	77.7909	61.6228
272.665	47.2815	3.12054	60.4048	45.5708	66.9218	64.0513	84.9189	58.3797	68.3832	147.652	88.4162	80.9767
847.375	36.5168	0.464977	123.634	200.311	229.395	283.688	212.449	150.06	82.2233	85.4691	71.4231	56.7861
418.903	45.7256	9.70437	83.3217	78.251	27.6061	19.3958	66.8919	75.5669	73.7646	244.134	83.2265	93.602
283.17	2589.37	56429.3	66213.5	21776.5	23445.4	22970.3	2091.45	1679.9	2307.84	2379.17	5249.81	1253.2
306.162	1429.48	10749.7	12290.5	7027.79	7573.05	7773.8	1258.18	998.61	1351.41	1337.68	2679.78	680.576
284.177	473.809	7764.82	9202.53	3191.54	3518.77	3685.98	387.63	355.596	445.056	376.759	820.765	220.842
305.158	9538.15	77862.4	86940.1	51186.4	53043.8	54973.8	7036.44	6003.79	9271.43	8235.44	18179.8	3408.62
321.132	509.394	5405.41	5006.55	2696.31	2225.24	2697.21	523.762	429.688	620.448	656.883	926.32	268.99
307.163	300.01	1872.35	2115.7	1234.05	1357.4	1373.44	305.959	235.769	260.616	268.957	557.893	174.44
437.506	30.4014	8.01077	49.4818	81.7075	44.821	47.8832	72.6598	55.4385	38.5715	73.5904	76.7599	37.4391
308.185	715.169	349.926	1095.58	423.611	638.214	377.538	1670.4	890.929	225.972	464.805	288.706	999.178
435.497	135.022	5.44998	165.198	240.263	186.074	129.449	327.969	208.328	135.922	263.775	307.588	167.489
440.487	139.046	0.865299	188.36	226.545	175.618	177.591	421.71	210.27	185.665	247.045	299.673	150.647
655.751	150.729	2.92796	168.931	222.631	162.601	191.286	425.971	225.968	157.208	207.354	236.804	167.423
645.259	758.097	897.532	1248.96	1275.18	1130.51	939.753	2475.08	1125.71	760.963	995.246	1252.98	875.351
633.766	3854.7	3.30178	5470.68	5809.2	4968.89	3315.79	12547.4	6097.97	3788.29	6006.25	6932.76	5049.38
440.816	195.372	1.07791	265.728	319.46	253.32	203.992	446.133	270.398	255.706	341.179	412.027	197.111
441.493	69.9306	5.22539	92.1843	97.8018	83.7409	91.6047	171.056	109.116	86.5086	116.179	142.451	77.102
320.138	152.457	201.521	249.732	335.268	236.701	216.264	250.568	210.878	190.414	207.534	543.253	232.126
634.267	2598.85	81.7916	3690.27	3913.72	3286.1	2152.79	8090.12	3991.51	2493.87	4040.39	4826.89	3260.8
319.137	546.214	741.968	583.852	1344.2	783.643	877.012	1073.18	891.105	703.181	1124.53	3006.46	653.487
660.721	444.744	9.92388	449.271	649.056	488.008	344.288	1009.73	578.353	531.69	609.663	741.321	473.645
645.762	293.035	0.790972	298.785	387.903	382.63	324.3	1019.85	455.752	303.47	430.134	538.912	367.338
634.769	990.393	0.35918	1430.53	1525.46	1189.57	821.317	3109.12	1572.07	989.836	1593.74	1686.41	1263.69
644.757	1082.55	0.217198	1177.27	1467.26	1384.77	1016.9	3659.7	1670.96	425.234	1520	1939.99	1250.78
653.244	252.232	105.76	268.009	333.979	230.558	257.612	658.676	392.057	308.154	341.577	395.619	321.919
635.27	363.667	54.3049	448.799	594.906	450.041	393.947	1015.42	536.112	375.138	522.694	592.206	464.844
736.315	132.789	16.6301	224.482	257.985	203.88	198.827	622.19	299.343	168.489	176.506	207.491	148.576
652.735	371.54	2.45825	468.092	504.623	413.379	301.815	897.705	472.634	372.936	505.068	551.763	440.986
660.232	413.248	17.3216	412.202	634.761	437.315	447.201	1114.98	553.944	499.006	501.42	636.264	428.626
287.663	18.507	17.7128	90.0217	136.367	148.497	78.4839	66.9598	60.33	37.1586	40.9618	37.2266	32.4366
661.7	156.942	4.27173	152.386	290.088	264.672	194.243	356.452	231.652	196.317	226.939	239.503	153.645
661.251	353.918	154.976	437.126	570.453	490.957	416.987	713.576	475.377	426.852	421.824	474.834	336.179
130.158	49.5332	13.7793	32.4267	46.8642	42.4859	25.5312	38.0228	43.6788	33.043	56.4293	47.864	47.0048
366.696	88.5915	11.4778	110.85	122.35	223.555	258.146	129.464	111.955	130.344	59.4062	130.725	46.291
527.925	281.136	2.56545	1338.92	2417.53	1147.67	921.061	1760.56	2046.49	2202.19	2524.21	862.575	997.85
528.59	61.0165	0.409159	235.75	408.761	234.015	150.641	332.407	352.034	331.22	399.293	165.635	161.017
527.591	347.493	5.52432	1663.58	2942.73	1447.61	1171.67	2085.21	2383.42	2558.01	2894.91	1014.97	1223.08
528.258	187.979	80.0487	735.984	1204.1	734.472	519.296	992.143	1080.3	1081.52	1207.27	454.623	547.12
395.948	16.944	23.4563	87.2187	96.3986	58.2209	29.6542	50.3369	78.796	83.8997	64.6349	59.5018	30.972
790.885	107.503	0	553.359	1058.35	596.584	450.503	719.94	826.455	946.412	821.149	350.968	382.135
283.83	125.122	44.4358	154.613	141.794	400.121	622.519	81.8548	132.313	183.146	69.3012	136.354	48.9868
791.383	125.46	18.8115	507.166	890.527	471.265	318.139	579.646	692.888	780.117	645.02	288.68	346.461
425.741	237.842	14.0492	221.713	214.578	616.602	811.707	153.86	211.416	299.425	108.322	212.545	84.6061
732.363	148.054	25.7618	199.352	190.266	281.828	162.458	264.094	227.009	198.427	151.248	218.81	139.228
653.639	567.928	2.50245	1191.96	1473.06	2157.02	1779.65	1869.25	1561.3	1021.66	888.022	840.759	753.528
654.639	140.991	0.592801	342.142	344.431	498.444	451.421	426.122	341.567	248.094	209.053	187.716	178.037
493.909	171.146	2.69289	856.068	1525.67	860.426	872.789	610.721	880.198	883.942	982.262	493.294	401.27
654.299	343.231	60.1154	747.038	929.283	1248.06	988.395	1017.57	880.628	632.734	493.774	524.257	425.516
494.58	62.153	2.69124	292.999	493.609	306.622	294.009	233.935	302.454	297.636	355.301	158.644	149.703
654.978	54.2841	8.95208	126.245	155.012	199.134	208.343	179.457	143.826	102.35	114.062	90.1775	75.6127
494.245	317.045	78.3644	833.793	1257.76	950.522	832.944	595.754	903.36	778.934	817.024	579.393	465.693
503.959	37.6775	9.83905	43.1177	65.0305	67.1488	68.126	74.1937	57.1648	79.107	40.4556	48.4319	25.5516
653.969	535.079	14.8891	1169.64	1460.4	2017.67	1823.29	1721.66	1458.38	955.186	812.235	781.082	657.782
740.347	120.326	36.9141	396.807	788.982	490.126	476.002	424.276	423.865	458.674	391.695	242.191	238.733
658.957	62.4444	0.906455	117.614	142.378	79.0636	125.88	177.412	192.661	200.878	209.639	257.226	168.991
741.348	66.0067	20.4109	210.737	332.722	261.156	232.574	179.853	219.464	220.711	145.778	147.003	103.919
166.047	134.803	84.3133	59.6226	114.445	126.217	30.311	132.695	62.9126	41.037	53.1274	151.356	74.7233
432.723	87.6535	2.08731	39.5529	64.8698	119.793	177.465	193.747	104.09	154.777	176.619	158.058	120.247
431.726	391.088	6.40822	246.682	364.479	447.087	419.099	951.928	463.23	696.844	897.096	768.889	612.258
635.615	44.5828	3.66396	84.2908	140.468	181.061	169.579	150.415	136.436	150.34	118.778	103.485	64.2406
994.117	10.8667	0.535723	72.3451	249.394	129.503	269.209	31.389	89.2226	199.002	257.962	31.723	27.2593
160.169	79.2984	50.8455	152.592	14.2638	59.3064	35.5161	116.372	87.76	4.44677	19.7502	24.3812	173.402
828.263	162.558	25.988	271.878	1148.37	475.884	1315.86	215.081	415.673	836.921	1485.88	208.042	219.893
993.706	52.2145	0	94.8423	445.562	197.832	503.843	74.1082	149.406	368.432	485.317	73.6679	59.219
827.927	116.122	0	205.762	743.755	391.729	1020.24	145.569	311.033	673.553	1244.88	146.351	191.609
605.663	68.493	3.33139	157.944	227.852	272.788	211.702	219.944	207.973	148.767	173.993	159.153	93.2589
234.149	501.042	387.146	1678.84	531.035	780.443	474.326	2114.67	1213.95	355.709	664.069	369.462	1168.29
666.295	117.868	68.6075	190.439	361.11	292.748	340.29	294.958	292.191	293.785	215	212.32	181.486
235.153	99.3906	66.3142	289.156	60.0319	146.898	76.6079	404.319	185.951	40.4381	117.554	57.322	178.972
464.95	50.3956	2.33879	54.2157	88.5289	82.3178	122.108	78.0456	74.0768	75.4652	67.0337	77.1058	38.2154
716.305	128.019	643.754	210.44	211.199	191.755	152.095	231.248	177.376	132.401	90.9758	128.199	138.404
658.625	87.3268	2.02259	189.293	231.23	106.99	118.452	437.879	242.121	373.279	333.983	447.743	316.807
370.748	34.5781	1.89411	82.5112	102.523	118.9	107.914	97.0283	72.8178	90.3145	93.9153	59.3715	39.8262
666.662	80.0157	9.04878	145.44	252.008	156.946	131.916	158.934	126.19	95.7925	137.436	127.315	96.4064
371.373	20.0678	0.464967	42.3078	99.6613	121.126	107.165	35.1177	53.8285	62.915	54.8149	38.1932	36.892
676.981	83.2168	0	300.015	275.102	250.834	155.152	247	211.734	169.091	160.33	143.353	224.881
456.46	37.8875	0.632429	116.095	146.343	192.802	177.134	112.565	141.559	123.37	65.1136	88.4218	37.6119
926.873	145.135	2.45831	256.419	462.207	550.614	520.193	310.257	318.667	355.162	197.193	268.083	109.053
711.658	75.9112	2.50689	215.268	98.6557	182.734	115.693	141.096	140.1	83.4609	91.0215	88.8019	93.8183
445.469	11.9205	0	49.1964	83.7333	98.1793	100.951	88.6628	105.326	51.2299	44.2594	39.0687	24.6177
677.992	56.0256	20.8682	91.3768	140.526	137.1	91.2706	140.381	119.541	72.9413	83.3744	103.38	75.0255
681.654	840.26	1.255	2827.56	1226.31	1710.77	844.742	2186.95	1795.68	840.708	939.376	674.759	1487.91
671.65	123.064	4.88214	387.645	306.948	286.135	229.426	354.308	315.957	239.904	241.705	248.663	274.331
459.953	140.017	5.51053	298.443	436.659	528.041	496.433	359.549	444.279	341.391	351.171	305.275	219.93
677.306	155.722	48.6642	361.17	284.153	338.85	340.41	379.721	246.086	244.976	209.936	219.076	215.132
682.656	351.856	0.655843	767.875	422.781	587.436	321.586	828.369	595.359	283.915	320.521	261.465	508.25
704.309	90.5868	41.8929	206.079	281.201	259.675	215.972	276.23	215.958	120.312	132.027	169.14	141.06
681.987	857.79	14.1132	2782.69	1168.97	1544.98	867.404	2188.24	1688.21	792.163	809.742	574.473	1589.18
460.456	41.5136	0.696083	99.5589	120.96	129.454	127.055	96.3412	103.315	74.8036	71.8841	69.5678	32.6135
667.306	160.723	77.0403	458.779	382.663	416.158	337.618	506.513	320.501	224.191	278.91	251.597	273.173
682.98	176.345	0.668905	350.699	186.96	204.966	205.325	401.194	250.47	184.651	138.995	120.067	224.456
687.316	181.317	57.3565	395.982	259.868	331.25	234.813	349.407	285.981	184.289	220.265	209.802	278.477
682.319	595.78	42.4597	1662.27	742.736	1121.37	607.538	1534.46	1193.86	563.994	579.484	477.202	1081.77
367.757	55.2451	0	127.997	124.843	183.346	176.315	103.927	157.445	108.619	94.0357	109.765	48.345
462.948	61.72	7.1642	112.303	163.777	166.041	160.665	122.534	116.774	127.27	161.124	122.381	66.6323
598.755	178.182	0.393987	468.553	753.188	873.832	794.034	615.752	621.266	445.006	361.41	406.83	228.112
448.82	37.9569	0.280959	123.731	184.344	215.957	171.781	158.693	133.474	133.243	81.3826	131.615	54.6928
450.215	1623.55	115.416	4279.51	7424.29	9127.54	7734.65	6406.52	6389.17	4686.14	3053.46	3702.52	2277.22
450.718	385.487	1.44784	911.44	1451.66	1877.63	1526.3	1225.56	1302.25	992.653	636.372	730.511	472.841
473.967	34.8181	13.5353	50.3956	70.2416	53.2014	54.3918	42.8737	40.5738	45.8018	36.3437	60.0363	15.5043
462.452	44.9115	0.127479	52.6263	113.084	106.945	98.0222	115.537	86.4651	77.8005	85.5306	81.1085	55.2085
455.967	196.058	59.9087	459.008	610.402	765.907	703.66	510.314	607.372	445.812	358.588	360.913	177.389
709.657	150.719	6.59723	289.268	513.891	389.519	535.896	311.406	304.34	407.41	570.632	210.461	202.385
599.617	38927.6	5.74058	94134.5	143207	177406	158161	129948	130853	97688.8	74874.1	83718.6	50953.4
600.285	16778.7	61.613	36192.8	55474.8	63399.4	56797.9	48221.8	58937.9	40564.9	31037.4	34632.2	21826.6
449.964	1794.96	45.4639	4672.64	7864.28	10256.9	8839.53	6866.85	6804.06	5308.26	3322.37	4065.35	2469.46
600.953	2129.11	1.24229	5054.98	8315.2	9901.96	9094.38	7164.91	7121.49	5338.23	4199.35	4766.27	2858.72
450.466	851.39	4.24751	2175.3	3618.42	4565.34	4232.66	3150.4	3346.54	2444.92	1603.45	1849.37	1159.58
606.943	1048	0.420013	1942.8	3131.96	3631.7	3877.57	2991.48	2895.45	1963.14	1653.25	2061.81	1009.03
607.277	1004.89	71.9711	1726.74	2903.24	3682.03	3436.06	2802.57	2676.55	1821.94	1695.24	1926.11	1077.6
455.461	225.196	2.9467	496.876	858.656	1231.35	1183.33	791.409	776.571	672.435	414.721	495.346	272.182
455.71	236.161	6.04593	446.79	819.026	1062.57	1000.85	745.799	728.185	620.404	367.35	465.77	245.836
898.921	14880.7	3.9544	36901.3	62794.8	80060.4	70179.5	50521.8	54847.4	44559.3	25885.9	29872	18840.5
601.282	756.292	97.4194	1482.49	2353.9	3014.3	2874.69	2173.16	2144.15	1524.37	1162.21	1477.05	978.641
612.932	360.866	0.934191	545.624	739.179	845.443	807.957	544.841	686.553	518.367	444.769	512.155	346.35
666.981	124.703	31.5505	396.235	405.621	322.601	224.648	438.22	335.705	198.835	201.373	206.593	239.539
464.445	104.349	1.27234	180.193	221.988	214.021	221.048	183.921	216.325	183.912	155.945	182.86	76.8929
599.952	32049	5.62046	81713.1	150222	199956	158560	130054	112940	80640.2	68195.3	82598.8	40605.8
899.423	13560.8	8.16297	33797.6	56659.5	71291.1	63087.7	46058.2	49761.5	40159.2	24085.4	27940	18042.2
899.924	7296.16	0	17801.2	29269.8	50968.5	37342	24378	26442.6	21232.9	12609.8	14974	9496.78
600.62	6902.71	2.73347	15878.4	23289.8	28743.3	25695.5	21126.3	20998.8	16313.3	12813.2	13927.4	8989
597.754	741.114	1.65421	1874.76	3101.37	3479.75	3228.76	2487.82	2564.42	1752.64	1342.41	1648.89	945.531
598.089	702.984	84.1191	1656.34	2596.86	3223.45	2924.26	2190.63	2252.62	1674.02	1292.33	1462	960.288
598.42	397.838	34.2659	921.46	1432.95	1803.9	1587.41	1308.13	1421.19	921.061	771.16	754.832	477.553
925.88	380.353	2.00302	694.808	1128.37	1286.64	1226.08	900.691	972.658	1033.9	599.176	647.428	335.998
926.381	277.792	3.74293	474.231	802.937	904.499	757.832	567.538	624.186	602.817	389.523	479.719	235.549
896.625	155.784	3.93167	390.907	705.534	859.828	695.999	503.902	610.82	457.16	253.354	330.913	286.499
667.65	125.66	5.04815	290.619	208.69	235.357	197.992	285.393	219.219	149.166	158.724	223.611	159.453
677.649	79.2249	2.70351	212.843	149.014	238.616	126.879	232.836	187.583	166.439	121.449	167.038	140.731
312.192	1890.63	127.829	1881.93	1731.68	1978.55	227.501	3230.68	1539.8	1330.1	399.866	1754.73	930.559
910.41	261.86	8.87004	505.018	671.362	946.925	948.103	649.542	730.16	484.902	422.9	473.809	256.985
617.589	1106.9	0.955364	1711.27	2526.79	2682.65	2378.91	2015.33	2267.96	1973.04	1838.64	1809.13	1013.28
607.611	645.946	2.59085	1146.52	1743.74	2206.68	2206.64	1588.6	1680.48	1209.82	1119.8	1229.96	664.778
463.442	644.774	11.115	1131.86	1736.56	1816.24	1809.19	1319.2	1490.56	1341.53	1238.02	1311.44	644.145
617.923	698.672	1.0795	1213.77	1701.51	1765.69	1689.17	1266.89	1531.61	1471.21	1215.69	1237.96	694.164
463.192	535.151	94.9763	916.381	1428.68	1379.01	1314.09	1283.03	1193.04	1110.9	927.338	1125.56	521.678
612.598	617.448	0	999.899	1344.83	1436.39	1380.56	1018.41	1222.77	902.265	915.388	979.162	598.341
463.694	407.647	5.82094	743.921	1180.57	1360.87	1206.12	923.811	1078.55	960.379	821.093	860.924	420.035
459.451	347.942	0.12689	687.868	893.144	1100.07	1041.57	736.117	891.808	603.638	662.021	714.985	389.489
459.702	313.54	3.84649	629.571	863.707	996.423	909.267	635.917	762.959	594.488	624.763	590.817	344.821
463.945	273.123	5.83041	490.962	730.765	774.837	802.278	520.449	655.736	596.49	468.543	541.892	249.801
910.908	213.517	0	335.154	464.208	592.884	706.369	445.358	484.858	359.048	242.902	332.288	152.465
360.378	21.1249	0.449982	38.7472	52.8736	67.337	65.9161	49.1343	41.741	43.3025	33.5759	26.8909	25.0174
925.379	276.909	10.0051	537.143	924.015	994.938	899.708	706.293	683.388	806.443	546.141	576.935	290.916
370.961	69.086	8.80306	129.622	203.087	188.572	206.864	148.784	136.603	157.743	142.859	114.395	77.5543
691.329	204.53	50.9282	648.499	443.603	443.772	276.054	611.433	461.151	330.88	251.201	250.503	447.254
685.655	157.678	1.47385	307.348	339.933	315.632	246.733	330.303	266.09	205.528	143.388	167.157	242.923
618.255	449.611	47.7394	749.359	1103.16	1191.37	1014.6	822.056	975.609	891.595	698.394	800.308	485.089
601.603	210.09	2.92975	534.81	765.226	1033.44	987.952	657.036	762.73	488.917	449.904	468.639	242.239
616.914	97.0223	0.282552	193.385	213.177	295.697	249.324	212.152	184.58	183.299	133.198	176.145	106.561
672.977	107.991	0.571746	173.366	173.218	133.602	111.218	166.304	182.919	100.281	108.223	116.125	110.85
460.955	99.3893	6.75876	210.093	304.289	335.313	323.294	234.102	292.254	214.799	238.856	261.262	110.364
676.316	124.252	39.8602	268.479	360.956	289.414	220.208	281.667	305.517	270.048	276.789	262.923	229.678
985.92	730.657	0	1064.36	2826.31	288.966	488.567	5465.88	1234.47	5388.07	2894.07	4664.77	3429.86
686.659	319.645	3.12379	802.03	496.089	684.737	347.02	675.184	579.249	331.521	328.207	286.216	515.239
616.59	96.5257	5.56402	148.867	192.911	204.597	198.483	184.622	179.623	226.824	175.648	199.498	86.7879
695.991	118.454	7.97951	436.216	303.08	407.544	203.93	482.366	348.03	203.278	219.05	176.47	283.367
461.458	80.9555	1.37331	124.821	135.771	143.122	145.07	115.515	163.803	98.8727	88.2092	119.764	97.0664
658.283	457.019	235.962	315.385	433.45	213.388	168.828	992.931	315.73	804.775	527.063	802.228	581.569
687.661	115.951	2.95591	252.539	149.725	245.196	146.621	174.942	214.515	133.956	124.189	190.508	220.827
694.988	86.2191	0.933252	200.14	275.852	248.277	145.335	197.161	176.789	105.719	101.446	143.227	116.527
918.88	87.9738	2.17667	149.355	210.681	382.207	264.983	140.76	212.192	144.458	115.564	157.03	74.0047
462.695	91.9925	4.73522	133.674	297.669	231.444	195.092	278.2	203.131	202.279	112.74	140.995	84.0656
688.002	53.6242	14.2206	135.475	72.3333	85.6034	81.9423	148.727	118.837	63.8814	105.716	92.8259	90.4957
680.65	73.2417	5.43111	134.674	155.091	193.346	123.682	158.723	122.933	89.5922	85.1016	127.054	88.7459
614.605	202.886	1.01189	274.989	399.153	483.426	513.298	278.825	397.703	274.558	316.847	353.498	178.41
617.254	884.403	74.8909	1281.81	2008.48	1912.27	1777.77	1659.21	1632.66	1461.73	1234.98	1419.8	789.095
695.658	187.686	3.28592	458.178	334.6	446.95	253.117	413.931	308.179	179.924	174.737	202.059	375.681
705.996	114.194	17.4699	367.102	249.097	290.38	189.547	370.913	240.694	179.652	211.452	130.832	256.593
618.594	241.225	4.45053	361.591	523.463	548.66	477.478	378.53	434.995	454.162	421.704	384.069	190.459
686.321	332.531	38.0654	909.764	626.233	666.661	419.229	822.971	603.996	358.01	379.445	303.737	567.212
697.973	67.4103	0.601861	156.096	176.654	172.839	107.474	136.298	163.83	112.913	97.2746	95.5657	79.2769
716.977	89.1237	0.915004	116.919	125.311	157.598	128.925	133.239	105.852	82.4843	83.9741	68.4836	120.283
665.618	105.317	1.57211	128.034	248.928	104.976	82.8441	485.032	170.997	365.94	339.842	380.555	234.297
986.422	613.824	3.07404	1033.47	2734.87	325.436	455.786	5511.57	1178.2	5290.01	2710.77	4333.4	3445.61
688.636	89.0409	1.75382	120.641	142.944	125.73	116.921	98.7515	121.076	109.791	119.754	101.86	107.632
700.996	200.18	0.677675	459.93	302.749	306.032	266.073	369.776	293.2	187.736	231.708	173.803	290.26
657.62	190.117	2.40985	400.166	752.958	193.342	215.689	1544.67	383.463	1321.03	927.966	1319.41	924.682
367.969	42.9673	17.1393	116.498	146.705	169.013	124.797	143.103	122.748	95.8692	76.2676	84.0875	79.2097
629.574	99.6562	1.5746	107.061	146.291	222.975	193.57	145.378	161.186	154.192	104.442	132.664	74.1546
900.408	3186.18	10.6733	8100.25	12803.4	19062.6	18057.5	10301.5	11429	8899.48	5455.05	7197.48	3844.92
607.936	315.824	0.292553	632.236	821.009	1069.3	1080.93	812.251	908.783	564.676	545.904	652.072	340.723
699.31	143.275	63.7979	305.964	306.455	309.202	243.347	292.645	234.881	201.899	179.714	175.939	149.408
986.923	369.476	0	699.793	1654.09	230.469	296.739	3548.72	782.909	3241.22	1782.91	2513.18	1872.81
266.138	151.246	174.53	397.832	116.496	188.339	111.26	416.16	225.729	81.2124	125.21	173.891	271.819
710.998	102.128	1.29713	233.404	242.987	232.27	149.338	210.129	211.671	157.848	131.197	115.966	133.192
721.976	57.3976	0	94.7579	117.93	127.055	122.044	133.832	164.117	57.9195	86.1802	121.158	70.9411
699.996	162.494	9.69896	341.208	362.123	329.55	160.912	280.498	257.995	114.581	164.897	179.609	203.367
681.304	138.687	65.0844	346.955	387.564	328.453	250.522	414.571	285.107	210.783	340.203	204.28	309.092
613.599	85.8356	0.564253	159.811	197.732	236.113	232.655	229.726	185.864	165.437	161.753	161.876	85.918
696.323	197.407	56.7044	472.563	379.999	463.792	208.134	528.705	404.459	221.453	219.567	222.161	355.591
664.942	123.381	1.55435	159.927	381.232	118.184	107.008	720.718	169.402	574.343	536.029	623.656	385.614
464.197	224.505	155.105	329.568	444.115	509.851	428.289	329.679	416.63	362.385	334.189	341.218	203.026
690.995	266.198	9.1611	691.234	433.14	531.029	301.578	638.31	448.6	255.908	246.482	260.122	414.95
696.66	117.145	0.469719	367.927	254.402	348.702	176.327	313.684	241.177	158.247	193.005	131.217	249.773
699.656	179.071	3.83533	287.941	313.315	301.894	160.393	297.643	221.17	128.928	158.808	177.18	217.844
686.996	262.266	11.974	644.842	404.467	483.819	271.165	545.498	480.543	257.511	320.997	226.398	371.793
728.652	45.2311	1.29395	93.2679	161.15	121.274	83.7127	134.763	87.2863	78.7492	127.006	81.7223	79.2861
680.986	111.393	0.421086	246.48	295.587	345.341	195.717	333.403	229.864	189.943	157.844	159.612	154.893
657.953	206.294	1.33747	351.142	809.403	152.572	149.017	1481.05	395.188	1170.13	913.14	1174.15	913.357
688.987	64.8858	13.1564	173.205	126.983	197.547	115.329	228.336	137.056	101.594	117.522	78.9788	163.822
700.317	213.028	59.0844	551.827	443.422	459.121	270.206	559.33	361.318	194.057	251.006	220.411	294.965
705.319	164.769	48.017	358.39	343.655	316.858	245.949	343.575	281.325	173.741	173.614	179.107	205.891
697.647	80.0998	6.25493	169.238	188.452	214.284	139.019	199.46	186.947	123.455	167.141	162.809	113.218
725.66	92.3689	1.7082	114.789	165.622	161.301	111.959	138.839	126.533	81.0253	77.1676	83.5376	85.1296
729.674	50.3806	1.19964	112.011	137.26	142.228	120.732	142.474	130.163	105.826	73.5274	93.2303	89.3918
714.659	96.5392	2.33014	144.15	171.453	169.659	120.45	178.644	111.179	100.515	125.7	145.714	98.6636
705.666	158.559	3.47975	418.938	312.141	280.366	181.596	353.786	237.432	143.611	176.056	117.744	233.839
612.265	677.719	35.1281	1184.23	1597.78	1828.5	1564.33	1281.06	1523.33	1067.33	1076.02	1072.38	650.877
706.66	88.4078	2.10688	262.111	192.552	212.912	152.949	211.802	167.571	122.922	162.37	110.389	151.845
613.941	54.5364	3.681	108.442	145.498	214.647	165.679	126.195	141.175	112.608	123.122	115.631	56.7386
691.997	178.181	2.00011	554.39	304.325	401.951	237.615	504.805	304.552	161.722	199.112	200.627	394.376
698.992	138.605	7.34707	205.969	236.186	254.969	71.7457	164.768	138.951	114.268	105.91	152.196	153.23
689.974	48.2818	0	191.371	181.412	139.262	141.896	183.067	131.45	110.537	110.591	136.508	109.48
742.656	34.71	0.886676	116.072	116.41	79.0867	105.217	96.196	105.751	71.5051	70.462	69.3532	66.2955
663.96	17.1783	4.57993	54.5105	55.9435	75.1344	57.4571	54.262	70.6046	66.1103	48.7234	64.1184	49.518
701.318	170.745	54.1012	386.388	243.75	329.074	196.506	401.333	257.736	155.272	155.704	158.747	245.494
704.672	82.0905	2.37493	113.582	233.83	188.192	72.8969	173.723	97.0849	69.155	77.0097	83.3339	55.4905
691.664	283.647	2.50891	794.987	442.488	536.269	301.463	754.227	514.913	281.467	293.463	243.304	551.299
700.663	173.866	8.1591	413.58	285.785	277.164	167.734	364.311	295.662	165.511	181.856	217.015	218.946
692.314	171.545	36.1596	409.167	271.342	331.337	221.766	372.089	255.827	153.555	193.994	218.396	275.795
714.996	98.1043	1.00885	239.311	224	197.226	174.783	250.777	235.593	149.905	141.191	129.691	167.55
710.661	125.293	5.81224	258.598	355.19	310.995	298.34	346.025	235.127	316.339	296.619	162.228	165.566
685.988	149.014	0.348349	285.749	336.387	341.968	249.816	324.33	277.97	195.195	183.865	184.496	226.205
712.977	82.4156	1.29257	121.472	148.179	125.342	135.139	119.808	140.158	107.996	112.839	98.1402	93.2154
743.658	62.2475	1.8557	69.3932	109.55	113.486	108.481	85.5877	95.1773	62.3087	76.514	81.8871	74.007
723.656	96.6442	3.33916	129.179	174.305	215.094	240.557	180.645	183.816	132.919	101.399	148.253	102.901
690.308	171.361	48.6061	312.015	340.298	331.134	235.8	329.457	246.964	181.118	169.073	207.153	261.285
718.994	86.8248	7.18683	187.18	143.776	181.163	151.899	241.237	190.271	82.4357	130.822	154.681	90.4689
696.987	130.745	1.81683	277.348	214.327	229.047	185.345	275.464	221.49	127.855	160.269	155.016	167.94
716.654	65.2955	3.02382	159.869	151.566	149.136	80.8778	125.904	128.976	67.959	97.4998	101.388	98.5276
740.663	49.2909	1.9196	134.421	135.217	130.533	106.278	105.482	106.876	73.7917	77.8931	85.2691	86.0014
698.645	50.6758	6.41009	117.261	141.586	169.692	82.9394	152.981	128.523	89.1165	66.5458	92.4207	84.641
481.707	88.9866	4.91581	122.7	207.414	163.837	158.239	179.743	174.886	180.11	148.799	152.71	138.149
720.326	117.902	32.5626	218.877	208.882	257.722	196.415	234.803	182.688	116.002	120.836	123.659	140.071
692.653	89.245	7.81957	263.56	155.798	152.462	119.211	207.903	157.708	73.4588	103.836	143.242	151.115
721.665	77.5189	4.27317	128.305	124.371	176.22	144.684	142.341	140.421	114.481	100.252	139.664	118.813
733.66	51.471	1.46848	119.984	140.638	134.444	132.525	143.234	161.875	101.187	131.035	111.125	89.8004
689.644	130.557	4.28122	154.051	163.955	164.36	104.725	219.852	167.242	127.792	98.8456	106.609	108.15
727.661	77.8234	3.86295	77.8414	157.841	152.476	75.3021	103.604	101.821	84.2765	95.2944	108.969	69.0252
917.856	198.384	0	376.105	474.234	676.223	681.827	295.739	448.273	317.198	288.654	269.092	181.537
715.662	93.3847	2.56357	209.011	207.258	193.241	174.036	276.159	149.216	141.81	143.505	129.044	142.046
962.399	138.804	11.745	197.441	280.151	187.748	258.035	262.508	304.222	303.446	190.114	155.059	119.251
670.602	84.7854	6.46411	143.576	170.536	109.907	86.0301	286.328	102.302	315.441	251.083	278.889	217.734
670.978	108.849	1.93408	373.718	227.464	222.37	161.987	280.056	234.633	237.053	219.871	232.577	245.504
721.002	66.3516	5.67477	197.629	136.717	148.503	181.486	198.706	211.711	115.681	108.187	106.146	120.699
731.655	69.0316	0.519904	95.1591	110.309	124.143	93.1076	143.876	100.399	85.544	75.1076	99.401	60.3023
716.001	89.7509	14.7795	197.882	196.082	209.127	118.827	189.906	172.091	95.0703	100.283	97.4064	149.379
900.886	1197.62	1.24176	3608.05	4651.92	8877.4	9183.94	3988.09	4741.73	3148.65	2182.18	3221.02	1456.89
726.661	64.2588	9.38564	122.614	135.618	159.546	124.601	150.743	107.966	90.6612	85.3409	96.3025	56.3521
720.661	88.373	4.94069	202.717	144.467	159.755	146.338	199.215	135.511	94.5552	118.512	99.4156	105.998
703.647	78.6635	1.71707	165.136	204.746	168.673	133.179	150.595	126.3	84.1437	98.8	126.491	92.9642
684.642	42.9738	1.80435	129.508	98.5881	127.547	121.617	114.949	141.378	131.169	99.5629	75.7994	69.9801
713.651	111.498	2.68699	173.553	175.363	174.012	160.996	157.364	191.242	117.858	179.271	206.132	153.573
623.952	39.4756	0.989068	153.996	241.178	304.844	194.462	169.826	138.874	187.189	154.336	91.9933	117.196
608.574	78.3479	2.4191	182.183	221.453	326.034	278.286	221.516	219.939	192.2	146.047	185.199	85.8071
708.987	91.0559	0.317236	242.317	200.763	203.772	195.724	232.51	253.926	117.898	154.972	187.033	154.494
719.664	90.8654	8.61447	184.894	167.31	186.209	161.642	273.56	138.04	107.707	113.57	87.1474	109.068
638.28	214.495	73.3004	307.375	311.895	595.286	377.906	318.133	588.152	429.839	314.474	407.655	395.201
709.312	148.43	31.1957	251.789	222.197	275.256	247.833	277.016	236.594	156.449	156.684	190.939	166.996
708.653	97.2865	2.94764	224.073	204.93	225.042	209.887	207.678	155.369	114.322	146.147	150.299	130.14
703.992	70.8033	9.11093	190.993	230.157	150.671	109.863	148.822	140.422	90.0931	113.628	115.175	96.0017
524.764	167.738	8.1542	152.928	147.052	378.288	567.883	132.388	138.721	133.371	77.0646	156.371	93.1669
749.735	51.8787	2.82018	208.109	222.347	262.4	323.733	131.917	172.199	126.276	132.436	137.482	93.4611
713.99	107.631	21.7542	166.162	113.367	151.695	170.896	153.058	152.12	96.29	114.967	169.843	131.495
911.843	58.4161	1.28205	194.325	162.051	360.792	495.313	193.789	236.64	165.92	169.956	188.264	88.1687
449.237	317.67	100.103	316.3	1029.29	474.837	359.465	839.193	515.816	234.575	248.593	405.498	216.777
895.642	29.2188	4.68964	97.965	141.798	203.997	292.69	83.5386	95.2502	69.9211	81.9084	83.4808	64.6195
457.758	1234.2	0	1482.86	3023.77	3205.02	2722.6	2761.45	1930.6	1458.68	1261.52	1483.35	1098.55
458.76	183.603	3.91804	191.967	416.633	474.365	439.541	406.417	288.416	243.001	209.566	261.58	167.212
901.366	502.543	20.7511	1551.14	1638.83	3626.74	3975.73	1534.51	1746.71	1265.06	879.697	1437.47	598.83
458.258	640.845	351.726	774.47	1515.21	1463.44	1299.28	1381.27	944.609	743.446	711.301	728.967	653.73
894.121	88.8232	1.30672	432.131	346.104	1013.95	1181.12	438.287	528.493	234.686	214.35	342.626	131.649
895.372	51.5704	10.288	191.738	156.177	381.562	467.243	195.736	192.86	107.562	110.874	188.399	109.925
895.127	72.1262	3.84381	314.19	214.103	673.974	929.79	306.622	395.539	181.55	173.646	287.768	99.199
894.627	142.506	0	753.001	594.919	1639.96	1913.24	794.252	887.673	328.06	315.409	639.675	219.73
894.874	86.3893	3.7287	500.598	431.698	1153.5	1400.07	573.568	701.175	241.725	236.916	454.875	164.14
894.375	124.936	12.1043	737.811	675.89	1767.88	2003.07	804.419	916.709	360.237	325.687	661.74	184.006
902.3	93.3299	17.5054	268.316	265.105	503.558	461.373	222.745	276.64	213.259	106.033	259.941	90.8513
350.536	150.893	5.3476	112.518	123.407	322.005	498.779	77.9926	84.7938	97.177	72.4224	142.516	49.7011
296.141	414.767	283.979	739.343	599.099	769.711	769.843	1124.77	747.887	535.437	620.222	617.392	673.035
461.715	124.884	13.0263	122.975	181.819	303.919	224.735	183.859	228.043	152.572	135.9	185.739	105.347
605.884	151.819	1.66716	502.574	409.498	1034.04	1048.85	422.934	506.395	324.075	338.992	517.216	158.907
295.129	1806.11	1363.65	2587.82	2798.37	3722.77	4337.31	4513.47	3520.74	2860.29	3284.76	3028.47	2734.3
849.843	73.1065	3.26379	610.994	306.326	1158.86	1377.76	399.12	468.308	296.677	261.914	501.821	200.998
610.857	133.12	2.94172	459.88	494.601	1040.88	1039.01	374.504	498.378	373.143	294.014	530.479	186.08
850.343	68.3487	24.8055	270.684	141.353	487.621	537.846	161.154	91.701	167.081	130.872	260.717	109.142
593.561	242.353	0.600965	864.553	847.786	2008.65	2173.28	790.38	992.225	484.133	538.161	886.533	330.463
593.902	132.882	3.78636	613.305	599.073	1296.5	1278.69	568.342	637.473	330.022	316.599	527.098	237.891
917.286	105.111	18.8528	344.17	271.608	622.662	660.31	213.114	349.387	223.132	184.07	317.847	155.245
611.86	102.367	0.657989	369.635	357.488	797.04	793.711	278.816	377.096	305.669	223.864	371.298	126.048
901.813	150.245	0	581.347	440.852	1189.82	1402.57	455.203	538.566	350.822	300.798	508.502	184.439
909.31	93.3617	13.8662	254.109	206.961	521.236	564.325	214.643	286.071	199.288	159.031	264.783	100.996
886.556	41.2406	1.59973	93.3385	102.915	267.765	282.713	118.42	77.0635	79.0312	82.0446	108.969	68.6565
594.215	117.691	59.9311	261.092	237.298	570.986	566.297	261.232	291.959	193.493	147.984	267.93	100.075
611.519	173.58	0.763344	456.633	429.467	1132.94	1145.79	308.074	533.088	409.088	342.719	583.559	182.386
908.798	101.783	3.97168	442.807	346.395	781.842	839.758	304.259	395.483	229.654	262.831	377.619	193.341
891.329	187.324	17.1906	749.202	582.429	1500.42	1730.5	487.826	745.182	418.271	415.612	625.948	234.194
908.302	169.727	18.5338	455.668	423.648	980.163	1085.3	358.894	442.005	313.772	329.534	436.354	243.52
890.826	467.107	0.579403	1915.86	1448.51	4309.64	4551.99	1417.05	1792.09	1068.71	1025.48	1788.56	669.747
889.324	2367.21	15.1264	9647.35	7374.11	21374.2	22724.6	7246.03	9591.28	5269.02	4943.95	8925.68	3305.28
889.826	2061.12	6.20539	8207.15	6267.21	18243.6	19791.3	6403.55	8094.88	4573.96	4246.19	7775.65	2779.45
890.326	1184.02	19.3184	4692.39	3477.66	10526	11161.7	3665.71	4519.4	2521.66	2283.2	4359.43	1587.77
593.219	301.297	82.373	1063.87	756.835	2196.98	2505.99	855.566	1017.24	547.425	578.964	1033.52	436.965
891.835	61.7961	1.52442	256.45	237.966	603.522	591.898	216.316	245.095	158.509	167.244	246.158	94.4836
279.688	31.1037	0.737427	64.0335	62.5283	65.7507	80.9364	52.7689	60.3894	48.9362	66.1834	32.9777	35.3094
916.784	187.71	1.35701	526.349	425.228	1023.09	1071.77	340.496	501.201	377.685	322.28	473.958	135.667
916.285	272.47	15.2493	614.669	634.202	1485.45	1507.78	483.141	656.727	515.267	380.475	732.35	267.405
915.781	150.277	0.558443	519.79	413.777	970.323	1052.34	409.5	474.795	364.088	260.381	510.793	171.15
573.907	47.1292	0	124.175	165.535	261.949	260.895	130.456	152.64	111.54	111.258	124.784	75.2771
566.925	173.032	4.50983	771.751	1044.17	1427.81	1550.23	1079.71	1094.54	665.942	664.94	801.545	479.522
583.57	46.4118	0	116.181	200.546	85.2201	123.076	144.003	200.096	146.41	115.75	107.129	76.6318
573.598	25.7002	2.66148	86.543	142.555	132.976	105.311	134.896	164.8	147.143	105.646	90.9653	61.4173
391.807	76.9763	2.3598	86.0571	306.186	456.092	843.694	84.1415	75.669	243.221	77.3734	66.9686	51.2826
489.255	248.125	179.1	283.923	842.339	1102.87	1844.3	254.065	292.011	650.259	292.2	278.483	183.486
391.61	82.5013	5.41289	81.3707	312.709	421.46	756.492	92.3602	81.056	247.462	109.331	80.416	50.1144
566.599	488.711	5.20473	1758.1	2860.45	2466.22	2760.09	2311.5	2774.42	1763.39	1751.36	1494.48	1051.66
489.508	185.977	0.814048	227.73	836.005	1057.14	1877.12	232.86	265.198	617.101	252.937	196.346	113.725
578.923	23.915	1.46369	67.3724	113.752	66.79	83.1643	85.6083	134.239	77.5534	73.3028	72.5445	50.5405
848.9	294.987	0.522025	1019.54	2029.76	1348.94	967.6	1416.48	1648.49	1257.53	962.668	840.111	730.679
565.933	962.848	5.40693	3420.11	5892.54	3678.36	3052.21	4777.67	5662.9	3979.24	3721.91	2935.62	2167.02
566.268	851.252	86.5169	2816.2	5278.44	3363.98	2689.21	4213.82	4928.98	3412.04	3216.74	2604.1	1965.3
848.398	343.363	7.1287	1191.29	2463.64	1482.11	1145.06	1752.28	1930.97	1455.95	1087.64	1005.43	870.695
583.9	45.6086	1.09666	149.35	249.142	132.384	132.914	166.793	219.389	160.781	170.091	155.275	96.7053
434.443	11.0549	1.12749	31.2119	63.3726	39.3482	37.5073	33.5056	61.8903	38.1986	35.6049	36.1299	18.41
584.227	81.206	47.0052	171.895	190.395	179.817	129.338	175.587	198.601	183.961	186.817	152.182	116.76
854.312	55.3397	14.8233	260.047	246.12	269.361	369.275	164.407	211.615	225.925	302.421	208.918	147.378
206.154	57.0213	69.5784	276.471	70.3945	111.662	59.8463	325.333	198.582	62.7767	92.9855	45.6397	172.644
648.936	47.6121	1.06899	62.4388	117.599	207.452	227.438	142.857	108.338	62.2997	72.9421	87.2026	32.0007
390.675	26.8414	2.6244	53.8928	38.9013	88.7961	95.9474	44.0925	77.5451	48.0039	41.9044	56.5073	46.8813
853.8	55.5489	2.88823	338.306	271.792	240.322	408.061	177.343	269.148	208.582	373.087	257.416	117.261
552.951	75.9506	10.0333	107.291	146.221	94.2586	127.971	273.067	164.277	90.596	210.739	183.942	135.74
397.555	105.308	8.4228	87.6147	134.45	312.447	445.967	65.4505	82.4253	122.425	82.72	109.465	43.8918
122.096	137.65	18.0847	434.377	164.706	126.821	262.584	255.857	326.204	177.321	335.575	84.9469	318.86
706.335	434.384	50.1534	394.074	1254.32	560.644	393.984	1315.92	635.816	511.235	294.345	339.867	337.899
267.042	71.7409	9.93261	32.7672	81.3914	36.4221	68.3872	73.3061	70.7512	78.5291	48.5978	75.2203	31.9238
444.268	300.585	110.802	384.77	399.087	393.676	409.177	579.866	437.685	316.392	429.832	471.471	356.982
442.265	4224.66	110.818	4331.96	5541.13	6062.35	5773.05	5950.44	6723.1	4627.83	6347.94	5707.43	4681.94
443.266	967.772	124.404	970.379	1282.65	1319.82	1283.37	1411.95	1514.28	1046.78	1437.75	1278.64	1066.84
420.735	273.535	5.80306	346.574	354.481	411.817	257.093	557.136	461.542	362.4	394.672	505.149	254.558
246.17	1134.72	401.101	2172.16	800.549	1358.16	2810.62	1405.16	4611.31	1672.94	6390.74	1563.33	4733.55
190.048	27.671	72.3779	113.719	87.0198	129.649	259.056	143.932	348.785	94.1855	125.275	134.202	98.1858
247.173	161.893	100.161	314.284	163.145	262.14	432.232	228.756	714.892	248.778	932.666	250.276	695.949
420.233	687.18	275.123	931.196	872.491	899.689	692.757	1405.09	1133.42	830.795	910.786	1167.82	655.51
365.154	500.91	4685.53	4387.27	2616.66	2128.68	2501.64	648.718	545.831	458.932	719.329	1337.66	426.475
350.189	1360.83	8965.33	10992.2	6466.05	6577.66	6849.16	1633.31	1235.21	943.273	1366.73	3493.1	1079.43
328.205	427.924	5862.29	7592.19	2887.43	2821.41	2945.49	535.882	430.317	293.38	481.2	1326.92	354.829
349.184	6410.64	56866.8	66092.5	38829.8	39391.9	40778.5	7898.8	6529.2	5150.56	7408.31	20056.4	4992.8
327.201	2162.44	36404.5	46719.8	17578.6	17138.1	17334.1	2956.59	2357.6	1660.81	2746.34	7844.48	1891.96
344.228	350.079	2002.7	3162.52	1751	1740.79	1553.63	400.304	395.077	311.042	441.144	961.998	316.648
351.189	249.983	1605.16	1996.71	1200.62	1265.32	1232.02	381.166	293.685	207.714	319.141	727.208	249.043
209.078	668.128	529.873	794.246	664.517	785.244	519.206	1205.08	1044.15	436.747	865.285	487.848	946.543
637.972	88.9762	0.812923	173.059	326.904	451.685	36.7301	171.711	130.888	106.5	55.9306	165.063	86.566
181.578	31.8646	0.748584	90.1071	180.051	84.6683	38.8742	64.8355	106.202	47.1696	24.5052	67.7826	23.0517
147.542	16.4084	0.544995	35.3576	29.4025	39.0027	50.1017	21.3826	38.8829	25.4058	16.4972	28.106	13.2906
128.07	153.424	329.751	303.644	283.591	340.614	417.202	268.5	327.039	223.164	161.828	195.561	109.728
196.06	448.897	608.665	504.476	643.085	796.103	1204.48	756.971	970.377	720.821	480.477	593.759	298.895
523.629	72.4986	6.64682	70.1225	53.5443	61.6427	44.5008	147.349	61.9702	63.2769	120.335	122.575	91.6945
363.165	424.13	489.146	609.769	1532.38	713.924	922.419	987.428	825.825	511.943	890.177	2800.18	556.163
495.137	82.828	41.9029	108.306	51.2376	87.603	116.062	109.244	183.585	98.9196	70.6462	365.237	88.5513
411.761	66.557	1.16102	65.4144	90.2654	94.2572	112.43	107.495	102.55	146.697	99.8307	89.8507	68.264
353.674	116.178	33.0256	129.156	511.657	116.865	107.325	547.051	175.01	150.218	55.6706	176.291	56.1185
408.223	463.7	156.113	539.149	786.994	1049.12	886.291	1015.47	783.82	694.842	430.363	665.696	305.731
408.725	178.601	4.15663	197.116	292.208	474.832	371.314	395.124	306.594	296.439	167.89	285.672	97.2514
369.553	32.2674	1.61645	33.8631	63.5237	68.2536	63.1027	55.1778	55.743	39.618	24.4796	39.1234	12.1814
256.028	42.125	8.18319	63.0054	70.1267	54.0529	59.4394	52.5328	67.5301	52.6452	68.1895	88.2282	49.5211
312.501	17.5611	0.662245	33.6348	38.8394	37.6099	48.5646	36.3174	32.3475	21.5136	15.9227	23.8568	14.3811
338.09	494.132	5780.38	5483.67	4080.73	233.963	220.292	397.778	554.047	1784.69	699.932	954.422	1278.77
477.751	168.972	9.98723	220.686	333.205	442.332	365.989	306.239	283.617	249.519	166.909	223.327	114.645
318.503	579.449	2.54505	831.459	1318.41	1622.09	1573.13	1283.39	1109.41	852.425	652.719	878.245	382.448
318.837	185.297	0.462931	263.709	409.319	530.104	455.783	377.491	345.307	267.539	199.937	265.254	120.629
433.582	62.8221	0.333519	36.6084	45.4927	259.245	272.486	45.9455	41.6588	43.5614	14.9265	55.742	12.5037
143.07	139.067	216.537	292.533	239.268	202.817	171.195	232.253	246.03	108.144	201.197	297.395	258.611
477.248	575.7	75.7929	871.73	1265.08	1441.7	1187.49	1122.92	980.457	821.829	512.798	744.463	399.081
317.516	13.1007	0.113448	20.6772	27.426	35.4639	36.8308	29.9308	21.5691	16.7589	16.3283	21.2409	7.72688
318.17	1390.8	327.216	2086.67	2955.71	3511.19	3565.81	2736.39	2823.7	1951.7	1505.07	2075.31	1054.15
476.748	891.448	0.339651	1338.88	1998.5	2447.48	2029.74	1771.76	1539.98	1384.64	833.106	1208.06	574.374
671.855	127.718	0	173.501	157.326	333.513	151.808	440.112	245.859	255.463	193.633	239.044	144.28
251.048	57.4418	128.101	31.2166	24.3994	25.89	22.1924	110.223	223.274	543.605	867.957	160.735	399.243
671.353	183.85	57.5057	248.717	184.746	486.031	271.053	685.341	402.111	383.367	276.603	373.319	210.034
649.844	89.464	1.24968	96.8635	98.6621	253.105	189.416	127.797	106.634	81.3862	88.0461	105.985	65.886
648.82	200.191	1.98922	243.632	212.441	240.809	174.442	369.261	224.903	203.675	279.725	299.063	208.65
202.048	345.526	203.055	261.873	145.578	236.233	564.659	369.376	511.781	174.611	444.523	678.009	372.824
179.52	12.2252	6.9155	9.05515	9.11833	9.07026	30.6197	26.5285	20.4045	6.69949	19.4003	21.0511	26.3941
105.034	194.315	125.965	164.97	96.2004	177.334	329.173	330.648	347.859	83.5378	277.981	349.557	302.808
180.066	1168.34	699.066	979.95	550.816	900.95	1857.47	1895.91	2057.86	448.261	1597.59	2159.75	2060.39
347.127	817.38	717.148	897.959	1397.28	1298.97	342.459	1116.56	804.053	398.097	563.692	989.716	508.27
782.789	253.16	687.085	346.828	447.826	444.933	476.992	444.566	401.192	270.422	269.676	373.593	250.513
783.29	189.381	329.728	176.466	236.242	249.309	254.176	213.793	270.711	146.909	158.893	195.93	143.134
771.801	2613.62	4935.42	3168.62	4497.31	4400.92	5361.68	4444.22	3968.78	3978.67	2462.15	4032.47	2707.03
811.776	9830.38	19736	12275	15387.8	15363.7	18345.8	15543	15117.9	9306.26	10951.9	13483.4	10082.3
830.248	1169.86	538.856	1465.2	1774.5	1459.47	1592.5	1368.24	1809.89	1106.42	1218.34	1700.39	1100.94
837.731	1081.76	1802.86	1290.84	1654.63	1361.01	1266.73	1363.17	1526.78	1152.8	1087.13	1588.12	964.731
839.235	678.455	426.89	894.346	1130.1	906.002	910.957	796.587	1016	782.088	755.56	1039.6	609.454
617.959	62.7057	16.2373	150.489	907.885	862.151	80.7314	475.694	306.614	8.53271	86.5187	228.667	46.9753
919.321	82.6337	189.782	262.776	177.385	149.107	224.435	768.739	341.734	96.2535	172.127	208.407	188.696
838.232	1605.21	1595.78	2066.25	2661.78	2045.17	2137.82	1781.88	2335.26	2078.17	1774.2	2390.02	1367.32
811.274	12922.5	26167.9	16246.2	20741.3	20621.7	23491.7	20061.3	19942.7	12284	12549.5	18038.4	13278.7
772.799	394.109	758.186	517.968	686.454	652.129	779.595	634.851	634.279	483.655	405.082	573.793	403.917
782.288	344.067	898.439	420.368	666.088	546.75	633.692	620.193	592.019	442.356	365.36	555.778	348.743
772.298	1294.17	2360.67	1408.97	2040.45	1933.57	2222.2	1797.74	1815.42	1508.65	1065.82	1688.29	1258.59
838.733	1072.92	926.534	1351.44	1766.45	1382.35	1415.26	1136.62	1580.63	1368.44	1234.33	1637.59	919.341
849.713	60.748	87.3509	106.255	98.9125	84.3963	99.3564	94.6607	118.112	77.3946	97.3119	145.732	82.9792
563.235	196.409	586.828	554.037	851.137	250.032	292.774	367.752	445.143	530.213	960.604	332.471	423
831.252	538.1	297.095	720.893	859.057	687.108	744.565	667.116	747.213	523.67	589.114	739.458	531.154
812.277	5146.57	10325	7960.85	8251.2	8503.84	9513.44	8636.1	8029.36	4859.68	5107.39	7077.77	5490.56
812.778	2167.63	4235.06	2571.88	3468.95	3443.74	3991.52	3286.42	3355.37	2025.67	2080.69	2975.03	2229.01
813.284	704.981	1427.91	880.088	1288.06	1147.36	1251.96	1166.84	1120.45	729.317	700.851	1100.89	761.684
830.752	891.975	447.995	1137.51	1445.63	1122.62	1255.89	1234.41	1395.88	903.781	1001.41	1306.4	855.203
808.753	155.853	334.332	182.747	254.927	267.334	296.074	273.769	272.299	165.82	177.76	244.974	183.076
809.253	127.705	271.37	176.641	235.21	215.063	252.965	254.402	239.314	176.648	170.848	206.492	145.124
833.782	595.234	865.472	737.29	940.073	752.669	937.693	815.538	870.283	124.577	583.099	924.316	427.144
773.299	137.507	306.396	189.782	248.06	241.061	205.773	240.126	225.047	189.729	142.461	206.992	156.711
841.751	108.969	151.994	148.929	160.925	182.533	176.502	162.787	195.704	133.035	149.792	177.125	90.6978
558.823	125.739	184.31	131.549	208.172	156.944	186.375	171.712	167.906	162.474	169.849	218.708	89.0007
473.79	48.1654	3.21269	85.1756	48.4863	32.6643	24.589	67.553	72.5347	51.3524	44.2619	47.4664	25.091
813.793	278.274	440.874	311.974	406.947	479.165	490.831	384.12	389.907	232.706	271.623	374.986	255.407
472.78	231.401	1.37447	409.709	249.196	181.824	124.874	457.263	368.541	244.224	195.514	346.659	107.443
841.25	150.807	203.044	232.948	252.727	238.791	275.907	203.621	203.511	161.229	162.206	255.083	131.144
833.292	876.763	1204.67	1114.59	1577.67	1254.13	1587.15	1373.58	1269.37	376.07	907.367	1446.33	709.269
775.755	200.452	1113.3	473.304	537.777	290.147	390.026	420.191	464.031	341.061	794.634	420.698	387.313
540.272	275.617	153.917	460.539	718.421	628.625	586.664	696.907	452.445	308.367	402.031	352.219	290.904
786.743	51.4586	381.507	140.938	145.884	123.423	196.498	165.79	138.521	83.192	225.787	78.9837	118.85
776.259	187.747	873.389	328.744	412.267	237.432	286.629	335.042	357.904	289.267	571.543	283.087	307.515
372.226	299.408	3306.24	3946.06	1602.9	1062.99	1099.83	766.511	528.439	218.699	493.842	1481.17	467.483
540.776	137.131	3.20377	238.565	360.472	347.422	316.137	400.902	216.607	153.656	200.687	165.429	117.539
771.32	6791.21	6684.32	6901.51	11479.1	10264	12371.9	9767.42	8434.78	7334.24	5521.17	8404.98	5307.82
339.868	36.7064	0.522486	94.5634	195.032	30.7347	9.60687	212.887	132.669	61.609	77.2405	118.968	48.6355
388.252	177.268	1777.6	2777.77	1078.89	515.856	486.096	504.05	402.269	180.276	395.59	1137.34	418.202
394.211	610.466	5668.91	6444.88	2887.18	1641.39	1503.95	1269.45	1068.13	468.961	849.811	2706.86	822.669
371.228	1216.47	18815.8	20605.7	8438.22	5554.28	5620.55	3468.47	2515.76	1045.17	2626.38	8048.21	2242.56
823.809	979.909	1239.62	1015.29	1447.34	1655.33	1794.24	1528.88	1227.11	837.246	777.538	1218.59	749.928
902.901	691.156	40.9877	618.495	624.939	922.337	876.688	971.62	608.403	435.802	307.584	550.047	379.427
823.322	2933.38	3056.32	3041.21	4373.65	5063.64	5922	4169.46	3588.79	2595.8	2032.16	3590.13	2095.94
984.375	252.948	202.257	377.047	300.896	320.609	183.995	315.883	267.791	149.219	149.208	254.86	211.525
509.792	39.3002	2.85396	73.6124	112.468	22.8493	3.10035	162.197	97.3545	53.4235	63.8252	76.6588	25.8488
824.294	386.229	491.457	530.116	640.208	631.541	759.765	594.462	563.604	372.02	329.885	563.54	325.778
901.897	1490.31	28.6417	1290.56	1327.03	1918.48	2065.4	2270.65	1240.97	854.032	615.479	1003.87	873.93
902.399	1441.16	49.2221	1243.3	1249.64	1766.73	1756.25	1907.91	1140.43	777.757	553.01	984.579	771.688
475.897	54.9281	5.55314	68.3896	160.749	76.0779	83.3517	126.64	102.437	120.708	125.97	69.0343	56.8122
393.21	2009.29	31092.6	33652	14880.1	7358.99	7660.4	5516.82	4455.82	1922.8	3944.63	14098.3	3628.14
834.302	490.705	512.511	560.4	820.605	637.51	786.872	623.641	649.272	524.698	486.67	783.175	395.436
839.788	527.72	184.922	736.633	752.242	756.736	877.419	738.052	720.838	674.938	595.503	900.44	466.612
713.835	463.061	2.84975	775.215	1376.44	692.368	690.505	1132.09	923.467	1032.73	1019.51	604.563	683.751
712.833	1416.66	0.938945	2437.91	4222.15	2200.69	2179.74	3561.22	2796.81	3195.83	2994.93	1940.97	1995.98
713.334	1133.04	61.4114	1840.66	3163.08	1590.01	1565.02	2598.48	2036.71	2370.4	2335.94	1513.84	1512.91
440.725	95.3698	3.30995	148.035	136.12	130.392	237.243	166.482	154.982	103.778	74.5281	123.681	65.7642
714.333	214.55	59.4619	310.147	442.282	274.433	225.651	437.612	393.816	365.844	388.971	250.399	229.972
840.294	437.792	106.258	594.519	466.089	372.846	478.608	398.712	557.238	498.828	437.443	638.524	349.95
292.186	347.735	83.906	1061.7	435.091	544.562	341.64	1286.49	749.417	209.325	403.641	276.757	750.916
819.814	585.389	311.201	601.081	817.598	1037.6	1138.78	707.381	662.541	507.571	374.135	708.784	353.179
609.345	954.512	79.1224	1233.1	1536.06	1366.15	885.552	2756.95	1435.7	1187.22	991.139	1459.9	937.979
609.851	588.936	0	762.914	965.383	846.064	597.274	1928.12	911.633	835.923	653.798	944.104	695.505
822.845	8797.38	5583.33	8507.21	12692.7	15186.6	16673.8	12160.1	9292.81	7872.23	5324.08	10178.2	5855.82
662.811	692.786	2.57364	989.283	1703.19	1072.64	1298.6	925.935	795.32	886.931	937.856	825.676	612.97
610.347	268.183	46.6504	363.934	447.038	389.968	177.983	754.502	457.173	365.534	324.511	442.112	301.354
662.308	1088.71	99.7013	1502.14	2621.27	1651.22	1878.78	1384.06	1294.73	1355.46	1343.16	1249.6	996.968
955.371	300.286	248.039	443.834	321.002	263.935	224.317	400.772	327.458	210.152	246.887	260.709	322.232
406.573	19.1338	0.922142	36.3813	50.4741	34.8336	40.1226	103.875	45.2267	34.9662	50.4295	49.5698	48.5352
400.747	141.456	4.25185	130.673	274.198	311.413	198.7	349.406	241.472	182.389	120.078	161.885	117.99
663.311	357.916	101.448	493.602	786.033	502.071	592.838	464.396	437.504	410.35	414.505	426.641	348.021
985.394	263.33	174.493	311.325	358.463	360.989	242.592	321.78	247.303	184.619	119.073	247.733	245.582
663.823	116.856	2.56217	146.74	273.242	167.91	221.815	154.221	133.379	156.294	149.793	154.545	98.7433
822.365	27194.2	7149.41	24093.5	36467.3	47989.7	52422.1	35325.6	24342.8	23163.4	14654.3	28173.3	15573.3
549.251	356.866	537.8	316.137	530.522	735.807	639.712	529.014	343.494	277.991	200.23	391.903	235.111
830.041	197.966	16.2726	142.89	177.23	211.936	243.658	179.825	96.999	178.665	65.3438	184.853	115.358
952.901	235.276	71.6849	353.245	292.36	262.343	212.198	348.903	266.349	232.227	212.366	260.231	228.738
961.377	193.358	148.323	279.826	224.581	231.763	119.89	318.755	246.901	166.108	224.549	243.509	206.449
987.742	119.232	91.5953	235.224	502.941	266.701	380.977	172.057	176.403	275.399	263.671	228.962	251.342
548.92	974.622	31.1323	795.002	1433.23	2106.9	2327.64	1377.71	851.694	886.06	551.621	1014.58	518.291
546.552	226.1	1.27566	142.018	247.432	375.228	463.234	265.058	222.437	152.856	117.509	241.187	111.018
942.929	615.121	86.7758	735.547	859.888	875.715	491.557	746.017	456.136	478.913	306.42	391.291	539.493
819.318	975.873	59.5251	847.992	1293.6	1639.46	2039.08	1249.22	896.822	793.489	508.519	1003.54	538.813
545.885	403.88	3.30858	348.859	619.032	827.769	981.218	583.638	422.689	377.197	260.187	459.869	223.372
547.583	22457.2	3.7587	17816.8	32033.1	46493.2	52120.1	29519.7	19906.7	20002.9	11440.2	23319.7	11285.9
547.917	18947.4	0.215409	15059.7	27868.2	39174.2	42747.1	25701.3	16795.9	16954.5	9817.71	19664.1	9478.18
548.251	9409.93	103.867	7687.38	13167.6	19203.5	20693.2	12463.1	8310.75	8338.52	4724.54	10220.9	4561.16
548.586	3121	2.05537	2556.73	4631.01	6748.16	7421.18	4491.19	2875.34	2896.17	1652.2	3322.13	1625.82
943.919	524.215	61.6179	582.541	508.07	562.584	371.983	603.636	475.178	353.276	336.7	356.516	388.645
820.872	178191	113.086	145531	234480	343582	384499	230216	147662	153812	81631	174851	92189.6
821.374	142979	80.5681	118539	189733	264366	328023	194811	120417	125493	67834.1	142383	76396.3
821.874	69451.1	32.8865	57271	92296.9	123950	155411	99786.4	59101.5	59938.4	32947.9	69095.9	36544.4
818.317	2280.68	55.8342	1965.13	3018.67	4312.06	4586.48	3000.56	1896.43	1834.57	1094.11	2183.99	1177.5
818.818	1911.87	30.4759	1495.85	2376.45	3588.29	3797.32	2351.06	1651.74	1646.55	845.948	1771.56	933.178
541.571	176.098	35.4756	153.434	242.37	314.603	444.583	300.764	199.931	142.261	122.417	175.542	90.7765
927.376	776.176	96.9276	507.415	476.085	509.829	349.078	1482.52	857.511	1038.43	1115.82	1096.23	896.677
942.411	236.246	133.19	367.306	437.946	268.969	242.539	372.307	251.036	212.629	148.333	376.699	222.75
939.366	288.238	138.656	270.504	287.077	273.905	250.03	557.259	369.141	428.147	430.087	462.191	358.633
831.856	2531.55	131.645	2269.11	3529.8	3845.93	4833.36	3305.83	2510.22	2143.71	1690.34	3001.66	1356.82
927.882	746.059	48.115	797.675	1069.7	1431.36	1118.64	1536.07	1235.14	1117.73	1083.65	1114.19	910.896
928.394	495.987	50.2879	665.738	969.531	1344.57	1007.49	1073.57	863.843	787.172	651.323	825.062	658.477
820.691	388.445	48.7603	327.408	496.802	618.111	830.846	498.971	365.474	322.835	230.803	405.77	255.334
992.396	206.092	117.961	254.509	265.371	237.265	184.621	239.093	228.034	153.974	147.952	220.403	221.299
546.22	423.559	94.7765	339.866	607.593	747.025	832.998	579.729	416.558	341.07	248.111	427.687	232.934
834.598	326.799	5.54722	232.666	379.18	344.461	422.31	271.589	300.317	325.622	216.758	412.952	116.505
961.887	175.904	86.3976	245.7	274.369	245.305	165.819	283.786	226.583	151.673	151.558	228.114	174.172
957.43	485.024	131.669	864.545	633.504	791.704	356.749	1043.44	535.4	330.313	284.957	381.959	683.738
949.414	323.094	77.8852	473.35	408.846	433.359	204.858	606.077	301.326	270.384	244.264	324.001	365.228
938.369	421.666	78.8545	306.737	281.731	233.8	304.934	888.779	549.285	610.287	666.505	693.831	552.457
420.421	396.879	15.0975	442.225	604.328	584.631	653.521	461.604	461.232	321.106	292.45	528.082	207.141
848.813	407.605	148.057	489.068	604.399	537.455	610.034	523.462	484.342	564.869	430.45	551.616	252.028
554.91	1852.68	0.86406	1490.57	2773.15	3193.68	4080.54	2622.61	1917.59	1789.43	1338.91	2331.01	965.484
555.245	1760.78	298.959	1574.89	2463.48	2863.29	3457.97	2453.26	1966.26	1562.25	1251.05	2108.63	1118.43
555.577	903.977	0.52961	767.7	1262.11	1478.39	1796.15	1171.35	1030.65	770.022	693.725	1094.05	481.676
555.91	374.101	1.70809	344.621	509.61	670.598	744.978	466.848	435.848	350.918	308.02	530.253	235.923
832.362	1956.59	100.687	1916.51	2942.39	3206.17	4079.43	2689.38	2051.14	1806.21	1290.65	2399.01	1096.87
762.827	148.495	91.7246	133.7	232.263	372.119	340.31	279.624	164.8	135.379	118.532	171.136	116.969
938.872	399.501	40.8511	332.191	281.272	226.071	277.802	838.725	515.751	542.818	652.369	635.89	391.673
424.419	434.566	0.231457	407.36	725.939	638.662	799.619	517.42	462.608	493.096	392.235	585.362	263.006
762.321	225.603	154.469	259.783	316.636	390.631	456.655	343.922	235.59	183.234	184.081	263.926	176.85
988.448	398.462	43.548	495.096	533.716	510.273	444.265	692.529	363.209	361.55	230.105	307.615	322.595
951.924	396.05	54.4331	574.747	380.13	411.386	379.482	672.708	500.585	252.86	280.53	380.923	390.698
830.869	284.292	5.83292	288.593	347.991	339.417	435.529	289.119	273.294	159.566	179.976	305.613	149.424
425.421	80.4248	0.184281	63.1785	120.583	122.432	119.69	92.8104	103.559	111.829	94.5853	94.3712	26.2353
832.862	1067.82	44.2612	948.017	1547.57	1722.59	2005.79	1448.73	1209.38	984.849	618.211	1371.99	619.466
987.947	304.415	19.0862	552.886	397.04	511.192	446.639	711.747	429.048	297.093	260.624	368.267	383.813
956.93	606.744	50.3108	949.363	629.573	720.609	522.547	949.85	570.712	291.911	290.536	327.749	667.185
989.442	208.136	43.9637	271.915	325.589	338.809	272.154	322.657	248.621	189.849	147.897	216.992	146.435
976.905	232.94	106.815	370.498	271.264	279.209	195.487	351.505	218.94	162.543	240.084	230.103	331.849
923.385	160.563	101.958	342.018	188.22	195.418	214.877	313.625	262.559	128.948	139.918	189.709	169.724
981.948	232.638	40.1355	336.041	360.009	326.247	387.589	305.033	220.011	108.285	142.197	259.296	190.021
620.75	133.772	753.974	329.734	493.761	297.56	388.987	112.565	201.347	396.203	482.056	200.573	238.964
989.885	175.823	85.7738	227.36	236.436	224.956	162.251	303.307	246.783	170.944	172.125	190.751	177.237
424.921	206.649	6.07906	212.724	382.178	319.683	393.31	258.433	247.284	300.748	166.944	309.416	136.869
424.67	308.774	1.21787	280.651	487.106	480.073	536.247	338.476	347.761	352.153	279.195	471.848	184.653
959.414	264.647	113.474	440.439	271.554	384.894	294.003	774.823	444.169	220.921	224.093	266.41	349.254
980.948	393.84	46.1167	712.792	462.466	722.651	563.173	564.164	403.181	210.786	182.678	376.545	383.679
949.926	403.653	86.372	672.03	631.902	540.147	376.168	710.421	417.506	234.094	264.142	316.079	446.726
992.948	274.204	34.844	480.772	329.532	493.5	310.46	586.815	285.721	157.033	159.36	237.297	353.306
993.95	361.677	22.5899	716.331	507.31	515.918	293.199	681.102	375.385	207.965	259.078	227.721	403.436
965.946	408.73	24.865	839.007	490.422	624.824	448.761	820.965	516.469	310.644	220.613	309.906	528.076
994.452	273.322	36.559	567.482	396.273	492.627	324.184	620.076	317.125	163.403	158.323	217.945	281.582
986.963	203.6	2.40722	306.249	411.784	461.895	200.712	467.141	338.253	89.2045	101.389	161.091	242.996
556.233	219.529	79.2362	261.324	217.385	219.953	221.405	372.009	221.295	189.877	173.145	281.452	167.745
562.572	288.408	0	268.13	392.792	402.117	556.945	325.237	335.157	326.344	299.071	468.275	194.551
565.221	1313.24	129.555	1373.78	2064.39	1622.11	1875.95	1587.33	1333.82	1361.38	1232.16	1957.04	835.686
561.563	152.807	9.68415	146.26	182.884	162.353	141.634	107.626	105.597	113.558	129.107	178.636	71.9594
941.904	239.812	105.854	314.308	495.266	365.311	244.954	349.825	254.486	205.474	159.514	390.449	239.616
944.904	286.378	111.567	345.54	314.323	383.135	337.473	465.926	319.935	240.831	296.665	271.245	304.91
971.437	269.469	46.0831	397.821	422.273	467.141	285.051	532.408	308.24	169.126	158.662	281.951	265.981
991.398	181.164	97.6685	269.349	198.435	149.67	164.401	237.144	193.728	119.209	154.916	186.521	170.113
846.836	105.955	9.28599	152.731	168.086	150.008	154.438	125.396	126.46	137.039	114.723	174.451	103.811
994.952	315.595	31.3261	491.909	397.415	434.734	324.543	654.873	361.362	239.603	197.945	257.841	262.214
334.141	870.561	1461.66	1287.98	903.734	1458.48	1901.3	2071.2	1863.66	1683.73	1651.29	1455.45	1538.22
964.94	685.404	20.0877	1292.29	702.975	909.102	736.522	1279.27	855.075	346.139	322.815	559.117	767.403
335.142	247.675	359.61	341.786	289.089	432.693	446.993	510.231	522.409	411.503	407.792	486.738	386.231
998.938	182.101	33.5723	175.064	234.094	193.686	135.775	282.955	158.083	91.9203	113.079	165.495	148.798
638.961	113.409	0	150.852	113.954	144.811	104.474	217.477	113.299	102.208	95.38	97.5029	123.572
887.866	113.278	33.1546	107.61	97.7703	122.165	120.758	195.778	128.946	190.4	189.719	156.722	124.508
565.555	1667.75	0.212473	1778.98	2661.49	2266.33	2699.56	1877.79	2021.45	1974.04	1852.14	2658.79	1065.43
979.947	494.269	24.8828	815.496	420.604	647.819	416.235	815.495	512.75	264.385	258.75	288.735	551.501
566.224	823.219	87.1987	767.784	1082.39	1027.92	1112.85	843.245	945.896	804.51	817.871	1052.66	517.117
957.939	752.041	53.1769	1536.82	638.306	1075.62	669.024	1569.86	765.658	435.084	412.557	545.964	870.1
958.432	530.358	131.811	1023.77	631.305	917.173	540.122	1200.58	736.034	406.463	426.179	427.728	694.952
618.939	196.759	0.797524	305.515	536.97	691.904	508.896	464.814	419.055	390.914	322.063	346.719	215.634
972.945	441.733	15.9338	706.256	583.77	616.852	410.461	735.108	379.93	300.515	240.964	350.299	499.915
979.445	303.444	23.8302	513.13	379.319	438.526	325.991	510.881	356.674	152.929	176.666	270.33	364.67
974.443	264.583	25.2189	283.975	245.318	294.962	243.13	373.973	259.689	169.388	164.209	179.5	252.965
978.944	382.641	41.1362	578.057	580.647	474.118	330.451	652.182	453.94	255.504	181.916	306.756	399.393
952.438	358.994	29.8325	370.881	316.457	370.193	364.086	511.517	336.247	298.139	294.588	369.698	321.048
843.852	154.08	24.8274	155.586	241.437	213.756	236.208	258.657	280.576	139.187	175.93	252.71	152.874
560.566	863.561	0.91117	1036.27	1401.07	1227.93	1403.14	1061.18	1089.33	815.652	928.463	1374.36	654.745
958.935	487.635	93.7864	716.205	431.814	559.94	408.95	1013.52	570.079	318.229	307.743	420.309	645.19
638.624	160.609	3.96971	276.058	148.895	230.705	142.48	282.113	129.743	68.9722	98.5639	102.344	167.787
564.557	121.581	2.25332	101.859	165.186	132.502	181.381	153.199	142.622	145.121	128.964	183.613	64.1583
963.935	605.873	85.5995	1423.25	518.279	1001.64	673.381	1423.52	698.068	321.004	323.749	495.249	721.564
560.9	438.665	1.20976	518.245	659.013	622.008	681.51	512.961	578.737	465.902	486.057	719.699	325.263
562.236	433.873	86.1648	448.695	560.358	571.773	626.082	479.653	578.324	422.763	484.304	636.472	346.411
966.94	442.092	5.02289	403.211	255.978	351.012	314.62	536.775	335.085	150.097	201.312	249.513	272
973.946	312.06	10.2372	491.298	298.834	424.464	300.964	497.158	343.827	194.276	158.092	217.712	306.109
973.447	437.459	29.546	486.324	383.409	480.2	332.481	439.533	330.969	247.929	229.813	239.141	369.021
848.33	761.914	73.06	793.487	1027.87	915.291	980.69	741.119	770.578	762.408	725.561	1086.52	484.223
928.915	927.967	72.1779	2102.71	1044.62	1538.07	1017.21	2095.14	1199.74	705.156	752.382	815.317	1520.85
619.949	191.351	0.912196	398.477	281.806	293.296	253.28	425.816	239.05	138.605	167.6	182.686	267.708
847.829	1147.04	36.5845	1219.74	1556.77	1490.01	1462.26	1452.09	1296.05	1276.83	1092.85	1722.59	771.24
847.328	1008.07	52.0946	1006.75	1429.95	1219.74	1333.18	1195.22	1170.76	1025.97	967.197	1557.44	754.778
619.614	254.719	3.59675	531.45	432.612	464.891	404.489	522.582	428.061	241.393	230.251	279.745	345.784
842.857	311.582	15.7281	380.338	463.369	487.234	458.872	326.439	378.962	253.579	307.76	452.24	218.777
964.442	617.756	45.1225	1299.23	640.258	895.642	590.856	1540.27	755.21	353.756	315.788	451.941	705.089
929.421	914.047	70.0997	1986.9	834.688	1094.46	708.326	1755.17	1041.69	557.491	561.506	590.89	1366.61
564.888	138.235	3.09161	161.913	237.993	188.251	215.361	163.552	162.551	143.706	146.873	217.712	84.6844
560.232	1124.57	87.1024	1298.24	1620.32	1575.11	1585.27	1369.07	1502.14	1080.16	1245.91	1727.22	914.956
999.941	211.814	46.6047	236.694	256.666	262.652	264.94	308.289	243.508	143.784	115.241	194.658	207.97
562.902	167.831	0.483453	178.145	247.538	236.666	259.441	199.354	194.08	152.271	220.182	209.578	126.473
647.602	97.9697	0	132.937	130.579	62.7528	120.21	93.7558	92.3315	81.4758	95.5846	126.172	94.8903
981.461	454.161	57.1003	553.851	507.734	709.683	629.04	470.125	410.428	259.961	277.498	473.247	334.958
578.271	320.038	103.585	373.036	648.105	529.536	402.828	903.593	568.708	450.406	310.627	453.7	257.838
561.23	233.749	78.5633	329.537	355.961	390.698	325.485	307.409	310.49	221.464	215.083	359.495	224.588
632.94	118.683	0.922112	153.568	161.007	134.359	73.8175	146.011	111.308	68.7055	148.356	76.1841	111.395
843.354	280.044	40.2831	321.854	405.98	365.386	368.392	325.387	442.518	249.76	292.548	374.866	252.685
811.872	255.973	52.5938	424.306	695.853	1045.53	1442.3	923.609	564.712	168.794	249.781	383.403	138.977
637.592	98.7495	1.9765	217.458	134.727	140.084	132.727	156.874	154.867	107.285	146.281	155.016	151.382
577.769	254.116	0	350.168	607.29	525.686	352.92	899	764.2	500.128	398.703	428.076	221.621
921.919	265.078	23.7838	725.612	305.239	382.987	241.472	913.849	305.938	209.157	255.052	218.476	350.151
647.939	62.0061	1.42845	84.574	83.0516	113.009	75.1898	140.355	78.5641	69.1967	88.6095	74.1695	76.966
632.601	116.589	18.9777	184.003	143.913	82.3679	117.296	170.459	108.8	60.9005	133.978	125.035	106.482
922.417	228.388	76.9952	636.335	263.983	301.626	196.442	701.134	269.762	142.637	196.651	227.81	326.275
561.866	105.576	2.91538	96.2981	113.095	143.016	149.28	129.716	135.064	83.5884	79.2085	150.303	83.1576
884.37	113.532	39.3145	151.225	138.711	148.723	136.645	192.16	148.449	93.4343	147.371	155.098	116.532
578.78	118.653	8.90085	99.9861	178.256	161.137	189.6	224.208	211.145	138.251	95.0861	160.467	106.164
921.42	335.427	69.2235	568.48	433.585	425.152	289.228	486.717	315.465	213.576	209.047	232.103	238.454
656.916	90.174	0.329005	182.777	102.936	124.692	117.451	180.883	174.274	92.5004	121.714	140.091	108.133
913.376	228.137	121.621	338.305	414.744	582.468	370.024	440.134	323.008	163.951	171.451	329.008	224.946
651.607	86.3757	6.61973	157.807	100.017	159.45	122.078	124.503	114.268	58.2829	104.382	119.605	152.151
914.395	156.35	99.5271	276.034	215.577	289.043	160.98	329.075	218.222	127.582	155.795	279.4	175.883
374.9	110.966	16.4681	89.1677	125.107	137.496	160.436	121.263	105.749	75.245	69.0238	145.729	51.339
404.738	364.047	2.48457	555.293	487.841	470.957	365.025	778.111	624.044	630.501	275.56	511.531	173.367
405.735	63.8178	3.78227	97.4284	76.7776	94.5918	38.7584	110.648	86.9967	101.727	52.1509	59.1223	24.6497
183.101	882.129	1628.79	2110.85	1431.53	1475.79	711.887	1272.34	1160.19	672.744	1210.89	547.258	1499.12
576.176	148.279	123.042	201.543	124.691	355.16	537.511	565.127	489.562	101.485	226.963	170.563	201.142
514.875	72.4813	10.9655	104.949	164.905	176.59	242.325	174.088	112.374	128.626	66.2079	135.497	54.5006
802.27	148.103	300.68	224.402	336.271	519.819	637.218	388.316	364.654	125.997	241.456	231.872	111.571
375.575	28.1285	2.81983	36.8433	29.9274	65.3123	47.7924	44.3046	40.421	16.8101	32.4977	47.9364	23.6682
914.902	133.708	29.8857	160.377	157.52	198.894	150.451	184.132	159.272	90.1307	80.5412	159.242	127.324
892.38	148.191	59.0945	203.951	255.42	199.7	161.999	275.231	216.937	166.621	133.523	185.325	136.862
908.413	116.476	13.4467	123.472	141.899	131.282	106.953	157.364	143.086	112.196	85.306	132.28	96.5829
378.159	393.415	1321.06	450.601	357.409	404.689	364.943	580.502	507.623	346.456	424.701	401.671	278.194
377.148	1042.74	5680.6	1433.63	1304.2	1282.71	1077.52	1880.52	1650.35	1287.51	1361.25	1554.52	639.378
797.803	158.555	25.8138	133.606	252.842	164.254	254.225	151.73	137.854	235.456	125.781	195.325	66.9051
532.536	86.3314	16.3226	46.8917	184.163	140.727	185.414	79.2272	97.6742	165.068	126.192	132.072	42.7261
907.408	157.812	18.1038	245.603	223.848	218.98	147.118	228.623	165.076	111.583	90.9485	106.586	108.897
280.153	330.633	186.809	1081.55	336.328	785.52	798.135	1923.6	649.789	1597.9	1898.56	860.715	3154.34
772.356	261.284	19.9906	254.158	647.512	410.365	579.347	372.745	338.89	5.76338	254.653	369.881	218.422
767.955	142.95	0	130.869	230.377	168.693	237.129	185.028	146.864	136.736	73.2168	158.776	97.1999
906.916	124.981	1.99647	153.325	172.477	209.154	114.912	171.577	89.6114	67.8588	91.0881	151.221	123.198
770.347	9370.14	47.2872	7503.03	16702.8	12977.9	16025.7	12269.2	9771.72	11004.7	6180.48	10267.2	5693.82
513.9	582.687	3.34896	471.306	1101.06	901.989	1128.67	830.971	633.816	705.004	440.053	693.95	372.378
531.874	235.298	0.292334	130.836	469.602	283.18	386.686	183.202	255.185	385.608	256.677	338.732	107.31
770.849	7281.94	10.1228	5942.52	13089.9	10176.2	12913.4	10039.9	7733.14	8441.24	4932.33	8077.29	4575.05
526.549	188.575	7.10468	143.09	322.005	189.842	296.897	165.919	199.488	235.924	148.619	258.685	95.5171
531.538	160.683	2.04581	103.169	307.767	182.407	267.169	179.818	176.369	236.235	145.972	259.103	66.6079
781.842	193.225	6.18798	148.795	350.136	284.498	414.434	244.084	180.553	246.563	118.996	225.663	111.201
781.337	279.747	65.0079	243.169	527.437	379.552	578.978	380.389	292.889	331.464	202.696	371.466	164.395
514.574	225.869	3.9015	197.92	431.06	336.508	445.554	314.986	254.196	293.501	178.293	259.837	130.558
526.883	138.669	2.48152	118.352	252.747	158.649	266.382	149.492	168.933	165.438	143.823	208.271	82.485
796.798	214.732	12.4159	157.407	410.085	281.675	312.921	235.768	195.446	309.017	183.787	305.066	125.631
789.313	150.119	63.3484	116.806	223.993	161.184	184.857	140.931	114.52	118.103	83.8663	136.024	88.8325
316.025	75.4355	96.9226	123.946	84.357	88.3743	41.0608	93.0293	92.3205	66.7934	102.984	108.433	109.482
797.31	281.042	42.9256	245.306	466.12	295.441	426.344	341.806	293.731	340.296	185.404	393.182	156.884
514.236	627.027	292.054	610.285	1086.32	960.617	1038.05	797.293	724.471	708.414	484.629	712.109	435.332
766.376	187.846	49.1039	210.34	282.654	378.304	480.446	305.158	228.186	334.869	146.337	202.985	153.545
383.692	43.9091	4.16602	31.9025	86.5689	109.732	159.629	56.1983	75.8068	88.1647	46.4454	60.7804	41.3009
240.09	225.691	569.719	532.455	293.974	351.139	424.594	396.414	404.363	295.761	387.1	335.475	308.186
856.891	253.379	11.9221	161.32	257.908	498.687	374.762	252.287	146.452	186.317	105.842	253.444	77.2926
419.727	267.256	6.75634	270.005	938.494	1341.92	1027.7	618.574	289.468	502.511	167.705	308.805	127.941
878.396	570.192	50.1711	422.483	603.311	1048.82	173.865	514.391	260.142	272.547	160.847	441.988	285.844
517.912	107.07	1.43137	34.2501	855.247	640.377	174.947	897.452	374.153	242.263	32.4282	32.1781	21.5418
518.581	53.4419	3.50963	20.6936	385.746	302.443	87.4174	463.871	185.546	118.122	15.1419	20.4964	18.3078
878.903	345.546	3.78368	253.593	385.778	629.898	127.159	331.14	192.169	179.866	94.2941	271.585	214.548
856.391	391.536	45.7831	180.111	345.747	666.272	532.131	372.86	190.102	214.596	94.1461	357.458	111.38
518.241	183.58	107.835	157.483	841.309	654.294	217.273	991.582	456.907	303.034	132.484	137.594	105.157
476.761	177.376	1.0896	226.569	219.313	201.843	144.786	276.167	201.301	172.969	280.864	292.114	175.127
598.306	746.039	1107.84	1154.55	1592.47	740.965	635.55	1362.68	1219.35	771.762	811.037	1129.73	767.48
267.121	1307.01	1766.77	2109.2	1580.51	1820.52	1160.33	1887.86	1755.03	971.111	1623.7	1023.85	1561.38
281.135	1569.19	1875.07	2426.32	2139.11	2345.78	1591.03	2571.77	2237.08	1722.1	2227.37	1335.66	2163.88
282.135	282.482	340.648	440.315	403.776	429.897	273.251	460.841	414.396	294.043	350.281	278.882	311.409
484.779	213.783	8.85613	115.683	159.849	614.118	628.69	115.197	131.963	223.344	40.6815	200.139	60.1104
452.208	428.83	1168.7	500.285	753.09	935.297	234.97	1058.64	635.726	262.344	229.346	821.21	344.053
111.111	258.989	321.094	356.928	328.075	365.411	327.901	297.127	368.047	249.098	358.897	325.908	260.414
435.89	16.7151	114.223	114.139	102.878	63.0878	60.1385	58.0632	38.1175	20.8209	35.02	154.818	33.6612
327.842	60.5483	3.00762	80.7702	59.2565	112.533	85.2778	79.1791	92.6977	50.6993	65.2587	117.916	49.419
433.282	64.3989	236.089	323.34	246.461	194.969	156.044	177.65	149.125	66.7812	96.6459	335.073	116.511
432.279	214.342	888.323	1398.81	1155.78	729.114	752.893	520.71	467.127	295.475	419.485	1585.98	469.578
491.262	2476.26	130.556	2496.23	2320.77	4483.96	3176.01	2740.1	3170.59	2138.93	2540.76	4128.16	2132.75
438.239	536.681	3789.84	3175.14	2839.71	1776.19	1896.55	1543.1	1172.19	644.191	919.182	3623.44	972.058
491.764	1332.08	11.5535	1288.32	1254.69	2510.21	1743.4	1422.87	1726.07	1119.1	1369.12	2312.6	1094.02
415.254	1002.24	6781.13	7787.6	6494.69	3677.2	3962.35	3019.42	2326.58	1263.12	1980.46	8495.55	2000.72
437.237	2116.07	13263.1	14548.8	13110.5	7859.88	8642.01	6027.66	4762.33	2676.34	3866.2	16999.1	4129.53
112.115	24.4228	33.6913	31.4699	32.3135	32.6026	30.2715	38.1295	36.8779	25.9249	35.3573	33.2661	21.6897
659.33	318.165	204.376	302.931	250.511	420.396	278.784	474.863	255.57	334.37	482.121	440.147	422.085
460.777	58.7639	10.1672	63.502	68.0424	79.8189	83.7452	123.878	79.6398	101.184	52.7409	120.017	32.9114
466.773	252.592	5.25879	191.672	199.993	226.106	194.033	340.322	214.843	253.377	179.083	404.504	115.549
877.904	459.542	0.20751	221.896	472.66	1026.91	92.5805	285.698	148.978	188.882	55.0426	370.429	103.57
184.543	25.201	5.74311	47.0264	19.6437	25.4299	17.411	20.9793	41.4272	16.0447	34.9851	19.6436	41.4678
451.214	292.957	406.785	535.532	1237.2	496.702	610.082	672.023	562.209	359.97	544.828	2101.78	427.371
416.253	860.487	1458.77	2078.7	1878.44	1522.67	1944.36	1184.69	907.745	1140.53	1685.51	2618.71	1088.49
579.889	99.6863	4.06747	138.224	121.356	114.617	113.921	186.371	119.649	154.973	282.747	215.298	135.61
417.258	186.673	293.634	417.69	393.705	353.798	429.175	253.222	188.839	242.922	371.421	570.092	220.927
309.132	1123.81	2152.32	2586.41	1291.92	1898.19	1157.35	2645.41	1898.52	689.362	1248.4	860.005	2024.64
539.244	522.513	527.139	1175.4	667.212	621.192	270.164	1141.63	742.1	305.647	432.032	394.558	1003.95
580.705	59.139	8.10604	86.7074	61.786	60.3379	58.9634	95.6774	65.4659	61.5978	127.135	105.219	72.2405
724.872	170.711	2.30686	261.389	170.656	168.655	159.222	308.625	205.231	267.312	514.043	369.009	238.27
567.245	1220.9	2085.94	3754.45	894.731	1762.98	811.168	3411.12	2082.87	500.822	1092.53	529.212	2610
525.232	656.545	970.725	1462.16	460.378	860.374	360.604	1440.74	944.19	291.287	558.419	366.982	1363.73
581.259	503.505	908.416	1547.22	463.461	812.045	353.945	1475.54	866.177	225.226	457.423	260.895	1099.29
274.136	201.16	292.134	495.34	199.804	281.132	157.562	742.932	319.427	96.639	176.854	196.091	373.505
176.559	21.8561	0.930702	51.6134	43.9039	38.5657	23.7428	39.1285	34.5345	12.507	29.5276	19.759	38.612
290.163	553.433	580.085	794.306	534.488	806.634	426.085	1316.16	585.925	329.919	384.656	435.712	1029.2
568.243	403.773	590.189	1169.36	297.568	551.138	227.531	1010.81	647.717	173.017	291.767	179.908	823.201
580.098	155.77	35.3805	257.623	159.355	157.787	172.669	276.495	208.331	220.603	470.307	351.397	240.717
273.134	923.507	1767.39	2833.86	2016.98	1460.38	686.86	2354.35	1582.86	417.911	869.084	2128.44	1839.17
725.134	180.974	73.9028	264.783	153.328	188.009	213.953	300.991	183.145	254.646	457.488	349.931	244.366
724.621	115.87	6.10313	164.268	113.476	114.07	122.544	224.956	139.217	179.622	340.731	246.247	156.67
330.039	79.3793	81.3449	134.867	104.744	90.5159	75.3425	112.622	105.193	89.0714	115.832	106.196	89.1987
169.09	1013.58	1733.53	2093.21	1148.01	1263.94	894.938	1703.37	1396.08	610.135	1102.24	1082.89	1716.65
553.228	308.059	472.458	924.045	366.057	350.542	181.879	782.573	505.094	145.618	351.087	195.571	731.572
537.231	540.413	552.534	866.922	449.919	518.293	232.993	1187.59	599.27	202.093	341.01	306.311	965.585
306.131	130.826	80.1801	168.109	291.436	390.526	257.048	280.616	342.992	352.608	193.053	340.73	274.871
194.081	398.06	672.312	991.997	940.255	2245.82	1480.05	3991.27	1097.68	3616.6	2128.61	1230.72	1692.27
520.123	195.001	759.737	110.989	414.45	1061.23	737.278	650.597	201.172	469.596	384.038	524.389	290.831
516.612	16.0421	8.59347	22.3387	60.4944	181.203	94.7802	107.013	18.4784	86.2663	54.1421	77.7246	38.9277
76.039	11.8825	16.9906	25.9738	33.247	70.3407	47.1192	113.604	35.6265	102.499	66.1864	44.2531	50.2063
422.103	129.706	499.645	129.003	226.57	605.02	339.228	410.515	146.123	248.453	229.324	282.543	219.432
500.164	134.301	342.188	233.323	243.124	465.662	256.126	366.675	174.314	197.92	197.641	289.894	216.319
404.022	35.8306	30.0662	30.7305	65.4211	132.798	113.066	55.1001	44.353	81.4775	72.7116	98.8375	34.2857
276.531	4.44006	6.36719	3.87587	18.6485	33.9061	22.8405	15.3212	10.1386	12.6482	15.9625	23.2373	6.94989
543.743	58.0295	11.7443	67.1485	74.3291	108.282	104.448	64.9225	71.9245	71.3049	67.1058	81.5176	49.8419
745.35	172.534	76.3694	304.754	263.104	282.439	377.809	327.23	277.539	240.612	364.542	248.599	229.321
744.858	212.161	9.32358	360.677	313.282	356.41	585.643	413.186	373.772	307.114	513.582	322.968	266.68
745.116	202.519	48.2085	339.226	307.171	318.657	546.083	421.144	347.229	315.89	519.653	314.577	275.416
497.143	2764.97	13412.7	2309.09	6191.48	18469.2	9835.61	10959.4	3060.46	6269.82	5952.05	7619.23	5705
519.12	594.148	2794.97	452.242	1338.34	4034.36	2794.98	2345.51	696.748	1646.21	1292.48	1737.73	977.672
475.126	67.8067	226.183	110.071	145.327	247.64	179.122	220.787	105.045	116.93	115.29	154.761	105.183
744.612	139.952	4.41472	209.137	196.928	227.53	369.59	246.144	218.206	199.742	368.051	207.806	179.007
498.143	702.112	3378.2	686.75	1593.76	4524.52	2504.38	2753.31	924.129	1630.43	1548.08	2008.16	1481.27
745.619	77.6512	3.58464	135.747	107.359	151.331	189.896	152.806	124.354	124.968	182.531	115.287	98.883
268.043	49.5237	19.3813	42.865	107.084	202.685	158.661	88.0409	61.9899	89.8714	125.816	138.682	59.0238
275.528	11.9017	46.1161	5.14691	35.1953	77.511	62.0724	37.4976	11.4993	40.5044	43.7094	61.0707	12.4054
350.103	196.791	786.44	171.519	384.163	1051.79	593.412	655.98	229.865	394.312	370.169	482.452	335.414
216.074	117.78	140.47	256.866	273.256	555.733	480.675	1027.79	303.306	947.212	560.258	379.831	356.567
157.544	3.24059	0.974418	10.3435	9.69031	17.9307	16.9629	12.1844	12	24.9692	27.2153	14.3077	12.8804
992.807	95.2118	4.99296	82.9712	81.9382	113.262	141.633	111.576	82.1604	81.9714	109.326	88.9749	67.5585
550.053	100.06	218.944	67.2548	141.836	312.954	225.908	171.601	89.3134	184.848	168.741	207.809	103.67
276.029	37.0701	23.927	28.2956	70.0451	131.232	108.808	45.9121	40.3572	69.7067	85.6369	108.6	33.9726
286.016	72.904	89.7041	143.9	97.4047	82.3603	70.701	117.56	92.0403	65.1224	95.4963	126.82	96.9878
148.546	36.9692	0.940616	55.5171	27.1364	40.2611	33.3336	17.7302	27.757	22.269	34.8514	30.1352	29.5378
259.153	325.813	614.48	657.668	655.173	643.78	385.718	635.677	576.553	327.153	464.948	905.953	527.184
472.68	52.2826	58.7747	64.5968	78.7047	105.058	80.7931	81.7809	72.1919	64.3202	53.1566	98.7453	42.2098
646.305	403.126	96.0557	294.331	4992.3	1345.29	605.491	3950.96	1935.6	1099.91	254.382	224.648	226.635
431.875	114.375	16.1575	73.3006	1789.32	370.111	179.964	1269.96	728.342	291.03	73.0473	51.8914	55.8462
431.541	222.851	8.32438	138.956	3939.26	829.118	409.579	2830.63	1422.91	639.638	152.271	103.682	106.644
646.808	226.483	5.4471	150.431	3336.28	829.813	362.924	2547.81	1260.23	730.221	134.99	105.497	100.252
359.691	43.6673	6.61301	60.3998	56.2588	69.9568	67.0678	38.234	70.1998	49.6128	53.7934	50.8477	37.923
265.106	834.936	1202.87	1521.96	1060.63	1182.36	762.844	1373.58	1112.2	660.663	977.486	779.135	1157.6
148.039	673.501	244.122	335.831	352.934	609.963	231.359	1684.23	490.118	556.854	734.88	1190	788.413
230.044	56.7311	71.7623	63.7362	73.222	68.2426	99.1668	66.179	72.516	68.1707	89.9052	75.159	53.7027
321.674	70.1689	17.5254	66.4081	102.75	95.5204	100.231	85.5479	90.4015	74.1833	97.3897	99.8115	59.9778
551.635	61.2401	9.99123	85.4069	61.0638	53.7907	34.6126	135.284	89.9993	65.0306	180.63	143.334	121.913
620.371	841.355	99.179	937.914	940.215	1053.53	963.093	852.603	946.23	780.481	1000.83	1026.86	793.49
156.538	24.4436	1.55433	26.59	15.7408	20.198	25.4655	18.4754	28.0714	19.4746	33.4764	38.4395	30.2869
300.682	228.513	3.72232	296.015	329.705	310.115	314.431	294.261	333.367	220.527	348.303	344.767	230.948
309.688	196.074	10.8308	234.406	281.598	272.269	276.766	241.542	287.06	189.39	292.653	286.344	201.882
618.372	10186.5	107.049	11732.5	12491.5	13203.5	12349.5	11090.3	12603.6	9919.04	12676.9	13059.1	10988.2
214.046	94.8448	93.497	100.911	63.8212	62.3633	131.214	90.717	105.036	100.888	130.334	258.727	80.0462
619.374	3133.31	111.959	3610.66	3857.15	4117.6	3815.29	3442.04	3928	3076.77	3879.78	3885.68	3257.89
320.68	776.978	5.19145	705.482	1107.14	1079.41	1269.63	751.031	962.902	794.461	1102.53	1126.84	559.912
543.242	622.881	749.84	1196.75	493.435	749.738	346.881	877.683	652.688	290.044	272.14	479.044	1083.85
192.066	357.743	323.432	444.311	196.191	201.352	322.594	388.238	397.247	313.867	470.398	906.147	385.259
141.553	12.6153	0	14.6469	22.0752	17.8588	38.9036	18.0288	28.6236	25.6294	22.3752	32.4837	17.4951
278.175	844.581	128.903	3436.65	290.774	1430.91	728.077	2591.26	2270.42	381.833	893.974	392.695	2547.91
460.276	365.409	751.021	886.87	1173.77	610.216	639.553	881.927	629.297	553.233	552.331	1837.35	571.596
283.116	1773.5	3075.55	3591.93	1687.61	2746.2	1636.35	2955.73	2580.74	908.106	1535.56	1511.91	2939.11
476.286	240.612	477.784	704.981	960.514	520.568	467.508	521.252	508.241	355.394	489.912	1493.96	486.154
527.052	136.097	1638.02	318.479	144.375	284.829	678.909	631.176	832.353	180.45	348.78	280.385	235.85
482.262	464.29	1381.65	1507.69	2227.95	1159.97	1248.11	1286.02	1053.15	724.165	1024.51	3434.1	1024.78
459.28	881.612	3017.94	3395.88	4908.48	2183.6	2541.25	2481.81	2212.57	1306.42	1920	7796.24	2011.91
481.262	1821.44	5633.17	5882.47	9159.43	4209.57	4838.68	4493.35	4001.1	2613.9	3436.82	14445.2	3609.74
423.75	141.65	9.17397	155.449	343.45	370.898	287.863	263.748	202.235	246.308	166.797	279.481	86.3723
495.237	414.835	682.595	746.91	1262.9	874.419	594.939	1029.76	829.284	472.1	649.191	1721.71	641.279
431.104	1333.76	7410.45	4108.94	6099.36	3457.21	14219.6	13561.7	9667.91	4572.05	4351.56	1749.17	2839.05
480.689	77.7097	26.2349	100.854	118.131	72.5439	69.2749	118.869	109.72	109.27	82.1268	150.662	61.2954
432.106	333.795	1773.13	1026.82	783.253	624.323	3324.13	2884.02	2246.19	1100.23	1114.66	461.463	738.282
479.689	226.249	22.3178	283.007	346.752	199.328	159.71	329.302	351.572	350.263	209.646	472.571	109.337
319.165	661.772	130.055	1150.43	682.908	687.727	522.559	1129.87	657.115	466.668	453.262	991.997	791.293
107.048	39.4374	36.4977	47.6968	25.4241	41.4299	57.2304	73.8048	78.0976	33.8256	69.9881	77.8519	54.3825
510.832	540.583	10.3386	333.947	769.671	1586.52	1969.98	791.325	794.599	1358.78	320.41	441.007	264.178
353.158	1329.31	2135.07	2719.93	1482.07	1966.09	1291.68	2530.81	2035.41	887.34	1412.05	933.191	1974.62
847.877	617.437	3.40214	412.926	2494.19	3777.64	557.987	1476.98	580.521	260.826	101.374	998.632	150.412
386.251	518.672	138.977	722.677	555.721	589.73	428.044	791.778	688.829	590.133	558.731	983.063	400.568
147.564	25.9916	0.646818	24.2934	20.4253	20.4738	33.922	19.2608	27.12	20.4519	36.3417	37.5683	16.3948
434.694	48.8654	82.5827	74.8481	95.7307	60.7853	30.8012	130.632	118.722	41.48	57.1453	69.1863	43.4082
174.107	640.514	731.457	1041.13	547.726	578.502	1224.15	809.043	1005.39	651.588	970.824	810.114	624.794
156.101	182.885	206.227	278.066	162.258	171.855	307.312	213.916	253.998	180.295	252.202	196.157	169.24
385.762	891.037	3.30102	1396.13	938.091	1117.03	706.567	1468.4	1308.42	1196.21	1086.84	1841.71	663.048
386.759	103.197	2.27141	172.862	110.459	147.423	76.4026	182.051	147.282	149.931	121.283	211.453	84.2028
716.828	99.4667	8.92401	108.261	129.919	133.633	127.136	135.631	90.3263	95.6713	112.618	132.708	91.5133
271.117	1129.29	1311.5	1497.16	1095.19	1638.99	1028.33	1189.09	1180.68	433.549	843.516	1215.44	1187.93
462.112	185.544	561.944	187.238	74.312	194.171	786.004	809.334	692.789	250.715	392.119	232.673	246.629
562.317	292.08	132.92	382.856	892.008	585.57	393.629	834.454	534.268	358.707	711.893	404.477	280.747
664.086	81.5204	19.0674	78.0463	62.3135	80.9593	80.0235	60.9536	78.1273	105.655	107.332	128.066	67.8919
461.112	609.665	2094.67	704.903	254.765	654.497	2892.22	3085.01	2491.99	867.932	1359.29	699.894	847.103
664.588	69.4178	1.77521	74.2225	83.4518	88.6362	99.9677	53.1307	87.8211	95.1918	122.125	128.66	73.7844
433.113	994.254	955.811	523.426	141.264	627.602	3629.33	2808.05	2528.37	279.778	554.248	705.116	727.721
415.727	94.6826	16.5343	57.282	65.8325	126.559	208.44	62.4049	53.7981	145.593	157.694	132.507	73.5152
352.717	118.712	7.7152	93.8054	81.3192	376.942	235.723	94.0381	135.796	89.1507	33.1424	210.85	42.3663
861.869	132.413	6.45035	69.2847	142.373	325.234	350.124	89.1933	76.9233	85.8883	45.0519	97.0934	35.8258
860.865	249.179	9.83896	115.503	290.662	625.984	758.681	134.236	159.663	173.846	70.2631	189.73	60.8323
850.376	1037.99	33.1152	647.744	1355.99	2773.64	2956.09	754.967	732.271	798.962	327.604	750.454	341.808
850.877	521.487	11.6242	296.782	640.421	1417.96	1504.83	353.811	326.204	401.139	158.035	374.628	167.905
849.875	1217.56	2.98661	717.55	1571.66	3293.62	3440.1	879.609	832.034	945.331	386.053	883.389	355.456
652.359	811.146	82.3143	511.706	659.654	1694.66	1837.72	441.988	541.47	655.097	354.351	724.759	347.148
652.865	300.505	8.53614	202.786	234.279	645.092	762.578	156.755	186.349	264.915	122.32	300.121	117.447
434.915	255.913	7.22107	167.073	202.864	584.26	645.757	180.724	164.718	241.828	106.35	239.239	93.1111
651.865	1012.51	2.42013	639.216	811.997	2155.64	2483.85	497.43	627.262	873.272	403.726	938.6	341.978
504.298	196.649	469.74	528.244	839.342	380.34	437.146	560.18	408.42	257.73	366.007	1518.87	423.775
567.79	220.662	8.9906	303.077	255.202	541.099	506.127	273.22	372.221	276.136	287.497	322.218	228.484
503.304	628.881	1615.87	1576.13	3260.86	1282.91	1519.26	1833.46	1415.47	866.793	1318.44	5774.49	1388.07
525.285	1218.6	2813.45	2769.04	5504.35	2433.95	2708.39	2011.98	2411.37	1367.43	2147.98	10002.6	2351.09
568.792	72.508	10.7416	87.2933	66.1729	142.7	135.992	70.8345	94.6429	71.3134	64.1827	96.1095	55.1819
218.027	121.406	6.65574	400.778	1033.04	770.19	172.335	89.8436	163.663	41.7429	82.4252	149.707	47.6271
306.529	25.768	1.42206	29.5514	56.8629	49.1439	52.9262	31.4146	41.9771	35.3116	23.2047	37.2565	11.1468
539.265	444.706	585.647	695.115	950.571	521.647	496.536	601.392	676.096	259.958	529.742	1351.05	526.237
425.757	73.591	3.23739	39.6001	52.819	143.201	214.541	27.6164	43.5505	3.89784	41.0073	83.2597	18.5144
120.043	34.9176	20.5135	30.6728	24.1867	40.0195	40.4287	89.1953	44.5479	33.1526	50.9496	72.8131	48.2021
912.105	107.949	17.9926	90.4812	106.341	203.561	269.952	80.8329	132.889	119.494	122.159	129.213	86.4318
269.038	72.5437	82.6589	106.589	131.015	104.112	96.296	188.874	209.523	83.2875	114.675	178.662	117.941
157.085	734.523	1429.5	1596.11	1522.39	1175.01	993.25	1473.15	1678.93	694.355	1183.5	2132.78	1395.03
270.043	131.279	36.7113	197.398	250.682	209.322	196.924	109.874	233.055	145.041	215.21	312.145	150.099
197.084	802.247	1295.22	1349.26	1360.42	1176.54	1134.92	1197.48	1455.54	659.895	1082.03	2122.13	983.218
488.121	90.5942	43.4916	255.92	133.867	82.9191	94.8596	100.017	133.069	101.484	279.623	187.495	251.722
127.537	17.797	0.721618	28.4874	35.131	27.5239	27.8166	21.6658	36.2311	21.5002	43.2249	47.1713	27.5137
748.744	138.047	17.6218	151.742	131.573	98.838	92.8354	166.629	150.006	119.158	225.11	229.103	131.194
274.016	50.7458	64.0069	100.195	94.605	83.068	73.4131	99.9477	99.0527	88.4599	79.3011	121.479	84.35
153.062	316.207	556.749	767.726	837.254	832.215	720.803	926.353	762.009	404.893	972.521	793.326	471.616
336.216	481.114	202.564	1599.19	291.392	644.848	359.283	1270.13	906.321	150.523	356.81	209.355	1193.54
862.374	272	53.8912	58.6643	3105.59	1977.25	905.753	1924.79	489.273	2085.64	93.8774	69.5749	117.141
125.095	300.846	408.743	477.327	435.738	423.391	213.099	422.721	355.464	232.056	280.781	274.476	362.356
341.158	1918.07	3009.62	3435.9	1484.31	2702.19	1525.34	3177.12	2512.51	789.953	1588.91	1268.66	2151.47
862.876	182.913	13.0596	27.8852	2820.48	1735	765.491	1755.15	425.558	1888.11	77.0054	45.3726	90.6218
193.084	907.411	1336.1	1399.87	1234.61	1296.35	1099.74	944.538	1163.76	736.078	1274.28	937.472	854.272
513.582	351.304	12.3396	113.978	3146.75	2391.54	1795.74	2265.22	1468.27	932.428	89.1471	65.3733	81.4491
512.914	1715.2	0.944265	501.819	17712.4	11683.7	8546.66	10927.1	7213.66	5048.37	378.499	274.594	355.005
512.58	1942.48	10.0354	622.952	18133.4	13678.2	10347.8	12657.5	8151.17	5040.17	425.445	327.455	439.097
768.366	575.627	57.8128	218.313	4712.02	3629.86	2788.29	3297.4	2204.95	1023.03	146.376	135.197	144.844
768.868	462.125	24.8584	151.072	4114.98	3052.67	2320.39	2609.45	1826.55	899.065	96.2927	87.2889	87.9391
769.368	313.016	86.2264	172.89	2121.75	1717.53	1287.75	1535.91	1002.35	512.457	104.447	86.4351	105.642
769.87	109.755	33.4569	42.7462	833.934	636.232	467.554	555.198	367.954	185.124	34.5807	32.2692	33.1608
513.248	1221.35	262.31	699.421	8448.94	6594.64	4714.32	6039.58	4003.16	2405.04	423.308	350.277	532.573
186.112	1783.89	751.523	1606.2	3278.47	3034.66	1451.7	3199.02	2313.66	794.416	1010.49	2737.94	1580.44
569.31	824.579	1708.14	1741.64	4042.77	1523.64	1838.66	1880.63	1819.49	1030.95	1388.81	6156.95	1558.93
185.542	29.2704	8.7992	18.8191	36.4399	39.5257	23.3114	33.6728	23.0424	12.853	11.6352	31.6263	25.085
303.043	135.155	14.7268	99.8834	57.35	56.4926	159.796	90.7863	137.908	130.678	234.95	247.019	82.3197
547.325	422.512	951.599	891.518	2403.01	808.904	1037.56	1048.14	951.51	688.424	838.166	3555.98	906.571
428.205	880.766	1472.76	1279.99	971.136	1856.8	291.978	1038.18	920.979	406.666	368.197	1138.46	838.924
775.377	277.785	70.5669	355.399	403.195	513.404	430.259	577.401	488.746	417.263	193.136	349.312	164.43
690.665	118.944	13.0491	114.847	222.851	173.201	116.38	284.793	456.722	128.945	104.043	141.165	53.0088
765.659	319.967	1.27639	371.689	488.174	214.352	74.6801	623.435	787.309	192.952	343.506	429.325	218.001
686.921	117.961	10.5211	278.174	375.766	434.749	474.016	750.233	547.373	123.83	644.77	428.084	167.604
765.16	644.571	67.0157	750.715	970.885	404.095	154.364	1244.65	1619.41	79.9707	712.337	920.978	465.807
458.62	40.6779	56.6422	116.856	140.936	167.216	155.644	265.546	194.38	46.9062	228.641	169.873	58.6056
765.911	157.655	4.34382	177.339	287.628	135.227	51.8043	319.903	382.178	124.458	177.847	220.423	101.394
687.406	192.271	203.204	280.135	377.658	475.064	411.136	702.485	546.308	110.341	552.871	428.231	273.299
764.904	404.127	25.5317	454.774	593.515	237.055	89.4985	789.25	993.529	233.306	452.892	562.087	264.68
765.406	575.803	29.4576	708.389	864.327	420	136.583	1135.33	1368.56	339.941	609.626	777.756	401.316
123.525	20.3419	0.579113	11.8416	9.03394	5.21275	35.6345	18.4161	24.6603	12.0131	40.7866	35.4474	9.88789
770.59	94.8019	2.75354	59.9067	98.3688	90.8651	54.7723	231.548	108.207	106.922	139.8	149.799	134.76
924.094	173.111	8.84569	74.6158	97.5856	113.83	82.5924	373.605	160.668	159.079	254.49	275.916	219.821
924.488	186.82	4.17322	83.3624	113.104	142.795	82.2424	406.846	173.374	165.635	288.99	303.359	254.592
924.696	153.11	7.85911	65.5757	93.215	96.7639	60.3973	265.902	122.945	127.485	210.577	206.503	170.969
261.185	158.276	72.1075	365.046	189.717	219.664	282.239	212.445	1404.93	233.095	2042.83	189.855	958.846
331.14	348.63	657.021	468.117	736.596	400.756	369.577	446.432	475.57	225.375	348.01	1247.6	343.243
260.186	740.888	85.944	1260.44	959.149	919.67	1779.94	750.873	8965.44	1434.83	12979.9	1096.07	6004.61
259.386	3.42891	0.169977	11.645	7.37704	9.45164	13.6187	2.2755	85.0117	11.9804	127.732	8.79524	57.2689
182.19	402.903	84.9852	1079.14	1307.12	1087.83	809.031	747.319	935.972	1032.81	1451.28	1243.72	753.34
183.193	52.4361	12.7106	140.612	178.222	149.427	105.479	98.8361	139.355	132.13	185.076	167.351	103.094
371.134	358.464	644.527	419.229	753.176	374.19	532.968	282.119	378.903	227.912	325.465	1190.67	295.72
208.097	1646.42	2015.13	2984.52	2121.48	1128.28	2076.19	2084.14	3604.13	2020.82	3402.62	1869.85	2192.32
230.083	401.168	476.053	563.864	555.7	319.018	646.276	461.698	775.186	571.542	852.282	501.511	406.353
867.101	53.2396	1.26122	54.9518	79.5711	95.1932	55.1428	120.316	90.8445	86.0587	93.4049	104.643	53.0396
866.771	79.8461	15.5131	69.0054	110.983	111.602	68.0159	157.318	132.438	120.657	114.808	140.341	76.4132
296.675	25.5528	46.1906	35.068	141.285	40.0417	62.9659	34.5878	55.7877	31.6195	47.2655	226.526	37.5704
591.359	209.204	387.873	358.719	1225.83	381.944	526.166	501.884	508.693	292.947	552.078	2012.85	468.369
592.364	69.6309	126.203	127.856	355.002	126.068	160.73	165.981	152.018	98.8371	171.626	598.385	150.463
613.333	636.335	1139.98	1086.9	2239.69	964.647	1090.7	1495.69	1152.43	718.068	1013.19	3649.66	1196.89
373.143	289.154	270.577	266.067	463.556	425.469	414.343	355.51	307.203	153.271	227.397	340.191	288.878
517.597	33.349	31.1498	39.1605	234.724	174.514	126.812	152.479	97.2594	83.3696	29.9806	48.4234	25.8204
496.631	95.4841	9.16666	77.2424	111.147	242.238	222.353	115.676	133.701	177.039	89.4301	109.929	65.8525
496.961	65.7093	2.51568	50.3214	80.3885	206.599	189.226	86.454	92.1778	144.433	61.89	82.7094	39.7854
708.217	103.229	49.6786	125.141	101.32	105.095	103.532	112.083	102.689	93.6422	182.169	118.575	142.045
506.224	355.351	406.192	442.072	437.76	579.098	146.045	597.655	410.767	170.822	180.768	318.252	330.493
199.128	523.746	664.485	638.466	768.499	818.03	967.867	701.584	767.236	539.851	827.528	812.324	476.047
252.14	293.361	339.57	424.306	356.546	446.164	399.037	640.601	533.673	345.702	425.451	345.613	390.375
128.561	8.77475	0.868827	6.83426	8.81536	10.6762	11.3416	6.36951	8.93287	9.14553	11.5486	10.6352	5.92881
293.137	1175.83	1641.76	2014.77	1471.03	1791.5	1294.53	2302.49	1664.29	883.126	1271.9	2013.91	1535.57
294.14	227.829	328.968	372.781	292.048	321.477	222.583	422.077	313.676	153.818	250.711	216.996	283.291
471.801	32.1405	3.17586	36.2158	63.4358	78.0677	57.6903	67.8739	50.0699	50.388	22.2645	46.7063	12.0807
470.797	168.819	12.8759	169.989	360.817	465.183	316.367	329.098	243.788	272.591	148.096	233.299	103.146
273.168	1967.32	3424.21	3571.6	2940.22	3248.99	2273.29	3254.37	3380.31	1732.02	2415.64	3108.22	3012.52
251.126	1411.24	2134.75	2267.57	1991.07	2393.12	1810.55	2211.13	2064.48	1324.18	2057.02	1236.03	1726.61
845.413	462.848	95.1035	286.066	332.889	630.159	435.955	539.608	330.196	623.58	738.8	586.711	608.575
846.414	246.82	68.477	175.734	244.012	330.42	290.372	266.45	180.237	378.537	424.908	332.16	315.635
318.685	27.384	57.0539	50.332	185.048	55.2217	100.182	68.0866	74.6461	54.048	81.6899	326.032	60.4161
255.122	907.328	1769.34	1664.79	959.55	1281.22	667.089	1653.53	1194.04	473.713	843.645	584.107	1319.62
423.711	130.233	62.5771	85.2689	118.341	169.135	139.468	142.995	107.367	195.705	253.65	207.081	138.138
497.765	86.6818	20.802	83.8754	119.888	119.377	122.177	81.8762	85.7087	88.7494	87.3077	108.592	64.6871
238.109	147.792	283.253	435.252	298.097	279.846	625.011	652.541	1120.41	497.081	647.672	362.585	380.732
581.191	728.355	814.131	702.433	684.694	566.314	636.741	2370.28	2563.72	1249.42	2172.36	3544.32	1482.73
582.198	265.944	463.292	266.318	244.52	215.166	220.292	752.369	847.894	381.098	695.471	1156.78	461.095
808.416	344.8	72.8469	399.132	601.595	439.347	344.665	424.463	376.901	298.06	458.717	400.748	400.352
809.408	157.966	86.1304	216.995	283.844	218.722	188.833	224.042	194.458	137.512	208.987	201.784	199.648
657.366	282.421	493.157	465.093	1418.23	643.585	644.153	573.379	621.997	365.662	544.924	2183.29	780.825
658.37	115.7	165.639	167.668	506.721	165.493	223.725	194.472	181.262	109.819	172.816	683.336	177.285
635.386	109.41	201.387	168.302	601.35	185.422	283.124	242.68	215.814	152.284	201.077	1024.31	215.907
449.114	934.572	974.362	688.132	323.74	1408.28	2351.92	2041.82	2491.69	966.719	1698.51	838.538	1338.34
229.132	509.734	872.096	1011.76	724.697	787.71	699.828	1058.87	905.793	463.634	712.777	489.021	745.978
413.214	969.063	1193.39	1139.09	867.275	1596.82	432.447	1216.11	963.609	348.081	458.846	911.824	803.983
479.22	630.2	829.911	1103.08	771.647	879.202	665.578	1513.38	946.114	341.704	584.859	784.832	682.871
387.075	312.278	404.823	301.335	275.17	156.938	199.499	159.105	216.185	331.886	212.274	264.441	284.908
412.21	2827.05	2745.82	3024.21	2367.52	5148.12	648.657	3187.36	2879.64	803.43	827.333	2790.17	1938.24
67.0545	23.295	28.8555	29.7515	32.5376	30.7258	29.793	29.8134	32.595	21.9278	31.3364	27.6819	23.7803
109.101	1522.74	2008.32	2163.61	2387.3	2251.79	2384.33	1889.54	2088.52	1354.41	2351.9	2015.93	1531.28
145.121	438.278	513.2	587.708	620.314	589.018	591.679	532.932	563.985	395.2	664.35	574.235	448.729
110.104	144.46	873.019	207.827	224.224	214.824	228.283	190.532	196.777	130.916	216.246	191.331	139.561
127.11	567.304	804.066	756.797	801.245	787.218	748.203	700.097	756.66	519.026	868.582	736.468	597.872
792.166	238.151	28.5913	209.874	253.383	339.5	214.602	454.557	345.647	230.857	289.504	408.307	203.969
108.769	13.2249	18.5366	22.7758	22.3437	21.1106	23.4025	17.4738	18.7628	11.5182	22.2679	19.2557	11.7783
792.407	289.198	79.2426	266.596	334.446	356.458	188.921	521.236	354.988	376.149	308.363	403.483	233.597
245.047	100.432	19.3868	108.443	154.25	139.76	149.507	70.7624	126.563	142.572	198.562	148.348	85.9771
244.039	55.5691	50.6194	62.3447	66.5484	66.4406	91.2317	52.8912	85.0099	75.0537	104.302	109.996	45.8929
792.943	130.291	35.1359	106.393	197.643	136.39	78.0932	150.656	157.455	176.597	176.363	189.891	102.843
478.221	754.292	314.713	852.757	995.512	1532.66	209.089	1662.7	930.753	297.91	200.061	750.581	549.016
437.713	162.468	28.5658	128.778	297.628	335.813	400.566	185.044	174.597	201.148	133.884	180.853	89.2212
714.823	48.4863	27.5118	123.793	173.313	97.6331	139.954	56.0646	112.304	144.4	395.89	119.402	107.219
228.068	334.09	286.267	303.527	229.038	276.275	427.528	348.336	684.769	225.848	474.872	499.939	231.412
409.14	174.376	252.115	327.546	224.634	191.187	179.155	304.275	568.839	132.711	321.824	335.41	272.49
448.098	188.364	1302.79	704.965	166.739	453.582	2375.1	2066.6	1555.07	889.603	947.458	329.475	666.961
447.094	620.098	5377.13	2811.85	644.775	1770.11	9726.4	8687.45	6592.54	3724.7	3851.39	1218.56	2766.97
782.398	216.833	69.8608	307.418	352.01	170.706	83.704	299.497	262.803	194.784	261.542	228.079	230.755
781.997	212.875	11.6014	300.289	381.796	150.452	82.8585	288.8	278.905	204.384	264.665	240.933	219.724
782.61	103.532	2.80649	156.593	182.879	63.875	49.5908	134.488	143.658	100.888	133.969	121.748	92.9121
983.249	186.212	52.5856	152.2	332.131	131.356	100.136	154.697	202.77	195.403	241.239	242.455	132.318
782.202	263.225	54.9266	368.346	417.847	186.85	97.0518	340.999	328.7	216.039	323.349	282.638	272.68
982.993	223.999	4.13715	185.27	390.547	159.287	109.129	193.341	233.675	232.97	312.838	298.31	141.243
163.545	24.9587	1.87361	29.319	31.9949	26.9866	54.235	53.1886	51.7112	68.5628	52.963	50.7126	24.6333
977.499	2309.97	57.4457	2749.71	3953.23	1500.99	871.823	2494.56	2752.34	2093.13	2857.13	2638.16	1990.02
977.249	2171.03	44.2424	2614.26	3659.42	1380.7	811.022	2340.16	2545.75	1943.75	2731.59	2451.92	1843.46
977.75	1715.94	11.896	2075.6	2966.68	1122.64	614.858	1811.43	2085.17	1585.43	2157.17	1994.56	1464.31
976.997	1078	22.559	1231.59	1816.58	783.917	380.922	1110.25	1229.49	988.994	1360.38	1240.03	933.783
978	1020.99	25.8643	1209.84	1810.59	664.336	385.113	1143.67	1205.72	926.159	1306.67	1196.36	861.261
978.252	536.77	45.9507	611.087	912.938	331.24	198.461	540.635	617.488	450.117	687.902	621.806	456.205
982.746	213.974	11.1925	180.975	358.747	151.747	105.835	170.772	234.416	220.432	263.848	277.987	131.566
978.5	252.485	32.0273	275.573	381.191	172.091	104.83	271.4	258.316	195.826	286.459	267.69	218.751
622.845	169.028	19.6103	54.6543	56.9334	265.448	78.6874	183.392	58.0605	81.1409	36.0219	154.504	63.8517
978.756	107.86	15.6606	108.483	152.954	69.6303	50.4692	108.844	110.775	92.8724	114.293	116.773	95.1887
468.236	1168.22	876.361	1018.35	1006.55	1944.83	224.826	1374.58	1171.57	228.339	211.507	1001.9	684.303
248.111	164.116	254.97	303.365	257.453	167.149	395.499	311.746	366.736	260.835	232.101	236.065	167.505
247.108	992.358	1270.3	1762.02	1500.61	938.89	2370.74	1815.76	2304.82	1609.87	1435.66	1378.85	944.307
340.702	39.9884	64.1813	58.6898	200.134	60.5528	119.069	81.3884	71.7214	60.5743	82.6044	378.674	63.2776
446.739	80.3136	22.6688	105.61	202.27	173.559	185.433	145.737	127.345	107.924	155.005	118.726	131.864
892.477	119.009	76.8348	154.478	233.806	236.245	175.879	196.906	155.876	125.837	209.772	158.952	234.301
201.111	420.028	595.6	891.023	468.387	512.863	461.497	898.167	639.662	297.19	440.822	407.229	700.452
701.387	306.843	531.19	300.578	799.13	318.065	441.216	376.429	344.288	265.607	318.056	1268.77	366.647
291.121	726.463	902.471	1278.24	1084.17	1165.48	796.36	1295.03	1028.9	499.756	741.246	830.733	994.654
285.133	859.873	1293.24	1140.68	1314.48	1173.68	818.053	1212.86	1204.89	490.409	788.212	1820.57	1028.14
435.256	156.134	337.64	280.47	502.525	278.145	318.568	323.33	248.628	152.906	267.159	904.737	207.984
891.458	215.213	92.4306	123.998	205.13	148.687	162.116	243.831	178.172	195.046	259.13	210.696	168.099
891.211	216.033	15.7596	99.4086	194.903	147.41	182.81	244.118	196.691	207.203	282.112	246.842	169.31
923.236	372.03	38.1071	234.53	309.347	292.747	374.399	257.424	289.618	424	694.899	446.528	406.159
923.734	262.341	12.3811	156.7	232.895	225.405	273.318	156.809	208.728	298.485	510.958	345.452	274.234
362.714	45.5659	74.2788	63.8804	255.979	65.7504	144.977	85.8615	92.5577	67.7638	103.94	489.686	71.199
923.981	167.03	64.861	116.578	155.907	164.233	174.292	110.577	136.153	193.238	293.81	218.687	181.184
923.48	370.689	97.5	242.061	332.155	330.846	356.186	236.788	301.213	396.299	667.195	458.881	408.248
738.992	157.348	8.39066	112.643	144.416	137.015	152.06	123.563	129.255	185.043	264.701	201.599	180.917
702.379	236.61	224.92	235.854	419.861	244.971	278.611	274.911	270.57	223.923	360.205	615.498	339.668
922.982	178.22	33.1324	121.94	170.476	176.198	195.95	138.815	155.327	204.183	338.472	236.815	197.296
705.2	139.47	57.9509	264.938	229.805	106.523	63.5683	110.178	182.338	349.555	798.423	249.897	282.393
611.202	2785.46	2581.75	2673.5	2289.25	2274.91	2097.29	6791.16	6799.93	4169.94	6781.27	9903.47	4853.35
634.191	170.367	112.676	142.744	158.094	129.378	157.669	227.955	249.729	205.079	259.548	395.328	171.4
612.205	932.569	932.551	891.334	786.904	750.455	701.948	2225.08	2172.55	1334.97	2165.51	3153.33	1599.95
535.253	798.773	821.815	2064.07	842.48	1181.01	596.671	2195.52	1242.16	384.863	678.475	540.727	1459.32
278.263	20.0318	9.90188	37.9262	23.0622	27.4101	21.0045	42.5983	31.6044	14.788	20.0584	17.2796	31.8263
279.121	2821.82	1292.7	5600.46	3464.81	4401.06	3020.17	5700.25	4043.01	1744.79	2891.27	2442.51	3888.54
280.124	456.904	236.147	906.06	554.742	724.419	499.327	920.054	669.678	291.205	476.132	418.761	633.799
258.142	295.496	325.378	645.633	241.818	355.084	182.341	612.007	380.387	114.737	216.847	176.019	471.727
877.716	314.063	58.6887	178.807	206.876	259.228	289.71	202.964	240.452	333.266	627.532	488.309	390.176
876.96	857.573	25.6709	510.627	616.211	679.288	755.676	561.752	682.466	891.771	1685.13	1372.86	1048.1
701.77	345.854	18.3275	244.042	262.339	280.516	262.626	237.837	249.941	341.895	628.936	500.631	415.802
877.214	877.793	46.965	522.21	628.122	663.568	736.56	511.546	658.386	887.813	1700.27	1357.38	1042.51
701.972	323.755	5.24349	229.501	227.116	273.858	261.27	231.762	256.048	316.317	610.945	470.472	420.928
877.46	653.495	139.987	415.664	458.332	501.875	542.255	437.914	454.758	633.028	1185.47	910.417	740.461
876.712	471.468	11.0167	286.572	330.766	349.43	420.569	287.234	361.297	489.596	951.783	727.321	614.477
877.964	155.116	33.9906	107.632	117.489	134.022	152.276	95.2216	124.256	170.674	297.977	238.763	185.39
168.56	34.5973	9.43133	48.9991	37.4966	42.2728	27.0491	38.1779	35.5323	20.8757	36.4531	27.7177	42.5468
257.139	1454.95	1895.9	3982.27	1533.25	2079.21	1159.02	3675.51	2257.95	801.174	1427.07	1052.51	2835.77
701.57	175.023	0.162092	131.335	136.44	151.293	146.942	117.237	150.634	195.568	334.721	264.329	228.191
882.453	158.34	127.34	95.1418	126.684	134.207	172.207	111.03	116.679	174.596	282.099	255.058	141.972
129.09	193.565	189.482	236.76	188.895	198.462	169.736	227.94	187.503	156.848	209.363	199.361	198.025
882.718	131.126	17.8675	64.5597	103.76	132.786	134.339	74.1894	90.9119	159.135	266.1	191.97	115.191
954.231	111.51	6.52113	95.4473	109.746	78.9617	147.931	228.877	188.972	511.188	150.979	156.238	77.5936
953.729	133.836	4.95692	119.713	127.306	98.2155	165.488	277.488	225.122	629.175	156.626	177.856	96.3678
953.985	172.509	79.844	152.541	177.342	136.553	197.375	332.865	249.99	700.974	161.396	213.189	100.107
259.112	401.117	147.884	578.289	721.377	487.914	194.071	882.189	563.934	237.134	191.176	438.693	337.168
699.832	51.2323	7.77077	36.1011	139.169	181.445	88.7965	106.735	81.9687	67.5263	33.3944	40.949	30.7853
384.727	45.7541	24.5252	66.0565	263.36	64.426	147.941	83.0782	90.1994	76.1627	77.4952	440.99	73.3416
660.027	144.576	3.23816	50.5653	85.9859	120.755	219.066	185.977	93.3259	303.202	289.787	260.612	144.641
427.874	103.503	6.16392	29.1047	40.8798	130.934	135.914	50.5431	41.7328	178.37	70.611	152.921	26.5848
410.575	53.8999	0.616931	13.96	14.5364	56.9107	48.4504	37.1055	20.8757	47.9052	23.2928	60.9781	20.0259
422.554	109.645	0	31.1247	41.2884	148.643	145.497	60.0119	49.1947	162.424	85.448	182.011	39.351
625.829	197.165	9.91462	71.9275	89.475	277.267	290.069	135.161	89.6659	242.903	108.469	292.277	70.9848
409.903	159.466	3.26285	55.4662	49.7922	183.711	180.876	131.038	71.7221	147.443	76.7743	184.822	59.8164
614.347	11823.8	111.995	4036.65	3547.5	15508.8	13270.1	10876.5	5138.46	12117.7	5828.33	14533.6	5081.78
614.848	7956.52	1.01581	2682.3	2395.16	10556.3	8964.09	7266.9	3433.06	8129.41	3922.7	9813.94	3326.17
615.347	3226.42	107.214	1357.82	1103.58	4409.75	3708.23	3087.02	1495.73	3213.58	1639.97	3958.76	1530.84
453.263	111.95	130.503	354.946	175.909	458.79	624.535	765.242	564.651	428.284	351.66	214.017	341.823
615.85	911.347	10.3053	290.837	303.238	1231.12	993.464	809.687	399.801	933.442	463.011	1081.2	418.935
474.287	3046.87	152.984	1865.44	3353.71	8781.34	7393.51	3455.87	2170.42	5288.9	1316.75	2875	908.798
474.789	1583.48	2.08746	937.735	1783.89	4722.04	3977.85	1795.16	1121.14	2914.65	679.98	1484.21	437.74
475.789	119.995	4.80796	72.0656	145.671	350.757	283.88	149.002	95.275	216.062	55.4979	108.652	40.6682
475.28	643.766	323.102	621.127	716.53	1758.58	1378.06	876.292	569.81	965.859	328.031	611.704	372.917
683.344	447.628	118.36	513.862	324.902	603.77	687.709	743.604	417.136	163.604	279.468	381.545	426.075
335.018	193.933	106.986	527.783	110.601	188.782	991.409	1383.34	1888.61	477.233	505.426	278.52	240.929
683.85	208.547	22.0211	157.91	152.724	292.294	457.072	221.942	198.848	219.844	260.47	209.349	105.038
513.086	202.923	51.0525	101.379	106.258	163.916	317.932	188.518	196.048	108.053	215.198	283.365	148.527
131.048	238.714	137.664	205.564	637.384	717.077	671.403	339.57	702.192	169.167	251.368	573.101	153.346
506.712	84.5626	11.3837	42.578	68.899	125.417	82.7122	60.1043	41.599	249.741	124.253	126.037	60.7746
859.252	179.717	19.7478	91.6494	72.2746	117.732	454.833	214.153	238.08	42.8865	123.304	247.727	148.233
419.136	1724.62	314.775	1167.53	735.665	1414.03	3356.22	2433.42	2645.17	383.04	1629.15	2246.61	1706.63
243.103	1160.58	324.495	822.207	509.886	971.299	2153.15	1548	1699.18	268.296	1115.28	1363.9	1125.68
688.809	133.302	8.58321	50.7549	38.0441	113.296	159.144	155.218	74.9445	47.8457	105.589	188.344	91.8896
244.107	181.833	72.5832	137.362	112.618	173.294	379.719	260.581	294.245	101.659	201.866	239.106	193.767
624.213	265.881	63.9709	158.433	267.119	471.288	851.972	373.748	736.427	86.6859	239.238	574.78	218.962
959.504	517.895	80.169	239.741	305.254	778.794	439.404	531.358	231.974	879.323	485.966	616.673	459.151
958.504	901.932	99.3674	393.879	421.589	1403.42	821.214	850.58	384.438	1397.76	837.613	1183.4	818.464
401.126	199.963	57.7629	167.522	133.948	229.817	366.558	285.658	309.996	100.526	230.58	282.645	243.435
479.754	1033.07	270.893	483.168	509.117	1510.54	1173.16	1063.32	613.245	1663.75	1250.16	1576.03	855.636
420.137	442.868	79.7782	281.978	200.146	363.597	857.049	606.699	654.956	130.456	445.811	583.475	435.635
480.755	194.464	116.97	97.8491	99.2968	275.576	220.608	204.835	114.209	331.724	234.075	303.435	168.25
480.254	793.787	112874	631.143	597.967	1236.01	785.022	1046.14	567.343	1093.91	876.356	1206.09	800.865
421.139	160.448	18.1903	118.091	86.112	124.788	224.655	203.255	195.592	79.2672	180.603	201.24	163.356
188.164	43.4675	22.63	58.9242	134.874	88.2608	79.1591	63.2896	86.9869	70.3359	65.0536	165.882	94.4988
424.21	861.052	141.587	771.201	985.76	1599.19	275.617	1092.06	800.02	432.761	258.946	1017.69	602.751
399.036	45.143	1.96606	26.2352	17.1932	29.5972	95.6463	19.0668	66.3866	29.1732	43.3586	59.8017	18.1399
197.534	12.2126	1.38298	7.87364	6.88569	10.789	33.1661	7.72193	22.9448	10.1332	14.1513	14.3966	9.57341
509.212	392.826	208.707	463.319	485.593	454.566	756.076	574.994	755.614	366.674	375.446	732.922	390.094
365.034	56.7109	1.88272	48.9747	13.2783	23.1366	103.534	190.64	246.616	25.185	56.9709	72.5974	57.094
362.137	169.726	25.7935	154.892	238.398	301.679	130.747	152.27	112.506	148.621	130.796	171.538	119.889
619.223	327.793	10.4254	200.856	373.722	298.784	1290.62	231.623	923.79	253.406	222.956	805.946	247.308
540.129	99.7735	3.43514	74.7663	59.7021	85.449	175.69	70.8654	123.088	98.2441	98.7912	156.061	73.9333
430.139	349.9	117.566	451.783	1172.53	545.977	522.894	430.097	574.619	745.052	591.791	1489.99	499.071
833.475	41.7541	232.652	70.9318	319.799	92.9433	113.691	119.474	82.1784	71.4631	77.1061	481.849	127.859
170.574	23.8433	11.2667	37.9709	39.3701	31.8789	30.8413	33.3515	34.1973	21.9953	32.8649	44.4391	29.3488
406.754	30.3287	14.9138	36.6146	202.942	38.7133	106.449	39.8459	17.2132	2.90733	60.4033	279.865	35.9382
361.142	599.594	82.9012	630.809	935.339	1297.98	616.9	650.298	517.288	489.41	489.524	692.064	493.012
210.45	6.94709	5.72075	15.6457	23.7445	19.5315	20.0119	21.5465	14.298	12.8972	16.3979	25.0398	12.602
171.101	1943.45	889.179	3219.67	4133.06	2561.1	2558.1	5813.6	3529.66	2258.71	2553.46	5015.22	2866.87
211.095	1029.65	351.669	1602.63	2793.53	1752.82	1885.63	1704.23	1647.75	1669.21	1708.68	3172.72	1481.03
134.546	18.4587	5.14535	27.2754	54.7479	32.3717	37.761	19.6658	25.0915	41.7757	47.4101	50.0019	26.0295
316.14	220.201	72.2585	383.258	162.194	196.723	366.078	464.451	382.705	146.788	181.873	276.022	341.403
155.557	42.9345	1.59632	60.2941	83.6373	57.921	120.604	79.6823	55.4158	76.697	70.3409	64.6922	46.3149
172.102	328.639	206.36	472.88	545.382	418.323	518.084	415.322	496.945	298.262	359.629	652.131	361.102
212.092	552.255	124.576	737.143	1112.54	1173.64	2300.02	779.143	768.907	802.782	861.706	1004.89	348.508
88.0403	18.0833	31.8829	24.4812	19.2129	20.334	45.7987	23.6806	28.9984	12.4304	17.292	21.2777	11.9187
428.759	84.0245	24.9726	83.5459	292.336	130.87	224.104	92.7285	113.211	78.1438	106.749	424.813	88.7173
91.0537	46.8028	41.0792	106.331	52.1869	79.2835	51.9043	152.615	66.8899	139.204	188.333	89.6565	216.788
362.254	170.37	262.031	210.584	505.903	801.844	221.55	273.815	310.465	210.853	304.264	462.67	139.709
428.264	112.422	121.208	187.804	520.907	163.66	327.256	192.329	259.008	163.357	187.198	972.083	190.404
379.209	751.161	486.742	1463.15	730.682	663.612	355.013	1887.7	2122.46	3340.44	708.705	1626.73	1102.3
784.756	91.0018	38.5953	88.9657	236.348	479.204	723.204	155.633	117.588	319.013	125.148	89.4144	87.3663
466.221	633.335	292.513	664.085	692.808	1373.43	146.509	690.225	584.5	255.55	174.178	614.232	505.857
315.145	634.874	403.869	1690.39	660.405	846.564	397	1590.13	997.794	248.141	505.596	424.53	1319.19
270.17	221.387	127.669	260.78	319.425	375.289	543.729	426.197	607.488	141.63	257.551	303.066	224.145
176.07	244.889	188.555	642.596	145.745	127.583	455.31	473.809	641.295	482.948	973.783	708.762	648.01
282.012	395.065	0	235.423	162.003	64.2106	220.245	117.338	284.821	124.853	282.06	414.801	164.33
477.733	73.0675	9.65543	76.2899	134.03	107.915	100.344	122.979	146.872	131.739	62.3824	84.4244	42.9285
341.011	316.575	0	171.001	108.418	39.775	144.493	97.0563	207.593	101.847	198.708	322.421	108.738
297.984	264.22	3.38864	151.838	99.9068	43.5389	131.943	59.3181	181.573	82.8101	181.886	278.348	89.3582
339.01	1064.39	0	573.462	392.248	134.041	519.997	231.405	730.793	323.438	709.524	1096.21	363.02
430.783	275.749	0	227.321	316.359	642.119	642.367	569.32	423.633	895.622	251.334	395.04	162.173
797.873	34.9717	161.129	17.3045	295.643	318.908	175.218	123.184	103.608	144.63	16.6711	15.4879	13.5652
360.022	142.362	0	52.6873	67.5646	30.4641	97.2968	35.8098	87.2317	60.0277	110.974	148.676	48.1262
241.682	20.7348	38.8476	26.4127	96.3218	37.2563	37.853	31.7316	39.8204	36.4674	31.7163	106.789	26.7114
121.028	48.1292	9.70106	29.7573	20.5963	28.4146	42.5984	139.856	105.392	34.9863	80.1548	59.5588	84.8942
139.038	165.518	13.8621	108.796	57.7916	89.6803	133.264	480.258	343.023	121.585	267.148	200.203	282.631
213.113	1127.57	605.453	2167.84	652.571	919.961	549.654	3455.3	973.438	765.043	694.118	734.14	1237.7
186.221	745.527	20.4069	1007.18	1278.28	1250.72	1367.8	960.437	1323.94	1014.19	1116.85	1169.6	821.413
187.223	102.232	13.4172	139.293	172.388	183.617	193.854	138.276	181.113	137.622	153.952	161.189	117.395
231.159	149.746	243.054	269.924	131.046	150.649	106.001	255.163	208.282	91.7526	158.816	102.105	206.336
207.16	38.361	62.7818	88.4984	47.2946	63.7785	51.077	77.6022	85.0256	32.9515	46.9753	47.3799	73.135
332.212	470.277	510.901	832.157	945.794	857.654	729.672	777.69	929.07	504.715	541.728	1018.03	918.84
331.21	2072.82	1382.38	3015.21	4583.33	3799.42	3170.44	2650.07	3559.33	2582.39	2374.34	5254.03	3249.03
940.688	125.602	6.0051	265.365	22.0745	29.1552	27.9354	81.5665	212.199	103.486	384.198	415.956	128.161
941.353	210.759	1.49455	439.533	65.9041	63.6504	72.3331	198.45	369.692	178.479	607.723	592.333	206.791
941.02	179.35	27.0286	372.072	41.9837	35.6966	42.8933	149.713	341.239	164.283	549.842	576.673	165.506
942.021	94.1635	78.8673	200.363	20.7235	31.8419	34.4272	82.4032	187.959	88.4251	272.317	296.447	89.7957
224.094	432.451	271.969	655.987	723.64	653.91	944.076	573.761	705.411	491.721	592.408	600.717	373.009
178.086	399.681	294.965	647.213	678.905	648.748	979.153	563.991	706.696	490.011	599.159	599.463	358.532
835.128	558.958	0	447.066	581.167	1141.91	637.403	857.632	729.167	544.939	601.135	807.784	430.73
246.077	223.865	38.7788	290.831	399.315	361.554	643.576	277.217	305.979	309.8	333.909	339.72	181.571
835.46	907.562	152.537	793.307	1000.91	1619.15	893.953	1423.91	1206.04	861.198	956.215	1185.25	708.033
843.13	74.9748	5.68702	56.6683	103.558	118.078	104.05	83.8616	65.5226	88.7323	98.3283	105.776	58.5543
835.794	765.393	0	572.813	895.322	1201.61	688.275	1114.51	963.815	732.952	797.547	946.286	549.565
842.786	83.781	9.95053	60.9254	113.196	157.115	119.095	111.31	84.792	99.9868	115.146	121.172	60.8902
836.129	444.212	0	339.491	470.101	640.662	341.932	641.213	538.235	412.938	466.164	533.377	299.174
836.804	104.842	11.276	74.0836	108.595	119.693	78.2881	126.627	95.2153	101.84	84.0423	100.416	55.246
836.459	218.669	150.595	172.547	276.024	286.749	172.09	326.75	262.736	210.48	225.041	247.266	161.578
788.929	675.508	109.605	252.818	457.949	955.447	1001.03	795.705	308.709	1020.38	430.4	816.876	286.454
912.483	519.134	144.541	175.083	303.832	672.599	863.555	668.299	197.347	733.536	420.231	530.509	294.866
789.931	317.194	113.946	116.116	195.49	436.95	442.99	367.049	126.004	486.195	199.117	381.632	132.237
608.322	672.59	116.299	381.659	520.454	907.264	763.216	1053.07	477.981	649.752	412.967	640.419	363.221
608.666	196.242	6.04184	68.1188	115.779	238.317	340.533	247.139	92.0611	242.844	168.644	226.111	100.31
607.995	361.832	4.82872	99.0617	180.472	407.921	616.474	450.844	162.791	492.348	300.029	396.519	175.955
911.481	897.486	123.168	304.7	520.168	1158.69	1533.72	1158.67	376.763	1256.34	728.306	931.429	517.134
911.984	875.595	49.5381	275.645	503.458	1182.68	1552.12	1114.45	327.138	1246.4	723.795	906.346	494.473
789.428	651.04	303.6	264.85	472.029	980.908	949.962	842.189	287.725	955.898	426.518	766.519	358.077
295.153	2236.27	810.588	4158.81	2367.33	3932.78	2510.45	4012.64	2786.25	971.878	2111.4	2176.78	3447.15
868.46	135.308	528.428	75.939	114.132	188.025	178.772	193.271	63.0142	207.077	109.155	141.001	93.4226
867.968	118.938	407.571	43.0671	84.5801	162.637	178.008	175.259	58.0911	191.749	107.465	129.809	74.0729
529.102	139.973	31.5556	130.637	122.713	92.965	231.082	357.316	194.941	106.387	175.767	168.458	226.855
688.382	1141.95	6339.17	414.74	559.77	1664.92	1444.23	1981.83	462.786	1368.28	524.583	1460.85	506.655
738.404	598.127	169.617	308.235	536.169	1053.11	918.349	893.988	332.506	974.539	424.014	762.07	323.995
739.402	473.949	464.743	302.192	317.437	640.752	441.724	565.705	235.995	456.289	231.749	341.594	242.058
687.882	1274.49	2.57216	383.646	612.745	1946.59	1749.77	2245.32	528.627	1635.79	584.889	1799.91	509.943
738.907	459.734	15.6892	173.526	373.903	867.61	764.963	721.878	233.591	783.481	326.292	621.135	215.545
688.886	479.419	10.2827	153.607	221.929	739.942	618.26	836.835	194.216	582.802	203.764	632.786	174.718
498.83	248.518	214.024	105.677	355.907	905.225	852.587	254.65	148.592	502.632	74.9299	162.054	68.3279
202.212	420.609	43.7568	535.598	365.366	623.375	496.676	596.477	617.396	124.473	189.381	377.207	516.444
203.217	55.7053	38.7071	73.9666	49.5485	87.8423	61.2853	84.044	81.3571	19.1838	29.5674	51.7251	69.9744
402.032	160.318	0	128.693	74.3325	120.39	236.223	105.718	263.695	63.9397	235.192	251.361	129.256
418.008	163.361	8.00849	119.269	103.74	146.483	248.304	105.85	292.781	105.677	252.548	260.877	138.168
361.008	113.125	0	88.6039	57.54	79.0283	172.884	84.552	206.647	53.2914	164.732	177.123	90.6132
956.507	187.06	103.91	127.754	174.992	204.899	132.809	329.828	170.339	221.244	155.672	208.412	171.325
691.854	173.544	46.104	98.4863	138.006	411.513	417.303	165.582	142.704	32.6497	85.0577	164.224	60.3014
505.102	154.041	54.5566	115.146	111.293	85.7988	128.914	376.271	191.958	186.294	158.419	183.62	207.93
530.83	2187.68	165.187	1238.48	2863.51	6488.95	6528.8	3239.2	1864.9	5081.57	830.32	1569.97	559.159
692.362	175.084	1130.95	154.393	189.674	388.795	398.107	257.264	154.787	44.8392	89.8269	159.078	115.876
264.114	172.653	267.437	247.628	214.211	213.291	261.717	230.276	232.908	182.313	160.893	209.043	125.217
531.328	1466.25	1101.61	1006.42	1888.79	4133.65	4044.63	2192.68	1315.7	3093.54	594.369	1049.48	543.371
531.832	469.861	151.513	269.763	620.208	1360.63	1349.79	711.57	402.52	1070.03	175.242	329.946	111.447
537.789	71.7165	160.988	41.9323	36.5995	89.014	80.0077	67.088	36.8252	80.4035	49.8851	73.8503	38.4214
536.304	1067.48	1553.62	831.395	564.145	1847.92	1841.82	1342.56	1131.21	1393.32	1028.72	1334.63	818.052
263.106	790.904	825.882	1243.21	1144.74	863.352	1415.7	1074.58	1107.04	888.629	832.712	985.783	627.192
536.797	580.418	127.12	206.527	200.146	764.055	874.702	570.424	300.173	782.504	436.949	654.193	339.099
435.13	677.811	510.247	382.281	319.462	299.617	2069.81	582.219	1600.36	198.076	152.474	826.306	292.548
697.826	87.4463	17.8096	30.4177	43.4894	94.066	77.0754	56.758	44.3578	32.9485	55.8389	91.7372	47.3528
436.13	182.677	108.08	118.575	102.72	98.6981	505.388	164.136	405.571	72.8423	71.6209	227.168	89.2033
478.747	98.7899	272.937	100.865	138.259	157.365	129.587	154.851	133.567	137.545	99.5092	137.692	76.0728
163.075	460.262	137.365	519.507	542.454	541.039	528.588	495.037	528.982	515.242	522.034	524.14	437.954
955.493	126.558	123.852	172.245	205.889	217.841	151.715	266.157	175.568	209.186	112.735	155.464	118.68
392.243	415.629	144.976	998.887	225.563	516.954	384.926	838.252	780.78	151.51	281.913	202.41	836.901
198.147	396.159	121.335	482.475	602.858	488.71	587.799	652.636	501.701	611.746	580.948	637.301	452.468
170.154	15.4044	9.5603	21.4486	22.5144	18.1318	25.2249	28.5754	22.8688	21.6963	23.5599	23.2583	20.9724
892.729	83.8109	19.7067	100.498	113.546	98.0888	102.354	205.789	254.015	308.568	157.374	135.852	66.5629
155.106	1156.03	438.369	1477.55	1441.91	1422.34	1470.09	1446.72	1397.13	1186.37	1357.83	1306.05	1234.77
126.549	18.8092	13.1668	12.5675	19.5726	16.033	28.9445	9.35316	15.6794	25.0341	25.8507	21.8499	11.6937
359.205	1134.08	633.005	2570.31	931.004	1525.13	681.289	2414.16	1662.58	466.08	618.705	923.55	1907.87
336.254	75.8553	8.00527	215.095	67.6561	107.477	63.4134	218.447	128.375	35.0026	85.446	47.402	156.149
376.235	450.959	116.831	769.913	613.011	687.276	433.031	776.13	570.063	238.958	307.239	810.203	741.677
844.726	262.656	21.2226	173.23	302.342	184.919	262.056	359.173	219.559	325.068	255.286	314.925	160.627
844.394	228.314	678.967	202.527	260.137	196.677	224.267	377.064	191.356	248.586	216.404	263.893	186.714
419.26	256.574	117.139	516.611	1916.21	458.692	305.712	243.297	333.531	206.19	323.569	3390.73	270.917
89.059	127.27	39.9961	144.545	157.089	149.476	152.136	151.704	149.341	124.034	151.607	140.336	124.811
382.193	545.411	189.24	874.607	498.233	786.753	572.555	872.274	689.421	285.322	413.456	327.373	741.456
71.0493	103.944	36.6661	115.599	123.728	118.888	124.315	118.645	120.403	101.917	121.004	115.581	108.198
845.06	187.715	817.7	134.758	272.014	147.215	189.003	281.834	163.487	238.503	177.879	219.53	134.571
381.189	2375.35	335.533	3957.29	2625.04	3454.04	2425.52	4126.97	3077.43	1480.49	2025.85	1525.7	3320.73
305.137	567.461	63.7758	874.719	2447.47	1209.27	754.254	1000.2	730.33	527.248	610.619	523.195	644.081
242.176	185.955	41.7507	238.551	245.627	248.247	227.138	282.606	231.073	219.026	239.091	256.942	218.158
644.351	229.867	84.4066	497.373	371.385	339.365	129.015	418.521	550.354	492.562	802.08	374.934	555.512
644.027	132.374	4.92515	279.853	237.389	83.5723	47.5371	194.912	243.711	369.943	719.863	288.041	349.243
448.213	412.94	132.873	419.649	585.657	736.237	159.023	814.49	526.116	265.096	146.091	415.433	300.824
645.027	44.5014	22.0714	63.358	69.705	35.2845	24.0638	66.9673	133.834	158.182	176.868	92.4205	90.6005
644.695	75.9749	8.61627	174.79	237.656	56.6798	38.473	193.827	273.349	288.406	409.776	186.189	213.306
471.737	85.7901	11.5828	87.7739	107.662	145.393	115.622	106.263	79.2756	117.577	63.0573	96.6886	63.241
351.017	53.0767	6.35442	130.791	47.0536	64.7535	384.524	447.747	575.78	137.696	161.973	86.8192	90.8378
302.044	47.9703	5.04393	67.8993	32.6926	48.7897	54.6759	53.4223	35.2157	40.05	65.4247	33.977	53.7046
220.156	25.1854	6.45764	38.9514	20.9302	24.7288	29.4782	29.5943	33.6527	15.5966	36.3494	31.2003	32.4118
595.207	594.017	235.768	546.425	459.439	420.312	496.057	1390.06	1360.4	888.494	1540.3	1981.29	1229.05
597.216	87.9728	5.90601	141.602	107.336	98.4498	86.2147	200.205	159.616	135.891	169.848	208.96	182.641
184.115	56.7625	27.5313	244.816	288.602	325.301	425.692	365.671	361.052	52.9351	271.897	154.852	104.237
596.214	204.424	22.4134	208.551	185.139	202.12	168.256	413.596	436.862	322.68	517.125	690.857	394.214
141.554	24.2209	35.1094	24.0026	26.565	24.5648	39.9356	19.2689	30.7886	22.4837	38.4206	32.2855	21.724
225.105	1000.99	153.073	1714.23	1175.38	1150.31	1356.09	1443.91	1428.96	767.926	1175.05	1045.23	1342.58
324.15	507.743	193.018	1108.38	359.342	759.004	546.214	976.997	823.798	222.24	345.669	253.595	921.03
254.14	212.587	78.0238	357.045	199.236	202.638	153.149	404.96	287.713	140.922	190.898	256.079	251.207
323.147	2654.26	47.1625	5912.8	1955.36	4101.4	2983.66	5452.38	4490.02	1317.03	2037.99	1345.52	5072.91
253.143	1183.13	291.645	1808.49	1080.46	1127.47	649.406	1822.37	1611.62	701.823	888.331	1372.1	1379.04
185.117	1023.74	542.009	1772.76	1344.38	1157.34	1214.91	1657.76	1472.83	728.406	1189.08	1207.2	1478.88
301.165	1176.98	720.464	3740.65	844.871	1914.04	1021.86	3009.14	2302.94	401.821	770.554	537.545	3180.61
387.202	807.578	349.398	2516.83	829.162	1235.53	759.918	2332.99	1485.28	332.833	638.91	734.713	2580.63
184.169	15.5818	6.52325	22.1145	38.5741	29.641	32.0912	36.8038	46.9049	28.7706	37.8674	56.4607	25.4553
466.277	149.721	339.61	403.441	214.197	324.645	330.901	385.63	277.814	131.091	141.378	147.051	320.564
465.772	91.2111	52.7363	93.9786	134.978	342.798	342.782	199.472	111.504	123.425	66.443	100.399	50.3598
117.542	11.3643	49.4529	3.78266	20.0669	17.6231	6.38754	5.80694	10.1741	10.4657	3.6283	13.9268	3.34099
833.09	143.691	29.7086	85.4382	94.3525	131.638	62.1999	194.953	154.244	117.714	100.11	160.782	72.7955
265.045	29.4374	0.778513	58.5981	39.7819	45.0143	58.5111	55.4981	64.3197	34.599	54.9664	31.5271	69.3746
123.08	647.944	494.909	1826.47	1149.3	1327.95	902.961	1551.63	1380.91	707.04	1289.02	540.732	1545.19
813.228	157.954	30.5972	68.1334	209.212	213.999	42.866	90.5602	114.765	53.7658	46.7893	148.786	47.1631
775.489	70.1825	14332.1	87.7035	185.918	127.604	525.37	107.222	146.008	263.885	131.557	75.0588	77.7185
930.481	330.938	241.447	292.587	805.448	503.146	2211.96	360.774	594.301	1223.96	647.865	252.438	269.749
845.985	179.798	29.6335	174.188	473.556	284.686	1477.93	207.689	326.811	705.414	358.248	134.993	152.507
971.814	442.996	30.2519	204.367	303.716	420.032	332.393	247.556	273.012	284.996	336.448	267.572	214.221
845.833	221.407	37.2115	241.217	628.929	348.184	1822.94	254.669	408.5	921.806	452.049	191.898	208.826
930.173	322.031	44.8002	287.817	825.422	519.758	2003.56	359.395	617.292	1194.85	685.859	264.424	273.264
930.684	172.477	10.1199	152.473	406.287	232.834	1228.17	175.715	296.01	654.78	331.726	135.474	131.009
845.7	194.603	9.64045	172.42	557.75	308.946	1389.88	219.542	357.598	683.854	392.451	160.544	159.808
288.215	119.76	374.617	309.269	250.289	175.644	371.675	198.325	864.63	390.816	2393.92	321.498	832.528
190.086	786.979	741.581	1231.32	1561.97	1059.25	1939.52	1779.09	2460.55	2526.58	5862.57	2632.72	3074.52
130.064	177.946	180.705	322.076	378.26	248.144	484.387	455.644	617.028	576.659	1419.2	631.202	745.416
246.021	22.473	2.22171	27.1861	21.4591	13.2456	43.6573	16.1303	63.0926	14.5315	102.333	62.3938	36.2799
390.255	79.2287	104.709	256.11	253.501	138.204	185.503	201.478	246.554	100.775	228.778	595.811	233.514
389.252	327.331	376.733	807.136	1143.42	542.649	782.785	569.29	850.477	460.931	827.184	2608.97	765.935
844.191	123.453	6.82993	112.035	142.284	149.456	298.652	100.188	112.612	190.646	240.019	144.86	125.216
367.269	168.047	1056.63	271.349	575.689	259.994	396.229	217.739	345.814	258.945	366.259	1177.74	309.614
137.062	474.865	526.433	828.59	724.453	786.942	971.032	707.205	968.675	533.421	968.286	919.886	751.54
105.081	238.561	124.081	291.007	226.64	199.069	359.187	270.619	492.01	153.088	514.624	396.741	337.156
873.128	204.578	238.413	122.258	193.125	167.587	550.094	112.669	150.264	258.444	260.718	160.343	109.453
873.335	616.712	388.727	367.831	583.967	553.094	1702.44	322.949	553.512	825.247	862.453	474.494	308.981
970.595	3343.75	13.1045	2024.96	3435.46	2948.37	9962.71	1767.6	2821.76	4456.76	4815.35	2408.06	1870.97
970.818	2101.36	2.9107	1193.47	2119.62	1856.51	5998.55	1034.23	1774.99	2799.66	2993.6	1537.37	1149.25
873.842	414.769	214.146	235.274	407.175	323.05	1182.1	199.027	373.377	566.433	572.386	323.117	218.738
874.04	172.928	59.4109	109.447	174.87	137.436	461.626	95.0221	159.203	261.389	230.561	137.406	96.5097
970.454	3849.69	49.4737	2324.92	3832.9	3456.54	11324.1	2091.96	3307.48	4976.43	5396.71	2722.08	2198
970.26	2275.81	0	1442.93	2523.37	2127.68	5862.55	1456.28	1960.77	56.6363	3204.12	1576.99	1387.03
970.036	1047.48	42.937	623.499	893.124	836.433	2449.95	636.94	910.025	1269.87	1208.77	776.983	616.229
873.64	760.509	11.0435	424.071	706.416	617.052	2083.98	350.604	637.662	968.3	1019.74	544.945	352.441
971.041	878.839	36.4104	527.698	871.901	740.951	2563.91	457.437	702.605	1242.46	1288.47	690.296	486.928
80.0487	23.4298	29.8495	28.0892	32.642	28.8398	26.0301	25.9257	27.7762	20.5426	30.2467	26.7831	20.9277
161.154	98.1177	100.501	130.397	168.134	131.402	166.68	112.886	121.409	96.3615	189.073	134.288	98.8916
69.0702	114.38	80.2758	144.942	164.567	147.006	163.3	151.055	146.137	113.68	164.605	145.158	108.43
162.171	14.6107	13.6746	17.2737	20.6011	15.1091	23.9229	15.4788	15.8266	13.7073	22.8616	14.1646	12.271
201.167	40.8259	20.1727	49.9449	64.8843	73.2692	97.3911	56.0285	52.3785	45.0553	73.7409	59.8203	37.3359
200.164	239.332	65.9763	318.536	403.914	418.558	504.983	310.046	359.921	295.171	473.238	391.581	251.37
248.168	73.1946	63.1069	245.447	76.6629	48.4859	124.689	125.916	322.67	550.839	292.786	358.108	176.685
948.593	323.925	79.5308	191.592	354.09	228.137	512.248	181.514	298.666	470.215	555.497	274.458	196.113
968.56	1491.97	143.769	928.945	1766.86	1757.39	3331.46	1586.35	1743.19	3173.64	1619.27	1157.5	741.38
968.36	957.813	5.77929	669.435	1158.39	1193.88	2305.92	1215.63	1179.34	2077.66	1016.02	834.102	505.64
968.705	1387.35	22.3682	859.826	1575.16	1380.98	3098.46	1461.76	1598.66	2885.35	1479.37	1015.06	672.002
968.928	817.22	44.7401	484.904	946.436	859.751	1832.25	869.997	947.398	1700.77	829.886	590.066	386.319
230.175	404.5	514.46	421.546	461.322	631.277	690.415	694.083	439.103	481.509	553.463	630.099	405.642
212.164	343.098	481.882	369.514	383.879	555.387	590.245	610.764	384.162	399.601	479.17	571.357	350.564
570.342	15305.5	5317.45	7897.27	9075.83	27062.8	1789.08	14331	8946.49	2820.35	1854.48	11858.7	5745.37
572.347	853.536	497.4	466.201	531.71	1755.41	131.022	809.352	590.982	214.208	98.2004	690.611	321.024
571.345	4203.94	1719.71	2209.77	2523.87	7789.45	514.116	3906.49	2634.08	940.705	578.582	3234.21	1562.26
215.128	706.886	1026.51	1069.66	262.646	948.932	404.68	814.488	553.383	166.458	343.949	322.998	1018.88
621.068	191.485	260.733	175.693	144.171	118.575	164.884	255.313	337.847	336.129	270.478	276.015	137.976
828.422	1773.65	81.3627	1601.98	1363.02	1374.58	1654.79	2397.53	3127.1	3186.17	2408.98	2354.64	1367.67
835.743	131.893	3.98549	72.7029	19.0111	50.2486	18.9881	80.8107	176.467	339.027	77.2414	253.264	50.9339
835.415	248.855	118.155	191.376	211.483	203.317	254.657	258.188	366.895	448.031	356.432	403.328	167.315
829.425	219.04	151.72	231.364	158.721	181.243	183.763	307.81	350.962	314.791	274.191	269.732	201.588
621.817	117.659	173.683	112.044	86.0252	80.3951	93.668	154.22	185.418	201.055	135.422	154.661	90.4674
621.568	186.091	279.016	169.131	141.855	129.786	175.75	257.734	320.624	334.945	255.434	265.026	137.283
829.09	490.101	333.135	408.805	340.616	325.244	422.718	612.897	816.645	812.053	630.107	601.362	332.646
828.088	2335.35	1949.65	2102.06	1804.68	1787.8	2264.37	3153.09	4179.05	4349.18	3209.85	3028.82	1691.02
827.754	1950.58	1424.04	1671.69	1450.25	1429.07	1853.62	2622.04	3384.95	35.1043	2674.2	2671.13	1371.78
828.757	993.773	725.99	917.196	746.529	732.696	905.637	1362.94	1781.3	31.3794	1368.53	1351.49	726.478
868.197	83.5149	180.462	78.1984	62.3569	42.0773	47.7906	131.69	84.2711	115.868	113.509	97.2194	90.9443
867.937	148.599	276.518	144.491	132.304	102.729	89.1156	292.182	191.94	245.506	247.645	191.748	194.651
867.438	396.004	367.033	450.324	354.876	272.271	226.28	734.134	515.908	581.425	644.42	485.951	565.128
867.188	372.088	95.2458	347.212	331.428	245.081	229.342	651.006	436.709	544.563	618.723	474.246	471.713
867.688	261.892	1.35133	257.633	213.819	164.343	153.106	471.309	325.791	408.238	434.33	347.337	350.542
866.936	205.741	298.533	199.845	165.631	138.618	114.114	366.013	241.732	312.789	328.551	240.01	246.707
902.119	297.669	57.852	153.542	113.181	413.719	88.7559	271.413	189.404	218.055	93.8639	319.317	242.89
320.259	153.508	261.524	567.639	136.482	196.395	117.341	526.609	318.423	118.136	219.281	120.124	393.468
363.214	459.557	657.548	1250.92	1524.12	637.194	732.676	2865.27	2252.2	4520.09	643.039	1461.8	1074.76
321.261	44.4821	82.9782	140.717	30.9339	50.3148	36.6779	123.865	82.6174	35.8173	67.6649	27.4551	102.213
912.966	415.994	10.3595	332.381	375.374	282.452	217.93	402.732	371.105	397.202	448.031	475.988	388.974
913.469	925.502	52.5044	773.637	764.922	620.515	459.259	905.306	845.025	827.301	965.079	969.023	852.104
913.217	824.798	4.14427	643.971	659.786	534.729	427.774	747.23	721.578	821.316	896.159	905.706	703.647
913.978	420.674	16.5849	323.071	346.216	275.905	219.377	357.14	364.74	424.725	436.423	501.035	357.105
914.224	188.907	0	151.675	167.231	147.017	106.997	180.239	159.022	186.763	200.042	213.787	171.762
289.142	1138.86	328.334	2006	1543.16	1608.92	931.091	1750.54	1506.59	1331.92	1670.65	1036.07	1638.33
913.72	668.859	72.1944	512.278	538.274	440.5	351.42	623.085	584.294	637.583	702.254	745.223	596.394
267.16	1443.54	2192.72	3443.82	2005.81	2337.4	1124.52	3015.18	2294.92	1272.14	1896.42	874.193	2758.94
268.163	286.689	400.398	623.602	375.975	457.147	216.033	544.135	448.947	223.729	356.401	218.034	516.204
215.535	11.5262	21.4948	15.1475	10.0274	14.2268	11.2946	13.0238	10.0743	19.3683	17.8564	13.1432	17.7955
216.196	906.741	1220.82	1714.37	1324.97	1432.13	1184.74	1475.52	1228.93	1456.39	1989.48	1424.86	1843.87
290.144	225.008	124.98	387.249	288.55	289.856	217.086	332.088	310.545	262.187	324.378	214.223	306.878
217.194	138.572	224.984	258.437	178.384	196.211	159.257	218.513	182.37	211.358	275.59	204.513	262.606
239.164	685.953	860.675	1560.38	864.348	940.895	551.961	1253.57	1076.09	717.905	877.634	521.365	1274.71
279.158	833.171	352.681	1400.97	1083.8	1048.54	642.252	1153.49	1119.06	1018.14	1109.29	800.153	1169.38
221.153	177.744	248.013	372.634	246.031	261.416	144.02	338.737	264.089	206.638	234.228	143.104	344.44
299.186	866.731	1368.94	2228.25	902.472	1176.18	646.616	1895.72	1322.83	847.633	1037.71	651.705	1930.15
402.279	220.583	740.295	343.453	284.213	256.353	364.947	553.406	518.564	306.919	282.079	527.047	311.118
893.66	104.914	9.56052	74.5447	68.1493	119.471	91.0959	74.5768	90.2964	88.7592	83.5019	123.923	84.8002
673.591	97.8689	3.55705	81.9212	68.5094	126.272	108.569	95.7399	90.0403	97.266	94.1005	129.838	104.168
682.086	94.289	0	47.5413	70.4278	107.373	126.184	44.5813	69.2051	112.463	103.973	110.659	72.122
686.088	100.242	0	52.374	69.8022	119.156	111.536	35.531	77.163	119.857	100.428	118.458	54.709
685.819	88.2265	4.7869	54.2566	71.4236	104.823	130.234	44.4279	78.494	109.465	78.2443	98.1693	47.46
904.449	294.53	241.154	164.381	211.849	351.331	373.982	178.713	233.945	320.875	290.764	389.289	190.148
903.446	446.69	153.127	252.353	336.347	483.821	586.659	229.339	362.493	467.493	459.061	542.038	299.738
898.123	201.227	5.47675	140.652	118.634	232.997	184.276	143.735	152.953	171.552	162.948	225.928	199.056
672.841	934.824	20.1479	733.971	635.415	1216.33	983.017	740.178	874.261	899.785	928.24	1067.96	985.617
897.79	565.31	4.10697	408.078	339.536	608.664	517.48	379.89	468.382	475.276	469.306	583.078	536.919
903.781	546.202	5.49437	247.784	375.968	671.485	751.207	293.217	435.873	637.505	567.758	689.887	334.81
673.344	402.633	147.016	484.895	364.008	538.66	332.617	390.587	406.828	306.613	354.944	405.215	502.422
672.34	968.14	81.7473	799.005	721.064	1247.34	927.413	836.881	906.828	860.585	876.966	1030.93	1050.15
673.094	536.892	130.001	434.403	358.664	659.707	538.91	402.789	535.57	506.753	484.06	581.038	560.21
896.119	4658.25	783.93	3427.18	2848.06	5473.77	4613.16	3327.28	4090.28	4050.63	3963.44	4793.58	4519.82
672.591	1177.26	303.715	946.012	778.414	1449.81	1203.89	914.64	1144.63	1121.86	1100.77	1330.38	1208.47
897.455	1467.71	48.5913	1115.26	941.405	1683.52	1379.69	1060.5	1320.94	1188.41	1259.51	1428.99	1406.52
904.786	122.138	4.12313	63.1089	84.4887	139.914	162.572	50.5123	99.7344	149.404	123.222	171.804	78.2039
904.114	426.024	49.455	195.884	306.589	496.936	628.436	214.464	349.295	527.539	463.929	581.609	260.261
896.454	5828.19	1316.1	4441.35	3879.24	6800.02	6220.89	4390.28	5374.56	5141.27	5215.49	6162.51	5874.06
896.788	4777.93	915.835	3458.21	3158.98	5661.38	5116.6	3424.41	4371.84	4021.55	4201.77	4942.54	4770.74
897.121	2861.48	577.606	2118.26	1831.54	3345.5	2900.63	2097.14	2675.61	2462.1	2510.78	2983.44	2845.83
673.84	52.0876	1.18621	46.96	47.4659	71.1246	38.9059	44.7023	50.3791	42.5533	37.712	54.0666	58.5766
321.168	1007.53	339.235	1632.69	1186.04	1325.65	768.598	1494.04	1378.39	963.175	1310.79	848.986	1405.09
157.121	1848.03	355.976	1220.46	3193.85	3178.31	482.16	2441.89	2029.01	1197.32	499.82	1829.3	860.464
568.325	2696.65	1327.75	2651.87	2074.04	6180.46	402.635	3754.83	3029.53	467.378	548.562	2866.48	1583.11
118.551	14.3494	3.47941	7.5853	23.2349	19.274	3.33599	15.842	17.5367	13.4499	6.07837	17.4277	6.76631
275.661	87.7007	54.9647	62.1082	60.6217	194.363	11.7889	93.5597	87.3261	16.3834	18.7359	86.4658	47.2531
139.111	589.768	225.089	380.391	671.816	690.491	231.832	601.385	505.347	424.923	244.486	471.72	316.096
243.159	414.753	518.835	931.486	359.125	496.4	275.943	801.122	587.574	277.194	430.914	267.136	836.899
322.178	365.831	152.49	572.25	305.34	465.346	231.419	439.795	462.832	260.799	340.044	254.967	524.734
327.143	803.158	165.149	1083.19	272.654	895.726	481.859	865.104	932.491	287.558	381.391	239.842	1061.01
265.142	754.049	176.876	1110.42	680.503	823.829	466.621	1146.97	1009.69	507.735	687.795	545.642	1054.01
595.345	648.948	202.78	599.484	743.431	1092.81	182.217	1326.3	826.478	380.405	237.092	742.174	491.56
447.293	1224.53	932.973	1380.58	2557.31	1482.04	1177.53	1203.19	1422.65	1333.82	1451.53	3920.43	1238.27
448.293	332.164	1107.84	416.164	641.123	406.943	308.845	374.182	395.546	377.184	431.74	1015.42	410.075
594.342	1520.78	358.898	1029.83	1452.57	2479.07	313.885	2752.88	1967.22	883.113	384.243	1398.8	692.9
425.307	440.429	1196.25	643.054	974.38	516.728	496.291	457.063	494.031	490.538	549.301	1669.67	492.426
359.26	191.483	316.093	232.028	185.675	195.385	459.328	403.739	753.421	671.862	300.035	361.794	124.007
358.259	453.886	1195.01	598.263	365.872	368.53	635.606	549.481	991.429	983.765	637.28	946.882	611.26
288.957	66.9124	108.9	147.556	70.1393	95.1196	54.3072	126.111	112.56	42.6502	68.713	55.8857	144.598
284.962	189.55	287.701	446.058	187.278	282.014	172.594	367.096	336.502	130.565	205.555	161.914	416.923
308.938	28.4437	3.21298	46.7901	29.3202	36.4003	30.9297	41.1924	40.4361	24.7131	34.471	25.6926	42.986
306.941	31.0571	1.60149	46.4038	26.8495	37.6133	28.2284	41.2441	46.6596	24.4069	36.6983	28.5046	49.8345
286.959	178.193	230.826	444.469	181.742	280.456	163.37	367.985	336.037	122.254	201.751	159.571	415.578
373.219	641.411	555.687	872.724	860.318	744.738	600.036	691.025	841.559	547.232	548.624	921.957	922.61
173.153	28.2307	6.98029	37.8632	39.63	56.6024	39.6942	43.4698	44.1828	38.8882	46.8721	42.8028	38.3938
513.363	127.501	327.19	76.1587	966.385	171.631	104.251	42.1249	67.4326	80.3402	120.969	2060.07	43.7589
486.366	64.3161	102.331	63.6519	441.465	89.4079	51.6123	55.3764	50.7711	61.8443	85.7092	909.282	56.4616
579.369	358.317	277.017	288.399	1891.71	526.348	270.716	157.71	319.4	255.26	322.114	3899.74	187.115
334.274	74.4423	109.013	192.118	72.4616	80.8653	60.5769	193.542	130.982	58.0578	103.45	61.4258	180.475
265.179	367.798	350.019	637.522	466.737	581.11	449.551	601.149	579.344	431.003	506.977	315.856	515.991
189.163	53.5215	111.031	113.484	71.5051	83.6661	56.028	127.954	98.5776	47.1322	65.589	50.0554	97.4185
185.153	233.124	277.94	322.657	199.471	255.201	239.868	336.115	372.826	237.451	343.027	293.643	337.78
574.415	206.909	296.407	118.791	427.266	136.743	112.843	182.051	119.999	162.16	142.83	917.51	151.233
530.369	94.4077	483.795	117.307	277.669	115.701	68.9658	152.009	104.182	68.282	92.5676	664.483	135.757
487.353	1066.67	631.897	906.299	1033.56	889.978	1281.14	1441.33	940.36	1332.21	1463.84	1403.58	1166.71
190.161	26.031	17.366	29.4107	27.2378	35.022	31.1452	44.6435	20.3442	31.1716	41.9589	29.8496	28.6746
244.439	17.5799	23.8353	14.6287	17.1569	21.9295	21.6026	28.8152	14.1722	23.9314	18.0641	17.872	15.5044
266.173	1093.75	130.75	674.299	1124.14	995.163	1743.21	948.369	918.943	1560.8	1546.48	1512.19	695.97
245.193	1466.03	952.796	1378.15	1644.54	1455.01	1777.88	1929.91	1449.03	1703.34	1953.28	1894.24	1561.49
227.181	1304.37	819.408	1252.99	1353.75	1223.13	1548.85	1868.28	1260.48	1513.36	1714.15	1548.92	1395.8
208.169	187.295	134.332	184.211	195.513	206.024	226.348	271.973	198.632	219.94	280.124	234.512	208.657
510.357	163.955	72.9473	85.8914	217.653	204.711	450.533	248.131	215.068	293.996	269.543	259.126	121.693
226.181	7402.32	4294.6	6966.2	8329.03	7256.24	9309.18	10083.3	7562.21	8853.26	10111.6	9530.48	7634.87
180.174	185.847	118.089	198.441	211.722	178.445	237.404	288.429	200.637	232.027	279.339	243.292	201.76
225.49	69.7038	47.2869	73.5515	75.9465	64.1344	95.7021	92.3983	82.5353	80.7501	91.5091	86.1999	70.6722
243.44	79.7412	74.0008	82.8875	93.3666	87.8704	109.989	128.016	81.3699	104.392	119.946	118.803	95.2766
528.36	111.965	216.498	213.006	115.894	119.219	94.7675	215.482	127.714	51.579	89.3493	134.103	251.158
244.191	9703	5819.11	8861.06	10501.5	9031.55	11710.3	12741.1	9165.23	11365.9	12624.5	12353.6	9955.09
529.365	69.2556	173.342	102.127	170.887	87.2619	39.781	233.414	72.1742	42.1092	61.6912	408.586	93.3498
198.178	255.842	121.092	259.603	267.905	253.687	300.653	369.825	273.313	299.016	308.159	316.863	269.752
586.384	100.92	287.481	178.418	111.332	116.22	86.5728	213.824	161.042	119.625	117.555	101.552	206.013
330.136	92.1058	45.503	75.1647	98.854	91.0113	149.068	190.49	166.212	179.571	119.501	133.422	119.265
572.377	119.41	325.671	145.808	153.397	146.227	94.5519	196.799	131.904	104.196	91.4279	221.194	179.279
457.364	66.2017	39.0454	72.1908	77.0915	60.5981	106.887	113.203	82.811	129.467	81.423	109.23	65.8227
596.357	1125.71	571.471	901.145	1022.92	2802.52	575.445	2145.25	1326.64	1020.09	468.667	895.845	518.101
213.529	27.6285	19.1738	35.5269	39.4269	45.4721	54.9003	38.4417	47.0372	52.8726	36.5895	44.3811	35.7548
236.162	322.849	74.3687	240.659	411.563	391.884	674.389	278.877	352.044	573.73	467.706	484.02	217.347
347.212	608.274	3084.57	512.255	598.569	515.188	575.056	1042.36	811.849	1680.15	592.361	993.528	939.791
214.18	3241.74	1711.26	3607.1	4488.52	4073.27	5369.63	4154.59	4340.04	4646.81	4457.8	4325.1	3684.18
361.202	440.99	340.541	722.796	303.895	296.5	260.329	1310.71	1021.02	2110.8	370.802	603.077	696.303
215.18	601.29	416.274	777.423	700.3	677.949	814.36	838.257	733.031	732.025	742.577	655.335	810.748
317.163	1456.27	401.146	1562.74	1567.96	1664.64	2031.27	1703.43	1842.79	1873.61	1792.22	1641.98	1529.65
315.164	3899.55	2674.7	3931.15	4216.54	4422.24	5484.22	4484.18	4871.86	4717.11	4794.54	4553.91	3991.6
433.243	299.597	371.68	402.772	1137.5	408.048	483.837	500.523	572.089	336.158	495.304	1679.56	467.364
197.153	797.577	680.925	1133.8	795.515	853.568	762.856	1301.26	918.753	632.044	816.557	566.468	1172.31
293.174	1037.41	647.83	1429.22	832.182	1015.56	952.081	1687.07	1103.65	740.397	1021.32	531.284	1412.62
271.19	918.06	1335.61	2092.3	615.363	956.111	632.93	2048.44	1169.35	531.252	749.496	389.277	1867.23
464.281	524.997	1521.57	575.143	464.666	393.351	319.771	427.546	383.593	169.551	332.019	608.462	386.757
318.279	99.5418	98.9005	197.255	201.461	118.414	121.08	167.672	161.044	119.22	195.459	299.662	190.766
500.318	947.79	3080.69	1064.44	1205.91	696.687	538.06	699.461	702.178	455.408	714.518	1667.98	650.081
169.158	88.3438	103.489	155.935	85.9263	87.1416	80.0712	170.068	101.66	63.448	86.1219	48.7129	160.263
237.184	225.315	424.834	402.53	219.351	267.426	241.315	419.897	304.66	204.613	268.943	281.105	362.138
152.153	15.5685	21.961	39.9845	16.6011	12.0832	11.9935	15.5339	24.3889	7.70189	17.2177	6.53594	31.5075
360.279	150.005	257.368	180.123	143.437	110.839	162.104	200.743	267.567	346.066	330.953	194.868	233.12
462.267	1071.09	4670.52	1313.64	800.915	670.431	429.806	618.537	666.131	305.706	643.044	1493.98	781.7
516.3	7132.32	46875.4	7930.46	5729.42	3820.9	2308.74	2525.49	3276.74	1170.83	4348.23	12193	3272.15
517.303	2577.71	14725.7	2989.59	2070.13	1535.01	899.521	1253.87	1297.59	516.841	1509.58	3914.49	1560.69
498.289	1784.73	10376.3	2041.62	1740.84	1044.82	751.971	948.238	929.527	363.48	1048.38	2786.08	963.845
518.302	1016.06	4823.57	1161.41	1008.45	692.697	591.684	722.097	638.2	227.257	692.128	1585.64	660.877
149.025	604.096	1270.86	995.328	911.461	867.127	641.011	633.958	1011.62	365.143	421.021	810.851	1115.51
150.025	50.2419	123.186	90.2489	86.177	82.4347	61.2899	61.8701	95.1676	32.4319	42.2799	75.285	100.685
333.207	1454.61	1202.27	2821.3	439.387	328.678	441.031	2302.97	2084.37	3731.29	2240.13	2683.26	2164.94
924.587	289.195	1008.2	142.069	76.6287	93.0435	102.354	113.953	114.86	202.419	79.651	378.462	238.535
384.275	272.194	475.161	146.46	138.491	126.225	247.719	250.954	429.465	635.498	183.643	239.008	163.967
373.273	1160.6	2714.34	734.553	402.286	1213.27	2417.67	806.486	1685.01	2109.15	550.234	1618.62	1084.16
519.312	768.162	1887.31	1036.58	1352.25	750.973	628.875	904.587	733.917	426.465	512.672	1809.62	882.87
483.354	532.352	1074.84	354.833	1151.62	417.932	580.863	506.08	431.178	129.992	555.834	1771.06	422.143
506.334	439.679	944.412	422.908	696.736	396.567	429.836	477.237	393.734	471.236	423.733	942.904	467.761
505.334	1365.13	2727.76	1341.07	2240.47	1270.65	1348.08	1341.68	1277.74	1577.96	1428.39	3159.25	1403.11
484.357	163.493	309.913	125.69	278.412	129.008	150.475	133.469	141.005	148.243	174.361	489.38	142.085
501.383	89.1241	88.2596	71.2139	132.548	75.2538	76.8086	54.2759	62.1632	101.764	105.107	180.161	78.5527
593.386	378.043	285.167	342.354	1618.53	351.129	198.668	125.531	200.118	212.21	233.138	3001.94	230.783
549.361	330.818	258.317	89.6244	1910.09	338.959	329.52	93.1716	180.998	211.792	282.268	3537.96	76.7587
199.168	346.916	322.191	464.012	324.755	364.555	342.933	460.835	392.176	323.14	413.495	332.732	453.033
181.158	166.489	171.728	231.771	132.873	148.121	138.491	220.97	307.759	137.394	172.384	144.012	213.659
332.294	138.145	143.348	371.759	122.597	139.397	114.428	321.182	201.829	111.804	161.396	79.2163	295.847
263.164	257.039	237.165	375.845	272.23	390.658	245.396	377.309	292.998	242.075	316.617	238.696	410.328
415.233	1101.89	1053.11	2232.09	490.778	1125.39	742.088	1649.01	1289.15	316.969	423.308	472.289	2273.19
431.266	598.85	808.563	590.131	544.625	652.283	649.74	611.344	687.654	537.679	433.887	794.628	663.84
298.204	214.95	452.56	450.372	261.987	349.801	501.079	781.53	425.081	457.838	344.548	261.768	426.518
315.264	170.047	99.0887	146.586	339.446	228.574	241.118	326.9	360.809	292.38	351.416	681.81	265.613
392.286	299.359	643.058	180.077	111.791	341.752	741.037	140.976	588.553	538.015	137.412	476.85	297.269
391.283	1136.78	2333.8	553.347	410.195	1229.11	2640.49	465.655	2007.11	1974.36	496.347	1631.19	836.11
316.267	77.8017	126.589	51.215	90.1595	74.8323	77.7586	98.1236	104.842	91.2713	99.4582	174.322	111.715
277.144	592.447	248.598	765.292	395.401	477.595	552.454	819.599	649.907	710.664	638.414	505.607	554.911
274.274	25.3655	11.1703	38.2472	30.7392	31.4986	27.5067	26.4293	32.1717	36.4967	31.3446	34.0015	36.9076
255.16	1737.33	1625.75	4281.37	1147.71	1582.13	1183.54	4133.41	1955.45	1389.98	1697.27	1134.18	2978.13
256.17	303.44	286.103	695.867	219.566	280.898	210.431	713.526	332.112	199.943	303.11	197.449	502.49
254.372	20.8472	23.4562	39.4734	11.4319	19.6308	13.9894	43.0352	27.515	18.7222	17.5267	16.5892	30.7108
441.267	541.064	609.397	829.308	394.222	587.662	383.803	650.061	556.379	317.651	364.484	330.412	823.944
251.166	841.583	750.225	1300.2	782.788	964.157	663.695	1259.5	971.837	678.777	845.103	475.451	1184.67
534.32	554.338	3811.7	1884.41	658.883	2143.33	2204.96	1989.83	3833.63	177.416	1809.63	1807.93	1689.99
213.177	455.176	203.071	335.267	228.605	221.711	194.776	293.592	265.436	244.11	257.8	517.768	305.378
272.187	600.798	642.134	641.936	396.128	417.17	388.644	1158.9	1495.91	937.339	602.548	764.791	593.673
176.152	20.9067	24.4389	28.9052	34.1534	18.4686	34.1185	35.5196	46.2136	12.3294	40.4387	42.4975	33.4781
478.365	54.9375	112.329	60.9143	49.746	62.6329	139.905	37.8991	52.5208	78.0722	110.572	53.8821	61.7254
477.37	75.5926	27.4264	49.999	124.164	92.8986	294.228	61.9837	117.703	196.123	211.497	122.483	63.9981
301.284	64.5767	35.8366	92.18	117.878	80.1972	185.834	70.4968	122.533	89.6282	238.736	181.911	121.486
302.284	22.0475	14.1297	27.5392	47.5923	27.5519	55.534	32.9482	42.2304	20.9495	47.2499	67.9208	43.3604
250.178	380.148	68.6991	267.542	517.308	479.936	976.996	275.686	522.142	632.857	752.324	552.963	268.372
228.196	9532.62	6423.99	11233.7	12238.5	11443.8	15530.1	11114	13852.1	13457.8	16029.7	13321.3	12434.8
229.198	1536.14	1060.59	1930.33	2003.06	1908.82	2498.92	1992.61	2236.41	2135.28	2597.86	2106.68	2058.04
211.169	740.465	579.46	1064.37	826.587	912.025	927.86	1037.71	984.16	813.958	1045.56	831.151	1088.46
193.158	346.703	259.601	456.665	381.902	390.476	474.708	413.719	456.912	424.086	505.897	407.023	485.41
227.495	86.7838	59.4839	111.637	125.071	104.36	145.882	110.601	135.013	147.492	125.537	125.294	110.486
228.497	18.9731	13.4251	24.8654	28.3229	29.191	30.9952	24.2832	40.2208	31.7356	36.5905	26.6763	20.5815
194.161	59.6519	44.9158	84.5965	71.5333	77.8057	87.7861	75.9742	92.972	73.9486	92.3986	64.95	98.0266
159.157	23.4505	35.5533	59.3728	72.0825	78.6943	91.5425	98.2718	89.4259	23.5915	80.0116	65.4329	28.7368
158.153	186.483	230.921	526.404	631.928	720.418	728.904	803.781	766.046	165.269	652.233	502.825	259.646
285.288	125.536	52.6029	126.228	248.393	125.559	239.741	86.1038	188.483	300.952	483.837	355.906	133.85
177.162	133.63	50.8649	82.7806	51.6188	107.031	52.6065	67.9564	67.4196	59.8364	50.3521	40.7832	64.7421
241.182	603.353	557.838	796.698	427.856	557.427	425.104	662.323	608.65	443.493	522.758	446.507	733.645
289.291	75.3325	44.5966	154.145	89.8143	73.4861	224.418	168.983	99.2809	230.065	344.217	126.888	143.901
288.289	394.548	210.585	746.867	452.352	357.753	1031.86	747.148	424.038	1038.67	1575.64	483.046	642.627
577.358	350.474	241.312	563.266	756.256	374.597	240.68	351.509	329.736	173.591	248.123	1131.31	557.34
245.267	71.0064	17.0122	106.257	68.7749	122.06	160.485	100.662	75.2786	116.976	228.494	55.1496	92.2297
407.279	362.603	845.016	279.315	155.526	802.025	879.406	321.884	645.093	768.559	153.306	393.202	232.196
244.263	351.029	156.241	557.49	374.678	581.145	916.79	510.416	346.128	526.272	1392.02	304.539	488.96
542.399	165.719	278.718	216.708	286.709	201.984	169.403	168.324	209.158	183.571	179.853	492.655	240.219
564.38	396.502	253.89	341.436	588.079	384.614	386.286	306.25	375.771	466.504	390.437	807.279	386.929
541.393	428.962	756.612	379.94	822.576	405.57	424.599	378.748	445.886	435.822	438.308	1391.8	436.096
563.376	1240.52	760.543	1014.7	1912.3	1139.46	1129.36	917.372	1148.42	1300.6	1089.33	2711.09	1147.26
286.278	146.371	62.3837	122.005	147.147	182.907	245.5	159.496	139.486	192.166	359.056	139.764	168.773
467.42	108.099	67.8565	95.4863	98.8	75.8051	65.9806	55.4898	78.4263	102.123	95.1856	108.817	63.5116
240.193	450.89	297.181	405.121	448.955	442.834	478.005	465.122	475.527	451.851	475.439	499.29	405.238
215.257	9.97758	10.9208	2.93194	37.2898	9.71782	70.7599	9.52061	24.0579	25.6044	17.7521	40.723	37.0322
223.1	535.356	545.41	812.577	991.382	1242.54	1217.35	2535.66	1557.13	533.165	1017.84	906.065	614.723
177.059	901.767	933.706	1266.09	1767.01	2268.86	2080.67	2033.94	2793.59	842.561	1596.76	1622.25	996.311
245.08	262.559	61.4594	224.902	472.603	606.865	765.341	384.372	668.63	233.041	467.279	345.673	189.803
176.515	9.77155	8.56409	17.0909	23.1628	21.4838	24.1457	21.3976	27.464	10.6246	21.3747	24.7277	11.0227
214.253	40.3231	61.4281	42.0467	202.225	65.161	389.901	47.5464	115.886	127.128	108.982	165.392	215.863
502.294	646.568	4980.11	261.315	1821.55	1101.9	1374.99	644.86	1523.1	97.6862	519.027	368.264	751.315
439.361	39.1108	58.7429	56.9446	60.2752	44.3624	66.8367	58.186	51.8276	61.4393	109.091	78.8045	76.9574
171.173	54.8562	49.9929	49.6716	53.6083	54.1744	59.925	42.1037	55.8195	47.944	68.0074	56.6748	57.3838
752.496	345.026	395.24	242.743	221.236	465.727	180.336	213.967	272.149	250.462	513.14	491.629	293.862
751.502	587.752	790.992	374.162	264.873	935.668	326.404	355.588	505.707	478.947	1049.78	727.46	586.134
705.564	478.072	355.692	329.235	279.168	474.847	239.922	241.241	351.313	465.34	588.767	599.041	424.644
773.491	405.561	118.089	290.457	278.876	584.264	398.335	299.075	437.95	458.409	658.251	289.55	351.296
753.5	217.902	221.941	178.596	635.972	271.225	153.853	144.661	173.543	200.201	240.417	1056.31	191.678
774.495	191.44	248.453	179.206	160.47	343.168	215.685	182.833	217.26	276.832	346.485	195.359	167.798
376.26	8323.66	8506.63	7293.68	5541.03	12280.6	6412.1	7218.26	8817.23	7599.14	13089.4	8935.62	8862.79
377.262	2216.14	2275.11	1949.62	1543.38	3212.63	1717.57	2038.62	2398.54	2128.34	3340.4	2318.35	2469.54
378.264	407.486	330.888	301.714	242.962	522.892	262.191	318.52	421.512	385.132	495.426	369.926	403.827
704.573	834.376	690.542	562.909	454.82	868.358	386.291	327.921	536.976	849.522	1085.66	995.605	775.174
398.243	931.534	210.076	670.255	775.783	1292.44	1167.68	763.533	996.953	1030.43	1487.04	860.188	672.459
393.284	588.703	400.926	665.378	506.397	862.936	648.961	651.853	751.49	607.514	1062.08	501.883	657.461
394.282	218.688	91.2781	198.59	168.199	271.351	183.652	210.987	223.792	213.882	294.917	214.208	236.189
660.47	94.7687	161.97	149.615	236.875	115.403	64.2632	99.1701	76.576	64.2614	87.7731	446.77	150.361
327.008	147.176	204.497	210.739	132.84	178.101	130.846	181.27	227.706	134.099	115.2	120.487	222.556
329.016	171.768	194.169	230.046	136.766	190.997	143.018	169.517	253.858	134.63	124.474	140.061	251.263
179.178	21.9021	31.4406	40.5088	27.7819	35.9547	40.4646	55.4051	36.5161	22.0513	24.7551	27.8795	49.0754
524.462	74.363	39.7903	48.3073	50.1781	33.2659	52.4883	26.6395	60.5384	38.8648	63.3346	69.6626	53.2822
523.459	155.267	86.073	120.879	112.762	105.782	125.331	70.2265	96.5515	111.621	142.388	187.013	103.289
225.184	386.342	261.839	454.606	245.389	269.944	264.541	355.637	301.032	191.495	321.5	267.35	484.136
340.357	19.0752	19.3882	52.3199	99.7685	51.472	153.966	26.4424	67.0096	44.6594	103.823	139.157	73.1802
616.461	233.622	250.232	186.622	299.086	198.88	206.776	159.82	214.839	309.733	209.291	501.865	245.515
622.418	292.642	236.722	232.03	408.461	280.246	299.672	298.17	291.554	359.01	269.469	573.401	324.039
621.419	845.282	596.135	713.159	1127.02	698.949	735.07	641.085	723.555	820.732	658.555	1524.81	737.444
453.371	71.1644	67.9547	69.8938	81.797	71.9035	104.712	71.1793	69.4707	45.3636	127.292	90.1601	79.6171
270.304	344.774	128.074	181.756	173.02	336.024	293.466	72.7498	164.605	459.686	306.551	166.095	190.307
369.262	554.911	913.605	1254.08	391.178	590.685	226.123	1057.75	489.411	175.997	366.408	364.358	1240.29
254.21	377.816	120.347	178.941	160.157	157.268	169.891	168.725	167.289	360.538	182.613	247.367	185.914
172.169	54.3112	46.011	82.3806	70.3658	79.0803	84.3504	80.1066	93.8157	32.8885	74.1759	79.1771	63.4626
617.181	471.448	253.479	529.646	1686.21	1660.47	3313.9	75.4206	1282.38	438.587	5745.28	275.341	808.005
494.325	151.122	216.587	1882.98	2201.83	2574.41	1764.04	1779.15	2230.63	131.877	3816.57	280.928	170.272
313.237	1255.62	1517.34	2389.82	766.714	1115.78	593.303	1968.83	1277.99	606.008	859.036	653.276	2328.13
616.177	1061.86	618.392	871.127	4162.49	4114.88	8361.5	502.281	3164.97	1231.89	13816.4	596.977	1947.13
618.184	130.846	74.9489	92.4141	380.484	380.666	815.955	17.4342	315.705	125.601	1313.76	69.6578	232.322
257.206	308.927	240.638	422.951	196.391	250.071	172.708	348.179	268.69	177.727	259.296	186.017	445.056
304.298	78.3371	49.1702	86.8328	107.336	84.4981	152.967	67.112	78.3555	113.899	338.907	126.594	100.19
679.459	491.717	443.507	404.645	537.139	353.04	379.755	402.676	389.098	493.751	355.109	929.79	494.362
674.503	213.704	212.506	159.132	194.338	160.417	115.71	142.683	116.804	200.954	157.719	346.257	205.351
430.388	140.676	49.325	39.6319	88.5585	62.5277	62.1856	415.658	58.9297	7.24507	61.7491	950.2	77.0013
680.457	238.088	164.409	161.33	226.289	193.392	148.254	188.249	187.848	210.872	162.097	379.199	249.455
219.175	107.628	90.5864	88.9619	81.1333	89.7574	76.7506	74.1888	95.5714	69.3992	61.4075	135.736	63.0163
272.294	60.3945	22.1896	56.9228	139.357	217.223	271.734	110.331	76.7176	56.1798	306.672	26.9537	76.2282
242.282	6.2021	25.8348	18.466	42.5326	44.9032	236.344	10.1829	27.2529	33.8453	38.2856	19.1799	49.6504
289.181	472.657	579.202	641.888	287.387	329.603	159.328	287.602	364.48	181.855	417.163	237.184	886.872
387.269	458.303	336.304	324.599	274.577	308.459	237.553	352.969	293.726	434.446	278.114	260.767	458.457
432.886	39.6332	92.7135	61.7199	117.678	54.4002	37.5828	14.5703	61.6506	11.2137	21.5961	207.602	73.7054
256.263	147.012	78.4565	43.6724	138.629	65.048	59.9212	48.0045	97.0343	62.2662	34.5426	59.9171	86.2134
520.341	70.5657	539.035	20833.3	2951.47	25596.6	32974.1	16955.8	49821.9	35.3864	25794.1	10571.6	91.1814
715.524	103.788	211.02	87.3242	129.685	78.5698	77.2432	74.411	107.619	87.7341	100.345	246.768	90.2489
737.501	193.464	177.529	179.541	205.239	137.829	138.373	139.338	132.197	199.737	136.855	317.88	192.606
331.285	335.484	229.218	205.653	412.088	233.584	194.367	180.826	239.245	218.069	244.398	329.579	325.121
282.278	540.454	311.264	139.509	229.483	181.693	200.188	143.578	229.033	134.996	171.195	239.034	383.722
280.264	35.8455	26.4731	19.4231	30.4831	23.4845	45.6585	312.181	18.9207	13.8231	22.6207	448.349	41.1505
587.483	182.191	195.234	179.34	229.281	193.283	222.393	173.351	196.582	99.1065	176.561	152.299	186.175
326.379	37.4155	38.5436	37.1419	86.849	106.265	169.951	42.3721	61.8028	25.5895	150.405	24.985	50.0674
588.489	85.6771	83.1283	71.8724	99.6769	106.74	97.9922	91.3183	109.113	39.1891	71.5645	76.5461	91.4356
402.357	31.0222	23.667	16.4025	91.3124	126.102	219.68	32.362	103.461	20.8093	114.505	37.8619	19.8179
399.253	788.973	3220.22	1712.34	2740.29	1281.52	923.713	883.214	1455.05	602.884	2572.48	4974.23	715.435
503.359	120.077	103.848	99.5158	119.939	112.379	107.233	139.251	119.923	117.223	122.149	117.077	130.515
539.42	74.0537	160.937	95.9769	117.388	108.705	109.516	118.039	116.09	83.1836	110.788	121.973	92.5008
561.398	157.016	111.779	89.3226	132.716	123.717	142.2	135.164	132.092	220.331	134.857	136.64	157.634
