# Supplementary material for: Transcriptomic and metabolomic profiling of long-lived growth hormone releasing hormone knock-out mice: evidence for altered mitochondrial function and amino acid metabolism
Source: Aging (Albany NY). 2020 Feb 23;12(4):3473–85. doi: 10.18632/aging.102822 (PMC7066919; doi:10.18632/aging.102822)
Supplement: Supplementary Table 4 [file aging-12-102822-s005..xlsx]

## Sheet: Table S4 Negative metabolome
mzmed	10722	10722	10724	10727	10728	10729	10713	10714	10715	10717	10718	10720
78.9608	31.8648	26.1654	36.1921	33.2813	39.4528	53.5817	19.1552	42.5705	54.9276	52.5845	17.9146	53.2601
194.046	40.0712	23.8736	36.371	35.3761	49.7128	62.9539	34.4294	56.6384	41.4456	46.0189	32.6621	59.7727
199.036	40.4352	17.7315	39.9411	33.6781	37.6779	54.884	42.3998	49.2705	28.6006	36.5374	38.0322	39.0164
166.034	24.6202	9.47997	42.7809	39.7284	60.129	76.2089	21.4977	58.9811	53.371	59.5473	31.8592	42.9942
154.921	233.033	139.45	257.775	204.113	220.828	418.369	165.262	186.023	250.433	243.973	198.019	287.942
199.805	101.69	2.88327	128.218	93.4219	160.084	774.808	360.901	136.888	144.722	130.243	182.426	148.126
197.808	235.13	7.0622	271.063	182.184	346.667	1595.58	743.465	279.057	297.004	265.894	388.857	306.011
96.9621	363.757	421.714	311.639	255.79	455.858	723.655	161.443	455.329	442.085	313.612	312.208	1030.74
162.985	132.815	140.979	128.542	140.337	153.611	221.198	87.6944	119.268	94.1487	104.442	124.646	123.919
135.031	395.591	199.516	424.186	387.188	442.507	193.255	127.997	479.161	352.183	429.251	416.318	427.111
195.811	192.403	5.66538	225.231	145.987	268.229	1284.35	603.754	229.23	241.315	211.448	311.394	245.976
194.937	38.4166	15.9768	42.2994	31.6995	58.8516	45.6886	18.2914	65.7363	48.7876	57.0177	24.6292	70.8104
106.024	38.099	20.8526	38.9839	32.4542	41.4715	36.1771	14.3489	41.1576	25.7555	37.9884	38.9957	38.4891
105.02	914.753	546.959	923.893	769.958	1002.13	888.513	342.156	958.303	627.593	887.168	922.027	900.922
216.912	47.3006	4.31317	54.0282	36.2496	96.7998	133.598	46.0746	83.2254	67.95	48.5594	32.3819	68.64
224.971	73.8687	16.9554	58.9776	54.9246	76.0261	113.619	34.2128	59.6439	55.1375	47.8564	57.8906	63.8591
386.032	53.5197	24.4818	38.1947	51.5322	97.1746	137.995	92.2724	188.004	116.563	87.012	96.6537	103.283
75.0111	733.35	943.053	736.67	708.08	748.72	313.81	97.2464	808.332	642.425	746.859	727.481	827.531
57.9787	30.3635	30.9059	25.7017	22.2248	42.8368	52.3517	7.42253	9.24529	6.2359	8.39124	6.76948	7.71244
229.048	150.201	42.1257	88.2123	94.0255	127.177	243.272	112.895	60.1006	40.6837	163.822	120.399	131.091
145.015	54.9745	78.7955	149.499	55.3883	59.6981	93.0156	55.2777	363.77	100.542	92.9025	78.8384	126.389
118.999	437.233	458.879	660.938	527.455	666.706	191.406	81.0257	697.564	437.502	631.131	614.794	599.26
133.015	526.279	644.953	769.763	806.575	777.013	1139.65	166.225	1307.37	865.024	1279.29	526.745	1045.21
134.018	30.0277	32.3367	46.2265	47.1723	45.8409	66.0484	14.6359	70.5116	49.3396	74.1641	28.9034	59.535
87.0102	60.293	77.6792	90.8994	102.478	105.975	68.8274	35.6977	172.204	113.75	165.081	66.8309	135.457
457.938	30.3936	20.0725	45.1867	18.762	21.1965	146.374	76.8715	68.3537	43.6163	65.9032	92.584	66.6662
355.908	80.3844	103.115	110.432	69.4749	60.5545	358.868	179.758	123.592	97.803	111.462	181.766	123.227
435.957	59.5341	33.3014	93.3025	41.6451	35.0153	200.211	91.769	165.032	103.801	171.676	184.012	150.503
245.947	22.3477	24.1876	25.5377	17.5386	12.7379	50.7452	16.5566	32.9441	27.1145	30.2943	43.5793	33.089
547.933	16.1421	16.8794	21.7535	13.693	10.9055	49.1756	23.7902	27.6321	20.6203	26.1735	44.155	30.8391
289.936	80.023	92.5254	91.6332	66.9958	56.3311	200.798	64.9461	117.855	94.3467	100.817	173.897	112.533
279.907	121.956	101.552	201.316	115.373	102.701	536.805	289.432	227.023	277.108	194.596	379.938	192.418
467.885	61.8864	88.3048	78.8415	52.9495	44.2684	261.779	113.798	81.0098	63.7683	71.8141	136.749	82.4299
191.02	884.444	1044.03	1269.49	858.703	776.389	1730.85	779.98	1948.95	1160.53	1594.82	1849.15	1564.94
302.996	233.394	334.626	321.683	227.87	195.534	558.562	335.921	422.602	292.373	342.578	460.478	362
436.957	66.6348	120.523	88.3528	58.3026	54.4683	245.742	107.078	105.805	74.011	83.4781	144.803	94.4628
414.973	110.894	193.385	138.449	100.332	83.8969	285.637	141.489	150.565	120.703	126.193	192.152	134.317
192.023	66.8443	74.2098	95.3533	72.0038	64.6567	132.666	40.3061	151.697	129.234	120.485	139.831	117.779
445.903	57.6318	68.3139	70.5947	53.3232	36.4683	151.698	71.545	73.7633	60.2696	66.0094	114.995	78.5323
405.027	55.5475	46.3356	82.3814	40.4268	39.3622	235.251	71.7056	138.985	76.7496	112.407	141.142	108.196
333.926	172.37	203.163	253.956	168.596	119.994	345.035	192.825	339.601	264.077	359.069	416.587	361.248
149.009	161.244	189.493	323.327	259.861	336.863	129.414	46.2686	444.205	265.796	436.091	269.256	348.86
346.055	5.45909	312.524	81.7943	1013.06	319.847	5323.03	6.64381	9.5527	8.20735	359.367	7.43018	21.7914
182.013	98.4908	354.749	120.378	235.623	165.928	340.047	37.5845	127.345	182.298	234.267	104.619	86.1756
293.989	24.9031	61.3917	28.2393	38.7254	27.6427	83.9305	13.8528	18.8212	31.9904	41.3852	22.6194	13.3979
128.036	45.5145	87.1112	89.5846	91.3949	104.911	180.704	79.7814	115.649	121.113	108.089	88.5175	76.4892
168.024	12.6754	14.7354	34.0891	37.7257	14.0988	58.1404	19.526	47.539	25.6542	64.5907	18.3905	45.1483
183.016	18.6541	38.7934	39.1708	48.3929	20.3517	43.91	11.7062	58.9101	32.3818	71.7482	23.8674	51.0485
167.021	183.778	408.42	442.282	457.083	214.989	775.335	261.414	605.073	330.203	914.128	328.329	582.523
257.016	47.5076	94.7846	141.996	136.797	58.3974	164.8	65.454	164.49	101.76	360.394	88.868	299.675
229.021	54.9821	78.4945	137.254	148.208	61.1637	97.9099	29.7881	199.255	105.254	286.736	80.2998	191.494
338.065	90.2545	391.342	177.645	216.178	109.724	85.4282	28.2269	92.3965	218.005	379.214	105.012	357.123
723.117	33.2963	86.1143	64.7441	77.6795	24.392	47.2692	18.5652	28.2575	67.6153	120.481	40.182	116.457
322.071	54.1778	228.557	127.195	111.298	52.1566	64.1049	16.8247	45.6278	118.792	215.825	57.8784	194.895
701.131	25.8269	107.436	52.6474	55.4588	22.9952	36.6881	12.7192	24.1965	59.2782	99.3762	26.1025	100.934
611.144	682.884	4311.12	1776.28	2067.47	996.585	1974.53	490.357	718.535	2408.92	4170.99	1007.4	4089.51
612.147	186.663	1145.96	476.028	558.16	275.138	524.994	141.832	197.502	654.964	1124.63	271.493	1098.16
306.076	237.394	1274.59	576.232	639.331	375.747	344.979	134.676	270.532	708.709	1257.25	343.506	1159.9
655.107	47.1125	230.378	94.1823	120.105	61.4557	142.72	48.3587	35.8167	106.554	153.903	68.7315	174.632
59.0168	24.1765	33.0059	24.8328	14.6198	13.2519	11.4923	10.4306	29.3864	29.0361	26.6459	45.0861	22.8908
709.109	24.3414	71.8572	46.5921	42.7749	22.374	37.1658	10.8431	20.9907	55.1494	90.1638	20.0537	86.6851
613.143	109.44	695.616	284.493	319.034	164.269	298.665	83.7225	122.962	374.609	670.735	162.344	655.201
633.126	193.33	1045.65	443.123	562.944	268.468	557.511	162.157	178.215	554.036	901.949	281.365	875.504
635.122	40.1097	181.46	77.5894	96.1594	48.3913	101.965	34.5575	32.1105	103.697	148.751	48.3201	159.088
745.096	28.0305	84.0684	38.4641	57.1679	26.9698	42.8189	19.3076	19.4983	38.7582	63.9145	27.481	72.9935
634.126	56.5971	302.04	132.022	165.433	52.991	175.612	51.9523	58.5374	156.602	247.877	83.2429	252.117
333.058	72.2825	117.443	303.095	162.665	102.702	150.064	40.015	323.399	724.066	702.629	118.973	612.895
279.037	114.606	294.809	541.968	295.048	269.869	573.306	171.489	608.925	1264.47	1145.75	246.724	1084.78
312.942	488.905	518.071	464.023	535.567	429.41	990.17	577.459	361.619	335.821	350.434	410.056	400.46
281.034	61.2067	114.63	203.017	118.775	109.189	207.419	60.7828	222.412	457.914	411.195	91.7665	371.61
243.062	62.7751	149.91	195.031	122.63	75.4194	129.86	44.3818	204.991	439.407	439.711	93.5407	451.544
174.067	70.3411	70.1852	111.864	73.984	67.5152	73.2835	37.7609	87.6287	74.9823	85.2756	61.8755	67.8476
404.024	38.1828	81.0571	56.7412	74.4779	48.7817	102.449	18.6538	33.4203	40.4727	60.0457	32.0961	57.3484
139.014	38.4915	31.0448	43.3094	38.3719	21.798	20.5131	12.5566	36.8939	26.9661	52.7194	36.542	52.2418
242.064	109.12	213.056	223.742	102.57	92.2438	87.2655	55.3797	137.335	112.333	150.535	93.9042	127.49
304.062	68.5099	303.27	279.732	329.496	215.765	292.216	32.0277	72.3906	139.112	464.784	75.162	304.39
216.041	68.0854	130.033	138.603	68.4574	80.959	186.73	134.24	113.337	74.7693	81.1925	68.6849	74.7965
151.026	30.41	376.981	342.092	125.711	53.6846	86.1919	21.4371	313.946	607.176	760.919	31.955	576.76
297.983	49.2012	74.7343	60.3338	42.3798	44.1193	91.2308	62.5305	48.978	32.454	36.5543	43.6186	35.3784
198.074	50.0342	114.488	68.2084	49.5955	39.6305	57.2188	29.1297	53.1969	39.8566	48.6859	39.6692	44.2883
238.025	82.3041	190	131.349	79.7012	78.0612	162.492	116.372	111.421	79.6299	85.018	73.19	81.3732
181.07	37.6747	102.38	81.7875	42.6109	44.5285	68.0245	42.2317	67.0222	51.47	64.6346	38.9288	49.7622
180.066	342.474	898.347	686.063	331.507	341.936	604.091	380.589	521.718	395.229	466.202	297.697	405.516
104.042	25.7934	30.7443	25.5287	18.2161	18.482	17.6187	12.5924	31.0253	25.4579	37.2032	29.2157	27.5495
103.041	365.717	460.883	341.69	225.552	271.909	294.773	210.357	468.207	382.809	529.631	466.677	451.201
169.026	57.6293	55.5715	67.4853	62.2391	43.5402	19.6631	10.8369	52.9265	58.3163	71.2153	55.9565	72.5757
152.037	38.3396	45.498	57.3046	45.9545	26.3681	22.8415	7.28809	58.1421	62.8005	80.585	38.8745	71.9081
196.025	65.1024	80.9446	103.317	69.6489	56.6667	47.542	28.5021	69.1395	67.8533	72.5912	58.6078	74.7803
84.0107	185.495	218.861	186.264	192.302	127.454	63.3283	21.4883	168.307	159.684	181.437	163.101	202.958
173.01	60.8565	92.3569	228.738	70.8569	215.253	241.326	202.816	406.225	257.807	371.147	125.221	232.771
171.037	94.7763	141.998	101.003	108.541	111.506	87.7068	43.5683	119.851	95.0324	112.819	101.92	99.8231
148.944	51.9107	68.3517	58.2527	68.7839	50.2033	42.8325	19.8231	58.6222	52.8129	51.6865	52.8879	51.2306
141.031	180.199	209.951	192.248	183.618	136.114	61.03	25.0598	176.056	157.717	185.194	164.393	194.43
161.024	154.576	176.863	182.959	157.211	188.487	155.485	123.361	271.805	168.878	213.574	165.222	209.496
129.015	74.456	108.921	165.559	83.5594	185.48	166.976	114.631	278.642	153.017	234.142	96.6754	172.316
292.116	104.581	221.112	203.814	106.364	143.399	211.14	140.142	416.321	133.833	161.357	103.987	139.658
252.946	9.5645	7.18217	21.511	9.54788	40.6405	56.1283	49.9882	40.9627	30.0819	31.3703	10.4135	24.7955
260.015	54.0322	61.0112	58.5804	46.9866	63.2447	58.038	35.8343	94.9343	44.1093	50.6707	41.9721	67.8319
302.065	17.95	458.382	291.221	532.148	395.947	584.162	16.2462	36.8292	33.7662	480.7	22.7995	204.438
312.086	23.888	280.636	144.13	255.583	175.726	196.848	23.3684	41.8091	42.5734	259.778	31.4107	111.018
263.032	42.0797	60.5287	73.309	52.8021	113.163	76.656	88.3437	77.0405	92.0683	112.818	63.2828	70.6644
282.08	12.2163	218.982	214.1	180.019	112.453	87.6049	9.0881	36.6984	95.2638	185.185	30.1835	172.853
268.075	15.375	158.923	134.981	74.48	31.9611	28.8267	4.64785	50.2354	204.744	286.984	17.106	176.636
267.073	38.2459	1042.64	851.398	356.696	166.581	194.941	23.4788	248.801	1415.8	1928.38	29.7383	1186.14
480.565	6.90211	74.7503	10.5253	42.6026	12.7522	30.3087	0.621261	2.56714	17.451	47.85	5.00584	19.4879
324.071	133.92	82.5899	98.9706	124.292	155.659	77.2699	111.659	146.837	126	353.192	170.586	468.441
653.152	138.514	495.139	200.93	258.967	206.597	245.949	9.29246	95.7953	108.7	303.714	122.688	168.167
675.129	50.2114	178.613	78.7015	100.334	83.1203	104.168	11.485	38.8263	49.4676	129.997	42.8125	58.3118
810.402	123.989	1625.76	43.7062	95.2916	19.6541	40.4505	4.17083	1073.03	81.0122	175.948	193.023	88.5112
131.035	131.478	176.981	388.162	159.717	173.932	174.663	108.022	556.168	498.571	940.13	175.566	615.709
488.563	10.0713	138.875	24.1992	68.5807	18.5772	43.4099	0.955213	5.76709	35.9728	65.213	6.90406	18.807
210.981	29.3171	30.0651	61.7795	36.4358	45.3955	40.3967	31.8788	84.4265	69.6226	115.368	37.6457	82.1262
338.051	136.577	58.024	95.4959	132.362	216.489	201.218	103.192	103.885	266.838	261.605	153.626	225.098
999.42	153.777	4.81185	129.745	147.442	169.22	107.79	154.74	167.914	173.179	230.668	225.313	224.616
999.924	155.683	5.45882	126.24	139.646	159.09	104.872	151.594	154.713	160.504	214.413	218.467	213.674
176.054	31.7357	67.6361	59.1931	40.1221	85.3104	45.5942	21.7328	71.407	30.9848	43.5348	39.8202	30.3026
115.041	242.154	257.215	171.93	290.558	204.724	251.788	188.595	223.788	171.376	186.957	281.058	145.837
588.106	47.1357	234.065	97.8836	216.441	72.4791	81.0343	22.2214	51.776	226.194	389.26	52.1485	197.948
596.136	33.5662	123.97	108.245	250.739	128.052	161.825	51.0324	66.4208	90.3039	214.051	38.825	90.7909
147.006	94.905	124.964	140.331	154.518	139.462	128.022	73.1496	209.326	127.392	172.202	97.6095	133.192
144.059	123.093	162.091	272.959	124.21	118.484	149.339	45.7856	626.585	110.826	1773.84	246.134	1136.99
277.068	268.419	228.147	407.617	312.71	520.696	417.746	417.245	627.273	567.569	351.314	342.157	418.772
291.959	58.9679	62.024	81.0451	70.766	60.5582	71.3034	48.991	91.6497	68.2028	69.6412	71.045	62.5921
467.03	64.0461	74.9354	118.767	69.2276	82.0122	137.827	96.705	126.606	42.2487	60.6984	64.277	85.5042
339.937	65.3477	60.2399	78.0048	87.2114	75.1705	103.635	75.6091	82.9493	61.6807	48.4357	72.3118	51.3106
165.072	178.937	180.188	262.985	227.791	172.087	164.87	103.447	340.615	220.232	236.379	186.088	207.239
359.011	66.5897	42.3508	102.66	53.1049	99.8589	125.489	103.327	182.763	73.2351	108.957	67.5013	76.5839
469.031	63.6356	60.4335	101.442	98.4335	83.7988	112.036	81.1136	119.219	73.174	61.8083	66.796	61.6883
397.902	39.5951	35.429	45.2582	51.8176	47.2064	59.3154	48.2028	55.1806	31.9565	29.2253	42.2984	28.563
164.072	1621.24	1659.93	2354.82	2097.08	1538.17	1470.93	960.99	3064.65	2039.81	2118.58	1714.2	1845.44
232.061	313.461	408.487	361.617	369.17	311.655	260.472	142.153	430.382	328.746	319.259	311.752	303.547
279.975	98.2744	96.2532	133.01	131.63	106.061	133.824	98.4201	160.336	112.503	85.9333	117.876	85.3974
337.943	57.7259	51.7328	71.4411	70.8881	69.0279	93.1808	77.2255	87.7998	53.0254	44.7271	56.5737	37.0346
224.024	141.728	153.062	193.042	180.81	148.922	144.052	99.6937	221.034	150.945	141.262	150.316	128.004
163.552	27.8801	26.949	35.2079	32.9285	29.1884	24.0875	16.1155	34.8889	29.3569	32.9572	26.6086	30.871
222.03	413.64	449.509	529.101	525.814	417.811	425.351	289.969	645.344	457.059	397.174	453.991	364.737
887.377	267.068	4.97296	230.305	253.886	208.228	134.583	142.043	237.059	216.382	413.518	319.269	383.678
888.381	117.437	3.85305	94.7623	112.676	86.5175	67.4172	60.5151	114.73	88.9283	183.351	142.182	166.956
887.88	221.397	11.8562	199.998	223.608	166.068	123.967	130.907	199.743	180.079	363.438	286.721	345.443
507.127	139.223	61.9778	208.303	125.756	308.028	146.679	230.572	298.378	180.677	545.168	154.424	306.762
309.998	56.0662	39.8405	64.9672	60.9206	50.135	32.2988	22.8905	71.7879	56.0785	58.194	59.113	57.924
888.888	51.3789	11.3241	43.6964	43.2587	36.0555	24.7373	31.9124	51.0932	46.95	82.4279	60.9654	71.2026
344.117	152.996	191.745	263.709	234.464	176.555	175.086	124.62	407.602	237.316	208.726	176.836	194.036
357.995	69.6904	93.1288	80.8974	86.7988	81.4605	66.2409	47.7651	80.0013	59.468	60.1587	75.2595	61.2704
159.066	266.732	348.071	515.189	236.357	282.12	158.507	270.985	467.799	148.007	264.471	139.138	471.405
97.0674	20.4491	22.6145	31.8817	14.7249	19.202	9.67306	18.1925	32.4418	10.1593	13.1544	9.46815	30.1297
300.048	88.3839	120.335	93.9515	101.189	78.5238	64.7835	46.6432	110.395	86.5611	69.886	87.5759	83.2128
326.118	148.557	182.043	248.529	127.01	131.714	139.515	115.999	384.258	139.841	303.091	115.136	247.636
669.148	144.391	1361.7	324.519	401.683	241.458	227.114	43.9375	127.926	340.93	625.708	172.809	416.328
691.124	61.3548	497.007	112.484	141.637	93.3081	95.37	29.1335	61.0359	116.996	180.885	69.8744	135.108
278.065	98.4543	102.801	150.842	109.126	127.263	105.271	116.851	235.147	188.973	174.035	126.823	147.787
286.083	84.8941	110.488	121.114	86.775	74.5114	51.405	56.2499	190.501	153.326	196.114	105.078	165.808
276.067	176.693	218.773	294.86	214.146	181.006	153.813	181.73	485.354	372.372	361.18	232.218	284.239
254.075	82.6694	86.2327	138.993	94.4674	76.5867	58.8592	87.1747	209.673	165.413	175.587	109.711	143.764
218.102	552.397	676.287	953.542	585.991	462.759	323.291	497.114	1569.43	1287.19	1420.72	807.606	1078.45
309.102	266.087	268.458	494.329	305.563	609.938	505.636	282.517	692.245	537.038	531.381	380.666	543.6
195.035	60.9708	58.602	105.007	68.8202	68.0204	45.3166	60.1998	127.23	45.2945	70.8577	53.1699	121.471
483.082	182.46	510.423	395.107	384.995	463.464	369.61	93.811	311.528	336.286	439.033	170.886	323.752
219.085	176.993	148.59	284.336	149.293	148.104	84.5507	136.867	280.455	133.536	202.312	373.652	238.363
143.07	59.8875	68.879	158.4	54.1432	72.1805	29.6455	60.1926	101.7	37.7033	56.2227	46.6632	154.307
382.099	205.349	215.095	455.322	591.951	179.06	255.114	120	676.074	773.44	1843.84	379.365	844.899
981.499	116.623	3.98204	213.253	127.579	50.4048	25.491	67.8695	142.667	214.391	392.843	170.926	278.531
716.556	20.8373	52.4544	36.1886	28.6409	40.8716	35.0159	23.4661	28.0184	14.5956	24.9969	25.0317	22.438
718.551	28.6833	46.0614	20.0517	17.9433	32.3908	27.6138	24.7939	23.6245	15.4974	31.916	32.446	23.7635
536.679	59.9542	57.7317	48.2996	44.6875	58.0106	53.5605	40.8916	60.1177	30.892	51.1207	51.5349	53.4882
894.91	58.6672	14.058	44.1938	45.6516	43.7404	36.1457	33.5126	48.0002	44.3516	57.4071	54.8006	55.7541
532.667	119.608	145.996	126.084	106.733	156.204	135.234	108.906	140.581	88.2645	116.666	108.35	125.295
530.671	109.716	110.175	103.581	74.8491	131.844	115.549	95.6528	120.816	68.0666	102.855	104.493	110.025
714.55	23.4895	28.7892	23.3926	19.9871	27.0353	28.6514	18.534	23.0724	18.8129	22.9297	19.7519	18.3578
818.324	165.372	76.0764	184.059	218.228	189.051	171.859	117.776	202.467	229.187	148.898	185.24	191.907
197.808	392.843	197.563	494.173	383.828	440.698	517.121	522.274	393.217	252.531	323.437	416.266	388.576
534.667	95.216	121.245	90.8889	80.8986	114.967	99.8635	84.4909	99.9775	54.442	90.7942	87.6751	95.1147
195.811	305.659	166.493	409.23	303.356	358.887	416.97	433.974	325.978	200.566	252.599	340.65	302.179
348.78	292.864	286.508	285.657	273.444	341.283	337.41	266.224	354.554	239.851	296.598	285.017	298.746
330.794	86.036	76.1044	93.4712	73.469	96.1202	82.2257	68.5821	102.517	74.6202	92.7098	85.9013	107.392
350.785	138.282	134.363	132.723	122.037	156.37	156.726	123.388	157.134	113.458	128.361	132.515	136.111
406.74	68.2896	74.0689	70.7055	69.6629	94.1818	81.9581	67.345	80.0675	53.9196	66.861	73.5406	60.1724
404.741	69.0248	79.0937	74.1503	61.0483	89.8642	90.9315	63.9674	86.4749	55.7618	64.2777	68.7554	63.2922
402.745	38.47	39.1779	39.3583	31.6938	48.1807	43.8418	32.6472	39.0028	29.3904	30.0381	40.5949	35.2636
441.735	40.487	32.1744	30.8713	26.386	34.9741	41.0188	21.9687	30.9346	29.6835	38.2404	44.1669	34.6427
199.805	177.985	104.396	232.485	186.957	204.701	213.697	242.834	191.747	119.295	152.668	193.389	187.342
304.794	148.159	145.937	145.169	134.022	166.979	151.247	116.754	171.257	113.238	149.129	140.144	148.784
408.749	51.6901	49.4618	47.7925	46.4731	55.3583	52.9315	41.8609	51.1478	40.2382	42.2966	43.9686	47.8543
302.794	184.436	184.409	168.313	143.328	190.8	186.23	134.863	198.044	133.589	167.241	157.518	177.319
324.798	884.556	805.773	914.733	767.051	964.194	854.167	733.357	1065.71	694.223	936.843	803.69	961.684
326.795	746.468	655.797	753.433	624.098	811.623	706.269	600.262	872.455	599.221	777.534	691.183	817.118
322.801	447.908	409.964	446.98	382.98	473.827	428.564	368.151	536.644	369.293	490.041	412.316	502.241
328.794	322.491	290.864	334.966	276.376	352.893	316.493	267.421	390.522	257.505	350.163	304.628	363.881
449.664	212.286	127.385	211.019	197.858	200.808	233.682	211.987	178.317	178.863	176.677	243.437	210.307
344.786	190.204	186.603	187.567	180.491	214.42	216.016	176.643	216.416	164.833	181.861	186.157	185.427
451.658	236.296	149.115	238.083	225.955	215.206	253.884	228.229	206.923	236.892	218.404	259.412	241.975
224.851	26.4434	30.7102	29.5508	33.1834	33.6878	34.0163	25.7665	42.9737	26.1327	27.8612	35.4369	30.9199
276.818	37.2395	40.5096	32.0171	34.5379	53.6242	57.9647	38.0006	36.1219	29.1907	19.4404	39.0925	28.7948
414.698	36.3247	10.419	28.7794	25.3834	31.9838	26.8454	19.8814	28.6841	23.3974	28.3021	28.1877	29.5314
236.823	15.3394	22.3352	13.4946	15.8708	15.8631	18.5789	12.3704	18.526	9.39286	14.6171	13.6807	14.7469
300.802	107.26	91.5644	98.5125	83.8626	113.399	99.1424	77.8205	117.633	75.6679	105.092	96.6219	99.7675
306.789	64.9276	72.5691	63.0836	60.0587	78.8703	74.3799	55.2557	68.9039	59.5181	64.6554	64.745	64.6889
346.781	356.614	345.446	363.558	324.636	415.748	409.032	322.082	425.095	300.708	356.606	340.967	351.579
464.73	39.7522	39.1506	37.2841	37.1448	41.5067	50.2511	37.2145	43.2185	31.8721	28.3171	37.6098	35.9996
453.658	150.156	94.2873	139.251	136.311	135.912	172.475	147.25	117.881	123.767	115.946	169.767	148.545
447.67	96.3897	58.0798	92.6674	83.687	86.0289	108.717	85.0424	81.7367	77.2848	78.9356	113.285	98.414
469.741	32.8627	27.7095	24.6207	22.785	30.517	27.738	19.3695	25.0593	29.8247	26.9259	34.8372	34.478
455.655	59.7474	38.7942	58.8371	50.0877	54.4519	67.8463	61.231	52.0213	49.7877	50.1121	68.534	60.3503
324.737	43.0816	25.6345	42.3984	34.5582	45.9743	42.4335	40.0832	33.8428	29.1791	29.1262	38.3134	37.5227
234.823	19.6441	26.1671	16.8102	21.8411	24.9952	21.6377	17.8444	22.5748	16.1371	18.1494	16.2583	19.625
161.897	163.957	149.006	164.206	181.501	185.901	172.73	119.411	193.047	141.905	157.061	164.084	167.821
165.9	53.9859	53.939	61.5295	53.7522	68.2703	53.6724	40.8855	72.2697	49.9264	60.8523	62.6901	62.9163
326.734	31.9434	23.5453	31.9251	22.8716	25.6967	33.4247	30.837	28.6304	22.2153	26.6552	31.1618	25.597
405.83	25.2145	26.1732	30.3893	19.3182	18.2156	22.3666	15.8448	30.1382	27.8191	23.2224	33.0394	30.1026
416.752	49.6595	37.3972	42.423	40.4828	53.0888	47.4008	33.6579	50.1599	43.8153	39.396	46.7402	44.9757
325.732	536.623	364.234	586.819	478.61	549.228	616.146	651.7	537.842	391.129	463.056	588.7	553.784
321.738	380.08	253.072	414.369	338.303	381.339	436.516	443.451	373.677	278.356	321.956	400.935	375.111
218.856	190.124	176.287	184.138	193.905	220.668	221.655	167.399	209.812	152.012	169.894	178.514	184.988
323.735	681.08	456.716	744.97	610.929	707.209	788.486	834.153	660.271	484.071	579.802	728.224	690.945
327.729	241.618	151.966	264.53	206.9	246.288	278.296	273.477	226.098	174.965	199.674	252.84	243.52
163.895	168.639	147.293	169.087	176.309	183.277	180.165	119.929	194.239	143.037	170.034	159.285	173.69
280.813	45.6319	43.4732	47.3023	43.1579	50.6445	56.5285	40.6213	49.3846	31.2067	34.8108	41.6891	34.4607
278.817	64.3307	66.2111	58.695	67.0526	81.2254	80.2465	56.1261	62.1046	47.5287	47.3919	61.2183	41.3981
329.729	59.062	44.6467	65.5952	53.6214	61.2993	64.7983	66.7323	53.1414	39.3265	51.9734	63.2891	58.4184
353.83	62.5681	65.7026	69.0412	65.7132	59.3454	58.3791	33.1122	59.4862	65.8293	57.5268	77.5342	77.1566
345.791	29.6454	28.5343	25.2767	28.5374	32.7323	29.5492	19.9626	31.6222	27.5267	24.7756	32.4956	25.77
178.864	47.1132	43.3363	43.8586	42.7571	52.7709	50.4076	35.3281	52.2284	39.7086	38.8774	47.6503	38.6358
220.853	249.188	232.67	247.804	253.704	289.102	281.96	210.703	296.273	207.608	216.121	242.689	226.582
222.85	124.217	113.924	122.475	132.498	138.214	138.849	103.219	143.487	102.037	106.037	124.364	118.147
162.894	6665.38	6251.34	6952.68	6900.49	7504.03	6745.34	4879.25	7971.4	5861	6449.41	6567.57	7170.71
160.897	6582.47	6200.81	6845.98	6809.25	7451.32	6703.69	4828.65	7873.78	5790.9	6456.69	6475.39	7098.09
164.891	2261.61	2108.91	2341.73	2331.08	2522.19	2277.43	1620.49	2746.52	1957.77	2187.23	2213.04	2434.75
119.909	99.0016	91.5817	98.0513	102.249	106.851	88.0963	63.3498	113.272	84.7007	96.1759	96.6262	106.655
186.895	56.3888	58.4856	53.6897	51.8621	59.9162	49.1345	30.0658	60.6428	45.5527	51.4516	52.9773	56.2264
228.89	71.0162	89.6011	71.788	83.0782	78.682	67.006	43.8806	79.2701	61.9897	60.9612	72.502	76.3759
338.777	31.0153	33.165	27.9962	30.8688	40.5351	38.6003	29.2468	31.0345	21.3925	21.9435	29.8874	19.6741
288.82	50.9515	60.1467	49.3499	60.933	64.3783	59.1233	39.3767	61.6556	43.7124	47.1986	57.1832	50.9817
160.397	62.0484	57.6032	73.0921	72.8768	68.2497	67.8509	47.0914	78.6884	53.6294	62.2911	58.5918	66.2134
174.866	68.9064	63.4358	71.2676	66.7119	80.2066	74.9098	51.4679	77.7177	56.5451	61.5715	68.1862	63.4409
336.776	28.2729	29.5888	31.7571	31.5532	44.5244	51.588	35.0268	29.3534	21.7219	20.7131	29.8423	21.2917
282.825	28.159	18.7169	24.9564	18.7012	26.5833	29.3321	19.7241	28.5596	22.1603	21.0456	26.8533	25.8255
162.388	62.09	62.767	66.7371	71.768	72.6087	64.1101	47.8906	83.1495	56.6508	67.27	64.4003	67.1573
347.798	33.0618	29.0775	27.5073	28.6767	30.5914	32.5796	22.4939	40.3505	31.9811	30.7645	28.1975	32.5547
206.904	70.5809	61.3054	68.2333	73.6962	85.4102	66.1868	46.4289	83.4465	61.5293	65.1453	63.7678	77.9805
122.899	333.299	309.229	334.695	333.055	372.217	309.234	211.377	391.92	292.807	314.155	327.584	345.387
116.547	70.2292	72.0723	80.3105	79.8088	84.7847	71.1397	50.9874	90.5826	65.4322	75.9071	75.1681	79.0038
305.783	14.008	12.8893	12.4321	12.8978	15.3184	13.9551	11.4708	18.1835	12.0515	9.22359	17.344	11.6936
168.062	38.6137	24.1356	35.442	82.3252	75.7818	16.821	30.9471	69.2418	80.5584	27.5875	44.347	27.7775
383.748	60.7532	29.0222	52.9753	49.1172	43.3218	57.9545	47.0077	40.7937	56.0724	47.6538	66.6585	62.6538
351.832	74.9235	62.8631	74.8663	77.0398	68.0998	70.0082	42.2334	68.2128	72.4643	71.7861	81.0827	90.4059
118.905	7961.69	7561.96	8169.03	8178.55	8939.15	7512.91	5217.21	9431.18	7140.41	7858.07	7946.15	8416.96
116.908	7549.08	7254.04	7787.37	7786.52	8481.05	7129.22	4953.25	8926.84	6764.27	7459.04	7516.4	8114.38
120.902	2797.02	2672.3	2880.97	2906.72	3165.75	2620.76	1826.23	3300.78	2505.15	2735.62	2780.95	2944.09
117.912	91.3069	87.0498	93.7126	97.1646	100.737	84.4502	57.2178	105.542	83.9357	91.3904	86.0855	95.9193
118.538	75.615	73.4756	81.2997	82.1548	94.3932	74.073	51.4219	100.457	70.0591	75.3681	80.4291	83.9695
121.906	35.4562	36.633	36.4896	38.8148	44.787	33.8478	21.7891	43.7901	30.2853	36.4719	36.864	34.7416
120.529	31.4436	28.8482	33.7683	34.8747	35.389	29.2964	20.8636	38.4178	25.8409	27.534	35.879	30.0846
164.38	24.7938	24.9079	31.2955	24.4644	29.2392	27.4991	17.7842	30.9081	22.2451	23.7186	25.5423	27.0228
230.884	74.2975	74.8926	67.7056	76.5638	85.1061	69.5658	39.2772	79.2763	68.9262	67.5029	74.0712	68.0783
308.814	31.4076	19.0341	31.0212	27.5444	30.9502	26.9905	18.718	31.0327	27.6094	29.7055	27.6265	28.656
385.747	36.3827	22.2352	32.3788	29.153	35.5177	36.8783	33.7042	33.7906	33.8753	32.5492	29.4777	40.0764
381.754	42.0539	19.6776	38.1803	34.4002	32.3812	39.6379	33.8926	25.8559	36.4682	31.8727	38.486	47.7229
290.811	34.5948	35.4007	35.7965	36.9589	38.7088	40.1026	24.3891	34.5757	27.1223	29.2377	30.1493	29.4528
296.879	76.943	76.5186	72.8039	59.9038	79.3914	76.5059	43.457	79.3445	60.5708	68.5335	76.6974	70.1625
342.958	138.444	142.472	179.067	213.173	193.593	206.668	143.162	291.433	180.823	159.021	137.92	174.8
343.794	38.3075	29.0647	34.4758	30.6814	33.5381	38.521	22.8303	30.9961	34.6287	30.3125	38.7931	37.0449
341.798	38.8858	31.4626	33.5115	34.4251	40.8368	44.333	22.0525	38.639	39.0088	32.7097	37.3975	40.3089
660.691	149.74	94.3474	93.9802	152.052	133.841	118.297	48.2937	168.962	240.615	102.698	122.801	138.274
333.766	46.1678	31.6137	49.0592	47.8352	46.0119	72.0525	45.5995	41.519	48.0781	36.1508	58.421	45.4777
331.768	35.6023	22.0218	31.6676	36.5733	36.4745	42.8066	34.4767	29.4278	33.8322	28.7212	42.4141	32.498
340.96	144.323	154.429	192.133	205.271	214.257	217.496	137.258	284.279	180.927	124.76	154.858	188.315
335.764	27.9633	27.1398	34.6636	36.8325	30.8832	47.1031	33.8156	21.3107	29.4624	24.7014	46.0124	28.338
681.69	52.8048	42.0844	37.3345	59.0513	48.7565	55.5662	28.5808	62.8692	74.6002	32.9367	46.9335	44.6443
356.827	44.4854	50.6684	41.2352	33.1989	55.1596	43.8151	23.6494	37.4108	31.5281	29.7178	40.2852	32.5212
355.818	33.8371	32.4201	30.4874	32.5737	29.7369	31.0788	15.9773	32.7588	30.9196	28.3864	43.2284	39.3598
670.68	125.104	100.93	92.9965	143.112	119.811	116.621	60.3096	154.615	207.355	71.4937	114.047	121.825
659.683	439.106	310.819	326.28	562.587	393.718	365.234	162.944	538.515	791.067	295.585	370.919	461.789
660.191	312.385	231.518	233.264	355.185	329.077	281.63	144.387	383.98	519.656	205.081	255.743	295.943
627.678	74.1596	66.3754	56.4354	87.2411	177.727	135.247	57.0893	77.4361	98.7693	35.494	63.2829	59.9137
638.654	30.3048	28.5051	32.1832	38.2689	65.2127	67.4723	26.7282	29.2864	36.9604	18.0929	31.2558	27.8908
267.014	86.7823	60.5992	104.201	74.3754	93.6901	48.6187	41.4467	93.2667	53.3652	49.1716	50.5122	118.373
170.944	93.6448	134.025	93.5951	95.2511	111.361	88.1029	50.7753	113.561	95.5233	83.9657	95.1285	86.0206
616.672	282.613	223.726	233.932	327.915	636.366	435.451	174.323	289.118	359.784	130.428	230.993	210.166
617.686	49.2677	40.901	40.3786	62.28	110.18	80.4265	36.4153	58.5741	64.5704	30.8207	45.8246	41.0325
616.21	874.082	439.368	619.017	1004.8	1509.46	968.109	574.041	864.261	1134.97	383.798	632.505	608.92
146.055	24.3387	32.4736	37.2786	46.25	35.1768	23.9726	12.5721	48.4885	32.2374	42.4827	50.0615	42.6099
145.051	306.448	366.024	381.786	486.251	382.031	261.707	145.821	537.021	316.503	465.295	600.104	479.448
519.72	37.0209	5.12848	25.1764	51.4097	37.5361	39.3611	21.6342	50.3111	99.4036	28.5801	37.7359	34.3064
118.062	86.2882	74.5523	64.9888	89.6881	85.3795	78.17	22.2396	45.1678	22.3879	26.9209	33.3955	30.7415
241.923	67.3837	33.4256	49.55	69.1099	63.2073	92.9438	44.8186	37.9372	24.114	29.0776	41.1944	37.5307
117.057	1303.57	1143.66	981.783	1340.46	1267.52	1158.85	357.39	577.545	305.362	335.474	432.647	429.926
185.029	210.093	211.48	158.339	193.048	175.639	143.653	56.7753	128.821	81.3742	95.0271	92.3704	107.975
391.545	40.0038	29.9946	67.8639	43.0965	35.4592	6.25803	5.39931	66.915	14.0757	10.4031	45.8406	24.8094
246.994	171.788	96.9888	259.759	107.583	145.903	189.329	145.542	389.712	226.58	323.815	188.059	264.733
149.025	63.3213	74.5676	116.956	45.0218	43.5027	157.187	39.4431	85.9212	69.8161	166.008	123.451	188.566
401.109	381.138	153.517	369.05	194.757	177.975	439.021	217.091	360.15	228.333	232.338	168.57	317.677
352.188	579.752	775.233	422.819	667.597	133.367	111.542	77.0339	132.049	476.234	543.12	358.091	549.476
252.99	119.766	237.985	278.47	142.164	129.358	146.238	108.769	309.608	173.71	268.89	221.265	189.835
388.166	259.659	271.808	184.44	316.14	430.552	319.187	42.4791	497.099	200.688	211.189	163.153	225.571
288.019	64.9367	109.685	198.445	81.1825	149.344	114.671	25.7947	140.108	142.943	168.544	107.694	217.979
287.017	247.162	595.638	1225.81	395.427	779.655	545.423	151.625	804.258	862.163	1002.07	525.928	1405.74
217.024	334.372	283.57	409.352	291.418	279.064	340.466	250.302	581.834	300.808	449.205	354.477	403.63
231.005	1120.42	1682.6	3699.4	1197.75	1021.16	1319.21	1164.71	3727.06	2058.56	2871.28	2392.58	2201.82
230.284	11.9603	17.6638	39.1808	9.85005	15.5561	14.2416	13.4799	38.454	16.9059	29.6748	26.2469	19.3595
647.226	185.959	95.3172	304.224	245.589	143.105	234.472	298.015	313.097	222.399	170.244	217.429	147.394
837.321	169.159	45.1037	305.133	198.592	103.346	189	222.437	309.156	237.444	163.444	176.253	132.687
445.142	471.396	173.899	627.199	523.378	352.711	477.044	524.781	637.11	558.204	422.851	468.672	387.185
859.305	187.137	40.3737	239.941	197.388	131.05	165.295	165.84	231.975	194.267	152.261	155.4	133.284
468.128	477.591	379.358	410.116	374.96	501.661	270.353	195.764	260.31	307.17	337.411	330.292	283.761
655.224	400.653	150.189	445.971	404.224	289.05	294.983	287.676	440.601	342.357	321.434	388.513	282.902
611.257	757.001	114.781	1469.28	846.166	345.862	690.529	1073.28	1465.39	1098.67	720.416	803.753	660.581
649.216	201.951	101.703	247.803	237.227	145.588	155.852	227.963	269.686	233.103	166.133	204.341	155.888
385.134	420.515	240.462	607.82	366.992	300.677	346.473	333.656	763.406	419.552	783.063	421.922	783.815
815.347	125.906	30.0395	275.123	133.81	56.9272	124.351	255.236	257.129	201.979	107.143	115.338	106.131
873.302	129.903	39.4456	199.381	177.392	137.036	195.953	187.698	226.9	182.81	99.028	160.738	109.95
408.173	1371.15	211.756	2112.97	1451.37	779.92	1093.01	1392.64	2226.61	1724.83	1343.68	1454.64	1167.89
443.15	998.309	243.605	1343.48	1014.62	706.129	1080.41	1208.25	1441.51	1078.27	854.13	1042.07	740.047
700.154	260.196	85.4385	258.888	234.595	190.37	223.844	230.376	253.255	248.141	208.766	314.765	202.944
444.151	297.031	187.483	396.995	336.493	246.044	304.475	323.279	415.13	351.608	241.211	313.887	224.845
407.171	5159.36	618.048	8215.81	5372.79	2745.02	4080.14	5214.53	8118.18	6574.71	4959.39	5268.99	4361.12
262.037	146.467	86.1032	137.542	165.327	126.723	124.235	86.6645	159.276	124.797	123.163	141.243	110.849
261.036	989.27	570.811	968.949	1040.61	859.465	850.679	618.581	1122.98	831.467	854.244	995.983	760.848
238.312	17.1195	2.39597	20.1363	19.9494	14.1597	16.056	16.948	23.3143	18.8919	16.2083	14.6655	11.1963
465.132	493.109	267.343	499.695	480.006	363.415	436.745	359.147	494.225	394.801	308.353	452.799	328.04
430.154	611.816	196.791	783.279	722.842	482.434	475.98	442.564	749.981	621.125	555.218	668.496	499.92
241.058	611.494	168.939	734.022	609.997	439.083	519.895	551.931	755.721	597.142	512.689	580.712	482.931
240.061	239.987	119.673	306.305	258.047	183.005	207.408	217.579	304.859	253.692	216.265	231.483	200.901
116.052	84.0784	28.8404	118.496	83.9245	60.4025	73.2547	70.7298	120.74	86.8248	81.2816	80.4653	75.7002
429.152	2287.34	555.554	2812.78	2461.04	1608.86	1713.15	1631.28	2958.81	2356.56	2073.92	2301.59	1840.82
239.06	1632.07	355.805	2074.14	1730.43	1193.98	1444.87	1519.39	2106.23	1729.63	1410.18	1679.98	1273.84
300.997	64.1143	61.972	295.521	60.4673	195.309	280.613	90.6786	402.815	211.017	357.289	161.437	644.446
383.14	582.581	417.058	769.584	817.53	584.719	510.173	459.433	1034.54	711.078	658.309	627.995	677.995
142.065	57.5563	20.3613	75.5186	51.8642	38.1571	40.3725	44.5154	71.7689	71.3084	50.8631	53.6411	49.5256
552.097	148.666	100.982	149.244	150.26	107.808	94.0841	88.2863	129.871	144.454	126.433	153.312	145.627
669.213	258.738	118.226	279.217	249.454	187.518	237.846	245.178	324.708	222.766	215.482	224.778	177.736
249.087	273.437	159.218	337.544	294.676	217.536	207.438	193.823	383.321	308.606	285.591	279.702	271.914
487.118	572.656	396.861	516.659	585.844	530.533	483.677	376.269	512.588	409.996	439.959	535.92	392.371
263.043	334.901	171.605	346.047	378.352	313.996	276.794	220.471	375.948	288.199	270.545	334.746	272.202
203.083	7075.72	2550.97	8543.69	6933.17	5050.57	4690.13	4424.75	8642.91	7130.24	6751.11	7052.28	6323.77
264.034	55.3632	32.6679	52.2888	49.4103	40.7239	40.3534	35.0584	64.6255	40.5259	41.6281	46.2373	45.9448
489.111	261.939	191.9	236.652	287.702	246.672	206.237	201.667	225.946	203.361	192.615	243.644	185.552
634.242	182.238	77.9108	270.164	220.768	159.751	186.967	205.5	240.644	241.376	186.423	221.431	142.672
488.116	182.733	125.899	157.813	204.659	192.527	133.277	120.037	154.301	141.191	125.534	181.485	133.708
701.164	200.503	85.334	191.069	187.231	127.366	152.928	140.53	161.512	144.341	146.539	196.208	143.567
204.085	923.554	331.841	1099.09	919.508	634.001	600.444	579.574	1131.14	900.058	871.886	895.666	801.861
467.129	335.671	261.333	387.037	577.314	275.474	238.192	275.876	371.007	235.811	279.29	552.07	290.296
491.11	178.966	137.521	367.301	221.066	204.067	314.044	251.463	486.591	332.257	291.054	188.804	355.584
205.088	108.187	56.8722	131.048	106.965	90.5931	78.336	73.5739	128.757	111.289	109.898	103.785	107.363
202.449	74.2642	25.5798	83.6649	63.8551	46.8151	50.3478	44.2007	88.2183	64.4246	79.7247	74.98	65.8077
238.996	59.0496	86.6478	66.4524	65.776	59.5481	87.7959	45.7418	99.4342	71.0209	134.371	87.7907	112.88
181.043	371.714	411.9	616.13	364.462	355.011	499.572	279.548	898.581	543.522	1270.71	574.06	1125.65
188.988	4176.01	721.34	1335.56	665.003	1032.49	1899.2	2092.77	3454.4	484.84	2063.59	3307.81	3176.38
188.4	39.4819	8.00366	14.4205	6.59028	12.3893	23.36	23.6433	36.0045	3.50281	21.6652	33.184	42.8835
109.031	65.6814	21.26	30.1031	18.8018	26.0677	29.8971	33.2912	53.3449	14.0705	34.4597	52.7349	48.7633
319.001	147.92	150.043	193.666	156.752	183.502	146.231	111.892	217.274	142.694	133.717	158.359	183.143
232.001	145.638	210.087	486.268	148.985	135.139	176.046	127.126	544.307	255.313	483.015	278.466	312.955
272.073	151.013	109.416	137.925	154.835	125.341	87.1938	59.9807	132.54	112.616	119.162	127.77	115.122
633.244	592.724	103.175	648.421	620.473	386.021	444.834	604.916	803.86	564.187	562.452	641.574	527.21
271.071	796.751	605.57	833.267	853.762	713.03	500.659	398.591	839.066	722.41	752.049	759.515	681.78
348.001	143.719	94.1083	150.372	140.086	103.625	106.504	72.5667	129.607	137.617	143.929	158.427	134.824
147.024	35.3032	54.8926	63.7186	65.6932	123.041	62.8248	173.303	143.685	299.587	103.998	200.641	270.457
412.131	337.04	483.629	298.328	324.718	283.125	202.866	137.371	276.737	346.452	215.662	313.29	247.085
259.128	1160.09	749.372	1265.66	1146.05	1747.5	1811.39	928.645	1273.8	1417.81	1120.51	1114.53	1181.15
329.008	188.847	152.033	163.083	165.794	163.555	129.774	86.7191	161.715	138.114	144.824	161.239	128.329
156.066	67.5464	117.388	112.121	86.8761	59.2024	59.9293	22.3259	143.665	109.928	270.514	123.196	169.01
411.127	1291.71	1740.56	1123.06	1144.1	1090.37	857.018	558.408	1153.77	1525.1	887.516	1274.76	818.405
435.027	152.544	177.722	174.5	99.1998	82.8139	99.1504	89.347	168.941	98.6741	163.325	134.582	184.581
614.309	488.209	659.535	783.309	997.07	318.636	182.302	601.683	612.287	1330.73	352.923	771.544	1135.58
260.131	182.592	157.603	224.006	224.709	312.924	284.742	137.391	193.513	218.586	166.767	177.84	183.466
743.841	34.2317	6.52792	39.8223	37.1592	28.1692	17.6276	34.6208	60.7279	45.7029	38.3675	43.3841	35.251
283.043	406.401	347.477	887.433	318.751	344.984	225.855	346.598	522.045	229.811	316.165	209.088	943.358
600.275	280.415	489.368	384.029	250.85	186.215	76.2787	187.208	212.304	216.752	173.706	277.332	172.068
286.006	147.646	139.143	207.515	90.3587	106.312	98.893	62.0241	328.766	182.049	280.382	266.342	208.732
222.076	231.039	426.412	754.248	189.777	201.124	292.571	244.417	831.96	464.194	644.137	415.598	540.669
842.292	191.175	518.17	250.054	196.13	137.879	87.8915	237.144	248.209	185.11	186.821	220.298	201.884
225.044	403.26	210.492	569.456	145.26	207.721	48.69	293.641	186.105	104.378	99.8668	105.19	591.956
371.099	1076.56	682.038	756.483	408.029	728.53	868.842	369.731	831.602	619.848	830.892	879.921	1091.68
845.349	526.482	66.5496	460.051	767.003	1050.31	1098.2	447.822	652.401	566.764	412.194	427.474	463.414
158.082	244.551	288.257	440.898	273.526	280.896	326.261	114.175	520.623	240.299	1597.58	381.476	1046.31
571.038	159.104	183.85	120.609	116.471	96.7894	84.3695	107.879	160.117	110.872	142.374	134.665	158.035
643.222	346.744	128.558	364.991	312.889	281.406	165.967	284.939	374.512	310.293	352.702	380.113	381.531
689.707	30.336	5.15287	15.8063	23.9225	20.433	16.9244	27.2611	27.6486	22.9498	25.9374	37.4483	23.4501
660.73	217.898	1.49076	153.019	185.23	135.322	85.0973	212.851	214.491	185.888	204.442	238.455	190.204
676.707	54.0076	2.37368	45.0087	41.4594	27.7904	15.8587	36.2431	40.3475	40.9185	59.0165	72.1857	45.8907
643.745	99.9991	2.84149	77.0998	89.3283	56.1329	34.5226	75.0452	94.4344	82.7073	100.866	111.287	99.2329
649.742	44.9957	2.12712	41.0904	34.9664	37.5408	19.1327	49.0661	48.3322	42.524	45.6083	53.697	44.1869
661.731	127.72	3.18367	98.6939	111.849	75.6275	44.1041	122.044	116.798	112.643	121.255	136.08	95.8861
672.719	56.3704	3.25707	45.6609	57.5896	37.7381	25.8782	59.8149	56.6768	51.3741	64.2134	73.1945	54.4447
632.252	1636.48	112.978	1375.07	1447.61	1046.74	529.159	1288.44	1650.91	1389.64	1517.84	1779.41	1782.37
642.743	402.357	2.7679	298.284	350.281	221.701	123.056	300.111	383.575	335.319	382.666	435.973	402.132
650.738	41.5174	1.53618	37.7866	32.5708	22.4929	19.9079	41.3388	45.9744	42.3813	40.9626	47.1606	39.98
631.752	2492.47	1.84228	2067.13	2086.56	1508.14	719.165	1950.44	2476.81	2100.57	2322.83	2688.43	2740.43
632.754	627.715	4.06414	512.026	511.292	383.218	176.16	493.369	603.883	531.532	596.9	691.338	708.862
671.722	101.828	2.94204	78.1128	97.1471	60.9032	47.1979	98.5385	95.651	91.4121	105.704	125.459	89.2989
799.857	33.667	2.93285	72.9234	142.886	70.9371	48.0223	31.2393	120.476	146.145	148.753	49.9848	71.2471
680.737	78.2794	5.31881	107.101	77.745	68.1539	37.2056	74.3263	97.1271	106.789	119.906	90.5098	105.077
182.048	260.881	143.523	234.222	280.528	264.244	100.742	108.18	228.157	196.033	226.138	231.326	248.2
245.103	1473.18	2060.7	3212.25	1093.94	1370.46	573.137	1097.76	1618.69	614.694	1057.6	634.448	2889.69
789.365	189.731	64.7134	475.936	738.707	399.249	228.158	200.208	679.547	852.75	769.769	303.476	447.532
434.126	434.551	367.006	312.347	337.161	193.389	309.073	110.093	577.17	158.049	216.219	329.778	274.287
788.87	193.203	18.1575	530.594	848.751	455.422	250.055	251.151	785.918	1008.51	901.984	349.115	533.088
789.874	92.9094	20.2343	209.635	348.457	181.297	105.596	97.166	298.673	397.609	367.478	140.653	214.405
433.117	1434.98	842.729	961.917	899.793	540.774	1007.8	311.942	2018.05	476.676	695.65	1056.21	855.099
138.056	393.36	218.722	238.349	346.043	338.885	67.7174	115.833	208.202	270.703	134.389	261.648	191.986
265.038	720.285	647.052	741.202	617.441	745.136	355.697	264.562	692.491	448.847	472.093	374.064	891.081
978.414	303.566	40.7306	374.113	193.593	610.674	392.95	209.244	547.591	361.735	297.92	236.936	301.293
977.922	220.925	1.67362	392.321	447.184	593.044	352.371	200.521	549.782	343.05	287.531	269.619	266.51
738.843	51.37	5.57884	191.193	280.273	161.906	124.417	32.2642	176.525	226.572	225.06	91.4687	115.2
977.909	290.884	1.67302	376.372	426.743	591.993	359.299	108.174	225.947	329.245	290.208	277.945	274.051
978.897	198.566	2.80782	280.101	315.816	475.451	265.331	124.661	408.783	296.205	211.476	178.988	187.324
979.876	111.893	2.06371	111.184	146.102	205.77	109.918	120.153	139.837	148.298	129.78	89.8761	88.6036
266.04	97.9956	93.9812	136.672	95.1577	106.959	54.9148	50.774	106.763	63.6154	83.6986	60.4287	149.496
927.386	396.531	6.20977	417.635	479.948	644.583	505.835	141.839	534.96	303.236	305.505	299.67	216.644
927.887	168.702	5.12111	194.265	240.774	269.756	204.273	74.7829	209.598	162.51	141.575	163.604	109.961
405.14	590.396	3153.15	698.349	917.86	562.765	355.311	138.378	365.718	257.242	220.384	651.028	343.601
956.88	115.253	2.52866	108.237	133.946	180.447	121.852	187.135	165.238	132.397	106.136	113.64	101.72
917.901	92.2366	3.77816	138.334	158.361	183.898	105.507	94.2543	145.833	128.355	71.706	66.2269	72.939
943.875	172.477	2.15127	113.434	168.708	222.993	155.754	64.4974	163.86	138.865	119.465	89.1882	67.732
937.878	216.873	0.88893	229.651	241.129	182.09	245.323	86.8546	273.615	205.91	144.679	162.831	105.758
928.897	202.504	3.07184	254.115	298.095	406.734	240.128	106.511	349.293	271.235	208.359	215.404	176.379
924.871	117.932	3.2514	158.499	237.985	205.564	185.589	62.4636	181.597	160.213	130.32	130.039	100.574
923.361	238.073	57.2501	248.324	330.6	360.85	246.676	117.436	302.297	281.643	235.03	250.753	166.129
929.891	126.524	3.78232	106.144	132.382	161.08	59.4453	41.9769	157.726	139.577	105.571	107.344	66.6053
923.867	283.507	4.78636	398.318	451.488	417.036	361.745	277.39	399.254	394.777	326.729	195.632	271.744
679.749	36.3984	5.06239	212.058	156.949	111.578	97.9298	25.0348	131.575	161.617	279.226	61.7673	76.7214
928.397	250.202	49.3497	279.929	391.015	436.488	326.465	142.234	380.573	328.244	232.781	247.915	181.558
895.093	105.327	76.3749	207.273	224.469	273.478	177.025	88.2781	222.921	188.051	136.505	136.18	123.96
924.365	274.221	60.2357	269.752	390.27	415.031	291.888	107.068	332.109	313.738	246.86	268.369	240.035
960.378	222.532	45.7179	188.513	346.525	184.985	204.387	153.704	321.763	352.219	264.301	185.332	259.358
944.875	169.285	1.94175	147.449	239.227	252.456	158.832	78.8032	229.579	237.571	178.769	157.676	99.5045
954.876	86.1358	5.17173	82.1465	118.187	188.435	69.8789	46.9507	121.009	69.8766	83.3222	72.392	53.4433
984.908	897.865	4.29897	1063.96	2577.63	108.965	177.803	1934.87	1084.81	5096.71	2839.45	3137.41	3110.77
894.08	247.606	62.7589	338.577	427.042	590.463	339.517	153.018	413.856	353.005	230.854	269.799	169.78
995.395	304.301	49.5774	286.525	663.451	88.804	78.5065	435.499	347.119	1033.12	715.606	831.117	721.856
946.894	248.212	4.80759	301.441	356.452	454.086	333.329	133.828	469.808	356.312	223.364	215.223	209.335
919.887	176.616	1.73171	196.141	260.854	272.429	230.332	94.2419	255.075	198.977	176.633	184.941	134.151
945.889	433.551	4.2404	533.849	739.728	895.073	694.594	292.62	836.732	661.565	441.07	381.56	425.512
917.396	283.965	10.8925	325.967	472.846	528.859	365.542	163.125	401.731	323.762	241.731	286.829	231.409
916.896	700.622	4.15985	836.173	1127.92	1407.6	938.91	432.475	1100.26	899.391	636.775	670.415	539.26
918.886	374.734	3.58388	399.879	485.691	599.311	395.452	162.585	493.779	386.897	362.927	343.068	259.013
934.872	207.636	2.07913	163.864	241.092	221.068	244.654	114.304	211.988	296.259	194.185	177.731	127.628
946.39	383.485	43.9986	526.317	615.779	790.312	644.388	264.251	715.534	616.808	400.384	337.712	403.233
994.9	326.049	0.621908	223.492	229.583	114.576	109.579	415.056	295.316	1044.84	781.685	801.98	702.982
983.906	1556.34	5.16812	1722.86	4035.75	125.954	310.071	3291.52	1670.95	8189.81	4513.41	5227.33	5102.74
984.407	1505.86	46.8173	1753.32	3972.2	176.635	244.854	3203.28	1814.34	8132.46	4434.04	5096.35	4947.86
894.567	220.583	1.86864	282.218	403.708	497.228	304.824	114.025	344.047	351.298	227.138	225.842	171.839
915.895	2282.06	4.26916	3156.19	4039.16	5424.86	3625.3	1549.18	4004.11	3189.2	2365.29	2435.81	1911.87
916.395	1497.16	15.8471	1891.92	2471.86	3302.12	2290.26	1005.4	2517.89	1989.91	1508.89	1445.46	1152.47
996.385	136.503	31.3586	372.471	246.321	166.784	131.805	169.702	204.504	390.524	246.476	338.144	245.375
896.908	17523.5	12.892	25076.9	33599.1	41545.9	24976.2	11319.8	32803.2	28305.7	19005.1	19365.4	16739.7
897.409	15953.9	64.3196	22405.3	30529.3	37428.3	22392	10542.8	32840.5	25653.8	17060.3	17669.7	15329.4
897.91	9008.26	4.48808	11727.6	15897.2	18791.3	12177.3	5484.91	15687.8	13424.4	8950.46	9384.09	7982.42
914.894	2877.99	3.61488	3539.27	4628.94	6176.61	4211.29	1966.85	4777.09	3625.85	2608.71	2832.78	2190.96
915.396	2521.95	54.6689	3382.41	4430.5	5856.64	3951.07	1855.11	4469.62	3467.4	2493.44	2636.12	2086.65
907.898	2499.91	1.8701	2927.47	3712.78	4325.6	3159.49	1347.82	3815.98	2759.02	2520.29	2400.47	1871.68
908.399	2214.64	53.2261	2738.53	3477.89	3945.14	3009.38	1241.7	3400.21	2526.7	2262.22	2222.27	1721.9
908.9	1207.08	2.14943	1423.41	1803.15	1965.54	1442.34	604.12	1890.51	1314.89	1164.26	1166.37	873.888
985.4	386.895	53.0873	489.874	1190.77	162.072	509.707	959.425	465.405	2356.91	1332.2	1556.89	1425.82
919.387	383.584	62.5285	363.369	532.516	638.702	469.078	182.208	523.56	360.298	358.863	362.206	259.539
898.394	3503.54	48.3206	5292.31	6845.12	10152.2	6678.93	2276.17	6779.12	5410.14	3768.96	4414.67	3289.16
995.901	244.59	3.33635	210.839	411.727	296.693	126.771	294.017	226.42	656.543	464.526	519.2	437.423
932.893	140.087	7.22708	162.448	220.193	307.364	213.39	102.337	185.032	184.366	126.015	130.177	96.1696
172.454	42.9023	104.721	31.2615	78.6888	9.95888	11.1718	73.5309	31.0534	136.539	90.484	99.4807	143.403
909.365	607.068	50.6608	764.343	893.976	1450.81	1158.37	326.786	884.294	669.874	561.191	722.359	443.466
293.103	1193.22	836.839	1236.47	1160.83	1564.89	1042.6	772.679	1459.31	1017.65	1284.17	1051.34	1339.83
174.987	196.017	596.672	168.948	286.307	89.1712	63.7743	333.102	163.328	734.606	504.106	561.566	764.004
173.995	245.157	818.871	200.504	411.701	71.4852	53.9443	484.406	174.183	992.238	689.013	766.12	957.502
898.864	1427.91	4.02327	2441.67	2482.48	4988.92	3601.2	887.337	2562.6	2220.54	1642.03	2098.75	1272.25
172.992	3066.44	10575.4	2613.22	5138.08	717.141	537.334	5874.44	2161.14	12923.9	8579.99	9486.77	12435.8
93.034	18.835	61.4482	25.5714	32.9869	11.8495	20.9778	36.5896	18.0526	76.4458	47.8478	54.6848	74.1354
910.814	53.4202	2.92608	121.986	115.394	207.231	167.099	39.9698	124.963	78.19	77.1461	108.184	58.4271
975.818	100.621	218.536	292.49	200.54	105.03	112.091	108.562	321.28	472.357	224.182	339.048	185.347
913.49	226.627	13.854	204.847	280.357	300.826	217.507	136.769	224.958	207.969	169.983	161.525	187.934
906.801	73.4723	4.85446	159.206	115.934	215.981	223.788	48.2314	159.491	256.713	91.3372	127.187	84.0976
974.815	203.651	156.463	426.169	639.272	267.684	305.986	361.89	326.795	1482.34	693.853	1078.99	549.738
912.489	468.422	20.8803	364.305	583.987	587.046	403.947	289.225	413.517	434.105	309.233	304.81	341.073
899.336	599.541	63.2561	1232.76	1070.84	2388.17	1758.86	422.444	1113.17	800.236	675.648	966.312	558.702
974.309	244.072	64.73	510.509	707.888	265.305	329.316	427.134	448.365	1671.76	800.341	1236.7	639.288
252.083	86.4676	130.841	159.472	79.9051	125.024	118.398	98.9695	268.559	154.09	187.011	110.275	211.107
975.313	170.243	52.8742	348.898	461.68	190.235	209.957	266.313	285.418	988.676	467	707.892	389.123
910.31	142.092	62.9918	231.801	228.966	472.647	379.37	82.9903	259.454	188.928	152.167	226.684	121.606
889.311	455.16	69.589	1047.82	810.419	2263.85	1628.82	313.287	928.898	709.031	508.141	899.343	416.614
482.178	427.384	297.024	265.333	464.605	495.309	110.566	287.486	348.163	316.686	100.353	298.674	237.505
591.539	32.8524	4.97105	87.2229	49.3929	193.033	91.0063	13.9754	75.8848	58.5563	47.0332	83.2221	35.5382
913.767	84.2761	9.05846	212.606	149.819	312.947	334.542	61.0272	145.786	143.349	117.154	202.299	87.9708
847.883	95.0056	2.08301	210.885	333.424	176.676	125.244	112.642	308.118	329.817	207.288	169.379	183.279
884.494	99.0043	28.6322	160.43	139.153	391.933	322.486	47.1049	138.929	115.302	80.1471	170.065	72.7258
888.811	1037.33	3.33294	2951.58	1902.62	5839.74	4064.87	792.555	2513.81	1651.93	1360.13	2410.95	1061.17
887.31	5043.22	63.0575	14133.8	9867.63	28984.6	20193.3	3727.59	12793	8444.14	6842.88	11550.5	5167.46
887.811	4264.12	7.33697	12128	8539.34	25883	17158.1	3218.23	11172.2	7393.07	5837.69	9845.11	4496.33
888.311	2471.63	83.4299	6866.08	4905.81	13817.4	9908.89	1927.66	6416.52	4178.68	3407.81	5585.78	2595.2
885.005	71.0297	36.6164	161.718	110.134	280.018	209.562	40.8555	115.251	91.1143	84.0769	138.907	75.873
914.274	158.101	56.3501	340.606	263.489	459.383	455.035	87.3048	297.029	231.402	184.562	316.388	147.634
889.811	129.745	2.62873	368.305	252.282	712.423	592.723	98.0862	303.716	215.442	158.686	308.509	121.982
847.381	294.942	174.909	584.945	952.262	610.863	442.415	344.792	834.329	805.687	618.583	497.128	546.785
846.379	753.028	69.9699	1296.81	2210.28	1114.32	586.108	832.72	2165.98	1883.52	1470.05	1126.7	1191.91
865.869	50.2838	2.58165	101.562	164.766	80.3824	66.6575	54.4275	165.875	164.403	96.3177	91.1879	86.5518
864.366	131.897	79.2888	222.268	358.025	172.71	137.848	151.931	342.986	285.56	223.491	172.655	192.749
857.874	93.1646	2.62703	155.166	291.812	94.2515	86.3593	78.3198	256.466	205.777	206.977	135.78	130.475
543.038	65.4237	234.679	96.6852	85.6823	124.501	101.415	68.9341	128.252	79.2093	118.005	82.6005	111.438
851.79	102.832	3.58163	459.565	362.442	351.023	351.915	78.0219	318.048	374.518	498.116	292.332	182.41
864.875	89.0419	8.46017	147.165	292.407	175.718	103.962	102.936	209.707	247.691	178.691	154.935	144.488
865.372	98.5471	69.4214	180.789	275.685	192.537	124.256	99.8541	234.004	220.556	191.404	135.723	145.34
857.371	124.822	59.6941	178.297	325.013	158.453	98.5327	114.485	343.989	283.906	231.491	204.708	170.315
846.884	531.965	1.46435	1114.04	1820.28	979.39	507.142	579.577	1715.34	1561.78	1230.97	951.275	1052.02
794.781	35.0258	3.12833	147.227	144.622	141.997	249.788	30.0122	120.23	151.046	233.227	95.9809	62.8928
852.794	53.5137	6.43566	204.226	149.28	173.871	166.274	31.8204	124.763	142.059	193.083	117.23	78.6073
794.273	115.497	119.394	259.092	280.876	276.802	334.877	86.5761	181.434	232.467	335.685	174.337	150.128
747.757	14.8044	6.83252	111.366	95.8358	99.783	118.484	11.7656	66.8979	46.2543	80.757	40.3207	37.479
852.294	133.568	82.9427	413.455	350.649	294.586	296.689	101.16	294.621	308.825	433.033	278.947	215.202
862.781	30.3738	7.00171	67.8598	58.0846	58.299	56.6327	16.8359	80.6376	60.6479	98.3336	55.2031	35.3194
736.762	79.8904	1.20472	641.799	535.86	495.718	557.443	53.7113	316.638	326.714	457.868	270.116	202.731
737.764	36.0313	8.46155	216.983	205.738	166.967	233.727	19.5251	83.0477	130.39	164.578	87.2774	66.6057
206.045	279.178	168.272	177.209	85.7821	168.904	164.496	99.3149	237.168	282.11	241.996	405.788	240.622
737.261	142.354	142.756	572.862	472.646	401.549	419.143	84.6308	324.083	311.824	374.539	265.449	221.208
234.083	69.6764	37.9576	74.3898	93.5461	91.0101	31.8344	48.1916	82.2702	152.216	39.5402	94.1794	55.3997
305.033	234.76	186.469	165.743	74.1441	79.6598	165.169	113.64	208.227	140.209	253.03	161.311	240.493
879.81	30.0717	12.1755	81.8533	154.941	221.4	230.548	67.0568	101.614	60.9076	51.9171	80.374	32.3561
341.088	1250.89	865.371	1087.28	412.928	508.358	770.505	493.984	1022.54	382.251	1354.38	1377.09	1372.75
295.046	463.465	470.561	442.039	335.777	456.029	170.948	201.001	248.981	216.347	214.872	103.929	727.048
129.056	2049.12	2457.47	1785.41	2278.52	1113.64	1609.23	2164.68	2244.7	1581.52	1692.73	2560.89	1156.66
879.305	102.66	74.7937	272.675	202.909	613.244	568.783	113.548	277	172.057	120.709	227.289	117.423
130.063	198.905	837.37	144.898	190.138	85.8324	126.647	166.287	135.229	173.054	123.966	198.332	84.6513
197.044	120.919	106.509	67.697	117.023	58.8557	99.3848	66.7256	89.4195	94.9273	69.0228	125.17	51.7164
442.261	65.8309	8.1644	75.3893	61.2381	55.9425	32.9584	51.8944	81.5447	71.4076	88.2283	81.9399	85.5953
878.806	195.524	10.5304	368.344	302.928	953.09	937.473	160.676	411.453	224.886	192.197	332.935	210.9
878.306	181.607	59.8254	499.521	376.916	1197.9	1178.4	263.485	557.765	345.201	248.169	436.337	212.206
137.025	180.189	229.451	220.906	182.763	229.062	165.722	166.951	239.039	187.427	228.391	244.829	248.17
476.205	329.232	220.894	340.933	370.357	429.075	279.249	165.843	372.346	305.577	354.359	366.876	316.259
440.244	855.75	95.335	860.637	856.027	841.471	598.856	286.226	883.972	818.499	1060.81	846.601	818.765
441.253	178.505	5.81204	178.565	165.571	144.613	111.697	55.9007	181.981	164.376	222.77	185.459	163.178
170.082	111.133	32.4732	86.1845	168.732	149.342	40.2323	75.8728	99.0114	190.403	32.4506	90.481	47.5468
172.065	274.75	584.439	484.097	400.755	479.61	446.462	180.046	457.878	365.656	258.732	310.562	226.62
541.028	178.27	281.333	213.658	153.403	132.687	93.3682	111.711	250.158	106.83	169.096	200.563	210.556
251.06	382.528	405.783	650.328	330.541	346.206	187.746	332.529	477.513	272.66	334.158	223.588	672.068
323.081	1240.22	1465.46	2019.75	1403.28	1298.26	577.696	1800.37	1429.92	888.973	995.752	709.464	1961.71
565.68	26.7518	50.6988	99.8565	151.664	46.6501	41.5891	10.3124	47.6612	118.182	141.497	45.4304	70.0714
303.016	101.766	118.738	190.766	73.9647	110.789	97.9546	148.88	237.932	165.182	262.077	87.2518	282.851
704.318	415.518	117.931	360.783	1041.67	259.143	148.224	741.755	532.739	478.562	124.179	451.599	253.234
151.04	89.2458	91.9841	171.955	69.22	98.7196	79.9641	120.755	198.844	177.144	245.607	185.724	216.513
785.227	283.721	464.744	309.822	376.418	467.742	472.303	215.774	352.202	244.698	189.79	200.158	224.957
218.042	56.3517	115.104	63.954	56.0094	66.0152	52.119	43.736	105.959	95.5532	174.497	91.1514	134.959
275.03	1878.89	757.573	1099.48	334.601	673.761	1311.25	776.747	1996.12	1101.87	3633.86	1229.07	2960.34
336.074	624.124	4731.43	4026.44	3220.17	181.626	126.132	168.989	475.227	2051.03	603.535	771.511	1262.89
276.029	252.021	109.576	121.569	56.0904	95.9045	179.101	90.324	264.257	137.762	469.938	171.75	376.963
277.027	200.658	88.2829	144.666	79.018	85.5537	127.856	97.3834	238.933	101.764	277.987	139.514	301.673
785.736	120.27	292.672	97.9413	156.5	188.716	228.135	45.8394	114.644	117.589	125.968	110.997	72.6495
297.005	205.912	166.017	107.975	31.2221	80.3277	190.961	77.361	221.403	120.394	393.822	165.934	241.991
784.731	232.874	744.799	244.069	363.168	500.747	507.723	127.08	341.71	310.632	217.048	232.371	185.337
159.067	559.235	759.016	1006.39	744.772	561.201	377.286	430.137	892.209	484.239	764.301	974.106	1075.82
160.063	68.5164	77.4131	98.7287	81.4585	57.7802	50.542	47.9283	95.622	47.0668	109.791	88.1444	98.3701
623.126	191.67	534.014	207.686	92.5689	164.212	312.522	172.255	314.579	174.612	363.367	297.686	247.105
624.126	70.0661	190.902	90.1061	61.0022	76.9774	114.404	97.9213	181.268	191.297	176.015	142.939	172.516
308.08	287.63	250.506	236.487	334.599	315.355	313.026	182.343	313.639	273.958	286.642	295.47	358.515
952.484	123.952	5.86358	116.851	165.605	192.535	130.892	83.2761	124.314	155.361	93.729	118.333	80.2282
623.694	24.7167	38.013	29.1893	51.9386	25.1414	34.3266	6.36667	11.1885	34.2992	31.574	19.7649	22.568
951.467	431.263	70.4116	397.889	608.843	708.013	445.694	281.461	538.928	501.109	322.186	376.501	264.132
579.036	108.282	451.585	179.052	147.582	76.8529	114.316	167.177	234.796	110.732	283.847	238.097	299.267
531.02	78.9655	282.779	97.3219	57.1915	64.9265	143.269	106.003	239.805	47.9563	109.975	88.6887	74.4143
247.024	350.973	129.392	183.817	89.4983	132.179	230.95	180.816	787.891	127.482	543.537	452.652	743.829
950.468	830.808	33.1099	738.294	1046.34	1199.55	839.669	520.437	938.847	917.433	603.305	683.989	508.565
580.009	33.9527	111.123	44.509	61.1285	24.1759	34.4112	44.3689	69.4899	29.1766	71.8261	61.8692	74.61
510.05	292.613	1217.14	459.853	185.582	202.548	445.28	460.239	946.264	229.224	425.121	379.228	373.649
509.043	995.864	4616.88	1639.82	582.374	780.862	1818.64	1752.01	3573.65	657.718	1415.36	1330.79	1064.83
559.042	136.71	528.811	200.469	201.454	113.104	97.548	179.932	270.184	121.024	294.738	290.338	340.13
254.519	48.2637	223.978	77.2617	23.6463	42.4274	91.1944	61.8419	176.942	43.0129	54.5725	63.3452	38.2681
254.019	218.757	913.369	330.722	132.125	166.489	356.225	265.504	740.6	162.514	275.923	261.046	187.479
558.035	222.138	1005.69	420.665	357.364	165.234	205.477	354.873	570.38	218.877	608.342	540.785	600.962
557.024	785.292	3643.86	1518.38	1340.87	701.712	702.069	1370.07	2019.75	790.928	2333.09	2072.47	2211.82
179.055	471.945	409.782	453.9	344.958	317.586	303.472	245.891	568.392	323.421	483.889	546.88	566.256
646.815	44.1146	7.32686	40.1364	26.8778	30.9501	22.836	18.7204	35.3904	53.7958	57.0029	51.8846	42.3608
621.115	190.541	565.262	323.85	176.886	227.671	398.869	314.728	513.948	234.307	444.654	313.935	357.892
364.118	761.245	473.79	574.343	712.471	603.952	137.618	208.29	441.544	542.284	256.747	591.287	384.378
165.013	301.412	325.923	376.966	411.101	211.691	179.304	181.902	355.172	188.247	332.075	520.17	573.272
178.051	2461.34	904.486	1529.01	807.069	742.775	1300.73	958.905	2475.14	909.56	2089.25	3134.39	2798.37
775.243	523.885	973.441	526.148	749.697	587.636	533.773	199.017	579.779	586.769	464.532	443.67	503.097
363.12	2537.86	1690.23	2068.95	2664.78	2229.16	487.984	815.475	1607.33	2235.52	944.83	1990.93	1338.52
774.241	1985.36	4841.65	2277.56	3379.75	2592.48	2374.79	825.236	2377.97	2832.59	2124.82	1912.33	2129.43
223.063	601.295	707.371	1071.76	456.142	433.984	186.776	496.444	768.999	362.291	464.756	298.243	1147.05
774.741	1045.57	2448.12	1081.53	1724.49	1269.78	1185.19	399.8	1241.18	1399.66	1068.28	932.809	1064.17
266.996	92.5337	65.6583	59.596	56.0772	37.537	43.5202	65.896	253.511	41.0084	251.229	155.104	217.154
259.017	341.789	457.45	582.078	358.496	347.044	302.542	905.49	1055.1	491.979	912.358	452.338	1372.44
773.739	2679.58	6617.87	2823.53	4645.56	3550.21	3138.42	1098.84	3164	3922.78	2865.14	2394.06	2790.3
134.059	66.7394	33.7719	45.8576	28.3487	40.5732	43.3461	32.8589	81.5157	44.038	52.5965	73.4248	63.6646
847.207	157.114	347.448	184.413	210.413	139.916	272.116	137.215	177.996	142.24	130.67	207.414	140.386
921.303	277.199	422.231	485.417	308.957	457.331	215.21	125.236	335.72	268.522	143.943	175.956	279.064
511.058	403.337	5978.36	381.152	155.498	220.993	363.044	374.009	896.642	165.748	327.365	415.445	381.742
991.333	1156.09	887.357	789.102	1140.98	1572.32	285.395	237.986	685.19	1116.32	269.681	753.217	424.577
609.139	268.674	2285.76	129.425	83.1225	69.0638	300.286	183.597	387.097	173.024	302.422	332.166	372.34
612.686	20.925	83.9075	31.3906	44.6631	15.6645	10.6991	1.29532	31.4945	44.7613	81.211	17.0355	14.0864
775.742	95.0887	358.114	128.879	236.196	164.94	172.631	49.4758	147.33	181.954	150.101	99.2795	152.942
992.346	925.567	573.069	712.413	796.282	1062.66	192.687	195.981	444.684	794.188	204.263	542.405	366.481
246.02	347.26	114.806	191.656	152.17	97.0672	161.144	216.966	802.363	161.917	715.001	527.876	886.353
601.196	798.413	2250.79	1701.68	2847.03	755.7	530.41	293.473	983.224	2516.55	2606.18	734.848	1444.13
224.002	53.3245	32.2625	61.199	42.9276	25.9557	38.3112	45.7654	107.496	41.5385	59.1917	96.4986	65.1914
921.811	251.592	324.033	405.574	194.81	225.713	107.969	74.0134	261.282	167.845	118.632	117.65	201.359
991.846	1229.48	773.896	883.924	1158.17	1404.94	343.299	263.998	687.027	1015.16	275.473	750.597	391.707
836.219	875.202	831.095	869.139	908.01	671.537	567.081	189.394	669.659	787.47	482.062	767.479	575.93
932.271	2428	497.824	957.026	1163.21	539.575	732.923	687.527	6172.56	1041.59	2432.24	2927.66	2636.08
932.775	1998.34	411.964	824.068	870.977	548.972	631.916	538.194	5451.14	951.702	2171.37	2505.13	2299.17
858.246	549.706	880.484	582.345	685.221	645.605	383.913	207.09	614.927	702.819	423.414	577.392	573.26
601.7	372.394	1160.99	911.703	1570.95	363.078	261.19	92.6836	448.498	1414.59	1398.69	352.482	712.88
807.201	741.664	1055.38	737.108	905.885	1052.89	682.309	250.105	673.863	697.826	340.883	677.288	472.887
539.169	1181.78	1369.51	922.332	1351.61	1815.93	937.553	308.283	1127.08	1145.32	507.678	911.137	914.187
933.777	714.899	140.453	339.247	343.592	190.152	167.559	213.381	1475.79	386.796	637.031	811.886	718.234
602.196	352.131	723.737	524.95	755.05	235.895	144.533	137.973	383.778	743.056	781.239	288.896	530.894
602.7	74.7495	151.57	136.294	240.271	52.0447	51.2932	11.7117	75.9663	222.059	206.077	47.6919	141.737
807.703	352.379	484.103	308.318	423.754	539.004	345.825	100.573	372.224	453.396	173.732	400.911	235.484
821.25	1492.34	2804.6	1740.75	1942.23	1753.3	1196.79	384.853	1514.05	1443.65	892.863	1462.37	847.821
207.034	220.473	369.4	463.714	161.111	250.023	116.426	170.926	301.425	167.599	170.272	147.371	370.204
540.498	65.6678	58.895	49.8666	41.0569	91.8454	41.8949	12.6179	50.0544	48.1691	30.294	51.2621	41.9145
832.251	321.191	489.249	374.943	350.629	374.807	285.408	99.6078	316.741	361.827	229.356	281.927	206.534
809.259	71575.8	87959.1	60825.2	78672.9	93861.6	60064.6	19854.4	63791.3	72954.5	30027.7	57693.8	42361.6
809.76	55049.8	69707.2	45716.4	73508.9	71440	45810.5	15131.3	48816.1	56194.6	22766.8	43270.5	34432.5
810.261	29229.8	36040.1	24172.7	32026.1	37730	24322.3	8145	26479	29239	12071.6	23261.7	17602.3
810.761	11694.9	14650.1	9717.63	12900.6	15529.6	9759.77	3244.97	10846.4	11747.5	4974.51	9387.57	7161.85
806.7	899.138	1244.03	859.812	1009.63	1359.07	874.635	238.679	840.61	948.989	405.134	719.387	517.936
835.714	769.245	864.223	671.371	808.945	683.514	552.789	186.072	573.983	783.9	352.38	778.836	416.798
539.504	807.008	838.71	519.699	751.144	1300.5	623.278	151.291	616.766	819.866	291.794	628.397	506.814
539.838	433.914	468.935	289.74	438.082	720.233	376.532	76.7583	365.728	414.762	146.86	297.433	247.69
811.262	4002.51	5349.52	3235.22	4341.04	5425.91	3678.22	1101.26	3552.57	3988.82	1770.62	3196.06	2365.48
245.012	2157.74	485.927	1016.8	813.02	724.772	878.236	1678.07	6760.93	1005	5608.91	3594.64	6943.12
821.751	691.951	1090.77	746.296	762.176	792.442	590.723	133.723	619.707	705.699	365.629	686.482	443.58
811.762	1234.51	1575.4	946.697	1267.42	1637.25	1200.84	351.168	973.179	1236.26	505.183	936.792	686.696
828.248	435.935	352.023	438.482	358.926	416.701	355.132	171.366	358.797	467.02	301.608	372.6	273.407
858.758	457.362	663.642	499.241	472.261	530.728	368.73	159.426	556.002	549.198	292.278	448.749	388.956
822.247	385.155	526.547	394.843	439.393	505.24	389.535	145.421	394.376	306.657	217.433	369.163	246.236
917.774	689.969	361.971	540.129	280.577	238.638	263.713	896.113	765.057	1032.67	1059.77	1233.08	1725.22
917.267	1486.25	948.095	831.514	470.324	275.359	311.696	2335.61	1816.62	2357.38	2513.66	3152.87	4216.31
942.719	129.915	113.43	66.1746	41.66	14.0631	28.0855	98.0743	121.371	159.968	179.005	211.611	309.685
831.764	458.927	824.815	485.802	598.889	473.714	481.419	111.779	442.074	466.34	377.914	444.529	274.255
880.743	195.936	366.744	205.144	219.86	100.76	53.5193	163.183	296.133	525.632	724.662	379.89	534.507
916.768	3035.58	1889.17	1292.87	655.361	237.578	151.827	4535.35	3106.21	4934.49	5090.15	6494.25	8973.69
812.258	399.86	640.512	408.18	534.05	567.817	520.304	162.25	396.917	420.142	225.54	357.262	308.254
946.274	133.102	281.521	298.037	170.86	125.828	98.127	102.304	362.105	217.768	182.794	200.118	264.357
916.267	4828.27	2943.39	2090.19	1101.26	403.634	297.589	7132.8	5504.7	7883.26	7966.78	10226.8	13921.2
813.725	158.515	198.962	143.799	207.136	182.743	148.8	59.1513	151.669	206.867	106.095	114.058	125.042
915.764	5652.33	3248.16	2421.61	1121.04	294.392	316.248	8268.41	5954.95	8858.99	9244.38	11498.8	16231.3
809.631	177.051	210.015	119.226	166.174	170.621	186.766	44.8933	137.593	226.845	93.8102	193.822	136.975
455.11	880.877	1787.47	1069.32	797.88	1791.16	538.094	1353.73	1466.16	763.02	680.516	815.017	1151.64
880.247	193.645	408.064	274.878	141.66	78.9855	56.8527	179.376	349.977	586.833	968.67	449.673	714.759
871.723	73.7124	197.067	60.0526	91.5919	48.9192	62.2622	28.6973	102.969	173.178	299.65	101.594	215.675
463.088	266.115	412.286	471.02	220.697	365.635	261.703	339.243	645.214	350.504	541.859	329.744	529.158
881.758	93.5347	163.656	137.029	120.718	49.7265	45.102	59.8208	122.033	153.089	271.373	111.741	154.687
500.134	209.638	413.051	310.751	189.449	138.748	72.3139	248.195	436.586	159.07	390.961	277.383	569.029
812.76	178.42	202.946	125.038	200.442	246.133	211.757	56.8105	165.909	204.013	105.569	168.43	110.468
822.742	311.359	504.145	252.603	266.273	303.213	270.72	109.5	324.262	399.707	601.28	311.431	380.278
831.281	879.732	1189.07	790.686	867.837	1063.3	757.14	283.734	802.786	734.706	686.376	842.375	616.339
242.998	453.301	98.0863	282.126	166.958	220.862	341.934	453.388	1002.18	487.076	823.862	578.253	722.422
273.044	1005.12	2620.68	2161.31	760.365	813.19	858.902	1087.54	3166.77	1381.54	2886.63	1174.33	2722.2
810.896	307.162	181.07	199.64	418.868	267.823	368.034	120.184	310.449	354.56	139.603	268.854	166.946
979.862	235.058	329.19	324.963	290.216	295.509	110.474	106.393	238.38	154.533	141.432	201.42	205.297
711.313	481.582	162.225	706.849	967.329	414.059	265.3	260.431	607.257	762.849	632.734	500.656	651.157
717.73	80.1932	353.543	81.7283	203.793	63.6502	93.3937	14.6454	83.8543	148.508	171.562	79.2297	102.939
211.342	101.346	91.3267	65.389	27.9569	53.0853	23.6952	173.63	136.771	171.324	290.263	174.646	306.417
820.814	5389.48	478.382	3786.6	6099.18	5166.34	3114.98	1536.81	3909.28	4511.67	2485.15	4021.66	2009.13
717.229	262.795	967.389	410.777	554.242	249.745	241.998	132.412	351.545	418.787	524.58	333.966	374.276
128.656	42.551	28.8013	24.3918	50.6734	46.1434	36.9932	34.567	37.2422	55.6538	29.3581	44.004	9.8461
716.225	615.934	2647.81	849	1530.1	567.127	655.519	213.073	765.978	1255.23	1350.2	679.977	941.629
710.819	600.896	0.759174	812.703	1071.58	570.356	286.895	267.26	737.811	1006.76	825.566	580.994	795.04
711.822	194.346	3.01485	257.787	375.393	202.865	108.807	99.3046	257.491	342.3	239.188	188.436	239.423
940.341	258.093	183.246	312.319	359.473	235.991	143.849	111.771	277.739	170.644	155.588	271.733	199.408
213.007	817.594	770.185	582.913	308.207	339.09	193.41	1606.95	1370.06	1315.27	2909.43	1685.26	3052.96
214.001	479.569	456.165	321.339	213.795	184.327	137.693	883.43	800.761	794.395	1689.33	962.415	1758.2
716.727	430.022	1771.17	526.881	959.988	373.623	393.874	128.952	405.328	796.401	893.936	387.405	554.697
899.88	904.228	41.87	696.838	738.409	892.724	505.93	308.385	574.883	553.212	303.843	529.472	517.768
83.8491	18.7409	7.63687	15.7093	24.9272	33.1749	27.7232	15.2141	23.3724	19.8116	7.32765	20.2936	17.4428
993.872	277.034	208.518	270.289	282.113	290.716	133.021	102.595	225.055	229.098	148.758	208.51	197.537
907.758	66.49	150.061	70.0485	47.2994	112.783	47.9875	92.4961	184.692	167.114	132.368	141.713	117.991
765.22	168.549	668.196	275.889	306.402	123.023	177.966	104.995	327.436	386.782	662.844	260.855	531.029
986.868	263.595	217.434	302.25	301.603	259.78	180.737	136.702	273.792	300.117	98.6442	343.943	281.211
212.002	7116.49	6851.72	4807.63	2709.89	2839.22	1576.51	15057.2	12591.1	12566.2	27218.3	15799.7	28643.8
997.37	276.733	371.441	375.645	356.821	313.765	214.856	143.285	330.227	286.574	192.49	301.549	248.379
953.349	342.252	280.348	379.74	279.113	296.19	162.628	152.801	299.979	231.867	273.77	319.994	259.414
660.27	355.206	550.016	506.238	646.905	377.368	295.055	149.467	354.509	448.78	424.533	307.408	409.778
907.263	146.067	277.406	162.061	85.2746	123.066	89.6196	141.365	339.15	287.799	225.878	259.196	307.301
63.3482	30.1741	8.48281	25.4904	26.2769	41.9779	31.1785	17.9336	19.8156	27.1841	6.76538	20.3071	23.5584
765.723	79.9008	351.158	123.114	169.332	81.0452	112.661	40.5337	196.329	259.078	412.285	171.192	344.364
244.005	75.402	203.584	76.4194	59.6951	64.1769	57.1334	81.5289	164.402	117.625	137.251	135.396	148.449
890.81	227.596	98.8357	190.652	268.85	231.904	257.049	83.0155	223.79	241.071	124.349	166.42	140.103
545.568	91.7998	12.6855	31.8096	89.7096	118.082	46.0863	8.03038	36.0308	43.684	13.7164	44.5101	33.1285
660.796	174.911	7.92367	260.633	333.388	153.804	100.18	45.9921	187.153	233.919	214.618	151.47	188.366
965.858	335.326	229.145	343.442	316.54	298.486	134.026	136.77	284.945	210.091	203.678	236.704	271.504
998.371	295.991	308.622	268.455	345.775	311.944	165.957	115.501	317.979	238.244	141.825	208.245	236.482
659.212	602.751	2803.41	1412.39	2012.49	857.547	972.754	206.234	843.258	1262.95	1337.47	682.478	1407.41
985.895	433.184	184.145	500.306	424.06	514.686	452.204	335.709	529.892	552.664	285.07	466.356	581.101
658.711	915.22	4038.77	2148.12	3263.1	1217.34	1437.48	224.224	1209.01	1875.7	1960.39	943.375	1887.19
659.713	250.046	1199.29	654.392	943.315	399.524	419.778	65.5975	397.947	570.855	568.284	357.76	575.108
941.865	603.741	143.829	291.474	300.874	727.206	615.061	157.068	632.344	366.886	461.799	552.043	448.436
990.878	259.381	189.066	260.851	250.799	275.573	147.536	93.4874	250.653	214.984	129.193	195.564	256.192
985.713	74.0707	14.176	94.2778	221.646	114.467	134.629	28.0247	32.7495	153.433	81.1914	66.0687	90.9122
964.873	234.316	146.889	225.954	243.768	197.501	125.026	112.377	257.856	70.0419	181.135	163.865	224.016
982.869	232.616	206.272	272.735	259.123	234.104	134.344	111.723	232.316	248.262	142.628	184.04	200.662
952.863	266.851	86.7918	262.251	112.76	289.565	168.805	118.866	211.766	129.169	229.214	271.336	212.445
966.362	320.629	205.214	379.515	340.627	333.821	166.585	131.744	316.882	223.332	238.205	235.017	298.858
925.361	9832.4	136.306	4279.82	4417.94	4361.7	2617.43	6915.03	9196.74	13647	10166.8	10390.7	9201.37
925.863	8957.32	64.3415	4150.23	4394.04	4121.92	2547.21	6455.24	8929.75	12733.6	9707.23	9929.55	8716.86
942.865	380.327	103.259	281.242	159.301	475.072	378.361	174.085	516.109	129.105	348.273	404.52	372.956
989.877	304.318	170.694	277.731	290.444	302.78	163.431	86.7789	245.464	227.4	149.698	193.344	189.293
978.883	196.807	223.2	326.778	349.811	269.373	268.273	125.567	212.067	196.364	153.746	236.12	272.445
952.854	275.355	85.6961	262.365	219.055	132.962	68.7873	109.746	209.243	239.087	229.214	269.513	213.389
962.887	226.921	134.656	301.56	315.877	283.659	184.339	95.8061	227.867	81.5947	113.251	174.152	239.39
836.813	1700.56	474.61	1499.53	1744.15	2216.04	1254.42	601.304	1155.08	1300.82	845.369	1447.41	1079.72
968.873	218.073	168.553	230.5	127.896	250.652	137.461	91.8392	202.288	228.948	117.544	186.752	204.388
999.884	252.729	214.892	303.116	307.423	256.41	120.014	132.413	211.604	134.266	120.623	207.11	196.441
926.364	5326.55	89.8796	2347.55	2393.49	2353.45	1423.65	3885.9	5353.95	7476.1	5945.21	5887.99	5400.57
980.879	232.014	205.895	303.526	241.641	281.139	163.746	97.3028	267.02	197.331	135.572	210.589	232.605
955.876	95.1405	108.218	296.223	345.533	260.235	337.152	136.176	326.124	350.66	293.549	303.142	309.235
959.871	211.689	109.172	215.354	252.225	212.624	91.8067	85.0515	178.089	191.943	120.771	210.317	162.341
947.842	253.118	118.398	213.837	240.299	316.21	120.781	138.943	287.123	288.85	243.511	239.131	248.981
846.794	384.456	159.058	249.169	339.561	354.385	218.612	75.2204	220.233	334.26	231.53	370.376	253.663
968.374	279.337	240.359	277.04	324.909	205.546	175.743	123.272	257.405	136.476	154.39	225.402	270.991
847.8	389.391	163.505	343.304	360.642	401.564	308.977	131.676	291.903	378.235	256.741	333.616	231.252
820.358	13173.9	97.8254	8360.29	14483.7	15968.8	9463.97	4428.98	10608.3	9943.22	5077.21	8953.47	6390.94
969.374	256.669	178.322	274.138	262.639	251.909	135.839	130.844	269.221	186.852	154.654	261.474	203.063
936.854	651.696	58.9136	390.993	336.445	394.561	245.596	420.253	709.874	872.75	1059.27	855.776	720.301
958.86	168.356	97.6959	231.706	264.8	155.63	118.722	86.5253	195.162	208.173	153.856	190.251	208.166
998.889	224.179	216.414	304.984	302.862	298.869	148.547	101.038	261.282	223.088	142.973	187.478	248.897
950.865	178.167	129.004	227.273	217.438	204.768	115.261	65.3958	204.963	160.505	113.79	165.468	179.137
956.866	250.332	159.679	336.164	303.567	254.084	230.494	176.298	366.666	375.853	259.834	252.665	304.61
818.857	77668.5	81.4139	55644.7	81932.9	102184	64003.8	27340	52071.6	62405.3	33901.1	61022.4	43386.6
819.358	63656.9	164.354	46832.4	68519	85015.8	52622.2	22554.7	43444.6	54989.7	28105.4	50256	36306
819.859	31276.4	56.3075	22810.8	33346.7	42288.4	26007.9	11271.5	21709.7	25560.4	14005.1	24595.8	17465
996.886	255.005	124.632	328.863	279.36	282.607	192.192	124.937	119.036	199.754	135.246	252.862	233.804
823.266	550.378	571.308	402.757	431.641	680.998	324.444	205.326	388.892	417.481	524.21	503.498	513.516
816.265	1048.76	259.248	904.06	1204.35	1675.82	1060.14	425.711	852.035	770.634	543.149	922.568	705.865
942.361	590.35	174.06	398.568	451.538	742.773	568.4	341.274	722.858	390.369	508.303	635.53	570.113
816.764	901.726	138.826	608.855	971.414	1203.09	841.452	280.555	688.021	730.353	390.252	720.189	493.278
976.88	280.804	171.446	283.877	282.715	254.306	156.587	110.092	270.671	241.942	152.188	213.857	193.358
963.381	305.555	195.139	332.174	339.872	305.871	163.172	137.094	281.991	240.156	151.816	222.285	262.246
982.362	275.606	260.045	289.54	300.389	273.76	170.538	133.537	284.101	222.679	194.986	252.342	249.484
939.87	243.341	94.6937	262.534	305.694	233.243	209.806	98.7188	209.426	220.814	134.696	260.65	160.459
960.873	249.642	136.173	240.789	259.568	197.273	112.006	73.784	162.805	199.868	135.009	200.774	178.34
967.366	242.06	268.963	331.234	342.794	291.563	254.73	134.723	311.655	298.56	166.263	239.438	292.221
826.861	139.061	13.7351	73.1178	178.224	239.494	162.765	37.3598	129.002	115.297	66.7634	116.457	55.3239
937.862	221.246	128.044	193.179	193.092	381.748	105.76	135.965	264.861	299.484	290.284	362.739	254.644
837.321	1251.06	351.046	1242.83	956.528	1663.95	1100.87	398.275	961.189	1005.09	682.581	1032.16	863.96
988.887	294.752	173.657	352.114	323.811	353.922	168.502	126.827	248.641	199.588	169.773	256.881	243.23
936.35	695.9	177.481	448.332	436.581	476.386	268.465	482.575	781.685	1011.32	1191.12	949.954	757.653
937.349	372.46	121.441	301.537	262.865	347.613	163.395	299.379	439.621	610.834	651.881	491.047	486.215
817.281	622.06	232.951	547.376	693.755	836.227	457.237	318.218	650.245	723.715	606.574	589.378	652.542
961.871	189.431	163.798	216.091	224.976	173.39	149.608	87.7751	153.94	187.802	150.526	145.682	160.071
966.872	341.689	114.353	364.024	342.546	290.738	239.004	152.121	321.145	297.771	167.582	264.815	266.012
976.364	266.187	247.712	326.347	313.979	245.56	153.797	165.464	264.014	292.548	143.617	229.134	232.676
867.842	830.436	21.311	662.328	681.735	910.703	663.707	280.308	619.267	734.545	461.346	585.688	614.331
957.858	193.445	140.977	209.896	225.346	172.694	175.779	110.044	236.224	236.582	135.715	223.351	208.627
838.304	1584.53	1032.68	1237.65	1533.7	2319.28	1734.66	567.876	1102.38	1307.33	840.008	1312.51	1031.31
967.884	318.474	160.431	309.448	275.782	313.07	201.479	137.78	225.647	226.746	59.107	207.424	211.377
868.342	779.719	108.07	615.5	678.434	817.299	603.931	249.216	550.899	554.829	384.281	508.559	523.239
969.885	232.866	115.257	265.527	279.689	205.277	130.381	117.793	204.5	194.17	125.44	165.787	192.096
845.814	785.782	54.8706	482.255	696.92	674.062	493.738	178.016	314.646	608.41	505.141	805.603	493.461
837.833	1158.24	116.865	1085.23	1464.27	1652.85	1072.38	553.259	1032.72	1212.72	800.364	1217.4	895.543
868.845	436.911	15.1852	324.452	422.592	529.9	310.972	134.912	307.078	399.965	216.261	294.403	269.536
864.794	123.336	78.7039	84.8891	147.9	245.195	94.5919	46.1371	84.7792	120.486	92.2586	156.511	60.4738
848.304	307.985	167.786	286.388	351.53	324.484	249.049	122.998	253.029	309.428	189.053	285.628	236.443
850.847	252.748	14.7384	162.342	240.773	222.521	149.757	84.5201	155.305	179.095	118.734	236.032	136.397
938.353	272.687	207.935	322.073	287.767	288.471	237.671	202.489	312.155	337.831	226.993	312.563	300.689
949.874	191.218	138.161	232.052	247.101	229.375	176.41	93.0696	174.597	215.554	138.329	194.627	174.489
974.889	254.576	17.8505	267.272	203.657	337.987	131.207	124.624	281.713	260.567	174.077	175.534	405.955
848.821	267.741	28.2691	225.7	288.728	254.09	210.844	94.7653	232.339	259.993	193.993	269.71	158.366
973.882	231.95	159.792	313.314	244.204	212.691	153.19	113.923	238.818	211.608	160.81	218.259	302.23
845.309	537.381	150.376	488.884	547.553	549.741	423.617	178.688	383.118	520.91	368.093	596.658	427.213
829.847	4052.17	48.2576	3263.56	4453.91	4571.7	3482.17	1350.7	3238.93	3311.79	2673.46	3899.99	2583.94
830.348	3336.98	169.782	2824	3797.77	3635.99	2768.26	1189.85	2678.63	2692.52	2237.11	3217.23	2139.52
830.849	1712.47	87.8292	1312.47	1914.76	1809.4	1440.78	558.832	1392.45	1422.44	1141.28	1658	1043.07
846.312	514.369	128.625	460.864	497.418	469.679	391.907	143.323	398.973	441.378	348.717	533.005	387.594
975.397	223.344	68.6687	249.602	223.615	285.501	129.825	132.982	208.621	234.497	158.815	185.175	231.016
974.391	241.58	60.9354	213.406	248.925	185.893	126.078	131.742	218.527	146.311	150.851	229.639	217.121
332.129	505.291	874.308	898.967	649.329	583.247	380.863	489.438	877.035	505.686	641.442	456.716	848.411
575.751	60.4998	8.88784	100.077	111.193	87.289	29.7574	55.7584	169.045	94.0662	74.5855	84.8699	48.5567
823.768	330.979	278.385	237.243	277.626	501.017	174.711	117.243	189.636	271.501	383.584	300.327	322.07
863.811	141.638	20.7679	113.32	185.11	148.249	116.197	46.3164	105.425	139.386	90.1684	145.664	106.185
840.838	605.979	14.3231	483.817	601.005	638.529	521.52	177.627	404.503	581.89	409.799	614.694	329.082
841.843	220.77	12.7465	187.349	266.388	312.069	253.876	73.8983	367.644	198.33	220.401	315.148	155.102
841.337	552.487	124.2	468.301	488.945	515.37	492.847	211.886	555.702	454.258	382.317	527.558	373.585
866.837	109.842	34.3288	70.0715	106.51	146.11	136.81	27.7727	55.5578	129.314	60.2926	79.5724	59.4943
938.377	254.218	185.043	311.472	260.944	269.823	230.169	166.365	298.556	344.612	127.856	284.637	277.69
939.366	291.15	200.19	295.088	319.614	290.81	179.592	124.174	253.672	242.177	148.052	346.148	218.997
595.772	120.446	0	102.482	219.264	90.558	60.227	31.6486	99.6617	163.221	115.638	80.1491	100.059
938.885	206.812	113.338	291.36	256.82	258.032	250.447	114.535	139.26	291.627	62.0949	202.262	274.645
801.758	349.533	452.378	289.084	585.908	704.663	731.266	179.592	370.24	419.762	199.903	321.344	266.918
800.754	1727.82	2458.62	1470.48	2386.39	3333.54	3545.1	918.891	1951.18	1909.03	892.671	1540.88	1232.62
270.001	158.042	211.091	262.828	97.7417	72.7985	67.0374	108.744	230.07	124.784	267.513	246.378	271.168
216.094	195.39	248.686	343.824	132.118	176.427	90.1509	169.45	270.615	124.008	184.991	116.55	337.404
800.253	2233.32	3331.44	2039.71	3290.12	4384.49	4842.69	1378.15	2753.56	2456.9	1245.42	2171.92	1786.69
764.735	90.9556	161.958	85.6336	173.393	137.959	215.176	67.0782	83.0333	122.706	113.877	71.7062	91.5286
874.836	368.077	14.7455	93.9775	249.612	336.579	257.938	251.737	309.285	950.325	392.385	366.675	334.91
801.255	984.164	1479.64	925.193	1456.45	1761.98	1938.98	561.588	1181.95	1072	573.339	914.361	803.644
769.835	1039.98	16.6756	568.937	1033.87	890.428	693.121	336.306	609.52	991.741	466.73	720.203	529.374
765.907	86.1789	5.37249	61.7726	102.843	97.1757	72.9676	31.1252	77.6317	88.6445	63.471	75.427	53.8282
768.833	5696.45	3.94081	3693.82	6991.23	5784.43	4629.74	2206.85	4357.89	6601.14	3077.1	4795.5	3382.46
769.332	2706.2	168.091	1836.64	3341.16	2737.63	2158.47	1095.19	2166.6	3236.09	1510.75	2221.53	1705.06
768.332	7454.55	160.22	4823.92	9087.94	7273.84	5634.67	2767.9	5535.28	8247.41	4033.66	6085.75	4290.71
779.824	615.798	0.522027	373.777	790.662	573.878	588.373	226.995	495.444	683.064	417.155	570.047	308.576
885.827	94.4358	15.9552	40.163	95.4389	120.261	63.0581	42.8163	79.6617	186.87	74.5396	99.9977	62.0781
875.847	544.565	20.2996	231.289	401.562	722.055	184.911	200.167	238.931	518.959	209.76	360.218	245.252
421.131	691.264	2165.02	730.012	984.535	570.126	269.416	394.551	895.783	646.36	706.258	569.564	613.545
875.325	385.48	184.187	192.246	269.51	383.031	263.044	302.647	316.01	756.081	406.268	444.615	375.314
787.81	115.602	28.0812	53.7704	129.675	86.2969	81.9221	43.8012	77.2385	102.267	71.0854	85.8641	67.5473
786.813	90.5811	29.1287	50.473	107.968	110.48	88.1817	43.5745	69.2327	124.376	49.5829	69.7736	55.1299
779.318	874.799	198.772	561.967	1147.44	888.394	767.535	357.465	726.243	959.349	597.101	819.797	571.72
790.816	106.151	8.93963	54.9709	119.573	116.878	100.249	34.7809	85.6187	125.869	67.5662	84.2563	65.9026
886.841	108.138	37.6931	65.7536	85.038	131.374	75.3022	29.6871	62.8457	118.14	70.9966	51.938	42.6971
780.81	115.11	41.1994	64.467	150.751	175.522	165.037	45.5959	113.578	127.294	90.3363	132.612	70.2362
215.091	1495.96	2071.16	2719.82	1346.75	1366.11	806.648	1318.2	2028.07	1360.05	1469.47	1181.93	2689.17
791.749	81.0802	88.2467	63.8613	121.842	217.894	345.543	73.1053	100.538	92.9419	47.6148	79.3801	54.7503
763.359	377.032	131.525	293.928	419.844	556.794	570.893	229.23	404.706	687.591	246.006	316.293	229.261
888.874	134.44	4.57668	87.038	108.31	116.801	90.2261	35.0713	71.8401	146.994	72.3571	93.2099	83.8641
770.837	81.3741	6.09969	54.6609	108.256	64.5768	81.8304	29.869	50.5881	122.1	87.9813	65.6548	43.6609
887.876	143.821	3.5111	132.904	131.586	103.933	90.6786	54.4976	104.7	189.961	84.3348	136.683	64.8272
238.072	246.263	723.909	524.622	270.612	339.079	379.863	177.601	451.136	391.767	400.494	321.993	300.546
220.062	130.749	81.963	108.01	69.6428	67.2157	38.6021	85.1763	191.666	110.991	77.9057	134.876	105.466
854.865	242.343	15.5524	93.3108	247.614	312.732	213.799	65.6072	136.082	241.221	65.482	147.02	117.229
802.752	63.7134	110.672	71.5011	127.653	87.3915	142.273	34.5286	83.1983	93.7609	49.2188	84.2738	52.7605
920.638	110.373	95.682	37.9052	79.3687	99.6021	167.475	30.1886	39.3831	168.275	40.1055	136.246	68.1973
853.875	279.572	4.66917	61.6753	179.359	359.582	236.36	73.2043	55.8173	206.399	39.4654	208.77	40.3542
825.857	157.752	37.1074	116.395	168.839	379.778	222.484	57.9793	134.136	157.54	72.3173	144.313	87.5797
876.878	236.891	13.932	103.891	204.62	401.586	92.6427	70.2378	80.5669	159.871	53.406	140.407	98.0934
911.826	220.551	164.17	181.901	260.865	330.068	271.455	83.7345	194.206	198.59	129.599	193.293	137.942
979.474	468.922	70.8673	415.551	365.727	571.225	340.312	204.537	460.367	409.294	382.436	509.323	437.476
854.367	294.518	114.691	114.578	214.051	411.308	228.218	92.5845	121.561	203.481	75.7785	242.643	121.305
296.111	307.835	548.817	540.068	402.61	422.934	515.031	308.273	628.986	318.811	469.726	467.222	544.565
289.124	1417.82	1963.4	2299.26	1073.62	799.977	518.434	845.202	1492.8	864.552	1151.93	755.571	2242.77
295.119	1621.64	1897.64	2976.4	1756.7	1856.63	2611.88	1949.62	3080.48	1459	2223.68	2042.31	3061.5
861.854	137.058	5.81657	65.3361	152.8	175.579	68.0498	31.628	51.6991	122.627	72.2928	97.037	37.2269
404.191	721.384	1923.06	901.395	2122.06	1629.28	1385.68	237.473	820.306	707.847	334.078	674.561	390.857
596.296	933.129	1444.92	1076.04	1220.45	515.88	266.822	718.461	1358.49	907.386	825.714	1190.14	839.294
206.046	296.704	651.757	535.639	336.266	408.265	415.265	192.997	471.593	470.964	477.107	327.519	316.368
597.301	315.602	536.467	362.17	436.239	183.198	110.936	255.235	487.894	345.753	283.428	447.76	309.986
901.301	851.355	799.363	625.354	1002.39	1465.45	1199.41	386.324	736.214	847.441	442.878	729.861	620.925
331.139	2088.06	2757.08	4298.74	1385.3	1603.83	594.526	1467.69	2060.19	789.061	1697.39	876.207	3709.63
900.8	1272.2	1127.56	861.317	1496.41	2239.93	1928.86	465.804	1029.15	1369.85	690.433	995.802	948.966
901.814	489.928	282.854	299.325	488.684	764.158	496.188	139.457	294.56	452.412	224.832	395.085	242.029
485.122	739.041	922.199	929.421	266.803	447.013	386.338	659.989	1125.81	279.662	494.574	770.859	695.319
228.07	96.8014	500.595	246.1	254.676	167.986	189.541	142.182	232.495	272.966	597.426	98.7932	217.407
442.173	512.291	587.263	505.601	478.657	738.015	183.755	275.814	567.361	319.249	188.983	418.718	436.274
132.074	129.204	82.6302	104.238	76.8871	57.9686	66.6993	26.771	59.2828	21.996	70.9381	52.1515	37.3778
239.066	524.11	880.657	1070.38	853.919	544.802	533.761	530.636	897.907	598.405	675.09	812.97	1084.61
158.084	167.562	45.8978	91.6728	104.289	151.178	40.473	73.5029	84.9317	79.8624	58.4899	128.858	72.8855
250.055	69.078	102.284	151.247	107.455	153.674	139.203	113.278	159.613	191.403	240.507	111.644	168.02
229.108	2062.31	1463.06	3971.31	1712.07	2045.76	1010.07	997.802	2485.12	788.581	1717.37	814.061	3527.84
131.072	1625.72	1131.83	1448.28	1072.61	802.35	998.111	347.545	771.947	280.128	524.595	630.704	439.018
409.116	2400.54	3125.29	4435.94	2143.44	3196.94	1027.39	2078.77	3260.54	1089.72	1705.19	1137.82	5445.04
547.732	71.496	24.1727	47.6682	46.3528	51.8999	35.2738	30.1461	50.7265	50.881	57.806	71.2703	56.1288
902.835	165.194	63.4431	98.0687	187.016	223.168	123.152	40.0838	98.8201	159.15	91.1556	137.472	106.946
902.329	355.492	263.367	228.073	390.002	488.202	274.57	130.892	214.465	330.347	163.698	300.646	242.433
307.091	888.31	1264.65	1702.16	969.743	999.483	565.136	1310.11	1434.06	695.882	849.13	575.998	1598.29
370.093	375.844	781.603	497.605	507.483	748.351	444.799	408.25	464.321	509.917	529.481	518.417	574.261
185.082	1355.34	1732.84	2580.33	1215.36	1206.02	505.675	966.636	1579.28	748.368	1056.53	1109.34	2518.97
318.127	662.329	1042.45	1225.37	604.93	637.189	306.294	502.409	710.655	343.795	467.924	296.991	1034.85
152.547	35.0567	13.6677	17.1393	7.89766	2.68256	25.3245	27.6717	29.3659	3.73106	26.4285	24.0904	39.7588
193.067	90.3204	81.9896	121.644	153.362	323.875	177.9	280.751	178.885	607.962	327.219	172.584	271.056
192.067	397.546	257.322	672.802	1018.12	2346.92	1180.18	2137.04	1093.29	5008.09	2390.83	1179.4	2013.66
495.119	5975.4	18424.5	3597.31	10312.7	27693.7	11591.3	8784.66	5281.23	15946.1	10589.6	12499.8	11755.8
348.087	1787.14	5529.78	1075.41	3096	8052.16	3405.5	2621.43	1615.43	4514.62	3124.44	3792.63	3474.08
517.111	368.497	1030.54	239.119	634.594	1095.79	621.902	355.395	399.895	637.368	628.321	694.704	461.781
518.114	165.453	414.505	162.532	205.282	295.158	261.38	112.555	212.269	218.307	240.192	253.924	204.711
593.1	124.604	326.521	135.731	183.949	324.224	178.975	272.671	149.961	209.148	206.247	197.065	256.62
496.124	1592.61	4775.98	1104.92	2703.81	7158.65	2898.44	2285.9	1519.7	4074.5	2753.75	3248.77	3063.76
317.124	3771.79	5758.74	7105.84	2887.29	3388.47	1599.05	2835.29	4268.12	1609.94	2689.44	1643.45	6050.81
345.924	35.2254	63.908	69.6396	48.6547	37.431	29.5512	77.5214	48.4928	33.5278	43.9808	69.439	63.9347
991.247	213.785	1453.55	122.82	353.697	3361.49	1096.72	860.944	215.406	1257.44	610.561	811.245	720.314
493.559	46.356	151.211	37.0675	98.6004	251.81	112.016	81.4984	58.7653	122.049	95.8979	100.271	101.832
185.028	771.07	316.146	421.621	1729.29	415.728	335.225	135.629	523.765	374.044	759.434	1293.85	857.656
351.018	269.195	361.683	191.181	93.0613	165.538	167.275	173.015	433.782	102.295	180.682	199.326	215.936
153.02	2838.64	1058.76	1494.06	827.039	375.022	593.183	2189	2430.58	621.429	2182.5	1894.31	2331.29
154.023	224.197	290.911	118.053	73.4124	41.8759	51.3881	175.216	195.045	48.9155	175.923	158.106	197.338
350.091	338.064	664.323	423.701	466.445	805.515	349.906	391.036	434.21	471.81	425.771	416.996	601.89
353.091	2517.31	3633.18	5081.83	1555.49	2490.69	1154.12	2479.06	3058.84	777.219	1602.32	2330.8	4891.72
231.087	656.06	1011.55	1592.36	494.707	709.982	269.069	743.673	807.359	432.892	541.831	350.354	1505.96
142.051	251.007	310.452	291.808	258.117	294.559	324.341	91.1317	235.343	184.764	198.981	238.463	131.326
375.162	1665.78	3593.32	3515.1	1437.27	2088.78	1395.61	1563.52	2820.79	1153.23	1671.12	1110.13	3073.2
263.019	167.314	437.65	134.696	55.6184	151.143	153.48	141.168	328.396	90.477	166.171	134.407	238.892
141.089	62.5777	76.9897	114.364	59.4543	57.1078	28.0411	46.6935	63.5417	37.0174	58.8559	49.5837	116.353
121.029	205.315	210.742	587.98	140.544	332.96	319.113	352.101	739.896	344.203	424.34	300.382	491.746
127.075	115.348	155.101	260.979	101.656	136.087	64.4793	99.5971	151.598	77.1275	96.3919	62.5377	226.747
230.106	337.973	465.4	581.34	361.118	322.48	212.621	171.371	423.502	222.142	324.979	440.759	525.657
791.257	280.016	422.925	329.854	342.367	524.21	698.394	460.777	624.655	333.856	339.499	402.155	371.69
398.121	493.985	781.592	841.424	367.983	618.223	281.764	346.606	736.61	261.241	371.772	347.052	825.37
808.745	377.662	234.893	196.605	267.373	625.73	321.572	135.718	147.367	185.913	227.901	176.848	181.233
644.791	85.433	9.71784	36.1665	1115.44	225.924	63.7635	236.43	364.31	263.44	51.1879	31.7705	43.0944
397.116	2771.38	3924.94	4501.7	736.951	3228.29	1302.66	2070.42	3804.7	1146.7	1945.8	1457.02	4423.13
293.069	1692.5	1639.68	3621.82	1556.41	1815.5	710.477	1459.03	2370.39	1064.67	1598.09	1159.39	3835.21
146.022	493.592	141.179	169.74	181.255	255.932	92.5333	401.204	281.347	485.335	398.17	558.124	573.518
838.797	968.251	726.843	627.131	954.672	1439.28	1090.17	205.301	623.508	769.829	423.491	674.23	498.033
652.308	431.694	208.489	406.856	536.472	543.322	389.264	232.766	433.017	421.979	507.878	468.356	373.982
616.351	1235.18	251.857	1147.08	1448.53	1257.11	903.362	427.452	1221.54	1320.69	1672.76	1326.84	1145.86
617.341	519.234	268.464	794.35	575.278	491.672	341.871	305.382	577.44	481.237	608.076	507.502	681.686
618.363	92.9592	3.04266	82.7042	109.676	69.6358	67.1576	29.9244	89.4449	102.484	122.071	95.2806	76.0112
379.107	1715.85	2724.47	3082.8	1965.24	2030.36	2088.42	1528.11	5638.67	1243.62	2772.53	731.191	3204.68
241.108	1433.5	2299.97	2395.57	1264.78	1610.08	743.887	475.03	1682.44	724.095	1142.87	882.461	2310.29
625.14	323.068	994.933	930.695	115.791	350.489	739.06	206.116	808.048	173.184	410.161	991.385	222.127
407.121	723.302	972.959	1171.83	1221.2	1126.23	406.101	662.151	988.934	984.615	732.395	794.369	1163.11
201.113	648.461	665.538	772.073	819.666	938.32	1222.2	675.726	1447.04	1039.22	1042.53	1081.77	982.645
443.168	634.513	4380.5	1574.86	527.589	586.17	312.177	549.678	933.431	465.83	928.936	1295.67	1499.31
146.063	56.6154	38.6599	52.9517	29.9989	24.8536	28.4156	23.7379	46.2467	55.1866	51.0954	90.9862	47.9725
263.518	12.1375	93.8107	15.1762	5.7556	21.2605	16.4407	13.9524	44.5162	10.6014	25.4214	22.2033	15.5762
549.028	119.677	716.356	81.6975	50.5427	187.647	156.951	79.9887	257.307	113.475	240.536	145.827	117.328
262.015	318.248	2454.06	620.184	245.074	489.816	626.586	503.209	1483	382.673	597.862	505.009	476.289
262.515	68.6618	609.154	150.513	58.6622	119.136	154.612	113.364	343.158	92.6053	137.484	120.448	119.48
190.051	497.112	326.694	463.759	232.497	299.167	269.808	345.402	496.438	501.661	565.409	897.552	513.262
224.057	453.621	278.003	329.782	530.546	606.719	117.64	199.242	326.747	483.977	186.465	373.724	271.907
527.047	836.607	9444.06	940.279	289.387	1645.54	1276.16	944.365	2513.99	732.873	1751.93	1174.74	990.854
336.08	814.366	655.217	671.298	529.648	546.227	347.679	440.405	816.276	675.132	490.086	469.074	1041.87
528.054	217.242	1650.12	231.593	118.65	405.948	307.814	230.507	626.535	197.95	446.894	288.743	296.611
462.093	238.971	488.189	496.509	296.55	346.145	473.577	465.695	837.198	349.683	509.446	439.484	484.123
430.089	564.037	2493.52	1271.67	378.148	880	3135.72	1363.35	2704.87	1618.74	1553.15	606.954	1002.24
429.084	1881.54	10199.7	4824.77	1267.3	3319.06	13144.1	5383.34	10771.3	6569.1	6018.42	2115.16	3898.54
280.12	203.052	222.665	219.654	308.239	239.621	93.8929	182.234	383.707	307.122	263.141	436.785	223.358
526.039	506.856	8215.64	1188.64	449.461	869.047	1492.62	1247.99	2802.51	756.675	1101.46	1006.53	840.133
859.191	136.597	1507.33	428.778	178.084	317.168	2807.34	1006.04	1214.82	533.229	414.238	199.456	278.091
487.038	80.9015	245.686	117.847	60.1024	126.035	367.602	115.086	231.827	165.98	171.956	80.1585	116.987
525.034	1859.77	32994.8	4601.03	1603.89	3487.35	5844.3	4839.95	11135.1	2838.83	4189.71	3933.93	3325.77
461.083	821.868	1297.65	1583.19	947.158	800.276	1746.5	1659.65	3397.27	937.275	1862.72	1287.37	1578.3
337.041	5445.6	4367.45	4942.08	2653.54	4047.02	2406.36	2291.62	6365.85	1579.62	2184.51	4425.15	3903.83
338.046	1007.66	769.603	711.675	508.404	746.301	405.298	441.398	1155.23	376.608	403.818	882.035	740.574
365.123	1662.15	1956.78	3349.26	1476.82	1756.14	933.467	1315.53	2030.07	899.274	1354.76	918.473	2305.61
186.106	419.981	572.108	618.709	754.635	410.789	376.267	299.536	507.093	711.569	1391.58	941.261	756.773
956.357	367.178	160.274	413.892	433.664	637.989	162.681	250.712	473.22	460.2	295.672	486.2	219.609
279.112	554.113	806.219	987.109	614.075	581.453	362.667	776.576	1839.32	824.571	1245.12	2153.27	1157.5
329.158	1304.7	1714.41	2506.79	1363.76	1566.49	652.857	965.178	1679.88	778.282	1114.09	786.665	2113.34
271.118	1269.6	1485.11	1927.71	1436.87	2739.37	1231.78	609.04	1300.14	617.303	921.844	698.371	1576.23
253.036	146.078	240.02	154.71	162.982	115.279	207.403	129.835	313.886	120.788	216.282	139.337	315.164
367.007	147.897	199.042	313.123	95.799	263.716	183.135	219.888	529.522	264.756	279.503	190.805	243.295
367.107	4915.93	5097.93	7111.73	2019.85	4363.28	1834.63	2330.73	5664.28	956.79	2496.51	2009.12	7215.66
846.863	1025.01	5.49952	225.07	1325.54	1934.52	333.405	257.086	310.247	1612.67	58.7422	585.507	157.78
865.355	770.192	940.02	817.573	966.282	539.974	143.723	763.932	1500.1	553.802	686.603	753.752	618.001
866.356	416.522	520.9	411.559	479.468	326.842	186.18	410.317	750.179	309.059	323.111	382.075	302.55
845.861	2288.83	5.47477	459.997	3036.69	4304.28	734.234	575.772	712.645	3537.83	136.071	1280.52	348.434
339.037	472.701	323.154	281.496	268.124	283.534	212.241	172.203	475.238	155.563	194.127	416.504	222.039
172.098	1036.31	753.108	1343.6	903.461	878.469	1619.25	618.854	1679.2	1027.07	3339.39	1017.3	1748.42
833.854	322.839	5.87191	86.0372	142.065	390.697	46.0005	40.3932	45.0934	105.877	19.1341	160.35	60.7041
832.853	752.258	7.81409	179.446	350.138	1024.44	115.742	105.663	110.062	231.053	46.1143	367.016	162.014
358.023	181.269	225.043	197.44	191.124	152.509	153.838	116.586	169.008	148.489	210.717	171.509	244.601
769.504	100.07	12.8833	111.062	72.9699	91.5046	46.0257	44.643	98.9223	134.24	105.893	172.226	63.9025
715.807	40.1705	12.608	32.0929	49.4616	47.2698	26.0512	12.9189	27.4374	49.7049	44.4653	42.8435	30.7871
333.113	1569.63	2070.6	2815.56	1320.98	1581.07	856.581	1413.69	2379.61	904.832	1239.09	2345.88	2496.35
359.131	1285.14	1181.62	2944.2	1274.96	1355.28	656.149	799.209	2097.64	671.409	976.009	785.798	1876.81
249.083	470.615	410.016	314.91	320.177	200.627	244.619	114.893	333.38	329.759	271.671	378.691	226.285
714.811	122.514	19.5837	96.4944	111.051	125.605	91.2404	48.8037	81.5761	111.795	119.202	143.274	95.9498
379.155	1105.1	1143.86	1691.7	593.233	1324.33	476.301	582.833	1271.6	502.839	795.586	724.507	1241.17
379.009	166.659	186.94	145.507	117.468	110.655	133.138	65.7409	169.919	107.265	171.926	128.586	159.053
325.095	2176.01	3655.87	5433.62	1410.31	2098.15	989.671	1991.55	3458.39	918.968	1643.31	1144.32	4724.49
431.098	5686.92	1762.01	1685.46	716.947	2726.91	12036.8	4106.03	9025	1247.1	2288.05	3107.24	2814.45
459.102	1025.81	2735.38	820.496	543.848	974.59	2480.94	1579.8	3029.82	1110.44	1893.83	1003.76	1243.31
460.109	369.45	778.562	420.869	253.264	354.495	689.414	486.492	864.015	371.135	586.007	301.646	475.345
547.021	146.806	1469.95	165.566	122.834	170.082	305.472	197.215	403.998	181.59	249.562	246.649	177.389
692.122	144.546	508.127	164.179	145.173	69.8715	225.48	97.5887	174.045	98.5169	96.999	169.746	143.514
847.859	1743.16	13.7653	752.123	1653.51	3340.95	2538.95	249.288	830.227	1239.46	430.708	977.043	391.113
691.122	301.219	1446.53	363.167	345.235	159.384	210.627	116.792	272.111	149.228	132.939	447.921	197.123
858.848	218.585	9.55822	67.6458	183.133	411.012	311.543	19.8966	107.62	132.455	48.5808	126.684	32.4005
257.819	119.491	392.807	153.456	123.341	117.102	199.165	249.404	184.607	192.721	159.71	184.95	211.579
848.357	1493.54	187.847	704.005	1403.2	2844.31	2203.15	297.334	816.308	1002.76	433.165	897.036	497.395
483.114	1121.07	6497.71	1926.08	847.592	871.762	717.028	1060.85	1982.36	675.14	1073.8	1043.42	1575.85
208.062	396.28	2233.9	325.163	389.622	483.168	137.608	85.1424	263.778	329.741	352.776	357.128	226.727
598.118	115.183	261.816	118.548	152.616	220.149	176.632	162.19	154.341	133.038	252.394	157.325	175.184
848.86	726.886	10.5032	321.123	681.758	1421.37	1119.66	80.0566	344.064	488.789	180.425	418.34	157.797
567.176	325.07	443.198	589.252	705.726	1510.61	460.799	1442.33	443.364	8526.49	603.343	332.786	1463.83
182.081	314.798	57.7085	60.0438	32.7957	147.929	239.696	68.7126	216.178	33.456	192.664	286.671	331.457
672.849	45.8541	3.88031	20.4333	29.1235	60.7139	54.8099	2.24707	15.0585	39.4049	16.7042	49.7181	12.2179
484.111	284.98	1614.81	313.315	202.727	268.909	181.762	259.142	439.977	220.707	277.856	307.298	418.269
283.083	1332.82	1027.71	894.967	4008.68	7299.21	2915.66	4691.63	2128.36	17683.7	3968.92	2021.84	6574.6
284.087	252.242	232.241	208.079	672.715	1187.61	486.881	730.098	384.494	2590.44	645.094	331.067	1059.59
115.07	71.6492	87.4032	133.959	84.9876	68.1597	37.0954	63.5331	66.6458	49.4417	93.3832	111.451	123.665
202.11	222.411	246.859	346.621	297.631	289.765	524.228	226.752	777.527	411.908	598.168	417.554	396.894
557.159	745.908	2369.64	953.908	608.746	652.985	670.697	644.354	1288.42	563.244	865.636	1095.05	1122.31
341.035	116.687	118.567	111.296	210.608	295.585	165.776	112.249	137.562	350.673	198.599	137.158	214.366
247.085	659.747	734.054	673.437	999.75	601.969	595.468	351.057	844.372	615.312	890.323	1618.81	897.014
248.056	155.202	1812.88	144.677	238.058	268.278	140.509	73.8452	203.525	86.8569	187.305	410.299	198.383
342.034	173.198	186.599	177.768	134.63	171.804	129.128	147.658	110.96	157.673	120.914	92.0463	216.88
159.082	430.074	549.499	725.831	519.511	444.351	367.834	340.234	561.687	432.017	540.073	656.443	651.245
309.096	2597.06	4136.26	6712.74	2460.4	2953.93	1428.46	3287.53	4161.56	1290.83	2189.89	1670.95	5933.32
310.097	461.819	745.488	1068.4	399.081	503.721	253.155	538.035	737.996	253.072	404.218	320.268	948.349
248.537	27.2528	418.817	24.0709	32.8331	56.9425	26.0526	9.5132	34.4219	6.19378	28.9878	56.5006	35.2776
111.083	45.7944	66.7272	71.3078	55.7493	52.8079	33.3314	26.9608	65.9719	36.9197	41.7435	87.1423	63.6144
174.081	621.363	534.191	655.014	709.715	716.358	577.136	269.017	663.857	259.348	656.722	818.323	581.707
173.083	4223.56	5569.47	6835.46	5292.78	4317.79	3176.94	2480.83	6530.46	2619.83	4508.86	8635.2	5986.16
299.94	53.1487	85.405	61.6193	65.3217	41.659	76.3541	73.6661	62.8551	89.1517	60.0586	119.067	124.727
301.039	406.098	326.162	388.842	257.773	329.212	234.316	285.614	592.874	187.882	348.586	217.66	590.572
172.543	47.2312	67.4605	75.0861	62.477	52.8093	32.2288	20.2884	80.5312	25.4456	51.2712	99.0644	80.9536
333.921	80.4242	174.783	120.048	122.382	70.9936	105.632	180.567	98.494	157.642	89.3903	157.604	177.614
535.178	601.428	2043.9	765.993	729.955	744.075	1030.14	762.381	1083.82	721.255	738.605	661.143	871.239
335.916	79.3603	195.367	103.264	103.855	66.8579	84.4962	177.359	96.2813	142.823	106.66	178.377	201.773
195.064	286.585	269.244	267.34	282.287	283.182	338.364	142.152	396.366	141.367	406.424	505.581	257.495
107.051	98.4085	26.2551	36.7471	152.42	111.146	47.5596	338.978	64.2935	334.287	160.861	99.3048	197.905
151.04	319.602	255.985	319.906	190.183	184.948	158.968	122.155	210.277	156.861	448.29	465.594	327.043
194.046	112.562	67.963	59.3806	55.0535	54.1449	74.0133	70.3152	185.85	51.1178	126.104	116.728	96.1521
381.121	3227.18	3913.11	6726.82	2197.32	3789.41	1794.1	3283.37	7862.57	1367.71	2453.08	1831.02	5678.28
254.079	202.716	613.255	439.092	213.896	217.462	110.123	160.189	287.525	132.535	198.094	178.855	438.833
696.186	300.395	621.608	327.208	410.003	399.624	465.424	824.581	575.491	304.268	651.732	681.178	1024.79
189.009	585.617	218.347	266.349	1295.75	1072.15	433.907	3299.83	672.165	3474.54	1107.83	410.412	1863.03
233.042	323.889	136.392	300.664	392.273	319.893	220.411	83.1799	235.253	204.537	260.413	307.929	218.046
737.192	235.716	210.006	159.353	237.103	213.952	296.978	471.643	420.182	519.753	393.477	230.788	557.127
695.179	654.24	1219.9	959.896	1001.03	905.119	1157.34	2076.71	1442.44	670.877	1726.41	1742.96	2570.42
432.105	1490.74	1686.58	728.041	485.334	756.807	2883.84	1075.4	2254.22	463.843	670.691	853.139	807.047
188.01	764.952	185.361	132.095	2005.17	1552.52	608.049	5074.22	838.492	5100.56	1558.29	534.9	2649.79
186.425	81.5439	21.5487	16.4194	244.622	178.972	73.367	619.14	105.457	619.33	187.597	67.5076	320.772
187.008	8394.6	1855.24	1364.78	22056.6	16965.2	6867.11	53975.5	9674.15	55668.5	17595.6	6290.82	29942.7
614.208	297.554	886.493	236.181	340.5	492.775	151.226	305.695	296.785	363.738	207.298	279.68	384.129
179.037	644.778	761.67	974.292	507.336	507.041	259.58	442.516	903.626	222.156	492.249	670.785	982.057
912.865	121.289	3.87543	6.20398	168.27	204.295	115.207	149.407	64.7134	280.316	41.8382	74.1249	84.155
689.107	103.528	807.322	220.573	132.38	136.582	115.482	103.144	139.473	136.105	134.989	242.426	115.242
254.997	69.3312	63.2558	29.6392	167.161	116.286	61.3964	125.002	76.2997	281.522	121.028	58.1678	114.279
253.075	1580.03	2838.44	3677.24	1445.62	1747.91	973.646	1743.21	2549.7	944.731	1404.27	1084.08	3617.79
610.312	194.317	408.376	391.577	181.258	202.614	94.0788	476.27	309.563	323.864	443.782	486.421	313.645
426.174	782.947	941.687	926.63	660.812	1046.77	212.94	522.785	779.797	419.191	344.199	835.455	721.568
386.175	708.128	407.352	602.709	505.383	476.867	697.211	459.497	783.149	420.885	468.673	718.58	560.039
162.022	128.56	61.5878	64.0067	69.3541	68.3891	61.0011	62.2018	118.474	103.367	135.649	175.678	150.56
184.098	1352.42	249.311	408.202	805.98	960.881	915.485	481.773	927.278	791	623.618	1362.21	930.903
513.072	684.477	37684.8	1412.95	609.063	714.938	656.163	529.617	1261.7	322.973	1334.07	1979.52	539.771
766.347	565.63	213.446	249.723	2333.21	1699	1075.9	581.889	1238.06	849.622	187.496	169.904	258.796
784.842	29.0023	9.94099	5.62428	96.976	91.6827	63.1302	29.5753	48.3773	45.5116	5.00081	8.88111	3.72696
397.007	247.263	265.198	153.794	973.638	562.698	240.66	3224.22	416.662	4525.6	814.641	264.435	1210.95
766.854	358.157	4.60433	75.9771	1840.09	1301.24	854.254	449.213	907.097	583.637	71.9404	47.3221	64.7058
163.032	381.546	171.97	762.531	246.288	287.897	651.588	726.877	814.83	855.395	943.871	502.852	869.558
767.855	88.7462	4.14335	20.1137	362.787	269.296	156.578	91.0319	152.236	153.946	13.3517	19.6506	29.1142
777.845	44.4022	3.92904	8.70426	214.868	131.897	111.995	41.5027	94.3688	98.1252	7.26302	11.5025	2.45194
545.028	566.899	172.608	210.416	249.739	272.581	50.0268	264.173	212.262	222.282	126.279	444.161	240.162
773.358	479.384	255.197	603.29	534.504	602.573	433.201	337.445	654.752	459.573	309.403	469.833	415.766
774.35	261.622	177.273	280.704	236.807	281.506	201.683	200.89	287.437	259.711	177.238	249.417	230.699
119.052	45.7357	16.5045	99.9357	31.928	33.2438	101.211	97.3465	110.7	70.8149	126.007	73.1968	125.615
335.085	2280.11	2724.43	3379.78	1910.1	2297.84	1284.49	1306.22	2847.33	1215.85	1697.89	1260.42	3142.96
418.168	805.126	471.801	781.021	654.709	705.237	528.976	399.664	991.416	599.136	515.759	790.995	600.213
549.162	2269.65	2729.59	1876.32	1647.94	1404.01	1886.93	1667.01	4327.38	1986.36	2671.11	3139.61	2681.35
395.101	6076.46	9278.39	11015.4	2995.66	5181	2440.46	3533.47	7405.11	1819.69	3214.26	2760.49	10400.7
165.056	1482.74	517.655	991.669	383.556	398.967	1382.03	943.024	1511.41	541.876	1976.34	2171.7	1214.83
166.058	172.849	68.9666	110.216	44.4381	54.1381	148.614	102.691	169.554	66.2317	216.768	226.529	136.149
550.168	786.53	792.625	704.259	671.928	614.365	653.179	568.334	1401.23	673.058	843.434	1026.79	939.88
237.08	658.89	925.47	1191.03	629.451	665.07	475.44	922.497	1433.68	797.625	1483.32	502.902	1184.94
394.122	548.968	1217.17	987.091	588.62	645.602	353.458	812.131	848.844	477.564	558.772	452.402	789.367
374.137	344.91	993.871	408.654	367.79	439.488	316.795	172.062	440.007	236.446	320.522	319.042	365.587
829.392	302.923	240.476	317.409	338.269	337.351	236.554	196.952	314.624	275.936	313.42	292.801	332.213
287.118	3744.5	3873.34	7942.25	2591.8	3667.69	1451.13	2805.65	4006.16	1234.92	2596.17	1379.9	6701.96
349.988	180.991	130.573	174.246	116.31	120.033	123.21	204.161	203.565	350.714	259.248	186.716	220.151
828.42	494.284	176.026	428.345	588.46	658.339	523.268	259.795	483.278	531.416	589.111	536.334	416.824
794.45	206.202	77.5515	183.563	228.651	216.695	164.996	106.866	208.818	209.821	262.193	240.702	210.984
999.543	186.255	25.3167	189.403	211.344	105.616	140.908	84.3491	229.9	227.813	320.585	183.396	153.355
792.458	1510.23	93.7141	1199.08	1662.69	1554.68	1204.76	496.299	1314.18	1740.6	1933.68	1698.68	1202.3
288.121	583.92	3672.44	1027.93	400.007	574.241	259.391	429.701	793.42	339.994	426.158	358.428	841.594
793.456	637.453	99.0878	545.936	665.192	643.343	478.444	222.082	545.671	654.468	781.776	704.586	508.462
368.919	42.9787	92.8399	65.7653	37.3741	25.1221	70.5514	51.9741	74.1107	40.1654	43.7821	44.3421	56.905
347.133	2359.85	2839.94	2554.21	3688.63	1928.91	1893.27	795.8	2122.34	1131.12	1416.6	4071.07	1796.47
489.136	349.874	1023.06	407.788	301.419	349.087	328.245	322.878	284.541	427.505	312.243	382.523	622.848
206.082	2200.18	2012.13	3054.56	2711.95	1525.02	2600.8	1279.73	4630	3081.12	4165.36	2095.63	2493.29
366.922	43.2429	103.067	75.3364	38.3771	25.3973	78.5195	52.4011	77.7526	45.3458	57.6113	48.8589	59.0872
439.132	3185.53	5292.05	6425.89	1307.8	2714.65	1517.76	2002.12	4695.64	1000.66	2016.61	1797.13	5703.92
219.06	270.318	213.008	269.598	377.038	291.725	245.312	153.496	301.164	340.161	335.602	300.567	256.648
307.086	2355.81	2959.01	4503.78	2121.2	2575.21	1414.16	1880.47	3364.25	1175.73	1821.05	1456.02	3632.8
308.091	533.308	711.352	881.889	400.778	541.009	322.562	417.463	590.485	263.539	574.7	334.85	765.858
217.108	1130.64	1674.06	1844.91	1411.95	1187.34	1007.05	659.559	1939.84	509.155	1384.49	706.331	1299.99
317.032	199.076	445.631	672.589	459.513	340.557	195.709	309.191	346.845	128.071	117.838	274.91	543.768
571.038	117.449	566.659	90.6464	104.572	109.643	185.915	140.428	223.173	130.127	195.329	175.431	169.831
967.49	91.2408	31.9711	92.5661	106.772	187.557	81.2647	88.5998	127.683	99.0483	110.743	126.763	90.6438
361.146	2447.73	2431.17	3988.68	3693.97	3515.36	1155.07	1825.38	1976.91	1059.61	1036.59	1585.08	3528.05
396.009	168.232	487.74	241.688	184.515	138.624	136.701	186.005	448.015	181.651	270.27	308.913	283.355
343.139	2611.58	2923.8	4927.61	1883.89	2056.14	1158.12	1718.72	3031.54	1331.17	1870.02	1449	4228.09
279.09	1049.58	2526.4	2567.73	1025.88	1202.41	496.046	1522.77	1626.08	600.596	822.802	756.27	2384.27
364.997	191.073	1265.92	514.181	305.489	184.639	368.28	378.996	1061.82	321.499	453.585	463.22	359.296
207.071	790.525	949.689	1109.31	1125.26	893.543	698.224	441.826	1253.4	849.899	1033.21	960.159	1142.27
164.039	748.521	314.128	344.259	260.83	276.351	133.683	562.658	498.071	746.868	701.021	732.594	856.27
441.15	1456.86	4473.33	4934.34	1370.76	1815.1	873.232	1558.21	2110.03	696.072	1127.12	1724.27	2318.85
579.175	857.922	1050.2	913.969	727.109	776.877	508.052	956.471	2283.32	1522.43	2209.15	3446.05	1552.9
844.394	383.918	189.193	300.071	273.385	460.398	270.896	239.907	287.625	542.221	563.89	463.547	472.231
120.046	53.3921	75.2067	19.3745	15.5929	19.8612	7.54893	46.1416	36.1317	48.2726	62.1175	48.8997	60.5568
236.091	262.216	548.832	609.925	456.547	377.591	749.602	485.528	1703.03	1174.14	1165.52	607.9	717.768
225.04	79.9909	124.619	154.886	112.248	81.8164	63.4592	90.3731	110.292	45.65	62.7355	187.6	182.197
615.159	462.921	493.902	484.585	459.742	441.117	368.571	675.095	1224.37	832.822	1075.83	1722.13	704.497
843.389	751.998	282.415	552.785	564.246	837.778	524.069	444.852	550.286	1002.68	1032.89	839.495	897.888
625.176	882.162	6552.96	1100.52	896.985	645.024	806.34	986.039	2481.05	1427.78	2014.65	3437.62	1574.48
456.195	1420.78	1168.5	1114.56	1054.78	1903.63	616.751	595.292	1174.57	732.609	475.54	1136.5	965.509
157.087	383.957	371.519	356.872	421.593	379.01	527.876	293.422	594.225	586.899	437.595	375.997	364.024
474.202	472.436	594.54	534.821	481.194	614.063	182.803	264.295	527.54	307.123	304.913	382.833	467.79
175.09	279.807	309.562	306.332	213.752	311.329	161.062	206.262	327.636	169.844	439.772	169.464	326.957
289.039	276.896	230.918	148.374	102.933	92.355	126.766	141.54	224.104	145.272	213.066	306.014	220.737
393.122	3243.88	4776.54	6254.26	3673.21	4328.73	1975.17	2613.77	4641.02	879.233	2502.21	1140.18	5430.14
218.091	326.362	250.43	311.735	611.299	360.731	157.16	220.659	324.007	645.842	133.834	289.617	224.787
281.107	810.641	810.602	1345.14	1089.71	975.539	895.518	697.354	1620.95	770.874	1067.43	843.13	1242.84
477.175	1746.31	2277.45	1747.4	1213.1	1496.49	1596.49	1253.38	2247.32	900.311	1808.67	2108.08	1981.09
447.099	2873.2	3460.76	2201.47	885.092	3990.04	4726.41	2637.32	6117.35	2097.7	4366.8	2066.16	3088.48
478.185	646.971	747.239	672.4	375.973	529.09	520.708	526.666	980.401	332.648	664.777	767.59	760.646
522.214	630.631	573.26	665.438	637.893	786.962	217.465	519.971	913.241	498.93	330.534	518.006	615.597
273.134	1857.66	1787.16	3449.84	1026.15	1861.24	837.647	2329.05	3292.11	807.01	1322.37	1138.23	3354.78
305.159	842.85	898.415	922.577	610.607	1068.93	527.697	466.36	873.52	489.558	563.485	514.329	1063.05
269.045	78.1947	375.766	218.197	64.001	127.25	360.981	332.33	418.612	253.723	243.451	711.919	219.938
539.021	65.0225	860.787	108.817	110.026	76.9519	122.74	131.18	171.754	65.8263	188.359	150.904	130.273
443.683	15.3135	158.308	45.3842	16.1438	23.5593	84.4032	50.9734	82.6227	54.3716	65.9949	23.5076	37.8347
409.124	1992.96	3471.01	3336.67	1368.05	1993.74	1099.17	2267.17	4491.56	932.67	2103.86	1793.61	3383.9
204.067	2839.02	3135.98	3093.13	3833.85	3792.01	3135.72	1802.33	6538.3	2932.41	4780.86	4222.97	3442.39
205.07	449.949	476.846	467.859	687.038	631.926	432.707	289.382	917.189	416.636	649.608	595.979	581.607
590.004	28.5205	53.3644	40.0668	20.0046	26.636	72.246	29.1525	52.645	58.1849	70.5535	30.0319	38.7765
445.081	1543.93	9891.53	4743.07	1564.66	3187.7	11015.9	6303.43	10229.3	7310.16	6683.09	2246.22	4984.58
410.14	404.684	796.337	746.027	420.312	471.082	268.239	495.681	1049.98	270.512	571.857	460.71	888.131
450.166	544.072	1073.49	792.073	638.069	430.072	720.036	501.376	1629.54	612.998	923.963	765.032	623.069
512.215	809.361	1490.97	700.303	643.204	1031.74	228.279	456.375	848.402	382.726	256.188	554.133	628.109
245.097	1842.52	1776	2736.82	2027.66	1428.89	2201.55	1667.97	2906.02	2697.84	2152.49	2014.4	1850.96
231.121	1409.6	1357	2442.04	1114.1	1515.93	750.81	1660.84	1769.59	872.914	1154.28	988.774	2194.72
492.199	403.922	579.236	492.44	388.981	446.699	248.184	308.563	573.041	354.481	315.926	330.133	393.955
449.115	1254.98	2908.36	2361.45	844.389	1198.05	2767.14	1059.79	2651.74	516.771	1016.06	1314.83	974.447
246.097	291.768	1540.61	410.645	318.994	234.889	384.6	252.823	445.189	425.298	338.777	339.41	287.87
220.062	179.661	98.5887	107.459	140.282	180.752	75.7227	84.4699	122.929	157.114	160.013	167.564	160.935
244.333	16.6303	17.8824	27.1171	19.3682	12.5603	21.3242	19.0269	32.3038	29.8354	28.091	17.2475	18.1141
199.097	876.145	840.215	1638.49	833.078	997.787	415.026	819.776	989.717	529.947	836.241	608.044	1509.99
141.092	81.4553	102.154	124.336	88.3696	84.8328	65.0474	47.328	78.9689	50.6659	59.5013	63.4843	104.978
271.112	1294.36	2953.57	2096.31	1083.23	1313.88	588.899	1215.58	1463.65	733.146	978.721	740.938	1970.49
197.08	295.045	295.936	408.301	243.872	213.492	132.61	299.122	693.103	662.533	322.391	575.249	417.52
890.468	114.561	128.033	113.832	179.192	183.978	121.754	73.3368	120.537	122.388	176.666	135.949	194.707
262.118	118.836	329.716	143.455	291.673	146.493	136.589	87.4633	196.986	164.673	178.787	478.31	155.203
313.128	1520.03	2418.93	1814.24	1935.81	1999.02	1225.16	1182.22	2350.76	801.404	979.657	1069.43	1740.97
169.087	228.966	194.296	350.929	206.073	254.661	206.894	155.448	263.469	181.46	310.634	141.383	318.146
211.04	66.9729	70.0969	50.986	61.2765	63.2438	57.3936	62.6634	63.8016	30.9523	60.001	93.3927	72.8073
261.134	602.158	734.844	509.159	1837.01	715.122	627.851	292.676	808.384	781.73	976.901	2919.66	653.481
339.111	1554.6	3989.44	4303.41	1491.22	2196.3	774.999	2349.59	2485.26	1019.11	1159.3	966.329	3780.62
423.133	2090.53	3415.04	3579.95	1506.22	2671.67	1152.42	2272.01	3364.63	943.797	1343.91	1261.99	4310.65
249.081	553.559	841.052	573.33	569.978	562.995	368.154	360.732	786.801	382.845	538.637	490.701	733.372
285.041	218.412	397.893	571.368	433.631	246.546	149.116	456.434	264.885	131.997	217.016	162.829	563.197
278.104	185.538	216.727	196.408	428.044	255.203	171.717	118.642	261.508	379.952	147.991	174.536	150.952
275.127	526.291	475.717	709.971	556.131	617.797	421.198	499.684	1085.01	808.641	624.484	492.931	671.162
677.188	368.404	510.278	495.229	309.361	373.5	437.919	532.515	903.02	623.513	805.578	766.396	646.785
301.129	4468.75	2692.91	2318.65	2822.81	5166.74	623.828	2624.41	6548.4	695.795	2404.85	1047.79	2455.04
185.082	526.574	320.419	794.952	522.629	512.261	366.184	320.396	589.377	374.389	448.331	374.144	660.672
387.174	2067.94	2619.66	3325.8	1591.46	2195.77	1321.12	1482.8	2204.2	1149.06	1504.93	1278.88	2502.5
270.1	210.548	212.338	327.013	231.852	238.538	210.179	238.325	313.593	275.538	300.165	175.535	312
515.087	387.463	2046.26	457.397	307.641	266.278	646.129	284.992	886.322	211.285	274.941	291.908	267.041
656.203	384.516	357.204	384.291	273.227	304.644	301.925	280.138	715.751	458.634	571.862	748.422	486.52
329.123	1799.58	1849.25	3900.73	1628.32	1926.94	1361.07	1430.18	3157.49	912.224	1373.95	998.95	2945.08
296.052	671.973	8129.85	470.256	1213.27	899.477	673.906	233.844	1081.92	727.739	467.236	915.947	857.692
315.144	2944.11	7215.06	6060.37	2981.39	4733.28	1816.89	3063.49	4048.22	2203.38	3061.89	2050.33	5576.76
609.184	3998.62	1183.08	3062.65	3018.69	2903.11	1937.26	3223.03	7110.98	6853.55	8708.61	11050.5	5861.33
610.19	1315.41	800	1079.23	1092.94	1078.67	675.485	1082.44	2386.34	2186.33	2894.44	3594.88	1940.24
611.206	669.738	1046.55	919.445	725.412	707.243	371.429	715.076	1142.7	744.09	957.346	1148.59	1154.77
254.091	193.351	4026.25	474.912	164.55	218.213	200.512	679.458	397.52	380.003	246.838	152.188	281.522
267.09	1334.2	2775.07	3370.69	1616.52	2005.94	1140.67	1966.73	2396.11	1154.03	1442.57	1105.05	3781.3
311.11	1343.4	2374.93	2479.17	1996.57	1435.75	595.895	2069.34	3174.16	725.99	1071.43	922.063	2445.32
337.097	1570.09	3744.76	2915.21	1279.31	2010.33	840.048	1655.49	2275.16	827.27	1002.44	784.47	2783.54
163.077	64.3885	27.6381	99.8187	84.6184	89.8102	51.4324	45.3547	93.1698	57.3358	71.3057	76.5071	97.6192
400.999	73.5625	164.657	122.834	45.1063	62.8013	135.939	113.893	294.038	143.72	146.892	93.4513	80.2593
359.161	2031.66	1025.72	4059.57	2637.75	3472.51	1415.31	2628.53	3447.81	2134.16	2318.74	1805.93	4159.17
189.109	639.633	58.7048	530.402	968.23	1008.19	414.367	399.709	633.607	739.064	453.216	650.183	453.053
400.202	590.574	436.695	456.091	571.032	746.312	397.407	425.37	604.395	652.743	633.055	686.385	627.313
335.024	4373.47	5257.6	3246.21	568.62	2433.82	3923.86	5650.35	12551.5	1773.55	2189.02	3312.15	3389.42
437.147	1977.9	4258.63	4073.55	2139.61	3938.68	1402.41	3092.9	3013.86	1112.6	1691.72	707.365	4217.05
160.049	91.7122	16.5088	89.7653	105.718	114.358	71.9911	85.8154	131.219	127.742	74.4613	123.609	69.927
253.053	94.7297	862.322	816.009	352.168	350.915	627.658	1203.18	1616.67	545.446	496.272	410.206	146.835
334.012	962.056	5227.2	3248.23	615.739	933.562	3041.28	4445.32	9663.26	2734.1	2104.79	1446.39	1733.86
630.819	90.4596	61.8778	20.4971	41.2761	148.989	92.9884	33.8696	28.6554	171.539	76.2611	68.2667	42.3093
333.008	5054.91	28845.5	17908.1	2594.48	4644.53	17088.4	25256.8	54148.7	15614.2	12192.1	7814.91	9592.43
612.832	265.492	71.0229	68.3082	89.7915	370.641	217.802	84.0543	122.442	403.995	188.062	215.3	130.847
517.037	109.864	1189.3	55.7661	37.8806	67.6718	83.0256	25.1686	74.2016	35.0396	106.413	112.084	75.6996
945.548	172.041	270.383	91.2638	321.317	659.642	390.637	96.4693	93.5526	577.253	141.586	113.817	98.8313
193.053	269.19	423.756	658.404	595.703	543.393	316.565	141.055	512.588	469.605	638.671	353.243	762.978
837.263	549.1	942.538	380.785	213.452	391.952	782.249	467.594	948.796	132.21	408.45	535.978	676.32
415.816	161.882	16.6874	132.402	75.9976	136.171	185.975	137.995	248.87	39.2646	170.273	178.939	194.08
417.12	17768.1	1152.69	10262.6	7199.74	15922.2	20452.5	10498.7	24128.1	4395.05	18133.4	20257.1	18216.8
622.201	499.386	376.11	930.218	478.405	893.885	816.688	374.047	1182.33	205.76	448.337	773.081	421.75
309.101	1734.74	3891.74	4169.78	1835.46	2606.87	1066.17	2433.18	2971.8	1055.09	1551.56	1193.91	3976.04
418.124	4194.62	345.834	2462.3	1831.92	3846.09	4830.99	2605.44	5890.45	1077.15	4391.34	4738.33	4271.26
835.249	2738.52	259.449	1117.94	413.097	1733.06	4620.15	2268.4	5176.69	233.1	2176.19	3010.66	2922.1
836.252	1404.31	2041.99	531.823	252.407	913.23	2229.83	1165.74	2475.55	141.598	1028.85	1471.51	1404.96
255.102	658.159	9859.91	2594.84	940.049	1327.35	493.462	3739.25	843.142	978.303	1023.41	876.52	1433.33
485.181	1227.68	748.742	1520.92	1974.08	1930.41	2007	919.5	2123.75	1059.08	1502.72	2179.05	1676.55
256.094	167.782	1297.07	431.544	231.202	340.133	330.593	588.811	170.848	287.74	259.355	226.406	282.856
737.221	476.758	160.907	471.235	305.074	374.163	729.19	314.177	693.521	199.367	387.26	531.439	477.266
486.185	391.916	258.651	432.643	596.297	625.58	673.611	276.206	642.917	353.249	445.972	654.011	464.563
243.114	859.368	604.324	1865.25	1125.86	2446.54	1174.82	1419.67	1193.04	1096.01	1099.84	547.857	2089.25
956.483	862.976	293.879	489.226	569.363	1544.89	683.757	614.199	473.603	2013.33	1300.75	1123.23	1207.57
957.48	491.45	307.891	310.407	400.618	886.123	396.939	351.648	323.991	1159.89	785.694	649.097	672.786
715.229	3814.96	263	1980.52	931.178	2506.85	8828.44	2743.14	9648.3	734.483	2742.9	5242.99	3378.51
716.236	1658.53	4253.59	1004.88	438.404	1094.75	3532.1	1260.5	4078.91	362.601	1151.38	2492.97	1411.38
296.165	116.537	579.056	104.149	95.0115	131.887	213.558	91.5486	262.306	113.561	118.224	188.41	142.173
156.067	703.971	148.362	905.069	1158.29	1372.33	1890.03	497.364	847.499	1007.66	976.603	800.627	613.249
595.205	2802.08	10567	2095.73	1054.75	2417.67	11615.8	2460.24	13300	1671.92	2124.39	5581.66	2833.73
126.103	5.42222	37.9188	19.0427	15.9024	12.3717	7.5565	11.0312	11.1085	14.0381	16.1445	18.7607	15.8618
597.211	681.231	2743.8	921.939	606.16	696.117	1271.82	836.038	1813.77	320.456	541.502	719.288	1010.22
298.102	1611.23	4568.96	1405.96	1130.86	1775.64	3387.3	1176.5	3978.84	1443.52	1705.36	2775.61	1741.01
596.211	1086.43	5149.53	739.377	438.193	1010.75	3638.67	907.366	4505.28	640.598	713.49	1885.66	949.039
297.098	9707.47	31507.6	7867.47	6449.37	10693.6	20947.8	6659.77	24333.4	8824.29	10281	16513.7	10166
347.932	43.5741	50.3584	81.2035	81.6103	48.267	80.349	117.045	62.0385	35.3147	32.1826	114.338	73.9878
125.097	72.0067	52.9253	119.087	180.256	114.743	73.8043	72.0406	100.702	130.604	107.493	168.881	127.328
188.097	968.925	110.611	1495.68	2612.39	2214.45	2232.23	892.076	1508.75	1995.7	1693.94	1967.94	1535.24
397.17	547.848	381.018	676.322	1925.46	1188.55	428.36	415.278	586.422	960.169	929.355	1037.16	997.566
363.024	1918.32	8352.36	2163.5	361.654	1531.91	2800.06	4385.9	9076.62	1177.14	2706.79	2275.47	3306.53
367.022	118.428	531.215	174.416	76.2215	88.1522	149.952	251.793	410.933	67.6253	192.054	172.936	192.222
186.515	43.0699	11.5059	86.4654	169.011	95.6696	63.58	56.9772	101.849	91.1957	102.291	153.42	109.232
527.202	649.509	1351.34	1874.59	765.13	1268.93	595.154	1898.66	1340.23	622.79	771.086	560.23	1867.46
349.932	43.7831	57.7196	74.3409	79.9355	53.9264	109.048	42.6422	57.2248	29.0347	89.8291	131.341	65.5933
187.098	3989.07	346.838	7220.1	13878.3	8386.72	5581.01	4521.45	8152.55	9436.98	8283.89	12468	9671.53
538.111	149.622	226.599	172.995	169.107	139.735	223.359	178.096	312.137	192.812	198.115	270.635	223.842
209.08	102.508	90.648	161.878	454.324	304.092	170.71	94.2216	136.071	335.825	323.622	236.121	230.543
529.067	3348.04	21228.6	6092.53	5161.39	1503.44	3007.41	1685.43	4501.12	1145.57	1990.05	7503	3338.93
229.109	1201.08	709.541	7119.95	1066.32	2755.56	1018.29	6906.53	1979.82	2664.11	1678.22	1153.71	4704.19
539.112	368.908	831.631	432.406	418.898	276.397	359.263	216.14	517.263	251.012	305.417	362.921	535.123
230.109	212.394	74.3394	893.327	211.267	389.536	274.641	846.254	328.655	429.494	216.825	206.61	627.142
530.072	929.189	5443.84	1586.09	1341.47	376.993	748.687	470.155	1217.32	352.567	591.178	1857.21	888.733
809.387	85.1205	354.93	145.272	361.017	197.946	128.43	147.837	768.179	435.016	674.846	185.746	324.615
218.021	169.112	43.9122	86.5065	86.651	33.5916	52.9485	97.9114	149.45	42.0751	64.1756	141.264	110.875
217.021	1798	283.863	912.672	839.042	269.118	452.432	924.709	1480.79	521.031	562.754	1470.93	1103.61
144.046	375.45	60.3875	373.156	312.322	387.534	164.663	460.322	452.75	509.298	475.598	464.037	576.177
293.106	740.053	1413	1518.93	1176.32	1217.34	603.988	1146.67	1346.89	800.31	918.034	1110.54	1769.11
287.023	105.85	74.7402	74.3157	99.3912	117.572	114.017	125.429	175.199	132.73	131.181	174.112	132.552
227.093	278.991	536.542	696.893	820.012	1168.45	562.335	1748.74	430.116	854.624	1222.4	311.121	1531.12
228.097	44.0019	23.9736	93.767	119.665	160.441	75.0415	238.374	60.9422	123.399	165.843	56.8764	192.707
290.089	213.242	2126.86	575.108	494.29	745.577	413.034	401.583	472.938	487.001	539.978	229.769	502.976
605.226	996.361	827.886	1839.47	469.221	445.069	481.348	1102.24	1097.06	287.769	710.63	800.347	1776.75
221.082	153.349	65.9629	280.062	888.995	498.543	421.11	181.82	254.944	458.784	263.807	468.815	325.013
404.063	1308.29	27.8805	752.165	239.031	246.044	218.114	237.206	617.613	201.855	370.173	828.275	403.769
580.225	652.468	363.385	998.969	289.582	346.789	187.271	726.291	1412.49	446.988	347.228	1010.36	723.765
375.171	755.755	1550.24	1852.65	1497.65	1273.1	664.029	1097.43	1205.39	1921.23	904.123	1716.82	1716.99
543.195	763.504	176.451	1089.16	647.186	573.233	420.788	627.244	717.629	364.108	478.974	459.201	925.196
442.011	231.833	5.8476	195.119	91.3338	76.8406	119.14	103.046	203.173	84.5213	191.445	200.299	127
280.983	1830.15	13.9362	953.079	135.144	32.8204	157.813	171.574	749.121	89.1295	309.705	996.451	315.504
283.912	496.395	53.7014	397.455	31.2619	24.0576	39.9624	150.363	320.698	19.4613	183.258	409.549	300.686
200.89	235.984	60.1368	202.936	80.0137	29.2609	56.3979	95.7028	176.722	60.2198	101.07	192.383	154.457
403.057	6324.81	114.067	3537.6	898.778	996.199	628.829	868.898	2764.52	565.392	1416.74	3666.21	1491.3
441.01	623.605	4.65408	437.431	234.82	76.7055	200.556	175.01	426.702	181.507	393.641	424.281	282.205
579.225	1554.81	482.313	3072.52	478.271	1317.46	275.448	2012.21	3817.43	723.775	663.051	2769.65	1980.94
517.182	1188.41	1218.98	1661.33	700.014	629.367	414.178	848.061	1103.04	392.347	534.528	540.175	1325.74
660.005	343.98	5.69528	130.282	21.0988	3.38706	35.7717	18.0345	144.037	24.6162	128.433	216.892	111.777
205.021	372.737	29.3492	316.48	142.673	65.0648	101.776	150.315	330.525	80.4853	171.95	300.942	183.723
533.186	914.14	322.121	1280.69	547.518	528.92	375.824	701.872	892.829	353.086	638.654	518.863	1200.38
589.22	1314.99	1578.46	1977.17	689.332	548.821	455.626	1081.75	1355.35	349.091	571.682	725.417	1665.39
427.036	2335.09	40.0873	1454.98	711.241	178.635	670.764	582.895	1434.23	426.507	1093.25	1661.48	959.661
425.036	18393.3	93.0528	11209.9	4655.36	1434.3	4704.65	4208.79	11795.5	2810.3	8277.99	13810	6959.96
643.028	671.412	1.40477	276.376	69.7956	22.7832	125.152	60.6311	284.55	34.7533	214.17	454.055	145.297
204.023	1900.73	18.1841	1578.75	481.645	168.891	402.87	607.866	1477.49	306.858	705.768	1391.32	942.32
121.063	938.756	196.125	800.493	302.541	177.003	242.466	385.048	705.5	166.745	402.782	733.062	515.179
661.256	1147.97	6099.89	1655.6	633.644	672.392	410.892	1031.11	1235.43	505.446	711.648	643.5	1462.68
426.04	3465.63	36.5776	2250.82	979.717	335.294	928.317	854.957	2167.68	598.006	1582.04	2717.94	1387.04
631.245	1134.43	31.9548	1619.4	608.593	685.131	440.243	957.506	1290.1	452.862	583.955	681.226	1388.13
122.068	94.5961	44.3903	81.9293	30.1626	17.1308	15.4748	33.0199	67.9545	28.4065	41.9922	96.5636	60.3831
590.216	534.583	55.7683	725.984	318.779	294.208	231.379	498.067	602.001	241.348	325.865	487.348	691.28
202.026	34792.9	6461.5	27224.5	9011.12	3181.45	6901.6	10838.7	25179	4957.03	12961.3	26124.4	16884.8
203.02	20914.7	3870.73	16568.4	5302.68	1980.77	4209.89	6505.77	14796.1	3069.1	7741.52	15634.1	10071
200.396	3657.39	708.221	3020.36	991.198	344.624	740.156	1102.71	2776.76	549.688	1358.1	2827.19	1790.88
201.023	299099	49358.5	236425	84128.1	31831	67145.5	102341	218453	50391.7	118716	224566	152553
174.058	70.5336	42.733	142.482	51.6563	50.0306	104.791	73.8773	187.131	229.609	243.448	178.434	237.977
811.215	354.633	482.595	310.162	229.46	141.125	128.344	264.477	446.247	185.697	304.369	529.339	393.754
79.9605	156.835	68.008	140.562	50.1702	23.1883	39.627	97.5081	124.498	32.8653	74.1907	120.231	95.9734
459.142	1778.85	149.537	6323.52	1126.62	914.652	938.193	9689.65	1758.01	893.721	2292.62	1125.58	3655.13
460.15	607.881	48.1164	1585.36	348.28	311.677	333.685	2356.6	528.308	301.078	679.266	338.958	985.938
487.007	289.406	4.88868	106.871	131.668	34.5634	120.088	41.2323	165.753	98.0623	191.1	193.389	115.546
559.198	1025.68	80.9916	1170.02	716.684	556.246	376.179	680.81	821.476	382.082	615.467	598.383	1129.11
199.805	230.342	15.6365	326.157	106.96	45.9831	188.825	333.408	232.37	29.8237	200.222	245.696	224.223
575.217	1422.47	985.215	2825.53	629.576	626.414	470.685	1097.89	1653.84	341.462	718.157	734.098	1780.64
571.205	832.085	64.0414	1018.72	612.208	647.228	424.983	780.891	855.967	364.27	535.957	488.102	974.199
197.808	461.334	17.1125	667.464	212.493	77.3673	367.109	663.878	509.083	41.6524	390.225	458.934	360.188
195.81	380.897	24.3912	554.232	158.162	65.2962	265.462	512.039	381.817	33.5589	311.353	407.574	334.88
535.127	301.692	219.812	492.574	206.622	204.184	197.243	205.86	318.828	147.862	245.813	221.238	356.448
603.211	1630.6	12.1978	2264.13	760.593	591.102	411.122	1095.15	1353.66	454.105	662.22	670.317	1599.62
201.404	464.273	22.7649	312.499	143.349	50.2563	126.38	162.503	379.061	104.741	182.117	341.001	244.605
573.222	1262.97	117.158	2000.43	765.214	709.842	493.396	1143.8	1337.74	472.217	754.516	643.347	1770.96
269.01	566.273	1.81403	265.997	432.13	328.832	311.785	152.775	372.59	307.878	460.009	499.141	331.39
656.802	61.5393	0	7.56657	34.3097	31.4635	41.0552	24.3313	40.649	31.2071	72.7087	58.6146	62.7514
473.123	574.025	96.2847	432.704	379.241	599.848	565.142	542.529	639.416	439.991	424.262	512.701	636.36
534.166	488.886	254.211	496.192	299.456	283.365	235.209	371.951	441.321	237.082	327.142	357.82	526.629
601.214	1067.41	33.1708	1449.74	641.356	578.944	420.018	822.255	1130.07	458.396	676.554	695.57	1328.92
258.99	102.646	3.56245	87.0567	160.766	124.458	181.649	120.031	142.436	139.034	144.622	148.495	127.762
604.209	747.396	406.889	695.148	413.685	336.752	270.529	464.184	680.641	236.464	341.597	523.908	734.924
574.216	672.707	702.551	786.366	368.871	421.762	254.347	471.521	586.921	343.801	449.433	423.684	748.284
186.114	84.4393	15.8377	100.051	202.709	219.166	196.522	58.67	244.08	212.04	323.478	107.158	150.998
330.981	189.276	45.2219	160.405	170.105	82.5183	145.641	52.7171	194.834	147.239	198.259	164.341	110.935
577.209	1031.27	200.982	1321.54	597.627	673.828	430.688	1082.6	1220.81	390.502	553.912	868.757	1103.31
919.873	167.224	0	33.6156	121.512	91.3363	160.875	9.29215	56.6204	117.254	19.4707	83.5932	24.5111
395.007	129.47	3.28659	222.097	128.528	83.2116	444.415	242.165	465.011	120.834	262.819	248.523	247.116
391.958	143.61	8.20041	266.005	121.587	90.2959	125.816	258.462	148.907	60.8924	143.263	139.787	151.822
145.084	175.853	55.2135	151.141	242.829	309.685	154.763	137.51	168.849	290.564	185.701	189.57	228.547
587.212	1387.27	41.4614	1801.81	669.391	663.743	532.621	890.062	1490.87	400.484	597.304	778.998	1480.1
259.817	64.6668	8.89635	75.848	30.6951	25.9592	94.4431	43.412	75.8282	9.54546	75.135	56.0075	73.8261
137.025	579.257	46.5472	385.556	160.935	421.711	362.864	1451.6	1267.31	538.018	897.066	578.97	1368.52
93.0349	19.4558	39.3805	8.99997	1.28841	17.4651	13.9875	42.2252	39.3525	16.5063	18.3186	19.5719	49.8748
361.028	146.807	22.556	86.9149	47.9442	100.353	127.69	105.328	180.074	96.1539	230.673	163.311	183.388
255.822	214.624	3.52717	216.296	150.745	82.377	212.647	195.957	208.203	42.2952	169.401	223.422	202.617
629.214	867.95	49.5823	1053.27	626.826	499.251	448.171	677.011	943.364	584.152	453.637	717.94	1064
257.82	209.441	11.5086	237.847	150.676	111.751	237.364	229.235	187.463	58.8232	207.343	217.249	207.951
592.201	682.044	300.574	750.646	401.75	372.091	290.605	452.378	786.557	295.56	380.681	442.875	725.299
433.971	144.289	2.29238	215.45	91.4057	64.4941	97.2721	123.553	158.023	31.5384	120.672	71.4673	180.584
285.035	117.307	36.714	226.146	139.094	210.929	83.6562	142.978	234.763	144.649	160.117	96.2923	298.36
671.804	107.201	0	51.7025	112.461	61.3882	53.322	27.8908	60.0997	111.881	104.985	93.8447	75.2351
648.802	70.2262	7.00947	45.4562	75.1197	35.9383	41.2243	38.5052	73.865	80.9947	79.4337	102.735	77.5067
138.024	97.7827	48.1421	134.201	101.18	152.821	106.149	200.513	174.984	136.065	163.599	146.347	213.891
143.076	299.185	70.3983	231.942	293.671	447.486	116.079	146.203	220.318	311.93	83.214	217.179	169.174
319.043	59.1603	61.4866	228.276	88.3021	40.4641	42.0946	129.182	117.086	202.951	163.538	46.5448	159.259
191.061	85.3676	24.7311	120.671	147.386	112.838	123.757	110.121	114.738	123.22	95.7149	111.551	96.1081
222.077	532.875	162.255	732.524	888.73	858.896	848.931	364.589	517.295	859.824	746.573	567.563	530.586
190.052	562.381	105.952	800.63	887.889	850.119	925.668	378.921	643.456	801.483	847.183	659.241	561.557
818.397	414.439	249.951	483.903	478.409	563.021	298.942	298.549	366.953	479.037	371.258	407.092	504.372
311.027	37.2406	25.6629	93.3895	36.0004	55.9476	99.3738	102.042	253.18	64.2499	93.3518	52.2071	181.948
249.039	301.867	32.1303	399.173	2344.04	516.713	287.012	286.087	414.789	233.287	265.21	4446.89	403.518
705.251	1096.91	540.215	1299.72	611.688	705.573	438.145	784.076	1104.98	384.304	530.057	789.4	1224.01
199.098	701.044	54.5769	879.109	838.935	764.162	607.229	460.215	602.764	756.06	540.504	549.922	737.182
783.322	532.138	112.811	731.835	448.599	446.472	261.997	594.919	709.623	275.702	347.549	395.541	686.985
663.243	1274.53	801.57	1785.3	715.42	821.142	485.447	932.895	1569.52	452.502	590.436	717.226	1389.61
527.09	283.388	370.62	270.891	335.885	247.42	337.881	363.249	337.752	248.836	374.977	324.752	385.143
932.971	106.882	0	17.6027	50.0618	98.3682	93.7735	27.1793	20.4338	218.995	59.469	80.7509	27.2843
337.038	930.512	14695.3	4480.57	678.232	588.436	1198.91	1273.02	5152.62	495.808	1980.86	2680.8	794.347
339.032	151.505	20.1834	435.508	79.2006	101.062	132.238	151.666	472.653	82.4788	229.243	302.261	188.263
352.016	178.964	287.918	248.595	94.3051	169.826	158.785	192.521	537.884	142.961	305.322	163.294	237.384
722.264	449.018	11.7914	648.884	334.251	468.538	249.153	463.223	655.195	225.245	379.693	514.934	618.276
651.211	791.805	811.726	1277.51	508.529	570.647	551.906	718.122	1270.85	275.003	526.437	607.67	1158.65
713.225	263.007	5.85528	520.114	319.936	336.967	260.595	345.752	459.119	131.646	305.171	337.69	451.929
736.904	32.572	11.8964	9.73689	29.7181	95.8029	39.1591	32.9103	16.7023	137.571	34.4882	46.8358	19.2252
687.215	716.142	5.7759	901.698	372.593	303.481	372.681	550.799	782.566	321.842	563.946	615.8	824.139
501.11	356.07	168.858	557.37	310.449	286.439	402.639	227.713	584.291	228.506	294.728	298.605	474.712
351.014	798.715	79.5267	1067.05	235.623	819.408	879.756	1580.32	3749.26	558.555	1629.39	912.614	1030.14
608.206	640.279	35.1975	578.13	376.731	384.995	299.617	424.467	664.977	263.282	328.945	532.776	646.613
749.279	940.635	16.5169	794.764	441.145	441.911	313.149	518.316	727.101	305.926	487.438	510.688	760.5
694.256	419.622	302.887	710.251	425.657	560.649	298.011	428.1	701.644	311.488	385.987	422.33	692.731
682.246	380.299	320.903	537.593	346.207	421.232	293.125	423.261	591.544	279.288	331.334	336.198	476.965
607.21	948.301	81.2515	1523.72	700.159	595.391	483.408	927.94	1235.41	476.458	572.763	965.229	1151.71
635.228	1075.24	99.4946	1652.63	580.145	739.819	605.041	932.367	1495.6	373.41	700.882	602.367	1572.72
790.828	94.4539	15.3944	17.1258	90.0349	36.2464	18.2301	14.4678	514.456	180.157	153.331	70.9483	78.9238
707.251	712.634	458.562	1246.38	498.836	682.21	369.401	709.88	1047.79	248.427	515.345	530.524	1259.35
738.278	384.948	415.847	551.249	294.576	356.829	246.067	343.845	538.899	217.333	316.619	959.671	634.526
265.111	1645.4	44.1267	3766.3	1520.45	1892.07	1025.91	2091.96	2885.92	1101.25	1536.5	1111.74	3747.46
709.242	767.637	85.4615	1363.52	529.492	710.765	506.363	856.279	1373.41	313.109	588.95	634.598	1543.98
637.219	765.284	47.7209	1326.71	513.296	695.067	451.745	702.091	1472.22	292.058	545.092	612.736	1279.3
613.131	220.924	1.35507	266.095	126.055	220.673	153.671	127.986	259.965	116.675	186.656	139.298	278.645
710.254	607.375	275.962	648.227	333.187	445.653	274.153	432.227	659.497	229.899	350.605	451.943	594.636
712.251	425.906	47.5286	546.715	315.82	348.82	230.539	323.739	548.845	201.885	285.641	303.736	466.299
419.013	92.325	2.24153	132.401	65.1897	111.503	83.1859	98.3067	210.989	71.499	119.618	119.138	122.935
723.252	576.097	33.8373	1260.89	406.387	546.938	361.798	769.31	1143.36	222.371	487.781	472.185	1259.22
751.272	656.493	43.5017	1313.17	346.875	482.287	385.152	714.564	982.951	252.447	466.866	429.276	1184.67
721.26	844.341	53.0354	1338.58	528.571	670.167	465.045	879.679	1315.36	308.962	523.941	499.087	1379.31
725.256	471.623	149.687	862.427	370.75	560.389	345.487	663.437	893.149	211.595	388.601	337.093	914.594
266.114	276.918	55.8354	551.133	229.093	296.739	155.424	305.632	405.156	201.566	262.377	205.728	547.366
612.163	548.376	319.713	745.282	289.968	526.171	258.491	437.816	748.343	176.681	426.432	362.151	772.126
697.256	563.895	519.352	710.289	480.316	528.024	443.943	605.677	1038.44	292.896	360.003	796.905	779.448
854.354	259.149	361.146	441.349	208.276	342.717	187.658	242.542	463.782	170.39	288.712	273.205	449.513
708.254	509.052	35.0088	721.525	368.404	425.461	243.877	392.187	588.351	217.294	377.761	317.165	601.357
623.218	724.376	806.028	1158.48	602.023	786.557	370.378	691.895	1078.45	384.874	518.049	568.308	993.761
739.267	564.542	2030.06	876.165	363.486	511.777	352.932	551.961	927.681	255.767	395.662	730.001	908.552
320.039	1382.37	58.7453	1549.55	652.609	955.116	934.851	995.151	2739.87	394.736	1366.9	1901.9	1466.05
681.243	739.206	76.3673	958.54	426.193	581.885	398.01	499.624	1075.99	264.98	405.457	557.855	1126.45
742.268	371.172	1081.79	402.066	283.207	349.813	152.192	434.889	484.593	183.3	225.317	347.995	461.3
322.047	23725.5	15241.2	25473.7	10133.9	16721.9	15708.4	14809.1	48262.3	6779.27	22222.5	32843.2	26099.8
324.048	1529.03	1024.33	1682.08	700.624	1136.16	977.312	1058.86	3052.34	472.908	1423.03	2037.47	1794.47
321.044	131074	77491.1	143946	55577.1	92474.1	88615.9	82870.6	262506	38488.4	125591	183415	144040
724.257	470.856	16.222	550.024	305.007	384.731	216.912	385.169	550.789	171.256	271.516	521.21	600.964
323.044	9961.05	401.095	11061.1	4276.44	7133.36	6819.57	6653.32	20038.1	2869.78	9487.83	13731.3	11139.8
680.248	556.486	25.7396	829.922	317.072	520.873	274.998	524.038	635.732	240.922	360.527	423.093	800.879
816.367	416.105	312.145	562.705	407.06	359.613	312.716	218.621	626.939	178.374	484.434	293.807	724.556
420.972	197.87	0	200.314	117.874	167.486	146.661	164.966	222.486	97.0354	243.533	257.87	151.672
711.257	512.169	111.722	882.314	361.777	464.315	365.545	582.929	850.439	237.944	382.433	424.612	891.498
324.458	141.115	35.4616	157.281	63.5858	102.41	94.2758	107.923	265.064	59.7725	127.829	188.618	179.189
389.036	1124.56	85.7681	909.034	678.508	1096	1013.28	486.591	1436.71	546.959	1326.71	1402.38	985.014
231.159	111.661	10.8241	132.268	107.695	139.999	82.2533	92.7688	115.493	142.591	137.03	63.7912	163.558
753.275	619.259	445.434	1184.39	429.044	535.269	387.268	699.988	1278.02	417.557	636.588	727.831	1231.98
343.026	471.809	8.10255	336.764	316.64	451.091	458.926	217.163	601.404	268.951	592.191	562.031	375.457
679.239	1157.82	583.21	1685.7	558.336	938.239	583.151	1021.33	1745.81	397.934	763.362	644.416	1805.32
344.029	140.997	11.1239	146.787	126.729	149.44	95.8174	54.357	180.666	92.9031	184.03	172.525	133.119
379.004	332.698	30.3465	264.002	226.072	402.209	414.338	229.755	449.909	198.677	376.759	362.985	209.538
381.014	253.32	25.6771	171.666	120.763	219.907	161.825	249.535	329.731	159.662	269.553	267.427	187.573
457.021	121.775	5.84611	101.008	76.8997	74.965	112.788	43.7189	128.605	75.292	145.944	145.143	68.7786
282.103	249.382	122.63	381.955	434.748	385.979	158.151	250.323	333.21	457.307	273.287	217.641	391.567
262.096	127.424	30.0952	197.975	169.852	131.989	154.141	92.0244	151.796	134.376	123.679	182.68	101.611
235.067	188.93	338.08	243.336	196.233	260.53	88.5575	157.409	195.217	135.303	111.202	203.048	259.93
261.091	616.908	33.5525	941.771	778.547	657.765	730.428	437.533	785.448	854.394	589.21	628.295	481.118
391.033	190.589	17.2415	157.745	120.296	179.472	134.325	102.681	182.736	99.3559	172.728	187.494	230.895
281.106	1043.43	144.029	2346.72	1027.58	1241.22	699.515	1383.09	1741.18	857.327	992.646	702.252	2343.64
593.205	1116.57	228.665	1026.81	758.869	911.115	551.096	989.22	1347.38	559.872	798.387	1077.55	1566.99
229.017	1366.76	9.91246	903.105	221.172	265.719	490.908	1259.82	1892.22	211.72	778.203	2103.51	1363.82
309.034	113.521	167.353	111.823	152.319	55.0726	107.772	82.1946	200.695	118.716	137.608	124.916	96.37
575.774	37.7501	3.92101	30.389	36.0106	21.0108	19.6008	10.9502	31.8222	17.2539	49.5703	52.2067	32.0539
214.139	456.075	35.0111	443.302	585.59	487.539	476.521	321.675	465.738	760.257	602.435	617.285	500.614
189.112	238.058	22.4733	206.832	275.899	261.019	202.154	120.533	235.117	264.347	272.527	230.069	181.116
263.113	343.516	196.894	424.475	412.739	435.87	245.411	314.977	474.261	357.709	312.226	384.528	444.687
171.103	812.636	48.0106	803.545	1066.53	957.111	835.195	482.411	828.666	961.573	1025.93	998.246	785.682
404.198	497.28	50.6452	858.059	343.208	638.072	280.685	541.411	701.536	259.115	341.701	367.386	889.565
257.139	1859.14	99.5808	3687.67	1678.29	3747.97	1007.47	1962.54	2416.58	1002.49	1613.24	966.398	3609.88
258.145	338.169	25.2565	583.716	291.12	654.965	349.876	332.024	402.793	263.056	309.296	215.823	575.831
240.138	98.8189	40.2795	101.15	117.146	116.769	73.645	76.703	99.3595	117.501	113.023	118.883	110.32
403.196	1761.76	98.282	3824.74	1127.25	2715.07	1114.1	2139.87	2920.35	812.686	1299.81	882.609	3844.03
325.127	877.586	2377.85	1650.76	809.2	942.207	625.004	928.893	809.661	585.299	764.534	776.411	1626.99
134.063	74.9897	44.7918	44.4897	71.3189	105.357	36.6488	29.2953	57.3406	82.3595	41.6859	64.048	36.0615
252.095	193.49	15.4591	232.657	147.031	181.243	133.199	244.623	183.163	243.127	268.4	162.211	200.197
350.009	458.133	60.7542	1043.59	305.583	402.126	1100.42	1986.47	3464.27	776.769	755.607	715.326	720.926
178.051	223.364	39.7293	139.148	239.237	309.112	121.584	106.234	165.781	270.024	131.563	191.678	142.63
349.004	2132.39	128.747	5535.81	1406.5	1922.45	6115.77	10784.1	18787.5	4221.27	4104.6	3848.67	3884.42
940.448	230.929	201.595	275.665	252.22	336.506	171.372	172.703	228.943	260.214	158.814	229.5	213.333
964.018	21.6779	0	54.9759	44.6685	11.922	5.43531	17.3837	43.6903	110.217	163.45	46.714	71.2245
329.159	1584.14	105.058	3018.38	1271.51	2098.36	781.664	1704.95	1975.77	1112.15	1115.42	1077.33	2946.21
198.114	137.503	8.38352	88.8363	167.164	123.564	153.517	87.2848	185.948	195.19	108.328	172.316	95.1876
640.208	397.762	39.1856	554.397	546.047	436.68	276.761	451.821	751.019	484.913	580.788	729.737	753.598
159.103	587.426	25.5661	402.711	509.755	642.792	520.162	460.304	2303.03	1535.19	1101.26	929.937	771.346
160.105	56.4263	33.4767	44.6889	47.4526	59.5086	50.9237	46.0191	215.423	147.793	104.129	93.0649	72.3275
155.102	263.918	67.0434	196.149	255.617	247.843	87.0446	157.601	186.509	224.018	103.974	184.89	144.238
331.165	1303.48	176.926	1612.73	1424.15	1382.4	684.061	1008.76	1482.54	1691.44	1005.67	974.705	1581.46
139.108	64.1149	39.1384	88.0304	62.0594	58.3095	43.3715	46.5082	71.0942	45.5934	45.6362	55.0337	76.7746
202.117	649.024	21.8684	1003.8	682.847	611.698	476.888	471.293	693.578	389.999	585.349	217.081	859.305
201.114	5344.87	167.74	8648.72	5759.66	5299.27	4071.23	3954.34	5956.58	3344.15	4905.19	4872.53	7172.33
209.096	262.613	55.6869	291.823	541.993	265.444	362.992	217.907	302.385	278.664	337.482	500.015	297.021
200.488	58.443	32.9062	102.908	68.31	61.3665	43.5261	44.5726	77.2202	36.0933	53.9299	71.1967	82.6406
489.233	895.046	1900.36	1828.88	937.545	1306.79	656.596	1214.73	1551.97	441.222	785.372	674.968	1721.35
527.28	525.895	1863.94	423.824	565.528	676.254	181.15	356.352	432.491	377.012	294.779	414.137	401.392
371.171	1364.79	349.456	2896.46	1201.72	2015.4	844.593	1708.21	1898.31	859.366	1452.8	920.553	2750.44
273.134	1575.88	55.7705	1365.61	1252.85	1371.4	429.297	1150.05	1371.98	1284.24	588.083	976.983	1365.45
223.085	501.993	85.3896	524.757	600.109	549.946	476.88	298.128	577.08	360.535	530.251	593.948	481.939
255.112	627.954	77.8362	752.374	635.702	665.329	359.235	432.79	678.978	758.234	494.703	509.443	752.865
395.169	716.812	374.721	1273.99	1018.87	1314.78	702.02	910.198	1114.17	544.149	770.393	643.896	1284.13
411.079	4558.21	135.4	3056.33	1212.75	1631.56	1913.6	8042.29	15533.4	5598	2695.96	3683.52	2392.29
412.085	1052.07	66.6241	723.947	352.389	411.074	489.875	1790.86	3425.97	1265.42	647.566	827.999	640.994
437.177	929.788	446.237	2277.63	1384.5	1899.5	856.151	1680.87	1768.03	719.022	956.867	734.823	2182.51
335.125	739.841	497.943	1064.84	671.909	822.352	406.447	756.622	1213.73	709.334	792.13	837.105	1108.87
435.174	784.272	361.656	1622.51	948.627	1264.16	639.193	1190.99	1277.77	534.399	746.138	501.349	1614.3
312.171	257.961	66.0947	361.348	307.49	322.16	102.38	171.777	297.005	322.346	207.783	306.144	325.627
423.165	1201.84	468.396	2603.2	1308.39	1918.33	1006.28	1889.52	1977.53	615.167	1071.44	748.054	2840.12
530.28	490.736	14029	606.882	612.178	835.988	415.125	251.358	1294.16	295.917	471.233	1038.98	506.718
304.208	178.535	129.446	224.977	167.023	256.038	267.941	607.946	1184.28	570.012	848.242	1245.12	393.849
445.208	1339.61	104.014	3659.12	1412.03	1919.59	1011.73	1660.18	2226.89	855.656	1346.66	1046.15	2658.69
302.272	9.63317	115.861	13.4437	9.607	12.7244	15.2465	29.389	65.9508	27.9094	41.7707	67.1029	17.3087
531.27	613.228	6280.47	1511.54	750.649	929.68	459.587	694.982	1028.26	382.232	677.866	765.96	1046.43
227.125	607.53	19.9029	1396.04	573.948	748.437	261.303	2009.4	681.008	642.427	450.545	439.646	852.984
425.172	847.327	232.032	2294.01	1022.43	1193.6	628.73	1155.15	1518.2	497.465	997.355	1014.49	2053.17
389.181	840.437	64.889	1386.89	1623.31	1128.4	877.264	1338.8	1960.77	699.818	995.969	2227.87	1453.41
303.19	1175.25	221.559	1343.31	986.454	1358.69	1856.72	3211.29	6564.42	3152.49	4784.52	6936.13	2437.68
225.113	366.832	23.3251	349.186	427.572	410.369	149.243	205.845	492.995	674.524	338.888	472.237	347.055
376.134	359.164	17.7226	482.766	402.617	552.88	275.484	294.436	500.34	257.86	324.289	204.149	462.58
654.324	549.412	39.1227	430.634	559.823	928.483	165.375	491.065	617.267	624.134	213.294	383.491	386.372
548.266	430.956	3507.96	492.037	398.378	571.946	218.144	401.702	512.243	315.276	287.038	340.774	503.044
381.157	1060.02	249.852	2611.79	1396.06	1666.8	864.683	1367.06	1879.95	609.082	1094.24	795.689	2537.05
241.064	743.68	40.8853	1516.1	669.924	872.696	484.666	736.213	1158.65	501.468	755.061	475.815	1620.25
283.154	1006.42	79.226	1672.86	1068.11	1220.04	481.793	907.142	1286.82	848.372	901.048	626.97	1641.78
299.147	970.067	190.776	1737.49	860.43	1544.27	751.71	1493.04	1506.25	664.42	859.575	780.501	2281.49
351.147	1758.62	118.441	4431.07	2071.71	2474.42	1213.35	2374.51	3439.36	1080.87	1777.88	1345.29	4212.82
459.222	1040.26	82.8955	2335.24	975.961	1624.65	770.136	1429.83	1728.67	533.842	1036.61	614.349	2136.09
275.007	527.148	17.7146	1580.22	152.49	148.046	132.989	228.336	378.643	147.63	809.948	704.635	1211.27
431.198	3082.68	94.1447	5510.33	1360.48	2287.52	1141.7	3100.75	4312.27	1130.36	2029.3	1209.8	4685.95
355.033	95.846	14.0999	203.89	90.234	42.531	78.259	70.3481	208.349	40.7644	104.361	185.266	139.252
377.132	1531.48	141.849	1845.99	1517.61	1444.7	1051.24	1320.7	3358.38	1657.17	5078.68	2093.82	2655.83
378.141	382.86	42.5163	488.528	393.038	399.101	292.275	312.99	818.493	461.636	1274.15	520.85	732.594
256.094	203.455	34.1642	167.068	179.607	194.587	157.428	101.63	211.585	185.097	271.276	187.833	217.717
315.015	72.1294	30.7536	146.622	82.6436	109.592	57.0104	55.0217	160.065	54.6901	87.4917	75.6978	172.307
236.096	329.221	34.1483	435.819	1291.6	514.929	322.091	262.293	480.123	327.209	537.437	560.834	491.371
183.103	250.85	25.5837	230.63	283.705	267.698	188.289	193.757	247.707	270.351	245.257	285.261	249.927
295.122	1644.71	147.461	5665.62	1852.45	2487.75	1307.12	2826.4	3854.95	1146.04	2230.72	1703.64	5226.12
683.395	121.875	5.39209	202.509	193.151	152.566	111.671	107.358	197.244	210.701	281.672	129.123	308.616
296.124	275.01	154.829	937.658	326.662	402.577	214.007	433.519	589.479	205.476	384.959	733.626	822.033
188.073	725.144	95.6569	725.153	1036.13	887.448	733.69	613.252	1568.79	1441.12	3314.9	1561.2	1916.06
234.081	95.7407	26.0713	120.977	110.293	105.663	78.137	92.1732	182.64	134.165	330.761	166.25	219.748
294.067	1006.76	76.8871	2428.56	993.049	1078.48	703.853	1131.79	2239.72	767.989	1915.47	808.833	3037.94
243.16	515.582	40.2391	1176.38	443.698	648.261	366.388	653.862	852.788	341.634	614.597	346.784	1039.99
244.162	89.946	24.9994	196.455	83.0204	110.101	59.9136	98.2449	139.733	60.6091	106.762	60.9932	174.115
416.202	312.629	50.45	623.057	415.746	399.649	341.555	417.96	890.798	635.478	452.666	438.078	599.707
419.19	1620.28	121.348	3078.62	947.288	2250.78	922.735	1464.63	2271.85	491.548	878.082	608.027	3314.19
149.061	339.045	111.697	239.102	156.012	159.327	192.828	146.944	785.669	82.3184	624.5	397.231	416.767
245.175	184.577	20.1975	305.953	178.875	237.046	135.322	190.729	276.06	145.95	243.128	115.649	351.594
189.081	178.966	50.1188	241.889	217.105	203.913	145.62	157.907	326.633	226.998	497.657	288.914	385.368
415.197	1392.95	89.2303	2813.68	1257.82	1430.06	1469.69	1970.57	3675.13	2155.3	1596.81	1119.21	1994.54
510.259	183.582	2565.38	166.018	153.714	135.232	51.02	103.202	168.926	92.5635	122.947	554.987	207.679
207.067	198.96	46.7474	424.96	219.807	226.289	166.392	312.477	395.075	180.943	308.591	312.534	447.018
429.195	1359.56	51.4034	3438.13	743.016	961.167	493.58	5579.47	9738.26	6116.99	3775.42	5520.86	5313.42
430.199	337.978	20.161	763.527	244.523	279.671	130.869	1367.51	2454.04	1547.02	947.997	1312.3	1286.43
427.183	1459.4	51.5186	6786.66	665.576	615.783	600.987	1247.29	1830.68	712.415	4383.58	9987.17	6533.13
428.186	342.372	18.9657	1731.1	179.971	200.947	93.4113	299.919	436.165	220.149	1092.13	2456.48	1626.72
517.277	1022.5	142985	2430.15	1350.4	1781.67	543.156	955.008	1662.89	627.412	1189.53	7296.61	1872.09
259.154	870.833	26.716	1906.71	653.996	1047.04	540.611	916.545	1091.44	517.172	808.135	422.542	2040.64
271.155	794.675	36.178	1934.55	685.548	1050.79	528.124	1067.53	1429.29	535.443	1001.1	556.786	2050.24
167.1	53.0386	17.6659	87.0797	57.0247	76.0392	46.7363	47.0842	73.2831	56.5826	80.8982	54.3442	70.4966
518.278	224.497	27129.4	493.142	290.82	414.642	109.95	194.383	317.496	118.572	300.535	1451.2	432.59
514.284	25058.9	3.03342e+06	64389.2	37387.4	45585.9	9861.06	8775.62	28930.3	12433.7	31964.8	305567	38315
515.286	7813.8	1.68841e+06	19987.8	11447.1	14347.1	3188.39	3184.29	9538.12	3974.06	10042	91895.4	12157.1
516.284	2758.07	556870	7208.89	4059.17	5105.87	1167.73	1095.83	3355.27	1449.26	3606.78	32141.8	4315.81
582.271	467.7	282.579	744.656	746.809	806.992	311.228	166.353	572.053	261.585	663.797	2478.96	498.548
512.663	195.331	49103.5	577.022	293.582	371.838	75.7784	64.834	224.16	85.8338	287.445	2711.89	305.32
212.116	85.03	31.5799	96.7662	84.9802	90.6395	72.0736	60.1769	104.264	72.5971	129.811	157.419	107.203
281.176	134.076	50.9535	105.47	200.651	124.587	106.087	95.6627	152.672	78.8254	151.895	163.9	197.144
211.112	587.008	32.9531	597.931	511.636	543.172	495.393	363.111	751.184	552.93	877.025	605.049	773.699
513.661	69.2655	17277.3	184.383	96.6359	138.476	21.3439	17.4668	76.5738	25.5938	90.6296	894.146	103.201
233.083	175.401	51.7433	324.649	145.186	240.779	85.6597	120.857	242.546	120.032	167.141	144.675	309.93
263.039	125.662	5.595	170.249	58.523	28.5989	167.595	93.9298	173.441	69.6408	149.4	333.554	229.916
262.05	247.812	26.456	320.156	105.183	83.7641	44.1926	153.161	314.665	132.86	293.383	571.244	416.327
200.127	218.382	36.0923	267.133	568.115	497.441	346.674	130.377	498.634	292.431	418.695	195.784	219.393
290.142	187.093	130.894	250.792	141.466	150.375	254.628	157.479	396.874	114.27	276.497	242.773	263.452
261.044	1933.94	26.7811	2569.51	747.175	436.975	310.632	1197.77	2430.64	1021.65	2269.67	4148.62	3329.91
785.466	146.558	6.93944	134.287	78.1001	152.24	14.0925	79.7268	92.1585	33.3647	38.6519	77.763	122.542
797.49	211.72	6.98642	153.388	145.189	304.409	37.7255	91.711	141.394	92.8034	58.0474	289.217	117.443
614.33	13570.3	95.2451	6527.22	8835.84	17809.4	1534.64	5276.1	8207.24	5340.61	2181.04	8532.12	5448.45
615.333	4462.86	141.443	2437.97	2981.52	5857.02	561.954	1846.15	2908.63	1754.04	799.162	2684.07	2202.11
604.302	1095.18	4.88298	608.427	722.937	1553.14	218.951	512.556	930.104	449.687	280.964	580.193	613.414
229.166	136.9	33.685	153.745	156.646	149.616	133.905	79.6632	132.454	127.571	184.67	213.087	139.01
825.893	52.0917	4.26252	45.4067	168.848	131.394	109.138	21.471	43.9792	55.3858	33.4193	30.942	34.3104
612.387	65.6164	1.22312	88.2435	86.6277	157.791	18.1368	35.9928	64.0964	19.9025	31.1499	73.2292	55.3016
228.16	871.418	105.611	864.068	940.212	943.833	772.34	523.702	905.973	817.369	1157.17	1060.28	920.112
616.334	1057.63	70.7794	611.029	712.531	1355.91	144.874	462.046	724.902	447.745	246.106	711.474	583.196
254.177	101.935	18.1332	74.4441	94.8462	91.527	61.9966	47.6017	86.0943	64.9763	103.397	127.63	87.3746
193.089	80.1678	28.1909	108.015	226.532	256.635	51.0101	54.9131	236.572	75.1816	204.267	441.3	246.208
159.103	232.937	28.0774	413.683	195.981	167.579	201.856	142.274	392.804	249.782	401.903	274.445	413.932
512.268	3106.03	9943.4	4280.79	5163.5	12542	1423.59	1051.24	2349.42	1439.07	1123.11	12579.7	1251.39
321.137	785.595	70.0432	1842.87	808.133	864.278	352.021	707.753	1225.12	506.28	737.947	992.29	2064.07
185.118	331.867	89.157	446.243	273.061	299.459	240.254	136.099	318.003	262.715	393.62	297.112	381.802
326.117	161.161	90.6211	267.32	191.982	170.877	185.165	109.605	472.379	245.212	265.331	215.355	267.234
574.278	578.183	60.2295	635.276	664.107	879.939	242.539	474.765	571.921	458.537	399.993	450.425	469.648
513.269	1210.22	4497.99	1913.37	2181.48	4484.49	628.37	631.488	1236.19	625.725	675.068	4120.09	710.135
215.129	2680.33	268.368	4732.55	2015.29	2754.23	1403.89	2435.43	3733.2	1485.71	2850.87	1991.03	4786.71
216.132	343.213	66.1577	632.681	258.146	356.014	176.641	305.24	480.952	193.811	357.057	262.994	609.42
361.199	856.945	265.034	1333.46	1795.84	901.856	769.195	1343.54	2610.2	5844.18	816.254	1427.64	1406.97
274.173	196.803	29.9512	413.557	141.928	232.355	127.214	188.193	281.617	112.378	194.451	100.322	397.037
710.462	69.0894	5.36869	96.482	65.046	49.072	24.8569	11.3663	59.8781	39.0874	67.5597	36.0159	173.03
362.185	228.053	32.5305	360.798	440.505	194.57	202.437	327.333	814.855	1452.97	248.172	400.078	374.798
273.169	1223.92	161.423	2641.9	957.65	1472.22	664.201	1161.06	1758.66	753.782	1353.22	632.199	2454.65
309.136	1784.02	148.959	3992.97	1799.64	2148.45	771.1	1722.86	2888.8	1128.23	1970.53	1318.31	4045.79
423.037	275.918	13.41	209.891	169.626	106.312	50.2766	130.257	249.14	113.371	207.169	287.592	237.76
449.272	316.914	11.694	241.758	248.562	432.216	92.4179	105.288	191.376	244.358	124.066	251.378	219.497
347.017	84.0971	23.3186	162.39	89.7192	90.7849	100.797	171.481	354.326	96.6497	246.355	212.73	1232.11
278.916	106.145	18.3101	94.4137	89.6263	54.4288	41.7571	146.44	187.887	107.42	110.265	111.634	133.479
353.16	704.177	71.0685	1501.44	748.186	874.15	363.742	656.045	1151.29	407.79	650.029	477.438	1402.97
473.237	918.904	184.367	2425.98	710.133	1365.81	536.806	1131.26	1775.06	401.483	803.221	604.305	1901.4
450.274	92.3548	9.49677	75.0317	149.366	117.91	90.3467	44.3811	66.808	66.6079	45.3818	89.0174	67.1107
225.112	632.086	46.8315	526.159	584.966	587.061	149.933	276.729	630.471	980.13	903.109	882.168	633.543
291.161	144.055	65.5802	203.718	152.413	172.835	114.447	112.431	210.954	117.411	173.036	145.215	227.103
481.209	682.819	1092.14	1556.07	874.78	1065.53	521.74	739.733	1274.52	385.108	609.178	590.887	1472.11
365.163	1443.74	381.693	2964.26	1853.09	2396.26	1352.34	1391.85	3917.75	1361.46	1477.74	1888.51	3193.74
117.071	34.9475	22.3788	78.8049	24.7881	25.4277	17.5158	53.5649	61.2349	1226.57	209.105	208.749	301.6
343.176	950.468	148.383	2034.25	692.698	1158.87	480.792	1075.97	1376.21	426.57	931.644	695.192	1891.95
612.32	8167.88	402.216	2349.76	2844.6	4928.11	655.409	1311.85	2945.57	4754.79	2320.87	2630.28	1409.26
417.213	1370.71	166.106	1806.91	2746.46	1586.49	1018.03	884.363	2198.79	1371.38	1447.98	4420.63	1742.07
613.319	3086.81	194.428	1412.51	1371.17	2047	395.112	735.291	1435.05	1820.48	762.752	1003.65	988.667
351.147	1230.82	110.731	3401.77	958.38	1457.89	569.781	1536.41	2256.05	589.154	1020.51	601.228	3128.79
367.177	1446.14	389.105	3166.94	1188.86	1212.47	878.961	1580.47	2474.27	962.434	955.684	1433.23	3138.33
241.142	871.297	146.854	1644.01	718.738	1024.53	616.555	825.218	1112.93	831.611	827.595	465.158	1539.07
602.296	910.897	57.7558	506.629	450.654	735.723	189.376	440.955	573.172	495.555	294.174	359.741	455.846
227.129	848.542	172.91	1049.97	762.92	791.424	589.329	431.797	928.806	740.61	695.273	675.14	782.742
294.065	1606.9	91.4497	3252.86	1409.96	1443.31	908.257	1533.81	2631.95	894.9	2117.52	896.025	3896.74
293.116	770.955	185.759	979.598	784.263	950.424	822.653	1190.8	1310.41	1551.27	1160.41	996.016	1240.65
270.173	110.394	24.492	116.602	110.574	136.646	84.9191	69.5447	126.049	118.501	115.973	120.671	119.496
379.143	1002.17	53.0002	1656.43	790.97	1527.28	709.446	612.498	1429.47	535.98	842.938	463.02	1681.49
157.087	550.489	153.203	492.554	699.888	654.321	333.97	361.704	619.281	644.691	287.539	627.427	459.602
158.09	55.8632	12.5057	50.0619	68.5584	68.951	36.7282	35.9102	58.6697	63.3409	36.7171	67.0976	49.2438
183.103	379.682	57.0173	531.662	377.632	309.537	485.315	351.903	547.83	320.945	574.536	397.623	462.929
639.332	547.729	97.585	853.215	1015.25	991.952	245.514	601.282	778.244	849.941	208.912	338.572	653.567
503.261	455.038	194.618	961.629	229.305	644.736	408.772	770.028	834.893	289.729	495.215	305.61	834.674
638.332	1118.28	62.8415	1078.73	1408.95	1854.23	358.938	913.776	1421.92	1014.18	965.575	1475.41	575.329
181.093	106.976	48.0823	160.858	102.506	118.507	75.5606	161.881	105.329	95.7027	121.153	94.3887	131.252
394.266	45.1285	6.71329	38.3278	41.4669	73.2581	84.6972	56.6627	127.259	136.5	36.372	65.7491	38.9869
393.263	121.875	197.484	130.154	139.975	258.213	344.682	186.319	454.606	518.242	130.533	231.087	109.975
197.124	219.901	31.5604	166.024	228.458	242.1	106.07	143.772	223.516	226.198	142.507	205.348	157.295
223.121	296.513	31.7606	229.964	302.279	334.555	109.744	180.086	322.001	276.434	208.639	353.351	205.02
415.199	1637.95	261.731	2587.01	874.957	1193.88	630.939	1592.87	2643.5	1651.05	1549.72	1463.45	2102.88
416.201	367.117	83.418	564.837	226.863	246.898	152.211	370.001	591.681	408.398	393.438	387.067	437.376
285.17	1070.16	112.439	2183.42	868.641	1294.87	528.305	1059.7	1541.84	650.983	1013.52	561.403	2079.81
286.174	209.452	35.2146	353.853	171.841	239.313	111.148	196.996	282.028	135.863	199.413	156.718	377.112
335.153	653.132	119.729	1331.85	717.683	761.589	415.493	637.206	1078.75	517.719	651.652	526.696	1200.78
277.111	979.975	33.6152	604.403	633.558	679.21	368.291	2174.9	2426.11	1757.01	2356.76	2294.57	2697.58
282.174	90.5938	41.3968	118.525	103.053	124.863	130.081	75.8408	168.856	203.496	130.079	98.2149	139.605
567.294	555.783	2873.76	1564.52	902.153	688.207	306.782	370.915	725.313	546.003	770.409	4117.37	831.453
525.275	623.939	594.601	822.685	1610.76	1166.94	279.946	288.354	993.754	337.595	1071.05	510.213	834.739
524.276	1067.64	511.08	1806.08	3479.83	2153.54	325.999	473.541	2084.87	351.921	2465.61	1097.56	1297.55
663.334	541.687	99.227	711.578	688.597	1054.16	434.357	553.825	829.365	599.133	363.871	400.006	660.334
274.041	57.3808	22.7842	103.343	41.4086	66.0626	34.5672	44.2818	95.3236	29.1826	57.6641	47.2165	94.5534
496.271	557.988	17072.6	464.51	1155.73	1150.08	209.417	131.759	402.389	411.157	187.149	1719.05	194.092
429.18	3790.16	449.252	5517.42	2570.67	1451.78	1069.26	3172.09	5656.33	3953.59	9154.99	7158.86	6597.4
430.184	907.329	156.674	1268.57	659.345	322.043	273.717	773.604	1369.83	928.154	2050.12	1642.13	1501.54
263.053	571.935	25.9787	597.715	300.863	198.995	152.741	361.937	601.533	468.448	864.939	1505.24	1228.51
388.031	52.7048	10.9531	137.404	48.5931	58.6414	43.4977	48.2778	103.629	28.3352	61.5668	58.1192	99.4678
278.13	287.303	23.1585	186.396	246.838	203.905	220.733	358.485	458.24	384.335	490.906	448.264	467.306
662.331	890.013	135.848	651.87	985.204	1492.56	391.535	819.889	1054.01	1078.3	539.902	538.355	665.093
337.139	1049.57	169.71	1287.25	607.967	466.503	551.578	943.674	1390.88	832.262	1386.18	1064.44	1606.31
544.299	242.881	3543.49	855.569	353.837	343.787	176.152	447.501	515.532	178.825	317.162	1134.3	436.638
487.368	51.5904	0	18.5214	54.6774	48.0198	45.6511	24.2053	31.4977	57.2443	73.9313	39.3943	40.1705
287.185	709.738	117.69	1249.67	569.424	874.244	441.626	600.936	1006.67	509.824	757.653	465.775	1229.7
281.175	268.063	58.192	344.446	247.992	340.038	202.41	168.164	470.277	270.301	282.515	122.435	425.83
241.417	87.0201	11.9875	58.9042	90.0211	82.9408	77.0488	40.7174	81.9581	87.8031	97.1343	73.7162	79.7964
242.176	8199.79	1245.51	5800.7	7988.69	7160.31	7074.13	3786.27	7098.52	9710.67	9889.76	7089.23	7453.08
330.231	1157.75	545.743	414.014	676.697	692.435	289.782	355.486	590.576	894.546	564.087	836.834	554.077
329.23	5494.99	2406.57	1868.92	3310.79	3372.99	1382.45	1750.16	2919.96	4520.13	2529.86	3676.05	2670.09
310.159	338.124	49.5556	255.582	386.461	400.281	546.929	188.062	384.14	307.666	444.416	351.815	219.814
738.502	228.48	14.2647	98.2662	108.214	92.0463	165.124	54.2572	129.244	315.632	154.574	74.4199	219.898
287.613	38.0163	284.728	292.495	120.495	85.0084	50.1476	19.6338	79.0521	45.2451	171.703	1067.69	24.0026
627.38	134.984	10.162	178.369	265.821	198.43	113.847	103.197	182.112	163.18	194.565	427.2	208.501
328.133	416.735	95.5453	442.226	424.413	455.423	444.462	400.451	783.925	746.251	558.515	375.569	540.926
542.379	32.0587	18.9407	39.835	36.0335	30.6529	32.8758	21.9397	36.5323	47.6093	34.2015	41.9266	36.3339
560.38	47.6483	7.48739	24.9741	33.384	49.7718	28.3633	35.0654	40.3506	54.8216	45.4592	32.7028	41.0909
659.474	217.992	49.3932	31.8415	63.067	65.4129	23.8586	47.4218	63.2684	146.032	70.7227	114.888	61.7013
297.15	1159.65	370.271	1844.66	4024.33	1720.1	1616.59	607.479	2100.92	1010.26	2024.23	6004.96	1209.84
229.144	1777.26	559.22	2912.35	1374.54	1986.61	1287.08	1806.85	3232.75	1654.99	2782.73	1499.31	3466.64
598.378	56.7398	69.2428	58.5654	75.9533	66.479	46.5695	45.524	100.699	70.5285	57.1838	61.675	61.8019
230.147	249.674	58.6176	433.201	197.791	266.807	179.985	239.971	449.43	234.016	392.161	191.402	479.596
344.979	170.443	10.8662	186.935	203.212	202.933	182.41	129.653	202.676	176.73	227.356	183.246	219.834
459.259	403.026	112.809	825.797	273.807	426.637	241.055	457.176	440.649	242.469	303.121	234.958	739.146
586.374	79.6498	0	118.953	48.009	83.5688	54.6016	58.9132	75.9908	56.8337	85.4889	33.7164	100.984
644.386	134.623	15.8712	186.138	96.145	144.299	102.026	73.1239	162.4	107.047	146.206	114.601	162.785
556.376	42.928	14.8309	30.3021	43.6104	50.3343	34.9489	26.1411	56.2498	54.6618	49.2587	26.1389	44.6827
573.393	177.297	72.1834	99.2123	122.262	134.362	76.4499	80.0631	110.778	173.89	110.568	119.02	124.364
487.236	522.794	2261.9	2036.7	729.917	838.06	325.284	554.743	1215.76	332.36	480.631	2255.77	807.083
559.379	84.1862	15.7826	95.9672	50.7514	74.0556	50.1969	45.2614	111.994	95.7422	85.0247	56.2773	85.1434
628.388	136.457	15.0546	119.476	99.5832	95.593	85.5824	83.2431	112.428	102.566	135.052	145.656	141.465
363.184	993.79	1001.36	1556.08	1177.65	1136.26	679.474	1239.37	2220.8	2473.05	1201.59	759.904	1739.49
296.617	38.3314	647.924	274.179	1152.38	993.1	70.6389	29.6325	118.489	41.5798	202.729	1806.2	16.2664
640.344	548.732	119.241	466.152	654.49	899.456	238.458	440.57	637.956	567.155	326.144	365.584	375.681
438.122	203.062	2.79783	195.809	179.975	203.572	144.898	96.9882	208.499	180.89	191.901	106.956	186.558
226.142	77.9913	30.3422	175.355	168.384	251.197	215.811	83.2781	136.344	123.482	82.4807	66.7347	70.2831
170.09	71.8777	14.5375	49.4986	81.0335	102.156	34.9605	35.846	57.9579	100.884	23.3088	33.9759	41.0083
500.288	764.712	123566	1528.95	816.1	602.84	251.165	316.794	573.996	334.493	514.508	8805.04	471.433
125.091	58.3582	22.3855	40.0813	63.4892	78.9234	23.4702	28.3698	42.2867	82.6118	22.6037	25.8237	29.3955
169.087	690.125	145.809	400.546	749.554	936.042	271.364	306.592	484.421	971.358	209.546	288.734	366.998
432.229	323.36	66.6799	364.394	853.827	418.882	369.225	189.52	594.46	354.716	522.743	737.447	438.597
431.227	1309.28	226.99	1409.32	3335.25	1632.26	1398.28	785.135	2406.94	1337.06	2078.59	2693.34	1860.99
496.725	40.7908	565.956	121.886	58.9891	33.9579	15.9909	18.0631	37.436	20.6032	38.6958	759.724	33.731
444.165	742.43	92	761.032	821.842	274.831	229.333	597.907	1750.38	988.275	990.563	621.558	871.968
499.29	2217.69	365293	4519.79	2265.29	1913.65	717.235	954.233	1833.5	908.603	1498.08	25755.7	1344.53
498.288	6254.3	1.25422e+06	13288.4	6741.14	4593.68	1702.49	2349.28	4539.4	2293.77	4008.23	84487.8	3097.43
443.165	3090.52	857.814	2917.89	3174.71	1112.74	831.021	2575.92	7270.42	4278.78	3979.52	2223.32	3593.98
938.512	234.162	773.367	237.551	147.598	149.172	87.7337	101.185	229.846	205.644	187.262	249.471	259.354
365.032	124.168	6.17472	142.175	78.0787	104.915	60.9928	84.7632	345.214	65.6755	287.432	280.233	201.772
269.13	542.207	99.4125	725.462	574.294	510.396	363.586	432.389	506.211	584.162	714.721	412.845	709.912
484.271	184.746	1707.96	398.93	190.711	143.866	146.115	78.432	156.951	90.755	174.494	2029.72	145.631
550.276	372.05	648.098	309.094	281.551	544.326	263.565	247.149	406.787	289.495	229.225	256.296	268.459
288.619	107.644	1674.06	1054.1	432.777	239.425	174.855	49.3126	225.619	107.907	625.702	4565.07	71.1297
289.62	10.027	291.823	179.979	69.2575	43.9401	28.8335	7.92907	50.7476	9.84128	107.86	682.489	5.02525
421.119	310.243	27.6151	338.48	425.8	218.451	289.192	134.747	377.727	311.007	507.526	562.209	331.645
582.274	525.696	995.288	563.867	553.384	409.725	276.427	135.839	310.076	251.834	437.25	1285.62	391.033
322.621	5.51935	112.61	179.216	58.1308	46.6597	33.2702	10.1752	32.1545	14.3824	97.6206	588.964	16.1993
514.659	97.184	1032.93	198.139	96.5953	52.9393	13.8004	14.8357	76.0537	20.9099	62.5877	381.528	54.4045
518.276	435.107	6862.84	724.045	405.812	399.027	180.804	298.412	391.832	150.367	291.915	1648	456.401
214.149	87.4987	16.8519	177.163	126.421	112.786	91.3496	97.584	187.218	116.078	126.819	58.718	170.966
517.281	1934.37	55612.8	3289.52	1581.89	1455.4	529.974	667.38	1582.42	431.875	1084.6	9010.25	1846.83
514.283	62348.5	1.40628e+06	104953	54673.7	31295.3	8473.9	8575.23	30019.5	8165.5	32332	386070	33003.5
515.286	19479.2	403553	32931.5	17141.4	10338.9	2842.3	3135.26	9921.37	2759.95	10196.6	114374	10822
516.284	6684.68	144281	11643.8	6001.16	3489.26	990.571	1060.84	3393.83	933.305	3599.92	39899.8	3721.64
512.662	549.783	12664.6	982.429	477.822	247.789	70.6291	71.3445	301.094	67.5452	287.551	3389.57	281.123
513.662	174.061	3858.44	311.523	174.257	88.5734	29.2589	30.7953	73.7634	23.2292	84.0491	1188.6	115.472
213.148	449.572	290.869	944.045	441.152	549.19	299.161	540.091	666.599	325.837	509.509	212.258	1043.63
599.378	127.494	81.5103	205.829	84.806	114.502	77.9835	93.585	175.953	132.935	128.806	112.151	186.239
209.115	345.743	57.9948	486.899	359.942	237.545	177.93	261.478	422.485	649.892	308.267	612.323	410.815
631.384	180.052	20.6883	296.767	138.678	203.379	148.003	254.439	311.843	340.682	206.118	186.601	297.752
922.545	471.831	1651.27	363.438	178.773	229.174	179.211	114.802	277.492	337.901	197.142	657.678	296.447
221.082	801.463	677.543	1271.74	1333.02	1194.87	582.368	465.586	1467.84	523.472	577.297	961.758	1488.25
222.086	128.102	118.789	199.181	191.116	182.908	93.7561	76.7698	216.442	91.1341	115.416	158.128	233.187
629.374	241.842	53.4588	342.528	173.641	211.754	175.579	236.961	304.875	252.59	169.208	209.141	379.849
922.568	469.717	3360.18	378.078	171.685	179.881	139.984	83.0149	241.967	332.301	136.208	939.166	286.468
297.036	219.747	18.6723	138.165	112.637	74.4734	135.519	49.0293	118.427	117.759	208.236	73.3942	96.3533
217.161	16.2824	12.3616	24.4508	11.4119	14.7193	25.4351	22.8144	37.5807	23.894	30.4853	33.1117	24.4908
299.184	1666.16	706.414	4163.88	1222.42	2039.44	987.645	1811.76	2569.67	1098.53	1707.38	753.84	3370.22
331.19	637.693	258.156	1190	268.28	296.784	200.724	631.612	1180.18	1477.25	1034.77	975.205	979.179
308.161	305.163	148.133	694.264	279.497	313.356	197.189	312.068	468.017	203.072	356.372	415.51	544.416
464.295	183.023	8571.12	149.844	140.237	100.094	82.6051	35.9081	153.98	42.0966	63.3495	190.846	61.5517
307.158	1697.31	262.829	3794.47	1548.61	1728.28	1103.58	1745.35	2790.16	1082.89	1954.55	1865.58	3182.86
255.159	455.183	165.621	603.696	385.217	393.293	353.521	340.282	818.672	480.697	674.738	333.856	748.153
393.193	1811.68	1932.59	4349.66	1785.35	1894.75	1163.38	2377.12	3622.63	1196.23	2093.47	2055.3	3992.09
708.474	105.029	85.3221	78.5417	48.7982	97.7741	86.1908	51.1538	102.381	116.545	83.4135	27.114	125.944
707.471	80.9928	24.5433	69.7546	34.8975	60.6985	72.1487	46.9063	118.542	116.8	43.984	51.2254	141.255
332.18	168.999	35.6971	365	89.834	78.7828	60.9946	170.743	340.404	452.981	282.543	283.01	278.633
335.069	968.083	196.585	1154.53	718.965	834.64	932.783	988.015	2300.94	535.435	1989.2	3323.34	2087.03
408.282	196.661	454.945	60.3613	46.5541	139.714	253.119	46.0054	231.468	255.154	57.49	185.476	112.043
243.166	2960.74	551.645	3017.9	2607.26	2877.33	2100.13	1754.82	3438.68	860.85	3618.48	803.258	4053.74
407.279	730.187	376.757	208.729	127.064	516.252	968.604	150.232	829.328	958.613	185.979	644.563	380.856
244.168	401.769	84.3413	460.847	373.911	415.302	289.693	266.222	336.473	185.812	491.253	138.339	431.231
578.304	463.664	317.226	507.314	219.766	569.262	788.817	185.145	1005.07	136.024	536.592	318.663	645.275
215.165	303.859	142.183	420.436	318.543	358.764	263.191	246.1	417.47	276.418	382.531	299.223	391.091
216.169	33.9758	9.60738	65.2747	44.0256	37.3021	38.1497	36.4187	44.0818	39.1551	50.4592	39.6017	38.5898
476.276	296.154	228.999	325.633	674.61	529.568	371.416	375.373	717.566	286.338	421.797	815.642	302.142
423.273	196.06	126.944	476.467	387.113	137.158	200.557	192.705	760.645	872.882	237.538	303.813	295.199
377.268	104.293	45.7788	243.691	177.16	56.9943	107.851	86.7181	355.922	334.298	108.979	112.464	121.495
378.275	35.6892	13.2429	63.5859	50.4013	22.8604	33.226	30.2343	98.4785	92.0321	39.4479	46.021	43.9822
373.094	285.216	33.7568	676.869	234.782	342.432	121.94	271.229	444.185	156.156	231.094	209.288	498.016
453.284	2624.71	2916.38	1492.41	797.554	3160.03	3958.84	880.665	4934.72	5147.58	1102.75	3926.24	2485.61
477.272	165.45	165.909	184.083	310.601	181.439	159.315	164.987	285.692	152.909	232.262	307.675	155.911
424.277	52.5965	53.4981	136.633	107.083	53.2951	64.4229	60.4936	216.775	206.281	76.5533	80.2841	98.2154
186.121	61.0063	18.2032	89.0641	51.3986	46.8288	86.4146	71.8543	107.713	77.0225	122.77	67.1145	90.0042
454.287	795.895	887.447	456.314	199.662	897.822	1115.88	245.259	1396.72	1478.66	332.794	1115.63	690.648
185.118	527.682	110.723	794.204	450.979	473.117	698.601	582.397	920.38	619.79	971.519	679.18	751.263
256.175	114.08	38.7678	133.837	109.925	91.9095	77.5037	82.9822	172.4	121.885	166.068	111.98	150.043
508.28	610.887	1822.32	388.416	458.631	430.897	147.902	305.66	515.243	206.099	209.487	256.323	351.425
455.267	406.559	232.766	858.348	242.564	524.351	374.085	449.664	591.074	456.082	402.525	297.389	725.521
296.179	102.294	76.6414	143.291	148.627	205.361	260.238	192.687	275.663	346.906	239.376	180.4	175.499
319.131	549.388	223.179	447.494	539.996	485.061	685.718	468.778	746.853	538.722	538.414	612.04	650.681
294.983	96.6002	22.2294	76.0919	96.7236	92.2502	96.8884	47.6417	94.8841	97.8886	114.335	95.7495	74.7734
254.148	169.154	88.8413	353.132	134.923	139.741	115.38	201.48	280.288	193.993	383.212	211.741	341.528
509.273	366.008	1812.83	411.941	347.49	431.856	171.61	307.852	393.978	229.597	280.207	258.416	485.943
478.291	129.684	1352.84	257.986	373.049	796.047	617.429	125.97	502.052	571.144	410.823	429.491	267.776
408.978	144.046	5.48547	165.183	185.398	164.532	160.058	107.464	181.854	158.258	217.892	181.055	154.161
253.144	1026.04	494.772	2130.34	807.687	842.94	692.126	1278.62	1726.04	1147.85	2368.25	1670.9	2113.38
337.168	1004.02	989.477	2296.5	1057.26	1004.15	620.426	1179.6	1620.9	680.135	1139.63	1101.8	2162.26
338.17	202.967	207.904	428.071	355.438	200.607	121.792	242.566	316.308	157.114	236.945	235.532	415.189
301.198	918.488	266.449	1551.14	781.821	909.697	683.971	916.372	1112.61	623.718	1017.48	633.228	1499.1
245.158	312.325	103.811	271.407	297.088	438.93	274.034	155.164	316.141	492.313	353.939	257.904	285.252
539.312	604.209	1048.31	500.175	386.931	495.568	267.811	290.299	524.383	380.281	426.044	312.405	359.624
507.274	423.051	494.564	1234.2	309.603	469.187	184.294	719.356	565.433	263.196	466.304	300.036	739.446
210.159	23.4656	4.16029	50.2673	18.2991	21.1551	14.0016	27.2031	26.0008	17.009	25.648	12.805	37.9814
538.314	1286.69	652.259	678.927	861.067	958.232	499.59	521.217	987.969	856.982	806.873	606.528	154.4
229.18	185.538	68.027	232.9	195.74	192.627	139.854	128.61	218.951	176.352	227.406	146.17	232.899
290.187	132.055	108.342	88.5325	152.411	151.708	163.791	104.807	208.383	199.344	214.006	133.982	114.228
586.314	137.957	391.622	457.202	319.967	550.114	155.409	376.655	353.731	524.101	351.455	405.918	346.119
295.155	346.084	111.694	296.092	340.469	353.611	185.035	140.496	677.921	342.059	341.807	391.045	464.205
563.277	346.483	11581.7	1128.62	512.228	632.944	248.166	350.698	668.925	208.907	515.792	1816.21	612.819
227.165	284.887	133.776	518.71	219.075	318.308	164.916	295.64	367.379	175.921	288.615	257.829	528.11
501.273	443.966	14979.5	1204.14	714.64	2170.71	438.625	1352.07	1103.93	533.216	610.416	501.686	864.981
386.259	84.3971	6.96092	183.689	62.4411	82.8762	41.2908	98.4006	96.7547	59.5739	62.9665	63.8313	168.626
280.163	62.8027	19.3794	94.9139	56.2931	65.4284	64.295	134.886	89.3358	80.0412	92.2096	67.7265	68.9469
404.121	395.965	105.676	352.601	305.662	247.551	526.306	194.387	372.573	393.131	173.999	560.372	270.264
403.116	1262.49	231.985	1052.31	965.094	900.779	1878.88	565.419	1189.08	1339.06	622.42	2011.81	791.903
315.202	1026.02	256.157	1780.13	1186.6	1173.83	658.621	1008.68	1559.25	902.503	1252.14	1202.08	1725.23
286.205	152.591	46.132	203.425	128.656	179.519	110.644	107.379	195.976	116.119	197.612	108.813	194.505
257.176	714.338	206.402	1258.96	470.709	696.824	359.05	652.288	944.592	487.226	903.95	455.633	1342.06
270.18	316.791	72.1862	275.888	251.783	244.813	186.464	247.171	635.443	510.425	371.169	394.138	292.311
496.273	197.988	66775.7	248.562	317.599	236.747	100.895	188.937	396.598	265.184	134.448	3021.42	129.849
258.177	117.418	57.6172	212.662	77.5406	116.34	82.6493	107.564	144.988	119.784	143.609	67.4199	207.734
452.276	201.861	551.29	178.984	149.936	455.932	410.657	283.809	407.687	622.647	157.479	254.749	114.511
285.207	764.989	204.769	1042.47	665.118	892.514	573.52	594.184	1018.19	639.655	839.473	569.483	1028.02
457.275	403.687	195.984	845.469	281.202	435.118	203.812	410.068	524.316	205.443	364.23	191.3	791.128
394.976	191.69	10.1349	186.373	216.301	207.391	195.228	138.162	212.796	193.362	227.643	226.019	185.021
279.16	252.942	152.884	435.594	202.403	274.676	416.492	715.67	274.692	311.791	353.384	225.769	298.046
279.132	581.351	304.447	893.475	744.097	428.469	362.76	1307.89	1135.51	1334.86	1201.53	2215.34	823.734
361.257	63.9436	12.9715	70.0539	41.4353	60.1443	62.3823	38.2248	62.594	51.7439	52.3828	32.6869	75.5786
451.269	533.848	592.11	266.387	244.812	1215.78	1142.74	163.689	1168.77	1212.89	185.8	529.909	185.658
413.254	490.029	60.7604	975.74	303.472	561.795	186.674	484.777	508.323	268.069	404.141	182.473	907.357
251.165	132.202	83.7311	186.856	72.442	103.83	48.3185	187.991	128.575	94.3079	109.394	74.8639	134.459
500.277	326.882	75389.2	523.245	905.19	691.2	281.238	412.13	925.271	165.367	578.953	497.421	513.917
323.151	1756.25	527.98	3136.95	2375.83	1891.72	1046.98	5436.4	3486.62	2411.29	2723.43	3775.01	4077.99
324.154	326.428	112.736	608.31	450.564	351.226	204.703	1044.64	653.791	464.333	546.007	702.245	784.507
345.262	45.4299	15.5109	128.995	20.7649	37.2494	22.9657	78.9995	96.2451	32.6183	86.5462	18.4707	120.054
309.171	817.225	691.481	965.126	926.675	1311.55	610.346	1247.85	1382.28	761.143	1179.84	986.403	815.375
346.17	1408.3	83.1261	1741.82	668.345	333.277	456.895	115.708	358.584	218.261	117.181	110.081	105.475
235.17	31.6952	5.35175	38.0217	19.1312	24.0649	19.2509	56.0073	23.8616	34.1803	44.8536	19.2585	30.7755
310.174	143.697	144.003	164.871	132.45	85.3872	148.985	228.547	144.176	133.368	181.052	136.155	138.115
294.178	102.459	18.7239	61.1066	81.0065	89.9245	57.8109	44.7094	94.567	118.269	92.287	90.9987	71.0692
240.161	71.4762	32.8603	67.6042	88.4048	113.356	96.9036	110.368	242.818	240.916	70.9703	128.322	71.0022
293.175	432.912	155.982	362.505	316.24	448.878	274.919	294.629	452.832	507.76	408.294	441.613	328.771
267.16	296.139	153.464	368.912	281.174	212.626	184.013	170.905	297.762	218.7	175.108	179.304	217.67
427.267	304.357	47.2417	575.667	203.743	261.705	175.534	352.962	372.938	182.026	270.106	137.931	548.717
385.256	506.59	79.3986	788.898	89.8646	348.639	100.77	378.558	466.222	195.557	304.986	128.358	686.257
415.257	541.638	123.18	610.695	414.849	533.561	344.513	376.483	631.883	471.535	483.925	383.92	599.959
332.254	47.0468	7.60444	27.378	47.1525	10.1451	20.1028	10.0946	34.6904	40.0836	35.553	53.666	21.5007
399.273	310.325	73.7153	583.503	162.873	310.869	128.206	337.99	367.637	186.1	329.607	168.573	565.515
422.261	51.6412	13.6618	40.1981	36.7477	69.7345	49.0837	30.9741	55.0655	67.4059	84.1455	65.5344	49.2726
421.256	243.576	69.8128	113.497	175.429	352.333	202.721	130.297	240.156	414.845	596.474	265.417	213.52
283.191	461.972	227.314	746.774	265.957	404.108	227.77	413.607	591.453	305.235	414.108	215.253	774.563
420.249	812.376	385.25	711.785	574.514	1295.41	670.967	434.844	944.495	1034.17	1591.12	1128.84	846.079
374.241	349.645	160.763	330.581	253.248	542.174	281.106	194.508	436.29	419.746	653.495	478.333	383.782
939.576	102.934	1721.52	74.7563	60.0578	104.824	61.8493	50.2986	124.907	63.5278	121.459	125.207	57.351
940.585	64.0548	1521.23	53.1073	43.7995	69.3031	113.465	27.3425	86.3666	43.7414	72.0175	81.6344	26.6431
554.304	331.498	6128.61	300.057	274.392	373.192	240.778	245.935	538.495	271.534	279.936	323.883	120.457
443.035	145.81	0	101.291	111.029	89.4123	113.162	53.4584	106.053	121.554	132.736	127.52	123.808
239.165	36.2731	26.9529	250.969	28.1111	22.614	27.0427	91.0195	152.331	111.557	245.359	70.2637	177.06
398.261	68.4468	16.2887	128.937	50.4161	67.4356	45.1354	80.5973	96.6463	46.31	67.1625	40.6325	128.018
397.258	270.346	50.219	471.497	175.324	278.942	178.271	268.272	325.2	169.021	257.337	115.931	470.149
564.33	8879.05	946.202	6062.23	6925.96	7522.51	4300.7	2539.79	11962.4	6361.48	7049.4	7388.61	724.873
322.153	182.412	87.9652	158.631	198.267	187.499	213.501	242.351	254.681	148.082	178.494	175.397	213.655
321.149	1121.18	253.196	985.453	1213.42	1127.63	1191.47	1213.63	1553.94	835.048	1119.05	1354.07	1354.29
565.333	2810.09	591.014	1951.41	2229.51	2434.72	1389.77	953.36	3864.49	2012.7	2249.91	1927.88	230.659
241.18	195.791	69.3668	232.94	130.895	150.941	106.962	166.205	361.091	225.961	263.185	229.321	284.652
504.308	288.195	198.96	224.503	224.518	264.015	184.873	85.2011	428.348	187.395	238.101	227.561	65.3063
224.168	9.54509	2.67942	17.3487	10.7588	13.9435	7.63341	15.8536	12.0161	7.60474	8.05282	5.18233	14.7077
305.142	191.049	132.884	122.511	141.297	129.731	82.6263	495.589	398.416	274.625	375.439	690.161	435.08
469.365	16.1194	0	20.2583	19.4087	30.2858	16.2735	18.6305	16.0113	17.0387	33.9046	18.9424	23.3216
351.183	442.129	1706.03	969.525	645.742	463.045	513.739	752.844	965.46	323.427	646.073	1003.13	702.339
411.272	108.915	20.7948	189.819	83.6069	109.609	109.021	118.074	142.297	77.5415	108.599	58.1372	185.164
194.082	50.2018	9.90608	46.101	36.6425	35.3718	59.4539	40.2556	69.4224	49.1871	46.9709	55.211	62.703
249.152	78.492	12.7861	116.544	126.178	90.551	54.2224	62.5083	127.03	60.3625	72.0083	314.069	128.13
444.974	102.067	63.2557	98.2989	86.6418	95.605	73.0348	70.5156	100.456	98.771	98.8456	128.54	93.2716
371.261	232.84	48.1085	172.841	168.823	194.604	201.823	123.433	227.731	301.858	205.645	84.6648	180.993
256.199	41.5202	17.6343	82.7818	33.7042	28.2952	22.6746	74.1352	84.4305	25.6806	35.3215	9.67803	76.602
368.254	30.6241	4.34336	31.6201	14.7758	12.0948	6.59312	26.2557	27.637	15.2842	18.7414	8.20295	31.711
193.16	9.20591	1.84425	12.0363	14.4687	4.4422	5.64562	20.4811	10.016	5.44332	6.29623	1.86092	6.59341
255.196	229.679	152.236	489.271	185.774	213.642	133.972	433.886	488.713	130.043	193.128	49.1524	435.998
398.937	61.3024	158.664	48.253	60.9149	19.3956	13.825	52.3975	120.22	24.9892	79.2222	130.217	67.1437
370.262	51.5202	7.87589	80.1899	35.3288	45.2934	32.1177	48.5389	68.1441	40.1689	55.1774	24.6212	67.58
369.257	208.097	36.6028	285.687	185.142	191.395	97.6479	179.764	268.223	148.426	203.853	89.9769	297.598
701.472	38.4558	0.982636	25.5784	33.73	38.9347	29.8265	14.7619	46.7917	34.8052	30.6522	63.9665	22.0912
381.263	41.0099	9.33775	81.5218	24.8262	44.1298	33.7563	42.2868	59.1634	26.4906	32.0547	14.1058	71.622
339.253	38.3914	9.4079	51.1551	11.6712	27.5564	9.96764	53.7149	53.5152	21.7362	17.4906	7.84158	65.8364
476.277	80.7137	120.657	206.738	407.779	244.066	156.234	162.298	390.913	35.1773	207.718	160.224	103.528
342.138	24.9282	319.075	32.3175	83.5118	24.347	71.0193	42.6149	101.407	78.3897	35.9858	101.144	12.6647
412.966	29.7155	1.16589	39.8155	37.1368	30.8405	22.815	40.3485	47.0335	31.9804	39.4507	75.7113	52.8659
269.211	87.1099	35.6953	108.932	40.3467	60.6764	46.6111	70.3566	80.4514	49.8804	69.0559	22.0942	140.619
327.253	73.2814	29.787	154.796	48.2511	59.2128	42.494	95.3356	120.158	48.6913	81.4436	40.561	170.532
328.256	17.5484	8.35599	32.7302	11.4728	13.2827	10.3815	20.6276	24.5255	12.539	18.5003	2.5446	36.5841
350.208	24.7184	311.325	81.0949	34.285	37.3277	22.5803	50.9822	83.0936	17.0291	46.5861	63.4691	71.2269
499.292	72.6617	3385.06	787.648	224.893	144.24	41.2725	188.1	301.503	114.773	222.765	9329.34	61.6103
498.288	181.139	10851.6	2407.18	662.978	398.269	96.737	494.177	781.938	330.178	572.695	30730.2	203.668
349.204	140.45	1224.57	403.56	180.283	155.535	133.507	258.934	394.153	74.437	232.265	306.445	356.018
494.969	39.057	96.7026	37.9188	39.0482	35.2929	36.2085	30.2142	45.6078	32.9116	43.9722	40.0958	35.8942
353.268	20.4729	11.0756	52.0724	14.0666	23.4442	13.3313	30.6102	30.9922	12.2433	23.2793	12.3904	52.3993
315.252	152.534	43.5625	185.742	222.474	177.872	182.397	114.719	232.886	258.497	207.194	180.315	128.628
316.255	29.884	10.7817	31.0228	41.558	30.849	35.9981	13.2985	46.282	54.0526	45.1186	9.34143	27.9984
383.279	9.01476	6.66664	100.01	16.4554	18.9818	14.8584	32.7525	19.6761	6.57238	33.088	19.5614	109.94
462.962	18.5477	40.5606	40.2516	48.1876	39.3533	32.2349	21.9017	40.4253	8.7576	35.443	45.698	30.9259
233.154	11.6033	1.5643	7.15119	7.78982	7.88727	5.14672	6.27943	8.32944	8.91161	3.93385	7.08787	7.10695
498.929	24.316	105.516	132.226	115.524	202.217	146.942	101.132	119.185	74.8061	176.661	120.818	61.2202
499.933	2.5352	0.843562	12.9229	11.2507	19.1583	13.4426	9.8272	11.2312	7.4826	16.1397	11.9648	0.888468
