# Supplementary material for: Transcriptomic and metabolomic profiling of long-lived growth hormone releasing hormone knock-out mice: evidence for altered mitochondrial function and amino acid metabolism
Source: Aging (Albany NY). 2020 Feb 23;12(4):3473–85. doi: 10.18632/aging.102822 (PMC7066919; doi:10.18632/aging.102822)
Supplement: Supplementary Table 5 [file aging-12-102822-s009..xlsx]

## Sheet: Table S5 RNAseq pvalue
Supplementary Table 5. RNAseq linear model pvalues.
Transcript	Genotype Estimate	Sex Estimate	Interaction Estimate	Genotype p-value	Sex P-value	Interaction P-value
Mcts2	-0.306635	-0.124137	0.176099	3.14739e-06	0.000401896	0.000322482
Fam131c	-0.69148	-0.166257	0.219435	2.81769e-05	0.0244804	0.0267974
Ppm1k	-0.184343	-0.252536	0.308598	4.3321e-05	1.44704e-05	2.3959e-05
Igf2	-0.633585	-0.294162	0.263721	5.73355e-05	0.00315842	0.0169588
Hnmt	0.248414	-0.0127244	-0.0667644	6.10276e-05	0.587889	0.0749801
Itih5	0.188597	0.0934608	-0.0472513	0.000101981	0.00398009	0.118811
Chek1	0.709334	0.248453	-0.214082	0.00011075	0.017298	0.0764666
Them7	-0.585333	-0.266047	0.37814	0.000116246	0.00642591	0.00524709
Ccdc3	0.355302	-0.0925562	0.0298195	0.000174561	0.0641372	0.597507
Gnmt	-0.503677	-0.109127	0.472972	0.000180139	0.10779	0.00152326
Ntn3	0.37862	0.0856153	-0.299506	0.000184881	0.0980176	0.0033352
Fam109b	0.309362	0.271937	-0.280618	0.000225318	0.000636394	0.00219314
Fntb	0.204214	0.146392	-0.125215	0.00022764	0.00163614	0.0114827
Rbbp9	0.163613	-0.0153399	-0.0240789	0.000242508	0.46239	0.398721
Svep1	0.68509	-0.127849	0.375667	0.000258537	0.178982	0.0194545
Cd59a	-0.097416	0.0249269	0.0725434	0.000272784	0.0877163	0.00609824
Bhlhb9	0.389998	0.0134867	-0.116191	0.000282276	0.78765	0.130357
Lmo1	0.360175	-0.096743	0.194542	0.000285517	0.0788809	0.0221855
Slc39a1	0.121587	0.0184569	-0.0406797	0.000289694	0.269741	0.0994125
Snrnp35	-0.168247	-0.0611796	0.0990912	0.000293551	0.0313779	0.0164673
Glod5	-1.11462	-0.444644	0.533613	0.000295569	0.022776	0.0346794
Ufsp2	0.101482	0.0638333	-0.0768722	0.00030869	0.00385758	0.00632998
Pid1	0.188642	-0.000682519	0.0454505	0.00032616	0.978106	0.215252
Gpkow	0.0712529	0.0112108	-0.0554073	0.000334811	0.267513	0.00609597
Lnx1	-0.0826773	-0.221773	0.236405	0.000339036	4.31925e-06	1.40771e-05
Cox14	0.0917658	-0.10165	0.0288629	0.000340193	0.000322725	0.125894
Ndufs8	-0.0738768	-0.0793428	0.0542057	0.000345936	0.000379826	0.00796573
Fam117b	-0.273258	-0.106921	0.318686	0.000348135	0.0275784	0.00106699
Srp54c	0.0988985	0.0304824	-0.0553328	0.000370694	0.0622777	0.0238338
Sdc2	0.13276	-0.0425285	-0.0767443	0.00037683	0.0560574	0.0214521
SlcUbl4a	0.934131	0.282751	-0.360596	0.000415232	0.0704129	0.0832464
Ghdc	-0.137742	-0.102511	0.112416	0.000456685	0.00266332	0.00655455
Arpin	0.0985128	-0.0356509	-0.0479031	0.00046521	0.044049	0.0451418
Rtn3	0.0833424	-0.0612621	0.104019	0.00046592	0.00286501	0.00103814
Atp10a	0.551445	0.278909	-0.504064	0.000497919	0.0142087	0.00439922
Col5a2	0.412801	0.0301799	-0.0972848	0.000519031	0.62004	0.264216
Hacd2	-0.184466	-0.0328168	0.262758	0.000525392	0.256187	0.000634631
Oxld1	0.187247	-0.0578933	-0.104006	0.000529499	0.0767718	0.0318699
Sec22b	0.127702	0.0564531	-0.0893314	0.00053277	0.0246691	0.0138426
Elovl5	0.362978	0.108795	-0.253309	0.000578953	0.0880712	0.0149544
Ccser2	0.207295	0.0833713	-0.129686	0.000579693	0.0363708	0.0224623
Samd5	0.513788	0.203344	-0.33891	0.000591741	0.0389217	0.0188087
Sctr	0.778468	-0.0886654	0.112485	0.000606996	0.462367	0.489562
Clpb	0.043684	-0.0890093	0.0540953	0.000612679	3.11523e-05	0.00140473
Chrdl2	-0.873536	-0.313979	0.857333	0.000644137	0.0559231	0.00410872
Ccdc25	0.106228	0.0647494	-0.0312035	0.000663174	0.00867734	0.197224
Ccdc91	-0.0846925	0.0539914	-0.0387478	0.00067844	0.00737536	0.0693903
Slc27a5	-0.85072	-0.728696	0.670552	0.000685306	0.00210031	0.0107266
Rassf8	0.157219	-0.015796	0.0528211	0.000704122	0.526857	0.154041
Prr22	-0.607428	-0.456726	0.616626	0.000709198	0.00383719	0.00388513
Tcaim	-0.217139	-0.0377861	0.163981	0.000715913	0.293587	0.0131582
Prodh	-0.275784	-0.18573	0.472407	0.000744912	0.00639166	0.0003798
Snx12	0.164709	0.0249081	-0.107453	0.000752059	0.359418	0.0236293
Sema4b	0.210756	-0.10055	-0.115085	0.000761088	0.024702	0.0436587
Pfkp	-0.230594	0.0145638	0.0987637	0.000765858	0.692183	0.0895673
Gsg1l	1.24559	0.438566	-1.06188	0.000770059	0.066666	0.00866964
Slc47a1	-0.377131	-0.25226	-0.256639	0.000806652	0.00705787	0.0214303
Dnajc4	0.0793836	-0.111302	0.0832585	0.000809782	0.000254136	0.00381909
Bckdhb	-0.0909987	-0.156907	0.116312	0.000809972	9.41388e-05	0.00159762
Hspa12a	0.741253	0.196512	-0.437621	0.000831576	0.144138	0.0360003
Dgkd	0.101297	-0.0108489	0.106634	0.00083753	0.516334	0.0038788
Osbpl9	-0.125871	-0.0569725	0.133895	0.00085803	0.0324749	0.00379288
Isyna1	-0.372001	0.219307	0.131595	0.000860969	0.0123875	0.151354
4930577N17Rik	0.28934	0.0481754	-0.323605	0.000894174	0.333638	0.00317392
Hipk3	0.165564	0.0906776	-0.0340493	0.000917762	0.0173041	0.376443
Thbs1	0.688931	0.10001	-0.425729	0.00092076	0.396585	0.0332596
Cd274	0.191541	0.185604	0.0168069	0.000927848	0.00162166	0.696704
Hes1	0.350841	-0.0966138	-0.123958	0.000961984	0.142097	0.159842
Dcdc2c	0.326307	0.0398645	-0.145208	0.000966173	0.475107	0.0924957
Cmc1	0.0827971	-0.114444	0.0891854	0.000974843	0.000329244	0.0040488
Uqcc1	0.0922509	-0.0389158	0.00869727	0.000987005	0.0452801	0.679766
Gm14326	-0.186464	-0.0424661	0.179106	0.00101228	0.213679	0.00678745
Ahnak	0.197852	0.018491	0.1199	0.00101404	0.584423	0.0380883
Mgam	-0.399221	-0.427613	0.370157	0.00102851	0.00113979	0.00795713
Ap4s1	-0.0875767	-0.0338812	0.0798948	0.00103316	0.060966	0.00853218
Zfp91	-0.0818349	0.0339404	0.0670993	0.00103781	0.0494553	0.0130702
Armcx1	0.33352	0.0646238	-0.215407	0.00106653	0.284601	0.0319145
Kctd11	0.171403	0.0138911	-0.115274	0.00107244	0.637989	0.0278695
Scrn3	-0.0681227	0.0599472	0.0170909	0.00109275	0.00291379	0.306103
Adcyap1r1	0.238035	-0.0265305	-0.0206361	0.00114427	0.527528	0.712719
Fgf18	0.389248	0.0209064	-0.131551	0.00114501	0.756942	0.189116
F11r	0.110515	-0.0450616	-0.024369	0.00114998	0.0558546	0.367439
Pcyt1a	-0.0610143	-0.0379386	0.0799292	0.00115414	0.0129078	0.0020212
Tor1aip2	0.0827563	-0.0133729	-0.0177817	0.0011725	0.372716	0.380675
Dusp10	0.477345	-0.13084	-0.413971	0.00121768	0.160635	0.0120402
Tmem41a	-0.126113	-0.109408	0.181794	0.00121944	0.00344189	0.0013882
Gdpd5	0.22525	-0.110773	0.0408021	0.00122039	0.0318058	0.45838
Speg	-0.36259	-0.042608	-0.0299374	0.00123503	0.513104	0.729973
Medag	0.309984	0.138864	-0.194377	0.00126248	0.0443897	0.0398619
Obfc1	0.164986	0.00648278	-0.102448	0.00128115	0.824727	0.0415886
Cops8	0.0507324	-0.0320168	-0.034658	0.00128719	0.0133715	0.0303247
Ric3	-0.214378	-0.0421889	0.175139	0.00132089	0.298055	0.0162225
Bmi1	-0.112149	0.00614697	0.0118389	0.0013272	0.759755	0.665187
Man2c1	-0.0835104	-0.0512906	0.154144	0.00133044	0.0152581	0.000484473
Rspo1	1.05419	0.718439	-1.00054	0.00135339	0.0103332	0.00923492
Srsf3	0.139875	0.0147754	-0.183271	0.00135433	0.562568	0.00236065
Plekhf2	0.0873344	0.0705178	-0.0544295	0.00135861	0.00517751	0.0428535
Dusp14	-0.348004	-0.118756	0.293846	0.00137226	0.102419	0.0147766
Ahcyl2	0.352569	-0.0231318	-0.0384232	0.00141257	0.718595	0.659571
Cd109	0.507243	0.380534	-0.621689	0.00142295	0.00733353	0.00331763
Mad2l2	0.147338	-0.0234456	-0.0268507	0.00143413	0.398889	0.470823
Nudt8	0.203289	-0.198539	0.0971191	0.00147891	0.00246979	0.0980814
Hcar2	0.520464	0.12123	0.111466	0.00148976	0.238483	0.405194
Cpeb2	0.163094	-0.0336283	0.019142	0.00149076	0.289501	0.639678
1810043G02Rik	0.121107	-0.0476652	0.0303334	0.00150413	0.073698	0.33746
Pigm	0.113108	-0.0346986	0.0477154	0.00150739	0.139121	0.134291
9330159M07Rik	0.178084	-0.0180063	-0.0394723	0.00150878	0.587546	0.39141
6820408C15Rik	-0.696698	-0.383661	0.233444	0.00150954	0.025255	0.215529
Aldoart2	-0.490963	0.092998	0.139211	0.00152173	0.328218	0.284818
Ddhd1	0.208794	-0.0447953	-0.0148484	0.00155043	0.276289	0.776917
Nadk	-0.0660747	-0.0591043	0.144499	0.00155305	0.00379694	0.00025548
Fdxr	-0.103384	-0.162776	0.166097	0.00158333	0.000294332	0.0011017
Slc22a4	0.392526	0.114228	-0.131298	0.0015956	0.160571	0.221032
Cutal	0.538831	-0.251593	-0.164725	0.00165102	0.0469892	0.260693
St3gal5	-0.566699	-0.244388	0.210491	0.00165115	0.0600027	0.184099
Zfp106	-0.235327	0.11225	-0.0722108	0.00167288	0.044314	0.260352
Cyfip1	0.0837575	0.0355708	0.0161477	0.00168108	0.0635417	0.461954
Idh3g	-0.0700526	-0.0874712	0.0929235	0.0016868	0.000930007	0.00276994
St6galnac2	-0.559281	-0.149477	0.270812	0.00170061	0.196175	0.1026
Dbt	-0.145043	-0.122185	0.135352	0.00171049	0.00536947	0.0121271
Efs	0.50428	-0.0290417	-0.192003	0.0017246	0.761719	0.178636
Fahd1	-0.14212	-0.0496303	0.0981657	0.0017424	0.110415	0.0366573
Hcn2	-0.832952	-0.422315	0.141506	0.00174794	0.0375001	0.517646
Serpine2	0.223083	0.0297357	-0.0519444	0.00175417	0.493418	0.384483
Mrps5	-0.0892283	-0.0509065	0.0707069	0.0017958	0.0255447	0.0233255
1190002N15Rik	0.207697	0.00747011	-0.0532789	0.00185098	0.851673	0.347228
Pafah1b1	0.0632451	-0.00431315	0.0360187	0.00188377	0.725242	0.0703488
Hsd17b12	-0.139055	-0.0405892	0.199953	0.00188656	0.172473	0.00216613
Hsd17b10	-0.150974	-0.172878	0.276248	0.00189979	0.00155705	0.000729686
Sdsl	-0.100249	-0.0738157	0.0927197	0.00190356	0.0102674	0.0137713
Irak1	-0.056877	-0.0474236	0.0620865	0.00190984	0.00621207	0.00713898
Rere	-0.17897	-0.0582186	0.197982	0.00192381	0.137765	0.00680358
Ifrd2	-0.133334	-0.0410933	0.0991253	0.0019537	0.156427	0.0311755
Fam122b	0.207806	0.00205192	0.0179938	0.00198191	0.959609	0.744308
Apip	-0.103717	-0.0416239	0.135304	0.00198785	0.0829718	0.00349445
Angptl2	0.219467	-0.0798798	0.102642	0.00201156	0.107891	0.122617
Fam83a	0.799469	0.514156	-0.382535	0.00201214	0.0181346	0.11607
Gpaa1	-0.174675	-0.114482	0.132778	0.00203505	0.0170588	0.0298043
Mest	0.424861	-0.18733	-0.270339	0.00203751	0.0645693	0.0533227
Zfp386	-0.0935466	-0.0608728	0.2005	0.00206679	0.0177514	0.000380271
Trim66	-0.641869	-0.413138	0.458565	0.00207754	0.0185683	0.0373494
Zfp960	-0.162276	0.0454321	0.285492	0.00212642	0.197517	0.000982865
Tesc	-0.532908	-0.104361	0.175451	0.00213103	0.346561	0.253604
Hoga1	-0.293699	-0.204386	0.244165	0.00214734	0.0142253	0.0226737
Tomm40	-0.0792956	-0.131573	0.116727	0.00215345	0.000317941	0.00222709
Bsg	-0.196195	-0.0881806	0.0417917	0.00216249	0.0634822	0.443504
A530053G22Rik	0.354765	-0.108035	0.0252478	0.00216948	0.168604	0.792394
Zfp568	0.0922144	0.00789918	-0.0367846	0.00217253	0.669959	0.180485
Cbfa2t2	-0.0809311	0.000322004	0.106877	0.00217436	0.984053	0.00361635
Lrrc17	0.662386	0.397215	-0.614076	0.00217451	0.0249233	0.0153005
Fam120aos	-0.226209	-0.10363	0.200504	0.00217615	0.0602421	0.0181266
Zfp358	-0.102034	-0.0447031	0.0605837	0.00218564	0.0688649	0.0686835
Ak5	0.284524	0.199992	-0.39751	0.00218752	0.0139105	0.00284774
Egflam	0.273676	-0.0244282	-0.175901	0.0022475	0.659626	0.0553197
Casp7	0.27448	0.0266855	-0.0984113	0.0022588	0.632461	0.224343
Zmym3	0.146179	-0.0574009	0.0451828	0.0022764	0.0954085	0.286432
Cttn	0.135155	-0.00558826	-0.0367066	0.00229379	0.837753	0.343326
Crtap	0.161978	0.00841778	-0.073718	0.00229603	0.797197	0.13998
Rcan3	0.0958129	0.0130198	-0.105472	0.00229628	0.510182	0.0081694
Vgll3	0.509175	0.440797	-0.623116	0.00233633	0.00641557	0.00535979
C2cd2l	0.152312	-0.00208564	-0.0266228	0.002409	0.94642	0.534906
Ranbp6	0.145631	0.0553892	-0.0680762	0.00244739	0.107952	0.136113
Rnd1	0.450868	-0.0444771	-0.454635	0.00246415	0.634157	0.012343
Uchl3	-0.0663629	-0.0251538	0.0918771	0.00246514	0.109329	0.00333271
G630090E17Rik	-0.216641	-0.161373	0.0915882	0.00246928	0.012355	0.170094
Plxnb3	0.249562	0.189426	-0.113696	0.00247442	0.0114995	0.145056
Rbm15	0.2189	-0.116017	-0.0709102	0.00248265	0.0419892	0.274828
Cd163	0.30624	0.121851	-0.0587463	0.00255303	0.0986254	0.503001
AW011738	0.299732	-0.0463863	-0.163484	0.00256665	0.466921	0.0958192
C230091D08Rik	0.0659604	0.0757439	0.0193064	0.00260587	0.00211543	0.323222
Snhg5	0.10354	0.206742	-0.0795729	0.00264345	0.000164031	0.0351105
Pgm2	-0.122841	0.0170217	-0.00699234	0.00266621	0.515955	0.840518
Esyt2	0.150004	0.063299	-0.0138784	0.00266974	0.0867528	0.744564
Ppp1r15a	0.310529	-0.0260729	-0.16177	0.00268759	0.690188	0.110606
Maged2	0.157575	-0.0554881	-0.0795649	0.00274313	0.138033	0.120729
Prss23	0.300092	0.131871	-0.283126	0.0027504	0.079112	0.0175047
Ikbip	0.122181	-0.0162047	-0.0292855	0.00276466	0.536573	0.416614
Lig4	0.131654	0.105488	-0.0564395	0.00278508	0.0103273	0.174844
Col8a1	0.273448	-0.0787484	0.0445652	0.00282898	0.211456	0.575467
Pgf	0.82701	0.60076	-0.786242	0.00288108	0.0155734	0.0176988
Fndc5	-0.378801	-0.294904	-0.259802	0.00289517	0.0119778	0.0540777
Sptlc3	-0.664751	-0.201869	-0.124011	0.00290039	0.193433	0.525887
Hip1r	-0.304458	-0.182394	0.133391	0.00296	0.0319189	0.172064
Tmem180	0.161233	0.105138	-0.0888468	0.00296483	0.0237594	0.101591
Olfml2b	0.434224	0.0822528	-0.201584	0.00297099	0.394259	0.15253
Polr2m	-0.0709202	-0.0144477	0.0262952	0.00297252	0.362393	0.235895
Bmper	0.340199	0.116932	0.133837	0.00298092	0.151959	0.212655
Zfp687	0.114478	-0.00441748	-0.0419489	0.00303374	0.857606	0.242567
Rundc3a	-0.261317	-0.0719433	0.174179	0.00303529	0.235657	0.0609065
Mff	-0.0440391	-0.0444824	0.0635369	0.00303978	0.00431434	0.00342844
Nepn	0.46678	-0.0574007	-0.0835975	0.00305241	0.573979	0.546421
Cend1	-0.213286	-0.175311	0.015411	0.00305454	0.0101488	0.804639
Extl3	0.141616	0.030891	0.0166335	0.00305698	0.33521	0.689268
Srp54b	0.0826267	0.0354631	-0.0601274	0.0030646	0.090202	0.0468312
Pygb	0.271525	-0.048159	0.0199294	0.00308862	0.42676	0.802125
Pitpnm1	0.262125	0.0507528	-0.0308229	0.00309847	0.388884	0.689833
Cast	0.166269	0.044564	-0.0537683	0.00314562	0.249944	0.29864
Rnf41	0.174871	-0.0207919	-0.186831	0.00316011	0.589203	0.0122918
Adk	-0.123352	-0.0283671	0.114127	0.00316461	0.315614	0.0211802
Kif1c	-0.11311	-0.0022301	0.041929	0.00327977	0.928157	0.245171
Dusp15	-0.787792	-0.154185	0.403023	0.00328544	0.390066	0.129083
Parva	0.118487	0.00956354	0.0543785	0.00328875	0.714097	0.164307
Trib3	-0.415417	-0.0541334	0.166198	0.00332394	0.559612	0.215859
Erlin1	0.119277	0.0134025	-0.0987597	0.00333507	0.613531	0.0326739
Fastk	-0.0814899	-0.0539723	0.0557565	0.0033486	0.0248342	0.060261
Fbln5	0.278064	0.181129	-0.142397	0.00339567	0.0266412	0.131083
Car1	0.51192	0.122444	-0.0909778	0.00342421	0.306443	0.559477
Ppap2c	0.267288	-0.00825272	-0.0879178	0.0034265	0.888903	0.299803
Clip1	-0.152192	-0.00961933	0.0499854	0.00344326	0.775883	0.30093
Nicn1	0.0881438	-0.104844	0.0558378	0.00344828	0.00240533	0.076772
Rbfox2	-0.0937299	-0.102326	0.150376	0.0034813	0.00353314	0.0024705
Slc52a3	0.671523	0.492874	-0.529265	0.00348364	0.0176543	0.03983
Akap17b	0.139207	0.162913	-0.0997852	0.00349075	0.00261639	0.0538896
Zfp719	0.169228	0.0136581	-0.10335	0.00350932	0.718126	0.0858496
Stoml2	-0.0843901	-0.036627	0.0437047	0.00351673	0.0952182	0.130127
Col11a2	-0.254519	-0.287756	0.230659	0.00352431	0.00307285	0.0249497
Lrfn3	-0.278673	-0.00254511	0.102693	0.00358844	0.967358	0.256166
Myh7b	-0.962549	-0.17272	-0.0658076	0.0036382	0.438019	0.822039
Cbx4	0.214885	-0.0234446	-0.0726624	0.00368517	0.631341	0.295151
Zfp160	0.190395	0.00193102	-0.0918101	0.0036994	0.964009	0.156725
Yme1l1	0.0614605	0.0313831	0.0180998	0.0037405	0.0630371	0.356913
Uso1	0.0621167	0.060966	-0.0246843	0.00379777	0.00604773	0.23074
Uevld	0.15626	-0.0192969	0.0100468	0.00382136	0.591364	0.834288
Atp6v1c1	-0.0540733	-0.10244	0.106559	0.00382772	0.000316364	0.00108171
Slc25a3	-0.120745	-0.0288482	0.0625035	0.00382921	0.318174	0.136336
Col28a1	0.668679	0.310933	-0.518403	0.00386907	0.0840474	0.0454438
Plekhf1	-0.36824	-0.389124	0.385192	0.00389871	0.00454717	0.0160645
5430416N02Rik	0.28282	0.075347	-0.23054	0.0039124	0.273516	0.0389582
Kif27	0.218766	-0.297807	0.188589	0.00393302	0.00150853	0.0324407
Dhrs11	-0.0880557	-0.110469	0.103244	0.00393823	0.00217777	0.0104183
Gm4737	-0.308986	-0.0496658	0.131467	0.00395401	0.492508	0.207581
Per3	-0.139708	-0.186493	0.414956	0.00396433	0.00166165	0.000163444
Tc2n	-1.13076	-0.263546	0.923756	0.00396447	0.332517	0.039072
Atg2a	-0.0944673	-0.0908872	0.16728	0.00396581	0.00684852	0.00182233
Ccdc122	-0.177893	-0.025515	0.0724954	0.00396804	0.538526	0.224764
Hrh1	0.885528	0.50138	-0.866358	0.00400505	0.0482977	0.0210776
Zfp438	0.153618	-0.0700793	-0.0488164	0.00402262	0.0906619	0.330964
Bmp3	0.712872	0.414615	-0.311894	0.00404365	0.0446695	0.198936
Klf15	-0.349277	-0.222025	0.332607	0.00404492	0.0333462	0.0234362
Nrip2	0.335563	0.0958795	-0.224034	0.00412944	0.249562	0.0745157
H2-Q2	0.431583	0.36965	-0.573784	0.00414002	0.0113915	0.00656258
Mtr	0.158033	0.0149352	-0.0457322	0.00417541	0.685339	0.375861
Atp7a	0.119468	0.0959048	-0.0874567	0.00418951	0.0148001	0.0575116
Zfp862-ps	0.28071	0.14952	-0.132184	0.00420227	0.0602742	0.175241
Thnsl2	-0.227318	-0.162772	0.122689	0.00420579	0.022701	0.130224
Iglon5	0.417543	0.158007	-0.336184	0.00421771	0.146757	0.0429391
Hgsnat	0.0788463	-0.0633408	0.0552194	0.00422162	0.0148604	0.0659354
Pspc1	0.284981	-0.0413534	-0.12451	0.00422469	0.53969	0.203353
Fam217a	0.334162	0.0333662	-0.0941539	0.00423159	0.669852	0.388941
Adh1	0.106707	-0.0126272	0.0693205	0.00423899	0.614887	0.0817805
Pon1	-0.253783	-0.203553	0.217277	0.00425898	0.0150684	0.0353524
Slc31a1	0.0588607	-0.022555	-0.00512802	0.00426986	0.143641	0.782744
9430020K01Rik	0.120769	-0.00579865	-0.0407017	0.00428216	0.836788	0.311711
Srp54a	0.0574017	0.0223471	-0.0196499	0.00429217	0.138994	0.305183
Pde7b	-0.387603	-0.0319798	0.22115	0.00432661	0.725153	0.115893
Sgcb	-0.0905235	0.0409258	-0.0374511	0.00438214	0.0978364	0.227997
Tceal8	0.267079	-0.0954244	-0.06581	0.00440613	0.169627	0.451102
Gm11696	-0.214437	-0.117817	0.123785	0.00441641	0.0568673	0.113965
Tmem231	0.338783	0.0527565	-0.164475	0.00444994	0.516607	0.1692
Ak4	-0.339749	0.0401208	-0.0535632	0.00445493	0.61959	0.624376
Ptger1	-0.215661	-0.103758	0.163805	0.00446328	0.0838919	0.0537824
Car7	0.298409	0.104295	-0.202222	0.00448069	0.178853	0.075404
Orm3	-0.621821	-0.0777362	0.418857	0.00454527	0.601453	0.0774116
Tcp11l1	0.250843	-0.0188069	-0.101309	0.0045497	0.751892	0.241259
Prtg	0.65913	0.2625	-0.338629	0.00460233	0.137011	0.152604
Chmp4c	0.783329	0.412929	-0.637187	0.00465821	0.0667324	0.0447804
Tmem38b	0.0880252	0.0294856	-0.0211428	0.00470485	0.198759	0.468446
Smo	0.375958	0.0817185	-0.325579	0.00473408	0.381398	0.0369707
Il17re	0.443624	-0.116885	-0.281724	0.0047522	0.297698	0.093428
Maob	-0.0957595	-0.0533435	0.110026	0.00475505	0.0574871	0.0134065
Atpaf1	-0.102479	-0.0784234	0.0718712	0.00480352	0.0199691	0.0716734
Gbas	-0.137585	0.0311667	-0.0207162	0.0048155	0.365026	0.645608
C030006K11Rik	-0.0882249	-0.11268	0.0796081	0.00483945	0.00249166	0.0327705
Tusc5	0.300007	0.098308	-0.0548991	0.00484744	0.209849	0.578838
Lenep	-0.19759	-0.148498	0.133725	0.00486457	0.0215664	0.0798748
Flywch1	-0.0703423	-0.074769	0.111476	0.00489251	0.00555437	0.00368732
Sertad1	0.284682	-0.0822	-0.183355	0.00491854	0.262256	0.0919674
D230025D16Rik	-0.0642698	-0.0645329	0.118812	0.00493967	0.00710205	0.00189307
Efhd1	0.262291	0.0118028	-0.1062	0.00494365	0.851877	0.248241
Rbl2	-0.0848199	-0.0354784	0.105261	0.00495608	0.12735	0.0103021
Clca2	0.374869	-0.427631	-0.103114	0.00495814	0.00417342	0.415711
Fbln7	0.568965	0.189393	-0.292007	0.00496789	0.206036	0.158997
Ykt6	0.0433515	-0.0026988	0.00823691	0.00497161	0.796763	0.567118
Slc7a6	0.25724	-0.0232646	-0.0183295	0.00497559	0.709449	0.827517
Pigf	0.136009	0.0197672	-0.0357438	0.0049999	0.554367	0.436281
Fam20a	0.292297	0.0775752	-0.108435	0.00502634	0.300279	0.28661
Rfxank	0.0714819	-0.0487583	-0.0150139	0.00504896	0.0313232	0.529985
Htra2	-0.0977668	-0.0706367	0.128744	0.00513143	0.0259878	0.00839296
Acyp2	-0.140831	-0.0136073	0.0548245	0.00513994	0.693102	0.268418
Zfp955a	-0.167939	-0.0278236	0.115567	0.00515739	0.505663	0.0792547
Sh3d19	0.196013	-0.00121703	-0.0764274	0.00516079	0.979616	0.268158
Herpud1	-0.232245	-0.0442806	0.194302	0.00518438	0.447603	0.0443808
Smarcc1	0.131269	0.108812	-0.0852667	0.0051897	0.0158711	0.0930006
Ttc7	-0.501763	0.035204	0.0185178	0.00519416	0.774112	0.910887
Cplx2	0.280044	0.126239	-0.287757	0.00521855	0.109448	0.0221139
Slc26a2	0.359727	-0.0114089	-0.227776	0.00522719	0.896565	0.0998323
Amdhd1	-0.81431	-0.204703	0.146954	0.00531908	0.329694	0.591885
BC028528	-0.190536	-0.00505725	-0.00953511	0.00532895	0.913734	0.880166
Slc29a4	-0.485962	-0.139786	0.532896	0.00534766	0.272186	0.0177892
Cadm2	0.40116	0.163384	-0.178583	0.0053544	0.141233	0.217736
Kdm5a	0.122771	0.0428659	-0.0217521	0.00538465	0.195181	0.599486
Mall	0.363412	0.111722	-0.151206	0.00538873	0.245281	0.245461
D130020L05Rik	0.173336	0.051944	-0.084038	0.00540071	0.256027	0.1861
Fxyd1	-0.12384	-0.0303952	0.0469019	0.00540431	0.341825	0.285125
Mcee	-0.140555	-0.0594329	0.0099309	0.00540961	0.130341	0.832235
Cdk16	0.0618067	-0.0446614	0.0164072	0.00542107	0.0271963	0.440211
E2f3	0.164139	0.166695	-0.101715	0.00543348	0.00743739	0.107936
Gtf2a1	0.0845258	0.0115272	-0.00636792	0.00547076	0.586019	0.821825
Hcar1	0.458564	-0.12394	0.243052	0.0054828	0.301329	0.156031
Acadsb	-0.0917005	-0.132066	0.178728	0.00551551	0.00167581	0.00167958
Rbks	-0.292656	-0.0990304	0.259305	0.00554071	0.209696	0.038778
Rhot2	-0.0874612	-0.0725712	0.0705054	0.00554824	0.016788	0.0524707
Stx6	0.110144	0.00614915	-0.0418719	0.00556092	0.821916	0.286431
Hyou1	0.1949	0.0216472	-0.0409103	0.00556843	0.656978	0.539361
Glud1	-0.0820944	-0.168573	0.182565	0.0055976	0.000330067	0.000936767
Dbndd2	0.0843531	-0.0101196	-0.0058094	0.00562889	0.632914	0.837907
Ip6k3	-0.716623	0.151138	-0.197754	0.00563627	0.412678	0.427518
Gclc	0.120799	0.0645285	-0.0599992	0.00574377	0.0740808	0.182642
Gxylt2	0.627241	0.394038	-0.428707	0.00574507	0.0455153	0.0866179
Adat3	0.256253	0.0126834	-0.172411	0.00577834	0.84316	0.0906757
Anxa8	0.943198	-0.0517545	0.102418	0.00580314	0.82664	0.749606
Gamt	0.360034	0.202901	-0.121832	0.00581519	0.0640361	0.341571
H2-M9	0.571246	0.39882	-0.400394	0.0058242	0.0324948	0.0816061
Dsel	0.253764	0.125894	-0.115957	0.00583876	0.091667	0.215604
AI317395	-0.327109	-0.0899879	0.139085	0.0058541	0.300453	0.244678
Fbxo36	0.31047	-0.0253498	0.00450708	0.00585648	0.745806	0.965855
Itga8	0.436606	0.288791	-0.235011	0.00592299	0.0394493	0.157052
Armt1	-0.113707	-0.0100847	0.0655798	0.00594808	0.725977	0.135047
Phb	-0.0566647	-0.0722536	0.0355431	0.00595388	0.00311514	0.110586
Eme2	0.110023	-0.165237	0.141815	0.0059834	0.00151464	0.0105902
Fam124a	0.355282	0.295302	-0.267933	0.00602004	0.0179454	0.0678932
Heatr5a	0.120596	0.0923363	-0.0451508	0.00602219	0.0242208	0.301178
Rcan2	-0.255544	0.0264036	-0.0247389	0.00606722	0.685148	0.778047
Mlf2	-0.025647	-0.0677286	0.0728221	0.00607072	0.00010868	0.000327587
Plekhh1	0.547089	0.00105217	-0.576156	0.00609239	0.993931	0.0231246
Pcyt2	-0.209014	-0.0171647	0.111543	0.00611047	0.746876	0.162516
Nipsnap1	-0.370964	-0.0225851	0.0193633	0.00611839	0.810473	0.879081
Lrrc4	0.713776	0.656024	-0.699117	0.00612107	0.0124211	0.0299751
Efcab6	-0.73244	0.114747	-0.240514	0.00613117	0.54423	0.360335
Dtna	-0.425654	0.16913	-0.216577	0.00613388	0.160063	0.179617
Lgals1	0.266797	0.0787007	-0.124027	0.00615271	0.275719	0.213799
Atp6v1g2	0.246119	0.127708	-0.210163	0.00628786	0.0852517	0.0481511
Dynll2	-0.0752639	-0.146517	0.0847049	0.00635067	0.000489528	0.0188222
Sema3b	0.255003	0.219361	-0.332964	0.0063578	0.0165744	0.0106606
Fbxo31	-0.259496	-0.189531	0.303427	0.00644733	0.0302742	0.0165423
Vil1	-0.573637	-0.133975	0.1422	0.00646709	0.382522	0.486929
Arhgap19	0.323319	0.463325	-0.348739	0.00646881	0.00203351	0.0223479
Synpo2	-0.244951	0.241871	-0.256888	0.00650295	0.00991682	0.0248298
Pold2	0.0666887	0.0627968	-0.101569	0.00650534	0.0119658	0.00582728
Tmem5	0.131411	0.062648	-0.0826268	0.00653763	0.108905	0.11619
Papd4	0.128663	0.029087	-0.0500483	0.00653795	0.397937	0.293241
Tarbp2	-0.080876	-0.103089	0.13019	0.00655167	0.00344812	0.00464865
Csnk2a1	0.0335734	0.0160043	0.00940418	0.00657266	0.109278	0.436992
Hpd	-0.464968	-0.159902	0.35379	0.00661322	0.219968	0.0706292
Letm1	-0.16672	-0.0461397	0.106625	0.0066839	0.311682	0.112923
Rras2	0.115357	0.0713548	-0.0805007	0.00671407	0.053717	0.0905804
Klhl13	0.331155	0.0744823	-0.362627	0.00672761	0.403195	0.0218981
Coa3	-0.0598333	-0.0547888	0.0250392	0.0067374	0.013782	0.265295
Ttpa	-0.384206	-0.391644	0.542608	0.00675242	0.0090545	0.00825233
Adamts15	0.473521	-0.141397	0.112309	0.00675412	0.280089	0.509292
Dusp22	-0.0971456	-0.115333	0.160984	0.00675447	0.00482484	0.00423931
Sstr4	0.773373	0.50094	-0.682194	0.0067846	0.046899	0.0460504
Creg1	-0.166164	-0.0569373	0.137976	0.00683598	0.224571	0.055886
Cdadc1	0.0994096	-0.0286255	-0.0154771	0.00684041	0.296947	0.661614
Dand5	-0.113432	-0.183876	0.148578	0.00684937	0.00124216	0.0113047
Gapdh	-0.246025	0.101405	0.0316574	0.00685482	0.156742	0.716799
Tacc2	-0.223702	-0.00306674	0.0910508	0.00685888	0.957981	0.278845
Smoc2	0.118806	-0.0729062	0.0154571	0.00697318	0.0565985	0.714954
BC030336	-0.0732023	-0.0303359	0.107696	0.00698497	0.156456	0.00722274
Rorc	-0.180269	0.00171088	0.264072	0.00698747	0.971032	0.00735421
Nr1d2	-0.0912322	-0.0619458	0.128728	0.00705391	0.0415644	0.00864605
Csgalnact2	0.0906492	0.0898631	-0.125945	0.00707157	0.0105835	0.00922365
Ube2e3	-0.0897153	-0.0628046	0.109194	0.00708737	0.0377491	0.0155036
1700020I14Rik	0.102051	-0.0822032	0.0070383	0.00709476	0.0232748	0.846337
Dhrs7b	0.1756	-0.0322254	-0.00711428	0.0071003	0.495273	0.909261
Mgll	-0.132834	-0.173617	0.201766	0.00710493	0.0033682	0.00644078
Slc9a8	-0.0775874	-0.090999	0.127883	0.00714612	0.00538083	0.00459815
Hspa13	0.140514	0.0930434	-0.134272	0.00717069	0.0456384	0.0370967
Tspan11	0.617507	0.251339	-0.129583	0.00717236	0.164783	0.562838
Ankrd46	0.0864685	-0.0105733	-0.00694008	0.00729817	0.647149	0.822893
Klhl38	-0.620616	0.177469	-0.183089	0.00731861	0.30705	0.425899
Aspg	-0.547101	-0.164249	0.381026	0.0073246	0.286199	0.0962705
Clec18a	0.422889	0.00984071	-0.268831	0.00737259	0.929995	0.121418
Ago4	-0.155208	-0.0682467	0.160301	0.00737405	0.141388	0.0291641
Amot	-0.396728	0.0709168	-0.093843	0.00739187	0.509969	0.519189
Tstd3	-0.148282	0.0162948	0.0196216	0.00747258	0.681869	0.714932
Tjp2	0.0855991	-0.0169026	0.033	0.00749579	0.470358	0.311456
Pttg1ip	0.0519766	-0.0761366	0.070787	0.00752047	0.00217046	0.0106039
Cdr2l	0.193407	0.00747168	-0.104392	0.00754654	0.88478	0.176466
Apol6	0.380341	-0.000110583	0.0765976	0.00759085	0.99913	0.583217
Slc25a23	0.0775966	-0.0909899	0.0461167	0.00761814	0.00574998	0.144505
D330041H03Rik	0.161669	0.0319036	-0.062298	0.00762552	0.472379	0.313475
4930592A05Rik	0.13289	0.00623583	0.00556743	0.00767292	0.860911	0.907936
Gm15471	-0.553391	-0.360853	0.440676	0.00767426	0.0504633	0.0687693
Dnajc21	-0.0778065	0.0142964	0.00324095	0.00767723	0.502562	0.908475
Anapc15	0.0879379	-0.0353008	0.0305915	0.0077087	0.175828	0.359398
Rhobtb3	0.0801993	0.0385454	0.0352072	0.00771552	0.117874	0.2591
Gm6307	-0.565829	0.230308	-0.533914	0.00772579	0.171112	0.0410527
Cdk5rap1	0.27546	-0.068848	-0.02367	0.00772599	0.37175	0.813244
Chpf2	0.140961	0.0655495	0.0379644	0.00775116	0.127865	0.470731
Map1lc3a	0.194567	-0.058623	-0.00196032	0.00775421	0.290622	0.977855
Gcdh	-0.0827531	-0.140464	0.144168	0.00776763	0.00115824	0.00395934
Mlycd	-0.186026	-0.135894	0.143877	0.00781788	0.0354791	0.075692
Srpx	0.63817	0.410833	-0.405321	0.00782857	0.0533041	0.126001
Pdss2	-0.121694	-0.00562567	0.0258111	0.00782958	0.863619	0.566883
BC005561	0.202854	0.0354578	-0.0684296	0.00784857	0.524814	0.374855
Lmf1	0.0387452	-0.109619	0.0128137	0.0078689	0.00010561	0.383826
Celsr2	0.210646	-0.150557	0.0784765	0.0078904	0.0384354	0.331846
Coq10a	-0.120337	-0.0964754	0.0630021	0.0079106	0.0260232	0.191794
Poldip2	-0.0734347	-0.0734434	0.090676	0.00793972	0.0114288	0.0163072
Cpne1	0.115957	0.0435821	0.010276	0.00797902	0.203275	0.809023
Zkscan3	-0.144599	-0.089411	0.173371	0.00798178	0.061086	0.0182952
Gfod1	0.264537	0.0904437	-0.12336	0.00798972	0.240775	0.237805
Slc22a17	0.313443	-0.0274108	-0.0813179	0.00799609	0.747478	0.489483
Slc48a1	0.106077	-0.0362354	0.00489461	0.00800444	0.241315	0.899706
Nampt	-0.138333	-0.0755026	0.301641	0.00801491	0.087225	0.0015227
Mllt4	0.172171	-0.0401932	0.0672566	0.00802575	0.405735	0.312999
Bmp4	-0.284394	0.0327298	0.0652596	0.00802963	0.673338	0.539174
Mum1l1	-0.318563	-0.150801	0.192556	0.00813553	0.126095	0.144252
Cox10	-0.0548792	-0.0402025	0.0545314	0.00815695	0.0363947	0.0361795
Col6a2	0.244309	-0.0843004	-0.010789	0.00815881	0.239127	0.90443
Coasy	-0.115524	-0.100428	0.148551	0.00816912	0.0200018	0.0143549
Dram1	0.383506	0.162674	-0.0392139	0.00820337	0.161901	0.782015
9030617O03Rik	0.177087	0.0210334	-0.0455566	0.0082364	0.665631	0.49595
Slc25a34	-0.486539	-0.51744	-0.0247752	0.008241	0.00928575	0.890186
4930513N10Rik	0.465243	0.534489	-0.684841	0.00827573	0.00681195	0.00853445
Got1	-0.374098	0.020797	-0.125732	0.00830116	0.838757	0.382524
Rab6a	0.0750443	0.029419	-0.034706	0.00834207	0.191538	0.245514
Copz1	0.0606197	-0.0186545	0.0169847	0.00836485	0.289564	0.461982
H2-Q10	0.397949	0.305695	-0.526138	0.00836521	0.0316653	0.0131921
A230020J21Rik	0.356427	0.298082	-0.170746	0.00839016	0.0235758	0.231806
Gucy1a3	0.151241	0.0248711	0.0343608	0.00842579	0.555351	0.547635
9530068E07Rik	0.0702094	-0.0245334	-0.0156919	0.00847953	0.237875	0.554513
Uap1	0.0809277	-0.00164328	-0.0262498	0.0085089	0.940998	0.400754
5430405H02Rik	0.174292	0.117713	-0.0794917	0.00851664	0.0489905	0.253345
Ttc8	-0.270331	-0.108535	0.235908	0.0085602	0.185091	0.0568076
Msrb3	0.181883	0.140243	-0.0840347	0.00858486	0.0319541	0.248819
Ndn	0.222407	-0.0302484	-0.268679	0.00865086	0.625888	0.0191495
Tufm	-0.0852103	-0.0671715	0.0584609	0.00865361	0.0298198	0.110984
Slc44a3	0.267227	0.0488458	-0.0522116	0.00866081	0.516662	0.60565
Sparc	0.209247	-0.0656693	0.0285838	0.00866534	0.284895	0.716172
Matn2	0.345138	0.209733	-0.155591	0.00867167	0.0682509	0.260029
Npc2	0.199569	0.0813175	-0.0189605	0.00867484	0.180917	0.7997
Col1a2	0.386191	0.112262	-0.132542	0.0087207	0.318634	0.378689
Siva1	0.177057	-0.0850974	-0.0326954	0.00873504	0.126805	0.625767
Cgrrf1	-0.0838461	-0.0733221	0.101128	0.00873857	0.0208036	0.0194413
Fancm	0.180371	0.160506	-0.134586	0.00873969	0.0195171	0.090012
Prnp	0.10104	-0.0174869	0.0272402	0.00876932	0.539471	0.483007
Zfp704	0.14202	-0.0627721	-0.064799	0.00878575	0.153729	0.256369
Fgf7	0.614108	0.476403	-0.467513	0.00883328	0.0320617	0.0859016
Prkaa2	-0.121059	0.175359	-0.0284188	0.0088795	0.00273171	0.539989
Fbxl20	0.105627	0.0381411	0.0281914	0.00888127	0.229273	0.488483
Wwc2	0.153	0.0404391	-0.00627414	0.00889557	0.362465	0.913084
Acaa1b	-0.152013	-0.216941	0.19035	0.00889764	0.00292236	0.0171965
Gfra3	0.359974	0.0288579	-0.160187	0.00890858	0.773576	0.268261
Fam161b	0.0930472	-0.14562	0.00481235	0.00896179	0.00195967	0.89075
Ephx2	-0.20665	-0.252471	0.308773	0.0089714	0.00573255	0.00870952
Ctso	0.198091	0.109582	-0.0694154	0.00898365	0.0907342	0.372786
Lcor	0.184526	-0.0113703	-0.201303	0.00899526	0.825082	0.0285833
Oit3	0.733153	0.111937	-0.285549	0.00901534	0.589113	0.326813
Nap1l3	0.443677	0.367882	-0.729106	0.0090318	0.0259384	0.00593433
Zfp647	-0.163924	-0.0806763	0.142364	0.00908352	0.122666	0.0602418
1810037I17Rik	0.177984	-0.00591255	0.0294363	0.00909475	0.905236	0.664566
Clec11a	0.39179	0.129798	-0.255698	0.00928259	0.269191	0.130486
Slc16a5	-1.00198	-0.0271988	0.138043	0.00931235	0.922938	0.718674
Snx24	-0.295857	-0.0854095	0.0158447	0.00933536	0.329038	0.88804
0610009O20Rik	-0.0717164	-0.0514026	0.0596634	0.00937236	0.0437483	0.0698965
Grpel1	-0.0790937	-0.080151	0.0831048	0.00937966	0.0127546	0.0336932
Mrps27	-0.157942	-0.0435543	0.0875925	0.00939728	0.349832	0.186267
Slc52a2	-0.181797	-0.213368	0.13577	0.00939889	0.00710375	0.094198
Zfp955b	-0.184367	0.0241314	0.172045	0.00942926	0.645592	0.0497701
Gm12070	-0.232169	0.102846	0.0199077	0.00943901	0.158978	0.822433
Rec114	0.489484	0.651355	-0.52093	0.00948063	0.00423387	0.0325568
Sox5	0.166124	0.210287	-0.0595066	0.00949769	0.00524322	0.369223
Muc1	0.431423	0.128982	-0.424764	0.00954096	0.316147	0.0423671
9430083A17Rik	0.483751	0.248444	-0.344188	0.0095837	0.114293	0.107991
Cav2	0.174687	-0.0575822	0.126816	0.00958729	0.274719	0.102663
Slc35d2	0.190792	0.155437	-0.190943	0.00960127	0.0290993	0.0403823
Mrps6	0.121547	-0.0753708	-0.0118085	0.00961606	0.0693422	0.800344
Plekhg3	0.10236	-0.12587	0.0949954	0.0096313	0.00600709	0.0514694
Glt28d2	-0.154223	-0.0640976	0.184517	0.00963679	0.183227	0.0218879
Cdh15	-0.423231	0.176274	-0.614768	0.00964548	0.182539	0.0104823
Eno1b	-0.283625	-0.158676	0.371682	0.00965708	0.0923718	0.0156457
Tmem263	0.174073	0.00845675	-0.109238	0.00966735	0.863965	0.145973
Iars2	-0.078995	-0.0856412	0.12808	0.00969673	0.0101064	0.0067536
Pafah1b2	0.0612998	-0.0216995	0.00320365	0.0097221	0.246457	0.891814
Haus2	0.150809	0.0711612	-0.0687528	0.00972758	0.140718	0.267307
Rbms2	0.0990563	-0.0176632	0.115075	0.00972812	0.53791	0.024539
Fuca2	0.223587	0.158489	-0.138701	0.00976179	0.0468168	0.150533
Pepd	-0.18139	-0.0968481	0.235437	0.00976537	0.104979	0.0163956
Gdi1	0.111432	-0.0630177	0.0355877	0.00979418	0.090614	0.422736
Tmem167b	0.0688724	-0.000392046	0.00545691	0.00980858	0.984017	0.837201
Spats2l	0.187809	-0.030801	-0.188526	0.00981184	0.570635	0.0407005
Cox15	-0.118915	-0.047076	0.123062	0.00981813	0.203102	0.0368367
Gabra3	0.621557	0.517617	-0.501411	0.00987227	0.02762	0.0790861
Itga1	0.106878	-0.0921654	0.0932077	0.00988177	0.0244393	0.0633343
Tmem17	0.328506	0.100724	-0.204748	0.00989878	0.309186	0.150133
Mfsd12	0.286534	-0.00528976	-0.0508658	0.00990941	0.94834	0.649046
Gfm2	-0.0914271	-0.0184349	0.0467029	0.00993371	0.490659	0.222959
Myh11	0.178211	0.0168093	0.037659	0.00995616	0.742317	0.590137
Mr1	0.334355	0.283937	-0.332674	0.00995949	0.0259876	0.0423992
Cox7a1	-0.079296	-0.0868638	0.0405383	0.00997381	0.0099741	0.223045
Atpaf2	-0.0677193	-0.0705181	0.0629888	0.00997424	0.0121801	0.0525165
Lsm12	0.0827811	0.0371315	-0.0274529	0.0100295	0.159894	0.408952
Glb1l2	0.55542	0.0472822	-0.115583	0.0100574	0.766992	0.596542
Gpx7	0.262835	0.0283991	-0.0869641	0.0100619	0.707681	0.410307
Mamdc4	-0.222321	-0.316104	0.515818	0.0100756	0.00339959	0.00148738
Hbb-bs	3.68718	1.54242	-1.61608	0.0101162	0.185303	0.288169
Ivns1abp	0.161057	-0.150743	0.116026	0.0101168	0.0185336	0.108296
Fam162a	-0.0589995	-0.0493251	0.0634343	0.0101672	0.0279593	0.0333743
Cyb5r1	-0.0732913	-0.0327948	0.000583425	0.010217	0.162315	0.983661
Mterf2	-0.136556	-0.0517649	0.0607438	0.0102243	0.223936	0.282996
Mrps22	-0.084691	-0.0364092	0.0707066	0.0102265	0.176409	0.0736422
Arih2	0.016156	0.0123945	0.005459	0.0102449	0.0376933	0.403127
Pcdhb4	0.365243	0.0750638	0.0626213	0.0102929	0.486471	0.663009
Cox16	-0.174097	-0.0469498	0.0621094	0.0102976	0.369707	0.379916
Lpar4	0.264219	-0.100565	0.163499	0.0103278	0.223335	0.156069
Adamtsl3	0.389177	-0.074587	0.20752	0.0103878	0.515882	0.210553
Gsk3a	-0.0724989	-0.0719539	0.100668	0.0104714	0.0153634	0.0135542
Orc6	0.117042	-0.0781275	0.0610052	0.0104759	0.0594955	0.220277
Pih1d2	-0.224887	-0.00759341	0.183984	0.010514	0.907104	0.079479
Igfbp5	0.216366	0.0133685	-0.149692	0.0105793	0.831458	0.122868
Rmi1	0.0709935	0.0419533	-0.00872134	0.010589	0.084881	0.755362
Agpat9	0.40504	-0.103595	-0.0147409	0.0106033	0.396167	0.926128
Cd164	0.131884	0.0319235	0.0140736	0.0106246	0.420383	0.786566
Vit	0.571019	0.503805	-0.519102	0.0106313	0.024052	0.0591251
Gpr89	0.0709042	-0.0266479	-0.0264037	0.010645	0.231419	0.364754
Abca2	0.135587	0.0371583	-0.0445313	0.0107322	0.367212	0.420579
5930430L01Rik	-0.0650381	-0.153636	0.260033	0.0107384	0.000362374	0.000124844
Enc1	0.372487	-0.012017	0.0104379	0.0107609	0.911735	0.943287
Calu	0.114534	-0.0143341	-0.0244825	0.0107653	0.670079	0.593084
Glod4	0.0950137	-0.0314599	0.0370054	0.0108578	0.286127	0.347246
Fkbp14	0.142046	-0.0625697	0.0521023	0.0109044	0.173518	0.374069
Cyp2b10	-0.947953	-0.0387056	1.50383	0.0109075	0.88885	0.00833481
Pctp	-0.171268	-0.121353	0.188478	0.0109326	0.051261	0.0328181
Cdc25a	0.138727	0.170637	-0.11689	0.010949	0.00685905	0.0753302
S1pr5	-0.305754	0.0111693	0.0241747	0.0109528	0.900574	0.841912
Gatad1	-0.0421855	-0.0311709	0.0673073	0.0109759	0.0450657	0.00819578
Anxa2	0.243707	0.130574	-0.190751	0.0110056	0.112204	0.0924201
Yars2	-0.0948515	-0.0293901	0.0303403	0.0110261	0.31643	0.434943
Tmem65	0.110386	0.0849058	-0.0631597	0.0110382	0.0397635	0.189678
Sgol2a	-0.408364	0.213379	0.322311	0.011065	0.11967	0.0907252
Rspo4	-0.990867	0.728599	0.154946	0.0110854	0.0461377	0.695906
Tcf7l1	0.146259	0.00454812	-0.0130626	0.0110935	0.915557	0.822418
Nipa1	0.17589	-0.0156847	-0.0608032	0.0110985	0.762115	0.401998
Dffa	-0.112088	0.04074	-0.117489	0.0111181	0.249499	0.0391676
Ldha	-0.162899	0.0323559	0.120093	0.0111504	0.508706	0.108701
Chchd10	-0.0670724	-0.0755105	0.0707796	0.0111868	0.010039	0.038507
Slc4a7	0.146867	0.0256567	0.0825466	0.0112504	0.559891	0.198152
Pdgfra	0.347055	0.280611	-0.292378	0.0112858	0.0343238	0.0770047
Tdrd7	0.140904	0.0763026	0.00785633	0.0113117	0.111185	0.888931
Sema3e	0.342946	0.166551	-0.144429	0.0113446	0.143912	0.317923
Uba5	0.0839288	-0.00634403	-0.0406906	0.0113472	0.798326	0.257834
Mpzl1	0.153129	-0.141438	0.0285426	0.011349	0.0216463	0.644371
Eci3	0.153759	-0.304881	0.0976788	0.0113544	0.000876842	0.155302
Dnaja4	-0.173376	-0.0670719	0.0381383	0.0114417	0.227173	0.588332
Arf4	0.0859572	-0.0435821	0.0281986	0.0114485	0.131162	0.428171
Rnf103	0.103231	-0.00813714	0.0142767	0.0114516	0.790427	0.731239
Btf3l4	-0.0927048	-0.0188732	0.0702367	0.0114634	0.501552	0.103287
Trmt2b	0.0443769	-0.0271097	0.00944598	0.0114972	0.0820741	0.60053
Kidins220	0.103798	-0.0788353	0.0387086	0.0115193	0.042917	0.372916
Sema3g	0.224122	0.0439472	0.0457169	0.0115217	0.517236	0.615571
Col6a1	0.209319	-0.0683607	-0.00401593	0.0115479	0.298743	0.961837
Ccl27a	-0.206554	-0.157865	0.132712	0.0116068	0.0423208	0.15339
Zfp788	-0.169884	-0.0604326	0.198467	0.0116364	0.263239	0.0282182
Cdc42	0.101775	0.066911	-0.0994779	0.0116485	0.0673549	0.0508628
Rab33b	0.094234	-0.00783163	-0.0288585	0.011655	0.780369	0.459554
Tmem141	0.189573	-0.0889711	-0.0811953	0.0116657	0.157513	0.313678
Azgp1	-0.774476	-0.365079	0.544343	0.0117159	0.156404	0.125855
Tceal1	0.211462	0.0202642	-0.278116	0.0117168	0.748479	0.0185389
Acsf2	-0.245647	0.0288648	0.232561	0.0117255	0.695048	0.0563902
Fkbp7	0.111234	0.00679752	-0.0133161	0.0117444	0.83755	0.767305
Afap1l2	0.279008	-0.0154313	-0.156522	0.0117491	0.852743	0.203053
Acss3	-0.203441	0.101977	0.26879	0.0117589	0.136786	0.0182894
Nmrk2	-0.944753	0.179396	-0.0767498	0.0117854	0.532277	0.840591
Opcml	0.409732	-0.0626939	-0.222667	0.0118288	0.612523	0.21599
Zdhhc2	0.141944	-0.164731	0.173898	0.0118581	0.00943509	0.0242716
Gphn	-0.0669162	-0.0170369	0.133937	0.0118714	0.410681	0.0034388
H2afy2	-0.138318	-0.214925	0.176717	0.0118996	0.00277447	0.0209286
Cc2d2a	0.105196	-0.0674553	0.0237926	0.011911	0.0735354	0.581957
Wbp1	0.0846221	-0.0830863	0.0769951	0.0119318	0.0181224	0.0643329
Atp5b	-0.043042	-0.0803846	0.0591882	0.0119342	0.00122281	0.0159678
Ccdc50	0.0795339	0.0692459	-0.0402331	0.011944	0.0279848	0.245697
Plscr2	0.280524	0.109397	-0.000915242	0.0119602	0.228483	0.993565
Acad12	0.0726955	-0.127646	0.101557	0.0119612	0.0016209	0.0150718
Ogn	0.296691	0.194769	-0.289861	0.0119811	0.0690628	0.0520841
Asah2	0.0723759	-0.0057454	-0.0243445	0.0120625	0.791684	0.423124
Ophn1	0.134525	-0.0844395	0.112667	0.012112	0.0790088	0.0822667
Igsf21	-0.119063	0.0149262	-0.105733	0.0121332	0.678737	0.0698932
Slc4a4	-0.261177	-0.2826	0.493189	0.0121332	0.0127298	0.00452232
Sgce	0.132198	-0.0356844	-0.0593262	0.0121552	0.387774	0.298032
2310033P09Rik	0.132681	0.0645755	-0.170803	0.0121607	0.148963	0.020775
Fxn	-0.124486	-0.11364	0.0394358	0.0121719	0.0240828	0.449885
Pdia5	-0.135448	-0.172068	0.131866	0.0121934	0.0067235	0.0533863
3830417A13Rik	0.409553	-0.0157464	-0.138586	0.0122008	0.898211	0.421793
Coro6	-0.351256	-0.0509582	0.163504	0.0122539	0.633615	0.283249
Fras1	0.866563	-0.199632	-0.840871	0.0122758	0.457387	0.0542139
Lhpp	0.147675	-0.0504088	0.0391671	0.0123059	0.286743	0.524365
Smdt1	-0.0739772	-0.072303	0.0801066	0.0124213	0.0191499	0.0386247
Scand1	-0.187497	-0.0453549	0.0163074	0.0124683	0.438258	0.831949
Commd10	0.117633	0.0635054	-0.0882012	0.0124997	0.119232	0.112058
Rufy3	0.0650754	0.0183175	-0.0238588	0.012532	0.372829	0.389838
Htra1	0.242323	0.0781383	-0.162878	0.0125357	0.313342	0.145068
Fgd1	0.145229	0.0161134	-0.0545179	0.012611	0.716056	0.380192
Hemk1	0.195372	-0.0512151	0.0148496	0.0126459	0.405024	0.853323
Fzd5	0.314503	0.0785423	-0.0960088	0.0126499	0.426119	0.469742
9330162012Rik	0.156948	0.0204075	0.0535739	0.0126608	0.67104	0.422131
AW554918	0.1116	0.177219	-0.192623	0.0126902	0.00271147	0.00691487
Lrrc9	0.218226	-0.0351519	-0.127919	0.0127323	0.601161	0.194252
Pemt	0.110433	-0.0321139	-0.0193744	0.0127639	0.360594	0.672738
Thsd7a	0.289006	0.381109	-0.205323	0.0127648	0.00604706	0.12922
Rnls	-0.151313	0.0897455	0.0741074	0.0128276	0.095742	0.266713
Hsd17b14	-0.318145	-0.577372	0.219924	0.0128346	0.00151559	0.138075
Cbx5	0.102313	0.0527259	0.0202138	0.0128391	0.135184	0.635671
Dynlrb1	0.104776	-0.0426089	-0.0115826	0.0128432	0.219119	0.789252
Rnf13	0.0702928	-0.00260989	0.00274833	0.0128845	0.903038	0.924493
Slc2a9	-0.145435	0.0422125	0.0572721	0.0128854	0.362496	0.361604
Arsj	0.801146	0.901848	-1.16212	0.0129474	0.0116427	0.0141088
Copb2	0.081707	0.0553374	-0.0446478	0.0129754	0.0669585	0.223176
Aldh16a1	-0.0386932	-0.0183742	0.00127427	0.0129761	0.162811	0.936479
Mtpn	0.0702293	0.0422155	-0.0292922	0.0129788	0.0931749	0.3372
Gm973	0.58704	0.262471	-0.417393	0.0130108	0.184398	0.130468
Seh1l	0.0567695	-0.00481215	0.00305371	0.0130206	0.782202	0.896579
Glis2	0.202274	0.0867906	-0.206601	0.0130333	0.199876	0.0485089
Rnf4	0.0844624	-0.0143628	-0.0290227	0.0130446	0.583964	0.422597
Pold4	0.237832	0.104734	-0.215142	0.0130813	0.190498	0.0700698
Pbld1	-0.280174	-0.168912	0.380776	0.0130859	0.0929732	0.0182358
Nf2	-0.031352	-0.0202428	0.0574654	0.0131008	0.0772602	0.0055741
Topors	0.134985	-0.0253409	-0.00841888	0.0131676	0.547807	0.880585
Tom1	-0.109274	-0.0352426	0.0797942	0.0131731	0.31882	0.123464
1810014B01Rik	-0.0988022	-0.118593	0.0664978	0.0132045	0.00920862	0.148995
Ndufa11	-0.0899977	-0.0934464	0.0816753	0.0132205	0.0162227	0.0699701
Inca1	0.133482	-0.214814	0.17267	0.0132351	0.002682	0.022095
Gm5523	-0.227785	0.0997851	0.0170123	0.0132454	0.193646	0.857524
Cx3cl1	0.471916	0.121752	-0.465008	0.0132801	0.417458	0.0550328
A230056P14Rik	0.614975	0.412897	-0.469203	0.0133182	0.070008	0.11177
Col18a1	0.286069	0.0606566	-0.0548028	0.0133201	0.500678	0.648778
Oxnad1	-0.0717762	-0.0707458	0.125181	0.0133509	0.0198815	0.00699238
Bcat2	-0.189909	-0.291468	0.323737	0.0133779	0.00333898	0.00769455
Ddx3x	0.0888392	-0.136871	-0.00766606	0.0133857	0.00328614	0.836211
Ndufaf4	-0.134594	0.0387384	0.00258923	0.013417	0.370785	0.96318
Capns1	-0.0681849	-0.0752661	0.056957	0.0134962	0.0131033	0.0893357
Gm6525	-0.499189	-0.578555	0.903055	0.0135013	0.010833	0.00608243
Lcmt2	0.109808	0.0476683	-0.0614015	0.0135368	0.199176	0.218413
Mcam	0.327378	-0.0144379	-0.0318287	0.0135522	0.886463	0.816501
Hp	0.267324	0.0953651	-0.00778289	0.0136313	0.279199	0.944537
Plcd1	-0.152581	-0.175366	0.204717	0.0136563	0.0113276	0.0199208
Adamts4	0.40862	-0.0860468	-0.310295	0.0136676	0.506196	0.114956
Col3a1	0.361454	-0.00806272	-0.103105	0.0136976	0.94254	0.506249
Tmem144	0.41664	0.345829	-0.459474	0.0137315	0.0372097	0.0396064
Anapc1	0.0834751	0.00779441	0.0620683	0.0137832	0.764294	0.121603
Epha1	0.804106	0.438556	-0.699685	0.013786	0.123626	0.0811864
Atp11c	0.0853091	0.0352568	-0.000486765	0.0137993	0.22008	0.989154
Satb2	-0.227664	-0.182576	0.32798	0.0138036	0.0418423	0.0154306
Ehbp1	0.155044	0.049076	-0.0646643	0.0138386	0.332575	0.344505
Lum	0.45746	0.0356268	-0.178614	0.0139035	0.802666	0.37401
Snx18	0.0783244	0.016658	-0.0853148	0.0139183	0.504083	0.0417109
Mapk13	0.661556	0.295853	-0.875885	0.0140764	0.191837	0.0215229
Atat1	-0.0977132	-0.161115	0.210642	0.0140839	0.00258761	0.00301693
Tha1	-0.176879	-0.13567	0.147547	0.0140916	0.0490571	0.0923767
Fyttd1	0.0544103	0.0252869	-0.0170674	0.0141018	0.177953	0.470143
Fgf11	0.208449	-0.22533	0.0563668	0.0141493	0.0148871	0.530979
Spag1	-0.303007	-0.161866	0.251882	0.0141778	0.132032	0.0936174
Adarb1	0.136674	-0.0980223	0.149339	0.0141865	0.0605588	0.04196
Mmp2	0.325842	0.0233927	-0.168248	0.0142139	0.81874	0.255755
Tmem47	0.0883931	0.0361367	-0.0298991	0.0143013	0.228077	0.439675
Ypel2	0.16379	0.137429	-0.0229753	0.0143022	0.0371849	0.742033
Rtn4rl1	0.191173	-0.118266	0.159477	0.0143915	0.092706	0.0937129
Wbp5	0.24465	0.0519871	-0.292046	0.0143961	0.508002	0.0316581
Clic4	0.120069	-0.0476044	0.0165885	0.0144265	0.241356	0.746292
L3hypdh	-0.0827277	-0.141767	0.171058	0.0144268	0.00224388	0.00371423
Ubac1	-0.0815059	2.80909e-05	0.0270972	0.0145011	0.999124	0.448618
Uba2	0.0696347	0.0499454	-0.0413897	0.0145289	0.0616782	0.201923
Col4a3	0.26083	0.274383	-0.265531	0.0145371	0.0169487	0.0535229
Stk16	-0.0807668	-0.0787598	0.0871691	0.0145987	0.0224989	0.044723
2310045N01Rik	-0.0409028	-0.0351028	0.0477216	0.014642	0.0352033	0.0347297
Alas1	0.348663	0.00771085	-0.0247192	0.0146518	0.94402	0.86812
Gm8801	0.308806	-0.235895	0.0375101	0.0146579	0.0513045	0.776685
Ugp2	-0.157945	0.0545282	0.0348034	0.0147188	0.301814	0.610751
Pde5a	0.117711	-0.122838	0.0787255	0.0147654	0.0177337	0.160826
Stk3	0.113786	0.038496	-0.100438	0.0149483	0.312331	0.0827147
Cipc	-0.143446	-0.117327	0.178391	0.0149506	0.0419959	0.0284435
Zfp963	-0.289084	-0.0517559	0.226945	0.0149769	0.57828	0.112337
Eps8	0.158804	-0.0996993	0.205677	0.0149839	0.0916893	0.0247047
Gla	0.108488	0.0223664	0.00673888	0.0150001	0.524444	0.884995
0610012G03Rik	-0.0609395	-0.0592255	0.0459754	0.0150049	0.0233704	0.123838
Gchfr	-1.55928	-0.0981585	-0.0804547	0.0150223	0.842887	0.90437
Tef	-0.187818	-0.143072	0.321081	0.0150427	0.0528479	0.00861213
C1qbp	-0.0483398	-0.0817959	0.0320572	0.0151111	0.00250382	0.165823
Col1a1	0.39458	0.070755	-0.124935	0.0151201	0.578619	0.47387
Iscu	-0.0649977	-0.0758057	0.0606773	0.0151203	0.0118713	0.071333
Synpo	-0.149253	0.0511999	-0.105287	0.015146	0.307817	0.145337
Psmc4	-0.0896336	-0.0302755	0.0586446	0.0151467	0.314541	0.170752
Hint1	-0.0788874	-0.0334336	0.0606264	0.0151487	0.219771	0.11919
9130019O22Rik	0.150991	0.119963	-0.019654	0.015185	0.0466966	0.763425
Lmln	0.216855	0.0693608	0.0135096	0.0151898	0.33867	0.885038
Chst11	0.380397	0.0494714	-0.19993	0.015215	0.685232	0.255794
Ap1m1	-0.0955753	-0.0383434	0.0921869	0.0152784	0.242674	0.0654227
Abi2	0.183755	-0.106279	0.0164013	0.0153189	0.114677	0.836441
Gng7	0.152261	-0.109727	0.0278503	0.0153308	0.0634092	0.674545
Plxna1	0.154613	0.0605678	-0.0543238	0.0153517	0.252978	0.431317
Yaf2	-0.0883848	-0.0109478	0.107709	0.0153716	0.699984	0.0312856
Zbtb37	0.210758	0.0709535	-0.207661	0.0153983	0.317859	0.0618215
Xirp1	-0.614154	-0.0766326	-0.227365	0.0154403	0.698246	0.409315
Art3	0.16451	-0.0783332	0.010287	0.0154432	0.177784	0.885108
Fbxl5	0.121317	0.0958397	-0.0852342	0.0154692	0.0482807	0.148456
Tsfm	-0.0721891	-0.110072	0.0784788	0.0154772	0.00404701	0.0458902
Acp5	0.175427	0.0153855	0.0852411	0.015506	0.784611	0.291042
Nav3	0.288485	-0.19573	-0.0560581	0.0155202	0.0761105	0.656927
Ttc7b	0.0961733	0.0321788	-0.0692983	0.0155472	0.321646	0.140747
Greb1	0.501194	0.37614	-0.19569	0.0155619	0.0568383	0.386956
Zbtb3	-0.165042	0.125865	-0.0137094	0.0155709	0.0541541	0.848236
Kdm6b	0.139895	-0.0961081	-0.0302865	0.0155797	0.0736907	0.621935
Tlk1	-0.0734939	0.0637212	0.0334456	0.0156505	0.0360689	0.320449
Tmem45a	0.408644	0.311201	-0.442863	0.0156582	0.0546342	0.0467998
Serpine1	0.447721	-0.33365	0.151746	0.015669	0.0583776	0.44907
Fbxw2	0.0393341	-0.00278446	0.0653926	0.0156813	0.825663	0.0100643
Pptc7	0.0496822	0.0119125	-0.00377718	0.0157367	0.467779	0.861299
Pex7	-0.0663217	-0.0914098	0.0731798	0.0157468	0.00631777	0.0444056
Rarres2	0.248989	0.0185837	-0.158478	0.0157803	0.816704	0.184501
Entpd2	0.309716	0.0690282	-0.132594	0.0158134	0.498633	0.348375
Slc24a2	-0.746549	-0.840073	0.943379	0.0158239	0.0142846	0.0283406
Mief2	-0.140121	-0.085331	0.133897	0.0158966	0.103319	0.069287
Pla2g15	0.159728	-0.0823666	-0.0534079	0.0159259	0.153037	0.45666
Mbnl3	-0.107462	0.0472644	-0.0398971	0.0159262	0.210447	0.411633
Kirrel	0.397188	0.102102	-0.188301	0.015927	0.439536	0.304692
Alkbh6	-0.0918178	-0.0803942	0.0377978	0.0160059	0.0356033	0.366994
Palmd	0.18928	-0.012557	0.00550684	0.0160693	0.837442	0.94691
Blcap	0.181025	-0.0781429	-0.00837997	0.0160807	0.21874	0.915669
Gpc3	0.256367	0.140459	-0.385067	0.0161065	0.134555	0.0153569
Gm13051	-0.252462	-0.0762745	0.122649	0.0161608	0.37088	0.295817
Zfp518b	0.208161	0.129501	-0.0017658	0.016161	0.0989212	0.98453
Antxr2	0.224479	0.0378265	-0.189445	0.0161733	0.607266	0.0984962
Cfap69	-0.471874	-0.327183	0.31485	0.0161837	0.0738624	0.169997
Zfp787	-0.106178	-0.0950305	0.111534	0.0161936	0.0334143	0.0530396
Mccc1	-0.117747	-0.110956	0.130346	0.0161966	0.0279969	0.0450054
Zfp449	0.17373	0.0975151	-0.014188	0.0162451	0.127877	0.85239
Cptp	0.0906204	0.112643	-0.0651152	0.0162749	0.00996575	0.145512
Myog	-0.96875	0.138068	-0.0671943	0.0163045	0.663157	0.874485
Spon1	0.66137	0.163215	-0.482374	0.0163132	0.459637	0.14093
Asphd2	0.426571	0.421779	-0.528024	0.0163456	0.0238225	0.0313499
Plekhg6	0.584449	0.0601745	-0.037602	0.0163487	0.752025	0.88357
Lzic	0.12643	-0.0979658	-0.076647	0.0163842	0.0537474	0.206467
Peg13	0.124055	0.0571567	-0.010432	0.0164422	0.19596	0.848554
Phyh	0.0576982	-0.108158	0.0674011	0.0164463	0.00175386	0.0382977
BC026585	0.118	-0.162003	0.028454	0.01645	0.00673554	0.589223
Apba2	0.504647	0.589147	-0.74677	0.0165086	0.0129438	0.0166542
Hyal2	0.0786575	0.058954	-0.0454271	0.0165089	0.0598102	0.226228
1110001J03Rik	-0.0842423	-0.0877511	0.0493746	0.0165311	0.019936	0.220533
Cdh9	-0.447589	-0.183163	0.473807	0.0165557	0.243241	0.0527386
Zbtb6	0.0890578	-0.0420766	0.0209877	0.0165581	0.187314	0.598064
Zfp839	-0.0508641	-0.0936628	0.136645	0.0165697	0.00191649	0.00136978
Polr3k	0.121824	0.0854224	-0.035335	0.0165699	0.07283	0.519651
3830408C21Rik	0.244655	-0.136757	0.242888	0.0165801	0.130766	0.0640508
Slc37a3	0.0707678	-0.0125196	-0.0755349	0.0165973	0.592465	0.0515148
Cish	1.25245	-0.159172	0.0306564	0.0166353	0.698634	0.955729
Abhd4	0.0466138	-0.0986414	0.0532847	0.0167203	0.0010324	0.0417075
Rfx7	-0.215096	0.00874506	0.0486403	0.016756	0.900898	0.613625
Zfp219	-0.0741486	-0.0750072	0.0654003	0.016772	0.0224935	0.0899748
Slc13a3	0.315588	0.225571	-0.481481	0.0167766	0.0696036	0.0150787
Gm10046	0.337193	-0.0784778	-0.150966	0.0167777	0.487282	0.335627
Fetub	-0.320573	-0.15524	0.411759	0.0167873	0.179667	0.0282761
Rbpms2	-0.0837939	-0.11807	0.135737	0.0168233	0.00619947	0.0119998
3110043O21Rik	0.207405	-0.126238	0.000981006	0.0168261	0.107471	0.991466
Them4	-0.130467	-0.0156475	0.0285095	0.0168512	0.715516	0.625816
Csnk1a1	0.0707316	0.0283867	-0.0250073	0.0168619	0.253245	0.439317
Rem1	-0.238063	-0.116744	-0.0153136	0.0169009	0.175796	0.884605
Auh	0.0659578	-0.0677671	-0.005716	0.016902	0.0214202	0.845124
1700019G17Rik	-0.347844	-0.0841867	0.376888	0.0169641	0.472219	0.0500641
Mocs2	-0.0961181	-0.0656104	0.174495	0.0170006	0.0800363	0.00769479
Rps6kb1	0.0393541	-0.00630319	0.108973	0.0170276	0.629293	0.00123379
Rbms1	0.0879526	0.0480052	-0.0381335	0.0170637	0.140545	0.351683
4930415O20Rik	-0.460185	-0.169712	0.351203	0.0170668	0.290243	0.13058
Yipf5	0.11153	0.004182	-0.0334481	0.0170778	0.909014	0.509462
Psmc5	-0.0622463	-0.0651978	0.0652628	0.0171209	0.020217	0.0558182
Coq6	-0.0526653	-0.110809	0.0690063	0.017136	0.00109211	0.0268838
Actg1	0.298786	0.122907	-0.288101	0.017208	0.245322	0.0717168
Cers2	0.0660294	-0.0128826	0.0218279	0.0172464	0.560151	0.4704
Ctsk	0.567948	0.247322	-0.275163	0.0172775	0.222813	0.30466
Gm14327	-0.230234	-0.0347813	0.195498	0.0173033	0.64981	0.101537
Sdhaf4	-0.0867816	-0.102251	0.0433215	0.0173956	0.0131826	0.292553
Nid2	0.259944	-0.0187998	-0.0161615	0.0173989	0.826715	0.889287
Psmc3	-0.0632419	-0.0406998	0.0516581	0.0174205	0.0954124	0.112431
Tmem254b	0.324014	0.0749356	-0.231372	0.0174367	0.49412	0.153579
Atg4b	0.0298827	-0.00255902	-0.0343701	0.0174686	0.795889	0.0424595
Tmem184c	0.096769	-0.00579023	-0.0147133	0.0175026	0.856382	0.735255
Fbxo32	-0.334081	0.137337	-0.0244115	0.0175275	0.247601	0.870345
Egln1	-0.165326	-0.018942	-0.00320047	0.0175323	0.730269	0.965465
Abca3	0.15445	0.0285838	-0.00775815	0.0175444	0.581497	0.910618
Ppp1r10	0.313656	-0.163107	-0.0877835	0.0175783	0.159031	0.539951
Fam195a	-0.0892604	-0.139461	0.0923398	0.0176085	0.00422184	0.059453
Cage1	0.352687	0.182471	-0.459176	0.0176295	0.161031	0.028231
Eif4e2	0.0558107	-0.0120877	0.0119112	0.0176448	0.521955	0.637748
Tmem43	0.235623	0.0589786	-0.0125362	0.0177001	0.462834	0.905581
Ddt	-0.21281	-0.196796	0.25228	0.0177481	0.0324903	0.039012
Polr3h	0.139749	-0.0501876	0.0132658	0.0177603	0.306269	0.832821
Cpxm2	0.496126	0.284201	-0.302996	0.0177738	0.128967	0.212003
Clpp	-0.0608473	-0.0940201	0.0913218	0.0178047	0.00448264	0.0170364
Rnf181	0.0944211	0.0307007	-0.0191303	0.0178146	0.350023	0.655317
Pgbd1	-0.377282	-0.126616	0.509468	0.0178157	0.336153	0.0250742
Cog4	0.0586708	-0.0497854	0.0677515	0.0178281	0.0433612	0.0426602
Hspa14	0.0901525	0.034573	-0.0749678	0.017829	0.278552	0.109225
Lurap1l	0.292101	-0.0887346	-0.101199	0.017835	0.380012	0.454385
Ninj1	0.171394	0.0375774	-0.216397	0.0178445	0.518282	0.0317395
Rgl2	-0.141063	-0.141128	0.156547	0.0178592	0.0248526	0.0484904
Actr1a	0.0541277	0.0325602	-0.0103088	0.0178849	0.1152	0.674706
Hs3st1	0.302073	0.219692	-0.314543	0.0178912	0.0695697	0.0590511
Zfp664	0.0574659	-0.0559916	0.0460598	0.0179007	0.0273446	0.119846
Tubb4b	-0.0817003	0.0148312	-0.0577182	0.0179117	0.590514	0.159608
Ankrd50	0.109442	-0.00995343	-0.0637934	0.0180245	0.785383	0.231908
Odf2	0.0597796	0.0474703	-0.0476222	0.0180293	0.0539174	0.122177
Cnn1	0.391975	0.0581092	-0.213766	0.0180782	0.659479	0.259488
Acot11	-0.395446	0.102882	0.139907	0.0180881	0.448909	0.44706
Mcf2l	-0.335635	-0.25525	0.536257	0.018178	0.0618318	0.0137177
H2-T22	0.287373	0.185502	-0.194551	0.0182588	0.0978192	0.176256
C1s2	0.336409	0.226613	-0.284219	0.0183204	0.0876236	0.106911
9230110C19Rik	0.167156	-0.0786592	0.0915806	0.0183217	0.198897	0.259068
Tmem254c	-2.21705	-1.09704	1.04345	0.0183462	0.180458	0.324244
Sde2	0.195431	-0.0561043	-0.157339	0.0184688	0.408854	0.120989
Lipt1	-0.124844	-0.0820612	0.132939	0.0184711	0.0940665	0.0566458
Postn	0.157719	-0.146932	0.126678	0.0185495	0.0329894	0.122017
Egfl8	0.194232	-0.00521123	0.0410991	0.0185516	0.936232	0.644929
Wdr83	-0.0543893	-0.0914887	0.0937847	0.0185522	0.00326289	0.0104024
Dnaja3	-0.0937335	-0.0806176	0.0909765	0.0186019	0.0430752	0.0746896
Chst15	0.293988	0.13696	0.148014	0.018608	0.204303	0.296669
Gm8923	0.496286	0.468342	-0.398211	0.0186578	0.0317422	0.12277
Ddx28	-0.0607628	-0.0845986	0.107815	0.0186816	0.00731414	0.00935046
2310015A10Rik	-0.112978	-0.0529298	0.117735	0.0187602	0.202994	0.0611993
Gpcpd1	-0.141695	-0.0390783	0.0491917	0.0187661	0.428125	0.45932
Fads2	0.298844	0.0927821	-0.288054	0.0187964	0.376653	0.0767562
Mdfic	0.191374	0.0665586	-0.114864	0.0188035	0.326896	0.22477
Oaf	0.193591	-0.0493936	-0.0407061	0.0188442	0.46187	0.648318
Fbp2	-0.481117	-0.00464143	0.263569	0.0188887	0.977154	0.262533
Mid2	0.148934	-0.00389071	0.0549032	0.0189019	0.938218	0.434522
Gcsh	0.050394	-0.0959953	0.030312	0.0189577	0.00193539	0.224794
Socs6	-0.0585649	0.0162522	0.0627692	0.0190285	0.427068	0.0569074
Nkrf	0.169989	0.0648211	-0.251349	0.019084	0.288783	0.0193051
Dnajc11	-0.0941882	-0.141626	0.17332	0.019128	0.00545771	0.00828432
Chpf	0.171014	0.00806041	-0.0831148	0.0191299	0.88922	0.315171
Hspa5	0.0961814	-0.0127765	-0.0212059	0.0191381	0.696752	0.634238
Ift43	0.245395	0.036935	-0.125139	0.0193041	0.660272	0.295438
2410016O06Rik	0.158835	-0.0379266	-0.114794	0.0193153	0.492312	0.158788
Ankrd24	-0.0930458	-0.147205	0.155628	0.0193382	0.0044576	0.0122556
Egf	-0.373785	0.0906993	0.0182969	0.0193437	0.485839	0.915134
Arhgef19	-0.202688	-0.110409	-0.0722676	0.019368	0.152229	0.451627
Angel2	-0.0704925	-0.0244011	0.0934618	0.0193764	0.332514	0.0289535
Sycp2	-0.38826	-0.348089	0.651318	0.0193776	0.0390082	0.0121416
Mrc2	0.204516	-0.15696	0.162474	0.019406	0.0634104	0.128888
Clec3b	0.256045	-0.0114247	-0.0977967	0.0194137	0.895495	0.422331
Zfp946	-0.108318	-0.0840867	0.213376	0.0195402	0.0616421	0.00641509
Sdha	-0.070875	-0.0738984	0.103947	0.0195467	0.0233922	0.0203726
Dsn1	0.44948	0.350485	-0.346594	0.0195876	0.0609524	0.138851
Sp3os	0.276542	0.06737	-0.300435	0.0195896	0.485616	0.0559386
Wbscr22	-0.0341108	-0.0112854	0.0804124	0.0196658	0.35411	0.00300829
Mtbp	0.34459	0.269378	-0.333787	0.0196756	0.0607137	0.0783692
Retnla	0.29057	-0.195209	-0.222976	0.0196977	0.0929782	0.140863
Gde1	-0.0981232	-0.0374081	0.145502	0.0197744	0.293015	0.0197935
Nts	0.67194	0.174305	-1.21662	0.0197864	0.460459	0.00917729
Naa50	-0.0421038	-0.00744851	0.0121646	0.0198018	0.609241	0.540077
Padi2	-0.607661	0.151441	-0.273092	0.0198588	0.477705	0.353861
Stard7	-0.0426422	-0.0608652	0.0878278	0.0198788	0.00707658	0.00543203
Tceal5	-0.496477	-0.215011	0.0334163	0.019955	0.240618	0.884539
Flad1	-0.0667543	-0.0584209	0.0723174	0.0199729	0.0433364	0.0573268
Fam53c	0.132417	0.0134524	-0.117976	0.0200233	0.767659	0.099298
Adgrl2	0.140457	-0.0127218	-0.0893905	0.0200629	0.792153	0.208721
Hdac3	0.0622756	-0.0597712	0.036081	0.0201054	0.0321079	0.246364
Chd4	0.127115	0.0524156	-0.0838202	0.0201065	0.261691	0.195459
Faxc	0.353865	0.0833917	-0.224421	0.0201526	0.502419	0.210544
2020-09-02	0.0734954	-0.0211866	0.0112727	0.0201636	0.417402	0.742585
Mup21	0.736311	0.500785	-0.830804	0.0202403	0.091783	0.0511753
Narf	-0.1774	0.0194147	0.0244338	0.0202911	0.751329	0.768179
Tdrp	0.237679	0.0318308	-0.0449114	0.0203447	0.699148	0.687357
Klb	0.263199	-0.00401249	0.0299796	0.0204059	0.964656	0.807422
Coq9	-0.0468913	-0.0741474	0.0664272	0.0204481	0.00476501	0.0241451
Igsf3	0.258177	0.29895	-0.516743	0.0204951	0.0166826	0.00633799
Ppif	-0.110656	-0.158128	0.126822	0.0205098	0.00729381	0.0492968
Atp4b	-0.878891	0.300132	0.476168	0.0205196	0.345296	0.276678
Zfand6	-0.0772973	-0.0663077	0.0875004	0.0205306	0.0473103	0.0512779
Myl6	0.106618	-0.0553769	-0.0226946	0.0205577	0.174154	0.651963
Cep72	0.11362	0.230775	-0.236932	0.0206397	0.00161006	0.00538353
Baiap2	0.41663	-0.0359999	-0.168136	0.02067	0.803012	0.405835
Pxdn	0.181962	-0.132075	0.0667289	0.0207382	0.0783378	0.447574
Sdc1	0.528694	0.23546	-0.313558	0.0207546	0.233635	0.240363
Stx18	0.106581	-0.0513595	0.0223939	0.0207594	0.202753	0.656916
Tmem70	-0.0695666	-0.0601723	0.0557441	0.0208019	0.0466139	0.13202
Cpt2	-0.141056	-0.0887915	0.179834	0.020804	0.113962	0.0353502
Kifc3	0.254712	-0.00343555	-0.216389	0.0208329	0.968904	0.114983
Mpc2	-0.0890108	-0.000289376	0.0155376	0.0208418	0.992503	0.711504
Zfp37	0.388582	0.16884	-0.293963	0.0208599	0.244212	0.150533
Zfp930	-0.111048	-0.00456862	0.192737	0.0208619	0.905449	0.0114975
Pphln1	0.0672982	0.0509725	-0.0155544	0.0208712	0.0698039	0.626379
Mettl9	0.0368738	-0.0690981	0.0517201	0.0208742	0.00233898	0.0255202
Gys1	-0.0928894	-0.0533019	0.0968194	0.0208768	0.141962	0.0666232
Crispld2	0.217946	0.111529	-0.089982	0.0209246	0.181223	0.397346
Tmem241	0.0608876	-0.0356161	0.0410587	0.0209281	0.136125	0.191188
Grb14	0.295848	0.10814	-0.111307	0.0209835	0.318228	0.437987
Fads1	0.352237	0.156868	-0.312347	0.0209864	0.234874	0.103856
9130401M01Rik	0.108524	0.0657282	-0.0550789	0.0210233	0.12592	0.307534
Lix1l	0.12212	-0.0632328	-0.0300238	0.0211358	0.17797	0.606371
Ybey	-0.138609	-0.0237926	0.134842	0.0211598	0.625772	0.0818103
Ccdc158	0.476677	-0.27712	0.0335966	0.0212035	0.139176	0.881118
Pdlim5	-0.18099	0.141806	-0.0635947	0.0212186	0.0641035	0.468353
Tmem237	0.104804	0.0598989	-0.0558226	0.0212738	0.1449	0.28814
Pla2g4e	-0.603409	0.170439	-0.60932	0.0213233	0.432829	0.0741786
Gm4925	-0.230036	-0.342232	0.455036	0.0213316	0.00645853	0.00696212
Ptcd2	-0.0920918	-0.0244502	0.111471	0.0213468	0.459417	0.0429127
Rergl	-0.241119	-0.256715	0.519995	0.0213494	0.0236621	0.00485838
Pik3ip1	-0.325813	0.0551231	0.233935	0.0213527	0.631451	0.1705
Cd14	0.408769	0.0281462	0.129137	0.0213633	0.843639	0.512926
Rbm46	0.380078	-0.00469958	-0.0184963	0.0213639	0.971688	0.917874
Sptb	-0.504691	0.257496	-0.290396	0.0214016	0.184556	0.256266
Cyp2d22	-0.252357	-0.10961	0.184956	0.0214033	0.247255	0.163579
Nadk2	-0.0891866	-0.0320791	0.0739087	0.0214377	0.327819	0.124405
Hdlbp	0.0767342	-0.00772418	0.0385708	0.0214711	0.773906	0.31423
Galt	-0.0818195	-0.058488	0.0249526	0.0214734	0.0838732	0.527559
Hook2	-0.201559	-0.100225	0.142055	0.0214742	0.19441	0.177652
Paox	0.110613	-0.0289716	-0.0040717	0.0214991	0.465974	0.937924
Urod	-0.0466552	-0.0446606	0.0669952	0.0215085	0.0344886	0.024171
Cadps2	0.478905	0.0858299	-0.3252	0.0216167	0.613058	0.191905
Hexim1	0.157637	-0.0556651	-0.0488358	0.0216347	0.336976	0.522144
Tpm3	-0.363542	-0.138366	0.132207	0.0217539	0.304987	0.456723
Mmp15	0.179975	-0.0164722	-0.068633	0.0218148	0.79466	0.436774
Eif2ak2	0.181149	0.124264	-0.0820506	0.0218402	0.0948031	0.361867
Zfp810	0.165015	0.0788063	0.156887	0.0218505	0.211617	0.0891627
Osbp2	-0.248917	-0.223924	0.155883	0.0218666	0.0429602	0.224265
Atxn1l	0.0799953	0.0390517	-0.0628727	0.0218717	0.203273	0.142372
Glul	-0.156695	-0.0437075	0.328701	0.0218719	0.441234	0.00561413
Hspa9	-0.0870371	-0.0575159	0.0985833	0.0219182	0.104639	0.0540999
Cd164l2	0.257692	0.0969836	0.355329	0.0219254	0.310788	0.0284126
Pask	0.177458	0.144408	-0.123821	0.0219613	0.0589177	0.183513
Slc16a1	0.235405	0.0341026	-0.205186	0.0219791	0.682626	0.111933
Fuom	-0.0973724	-0.122625	0.0948302	0.0220058	0.0130457	0.0840052
Jmjd7	0.257121	-0.14418	0.168587	0.022016	0.154247	0.207061
Cnih4	0.0667715	0.0226056	-0.0526632	0.0220477	0.357755	0.141962
LOC100503496	-0.503617	-0.31065	0.323142	0.0220816	0.124505	0.215763
Gm5069	-0.223302	0.101782	0.0195387	0.0221509	0.231518	0.854541
Lgals6	2.68396	2.07063	-1.73543	0.0222784	0.0697158	0.213723
Nudt5	0.0872812	0.00575743	0.0320493	0.0223007	0.851838	0.455531
Rnf115	-0.104673	0.0853198	-0.0385948	0.0223175	0.0594115	0.453862
Tmem45b	0.376999	0.0372359	-0.0313761	0.0223342	0.780327	0.861858
Arl16	0.121656	0.0177676	-0.0330286	0.0223977	0.681772	0.57647
Ppp1r14a	0.186609	-0.141505	0.0651079	0.0224239	0.0736035	0.477687
Msto1	0.0948687	-0.0345844	-0.0193285	0.0224313	0.327411	0.672981
Nlgn3	0.294416	-0.027961	-0.19779	0.0224631	0.788831	0.19991
Sucnr1	0.950611	0.762398	-0.704108	0.022476	0.0627088	0.164592
Copb1	0.057928	-0.0141834	0.0106525	0.0224946	0.499145	0.70296
Kif5c	0.512562	0.541612	-0.712929	0.0225291	0.0256259	0.0282969
Slc35f5	0.0857304	-0.0893677	0.0128212	0.0225563	0.0269141	0.756021
Mtg2	-0.110849	-0.0825896	0.070242	0.0226617	0.0779672	0.223507
Fus	0.127588	-0.0488478	-0.00206321	0.0226755	0.307399	0.973099
Igf1	0.717602	0.346574	-0.32967	0.022686	0.211289	0.360264
Dock7	0.170324	0.101955	-0.093462	0.0227263	0.136023	0.283215
Creb3l1	0.394649	0.189925	-0.245216	0.0227894	0.213156	0.23196
Rpap2	0.0595501	0.023929	0.0116686	0.0228672	0.287581	0.686152
Car3	0.216026	-0.102226	0.200563	0.0228769	0.220167	0.0981322
Ufd1l	0.0493565	-0.0393178	0.0794004	0.0228853	0.0649157	0.0169769
Mrpl42	-0.0532898	-0.0447302	0.016719	0.0228916	0.0555437	0.523334
Cald1	0.155704	0.0453899	-0.0909118	0.0229523	0.427995	0.258219
Tgfb1i1	0.160656	-0.119833	-0.0242642	0.0229616	0.0785163	0.754871
Cpd	0.090329	-0.0116486	0.139691	0.0230292	0.718821	0.0197849
Morf4l2	0.0969195	0.00184666	-0.0156174	0.0230302	0.957284	0.739437
4430402I18Rik	0.10924	-0.129047	0.0990164	0.0230476	0.0174735	0.104896
Eln	0.171307	0.172073	-0.0225486	0.0230544	0.0312597	0.785509
Nsun4	-0.0970559	-0.0428916	0.0951211	0.0230577	0.248602	0.0855273
Zfp384	-0.0742776	-0.0607032	0.0548057	0.0230938	0.0606419	0.168539
Pgrmc2	0.114981	-0.038338	0.0405941	0.0231428	0.370356	0.476408
Pde9a	0.275586	0.0303964	0.0507072	0.0231935	0.758148	0.705159
Moxd1	0.280188	0.00748637	-0.134486	0.023262	0.940301	0.344079
Fam171a2	0.27367	0.160537	-0.156487	0.0232627	0.144473	0.268517
Klhl15	0.177713	-0.016859	-0.119861	0.0232847	0.791085	0.202195
Plod3	0.115346	-0.0426128	0.0567772	0.0233222	0.326323	0.333356
Eif6	-0.135287	-0.0363496	0.0448143	0.0233341	0.464783	0.503624
Fam129a	0.155453	0.0241864	-0.017201	0.0233744	0.66628	0.819511
B4galt2	0.174155	-0.0467598	-0.0629028	0.0233877	0.465347	0.468084
Kdelr2	0.115905	-0.0198679	-0.0451898	0.0233965	0.635494	0.435592
1700040L02Rik	-0.226177	-0.174918	2.85101e-06	0.0234045	0.071994	0.999979
Irak1bp1	0.140392	-0.115741	0.203425	0.023405	0.0597439	0.0254397
B930041F14Rik	-0.293749	0.0709673	0.0533395	0.0234181	0.509124	0.70953
Ces2g	0.613385	0.605046	-0.798895	0.0234321	0.0337657	0.0367344
Brd3	-0.0819737	-0.0515711	0.105886	0.0234709	0.123685	0.0378141
Mrpl20	-0.0548473	-0.0673858	0.0909026	0.0234824	0.015369	0.0155872
Fkbp1a	0.0803214	-0.0112483	0.0016983	0.0235152	0.69782	0.965186
3110039I08Rik	0.272741	0.248145	-0.286588	0.0235198	0.0442076	0.071567
Pcyox1	0.0991684	-0.0253454	0.0168011	0.0235255	0.486623	0.728263
Trmt10a	0.0933659	-0.0592515	0.0129012	0.0235325	0.121355	0.776438
Ndufaf3	0.0783158	-0.0448996	-0.0085912	0.0235715	0.153175	0.821437
Kcnq1	0.25724	-0.0414455	-0.0468773	0.0236544	0.656452	0.70932
Clp1	0.14671	-0.086233	-0.0458754	0.0236958	0.14549	0.528462
Bend7	-0.121516	-0.0950172	0.185855	0.0237766	0.070648	0.0212829
Nr2c1	-0.0755077	-0.0715613	0.0779121	0.0238332	0.0391905	0.0761309
Nsun3	-0.173611	-0.0468972	0.156334	0.0238377	0.465035	0.109185
H13	-0.158316	-0.040732	0.0433471	0.0239283	0.485834	0.580116
4921507P07Rik	0.196594	0.0360602	0.0104067	0.0239308	0.614792	0.913455
Bckdha	-0.107931	-0.126348	0.131198	0.0239656	0.0188213	0.0469032
Tnfrsf21	0.200336	0.0126498	-0.0335765	0.0239699	0.860866	0.732362
Zdhhc9	0.117511	-0.0380513	-0.00735613	0.0239961	0.387633	0.897838
Fzd4	0.258709	-0.113289	0.102515	0.0240395	0.25719	0.431876
Lgi1	0.270747	-0.108689	-0.106505	0.0241031	0.294286	0.435337
Ints6	0.178213	0.0395502	-0.19711	0.0241067	0.545891	0.0629219
Slc39a6	0.242034	0.203685	-0.255361	0.0241112	0.0575793	0.0721525
Prorsd1	0.0445972	-0.000663301	0.0528228	0.0241446	0.967084	0.0512082
Zbtb42	0.220494	0.270622	-0.266367	0.0241801	0.0159149	0.0482087
Scarf1	-0.166573	-0.243778	0.27699	0.0242145	0.0079823	0.0159011
Sync	-0.218056	0.249042	-0.253661	0.0242161	0.0208308	0.0542718
Hspb8	-0.253495	0.164323	-0.0424076	0.0242387	0.117624	0.733622
Tmem8	-0.221775	0.00499894	0.105241	0.0242805	0.950217	0.354344
Ankrd23	-0.625126	0.227389	-0.452415	0.0242896	0.338072	0.180421
Etohd2	-0.140597	-0.103242	0.178373	0.0243487	0.0857191	0.0414816
Mrpl44	-0.0784289	-0.0992729	0.12735	0.0243518	0.0142593	0.017494
Oma1	-0.0612643	0.0303475	-0.0097131	0.0243698	0.209211	0.747271
Rapgef1	-0.0867427	0.0370748	0.00316189	0.0243709	0.268933	0.940626
Gm9961	0.873448	-0.0389825	-0.488684	0.0243827	0.901792	0.283302
Gpr153	0.237623	-0.0563277	0.0370997	0.0243833	0.521281	0.75099
Zdhhc12	0.204992	0.0849001	-0.102317	0.0243974	0.282391	0.33278
2610027K06Rik	-0.0869281	-0.171723	0.25594	0.0244344	0.00224632	0.00146145
Dlgap1	0.343837	-0.371046	-0.0132944	0.0244535	0.0257912	0.93709
B330016D10Rik	-0.140547	-0.0877369	0.117263	0.0244681	0.129467	0.133428
Zbtb24	0.0883741	0.0480029	-0.0694905	0.0245322	0.17564	0.152615
Ptp4a3	-0.342452	0.223742	-0.229994	0.0245323	0.116345	0.209414
1700037H04Rik	-0.126928	0.0559667	0.139177	0.0245566	0.256804	0.0655319
Nabp1	0.327422	-0.0770181	-0.0802576	0.0246382	0.525506	0.622069
Limk2	0.0702671	0.0377281	-0.0847016	0.0246796	0.180401	0.0494196
Zfp653	-0.165216	-0.126703	0.163933	0.0247154	0.0769596	0.0871729
Prpf38a	0.0874175	0.00800429	-0.0849631	0.0247875	0.801551	0.0923133
Appl1	0.0935623	0.126031	-0.118902	0.0247882	0.0114182	0.0419318
Tmem168	0.0964648	0.0240989	-0.0101606	0.0248372	0.502215	0.830845
Pdgfd	0.267477	-0.00320272	-0.0748871	0.0248982	0.973724	0.576014
Unc119	0.29654	0.172935	-0.326763	0.0249333	0.152736	0.0654069
Pde4dip	-0.278796	0.13344	-0.192949	0.0249439	0.225226	0.199723
Cmc4	0.196295	-0.022442	-0.0379365	0.0249471	0.754529	0.697114
Agmo	0.112513	-0.0914473	0.0681273	0.0249825	0.0657605	0.252961
Tmem52	-0.443537	0.243729	-0.321369	0.0250692	0.173682	0.183217
Aig1	-0.153197	-0.0860811	0.105133	0.025109	0.166022	0.203637
Cav1	0.0954351	-0.0647464	0.0892634	0.025133	0.107807	0.103006
Hist1h1c	-0.147323	0.0151299	-0.0237973	0.0251524	0.779085	0.7449
Fxr1	-0.0963442	0.0995229	-0.0372113	0.0251566	0.0308784	0.448335
Comtd1	-0.197406	-0.221738	0.236052	0.0251652	0.0230082	0.051544
Acvr2a	0.0955859	-0.00579898	-0.0115139	0.02518	0.868065	0.80787
Epb4.1l1	0.172925	-0.0607138	0.0820142	0.0251864	0.358077	0.359109
Gm6498	-0.273872	0.0252366	0.0666247	0.0251871	0.801194	0.626721
Ammecr1l	0.104506	-0.0391754	-0.0488248	0.0252221	0.329533	0.36589
Aldoa	-0.226976	0.125095	0.0148877	0.0252257	0.173258	0.894472
Per2	-0.408251	-0.444609	0.638673	0.0252361	0.0257642	0.0208319
Las1l	0.106826	-0.0336694	-0.0463653	0.0252769	0.405828	0.398452
Rcl1	-0.126586	-0.0822605	0.125255	0.0253523	0.120539	0.0895237
Wrn	0.117405	0.0734775	-0.0347413	0.0253902	0.131856	0.557355
Wnt5a	0.164266	-0.0163042	0.00600816	0.025394	0.78681	0.941108
Jph1	-0.372944	0.139073	-0.216548	0.0254509	0.332937	0.272673
Sh3yl1	0.288662	-0.0393101	-0.216578	0.0254543	0.711719	0.172247
Ccnb1	0.8097	1.1497	-0.925588	0.0254619	0.00954687	0.0597145
Enthd2	-0.13465	-0.0755425	0.126479	0.0254861	0.16802	0.102922
Pycr1	0.697644	0.501019	-0.749986	0.025495	0.0941403	0.0715264
Pdk2	-0.0734972	-0.0692501	0.0845786	0.0255408	0.0425537	0.0586861
Ect2	0.632992	0.932717	-1.01178	0.0255984	0.00827332	0.019539
Dram2	0.059081	-0.0838377	0.0804582	0.0256462	0.00964882	0.0344424
Bcap31	-0.0404957	-0.0529054	0.113034	0.0256685	0.0133663	0.00197672
Pts	-0.053162	-0.0768045	0.0793371	0.0256836	0.00899357	0.0251313
Kcnc4	-0.603306	0.240375	-0.350544	0.025712	0.305369	0.273604
Ngfr	0.595586	0.344873	-0.654064	0.0257157	0.158034	0.0677503
Enox1	0.184449	-0.0758144	-0.0834555	0.0257169	0.291974	0.382372
Sfxn1	-0.168409	-0.0602376	0.237992	0.0257724	0.352764	0.0305105
Mrvi1	0.175078	-0.039892	0.0756902	0.0257925	0.543053	0.402663
Hace1	0.152042	0.0823072	-0.148686	0.0257954	0.181944	0.0935578
Fam57b	-0.299391	0.202121	-0.0894229	0.0258218	0.111229	0.555618
Coq4	-0.051406	-0.0780165	0.0590599	0.0258466	0.00741753	0.0595728
Mal2	0.381015	0.0537431	-0.284755	0.0258512	0.70326	0.175182
Lactb	-0.0902492	-0.0638299	0.0975878	0.025959	0.0992663	0.071377
Pebp1	-0.0713372	-0.0302334	0.0600436	0.025967	0.28007	0.135897
Cep295	0.215617	0.256546	-0.240319	0.0259717	0.0192689	0.0654264
Esyt1	0.243905	0.0122738	-0.0826386	0.0259954	0.891331	0.506773
Wdr78	0.304703	0.180229	-0.257869	0.0260002	0.151964	0.134317
Spag5	0.459886	0.551887	-0.730134	0.0260031	0.0186923	0.020359
Gprin3	0.235271	0.207235	-0.0403404	0.0260094	0.0534758	0.732412
Samd15	0.467034	0.199958	-0.584877	0.0260524	0.276147	0.0459774
Snx4	0.0530514	0.056872	-0.0607349	0.0260983	0.0281544	0.0607007
Rwdd4a	0.0718766	-0.045858	-0.0328846	0.0261688	0.128608	0.37966
Hddc3	0.085846	-0.100398	0.0724005	0.0261783	0.0206964	0.135987
Slc35g1	-0.0763084	0.0106853	-0.084915	0.0261832	0.706282	0.0661742
Zscan21	0.0889458	-0.0479363	-0.114778	0.0261884	0.185127	0.04196
Gm13889	0.328331	0.332414	-0.417856	0.0262613	0.0344557	0.043989
Ndufb3	0.071331	-0.0276978	-0.00609287	0.0262779	0.319226	0.8645
Zfpm2	0.19466	0.145442	-0.0556598	0.0263827	0.0869481	0.57428
Gbp2b	0.339928	0.220968	-0.210695	0.0264051	0.123806	0.249777
Atp1b1	-0.178259	-0.0943939	-0.0488866	0.0264163	0.192532	0.58966
Gpi1	-0.166824	0.0825612	0.0431384	0.0264563	0.218593	0.610615
Zfp3	-0.0698298	-0.0196437	0.0169998	0.0264675	0.460356	0.63117
Fam184a	0.355507	0.11196	0.0923433	0.0265404	0.412188	0.609367
Gstm7	-0.300857	-0.246122	0.181109	0.0265612	0.067862	0.262594
Tmem106c	0.0911899	-0.108979	-0.00243573	0.026571	0.0194161	0.957516
Grik5	0.136927	-0.179343	0.0770678	0.0266984	0.013817	0.291702
Mtap7d3	0.281495	0.0885709	-0.0496792	0.026716	0.413398	0.726964
Mrpl3	-0.0566242	-0.0891208	0.0704048	0.0267439	0.00664571	0.0481513
Txlng	-0.125722	-0.112731	0.243203	0.0267536	0.0518833	0.0098514
Cant1	0.104374	0.0114178	-0.0597732	0.0267778	0.769195	0.284648
Sgpl1	-0.222238	-0.229439	0.295188	0.0267959	0.0328845	0.0390051
Mrpl54	-0.0956773	-0.0304324	-0.00753578	0.0268032	0.409084	0.87563
Mbd3	-0.0665572	-0.0466326	0.0600564	0.0268392	0.104174	0.11794
Map1b	0.269712	-0.00332123	0.0450379	0.0268526	0.97355	0.741303
Sncg	0.495994	-0.138108	-0.336096	0.0268925	0.466583	0.21604
Cables1	-0.260142	-0.105826	0.0967101	0.0269236	0.30203	0.472621
Lrrc20	-0.276246	0.190318	-0.262552	0.026934	0.108952	0.10395
Adra2a	0.510133	0.677124	-0.734407	0.0269395	0.013255	0.0298883
Micu1	-0.0830553	-0.0266566	0.0341044	0.0269796	0.405975	0.430564
Taf1d	0.141829	-0.0651542	-0.0888535	0.02704	0.251109	0.24816
Jrk	0.24905	0.139144	-0.155225	0.0270864	0.175582	0.250477
Mapre3	-0.150751	-0.0262551	0.0214504	0.0271139	0.643883	0.778717
Fcgr4	0.959162	0.795836	-0.935131	0.0271212	0.0662655	0.097874
Scyl1	-0.0731535	-0.00186181	0.0237695	0.0271555	0.94555	0.528491
Hic2	0.197208	-0.229644	0.0404822	0.0271622	0.0218427	0.686708
Nfyc	-0.105797	-0.0713454	0.140392	0.027183	0.115604	0.0396553
Dynlt3	0.0963876	0.027734	-0.0375864	0.0272366	0.454236	0.453846
Gtf2i	-0.0309543	-0.0577671	0.066743	0.0272462	0.00330065	0.00647176
Nell1	0.547724	-0.22868	-0.104974	0.0272527	0.292335	0.706447
Wdr45b	0.0705246	-0.0117255	-0.0074834	0.0272729	0.65919	0.833985
Akap10	0.0674863	0.0212672	-0.0303623	0.0273034	0.415416	0.392307
Rerg	0.434874	0.213521	-0.490225	0.0273429	0.225432	0.0660563
Gm15401	-0.890618	-0.736863	1.09844	0.0273722	0.0673279	0.05042
Grhpr	0.0517641	-0.0978279	0.108199	0.0273983	0.00314631	0.00740323
Slc19a1	0.185381	0.0670772	-0.0785663	0.0274112	0.355393	0.418847
Ptprk	-0.229633	-0.0263136	-0.112214	0.0274365	0.760268	0.35664
Pfkl	-0.190898	-0.0268184	0.131217	0.0274547	0.709092	0.212772
Lrrc41	0.0541444	-0.0274483	-0.055517	0.0275895	0.21386	0.0867849
Bccip	-0.0383179	-0.0208673	0.0317871	0.0276003	0.186786	0.146009
Cryl1	0.164383	-0.0402003	-0.0487909	0.0276489	0.523037	0.565342
Anxa4	0.167337	0.0171233	-0.0345715	0.0276792	0.785565	0.686408
Maoa	0.0860467	-0.00591809	0.0213007	0.0276903	0.854601	0.629891
Pitx2	-0.503215	-0.135025	-0.112022	0.0277002	0.485575	0.66405
Reep5	0.0449094	-0.0412428	0.0496541	0.0277539	0.0497631	0.0707222
Vamp1	-0.286898	-0.0331382	0.221833	0.0278116	0.759329	0.170511
Inpp5f	0.133753	0.0934029	-0.00977967	0.0278202	0.107793	0.885668
Vamp3	0.0358278	-0.0124184	0.010122	0.0278637	0.376329	0.584402
Zfp870	-0.109099	0.0376193	0.101905	0.0278818	0.378692	0.111297
BC020402	-0.113951	-0.183564	0.216564	0.0279031	0.0063464	0.0110832
Dpt	0.245455	0.00617923	-0.185945	0.0279195	0.946564	0.178174
S100a11	0.103285	0.0119553	-0.0497016	0.0280091	0.759308	0.365994
Emc4	-0.0273467	-0.00197005	0.0259641	0.0280096	0.848304	0.107206
Dennd2a	0.253346	-0.0771839	0.0644642	0.0280187	0.433242	0.621767
Scarb1	0.253432	0.0140034	0.0372377	0.0280639	0.883326	0.773911
Slc7a4	0.480919	-0.136713	-0.0859947	0.0280996	0.46314	0.727301
Plk4	0.215589	0.119497	-0.160876	0.028137	0.182354	0.184439
Mgme1	0.167177	0.0796964	-0.00497082	0.0281584	0.240683	0.95349
Itgb1	0.0818827	0.00974416	-0.0117131	0.0281971	0.753287	0.779975
Mccc2	-0.0665288	-0.0941785	0.12398	0.0282049	0.0108487	0.0121166
Rcor2	-0.180528	-0.158059	0.073813	0.0282067	0.0584297	0.437875
Olfr558	0.253414	0.0313599	-0.0517768	0.0282116	0.743925	0.691207
Slc25a20	-0.0985999	-0.110671	0.112742	0.0282205	0.0259111	0.065064
Dupd1	-0.870036	-0.145969	0.17926	0.0282304	0.659445	0.68884
Cd81	0.0794641	-0.123517	0.0636683	0.0282739	0.00746853	0.159841
Cdk1	0.868381	1.03449	-1.09683	0.0282745	0.020965	0.0481787
Gm13152	-0.226991	-0.00108404	0.0013119	0.0284054	0.989903	0.990976
Pparg	-0.0595179	-0.114318	0.0927447	0.0284744	0.00307637	0.023924
Sipa1l3	0.140722	-0.00909448	-0.067219	0.0284825	0.864345	0.371348
Dhx35	-0.104625	-0.000454725	0.0335269	0.0284866	0.990819	0.539311
Myo6	0.0640173	-0.142083	0.0712698	0.0285275	0.00162495	0.0709249
Zbtb11os1	0.0964411	-0.0670908	-0.0169377	0.0285572	0.110875	0.73309
Kat8	-0.0881519	-0.0630257	0.0225321	0.0286353	0.103723	0.622353
Met	0.11052	-0.0396088	0.0910379	0.0286961	0.365371	0.151978
Lsm4	-0.0694726	-0.0481894	0.0675995	0.0287761	0.112283	0.102749
Dap3	-0.0586087	-0.0889086	0.0795698	0.0287834	0.0084207	0.0388249
Lep	0.954015	-0.103575	0.0217447	0.0288127	0.775455	0.96457
Letmd1	-0.141505	-0.0609829	0.0545402	0.0288928	0.285932	0.465943
Fign	0.29082	0.0402415	0.148439	0.0289291	0.71724	0.344195
Actr6	0.0936246	-0.0362452	0.0487816	0.0289461	0.332609	0.335245
S100pbp	-0.124859	-0.0601417	0.115798	0.0289472	0.239705	0.116294
5930403L14Rik	0.281438	0.0735901	0.0145246	0.0289492	0.501397	0.920031
H2-Q1	0.41845	0.379215	-0.411421	0.0290328	0.0539685	0.100713
Galc	-0.119408	-0.122572	0.169719	0.0290476	0.0362355	0.0336133
Col4a4	0.2739	0.258512	-0.149897	0.0290609	0.0476048	0.314307
Arl10	0.191432	0.0908273	-0.194645	0.0291881	0.246845	0.0926589
Dr1	0.0935358	0.0911731	-0.101048	0.0291925	0.043135	0.0786511
Pkm	-0.148826	0.0307474	-0.000335855	0.0292129	0.592885	0.996505
Zfp346	-0.102879	-0.0053067	-0.0109341	0.0292325	0.892278	0.83694
Snhg11	0.411934	-0.509048	0.387897	0.0292747	0.0190111	0.112936
Mtmr14	-0.0819902	-0.0669111	0.209303	0.0293113	0.074075	0.00345822
Tmem128	0.0667213	-0.0646825	0.0200474	0.0293494	0.0441159	0.567188
Sh3pxd2b	0.33593	0.157569	-0.253131	0.0293662	0.252287	0.185376
Ciart	-0.510266	-0.447056	0.3597	0.0294134	0.0604576	0.210669
Sft2d2	0.102262	0.0289707	0.0103583	0.0295216	0.470569	0.844896
Chrna1	-0.807842	0.146795	0.1489	0.0295343	0.638049	0.723143
Pnpo	0.0892149	-0.109104	0.102825	0.0295784	0.0199741	0.0661359
Itpripl1	-0.151613	-0.0603472	0.280832	0.0295934	0.323268	0.0130916
Ube2s	0.142788	0.0153685	-0.141825	0.0296314	0.779056	0.0996114
Klhl25	0.392961	-0.0452156	-0.189251	0.0296649	0.764449	0.372899
Nme1	-0.072139	-0.0522101	0.0802476	0.0296957	0.103274	0.0734657
Acyp1	0.127252	-0.0349179	-0.0269668	0.029718	0.484683	0.684956
Kdsr	0.142379	-0.0390812	-0.0348535	0.0297206	0.484561	0.640308
Msl3	0.0359005	-0.00849861	0.0368727	0.0297402	0.544036	0.0915246
Mettl23	0.0813703	0.0144005	-0.0917554	0.0297526	0.647321	0.07079
Atp6v1e1	0.0580806	-0.0754618	0.0126741	0.0297896	0.0160632	0.676485
Gm4980	-0.271169	0.281521	-0.0620904	0.0298382	0.0358089	0.661953
Edem1	0.17304	0.0751925	-0.0330876	0.029855	0.286443	0.714219
Chrnb4	0.759503	0.751331	-0.377176	0.029857	0.0419996	0.360241
Wwtr1	0.106749	-0.0687514	0.0160429	0.0298706	0.137355	0.772912
Lamb2	0.151661	-0.00050333	-0.00253102	0.029897	0.993086	0.974329
Mrpl16	-0.0615785	-0.0716628	0.105941	0.0298986	0.024176	0.0175365
Zfp385b	-0.595645	-0.116414	0.293605	0.0299066	0.614783	0.36373
Ppm1f	0.0458564	-0.0433869	0.0516322	0.0299135	0.048496	0.0714086
Acss1	-0.142419	-0.113979	0.144772	0.0299222	0.0795454	0.0944886
Car8	-0.166146	-0.120824	-0.0046524	0.029944	0.102651	0.956964
Gmfb	0.0720425	0.0501359	-0.00980626	0.0299752	0.114659	0.793852
Tnks2	0.0776736	0.0659839	-0.0554798	0.0300101	0.0673402	0.207831
Gm11423	0.241528	-0.0482126	-0.0243314	0.0300264	0.607863	0.846472
Shc4	0.314778	0.324952	-0.479889	0.0300449	0.0367349	0.02731
Fxyd7	-0.375348	-0.155894	0.362037	0.030091	0.306876	0.108527
Lta4h	0.11903	0.0753963	-0.0826683	0.0300948	0.143306	0.219059
Wnt11	0.269752	0.24319	-0.111669	0.0301095	0.0566203	0.440643
Cdip1	0.0542907	-0.158721	-0.00334163	0.0301148	0.000491394	0.90579
Higd1a	-0.0892715	-0.0731972	0.0841172	0.0301382	0.0747768	0.115107
Top1mt	0.101798	-0.0527866	-0.0087222	0.0301555	0.215028	0.869283
Dyrk1b	-0.0692307	-0.0442261	0.0962934	0.0301816	0.140867	0.0375032
Rpap3	0.105815	0.0181266	-0.129745	0.0302145	0.659063	0.0560286
Ide	-0.0677767	0.00383364	0.0711038	0.0302326	0.883105	0.0875978
P3h1	0.192101	0.0598003	-0.0794785	0.0302454	0.433459	0.441446
Stab2	-1.09067	0.760031	-0.378166	0.0302885	0.115133	0.515139
Esrrb	-0.254919	-0.0632029	-0.129967	0.0303224	0.528141	0.350667
Kxd1	0.0680226	-0.055009	-0.0118293	0.0303587	0.078186	0.739993
Dpagt1	0.0645461	-0.0548642	0.030332	0.0304316	0.0680187	0.386915
Bag2	-0.126463	-0.114576	0.051426	0.0304538	0.056338	0.449683
Hdac1	0.0785945	0.00529572	-0.00400411	0.0304589	0.861322	0.922201
Mettl6	0.096277	-0.0712653	-0.0268422	0.0305043	0.0994596	0.598552
Prob1	-0.339883	0.0756032	-0.0561142	0.0305577	0.57066	0.753024
Begain	0.506945	0.321502	-0.319636	0.0306035	0.144479	0.26026
l7Rn6	-0.0885909	-0.0277222	0.0035724	0.0306424	0.432847	0.93848
Arc	0.853225	0.1862	-0.626564	0.0306526	0.578059	0.199598
Sod2	-0.0693111	-0.04411	0.0598048	0.0307609	0.143841	0.143414
Cwc25	0.120475	-0.022047	-0.104875	0.0307864	0.639685	0.140672
Eya3	0.0614433	0.0457118	-0.0699387	0.0308118	0.0989116	0.0709459
Cdc73	0.0605684	-0.0293145	0.010784	0.0308169	0.245148	0.7352
Tiparp	0.228659	-0.0335257	0.0360303	0.0308325	0.70655	0.764422
Lsr	0.598755	0.415638	-0.715267	0.0308479	0.117732	0.0616982
Pcca	-0.0943824	-0.0787555	0.086198	0.0308531	0.0725469	0.126121
Rbck1	-0.063389	-0.0284615	0.0875537	0.0309917	0.277132	0.0393652
Pdcl3	0.0768497	0.0253974	-0.120583	0.0310279	0.410778	0.0255024
Cyb561	0.199732	0.0995319	-0.0555078	0.0311485	0.234555	0.601839
Rgs6	0.247352	-0.190071	-0.187081	0.031157	0.0916686	0.190334
4930520O04Rik	-0.522025	-0.572039	1.12667	0.0311669	0.0311314	0.00756166
Eef2kmt	0.0600408	-0.100915	0.0242638	0.031177	0.00607851	0.455244
Slc11a2	-0.118646	-0.0251037	0.132483	0.0311902	0.591153	0.0756696
Dock5	0.076741	0.0261985	-0.0129011	0.0311939	0.397289	0.750152
A830018L16Rik	0.290389	-0.0231838	0.0263309	0.0312666	0.83735	0.863194
Txn1	0.148608	-0.00926275	0.0567298	0.0313363	0.872638	0.479833
Pi4kb	0.0752877	-0.0299951	-0.0169605	0.0313475	0.33017	0.671357
Msra	-0.091398	-0.0590058	0.110566	0.0313774	0.141112	0.0603153
Capn12	0.332415	-0.0129989	-0.129405	0.0314961	0.91994	0.472278
Edil3	0.781113	0.344966	-0.383957	0.0315002	0.286194	0.371589
Zmynd19	0.108016	0.108619	-0.142501	0.0315327	0.0419322	0.046397
Flnc	-0.504557	0.0366027	-0.0920242	0.0315577	0.852363	0.730853
AI661453	0.353689	0.139728	-0.254674	0.0315651	0.334746	0.210397
Adamts12	0.319538	-0.07251	0.0788793	0.0315884	0.566825	0.643352
Taf2	0.0442568	-0.0202384	-0.00885394	0.031608	0.271821	0.706424
Pign	0.104966	0.0785807	-0.088981	0.0316341	0.0992795	0.151837
Mogat2	0.748071	0.412929	-0.359398	0.0317171	0.196712	0.382513
Gin1	-0.184282	-0.116564	0.318483	0.0317697	0.148876	0.0184168
Yif1a	0.0571486	-0.108637	0.0639046	0.0317952	0.00369632	0.0765622
Ccbl2	-0.182448	-0.150443	0.234104	0.0318247	0.076953	0.051053
Susd1	0.351496	0.381145	-0.473808	0.0318948	0.0330187	0.0437811
Tab3	0.166091	0.0994274	-0.100795	0.0319155	0.167955	0.281533
Hist1h2ai	0.184153	0.104876	-0.123848	0.0319606	0.185949	0.238927
Cenpb	-0.0589152	-0.0843054	0.12502	0.0320173	0.0120148	0.00836477
Sez6l	0.468928	-0.0385412	-0.067755	0.0321149	0.83393	0.785793
Aaed1	-0.08306	-0.103609	0.100576	0.0321506	0.0203057	0.0614326
Spint1	1.00236	0.445317	-0.666457	0.0321787	0.286318	0.244393
Cks1b	0.257101	0.176877	-0.379672	0.0322099	0.123998	0.0326945
Snx10	-0.117782	0.0073629	0.217677	0.0322594	0.873339	0.0145464
Chp1	0.120078	-0.0783321	0.153615	0.0322657	0.140407	0.0521769
Itgav	0.0730808	-0.0132751	0.0828194	0.0323395	0.646755	0.0747822
Pdxdc1	0.057838	-0.0411083	0.0611084	0.0323923	0.115094	0.09071
Stk39	0.232499	-0.0455445	0.0168921	0.0324096	0.622014	0.891265
Cmtm8	0.512982	0.111812	-0.421893	0.0324147	0.584483	0.164487
Acp1	0.0599057	0.0015519	0.0148975	0.0324895	0.947376	0.643634
Myl6b	-0.225317	-0.0994434	0.146945	0.0324916	0.290355	0.253505
BC029214	0.1568	0.123768	-0.180864	0.0324928	0.0881813	0.0714079
Fech	-0.0332856	-0.0343912	0.0713587	0.032518	0.0395326	0.00817484
Vgll2	-0.625045	-0.0426825	-0.263974	0.0326088	0.862219	0.442058
Rrn3	0.06375	-0.0446167	0.0194029	0.0327018	0.120292	0.57413
Adal	-0.107189	0.00700098	-0.0589429	0.032703	0.868254	0.32721
Dym	-0.107161	-0.0134042	0.102869	0.03275	0.751782	0.116715
Braf	0.0542778	0.0587965	0.00924238	0.0327601	0.0340251	0.750523
Dusp26	-0.618953	0.123655	0.0291658	0.0327637	0.616397	0.929535
St3gal4	0.200913	-0.101163	0.0482697	0.0327703	0.236377	0.655471
Slc30a2	-0.36813	0.111951	-0.0503191	0.0328132	0.453656	0.798258
Dusp27	-0.422834	0.219867	-0.378148	0.0328258	0.223693	0.138086
Rhot1	0.0551747	-0.025577	0.0660343	0.03288	0.270963	0.0648346
Sec22a	0.0528077	-0.106526	0.126999	0.0328869	0.00298248	0.00515068
Ptprf	0.477764	0.364549	-0.664778	0.032901	0.0973667	0.0406936
Nutf2	-0.216856	-0.000925833	0.0437202	0.0329521	0.991355	0.707665
Eif4a2	0.0874555	-0.00521416	-0.0719199	0.0329711	0.879903	0.166251
Pdgfrb	0.105487	-0.177692	0.214361	0.0330216	0.00645979	0.0103208
Rnf182	0.284973	0.0575941	0.0606959	0.0330459	0.613287	0.692483
Brd2	0.125642	0.0429418	-0.0996685	0.033057	0.404226	0.179258
Ldhb	-0.0631999	-0.11242	0.0758078	0.03307	0.00515392	0.064734
Pmpca	-0.0651951	-0.0379784	0.0879118	0.0331495	0.181618	0.0453492
Rab42	0.382133	0.588819	-0.41427	0.033153	0.00933443	0.0862316
Desi1	0.13937	0.141452	-0.0729094	0.0332135	0.0427534	0.351067
Cercam	0.29691	0.0798605	-0.291765	0.0332314	0.506268	0.111376
Col15a1	0.339802	-0.0427435	-0.0132073	0.0332359	0.751479	0.94209
Pcsk6	-0.169787	-0.149151	0.150667	0.0332563	0.0666648	0.14176
P3h4	0.128437	-0.136262	0.100247	0.0333364	0.0371138	0.186052
Mtfmt	0.0619169	-0.0118917	-0.0270226	0.0333789	0.631569	0.430894
Sybu	0.271768	-0.143995	0.0385318	0.0334104	0.218336	0.79204
Prr36	-0.23372	-0.233275	0.159053	0.0334113	0.0453655	0.239429
Cox11	-0.0416753	-0.0483984	0.0810192	0.0334366	0.0273454	0.0124638
Mocs1	-0.0754227	-0.0820689	0.175311	0.033454	0.0342206	0.0060676
Gm5617	0.0502274	-0.14761	0.173683	0.0334796	0.000554479	0.00106191
Gulp1	0.245083	-0.00620316	0.133438	0.0335113	0.94905	0.334702
Csrnp1	0.243072	-0.0328546	-0.215222	0.03354	0.734529	0.143268
Tacc1	0.113616	0.00806606	0.0590217	0.033563	0.858029	0.3555
Lrp12	0.149113	-0.0716914	0.203626	0.0336886	0.258688	0.0442235
Tob1	0.306519	-0.135426	0.0768301	0.0337287	0.294631	0.644653
Ttc30b	-0.145455	-0.013608	0.153016	0.0337288	0.81414	0.094682
Mxra8	0.230412	0.146319	-0.293297	0.0337395	0.153417	0.055167
Ccdc17	0.128848	0.0337389	0.0324128	0.0337593	0.518946	0.643572
Zfp691	-0.125635	-0.0177361	-0.0396218	0.0337689	0.723881	0.564411
Dlx5	0.456264	0.199914	-0.486068	0.0337767	0.298394	0.091694
Kcmf1	-0.0975178	0.0204969	0.0519522	0.0338138	0.60197	0.345402
Ntng1	0.399238	-0.0131397	-0.00431748	0.0338454	0.933982	0.983956
Slc12a4	0.199708	0.0282102	-0.0780145	0.0338882	0.723994	0.479825
Cul7	0.147072	-0.0791608	0.0936325	0.0339303	0.213971	0.268896
Chkb	-0.114717	-0.20043	0.265178	0.0339383	0.00573868	0.00631913
Cox7c	-0.088046	-0.096038	0.0950183	0.0339637	0.0344567	0.08898
Hpx	-0.53707	-0.432195	0.856326	0.0340381	0.0868675	0.0265302
Atf6	0.0602727	-0.0119889	0.0356397	0.0340851	0.621872	0.300981
Surf4	0.0786525	-0.00301205	-0.0366645	0.0340866	0.923385	0.405001
Itgb4	0.290692	0.292065	-0.213846	0.0341876	0.0453916	0.211204
Zwilch	0.302071	0.249551	-0.230898	0.0341928	0.0811754	0.196593
Ppp2r3c	0.096394	-0.00917221	-0.00838573	0.0341992	0.811798	0.872059
Nexn	-0.451947	0.199915	-0.35047	0.0342449	0.296056	0.191383
Fez2	-0.07249	-0.0320527	0.0394506	0.0342971	0.296421	0.337902
Igfbp6	0.283911	0.193292	-0.411059	0.0343331	0.132803	0.0372195
Twsg1	0.107592	0.0377911	-0.0496717	0.0343385	0.397207	0.410169
Usp2	-0.262598	-0.157251	0.347765	0.0343865	0.175601	0.0496783
Ccdc18	-0.306488	-0.168081	0.348313	0.0344026	0.208312	0.0780849
Ankrd33b	-0.337209	0.189398	-0.27012	0.0344352	0.199305	0.180101
Chd1l	-0.0466362	-0.00650822	0.0514199	0.0344574	0.728424	0.0849645
Cml3	0.617559	0.43851	-0.503078	0.034489	0.120659	0.174248
Grsf1	-0.0614122	-0.0515274	0.0694705	0.0345579	0.0784519	0.0793884
Slc38a3	-0.470539	0.106906	-0.21188	0.0345663	0.576244	0.42186
Adcy2	-0.519206	0.211807	-0.300086	0.0345976	0.332538	0.312776
Lrrn2	0.347224	0.0916426	-0.159391	0.0346077	0.51873	0.41366
Thoc6	-0.100346	-0.0090774	-0.00292943	0.0346134	0.82149	0.957001
Acot12	-0.702807	-0.0932322	0.261423	0.0346406	0.741584	0.502679
Mast2	-0.0812547	-0.00782105	0.0642537	0.034642	0.810385	0.185441
Tfb1m	-0.0716648	-0.0307128	0.0157506	0.0346616	0.311287	0.687497
Pcdhga10	-0.313665	-0.301856	0.55555	0.0346647	0.0526308	0.0184994
Rap2c	0.0644013	0.0545883	-0.0523924	0.0346886	0.0764962	0.175336
Chp2	0.299144	0.249254	-0.269241	0.0347031	0.0802538	0.141271
Numbl	0.185517	0.0577229	-0.10239	0.0347346	0.451089	0.333403
Nup88	0.0748347	0.0445666	-0.0534115	0.0348128	0.178887	0.225189
Zkscan14	-0.107852	-0.00730794	0.0716055	0.0348309	0.86588	0.254628
Sfrp5	0.378305	0.42034	-0.621449	0.0348405	0.0332105	0.0244622
Pla1a	0.236851	-0.012116	-0.0664148	0.0348579	0.898495	0.610317
Gfra4	0.157031	-0.212077	-0.137345	0.0348765	0.016529	0.151024
Rmdn3	-0.172784	0.0225268	0.064785	0.034965	0.746497	0.500561
Hipk1	-0.118284	-0.0611524	0.212587	0.0349829	0.233528	0.0176975
Nceh1	-0.272807	-0.0829177	-0.0807475	0.0349966	0.461976	0.591631
Sel1l	0.0512163	0.0347301	0.0207741	0.0349992	0.135801	0.468098
Prdm5	0.546066	0.220274	-0.311647	0.0350434	0.33913	0.31993
Bre	0.0497048	0.0311925	-0.0309377	0.0350685	0.161279	0.282609
Prrt4	0.270642	0.0634968	-0.203088	0.0350952	0.56598	0.206554
Mospd1	0.0835273	0.00146589	0.0308223	0.0351112	0.965141	0.507556
Ppp1r1b	0.335564	-0.0386248	-0.166643	0.0351119	0.775339	0.381169
Klhdc7a	0.214087	0.130549	-0.00773323	0.03518	0.171572	0.94707
Fancb	0.257137	0.0640502	-0.152437	0.0352311	0.543602	0.304123
P2rx4	0.173514	0.0733102	-0.110415	0.0352625	0.319704	0.273926
Slc9a5	0.218296	0.0847915	-0.193266	0.0353532	0.356867	0.148359
Plbd2	-0.0575108	-0.0603797	0.0815854	0.0353896	0.0407221	0.0409976
Slc35b2	0.137225	0.0160625	-0.100109	0.0354385	0.772281	0.218637
Wdsub1	-0.11757	-0.143629	0.228661	0.0355098	0.0243548	0.0133364
Nkain2	0.549346	0.485009	-0.466783	0.0355117	0.0695116	0.162565
Mmp3	0.875636	0.691303	-0.689321	0.035538	0.0945632	0.189897
Abce1	0.0520424	0.0404413	-0.0128303	0.0355627	0.0985935	0.654978
Gtf2a2	0.0679787	-0.0201553	-0.00852173	0.0356148	0.474603	0.818909
Mrpl12	-0.0404724	-0.0748453	0.0676677	0.0356916	0.00481285	0.0235667
Trpc6	0.285792	-0.0456853	-0.0834126	0.0357276	0.694508	0.598843
Camkmt	-0.0701225	-0.179648	0.108404	0.0357343	0.00114369	0.0310612
4632427E13Rik	-0.29042	-0.288014	0.379363	0.0357432	0.0493205	0.0537211
Nxnl1	-0.222291	-0.178989	0.22485	0.0358605	0.090413	0.10965
Glce	0.111965	0.00183453	0.101598	0.0358613	0.967658	0.141792
Hlcs	0.122941	0.20507	-0.232588	0.0359606	0.0074659	0.0150444
Edn1	0.301811	0.334221	-0.286195	0.0359706	0.0346877	0.128439
Tceal7	-0.363725	-0.0936621	-0.489155	0.0359732	0.533068	0.0493802
Tax1bp3	0.114591	-0.0196658	-0.0655177	0.0359956	0.674345	0.322627
Tm9sf3	0.0466333	-0.00610928	0.0292311	0.0361289	0.747693	0.283402
Plekha4	0.305741	0.283025	-0.351867	0.0361558	0.0614886	0.0785731
Armc8	-0.0581065	0.0158665	0.00499956	0.0361798	0.510397	0.875529
Ctnnal1	0.18343	0.097787	-0.164137	0.0362368	0.225467	0.147296
Elavl3	-0.424582	-0.492296	0.584421	0.0362838	0.0299237	0.0462687
Fam151b	-0.114164	-0.129814	0.20207	0.0363062	0.032015	0.0195163
Ywhaq	0.0681927	-0.00562763	0.00818347	0.0363364	0.839153	0.827495
Myf6	-0.692913	0.0841008	-0.0718802	0.0363814	0.765974	0.850543
Ppp1r2-ps3	0.137431	0.0194707	-0.24484	0.0364287	0.728815	0.0191251
Inpp1	-0.131109	-0.0869455	0.129935	0.0364411	0.146721	0.116678
Rab5a	0.0388358	0.0105072	0.0383638	0.036459	0.515037	0.11764
Kctd3	0.119671	-0.00620731	0.00427225	0.0364855	0.898472	0.948254
Agpat1	-0.032951	-0.0659506	0.0533603	0.0365572	0.00353816	0.0270752
Mrpl38	-0.0820968	-0.0533406	0.0661179	0.0365584	0.153766	0.184639
Mcpt4	0.589787	0.386081	-0.822643	0.0366103	0.151424	0.0447391
Itga3	0.164159	0.0465071	-0.0749363	0.0366315	0.496934	0.423456
Tars2	-0.0513516	-0.00407071	0.0373589	0.0366794	0.845817	0.223798
Sod3	-0.101792	-0.116834	0.111848	0.0367672	0.0314121	0.0903387
Impg2	-0.399224	-0.0675319	0.248659	0.0367726	0.680573	0.288383
Sec24d	0.25305	0.0971849	-0.161041	0.0367816	0.367054	0.279242
Kng2	-0.127609	0.0104286	-0.0790349	0.0367962	0.84128	0.290882
Ttc19	-0.055065	-0.0634842	0.0826273	0.0368084	0.0309721	0.0354113
Id4	0.346435	0.0901564	-0.10326	0.0368416	0.531734	0.594639
Mrpl36	-0.0259611	-0.0516441	0.0457678	0.0368488	0.00367035	0.0201327
Cetn3	0.0693891	-0.0340821	0.024462	0.0369054	0.261121	0.531754
Arl4a	0.188081	-0.204006	0.0910534	0.036935	0.0381641	0.398964
Clic5	0.0584442	-0.059169	0.0439903	0.0369916	0.0477448	0.211459
Impact	0.206964	0.00328461	-0.182341	0.0370135	0.968969	0.154518
B3galt2	0.631771	0.144344	-0.160382	0.0370407	0.581782	0.649556
Ptgr2	0.0648742	-0.055954	0.0319469	0.0372048	0.0772644	0.392465
Tmem184a	0.542988	0.108591	0.105164	0.0372183	0.628914	0.72801
Heph	0.512216	-0.0361233	-0.0351191	0.0372285	0.863199	0.901463
Ppapdc1b	0.154708	-0.0267111	-0.0588001	0.0372296	0.675581	0.502695
Tll1	0.364279	0.137544	-0.143141	0.0373013	0.376378	0.489279
1600012H06Rik	0.0859059	0.0321817	0.004858	0.0373188	0.379898	0.918699
Dnajb14	0.07276	0.0358906	0.0312022	0.0374255	0.261101	0.453051
Sirt4	-0.0750231	-0.120667	0.135955	0.0374712	0.00909929	0.0185292
Slc2a12	-0.135945	-0.0246261	0.035324	0.0374754	0.661516	0.643192
Cyp1a1	-0.673336	-0.12051	0.614784	0.0374776	0.665255	0.144053
P2rx5	0.122717	-0.0112182	-0.0432861	0.0375138	0.823853	0.53347
Tatdn3	0.0986275	-0.084838	0.0557587	0.0375761	0.078496	0.333199
Aars2	-0.0938228	-0.046363	0.0324686	0.0376268	0.261032	0.541278
Eif2s1	0.0658852	0.0310185	-0.013871	0.0376759	0.281613	0.706746
Kcnq1ot1	-0.122148	-0.0558433	0.180123	0.037829	0.294695	0.0385631
Syn2	0.346046	0.0914179	0.0946798	0.03784	0.528994	0.627118
Mgat2	0.140492	0.0639471	-0.0940104	0.0378575	0.29669	0.261765
Pvr	0.137679	-0.00189577	-0.163562	0.0378678	0.973259	0.0747535
Mfsd9	0.159529	0.0702731	-0.0725831	0.0378804	0.310918	0.429249
Kitl	0.0854661	-0.075457	0.117206	0.0379431	0.0735722	0.0488447
Cthrc1	0.691273	0.523787	-1.13392	0.0379522	0.11044	0.0269269
Cpq	0.113069	0.000909568	-0.0482576	0.0380178	0.984394	0.457093
Tnc	0.773773	0.545552	-0.737729	0.0380188	0.131455	0.131849
Gspt1	0.0494546	-0.00444279	0.0393807	0.0380238	0.827523	0.193192
Ilkap	-0.0819863	-0.0887008	0.0995319	0.0380258	0.0396149	0.0705465
Dnmt3b	0.200879	0.196719	-0.206761	0.0380803	0.0543982	0.109832
Slc2a4rg-ps	-0.270573	-0.107361	0.102938	0.0381074	0.357413	0.505156
Fastkd3	-0.0879718	-0.158384	0.216233	0.0381179	0.00585455	0.00565562
Sorl1	-0.240028	0.244669	-0.0971143	0.0381298	0.0480957	0.47992
Il34	0.159624	0.0121152	0.118001	0.0381847	0.85403	0.222271
Fgf10	0.685159	0.218661	-0.354033	0.0381884	0.452406	0.374822
AY074887	0.458718	0.58268	-0.602012	0.038316	0.0229882	0.0564524
Disp1	-0.142675	-0.121779	0.209043	0.0383304	0.081537	0.0399052
Hebp1	0.174038	0.0108162	-0.139021	0.0383884	0.880373	0.193103
Bspry	0.372571	0.213955	-0.385175	0.0384155	0.203346	0.109354
Ptprs	0.211313	0.139939	-0.200177	0.0384325	0.152444	0.134835
Aldh1a3	0.460256	0.0762737	-0.38971	0.0384474	0.69051	0.172112
Abra	-0.583607	0.161718	-0.432298	0.0384937	0.512013	0.222439
Lipa	-0.0935372	-0.0160643	0.0158156	0.0385404	0.680283	0.763473
Igfals	0.495302	-0.219832	0.324685	0.0385664	0.310011	0.272764
Msmp	0.120391	0.00541757	0.0130022	0.0385743	0.913302	0.84718
Tm9sf4	0.0361655	-0.0676029	0.0937784	0.038598	0.00508141	0.0045862
Sema6a	0.221631	-0.105705	0.1253	0.0386639	0.279436	0.336979
Cadm4	0.141009	-0.0201374	-0.120909	0.0386902	0.731431	0.168359
Efemp1	0.244273	0.0419364	-0.13698	0.038691	0.680745	0.34064
Nthl1	0.115842	0.0305479	-0.075953	0.0387433	0.532519	0.273264
Cebpg	-0.0569867	-0.0107872	0.0298257	0.0387724	0.65091	0.371217
Isoc1	0.0979015	-0.0617936	0.0887084	0.0388081	0.169843	0.149968
BC021614	-0.471851	0.149474	0.212745	0.0388325	0.457712	0.436403
Rai2	0.202485	-0.00125921	-0.0537215	0.0388743	0.988016	0.640023
B4gat1	0.0647411	-0.0473061	0.040678	0.0388872	0.122825	0.291885
Ngly1	-0.0855749	-0.0480446	0.0916912	0.0388895	0.21349	0.100848
Hoxb8	0.266654	0.0678677	-0.0972232	0.0389168	0.546854	0.524793
Mto1	-0.151606	-0.0416013	0.14276	0.0389685	0.517438	0.138011
Coq3	-0.0862623	-0.0554681	0.134812	0.0389956	0.163894	0.0327466
Tmem119	0.342199	0.154056	-0.291147	0.0389958	0.305306	0.171932
Cyp2a4	-0.938179	-0.677998	1.05869	0.0390419	0.126444	0.0883172
Enpp2	0.195796	0.0787233	-0.089439	0.0390858	0.354993	0.431635
Samd10	0.263883	0.201801	-0.243584	0.0391386	0.110472	0.144767
Gm17757	0.644534	0.665223	-0.744456	0.0391906	0.0474767	0.0831886
Lrrc14b	-0.316614	0.267791	-0.276993	0.0391942	0.0851485	0.162766
Cbs	-0.580583	-0.639449	0.407112	0.0392036	0.0385118	0.24678
Zfp712	-0.20654	-0.0695126	0.254139	0.039208	0.433078	0.0697087
Fstl1	0.161978	0.0285839	-0.117442	0.0392442	0.673812	0.233321
Ubl3	-0.0473634	-0.0139515	0.0704765	0.0392779	0.489592	0.0388671
Eya2	0.6041	0.469984	-0.735419	0.0392903	0.10614	0.0720033
Fkbp1b	0.44331	0.699839	-0.780348	0.0393298	0.0103954	0.0217548
Fzd8	0.136803	0.059269	0.0607804	0.0393579	0.323205	0.444464
Tfg	0.0839627	-0.0028417	-0.0614776	0.0394412	0.935158	0.229995
Abca7	-0.156139	-0.0240764	0.160664	0.0395509	0.713044	0.113089
Alg12	-0.0530957	-0.096983	0.113671	0.0395608	0.00577823	0.0104045
G6pdx	-0.156264	-0.0127738	0.0688099	0.039676	0.84476	0.449322
Gars	-0.0972538	-0.0566403	0.127149	0.0397327	0.2019	0.0590384
Mrps16	0.0577023	-0.069158	0.0127354	0.0397479	0.0293577	0.698117
Nudcd2	0.109811	-0.000804736	-0.0236549	0.0397606	0.985975	0.704935
Klhl11	0.157029	-0.083982	-0.0535076	0.0397789	0.235488	0.553746
Qpctl	-0.0761644	-0.105362	0.182885	0.0397951	0.0175371	0.0065825
Gng12	0.0398384	0.0513361	-0.0276521	0.0398083	0.0227631	0.252896
Tmx3	0.114745	0.0944239	-0.106892	0.0398505	0.0928764	0.143591
Pycrl	-0.0481227	-0.114104	0.0503419	0.0399127	0.00188733	0.109307
Cd302	0.104899	0.00616934	0.0217436	0.0399351	0.888078	0.715786
Mkks	-0.0574714	-0.100282	0.0674413	0.0399584	0.0070736	0.0809569
Mmp17	0.245779	0.190835	-0.183362	0.0400219	0.108187	0.224308
D10Jhu81e	-0.0807924	-0.101795	0.0719061	0.0400362	0.0248263	0.159122
Bdh1	-0.653573	0.273982	0.0555194	0.0400374	0.339895	0.880771
Ogt	0.112632	0.0341617	-0.0652831	0.0401214	0.480163	0.331011
5430402O13Rik	-0.248319	-0.370084	0.727673	0.0401798	0.013361	0.00285226
Hspa2	0.13863	-0.246563	-0.0013713	0.04018	0.00658323	0.986063
Pkp2	0.249407	0.0601325	-0.0885493	0.0402514	0.571257	0.539293
Nos2	0.159828	-0.136386	0.0487503	0.0402639	0.0849998	0.59603
Zfp830	0.163042	-0.00575196	-0.107031	0.0402924	0.932857	0.27781
Stard6	0.283422	0.384337	-0.289783	0.0402926	0.019153	0.116471
Mocos	0.159362	0.0578543	-0.0769457	0.0403046	0.40388	0.411679
C230072F16Rik	-0.257243	-0.330736	0.554154	0.0403275	0.0232786	0.0103905
BC029722	-0.118479	-0.0139353	0.00144481	0.0403381	0.779702	0.98284
Ilk	0.09376	0.00964318	-0.00808852	0.0403656	0.806628	0.879235
Prkcdbp	0.182286	0.0166158	-0.104175	0.0404012	0.828184	0.338119
Cpxm1	0.547247	0.408807	-0.510474	0.0404205	0.119834	0.144561
Slc4a2	-0.115351	-0.0565633	0.0333155	0.0404259	0.27344	0.615569
Bet1	-0.0365608	-0.0145468	0.0430265	0.0404406	0.364163	0.0811355
Slc38a6	0.137927	-0.117859	0.147164	0.0404476	0.0850045	0.105094
Hr	0.147649	0.189715	-0.357757	0.0404519	0.023409	0.00647313
Jup	0.0681117	-0.117804	0.053215	0.0404619	0.00745054	0.207575
Lrrc16b	-0.307168	-0.279679	0.25624	0.0405981	0.0714706	0.183411
Csdc2	0.657225	-0.189099	0.161943	0.0406083	0.503388	0.667636
Ppih	0.155069	0.190756	-0.24799	0.0406978	0.027498	0.0316518
Tfap4	-0.244008	0.198982	0.213598	0.0407905	0.0969008	0.166779
Thap4	-0.0621118	0.00751858	0.00851462	0.0408076	0.774277	0.810188
Ift57	0.0929634	0.0253749	-0.0897577	0.0408608	0.525321	0.134728
Chadl	-0.07949	-0.149385	0.163659	0.0409008	0.00535259	0.0126252
Mcat	-0.100364	-0.104693	0.177788	0.0409245	0.047869	0.0222203
Als2cr12	0.335275	0.0693341	-0.0338051	0.0409628	0.627468	0.859739
Gabra2	0.313524	0.0438183	-0.407649	0.0410009	0.741284	0.0617632
Agbl3	0.119046	-0.197639	0.158712	0.0410051	0.00894533	0.0573062
Fig4	0.0612931	0.0285724	0.0130468	0.041054	0.297053	0.710902
Dennd6b	-0.144391	-0.119861	0.0562456	0.0410962	0.0930493	0.504922
Nop16	0.124157	0.0509652	-0.157391	0.0411191	0.352701	0.0667078
Pmepa1	0.453206	0.134471	-0.295691	0.0411469	0.492461	0.28316
Ccdc149	0.118893	-0.0156859	-0.02717	0.0411841	0.755467	0.691295
Msi1	0.381971	0.41291	-0.537063	0.0412646	0.0430761	0.0489438
Elovl3	-0.649524	-0.0393054	0.442695	0.0412902	0.88603	0.26515
Myod1	-0.713272	0.0668147	-0.251684	0.0413129	0.824712	0.544786
Rragd	-0.319487	0.121544	-0.273015	0.0413333	0.386791	0.176705
Agtrap	0.130047	-0.00528811	-0.0978958	0.041341	0.923255	0.224692
Gfm1	-0.0610843	-0.0602681	0.0805296	0.0413886	0.0574501	0.0597826
Taf1	0.113139	0.0351661	-0.0163316	0.0414011	0.473966	0.801263
Atp6v0a2	-0.075015	-0.047138	0.0886674	0.0414251	0.17851	0.081812
Olfml1	0.457427	0.208978	-0.306266	0.0414282	0.306963	0.273073
Wdfy1	0.0858859	0.0139626	-0.0211669	0.0414311	0.702433	0.669458
Necap1	0.0909803	-0.0124826	0.000541333	0.0414543	0.746625	0.991697
Ankrd49	0.0784953	0.0599202	0.0236798	0.0414661	0.115897	0.603137
Map2k6	0.193647	0.00656696	-0.181799	0.0414886	0.936027	0.14507
Bves	-0.519512	0.314807	-0.362461	0.0415388	0.192106	0.256167
Ywhae	0.0285971	-0.0110754	0.0106599	0.0415608	0.379696	0.523998
Fxyd6	-0.357068	0.105859	-0.11479	0.0416003	0.494184	0.580659
Rnf34	0.102162	0.0392344	-0.108127	0.0416994	0.383843	0.109791
Rraga	0.0470604	0.00394581	-0.0217635	0.0417039	0.843215	0.434882
Mansc1	0.456941	0.202472	-0.314327	0.0417233	0.321194	0.262628
Tnfrsf1a	0.100979	-0.0620188	0.023165	0.0417555	0.187719	0.691411
Sh3bgrl2	0.0848615	0.0241534	0.00939757	0.0418549	0.511544	0.847169
Cks2	0.576471	0.477871	-0.407498	0.0418779	0.0948246	0.251789
Unc45a	0.0622014	-0.0706589	-0.00794066	0.0420603	0.0373407	0.824547
Eng	-0.149593	-0.186778	0.280969	0.0421157	0.0270843	0.0185212
Lamp1	-0.0570727	-0.0217119	0.0469645	0.0421678	0.389501	0.192741
Cnih1	0.0636393	-0.0327128	0.065441	0.042195	0.259186	0.118888
Gm19557	-0.386888	0.111939	0.118824	0.0422099	0.505962	0.598741
Tmem170b	0.0744244	-0.0601556	0.031914	0.0422312	0.101908	0.468679
Ergic1	0.0719047	0.0129089	-0.0698823	0.0422483	0.67545	0.135884
Mut	-0.104734	-0.132682	0.18335	0.0422643	0.025831	0.0240264
Ndrg2	-0.0855335	-0.0376698	-0.00444332	0.0422749	0.325622	0.928069
Sec62	0.0612377	-0.0144906	0.0192138	0.0423076	0.58379	0.591369
4931440P22Rik	-0.200726	-0.181229	0.268972	0.0423463	0.0759307	0.0581481
Nfs1	-0.0439544	-0.0550074	0.101007	0.0423585	0.027033	0.00852147
Spg11	0.133742	-0.0057475	0.0814958	0.0425838	0.919647	0.31718
Fbxl2	-0.207185	-0.106435	0.122176	0.0425905	0.260644	0.331511
A930017M01Rik	0.462569	-0.00956821	-0.355435	0.0425909	0.961259	0.220207
Tmod1	-0.401807	0.290914	-0.174117	0.0426105	0.134022	0.465426
Fam120a	0.0396729	0.0192492	0.0309813	0.0426522	0.284945	0.214047
Oscp1	0.287084	0.143315	-0.0975868	0.042853	0.273475	0.563349
Cacna2d1	-0.26319	0.244264	-0.252191	0.0428624	0.0709843	0.141745
Tlr4	0.259426	0.166349	-0.189939	0.0428784	0.175086	0.240391
Gpr107	0.0625422	0.0220249	-0.0401068	0.0428859	0.425411	0.296026
Acadl	-0.122563	-0.146553	0.171928	0.0429254	0.0321008	0.0512088
Kcna1	0.212774	0.0529123	-0.060987	0.0429284	0.567117	0.62447
Cacna1g	0.305913	-0.126586	0.00137461	0.0429355	0.355039	0.993797
Sema4g	-0.447264	-0.909554	0.664738	0.0429605	0.00408397	0.042682
Lamtor1	-0.0774462	-0.0834052	0.0928568	0.0429723	0.0453834	0.0811548
Srxn1	-0.103228	-0.0681695	0.0797786	0.0429874	0.165031	0.219067
Sdcbp2	0.230716	0.166803	-0.267088	0.0430073	0.135353	0.0893087
S100a16	0.0914969	-0.0754789	0.0209042	0.0430992	0.0982821	0.695386
Spock2	0.35251	0.276675	-0.256254	0.0431056	0.111487	0.24397
Cnst	-0.163905	-0.038324	0.145459	0.0431655	0.590371	0.168087
Pf4	0.345289	0.214895	-0.176984	0.043199	0.186718	0.394936
Yipf7	-0.595502	0.0486681	-0.310986	0.0432089	0.848754	0.386793
Rasl12	0.20649	-0.0530724	0.0763206	0.0432662	0.555577	0.53227
Abcc4	-0.219169	-0.0772705	0.180134	0.0433715	0.42643	0.196457
Dzip1	0.475289	0.551656	-0.827101	0.0434122	0.0359137	0.0252801
Lmcd1	-0.329447	-0.0201856	-0.0504113	0.0435507	0.886487	0.792858
Perp	0.678264	0.595814	-0.759395	0.0435966	0.083977	0.0985866
Tfam	-0.0576996	-0.0183973	0.0505077	0.0436309	0.470088	0.174096
Npr1	0.18413	-0.123287	0.124173	0.0437365	0.162125	0.277131
Crls1	-0.0578356	-0.170082	0.213885	0.0438141	0.000807676	0.00113429
9830147E19Rik	-0.267638	-0.150894	0.259638	0.0438886	0.226489	0.140161
Strip1	-0.0910029	-0.00478997	0.0666074	0.0439002	0.902613	0.243499
BC021891	0.69476	0.0635188	-0.223869	0.0439856	0.832058	0.586113
Fam57a	0.133588	0.0633233	-0.238476	0.0440334	0.299192	0.0234485
Timm8b	-0.0414732	-0.0501777	0.0608984	0.0440526	0.0316982	0.0454934
D17Wsu92e	-0.0521742	-0.00435027	0.0433192	0.0440926	0.846697	0.194577
Mras	0.0977779	0.105791	-0.099352	0.0441512	0.0459331	0.126501
Jmjd4	0.0932832	0.0259689	-0.0323542	0.0441761	0.52708	0.559319
Zfp111	0.147334	-0.00977269	0.0367434	0.0442143	0.877781	0.671986
Iqcd	-0.166229	-0.0977783	0.0124597	0.0442266	0.210777	0.897845
Dtd1	0.0985212	-0.0539918	0.00309023	0.0442448	0.238912	0.957129
Cfap221	0.464103	0.0238864	-0.173198	0.0442543	0.904995	0.531245
Afg3l1	-0.0503699	-0.0618421	0.0775449	0.0443686	0.0303748	0.0393234
Lgals4	-0.37607	-0.508804	0.606468	0.0443885	0.0215536	0.0337069
Ppp1r27	-0.47582	-0.00706663	-0.571242	0.0444425	0.972543	0.0832203
Hist2h2be	-0.0909535	0.0582686	-0.0919894	0.0444965	0.179541	0.12862
Siglece	0.531227	0.427915	-0.473089	0.0445343	0.107179	0.170272
Tppp	-0.14291	-0.106865	0.207575	0.0446557	0.128628	0.0477271
Wipf3	-0.365255	-0.105862	0.299363	0.0446592	0.512354	0.200959
Isoc2a	0.0902892	-0.148634	0.0828403	0.0446882	0.0102944	0.160337
Naa40	0.0946475	-0.0127251	-0.0540678	0.0448349	0.757212	0.352447
Maged1	0.118554	-0.0845249	0.0545277	0.0448625	0.143911	0.446947
Ston1	0.211453	0.0809786	-0.00361478	0.0448658	0.395038	0.976726
Vwa8	-0.167157	-0.0740662	0.154445	0.0448798	0.331096	0.158412
Cubn	0.424525	0.523942	-0.652426	0.0449119	0.0302273	0.0400439
Dhcr24	-0.262416	0.121621	-0.165881	0.0449279	0.311652	0.308487
Smim24	0.225511	0.196922	-0.352496	0.0449569	0.087581	0.0379135
Ptgfr	0.516477	0.327332	-0.73501	0.0449618	0.184631	0.0512162
Stradb	0.0766867	0.016177	-0.0303281	0.0449639	0.630489	0.510091
Pth1r	0.4794	0.367081	-0.114291	0.0449873	0.122288	0.686979
Slco4a1	-0.435327	0.0381842	0.201808	0.0450142	0.839889	0.444031
Nek6	0.457801	0.465569	-0.629678	0.0450489	0.0567667	0.0569592
Ddr2	0.205612	0.100891	-0.142751	0.0451657	0.287764	0.269094
Cdh19	0.27379	0.170209	-0.105196	0.0453421	0.192716	0.522723
Oplah	-0.0857929	-0.21366	0.222753	0.0453787	0.00180999	0.00563096
Ict1	-0.0621211	-0.0604968	0.0519084	0.0453879	0.0650344	0.195578
Ankrd9	-0.190706	-0.177802	0.0394323	0.0453939	0.073727	0.726885
Acsl3	-0.0899981	-0.11652	0.0805088	0.045404	0.0258848	0.170826
Rad9b	0.11688	-0.239041	0.187082	0.0454103	0.00429209	0.0354044
Rdm1	0.116528	-0.083275	0.0208835	0.0454226	0.144411	0.761768
Fbxl6	-0.176972	-0.186141	0.103695	0.0454877	0.0516816	0.343296
Zfp524	-0.11089	-0.0810526	0.0788669	0.0457811	0.138032	0.260771
Ttyh1	0.31822	-0.0293241	-0.0238296	0.0457881	0.832826	0.899037
Fam219b	0.118909	0.0394617	-0.031016	0.0458215	0.459679	0.661645
Polrmt	-0.0704227	-0.102025	0.0745856	0.0458836	0.017402	0.117919
Fam110b	0.209525	0.0103038	-0.192354	0.0458904	0.910222	0.16298
H19	-0.526883	-0.0408886	-0.297879	0.0459819	0.858998	0.360485
Phykpl	-0.0742106	-0.0431837	0.0527194	0.04602	0.219851	0.261934
Tek	0.116355	-0.0632536	0.0297481	0.0460395	0.247288	0.668277
Mrpl53	0.0245124	-0.0330404	-0.00809925	0.0460571	0.0227811	0.582225
Clptm1	-0.0398295	-0.0553117	0.0837851	0.0460588	0.020443	0.0134032
Med10	-0.107074	-0.00438251	0.096362	0.0462996	0.925421	0.17087
Lasp1	0.224736	0.167805	-0.142353	0.0463056	0.132535	0.311718
Lace1	-0.137456	-0.0668148	0.0462994	0.0463262	0.295226	0.575837
Strip2	0.700633	0.0418106	-0.114489	0.0463686	0.89155	0.783407
Nap1l4	-0.0297351	-0.0158035	-0.00667714	0.0463779	0.257577	0.706649
Cux1	-0.0836293	0.031505	0.0107805	0.046542	0.407247	0.828265
Mtif2	-0.0564188	-0.0797772	0.110168	0.0465902	0.0193866	0.0180215
Pgrmc1	0.0759863	-0.00301283	0.0852697	0.04673	0.927955	0.10363
Anapc10	0.103605	-0.0101309	-0.0820657	0.0467353	0.823938	0.219675
Tmco1	-0.01667	-0.0543065	0.0883746	0.046763	0.000551886	0.000231515
Large	0.0940325	0.0673902	-0.0995467	0.0468413	0.146622	0.119917
Vps53	-0.0891023	0.00650002	0.0475542	0.0468702	0.868137	0.388431
Sfrp4	0.396635	0.235971	-1.00852	0.0469035	0.213534	0.00641548
Efcab12	-0.273614	-0.22257	0.354968	0.0469321	0.10899	0.0702825
Arhgap42	-0.139721	0.0525343	0.0560381	0.0469828	0.409385	0.510003
Suco	0.121099	0.138393	-0.14982	0.0469954	0.0410275	0.0804166
4930549G23Rik	0.416878	0.323128	-0.464277	0.0470223	0.122789	0.106163
Sh3tc1	0.199579	0.0426097	-0.0246663	0.0470345	0.631209	0.835748
Scfd1	0.0777431	0.0369024	-0.00571926	0.0470353	0.307549	0.901633
Ap5b1	0.181793	0.0917269	-0.152392	0.0470687	0.281405	0.198686
Smarcd3	-0.0724882	0.116958	-0.0761647	0.0470745	0.0118851	0.122555
Pcdh7	0.409689	0.407537	-0.330977	0.0471833	0.0633376	0.213141
Sirt6	-0.109831	-0.100539	0.0943894	0.0472597	0.0804	0.189859
Lox	0.272117	0.150896	-0.223203	0.0472651	0.242558	0.207474
Otud6b	-0.0562802	-0.0364443	0.0549297	0.0472768	0.182558	0.145695
Rfx5	0.175796	0.183325	-0.172002	0.0474328	0.0552583	0.145235
Arhgap29	0.146834	0.0136912	0.0209779	0.0474471	0.832736	0.811237
Ano10	0.0835957	0.00830774	-0.0220336	0.0474855	0.822007	0.661901
Pisd	-0.0731301	-0.0813935	0.123909	0.0475049	0.0451687	0.0306307
Dtx2	0.228888	0.100525	-0.158114	0.0475074	0.342823	0.277949
Lrrc57	0.0635045	0.0162634	-0.0473878	0.0475354	0.568076	0.24582
Hist1h2ba	0.356069	0.471405	-0.402552	0.047609	0.0252189	0.103226
Rilp	-0.132303	-0.0668635	0.0990026	0.047712	0.282551	0.245156
Cul3	-0.028793	0.0149497	0.0207904	0.0477264	0.271147	0.259941
Serpinf1	0.25112	0.115142	-0.260655	0.0478237	0.324902	0.12765
Trappc2	0.0882286	0.0718117	-0.0325906	0.0480928	0.110945	0.545455
Zfp119a	-0.115972	-0.125453	0.104488	0.0481573	0.0500917	0.174877
Syce2	0.188549	-0.142424	0.0328758	0.0482004	0.132878	0.772121
Rspry1	0.071564	0.0641685	-0.0918627	0.0483464	0.0867517	0.0743993
Chd3	-0.200463	0.1193	-0.0952175	0.0483641	0.217206	0.443324
Haus7	0.122872	0.00036522	-0.0346774	0.0483858	0.994649	0.642061
Arel1	-0.0751195	-0.00968983	0.125718	0.0483958	0.772034	0.0326017
Tmem185b	0.122027	-0.0250384	-0.0813253	0.0484204	0.647216	0.295863
Stambp	0.0961281	0.0241483	-0.0132542	0.0484527	0.577475	0.818854
Gm14305	0.361961	0.160342	-0.201942	0.0485067	0.341951	0.373744
Slc17a5	0.165143	0.0997957	-0.0721996	0.0485071	0.211609	0.478766
Gpatch2	0.0712101	0.04205	-0.0081107	0.0485611	0.220777	0.84992
Ptrf	0.11223	-0.016406	0.0386713	0.0485878	0.743293	0.573018
Tinagl1	0.102648	-0.179693	0.115224	0.0486656	0.00896563	0.106971
Kdm4c	0.123919	0.0691113	-0.0748455	0.0487314	0.244182	0.33955
Gm15441	0.350659	-0.0386164	-0.245134	0.0487479	0.804848	0.276377
Dlg1	-0.0988406	0.0221139	-0.050042	0.0487534	0.619266	0.416899
Dapk1	0.344236	0.115122	-0.260434	0.0487754	0.464785	0.243537
Pcolce	0.202734	0.125963	-0.178744	0.0487929	0.201662	0.184188
Kcnd3	0.406306	0.210527	0.0537428	0.0488193	0.275057	0.826472
1810019D21Rik	0.336628	-0.0330965	-0.0396484	0.0489576	0.825533	0.845282
Ulk1	0.0802012	-0.00245164	-0.0554389	0.0489594	0.945229	0.281739
Zfp944	-0.112839	-0.0361698	0.100216	0.048989	0.483109	0.181996
Tfb2m	-0.078027	-0.0382359	0.100377	0.049002	0.299407	0.0748437
Omp	-0.86842	-0.825035	1.06223	0.0490183	0.0748793	0.086037
Emc8	-0.0659044	-0.0903692	0.110716	0.0490249	0.0229992	0.0326365
Col4a5	0.192742	-0.155676	-0.0939385	0.0490594	0.114844	0.434221
Adamts14	0.454583	0.310941	-0.205575	0.0490656	0.167269	0.46613
Ppp2r3a	-0.0984866	0.106354	-0.0801571	0.049187	0.0514298	0.215404
Plp2	0.186261	-0.0150058	-0.0375273	0.0492067	0.856767	0.739916
Xylt2	0.112763	-0.0210025	0.0272916	0.0492384	0.678839	0.690887
Ndufv2	-0.0412614	-0.0593788	0.0731271	0.0493002	0.0194138	0.0273012
B3gntl1	0.159134	0.0603468	-0.0623535	0.0493031	0.412338	0.525467
Setd4	-0.0905439	-0.0183916	0.0568964	0.0493227	0.652327	0.323912
Cacna1d	-0.135917	-0.180167	0.358844	0.0493391	0.0261377	0.00586595
4930579G24Rik	0.0904981	0.0496806	-0.208134	0.049387	0.252429	0.0103066
Hist2h2aa1	0.197363	-0.0840527	-0.0517346	0.0494143	0.361837	0.667506
Gas6	0.336123	0.157304	-0.316989	0.0494293	0.320561	0.161837
Kng1	-0.137572	0.00779349	-0.114275	0.049448	0.899073	0.208148
Icam4	0.408464	0.500847	-0.527869	0.0494648	0.0342957	0.0745155
Tpi1	-0.0784279	0.0270329	-0.0731626	0.0494923	0.453967	0.165724
Sfrp2	0.464865	0.147755	-0.126117	0.049536	0.48808	0.657082
Gm15816	-0.419584	0.223121	-0.568132	0.0497096	0.266555	0.065475
Ecm1	0.31687	0.15152	-0.233241	0.049798	0.312235	0.257577
S100a6	0.245302	0.102201	-0.21841	0.0498617	0.372746	0.183133
Atl3	0.0894898	0.0326631	0.0667301	0.0499109	0.430603	0.252511
L3mbtl2	0.0808748	0.048641	-0.0676878	0.0499379	0.217079	0.206464
Papss1	0.087392	0.0124547	-0.00796566	0.0499451	0.751545	0.880622
Ksr1	-0.142093	0.100686	-0.117859	0.0499598	0.157157	0.209984
Spry4	0.421409	-0.418871	-0.0570486	0.0500561	0.0670744	0.823872
Gm13710	0.513279	0.383777	-0.272903	0.0501502	0.140004	0.399513
4933433H22Rik	-0.658747	-0.0742944	0.294294	0.0501715	0.802051	0.474242
Gm14308	0.243845	0.129378	-0.318457	0.0502947	0.269076	0.0734329
Aoc3	0.167744	-0.089826	0.121118	0.050335	0.265307	0.26706
Aldoc	0.449239	0.102369	-0.504056	0.0503837	0.616595	0.1101
Krt19	1.40573	0.445256	-1.65856	0.0504242	0.491861	0.096961
Gm5434	-0.324358	-0.189159	0.427899	0.0504719	0.230648	0.0715884
Cd200	0.195938	-0.113755	0.0316297	0.0505483	0.232649	0.79157
Nme7	0.098473	0.0856883	-0.156516	0.0505884	0.0975753	0.0405843
Smpd3	0.333658	-0.515591	0.0557296	0.0506993	0.0153804	0.784771
Tusc1	-0.136869	-0.192061	0.167919	0.0507022	0.0219992	0.0878665
Syde1	0.111802	-0.0175209	-0.00823947	0.0507507	0.729347	0.903804
2310001K24Rik	-0.319973	-0.409304	0.577855	0.0508347	0.0305943	0.026453
Fbxo40	-0.420817	0.295898	-0.183941	0.0508473	0.161692	0.485119
Nnt	-0.343125	0.0271687	-0.0981986	0.0508701	0.860664	0.642735
3830406C13Rik	0.0732983	0.015917	-0.0493512	0.0508837	0.633903	0.298304
Klrg2	0.514579	0.432413	-0.617316	0.0509375	0.107263	0.0936279
Thbs2	0.234179	0.148024	-0.305996	0.0509932	0.200499	0.0742475
Zfp961	-0.163267	-0.0751173	0.23613	0.0510084	0.33241	0.0551277
Nudt21	0.103305	0.05244	-0.0789789	0.051058	0.289915	0.245246
Ttc23	0.104552	-0.022617	-0.00428871	0.0511512	0.635727	0.946473
Ugdh	0.149011	0.0555863	-0.0688535	0.0511613	0.424621	0.462706
Ube2ql1	-0.450542	-0.0183142	0.409844	0.0512568	0.928284	0.178585
BC025920	-0.16684	-0.0280776	-0.0054967	0.0512836	0.711413	0.95703
Ap3s1	0.0625157	-0.0631137	0.068878	0.0512947	0.0655873	0.116783
Spty2d1	0.160002	-0.0324021	-0.127485	0.0512997	0.657267	0.22914
Mgat3	0.273286	0.335879	-0.187162	0.0513021	0.0353926	0.292115
Actn2	-0.58284	-0.0458826	-0.166609	0.0513623	0.861882	0.644117
Pafah2	-0.140892	-0.196122	0.187159	0.0514116	0.0230162	0.0713871
Tmem242	0.0480914	-0.0457806	0.0100742	0.0515732	0.0779372	0.733943
Ccdc80	0.558363	0.0961343	-0.0555302	0.0516164	0.705739	0.871225
1110002L01Rik	-0.100822	-0.0192749	0.139489	0.0516693	0.675664	0.0637509
Guf1	-0.0439922	-0.0521152	0.0554123	0.051685	0.0402904	0.0832054
Mrpl30	0.0630231	-0.0606598	0.0694753	0.0517412	0.0757955	0.117422
Adcy5	0.512174	0.158539	-0.0380811	0.0517433	0.504668	0.903555
Fam89a	-0.182388	-0.345856	0.315098	0.0517752	0.00702116	0.0314939
Strbp	-0.0923846	0.00191266	0.0327369	0.0517954	0.963549	0.570238
Slc27a1	-0.144679	-0.188951	0.366682	0.0517957	0.029079	0.00740916
Serf1	0.101068	-0.191127	0.126225	0.0518295	0.00711083	0.0853641
Bag6	0.0425061	-0.0479935	0.0636297	0.0518558	0.0471747	0.0503954
Tram2	0.305432	0.29624	-0.289884	0.0518853	0.0743669	0.165009
1810055G02Rik	0.110176	0.0375176	-0.128997	0.0518896	0.465545	0.101284
Pdzd7	-0.0903502	0.0864676	0.1218	0.0518968	0.0772243	0.0690348
Rnf10	-0.0370569	-0.011479	0.0329091	0.0520199	0.505071	0.189082
Nap1l5	-0.228606	-0.484181	0.283385	0.0520555	0.00445126	0.0874305
Zfp783	0.185516	0.00866119	0.0802803	0.0520581	0.918088	0.492395
Fbp1	-0.423648	0.315405	0.282317	0.0520742	0.14525	0.305973
Immt	-0.0516453	-0.0732639	0.0952601	0.0521518	0.0218573	0.0252766
Aacs	-0.170225	0.0544823	0.345885	0.0522716	0.492349	0.0178216
Slamf9	0.548037	0.756847	-0.811831	0.0523893	0.0242023	0.0525964
2900008C10Rik	-0.268936	-0.133182	0.11256	0.0524055	0.304186	0.506902
Klhl17	0.0674772	-0.0623353	0.0140015	0.0524217	0.0858592	0.737655
Arid3a	0.247246	0.30341	-0.148104	0.0525364	0.0364987	0.35378
Trp53inp1	-0.363835	-0.139622	0.504233	0.0525846	0.416191	0.0644992
Tjp1	0.0708531	-0.099515	0.141356	0.0525848	0.0228794	0.0192118
Acta2	0.195711	-0.0191903	-0.0513605	0.0525862	0.829867	0.673249
Eif1a	0.115744	-0.0233704	-0.0394187	0.0526555	0.660827	0.586776
Gnai1	0.192749	-0.0330463	0.107598	0.0526659	0.70869	0.3851
Naf1	0.120005	0.0569167	-0.0942424	0.0528119	0.324038	0.238757
Toporsos	0.1145	-0.0428232	-0.0288122	0.0528196	0.427965	0.686151
Tppp3	-0.160508	-0.23246	0.0890269	0.0528498	0.0205907	0.388407
1300002E11Rik	0.0977764	-0.0583754	0.00551278	0.0528829	0.227292	0.927278
C1s1	0.303131	0.218819	-0.224177	0.0529553	0.157233	0.263891
Lig3	0.10504	0.0275377	-0.0281976	0.052957	0.572264	0.667047
Pla2g16	0.140573	-0.0536441	0.130425	0.0529816	0.419679	0.175353
Hsd17b11	0.0605975	-0.0720301	0.0396096	0.0530177	0.0409343	0.316879
Ppp1r15b	0.118413	-0.0993302	-0.0160007	0.0530906	0.11139	0.827429
Dqx1	-0.160648	-0.269216	0.262898	0.0531558	0.0119338	0.0388707
Asf1b	0.188365	0.194211	-0.236106	0.0531716	0.0638044	0.086444
Gm2381	-0.315285	0.104064	0.260455	0.0531766	0.481928	0.21942
Etfdh	-0.104888	-0.112165	0.113306	0.0532044	0.0572582	0.125954
Tagln	0.250883	0.112765	-0.139491	0.0532481	0.348736	0.388417
Psmb5	-0.0553481	-0.0598925	0.0822679	0.0532572	0.0552925	0.0529126
Taf1c	-0.137485	-0.0609003	-0.0486497	0.0532969	0.355276	0.574201
Otop1	-0.23486	-0.0495643	0.147265	0.0533513	0.648208	0.335922
Osr2	0.242598	0.0890909	-0.00324119	0.0534496	0.437487	0.982797
Scara3	0.315553	0.264965	-0.358508	0.0534862	0.111781	0.111977
Gm826	-0.501548	-0.402303	0.523643	0.053519	0.124929	0.136929
Hotairm1	0.160747	-0.140547	0.0178704	0.053562	0.101081	0.857947
1700007K13Rik	0.325124	0.199779	-1.09546	0.0536081	0.217657	0.00230276
Cldn1	0.343542	0.290442	-0.467246	0.0537324	0.110315	0.0695184
Fbxl18	0.14655	0.0360242	-0.118803	0.0539432	0.597842	0.228745
Ebp	0.0818781	-0.0666083	0.0667347	0.0539647	0.121588	0.226645
Fam83f	0.617522	1.03449	-0.960771	0.0540868	0.0122169	0.046603
Plscr3	0.0966982	-0.0356049	-0.0610727	0.0541269	0.438118	0.334817
Laptm4a	0.0666192	-0.0204374	-0.00488889	0.0542166	0.514417	0.906225
C330006A16Rik	0.0422201	-0.0725399	0.0193836	0.0542261	0.0111	0.473348
Sdhb	-0.0357987	-0.108253	0.0767572	0.0542305	0.000971678	0.0152262
Slitrk6	0.477029	-0.214643	-0.267702	0.0542867	0.351028	0.387107
R3hdm2	-0.0513242	-0.00351213	0.0310016	0.0543029	0.881877	0.354843
Ctdnep1	-0.0653667	-0.0510715	0.0436776	0.0543127	0.13433	0.310734
Lyrm7	0.0460706	-0.0485238	-0.0492969	0.0544029	0.0612442	0.131
Akr1e1	0.100012	0.0390824	-0.068838	0.0544299	0.413185	0.29822
Plek2	0.514618	0.412911	-0.183404	0.0544607	0.12653	0.574168
Fkbp9	0.0944256	-0.0271831	0.0276541	0.0544937	0.540229	0.642494
Fem1c	0.143076	0.0845197	-0.0915413	0.0545887	0.235699	0.330368
Errfi1	0.209995	-0.372933	0.0785454	0.0546194	0.00982734	0.556393
2310057M21Rik	0.155338	0.0220762	-0.150541	0.0546453	0.759028	0.163623
Tuba8	-0.120448	0.0688563	-0.152133	0.0546719	0.24928	0.0867804
Ppfibp1	0.120125	0.042877	-0.066901	0.0547011	0.45288	0.391533
Zeb2	0.158367	0.037354	-0.049308	0.0547492	0.613998	0.622687
Pex14	-0.113603	-0.124148	0.0922533	0.054755	0.055156	0.230004
Pcdh20	-0.330276	0.195137	0.339488	0.0548532	0.236273	0.144424
C330007P06Rik	-0.0631478	-0.0324176	0.157886	0.0549283	0.295278	0.0084638
Cdk12	0.133952	-0.0257965	-0.0677952	0.0549381	0.679442	0.433738
Dusp7	0.134642	0.0222168	-0.127074	0.0549533	0.722668	0.173516
Gm6710	0.160668	0.111968	-0.0156743	0.0549656	0.173619	0.876181
Slc12a9	-0.0990946	-0.196046	0.1921	0.0551572	0.00641703	0.0225844
Fndc3b	0.151516	0.0517807	-0.00889983	0.0551599	0.472396	0.92528
Gm11747	0.318889	0.168539	-0.207994	0.055192	0.28349	0.323532
Cnn3	0.133212	0.0265185	-0.0541451	0.0552015	0.669941	0.525438
Dnaja2	-0.0515677	-0.011124	0.0248841	0.0552847	0.644892	0.455013
Auts2	0.125317	0.0774266	-0.16897	0.0552901	0.219472	0.0731865
Plp1	0.224109	0.182224	-0.108692	0.0553743	0.124204	0.453091
Smim10l2a	0.458626	0.342311	-0.30169	0.0554077	0.151024	0.320385
Tmem55a	-0.0563606	-0.0395774	0.0702111	0.0554338	0.171908	0.0911394
Sec14l3	-0.969314	-0.739256	1.11125	0.055453	0.144087	0.112748
Nras	0.0862684	0.0855266	-0.0803759	0.0554878	0.0743573	0.179262
Sgcg	0.051675	-0.0447329	0.028166	0.0555309	0.106826	0.403109
Cep76	0.115747	0.0970687	-0.108894	0.0555956	0.115665	0.176008
Lman2	-0.0409141	-0.0715508	0.0716206	0.0556006	0.0106917	0.0325934
Dag1	-0.0560228	-0.0426192	0.123374	0.0556336	0.14524	0.0141952
Ssb	0.0771076	0.094544	-0.109259	0.0556896	0.0389783	0.0638494
Gnpat	0.0788564	-0.0390443	0.0391548	0.055751	0.313015	0.444011
Rassf9	0.129231	0.0255591	-0.0954441	0.0557979	0.672986	0.271631
Cdc14b	-0.0868348	0.00124093	0.112427	0.0558008	0.975436	0.0826309
Wfs1	-0.0986745	-0.0454933	0.090953	0.0558086	0.344322	0.183838
Tmem106b	-0.0714969	-0.0639942	0.0785134	0.0558412	0.098569	0.125776
Sh3pxd2a	0.253414	-0.131169	-0.0314214	0.055866	0.294125	0.843964
E430018J23Rik	0.106963	-0.0404961	-0.0796825	0.0558689	0.430605	0.268174
Vps33a	-0.0442866	-0.0445707	0.0737643	0.0558748	0.071718	0.0387012
Cdc34	-0.100619	0.00977207	0.0220997	0.0559106	0.834733	0.728579
Fasn	-0.334803	0.00160819	0.35656	0.0559139	0.991748	0.135212
Cpa3	0.636366	0.347019	-0.826141	0.0559634	0.272154	0.0822387
Psph	-0.0948061	-0.00322647	0.111395	0.0559835	0.941624	0.106885
Bcorl1	0.162561	-0.0148371	-0.0620897	0.0560351	0.844625	0.551608
Dpy30	0.0445834	-0.0614279	0.034823	0.0561221	0.0264271	0.249094
Zdhhc15	0.469035	0.657806	-0.836503	0.056182	0.0248508	0.0309425
Cd300ld	0.470647	0.51417	-0.234602	0.0561939	0.0566587	0.443462
Trim37	0.0494211	-0.0703308	0.0838631	0.056214	0.0236043	0.0366296
P2rx3	0.209856	-0.0686059	-0.121489	0.0562329	0.49344	0.37853
Gm14057	-0.202875	-0.146417	0.178631	0.0562619	0.16406	0.201884
Scoc	0.0562018	0.0158383	0.0171921	0.0563446	0.552676	0.631786
Tpst1	0.143357	-0.00601995	-0.0788214	0.0563654	0.928174	0.401451
AU019823	0.123364	0.00438667	-0.0631916	0.0563658	0.939148	0.43219
Abca1	0.125929	-0.0156513	0.22768	0.0563899	0.79035	0.0296433
Ttll7	-0.252835	0.297992	-0.0924541	0.0564131	0.0449203	0.568912
Meox2	0.128749	0.0224099	-0.0652646	0.0564701	0.710791	0.43695
Gpr19	0.207536	0.11581	-0.0929577	0.0564839	0.263752	0.48918
Fbln2	0.0872631	-0.0426006	0.0324261	0.0565126	0.321106	0.56311
Tgfbr2	0.121826	0.114743	0.0361879	0.0565435	0.0871136	0.641829
Zfp820	-0.138897	-0.0510216	0.0988649	0.0566633	0.445577	0.289485
Diap2	0.0732147	0.00138206	0.108784	0.0566826	0.967726	0.0563846
5430425K12Rik	-0.245818	-0.101137	0.278548	0.0567403	0.396678	0.118162
Atp6v1c2	0.538363	-0.301877	-0.0596305	0.0568053	0.262512	0.861128
Myh6	-1.20307	-0.398495	0.728323	0.0568309	0.48948	0.360427
2310068J16Rik	-0.373475	-0.0451727	0.327713	0.0568311	0.796319	0.204464
Cab39l	0.0622039	0.0246174	-0.0184312	0.056838	0.41387	0.6432
Zdhhc23	0.280066	0.206013	-0.329456	0.0568668	0.158757	0.107962
Pabpc1	0.136887	0.0297044	-0.0462024	0.0568731	0.645989	0.59904
Mark3	0.0671898	0.00307376	-0.00404744	0.0569399	0.922038	0.924173
Fez1	0.193238	0.15626	-0.140496	0.0570061	0.128695	0.281271
Itgb5	0.151265	0.0134889	-0.132651	0.0570216	0.848993	0.205115
Polr2j	-0.0717621	-0.0494217	0.0645218	0.0570436	0.18225	0.195706
Prpf19	-0.063663	0.0316522	0.0018953	0.0571307	0.31472	0.96251
Mal	0.343316	0.363211	-0.402776	0.0572113	0.0634763	0.109232
Hfe	0.0864584	0.0479313	-0.0168187	0.0573261	0.268549	0.760157
Ptpn4	0.157581	-0.0582144	0.0218496	0.0573303	0.444804	0.82733
Tgfbr3	0.119868	-0.0547864	0.139716	0.0573708	0.352133	0.111265
Twist1	0.217803	-0.173466	0.0308027	0.0573886	0.134005	0.824014
Sdpr	0.103585	-0.0673417	0.139262	0.0573907	0.204492	0.0763864
Ric8	0.110068	0.0269468	-0.0625197	0.0574638	0.606597	0.390008
Lama3	0.263406	0.154148	-0.0825855	0.0575201	0.246532	0.625825
Hapln4	0.25397	0.24318	-0.357063	0.0575785	0.0846802	0.0674565
Snx33	0.12074	0.021247	-0.149064	0.0575968	0.709589	0.0964664
Myh3	-0.56339	0.16589	-0.283021	0.0576138	0.538578	0.443667
Cxx1a	0.169222	-0.0193062	-0.0911972	0.0576335	0.808437	0.413386
Sntb1	0.36079	0.303113	-0.106523	0.0576748	0.1186	0.645916
Pno1	-0.0531949	-0.053712	0.0611446	0.057771	0.0733137	0.115798
Rab18	0.0426006	-0.00769172	0.0256155	0.0577861	0.7028	0.365832
Zfp667	0.123524	0.127809	-0.167015	0.0579422	0.0685618	0.0758513
Tmem204	-0.0917077	-0.19543	0.162767	0.0579543	0.00503445	0.032581
Fam20c	0.334839	0.121771	-0.0777544	0.0579654	0.453057	0.71711
Trnau1ap	0.076417	-0.080992	0.00656967	0.0580241	0.0640128	0.892673
Lin9	0.153188	0.18896	-0.0219182	0.0580504	0.0399762	0.82266
Tmem79	0.179377	0.0449106	-0.0666353	0.0580527	0.5999	0.566561
BC003331	0.0650072	0.036762	0.0254995	0.0581054	0.262101	0.545979
Ube4a	-0.0517782	-0.0314188	0.176605	0.0581084	0.233186	0.0024529
Phka1	-0.225334	0.178923	-0.141118	0.0581429	0.136281	0.348858
Ajap1	0.316184	-0.27713	0.193981	0.058151	0.107579	0.357916
Pltp	0.0875397	-0.00986705	0.0191239	0.0581544	0.811235	0.733272
Slc26a10	-0.229228	-0.376446	0.387838	0.0582108	0.0144864	0.03843
Tmed4	0.0619393	-0.0610181	0.036514	0.0582173	0.0791204	0.375607
Tbx15	-0.352234	0.218849	-0.0804264	0.0582691	0.224104	0.722035
1810043H04Rik	0.0712808	-0.129192	0.0902496	0.058292	0.00987049	0.0912342
Mtm1	-0.0822482	-0.150609	0.187201	0.0582994	0.00947506	0.0132696
Zbtb33	0.113284	0.0891194	-0.0304502	0.0583906	0.139639	0.676382
Mzt2	0.0512765	-0.0112013	-0.0342421	0.0584595	0.646782	0.321545
Pm20d2	-0.0601052	-0.0204816	-0.0479293	0.0585121	0.481736	0.246256
Elk4	0.143278	0.106955	-0.0793027	0.0585516	0.157058	0.404055
Lpin3	-0.0923467	-0.103954	0.236546	0.058573	0.0539246	0.00836209
Clcn4-2	0.0446827	-0.0318877	0.0163771	0.0586238	0.172739	0.572786
Lppos	0.17891	0.0164679	-0.0267422	0.0586391	0.845627	0.815527
Ankrd32	0.111854	0.0408012	-0.115493	0.0586621	0.453458	0.15017
Wrap53	-0.0973637	-0.0788852	0.096228	0.058688	0.131027	0.164975
Cit	0.374851	0.622573	-0.738399	0.058722	0.0140289	0.0229686
C920006O11Rik	0.195383	-0.0679729	0.0121127	0.0587762	0.473722	0.922786
Mrpl46	-0.0737378	-0.0288488	0.0600258	0.0587996	0.423733	0.238511
Rexo2	-0.0383481	-0.0419375	0.0879361	0.0588023	0.0591002	0.0130351
Pja1	0.0782659	-0.0598382	0.00744293	0.0588176	0.14961	0.881915
Nfu1	-0.0548568	-0.0495614	0.054623	0.0588228	0.100587	0.162669
Shank1	0.465204	0.488645	-0.657902	0.058889	0.0666677	0.067769
Ccnj	0.0391875	8.08108e-05	0.0691167	0.0588976	0.996518	0.033892
Prpf40a	0.0518499	0.0761949	-0.0195336	0.0589228	0.0222416	0.563146
Snx14	0.0696012	-0.0228276	0.026762	0.0589516	0.49853	0.555477
Abhd13	0.054368	0.0404365	-0.0130496	0.0589754	0.159109	0.709733
Ccng2	-0.162185	-0.111846	-0.0210352	0.0589958	0.185828	0.839778
Dcbld1	-0.170751	-0.201989	0.356922	0.0590738	0.0466098	0.0186258
Fth1	-0.079199	-0.0379302	0.106348	0.0591239	0.336024	0.0787871
Tmem214	0.052319	-0.0120439	0.0181816	0.0591947	0.630988	0.593376
Slc25a5	0.0426143	-0.0531239	0.0419931	0.0592148	0.039462	0.167031
Tmem170	0.0960209	0.0811395	0.0133908	0.0592537	0.119515	0.828208
Elp5	0.0504845	-0.08259	0.0351105	0.0592588	0.0150373	0.305868
Trpm7	-0.0482951	-0.0255853	0.159355	0.0592862	0.292607	0.00292181
AI606473	0.419256	-0.00612461	0.125584	0.0593816	0.975403	0.64439
Kcna5	-0.128388	-0.21416	0.311283	0.0594248	0.0140095	0.0106239
Tspan2	0.120132	-0.110455	-0.00616493	0.0594371	0.0969991	0.93628
Blvra	0.0983479	0.0627581	-0.0828509	0.059493	0.216319	0.226309
4930506C21Rik	-0.107806	0.00654689	0.143245	0.0595045	0.898165	0.0815907
Vldlr	-0.076499	-0.0812595	0.200758	0.0595295	0.065207	0.0077459
Metap1d	-0.0517183	-0.0903367	0.0103805	0.0595534	0.0117493	0.755837
Swi5	-0.0772747	-0.0634348	0.0708833	0.0595992	0.128616	0.193665
Rcbtb2	0.0685253	-0.0310062	0.0333846	0.0596403	0.362225	0.461604
Zfp445	-0.10903	-0.0774954	0.162649	0.0597636	0.176458	0.0587434
Fam81a	0.208524	0.0890631	-0.181254	0.0598013	0.387948	0.214649
BC055324	0.326174	0.589063	-0.560725	0.0598042	0.0103578	0.0375605
Armcx5	0.128046	0.0324155	-0.0124239	0.0598562	0.599594	0.880239
Klhl33	-0.471557	0.204299	-0.396939	0.0599128	0.381972	0.22756
Ier3ip1	0.0989157	-0.063082	0.0230194	0.0600184	0.217709	0.719619
Nt5dc1	-0.0985539	0.0044224	0.0962551	0.0600616	0.924863	0.171818
Olfr20	-0.189861	-0.0387034	0.459979	0.0601271	0.671337	0.0108225
Srprb	0.0387646	-0.026147	-0.0289597	0.0602324	0.196629	0.277524
1700028J19Rik	0.480893	0.262352	-0.463089	0.0602399	0.282338	0.177191
Rdh10	0.115855	0.109243	-0.0950315	0.0602466	0.0918782	0.238717
Prmt2	0.0616659	0.00650997	-0.106259	0.0603061	0.82502	0.0376162
Usb1	0.121671	0.0478799	-0.159351	0.0604129	0.425128	0.0860399
Ckb	-0.198828	-0.318004	0.0834417	0.0604673	0.0168035	0.524738
Gm20743	-0.440784	0.170933	-0.33849	0.0605065	0.431682	0.266544
S100a10	0.0688728	0.0268886	-0.0704329	0.0605276	0.428831	0.15685
Nnat	1.10734	-0.131385	-0.289122	0.0605423	0.80414	0.688512
Fam185a	0.0516836	-0.0858914	0.0379933	0.0605503	0.0145569	0.285136
Tmem181a	0.1181	-0.0287391	-0.0201136	0.060565	0.614774	0.792736
Palm2	0.272059	-0.0110672	-0.208808	0.060569	0.932052	0.266917
Acot10	0.245473	-0.0870907	-0.27564	0.060592	0.469762	0.127216
Itpka	0.155622	-0.130199	0.198055	0.0606724	0.124736	0.0932337
Plxna3	0.282918	0.0456662	-0.0368473	0.0607518	0.736841	0.840664
Ogdh	-0.067552	-0.0976063	0.12617	0.0609489	0.0246117	0.0289709
Lurap1	0.0879478	-0.0650969	0.00330451	0.0609667	0.164564	0.95371
Ssr1	0.0676624	-0.00615014	0.0388338	0.0610368	0.849524	0.39428
Zfp882	-0.161557	0.00361864	-0.120312	0.0610734	0.962649	0.280846
Csrp1	0.216659	0.0834995	-0.167799	0.0610745	0.435703	0.264296
Cdc16	0.0548873	0.0669873	-0.023919	0.0610816	0.0437259	0.511019
Myot	-0.555539	0.194717	-0.390811	0.0612494	0.476371	0.305703
Kcnj15	0.374631	0.302332	0.146925	0.061334	0.136797	0.552993
Dmpk	-0.130369	-0.00549377	-0.0591686	0.0613826	0.929934	0.495162
Adamts2	0.224328	-0.0979359	-0.0262991	0.0614005	0.382224	0.856838
Sox7	-0.122928	-0.0697411	0.14821	0.0614455	0.268586	0.108291
Tbx5	0.238888	-0.308626	0.215504	0.0615009	0.0365741	0.203946
Kcnc1	-0.546569	0.360687	-0.294244	0.0615591	0.207736	0.423403
[truncated: 12,679 more rows]
