# Supplementary material for: Transcriptomic and metabolomic profiling of long-lived growth hormone releasing hormone knock-out mice: evidence for altered mitochondrial function and amino acid metabolism
Source: Aging (Albany NY). 2020 Feb 23;12(4):3473–85. doi: 10.18632/aging.102822 (PMC7066919; doi:10.18632/aging.102822)
Supplement: Supplementary Table 6 [file aging-12-102822-s001..xlsx]

## Sheet: Table S6 Gene ontology results
Supplementary Table 6. Gene ontology pathways up or down regulated in GHRH-KO mice. Note GHRH-KO mice have elevated gene transcript abundances of mitochondria and amino acid metabolism genes.
Variable	GO category	Over represented p-value	Differentially expressed genes	Genes in category	Pathway	Ontology group
Higher in GHRH-KO
	GO:0005739	3.89572e-09	54	1558	mitochondrion	CC
	GO:0009063	4.183e-08	10	64	cellular amino acid catabolic process	BP
	GO:0044429	1.18011e-07	32	721	mitochondrial part	CC
	GO:1901606	1.21748e-07	9	54	alpha-amino acid catabolic process	BP
	GO:0044281	1.40538e-07	46	1412	small molecule metabolic process	BP
	GO:0005743	1.91003e-07	22	376	mitochondrial inner membrane	CC
	GO:0016054	4.91889e-07	14	177	organic acid catabolic process	BP
	GO:0046395	4.91889e-07	14	177	carboxylic acid catabolic process	BP
	GO:0019866	6.49263e-07	22	409	organelle inner membrane	CC
	GO:0006732	6.5341e-07	17	267	coenzyme metabolic process	BP
	GO:0051188	1.53726e-06	14	195	cofactor biosynthetic process	BP
	GO:0031966	1.81796e-06	24	517	mitochondrial membrane	CC
	GO:0019752	2.00589e-06	28	709	carboxylic acid metabolic process	BP
	GO:0005740	2.14778e-06	25	555	mitochondrial envelope	CC
	GO:0009108	2.71386e-06	12	150	coenzyme biosynthetic process	BP
	GO:0043436	3.79171e-06	28	737	oxoacid metabolic process	BP
	GO:0051186	4.51918e-06	20	402	cofactor metabolic process	BP
	GO:0006082	4.95312e-06	28	747	organic acid metabolic process	BP
	GO:0044282	7.26255e-06	15	251	small molecule catabolic process	BP
	GO:1901605	1.55784e-05	11	151	alpha-amino acid metabolic process	BP
	GO:0044283	2.25951e-05	21	511	small molecule biosynthetic process	BP
	GO:0006520	2.49093e-05	13	219	cellular amino acid metabolic process	BP
	GO:0031967	2.67232e-05	30	900	organelle envelope	CC
	GO:0031975	2.67232e-05	30	900	envelope	CC
	GO:0009066	3.4889e-05	6	40	aspartate family amino acid metabolic process	BP
	GO:0006733	3.57234e-05	10	135	oxidoreduction coenzyme metabolic process	BP
	GO:0046394	5.81725e-05	14	277	carboxylic acid biosynthetic process	BP
	GO:0006629	6.00853e-05	29	936	lipid metabolic process	BP
	GO:0016053	6.08129e-05	14	278	organic acid biosynthetic process	BP
Higher in WT
	GO:0005576	6.25e-07	51	1253	extracellular region	CC
	GO:0044421	1.8e-06	43	998	extracellular region part	CC
	GO:0005615	1.99e-06	37	812	extracellular space	CC
Higher in Females
	GO:0030546	0.00016705	2	6	receptor activator activity	MF
Genotype-Sex Interaction
	GO:0048037	3.40177e-10	27	395	cofactor binding	MF
	GO:0050662	3.69722e-10	21	237	coenzyme binding	MF
	GO:0044281	9.70031e-07	48	1412	small molecule metabolic process	BP
	GO:0006777	1.04232e-06	4	6	Mo-molybdopterin cofactor biosynthetic process	BP
	GO:0019720	1.04232e-06	4	6	Mo-molybdopterin cofactor metabolic process	BP
	GO:0043545	2.37861e-06	4	7	molybdopterin cofactor metabolic process	BP
	GO:0051189	2.37861e-06	4	7	prosthetic group metabolic process	BP
	GO:0016491	3.36682e-06	26	579	oxidoreductase activity	MF
	GO:0050660	4.79943e-06	9	76	flavin adenine dinucleotide binding	MF
	GO:0006082	6.58144e-06	30	747	organic acid metabolic process	BP
	GO:0019752	6.60641e-06	29	709	carboxylic acid metabolic process	BP
	GO:0006732	9.56266e-06	16	267	coenzyme metabolic process	BP
	GO:0051186	1.1229e-05	20	402	cofactor metabolic process	BP
	GO:0043436	1.40188e-05	29	737	oxoacid metabolic process	BP
