# Supplementary material for: Transcriptomic and metabolomic profiling of long-lived growth hormone releasing hormone knock-out mice: evidence for altered mitochondrial function and amino acid metabolism
Source: Aging (Albany NY). 2020 Feb 23;12(4):3473–85. doi: 10.18632/aging.102822 (PMC7066919; doi:10.18632/aging.102822)
Supplement: Supplementary Table 7 [file aging-12-102822-s003..xlsx]

## Sheet: Table S7 Positive pvalues
Supplementary Table 7. Positive ionization mode metabolite liinear model pvalues.
Mass/charge ratio	Retention time	Sex Estimate	Genotype Estimate	Interaction Estimate	Sex P-value	Genotype P-value	Interaction P-value
58.0657	5.00737	0.075432	0.0877796	-0.3052	0.862411	0.840226	0.622464
142.946	5.00869	0.190213	-0.00319693	-0.0421384	0.507	0.990972	0.91604
481.014	5.00973	0.268757	-0.142985	-0.286478	0.610214	0.784951	0.699762
161.617	5.01422	0.622161	-0.020809	-0.22758	0.0382028	0.935971	0.539409
162.112	5.01481	0.233709	-0.0766571	0.142184	0.0634775	0.500117	0.381434
471.059	5.03592	0.207633	0.0182401	0.0583409	0.535958	0.956091	0.900939
493.034	5.03819	0.349322	-0.0474429	-0.0806393	0.37842	0.902358	0.882802
367.121	5.04131	0.243914	0.0328163	-0.283574	0.317141	0.88941	0.405999
138.905	5.04753	0.31087	0.00129256	-0.182847	0.282079	0.996291	0.644306
428.097	5.06002	0.101859	0.0202055	0.0551685	0.716562	0.942348	0.889009
427.095	5.0609	-0.122741	-0.0571491	0.30049	0.582641	0.796513	0.350595
150.997	5.08063	0.635659	-0.317838	0.0277507	0.0802667	0.346125	0.952237
103.79	5.08787	0.295927	-0.232738	-0.144949	0.461254	0.559646	0.795453
365.105	5.09067	-0.842967	-0.390824	0.534005	0.0489184	0.313461	0.329086
104.106	5.09144	-0.156081	-0.159429	0.0999063	0.464602	0.455412	0.737134
187.057	5.09544	0.442869	-0.0456695	-0.379902	0.139791	0.869958	0.349184
214.552	5.11627	0.191697	0.0178681	0.142724	0.595354	0.960153	0.778342
129.015	5.11835	0.510584	-0.329441	0.183402	0.0777219	0.228128	0.621297
116.07	5.17213	0.127167	0.569443	-0.17687	0.678996	0.0907504	0.683955
70.0654	5.17213	0.450223	0.562434	-0.426415	0.275324	0.181681	0.455522
115.717	5.20072	0.590108	0.631073	-0.539102	0.271119	0.241771	0.467024
74.06	5.25156	0.0445193	-0.0536957	0.262771	0.919259	0.902707	0.673937
178.992	5.33333	0.0897879	0.200517	-0.44591	0.848186	0.670484	0.507109
398.135	5.41553	0.138791	-0.297195	0.174849	0.618183	0.29919	0.656501
233.945	5.41576	-0.00831318	0.184872	-0.402778	0.983541	0.648648	0.486711
397.131	5.41696	-0.0966848	-0.330687	0.353201	0.629699	0.124804	0.231511
275.026	5.41707	0.136369	-0.483587	0.322879	0.55931	0.0627685	0.337635
332.982	5.4311	0.188198	-0.224796	0.00945279	0.426658	0.346466	0.977001
137.534	5.49324	0.119169	-0.600854	0.42553	0.650519	0.0450645	0.268852
117.726	5.49975	0.500345	0.226177	-0.212248	0.207017	0.552109	0.691279
118.086	5.50108	-0.0190927	0.176875	0.134383	0.931274	0.433578	0.669556
269.943	5.50204	0.476799	0.231094	-0.816411	0.433448	0.699832	0.347277
119.089	5.5144	0.3095	0.222207	-0.136027	0.292276	0.441705	0.735123
223.937	5.51658	0.387633	0.0727906	-0.691138	0.521475	0.902924	0.422544
140.067	5.57755	0.693333	0.254602	-0.50581	0.165215	0.59027	0.453493
411.147	5.60243	-0.0695796	-1.00757	0.704109	0.794089	0.0044938	0.0895709
55.0552	5.60407	0.588224	0.256314	-0.374833	0.207184	0.566374	0.553516
72.0811	5.60944	0.197767	0.20468	-0.105497	0.50361	0.489258	0.798347
73.0841	5.61165	0.535891	0.241508	-0.382648	0.221701	0.566874	0.52227
291.951	5.71138	-0.174042	-0.202389	0.0404809	0.426255	0.358251	0.893761
138.054	5.79226	-0.102313	-0.354055	-0.0728529	0.691646	0.192449	0.841112
396.033	5.79723	-0.1698	-0.498406	0.0887941	0.457661	0.0512277	0.780267
440.025	5.82528	-0.254825	-0.563467	0.142378	0.162746	0.00936689	0.560424
338.016	5.87312	-0.0599708	-0.309072	0.155077	0.807633	0.230758	0.657626
247.016	5.98163	0.53328	0.219437	-0.262689	0.158732	0.540342	0.603
135.002	6.0025	0.285096	0.114992	-0.100873	0.340298	0.693297	0.806145
231.989	6.03335	0.144017	-0.000189613	-0.117793	0.606418	0.999454	0.764411
216.019	6.08797	0.177387	-0.0888613	-0.234585	0.603687	0.793496	0.626998
357.961	6.08823	0.0862091	0.0312499	-0.273901	0.775057	0.917305	0.525293
215.016	6.09499	-0.166314	-0.14638	0.0103913	0.482444	0.534981	0.974839
415.918	6.09542	0.346701	0.079994	-0.401631	0.297658	0.803655	0.3882
580.916	6.10235	-0.198183	-0.140932	-0.286853	0.527257	0.650924	0.517861
393.936	6.10235	0.259541	-0.00175342	-0.296797	0.363056	0.994961	0.457913
333.982	6.10339	-0.109392	-0.0570014	-0.154471	0.673466	0.825471	0.673925
447.991	6.10339	0.122863	0.109719	-0.365875	0.706227	0.736177	0.434531
426.009	6.10443	-0.132568	0.0577992	-0.262044	0.576669	0.806125	0.43957
113.02	6.10556	-0.134929	0.0770059	0.132639	0.559784	0.737375	0.683498
469.973	6.10869	0.179849	0.0614306	-0.341498	0.6345	0.870162	0.525704
112.677	6.10982	0.403117	0.15627	-0.285853	0.347264	0.708788	0.630081
244.093	6.11116	0.138053	-0.0290136	-0.0999211	0.701474	0.935493	0.843915
233.982	6.11995	-0.130159	0.111798	0.00962513	0.584607	0.637817	0.97697
285.483	6.12169	-0.0778668	0.0416086	-0.118216	0.86467	0.927386	0.854849
309.049	6.12363	-0.406651	0.114665	0.355064	0.120888	0.637737	0.315229
437.973	6.12363	-0.344543	-0.287488	-0.0993309	0.249528	0.330479	0.806557
263.491	6.12812	0.0382472	0.0476211	-0.252065	0.929513	0.912313	0.681768
324.014	6.12936	-0.224564	0.197444	0.019412	0.482654	0.535588	0.965212
515.906	6.13043	0.0883443	-0.0087518	-0.302428	0.742117	0.973904	0.43346
335.978	6.13138	-0.408042	-0.115689	0.100262	0.068152	0.566706	0.723749
336.982	6.13138	-0.181373	-0.0978503	-0.0601077	0.451111	0.680379	0.857352
277.497	6.13233	-0.310843	-0.00439266	0.1788	0.162588	0.983192	0.549011
188.984	6.13347	0.104184	0.067902	-0.0889489	0.771578	0.849691	0.860631
234.989	6.13347	-0.11207	0.0755068	0.0228542	0.65128	0.759879	0.947691
307.024	6.1346	-0.0530805	-0.114118	-0.00824642	0.839558	0.664895	0.982232
325.02	6.1346	-0.0098203	0.165259	-0.0579121	0.976742	0.626401	0.903285
205.028	6.13812	-0.155029	0.0482499	0.201624	0.514095	0.837056	0.547631
155.028	6.14229	-0.326125	0.108917	0.301764	0.305655	0.724226	0.494347
155.529	6.14229	-0.205376	0.0883093	0.257432	0.523651	0.781609	0.570821
255.502	6.14293	-0.178945	-0.121267	0.110047	0.409173	0.571347	0.714748
133.031	6.30269	-0.0458758	0.152151	-0.140986	0.885057	0.633927	0.754017
150.058	6.30535	-0.225984	0.124181	-0.0120914	0.3884	0.62974	0.973319
149.598	6.30943	0.255468	0.186869	-0.349772	0.587081	0.689871	0.598833
152.054	6.31522	0.0536419	0.127954	-0.210346	0.882369	0.725012	0.683035
172.039	6.3334	0.309062	0.262398	-0.400632	0.449002	0.51821	0.486429
194.021	6.33741	0.49398	0.286339	-0.480046	0.295169	0.534355	0.463603
144.101	6.40203	-0.224949	-0.232187	0.304079	0.466012	0.452292	0.485287
143.661	6.41023	0.305712	-0.106524	-0.206267	0.509229	0.815835	0.750182
171.025	6.46438	0.272146	0.0736503	-0.429987	0.532601	0.864299	0.487039
161.134	6.57185	0.20631	-0.203714	-0.260399	0.42805	0.433654	0.47755
160.132	6.58328	-0.0595979	-0.231046	-0.0398514	0.670083	0.12485	0.839625
159.643	6.58473	0.412699	-0.161336	-0.458783	0.303219	0.678456	0.412286
204.123	6.59173	-0.177285	-0.0763563	0.227101	0.356108	0.684286	0.400927
203.496	6.59173	0.385367	-0.0051196	-0.198278	0.284726	0.988221	0.687564
348.071	6.68197	0.237717	-1.56888	3.82266	0.843488	0.215198	0.0489937
152.031	6.95708	0.049463	0.168742	0.0205527	0.908667	0.696848	0.973101
191.017	7.14599	-0.0822165	-0.162805	0.184509	0.84931	0.707704	0.763442
169.035	7.15299	-0.442468	-0.354166	0.459827	0.306232	0.407161	0.445091
141.015	7.38448	-0.793345	-0.774639	0.293723	0.296761	0.307526	0.777568
231.084	7.56082	0.0224958	-0.469955	0.020335	0.933088	0.1079	0.957195
447.69	7.56082	0.126989	0.277628	-0.198258	0.480543	0.14444	0.437718
278.573	7.58432	0.0670027	-0.363137	0.275524	0.905416	0.524944	0.730607
556.133	7.61842	0.308442	-0.129942	-0.0695349	0.579609	0.813962	0.928938
126.65	7.66083	0.722489	-0.0471217	-1.00796	0.147202	0.919216	0.152047
158.113	7.671	0.293535	0.00523656	-0.00704507	0.228279	0.982001	0.982877
262.014	7.6878	0.344558	0.122034	-0.85318	0.349336	0.733896	0.119974
341.509	7.68857	-0.300349	0.0336212	-0.373046	0.339541	0.912286	0.398442
127.036	7.69057	0.0796936	0.0573117	-0.479038	0.705491	0.785317	0.134481
429.611	7.70234	-0.358663	-0.796472	0.162775	0.681894	0.372687	0.894834
334.542	7.70391	0.542313	-0.463058	-0.14313	0.27629	0.347673	0.832851
333.539	7.70498	0.47011	-0.32948	-0.207763	0.36813	0.522661	0.773257
308.584	7.70503	0.0622734	-0.643249	0.319889	0.904437	0.23641	0.664579
307.084	7.71019	-0.373256	-0.686323	0.652053	0.341378	0.0999409	0.246798
307.585	7.71019	-0.225645	-0.67388	0.544856	0.611249	0.152886	0.3929
308.084	7.71019	-0.182037	-0.636886	0.478266	0.677749	0.169881	0.446286
615.159	7.71019	0.0513844	-0.458938	0.155473	0.919457	0.378586	0.828925
635.141	7.71019	0.278645	-0.246345	0.0851695	0.49187	0.542063	0.880149
651.11	7.71578	0.228953	-0.486505	0.182242	0.572483	0.246507	0.74901
614.162	7.72141	-0.0375071	-0.483863	0.284333	0.9383	0.332958	0.679831
613.159	7.72747	-0.219669	-0.531587	0.446176	0.623664	0.251963	0.48459
154.083	7.72888	0.537668	0.305951	-0.492522	0.0410127	0.203615	0.153697
174.159	7.72929	0.0736203	-0.179448	-0.0663676	0.620939	0.245376	0.751445
484.115	7.7303	0.0990351	-0.569575	0.216007	0.846015	0.281916	0.764932
636.143	7.73071	0.41192	-0.159168	-0.0681283	0.375122	0.726076	0.915244
657.123	7.73112	0.398462	-0.288623	-0.0786991	0.317204	0.46191	0.885253
175.163	7.73137	0.342339	-0.123997	-0.319538	0.245792	0.662148	0.432423
86.0963	7.73137	0.160614	0.19732	-0.212561	0.310746	0.220377	0.340879
134.106	7.73163	0.47344	0.196111	-0.453241	0.133863	0.509148	0.291548
132.101	7.73173	-0.0872179	0.16276	-0.0289142	0.606322	0.346207	0.903053
133.104	7.73173	0.214431	0.200476	-0.261351	0.227266	0.256238	0.292365
85.8362	7.73173	0.660937	0.254784	-0.687725	0.108247	0.505606	0.220138
131.699	7.74465	0.449455	0.2141	-0.41341	0.123625	0.43616	0.295569
154.046	7.78376	0.155202	-0.345697	-0.187395	0.701787	0.402401	0.743405
203.972	7.78395	0.35638	0.0815357	-0.572329	0.213189	0.764889	0.16311
241.018	7.7853	0.380624	0.00134487	-0.393284	0.174005	0.995922	0.30737
135.649	7.79842	0.637057	0.217901	-0.642188	0.196928	0.643109	0.34511
119.047	7.81208	0.287767	0.158903	-0.570957	0.463506	0.681959	0.311585
164.552	7.83863	0.753214	0.41655	-0.972233	0.112203	0.352642	0.142045
182.081	7.83871	-0.0857991	0.201567	-0.286844	0.674089	0.335259	0.33242
165.054	7.83871	0.126424	0.243625	-0.451184	0.60417	0.32883	0.210408
136.074	7.83871	0.15008	0.14297	-0.264036	0.604997	0.621928	0.521908
181.524	7.83871	0.471305	0.282378	-0.731725	0.249038	0.477715	0.209503
123.043	7.83872	0.372791	0.249634	-0.675439	0.311972	0.490479	0.204156
233.116	7.84147	0.78019	0.431335	-0.670221	0.0141607	0.122499	0.0943834
153.04	7.85983	-0.29423	-0.263625	-0.185945	0.755176	0.779812	0.888896
344.127	7.86592	0.287101	0.14169	-0.692103	0.408602	0.678292	0.17547
226.042	7.8663	0.937448	0.319771	-0.802701	0.0574369	0.471158	0.216307
197.005	8.05785	0.00388295	0.290961	-0.359026	0.992662	0.497292	0.552281
276.144	8.06198	0.454304	0.315166	-0.690852	0.178482	0.33617	0.151422
294.155	8.06713	0.367708	0.338607	-0.682625	0.22608	0.261655	0.123449
268.105	8.16128	-0.0889173	-1.82614	2.94611	0.934113	0.117874	0.0806869
269.101	8.18793	-0.13238	-0.727825	1.34589	0.906072	0.521977	0.406802
348.177	8.18943	0.467495	0.180175	-0.573238	0.0772792	0.457281	0.116971
196.473	8.2928	0.173848	0.390517	-0.0869264	0.282885	0.0323133	0.69466
293.698	8.29513	-0.017997	0.451881	0.152977	0.938955	0.0825148	0.647506
396.728	8.34941	0.558168	0.498229	-0.28975	0.015212	0.0252315	0.291595
257.493	8.34952	-0.210555	0.429483	0.366801	0.592394	0.288324	0.511605
385.735	8.34952	-0.154849	0.41968	0.283616	0.667379	0.261203	0.579361
257.827	8.34952	-0.0349932	0.444309	0.191927	0.906149	0.160917	0.649582
386.737	8.34952	0.38179	0.492494	-0.194125	0.0322741	0.0102792	0.379558
386.234	8.35117	0.250571	0.44761	-0.0999153	0.147713	0.0210661	0.663385
251.489	8.35117	0.415556	0.439203	-0.214311	0.031581	0.0251076	0.370683
219.141	8.35437	0.0106543	-0.0198329	-0.061413	0.979773	0.962359	0.91772
218.139	8.35753	-0.268281	-0.0351865	0.141693	0.517102	0.931363	0.80659
217.472	8.3749	0.229929	0.0189608	-0.219377	0.642685	0.969265	0.75336
284.098	8.38958	0.0249179	-0.910308	0.984027	0.975781	0.285602	0.407268
137.045	8.40223	-0.355847	-0.606739	0.493697	0.806283	0.676999	0.809872
266.488	8.48715	-0.705542	-0.476918	0.91509	0.00363613	0.0252909	0.00584603
265.817	8.48892	-0.789636	-0.528418	0.98964	0.00608079	0.038525	0.0112702
398.723	8.48892	-0.209551	-0.42366	0.333229	0.396909	0.107975	0.343694
173.077	8.54217	1.65722	-0.0742432	-0.0862265	0.00105703	0.82848	0.858714
335.923	8.5444	0.0271403	0.252675	-0.325002	0.92619	0.399423	0.441641
447.563	8.54833	0.304252	0.256959	-0.614527	0.320867	0.397564	0.169152
262.165	8.55695	0.137671	-0.142963	-0.0389554	0.606022	0.592494	0.917116
100.111	8.6189	0.406468	0.0411269	-0.226973	0.427716	0.934712	0.749968
491.469	8.64193	0.775	0.437036	-0.513317	0.106043	0.334444	0.418466
655.171	8.67798	0.54481	-0.573416	0.21542	0.245177	0.223338	0.734897
407.716	8.70663	0.212383	0.000857091	-0.432065	0.832613	0.999318	0.761465
406.713	8.7281	-0.0809232	-0.240282	-0.281867	0.937439	0.816005	0.846868
362.508	8.73237	-0.309685	-0.0426736	0.0384819	0.00474237	0.608351	0.742591
362.834	8.73633	-0.0156755	0.0295998	-0.235013	0.92912	0.866698	0.359001
481.9	8.75332	0.300747	0.152133	-0.163809	0.03973	0.249756	0.372379
481.568	8.75332	0.0594613	0.157436	0.0988929	0.786294	0.479082	0.750062
272.388	8.75658	-0.0554191	0.0370355	-0.131726	0.750088	0.831127	0.594624
175.032	8.75718	0.433501	0.135589	-0.525982	0.122181	0.603506	0.176393
281.834	8.76804	0.648278	0.308333	0.000924245	0.140894	0.459418	0.998726
136.036	8.79172	0.694516	0.152212	-0.731595	0.0781865	0.669862	0.171035
146.155	8.84585	0.73248	0.0573619	-0.500755	0.217704	0.919133	0.535896
514.704	8.87672	-0.0922133	-0.105665	0.0246909	0.649182	0.602951	0.930913
667.961	8.87672	-0.756349	-0.155687	0.615097	0.0453788	0.639013	0.210371
668.964	8.87672	-0.545435	-0.156858	0.480343	0.0495505	0.524855	0.187938
668.63	8.90225	-0.738167	-0.142592	0.622569	0.0581401	0.680791	0.22412
668.295	8.90255	-0.50953	-0.124138	0.397436	0.0420677	0.572253	0.219271
503.515	8.93022	0.341563	0.14439	-0.340049	0.145259	0.514398	0.288843
191.081	9.00038	-0.201028	-0.163863	0.513491	0.474774	0.557979	0.212589
334.675	9.0043	-0.295319	-0.580241	0.431849	0.187547	0.0221052	0.174545
334.175	9.01253	-0.407301	-0.589483	0.518114	0.0353997	0.00642113	0.0526154
532.599	9.05965	0.471569	1.04216	-0.42418	0.0620651	0.00137296	0.205337
315.514	9.13105	-0.149576	-0.339006	0.396095	0.437385	0.101087	0.164422
358.685	9.15798	0.448317	-0.242558	-0.0812735	0.0576977	0.265204	0.78374
369.672	9.15798	0.481507	-0.0996918	-0.128619	0.0719574	0.679188	0.70569
234.65	9.24591	-0.0342002	-0.258713	0.574625	0.912488	0.415843	0.214714
77.037	9.29758	0.464988	0.0605117	-0.661469	0.293645	0.887334	0.291006
167.088	9.29779	-0.0354034	0.111369	-0.146681	0.785877	0.402589	0.434309
168.09	9.29792	-0.27858	-0.42776	0.200613	0.369665	0.182533	0.641342
50.0168	9.298	0.672308	0.257221	-0.761426	0.130608	0.537336	0.214308
121.083	9.29816	0.131551	0.129961	-0.270185	0.490594	0.495693	0.324743
166.086	9.29816	-0.308785	0.0739634	0.067072	0.125099	0.692373	0.79914
120.08	9.29816	-0.136907	0.103808	-0.0619552	0.356157	0.479031	0.762038
149.059	9.29816	0.198073	0.121807	-0.311144	0.363718	0.570042	0.315949
103.053	9.29816	0.230449	0.123632	-0.371602	0.348971	0.608061	0.289519
165.578	9.29844	0.194656	0.145151	-0.32647	0.448603	0.568856	0.372383
119.715	9.32445	0.322934	0.148372	-0.417758	0.332691	0.648372	0.37323
889.395	9.32489	-0.796122	-0.249922	0.684948	0.0836024	0.552365	0.263752
889.895	9.32489	-1.01751	-0.285639	0.949393	0.0894509	0.602355	0.238208
310.123	9.37984	0.291817	0.109905	-0.662924	0.320127	0.700196	0.127051
328.139	9.40287	0.196658	0.145317	-0.598553	0.452057	0.575256	0.127325
628.314	9.40705	-0.373789	0.0809311	0.251719	0.130803	0.72495	0.445946
628.65	9.40705	-0.81059	0.0549265	0.718508	0.15121	0.917019	0.349057
628.985	9.40705	-0.429561	0.143915	0.259463	0.131167	0.588629	0.493079
671.168	9.40748	0.259035	-0.630787	0.0852419	0.620949	0.245804	0.907694
672.17	9.40792	0.489183	-0.497287	-0.012031	0.38708	0.379642	0.987698
304.833	9.4571	-0.650465	-0.515464	0.206782	0.084474	0.1573	0.669772
331.681	9.48487	-0.564694	-0.191041	0.451664	0.251601	0.686893	0.504416
248.58	9.49092	0.258368	-0.755582	0.403668	0.682584	0.249901	0.651817
339.664	9.51288	0.424969	1.07229	-0.530704	0.0277805	0.000142006	0.0452802
384.845	9.56593	0.361848	0.612172	-0.240123	0.021036	0.00128071	0.215913
311.124	9.5958	-0.11564	0.0886478	-0.0461814	0.603481	0.68944	0.88244
129.529	9.60941	-0.268817	-0.0167713	-0.268314	0.163468	0.926087	0.310374
242.1	9.60978	-0.10285	0.116364	-0.669856	0.613857	0.568979	0.0420114
220.118	9.61927	-0.0769794	0.0666918	-0.60197	0.655757	0.698881	0.0336632
414.691	9.6203	-0.249428	-0.205076	-0.05198	0.400232	0.485951	0.899072
312.125	9.62328	0.0715795	0.0849012	-0.179116	0.768642	0.727468	0.604894
316.834	9.63365	-0.243624	0.0392995	0.123336	0.0203177	0.65393	0.331735
486.103	9.64707	0.535317	-0.11811	-0.17196	0.166596	0.745713	0.738534
485.107	9.65355	0.362663	-0.166462	0.054931	0.226924	0.564622	0.891981
217.105	9.67085	1.41818	-0.138602	0.0640236	0.00150006	0.656795	0.883937
216.438	9.67085	2.00461	-0.0526698	-0.373261	0.0027228	0.913428	0.589345
297.145	9.7032	-0.446891	-0.223874	0.211892	0.122473	0.412194	0.578554
221.092	9.73065	0.272657	0.250507	-0.604515	0.0649121	0.0850095	0.0100375
444.578	9.81373	-0.332214	-0.510305	0.286305	0.262903	0.101501	0.483977
449.71	9.84417	-0.36716	-0.183733	0.162741	0.232892	0.536467	0.696445
322.509	9.89953	-0.210197	-0.471034	-0.165242	0.498224	0.150562	0.703632
346.484	9.90058	-0.262832	-0.499976	-0.063341	0.407369	0.134805	0.885234
328.511	9.91567	-0.879424	-0.533629	0.248501	0.0931755	0.280941	0.713311
492.764	9.9259	-0.766335	-0.489603	0.249908	0.0856969	0.245922	0.663345
411.681	10.0016	0.0916638	0.0273969	-0.0519296	0.369049	0.783261	0.71291
410.678	10.0093	-0.301048	0.0285368	0.270338	0.113352	0.870365	0.291701
302.88	10.0482	0.0809023	-0.0751908	-0.0849305	0.401424	0.43407	0.529166
282.912	10.0536	-0.186972	-0.188333	0.243847	0.137148	0.134686	0.166153
284.909	10.0536	-0.201637	-0.192702	0.266615	0.226527	0.24592	0.255451
298.884	10.0756	0.0812811	-0.139523	0.00591779	0.594086	0.368665	0.977907
168.895	10.0921	0.456089	-0.0751469	-0.411563	0.184975	0.817125	0.381769
166.898	10.0975	0.465298	-0.0498402	-0.442537	0.179475	0.878697	0.351477
232.155	10.1049	-0.842193	-0.406825	0.432062	0.173698	0.491225	0.602764
237.656	10.105	-0.429035	-0.070089	0.879895	0.336955	0.87162	0.176823
233.157	10.1085	-0.592757	-0.38612	0.244336	0.307024	0.497464	0.758623
231.442	10.1159	-0.214727	-0.372725	-0.0744552	0.722712	0.541258	0.930401
520.776	10.1236	-0.0458433	-0.0737162	0.0284855	0.894988	0.832062	0.953731
331.873	10.2257	0.0402669	-0.0992129	-0.0157009	0.609889	0.227159	0.887239
222.148	10.2426	0.265659	0.0599853	-0.674278	0.332906	0.821843	0.10155
355.678	10.2431	0.106502	0.0789426	0.0994415	0.454089	0.575838	0.617508
223.152	10.2441	0.478086	0.0593829	-0.818761	0.14006	0.843861	0.082593
307.429	10.2527	-0.193977	-0.202004	0.67833	0.154308	0.139984	0.00460799
417.219	10.2588	-0.0693879	0.0688476	0.10858	0.746666	0.748559	0.720966
694.696	10.2651	-0.115126	0.161338	0.0828699	0.60643	0.473949	0.791843
417.623	10.27	0.106996	0.110635	-0.0598633	0.710051	0.700748	0.882618
401.89	10.2787	-0.566551	-0.453525	0.242995	0.168213	0.259788	0.658105
521.023	10.2802	-0.370615	0.103066	0.327283	0.155911	0.674654	0.356696
521.524	10.2802	-0.540562	0.086295	0.523887	0.101346	0.775161	0.240329
417.422	10.2802	-0.47742	0.0808486	0.457064	0.1163	0.773159	0.267417
280.498	10.2831	0.6071	0.4607	-0.3382	0.0061128	0.0231383	0.183941
331.525	10.2957	0.0271831	-0.11284	0.0394816	0.846049	0.429255	0.841953
310.176	10.3055	0.309132	0.244268	-0.620441	0.457508	0.554502	0.300129
483.754	10.3368	-0.560234	0.0521028	0.14968	0.0586139	0.8427	0.688058
282.17	10.3368	0.149766	0.0799989	-0.250354	0.498502	0.714775	0.426369
285.691	10.362	0.0393309	0.291036	-0.155198	0.715134	0.0232547	0.322153
313.663	10.4969	-0.0117878	0.79867	0.112549	0.957209	0.00561709	0.718293
521.739	10.5042	-0.545656	0.345792	0.429084	0.146406	0.337894	0.397237
456.749	10.5209	0.0457999	0.367943	0.659024	0.911296	0.382655	0.275722
438.55	10.5539	-0.158806	0.0601316	0.135297	0.44536	0.768939	0.641665
304.173	10.5753	0.521608	-0.268558	0.239725	0.044125	0.254167	0.460394
440.998	10.576	0.375716	-0.125914	0.30309	0.203777	0.655163	0.452639
521.223	10.5819	-0.0498927	0.37985	-0.0933042	0.689848	0.0135806	0.599121
259.016	10.5848	0.73031	-0.0459884	-0.207882	0.0112598	0.841729	0.528206
238.415	10.5866	2.185	-0.221793	-0.392006	0.00812741	0.731867	0.669157
239.149	10.5866	1.76112	-0.122269	-0.0482257	0.0074865	0.81142	0.946853
298.098	10.5982	-0.154926	-0.338664	0.296355	0.464495	0.131659	0.329213
277.105	10.5986	1.40666	-0.0793416	-0.242186	0.0110689	0.857522	0.699491
315.681	10.599	-0.167695	-0.0528119	1.01893	0.63263	0.879527	0.0652955
261.132	10.6079	0.840689	-0.040742	0.0743631	0.00951023	0.873606	0.837417
260.328	10.6136	1.66622	0.0768291	-0.426691	0.00469748	0.86258	0.502611
262.135	10.6136	0.976245	-0.203532	0.06896	0.0149023	0.537536	0.881185
264.159	10.6157	0.18963	0.0205663	-0.215731	0.616157	0.956285	0.685892
250.144	10.6157	0.151359	0.0616267	-0.761626	0.69307	0.871786	0.183413
275.111	10.6226	-0.271697	-0.324818	0.169306	0.386962	0.305863	0.697394
474.174	10.679	0.748933	0.109998	-0.846255	0.0470566	0.739425	0.0978735
470.698	10.7021	-0.264054	0.281626	0.00382369	0.39289	0.363692	0.992849
367.16	10.7237	0.087042	0.139279	-0.337495	0.562046	0.361479	0.135844
482.01	10.7459	0.0531319	0.183965	0.0707713	0.834243	0.475545	0.843727
472.027	10.7635	-0.0434193	-0.1571	-0.296467	0.762728	0.291094	0.169915
677.351	10.7655	-0.258518	-0.224941	0.36136	0.26454	0.327017	0.269692
346.033	10.7751	0.757672	0.136575	-0.994528	0.0164118	0.600328	0.0228961
677.856	10.7756	-0.372166	-0.188991	0.489465	0.241056	0.538208	0.272815
559.754	10.7796	-0.272678	0.0766871	0.319599	0.31495	0.770712	0.400179
414.561	10.7987	-0.343231	-0.454489	-0.0290457	0.170522	0.0812694	0.930416
355.21	10.8504	0.12568	-0.0706824	-0.0823821	0.333653	0.578768	0.646209
354.213	10.8504	-0.100371	-0.158011	0.117828	0.169516	0.0447586	0.245477
144.174	10.8657	0.527408	0.0149422	-0.507722	0.104464	0.959899	0.247862
366.873	10.8862	-0.342171	-0.0339442	0.689665	0.114206	0.864773	0.0354454
549.801	10.8862	-0.223365	0.142003	0.398243	0.203336	0.404137	0.11885
367.543	10.8862	0.0468785	0.0335726	0.237761	0.795109	0.852308	0.363783
494.123	10.9169	0.388351	-0.023453	-0.536042	0.36374	0.955049	0.374765
409.188	10.9308	-0.0183012	0.398458	-0.510473	0.933245	0.0966281	0.126637
410.19	10.9308	0.104081	0.365662	-0.558915	0.471576	0.0290559	0.020863
470.135	10.9308	0.556436	-0.0286534	-0.253465	0.0487275	0.907751	0.475827
805.91	10.9379	-0.20903	-0.233522	0.301095	0.382372	0.332003	0.374041
870.288	10.94	0.486287	0.585066	-0.877422	0.00878511	0.00324288	0.00230907
281.61	10.946	0.737877	0.385876	-0.828968	0.0691705	0.304532	0.134171
117.057	10.9466	0.363561	0.212098	-0.631007	0.0441371	0.201425	0.0190519
405.199	10.952	0.282748	0.109101	-0.587838	0.145487	0.551094	0.0451949
207.102	10.952	0.120177	0.188622	-0.370243	0.268636	0.0990521	0.0321334
172.572	10.9533	0.499078	0.0911681	-0.55402	0.077236	0.720808	0.150282
189.073	10.9539	-0.134854	0.187985	-0.211926	0.458554	0.309309	0.412046
305.017	10.9575	0.156152	0.152242	-0.34539	0.2482	0.259266	0.0872665
206.1	10.9575	-0.18625	0.171834	-0.184597	0.359184	0.395695	0.514671
205.097	10.9575	-0.429696	0.142711	0.00934237	0.205091	0.659041	0.9836
188.071	10.9575	-0.375849	0.168462	-0.0390104	0.233346	0.579261	0.926944
159.091	10.9575	0.150197	0.185779	-0.466005	0.246995	0.160972	0.0254483
187.494	10.9575	0.194425	0.263049	-0.483273	0.14242	0.0588958	0.021171
188.511	10.9579	0.344591	0.313999	-0.570409	0.0990417	0.127519	0.0604917
204.468	10.9579	0.0571762	0.179978	-0.316968	0.634022	0.15794	0.0883834
146.059	10.9582	0.0747343	0.234923	-0.407409	0.568183	0.0982759	0.0509293
641.192	10.9582	-0.0172466	0.0808592	-0.570077	0.937329	0.713561	0.0945017
195.575	10.9591	0.46489	0.380852	-0.6996	0.106658	0.174824	0.0891658
905.456	10.9609	-0.548455	-0.289543	0.258677	0.279159	0.556988	0.708736
304.008	10.9643	0.301244	0.203943	-0.508689	0.0907357	0.229255	0.0508035
553.784	10.9843	-0.0881384	0.0509099	-0.140755	0.635039	0.78292	0.592712
142.07	10.9844	0.366184	0.128785	-0.606654	0.142102	0.582594	0.0928834
141.09	10.9936	0.324819	-0.0766549	-0.447571	0.28123	0.791999	0.292875
180.533	10.9936	0.966479	0.212149	-1.02819	0.0470253	0.620604	0.115693
271.842	11.0008	-0.672228	-0.46286	0.470095	0.00253133	0.017668	0.0649472
181.083	11.0034	0.190254	-0.0739123	-0.322057	0.348863	0.70916	0.267782
296.52	11.0383	-0.343518	-0.307898	0.262573	0.0665433	0.0935911	0.284409
443.773	11.0602	-0.192625	-0.114894	0.109671	0.185786	0.413065	0.576116
126.091	11.0679	0.456086	0.464005	-0.471982	0.0316458	0.0295034	0.0936588
126.59	11.0829	0.605265	0.834083	-0.612796	0.0202931	0.00407087	0.0725891
413.145	11.094	0.272943	0.0577924	-0.335899	0.0893471	0.693111	0.131103
414.141	11.0966	0.487579	0.0206643	-0.41411	0.0680805	0.931006	0.241132
616.33	11.1007	0.0684044	0.108262	-0.536895	0.823652	0.724959	0.237064
590.754	11.1059	0.121129	0.0901508	-0.448223	0.667918	0.748853	0.277535
299.664	11.1187	0.249714	0.0958049	-0.563777	0.536107	0.810378	0.332276
308.668	11.1252	0.314366	0.0123792	-0.491993	0.379667	0.971689	0.333592
727.885	11.1365	-0.287689	0.282874	-0.110509	0.257126	0.264541	0.748832
485.253	11.1448	-0.267616	0.0856462	-0.116296	0.122225	0.595332	0.60982
568.645	11.1464	-0.874763	-0.630483	0.302644	0.0983483	0.214558	0.659431
426.486	11.1464	-1.04256	-0.740611	0.479945	0.0699067	0.175736	0.515296
426.988	11.1507	-0.763409	-0.659017	0.228323	0.0868876	0.130672	0.690765
485.927	11.1555	-0.267671	0.0875681	-0.0386505	0.208335	0.666231	0.892325
485.593	11.1561	-0.625411	0.0628751	0.210485	0.0665069	0.836322	0.627007
426.735	11.1584	-1.01647	-0.667031	0.459233	0.07219	0.211337	0.52694
399.7	11.1881	-0.285828	-0.197161	0.265649	0.200016	0.363527	0.385493
452.75	11.2157	-0.796469	0.23749	0.648802	0.182897	0.675195	0.425332
301.663	11.2214	0.697077	0.209904	-0.934877	0.0581183	0.52454	0.0694309
412.552	11.2545	-0.244309	0.285252	0.466304	0.363642	0.293346	0.229804
272.665	11.3063	-0.37345	-0.330941	0.214916	0.0211733	0.0350445	0.278133
847.375	11.3204	-0.264036	0.411084	0.574393	0.381274	0.187135	0.191911
418.903	11.3283	-0.296041	-0.448566	-0.228631	0.321687	0.148154	0.579916
283.17	11.3663	1.19003	-0.263414	0.336525	0.0252018	0.560112	0.597889
306.162	11.3726	0.88783	-0.185612	0.249902	0.0197096	0.560341	0.578915
284.177	11.3775	1.37393	-0.106414	0.0166078	0.0115068	0.806957	0.978445
305.158	11.3778	0.767516	-0.190315	0.430146	0.0525177	0.588213	0.393716
321.132	11.3781	0.993844	-0.125809	-0.00435649	0.0224712	0.730282	0.993238
307.163	11.3982	0.970367	-0.154252	0.0459916	0.0132781	0.628352	0.918116
437.506	11.4002	-0.00701134	-0.126798	0.00706487	0.969644	0.497848	0.978368
308.185	11.405	0.400381	0.122371	-0.753036	0.2544	0.717209	0.141121
435.497	11.4124	-0.432258	-0.165544	0.269206	0.0462971	0.393394	0.329965
440.487	11.4181	-0.59963	0.0131347	0.349025	0.11932	0.970463	0.493308
655.751	11.4183	-0.367146	0.0663886	0.130991	0.153057	0.782538	0.700843
645.259	11.4183	0.0762181	0.0530722	-0.273105	0.598927	0.712919	0.202748
633.766	11.4183	-1.22986	-0.0541125	0.848217	0.137707	0.943934	0.444461
440.816	11.4183	-0.629918	-0.0563229	0.423798	0.130958	0.884138	0.446566
441.493	11.4204	-0.159057	-0.00994005	-0.0581305	0.12283	0.916813	0.66759
320.138	11.4228	0.0295369	-0.297387	0.0317064	0.900715	0.230935	0.924539
634.267	11.4228	-0.687866	-0.0673928	0.324832	0.113082	0.865946	0.568848
319.137	11.4228	-0.361367	-0.375247	0.342803	0.174265	0.160116	0.346493
660.721	11.4228	-0.50483	-0.00554875	0.187549	0.110773	0.984762	0.650251
645.762	11.4231	-0.818555	0.029326	0.500531	0.106517	0.949656	0.454387
634.769	11.4234	-1.16845	-0.0251796	0.801608	0.153995	0.973763	0.466883
644.757	11.4236	-1.27932	-0.188029	1.12939	0.153175	0.822396	0.353398
653.244	11.4277	-0.051073	0.0568924	-0.334194	0.680681	0.647085	0.0836401
635.27	11.4279	-0.225526	-0.00895296	-0.00219794	0.133932	0.94884	0.991112
736.315	11.4326	0.00287705	0.333588	-0.315209	0.985037	0.0551253	0.172262
652.735	11.4332	-0.59569	-0.0310101	0.311476	0.166704	0.938827	0.589227
660.232	11.4338	-0.358562	0.0987448	0.0722569	0.144667	0.668012	0.823615
287.663	11.4449	0.467096	0.21086	0.0352416	0.12813	0.465631	0.930087
661.7	11.4477	-0.333894	0.0790125	0.253767	0.119163	0.690524	0.375833
661.251	11.4527	0.0854153	0.0923677	-0.211635	0.318339	0.283077	0.0992672
130.158	11.4816	0.204272	-0.245907	-0.242968	0.388151	0.303925	0.464828
366.696	11.4879	0.347785	0.331314	-0.100858	0.0946544	0.108633	0.707674
527.925	11.4899	-1.10433	0.193941	0.741165	0.0688497	0.721742	0.347965
528.59	11.4926	-0.834419	0.221476	0.543382	0.08673	0.61841	0.394993
527.591	11.4926	-1.02134	0.184008	0.699158	0.0707667	0.717187	0.342809
528.258	11.4928	-0.392649	0.217442	0.0901891	0.163272	0.419933	0.809371
395.948	11.4967	0.268888	0.18902	-0.459359	0.480159	0.616773	0.397152
283.83	11.5089	0.626237	0.284929	-0.0334489	0.0718767	0.373161	0.939513
791.383	11.5091	-0.401027	0.280093	0.124778	0.192275	0.349087	0.762075
425.741	11.511	0.357207	0.312525	0.117129	0.256875	0.316599	0.784297
732.363	11.5188	0.101198	0.15133	-0.23247	0.301372	0.137124	0.11047
653.639	11.5188	-0.646395	0.291324	0.687238	0.221409	0.566589	0.34798
654.639	11.5218	-0.403091	0.307954	0.504634	0.363032	0.482246	0.418033
493.909	11.5218	-0.737987	0.116084	0.846261	0.130065	0.797428	0.208503
654.299	11.5218	-0.0466688	0.293709	0.114438	0.69984	0.0360623	0.507904
494.58	11.5238	-0.468673	0.136361	0.570792	0.164889	0.668291	0.224506
654.978	11.5297	0.0428067	0.221194	0.106503	0.658793	0.0453038	0.4432
494.245	11.5424	-0.170822	0.0592916	0.275842	0.366146	0.74806	0.305881
503.959	11.5472	0.382159	0.394567	-0.443326	0.0682073	0.0613148	0.122214
653.969	11.5473	-0.350313	0.311799	0.43011	0.293771	0.346567	0.357896
740.347	11.5542	-0.124084	0.219424	0.229599	0.51146	0.259013	0.394926
658.957	11.5575	-0.835486	-0.138073	0.423084	0.0100361	0.594648	0.264244
741.348	11.569	0.0671997	0.251446	0.0622659	0.674564	0.141679	0.782533
166.047	11.5702	0.455554	-0.188131	-0.429904	0.283368	0.647547	0.464904
432.723	11.5747	-0.654513	-0.0891306	0.419558	0.0330368	0.735216	0.277308
431.726	11.5801	-0.892494	-0.172056	0.471557	0.015255	0.56981	0.283954
635.615	11.5886	-0.218844	0.254235	0.242183	0.0744875	0.0444253	0.147315
994.117	11.5918	-0.549699	0.152108	1.12379	0.336419	0.784386	0.177594
160.169	11.5935	0.94348	-0.187202	-1.06022	0.180553	0.778396	0.27732
828.263	11.5972	-0.45693	-0.0691177	0.887511	0.331184	0.879535	0.193174
605.663	11.6021	-0.27238	0.157221	0.362917	0.114313	0.336289	0.133548
234.149	11.6044	0.247758	0.173551	-0.68531	0.452335	0.595148	0.160915
666.295	11.6069	0.0308844	0.186282	-0.0192099	0.823704	0.202406	0.921843
235.153	11.6088	0.536434	0.146232	-0.924662	0.198916	0.712555	0.126192
464.95	11.6104	-0.0212597	0.130555	0.143707	0.86833	0.323868	0.436925
716.305	11.6125	0.768059	0.218139	-0.794034	0.0492184	0.529135	0.128889
658.625	11.6171	-0.932382	-0.125699	0.281295	0.00843501	0.652343	0.480226
370.748	11.6171	-0.0723672	0.186904	0.196086	0.667308	0.282459	0.417503
666.662	11.6177	-0.0176777	-0.0359705	0.196467	0.878732	0.756774	0.250829
371.373	11.6193	-0.288234	0.0518236	0.794798	0.165292	0.790626	0.0176737
456.46	11.6244	-0.114099	0.46052	0.273512	0.672275	0.114357	0.478083
926.873	11.6249	-0.220615	0.349525	0.448534	0.453211	0.246967	0.28988
711.658	11.6249	0.0742871	0.120291	-0.0698696	0.75118	0.609536	0.832678
677.992	11.6256	0.138436	0.0889872	-0.10066	0.358698	0.548796	0.630092
681.654	11.626	-0.578607	0.191704	0.336053	0.425081	0.787732	0.738885
671.65	11.6265	-0.321809	0.0366096	0.190251	0.218133	0.882914	0.59164
459.953	11.6272	-0.420899	0.116523	0.512733	0.0702659	0.579183	0.109831
677.306	11.6272	0.150964	0.119062	-0.135506	0.158889	0.255319	0.352983
682.656	11.6275	-0.425619	0.193215	0.220643	0.476967	0.743559	0.791405
704.309	11.6276	0.151952	0.12369	-0.0317439	0.279171	0.372351	0.868105
681.987	11.628	-0.18967	0.22135	-0.0524304	0.705664	0.659917	0.940884
460.456	11.628	-0.0491157	0.300015	0.228014	0.833627	0.221569	0.496469
667.306	11.6285	0.117176	0.0691084	-0.0975266	0.392507	0.608488	0.609237
682.98	11.6285	-0.181248	0.300476	-0.0750643	0.693824	0.517655	0.907791
687.316	11.6285	0.166483	0.00725931	-0.209988	0.184833	0.951104	0.231728
682.319	11.6291	-0.0242983	0.195059	-0.230393	0.942282	0.565283	0.629937
462.948	11.6291	-0.109577	0.0103005	0.258605	0.41147	0.937085	0.186205
598.755	11.6292	-0.70568	0.297416	0.875648	0.196121	0.568673	0.25101
448.82	11.6292	-0.44531	0.307044	0.593886	0.21568	0.381042	0.240506
450.215	11.6292	-0.50084	0.352203	0.592491	0.147981	0.292782	0.217218
450.718	11.6292	-0.64677	0.369447	0.764777	0.221941	0.471012	0.300305
473.967	11.6295	0.536932	0.155975	-0.350112	0.0589207	0.540487	0.339936
462.452	11.6295	-0.60903	0.105583	0.663908	0.09331	0.749745	0.180269
455.967	11.6299	0.0857978	0.339078	0.0275473	0.478533	0.0187745	0.870172
709.657	11.6299	-0.397962	0.023401	0.557324	0.175451	0.932494	0.179222
599.617	11.6299	-1.71991	0.21902	1.71664	0.155932	0.846889	0.30113
600.285	11.6299	-1.18582	0.220505	1.12657	0.14151	0.769391	0.305073
449.964	11.6299	-0.646342	0.350361	0.747371	0.157629	0.422634	0.238209
600.953	11.6299	-1.20858	0.2436	1.29892	0.158021	0.76164	0.270595
450.466	11.6299	-0.774409	0.364216	0.878751	0.17413	0.502854	0.265615
606.943	11.6299	-1.06743	0.267346	1.16513	0.190514	0.729446	0.301724
607.277	11.6299	-0.408403	0.210756	0.515824	0.129145	0.408076	0.16925
455.461	11.6299	-0.485411	0.38207	0.645209	0.184372	0.285918	0.209287
455.71	11.6299	-0.332657	0.402504	0.4588	0.23396	0.157927	0.24473
898.921	11.6312	-1.47	0.349087	1.52312	0.172773	0.731411	0.304653
601.282	11.6312	-0.290647	0.235174	0.417617	0.138932	0.220278	0.133535
612.932	11.6312	-0.594241	0.125825	0.725133	0.251782	0.800275	0.317601
666.981	11.6312	0.0601258	0.175464	-0.125305	0.723387	0.315841	0.603693
464.445	11.6312	-0.237136	0.214912	0.259158	0.423773	0.466858	0.533072
599.952	11.6319	-1.71993	0.21933	1.83415	0.148098	0.843347	0.261879
899.423	11.6319	-1.36908	0.324165	1.41733	0.165761	0.727383	0.296673
600.62	11.6319	-1.36383	0.213503	1.39708	0.162498	0.815737	0.297477
597.754	11.6319	-0.850268	0.288304	0.992433	0.184712	0.635834	0.265227
598.089	11.6319	-0.321283	0.251528	0.454211	0.148256	0.245708	0.148374
598.42	11.6319	-0.26238	0.331104	0.358937	0.224303	0.135091	0.23843
925.88	11.6319	-0.54333	0.363092	0.600465	0.252723	0.433977	0.363645
926.381	11.6319	-0.358211	0.286113	0.487198	0.304135	0.406036	0.321808
896.625	11.6319	-0.38353	0.334447	0.549037	0.185813	0.242445	0.181054
667.65	11.6338	-0.122331	0.0457019	0.0724988	0.555382	0.82393	0.802998
677.649	11.6338	-0.221366	0.150256	0.0568322	0.34982	0.519325	0.861434
312.192	11.6338	0.241617	0.4458	-0.823644	0.621468	0.371135	0.250884
910.41	11.6338	-0.277645	0.265979	0.408523	0.287742	0.307066	0.270089
617.589	11.6338	-0.967843	0.12431	0.986697	0.183048	0.85615	0.324061
607.611	11.6338	-0.736144	0.195681	0.848724	0.172386	0.700808	0.256618
463.442	11.6338	-0.572817	0.11701	0.643404	0.149379	0.752926	0.240857
617.923	11.6338	-0.856247	0.135797	0.881949	0.184965	0.82383	0.321615
463.192	11.6338	-0.215308	0.16973	0.211478	0.159959	0.256797	0.313359
463.694	11.6338	-0.562277	0.180609	0.625385	0.149412	0.622294	0.245139
459.451	11.6338	-1.02444	0.0896308	1.1481	0.176236	0.899934	0.273552
459.702	11.6338	-0.516033	0.103071	0.653528	0.182193	0.777875	0.227142
463.945	11.6338	-0.38099	0.188559	0.476969	0.229841	0.538006	0.283083
360.378	11.6342	-0.00811017	0.273884	0.201179	0.953802	0.0782316	0.325074
925.379	11.6342	-0.371762	0.249812	0.453601	0.18312	0.356113	0.244084
370.961	11.6342	-0.0141668	0.150446	0.165815	0.897898	0.197189	0.304888
691.329	11.6346	0.104105	0.198289	-0.300708	0.617605	0.351574	0.319809
685.655	11.6346	-0.232487	0.192068	0.254951	0.521514	0.594849	0.61727
618.255	11.6347	-0.229072	0.135232	0.276012	0.200695	0.43425	0.268885
601.603	11.6347	-0.464793	0.28239	0.639326	0.210367	0.432007	0.221911
616.914	11.6347	-0.473246	0.178653	0.591351	0.283846	0.675993	0.339815
672.977	11.6365	-0.239098	0.119577	0.149314	0.508242	0.738038	0.767578
460.955	11.6365	-0.258162	0.105085	0.374942	0.14651	0.531138	0.137277
676.316	11.6386	-0.120252	1.78282e-05	0.0517458	0.303902	0.999874	0.746764
686.659	11.6395	-0.255162	0.146038	0.154999	0.562328	0.738327	0.801722
616.59	11.6405	-0.17492	0.142347	0.125666	0.312831	0.406284	0.599183
695.991	11.6444	-0.140801	0.187522	0.00464952	0.601893	0.490129	0.990193
461.458	11.6444	-0.186275	0.0810529	0.228055	0.409323	0.71467	0.472623
658.283	11.6447	-0.178282	-0.0888613	-0.523356	0.539199	0.757389	0.219748
687.661	11.6447	-0.225689	-0.0758496	0.183965	0.411869	0.778497	0.631232
694.988	11.645	-0.236621	0.117403	0.408394	0.467855	0.715162	0.37952
918.88	11.645	-0.128326	0.210853	0.430176	0.573713	0.363429	0.201918
462.695	11.645	-0.0362473	0.434342	0.0135483	0.790535	0.0110021	0.943912
688.002	11.645	0.0881974	-0.00689564	-0.312154	0.486027	0.955866	0.105001
680.65	11.645	0.0114296	0.0784131	0.111327	0.922154	0.508604	0.506993
614.605	11.645	-0.544861	0.0222105	0.738519	0.190896	0.954981	0.208052
617.254	11.6451	-0.277976	0.144738	0.295646	0.219009	0.507056	0.345207
695.658	11.6451	-0.188289	0.052111	0.235429	0.604473	0.885081	0.646349
705.996	11.6452	0.0203983	0.113303	-0.117452	0.923111	0.595217	0.69572
618.594	11.6455	-0.345489	0.125439	0.405703	0.267795	0.676857	0.351661
686.321	11.6479	0.0514019	0.147004	-0.135219	0.834689	0.554626	0.698876
697.973	11.6491	-0.213498	0.226249	0.222255	0.500802	0.476367	0.617825
716.977	11.6491	-0.142861	0.0592113	0.275016	0.617355	0.834852	0.499402
665.618	11.6494	-0.906962	-0.0846243	0.252776	0.0221977	0.79851	0.592472
986.422	11.6494	-1.6455	-0.16154	0.539871	0.0299579	0.802434	0.558006
688.636	11.6495	-0.199675	-0.0630951	0.259316	0.354002	0.763831	0.392659
700.996	11.6495	-0.360129	0.0521303	0.338354	0.462885	0.913889	0.622353
657.62	11.6497	-1.31389	-0.190362	0.508849	0.0191706	0.682978	0.446393
367.969	11.6504	0.162417	0.219878	-0.0722368	0.294591	0.167413	0.733413
629.574	11.6507	-0.155668	0.231331	0.226664	0.497583	0.321881	0.485331
900.408	11.6507	-0.94589	0.327297	1.12065	0.18015	0.625067	0.253545
607.936	11.6507	-0.851978	0.200968	0.946961	0.190841	0.744716	0.293936
699.31	11.6514	0.306344	0.179063	-0.253857	0.00869398	0.0784689	0.0778666
266.138	11.6517	0.464099	-0.0124591	-0.776807	0.138091	0.965809	0.0870218
710.998	11.6526	-0.162917	0.222695	0.146797	0.599467	0.476235	0.736564
699.996	11.6529	0.046262	0.00360931	0.084939	0.842472	0.987613	0.796576
681.304	11.6531	-0.0317385	-0.0474367	0.0224292	0.847707	0.774415	0.923479
613.599	11.6531	-0.426718	0.198161	0.46585	0.222652	0.556264	0.33728
696.323	11.6531	0.154002	0.155966	-0.281567	0.442442	0.436865	0.326729
664.942	11.6539	-1.16549	-0.236012	0.499615	0.0193373	0.570847	0.40216
464.197	11.6544	0.169961	0.100369	-0.0938413	0.224663	0.459465	0.621312
690.995	11.6545	-0.0411568	0.155562	-0.0446484	0.897119	0.627525	0.920972
696.66	11.6545	-0.43827	0.0741266	0.437969	0.3727	0.877077	0.52342
699.656	11.6545	-0.100199	0.00385495	0.173869	0.725957	0.989197	0.667775
686.996	11.6545	-0.0295336	0.13187	-0.0984635	0.916529	0.642063	0.805162
728.652	11.655	-0.345556	-0.0377266	0.434024	0.114273	0.85139	0.15411
680.986	11.6559	-0.439037	0.235102	0.449204	0.316693	0.583098	0.461936
657.953	11.6559	-1.3709	-0.186856	0.477373	0.0264125	0.720847	0.52248
688.987	11.656	0.0484337	0.103469	-0.119601	0.811274	0.612323	0.677879
700.317	11.6564	0.225759	0.124981	-0.21776	0.224298	0.486727	0.395263
705.319	11.6564	0.263812	0.151972	-0.221983	0.0382437	0.191324	0.178642
697.647	11.6564	-0.176363	0.0250151	0.166689	0.163798	0.833302	0.33554
725.66	11.6564	0.00231268	0.162872	0.11945	0.99115	0.443586	0.686985
729.674	11.6564	-0.216148	0.211909	0.209299	0.287408	0.2963	0.457671
714.659	11.6565	-0.176737	-0.0436092	0.257468	0.392774	0.829217	0.379359
705.666	11.6565	-0.00323436	0.138443	0.00596846	0.992323	0.682108	0.989983
612.265	11.6565	-0.315821	0.141017	0.391049	0.245805	0.591335	0.304767
706.66	11.6565	-0.17502	0.0397737	0.203422	0.530745	0.885327	0.604919
613.941	11.6565	-0.120143	0.150291	0.283209	0.387664	0.286179	0.16633
691.997	11.6565	-0.266352	0.0281999	0.236428	0.537273	0.94727	0.696411
698.992	11.6565	0.070823	-0.0520509	-0.00556078	0.780646	0.837647	0.987633
742.656	11.6569	-0.18491	0.13244	0.207857	0.418611	0.558313	0.517025
663.96	11.6569	-0.116715	0.0649225	0.0711023	0.543602	0.733338	0.791598
701.318	11.6569	0.318175	0.153375	-0.384495	0.0906513	0.380982	0.138911
704.672	11.657	0.120074	0.216543	0.0678687	0.630524	0.393534	0.846589
691.664	11.657	-0.265493	0.154323	0.093895	0.570828	0.740048	0.886159
700.663	11.657	-0.00359913	0.0953245	-0.125671	0.987868	0.688697	0.70861
692.314	11.6574	0.122027	-0.0234234	-0.113931	0.429782	0.877138	0.598
714.996	11.6574	-0.298968	0.1782	0.208995	0.376208	0.591811	0.655606
710.661	11.6574	-0.216047	0.194426	0.206414	0.340976	0.388872	0.513317
685.988	11.6574	-0.525022	0.119881	0.57155	0.286143	0.800719	0.40465
712.977	11.6575	-0.200349	0.0689668	0.224806	0.377406	0.755944	0.479631
743.658	11.6575	-0.151011	-0.0358156	0.331406	0.224449	0.762832	0.075316
723.656	11.658	-0.114066	0.181314	0.219025	0.463081	0.255439	0.325997
690.308	11.6586	0.159314	0.0372419	-0.088352	0.228276	0.768158	0.622731
718.994	11.659	0.00835504	0.103387	-0.0514027	0.955963	0.50081	0.810488
696.987	11.6599	-0.19231	0.0751489	0.169064	0.528999	0.803564	0.693235
716.654	11.6606	-0.0611928	-0.0320399	0.131209	0.749219	0.866753	0.629389
740.663	11.6615	-0.0999241	0.0291324	0.240762	0.576985	0.869609	0.35092
698.645	11.6615	0.0631417	0.22444	-0.0803142	0.663376	0.146915	0.695102
481.707	11.6623	-0.261657	0.0690149	0.194487	0.0566573	0.573323	0.275711
720.326	11.6623	0.287953	0.134673	-0.173058	0.0162184	0.193712	0.233349
692.653	11.6623	0.0560689	-0.0491957	-0.0683388	0.779064	0.805453	0.808824
721.665	11.6623	-0.150029	0.0111624	0.173065	0.244682	0.927866	0.335717
733.66	11.6623	-0.350353	0.0723265	0.314526	0.078152	0.68775	0.23581
689.644	11.6623	0.1	0.265675	-0.267571	0.585045	0.169137	0.31316
727.661	11.6645	-0.0771502	-0.009746	0.196131	0.607574	0.947831	0.364843
715.662	11.6668	-0.17748	0.115023	0.163779	0.454519	0.624226	0.621896
962.399	11.6669	0.0385436	0.379349	-0.236423	0.779739	0.0215819	0.245035
670.602	11.6669	-0.574949	-0.197732	0.129756	0.0479999	0.445689	0.719433
670.978	11.6671	-0.419662	-0.0255299	0.212856	0.221696	0.937726	0.647288
721.002	11.6691	-0.00774668	0.22877	-0.11145	0.96108	0.175372	0.62236
731.655	11.67	-0.2215	0.176213	0.185329	0.435711	0.53224	0.640392
716.001	11.6721	0.180425	0.111752	-0.130117	0.283069	0.496257	0.57351
900.886	11.6729	-1.00737	0.301135	1.29544	0.196962	0.68504	0.236498
726.661	11.6736	0.2061	0.20996	-0.115469	0.0296136	0.0274266	0.325821
720.661	11.6744	0.0688732	0.100482	-0.0549133	0.674052	0.542074	0.811831
703.647	11.6772	-0.129206	0.0121666	0.321099	0.571263	0.957033	0.329897
684.642	11.6782	-0.131648	0.265071	0.00614383	0.50129	0.193974	0.982029
713.651	11.6782	-0.353963	-0.178384	0.373174	0.103278	0.381263	0.207721
623.952	11.68	-0.467512	0.158417	0.678554	0.129439	0.582544	0.121004
608.574	11.6818	-0.225953	0.25835	0.336632	0.310855	0.251183	0.28739
708.987	11.6848	-0.559704	0.0344483	0.532352	0.218237	0.936476	0.39507
719.664	11.6848	0.164518	0.241442	-0.167335	0.29019	0.135058	0.438893
638.28	11.6854	-0.14278	0.0294089	0.0319659	0.39204	0.856808	0.889653
709.312	11.6887	0.160786	0.0971076	-0.133632	0.0195627	0.116794	0.125504
708.653	11.6917	-0.15256	-0.00933869	0.317275	0.475532	0.964574	0.302979
703.992	11.6943	0.0872382	0.0307862	0.0247904	0.560229	0.835553	0.905822
524.764	11.697	0.250195	0.122212	0.270726	0.347485	0.638973	0.467005
749.735	11.6982	-0.196772	0.0579688	0.566709	0.377117	0.789937	0.0933551
713.99	11.7021	0.102828	-0.096228	-0.0928406	0.252335	0.281614	0.453621
911.843	11.705	-0.412436	0.164231	0.650223	0.210326	0.602373	0.167427
449.237	11.7105	0.19685	0.278939	-0.146921	0.393242	0.236879	0.646662
895.642	11.7116	-0.109476	-0.00336873	0.679712	0.504946	0.98339	0.015477
458.76	11.7128	-0.278673	0.189103	0.462252	0.225138	0.398456	0.161715
901.366	11.7133	-0.394981	0.254292	0.724286	0.28193	0.478871	0.173043
458.258	11.7135	0.0787498	0.150188	0.073344	0.265796	0.0519337	0.453465
894.121	11.7176	-0.423649	0.330361	0.802415	0.33603	0.447848	0.207676
895.372	11.7197	-0.108958	0.0687863	0.484649	0.630495	0.760314	0.154408
895.127	11.7216	-0.237727	0.279531	0.571941	0.495531	0.425537	0.259131
894.874	11.7318	-0.396418	0.323038	0.757029	0.315101	0.40792	0.18586
894.375	11.733	-0.25509	0.364446	0.66016	0.479851	0.320642	0.212108
902.3	11.7366	0.1567	0.323381	0.125103	0.448128	0.13838	0.664469
350.536	11.7378	0.28443	-0.00303222	0.442252	0.348056	0.991782	0.305
296.141	11.7393	0.00417828	0.0370262	-0.145585	0.965153	0.70003	0.299032
461.715	11.7456	-0.00989753	0.139334	0.0996211	0.928039	0.225917	0.525786
605.884	11.7521	-0.484862	0.1351	0.823356	0.27322	0.75147	0.195454
295.129	11.7524	-0.267627	0.00237978	0.143011	0.00595669	0.974491	0.198553
849.843	11.7524	-0.503083	0.0969108	0.914039	0.261703	0.821899	0.159409
610.857	11.7585	-0.466449	0.127593	0.84608	0.209287	0.718488	0.118009
850.343	11.7601	0.0394066	-0.16437	0.518804	0.898437	0.59764	0.254888
593.561	11.7626	-0.804872	0.119109	1.22501	0.193638	0.838914	0.165219
593.902	11.7626	-0.441995	0.177907	0.835772	0.237249	0.621008	0.125995
917.286	11.763	-0.0571371	0.0717649	0.415968	0.793806	0.743015	0.201623
611.86	11.7647	-0.538831	0.189503	0.904355	0.253063	0.676345	0.18197
909.31	11.7651	-0.015013	0.179497	0.309219	0.945087	0.420186	0.330913
886.556	11.7653	-0.264637	-0.0228436	0.75784	0.246323	0.916674	0.0350944
594.215	11.7657	0.260741	0.239065	0.0431263	0.219492	0.256686	0.880045
611.519	11.7675	-0.645609	0.0658103	1.041	0.219471	0.89533	0.167245
908.798	11.7675	-0.398411	0.0103213	0.800061	0.226837	0.973776	0.100096
891.329	11.77	-0.214008	0.132768	0.644247	0.488679	0.664485	0.160958
908.302	11.77	-0.207637	0.00341167	0.626617	0.339873	0.987104	0.0622355
890.826	11.7726	-0.966432	0.0885759	1.38755	0.198578	0.900946	0.192516
889.324	11.776	-0.917636	0.0937222	1.2868	0.18841	0.886878	0.191767
889.826	11.776	-0.997371	0.102608	1.36443	0.189697	0.886428	0.203036
890.326	11.776	-0.678391	0.117241	1.0639	0.224235	0.82563	0.18222
593.219	11.776	-0.156876	0.0519034	0.550607	0.541931	0.838352	0.152564
891.835	11.776	-0.388168	0.112042	0.845634	0.260255	0.735588	0.098964
279.688	11.7787	-0.0321297	0.11242	0.171391	0.864964	0.555986	0.52634
916.784	11.779	-0.383652	0.188847	0.749447	0.418059	0.685357	0.272151
916.285	11.7794	-0.235486	0.102315	0.636095	0.413535	0.7176	0.138101
915.781	11.7824	-0.579298	0.188788	0.902326	0.282533	0.717072	0.24013
566.925	11.8001	-0.749223	0.171266	0.896897	0.0572236	0.625586	0.0970859
573.598	11.8168	-0.313944	0.338507	0.150201	0.0727963	0.0566025	0.504609
391.807	11.8199	0.110173	0.352224	0.815672	0.72794	0.282611	0.0959742
489.255	11.8201	0.282754	0.195964	0.445424	0.309025	0.473134	0.260835
391.61	11.8201	0.105508	0.272666	0.741592	0.718962	0.363512	0.101013
566.599	11.8204	-0.871058	0.224909	0.879304	0.091433	0.633795	0.208234
489.508	11.8206	-0.338854	0.370806	1.11458	0.469499	0.430177	0.115416
578.923	11.8212	-0.281012	0.225565	0.159455	0.0960416	0.168555	0.470951
848.9	11.8212	-1.05802	0.277155	0.932926	0.112213	0.652677	0.29823
565.933	11.8212	-1.07101	0.236715	0.832532	0.0944991	0.686149	0.327728
566.268	11.8212	-0.67886	0.225999	0.46428	0.0517905	0.468952	0.301575
848.398	11.8212	-0.744594	0.284086	0.602274	0.0869884	0.478159	0.297092
583.9	11.8245	-0.527273	0.127668	0.404605	0.0745133	0.632994	0.29831
434.443	11.8274	-0.0911191	0.240894	0.101892	0.623727	0.214376	0.69724
584.227	11.8277	0.0866487	0.0842153	-0.227149	0.598557	0.608688	0.33934
854.312	11.8324	-0.311105	-0.113931	0.505525	0.18916	0.613434	0.137758
206.154	11.8393	0.523667	0.33283	-1.0602	0.198956	0.399398	0.0799157
648.936	11.8402	-0.116293	0.306809	0.465663	0.58737	0.174199	0.148136
390.675	11.8544	-0.0136168	0.0448662	0.136018	0.940477	0.805999	0.601127
853.8	11.8608	-0.519224	-0.103564	0.677004	0.147139	0.757054	0.177174
552.951	11.8679	-0.354816	-0.133593	0.115812	0.0243674	0.327774	0.540757
397.555	11.8725	0.265784	0.0625065	0.441825	0.327227	0.812321	0.254857
122.096	11.9002	0.0432273	0.0352224	-0.332343	0.893477	0.913099	0.473898
706.335	11.9055	0.119354	0.506507	-0.299242	0.616435	0.0579677	0.382627
267.042	11.9439	0.26963	0.241007	-0.462277	0.321714	0.372752	0.236248
444.268	11.9716	-0.0438104	-0.0609371	-0.0812363	0.378433	0.230839	0.256321
442.265	11.9901	-0.732871	-0.104438	0.608655	0.0988017	0.796882	0.304708
443.266	11.9901	-0.334866	-0.0710608	0.226723	0.0590904	0.653207	0.323211
420.735	12.0153	-0.406456	0.0586954	0.126089	0.15574	0.826648	0.739902
246.17	12.0165	-0.718134	-0.460411	0.311539	0.0901531	0.25174	0.570784
190.048	12.0202	-0.0280573	0.18507	-0.14283	0.943088	0.640075	0.797593
247.173	12.0208	-0.443944	-0.409963	0.186993	0.214323	0.248156	0.698396
420.233	12.0398	-0.0675053	0.0526469	-0.228043	0.345428	0.456793	0.043526
365.154	12.0422	0.72391	-0.306887	0.196372	0.050873	0.359106	0.671445
350.189	12.0427	0.650396	-0.335165	0.38199	0.0461724	0.25914	0.356317
328.205	12.0437	0.985174	-0.367522	0.260666	0.0410694	0.390763	0.661188
349.184	12.055	0.483855	-0.367788	0.607642	0.153456	0.264953	0.198978
327.201	12.0558	0.784151	-0.406265	0.477661	0.0889891	0.345379	0.428695
344.228	12.0581	0.717693	-0.317636	0.236718	0.0478841	0.331885	0.601085
351.189	12.0581	0.706814	-0.292173	0.213712	0.0550035	0.380571	0.644104
209.078	12.0604	0.10833	-0.021808	-0.357191	0.585722	0.911807	0.222105
637.972	12.0695	-0.0992795	0.198007	0.238752	0.846512	0.700489	0.742609
181.578	12.0702	0.226812	0.459045	-0.12598	0.511749	0.202103	0.794247
147.542	12.0732	0.251099	0.256161	-0.0454994	0.175133	0.167555	0.853569
128.07	12.0804	0.618104	0.3352	-0.523806	0.0239785	0.170283	0.134481
196.06	12.0828	0.30304	0.34089	-0.361792	0.138443	0.101282	0.202188
523.629	12.1006	-0.194325	-0.265298	-0.14858	0.203314	0.0952111	0.475275
363.165	12.1063	-0.355038	-0.374341	0.46718	0.201168	0.180152	0.231135
495.137	12.1117	0.0685619	-0.0886793	-0.422779	0.829134	0.78036	0.359384
411.761	12.1579	-0.279959	0.16502	0.114727	0.201282	0.435566	0.697165
353.674	12.1638	0.4892	0.698615	-0.724363	0.20192	0.082366	0.183599
408.223	12.1874	0.134784	0.343185	-0.161584	0.176236	0.00540947	0.244017
408.725	12.188	-0.109435	0.404811	0.12079	0.663437	0.133245	0.733506
369.553	12.1926	0.392734	0.508043	-0.239122	0.0236793	0.00693308	0.264556
256.028	12.2096	0.0453187	-0.161761	-0.0350926	0.700766	0.192819	0.832785
312.501	12.2165	0.310116	0.322516	-0.0944833	0.0142231	0.0117885	0.520386
338.09	12.2307	0.625234	-0.274564	-0.846862	0.360739	0.681548	0.380337
477.751	12.2307	0.0426966	0.308291	0.0958021	0.764622	0.0556875	0.636245
318.503	12.246	-0.495827	0.3077	0.628738	0.312937	0.522761	0.362532
318.837	12.246	-0.410465	0.322831	0.574723	0.378529	0.484398	0.383048
433.582	12.247	0.379742	0.450541	0.411737	0.410891	0.333436	0.524657
143.07	12.2472	0.176329	-0.286677	-0.166863	0.429979	0.213556	0.593297
477.248	12.2472	0.0629567	0.326481	0.0397132	0.670074	0.0510236	0.848568
317.516	12.248	0.0603115	0.292339	0.199548	0.771991	0.18428	0.50298
318.17	12.248	-0.0678036	0.250675	0.153681	0.650226	0.119812	0.471973
476.748	12.2485	-0.793437	0.341565	0.906331	0.305066	0.649726	0.401934
251.048	12.2852	-0.918323	-0.41937	-0.689647	0.137181	0.472274	0.405977
671.353	12.2881	-0.0578976	0.288315	-0.349201	0.71806	0.099493	0.149287
649.844	12.3612	-0.112836	0.0775619	0.393309	0.654131	0.757291	0.284603
648.82	12.4036	-0.45101	-0.0863991	0.245344	0.175343	0.782994	0.583057
202.048	12.4333	-0.119284	-0.367119	-0.0749416	0.660183	0.197668	0.844361
179.52	12.4482	0.0875533	-0.291162	-0.172085	0.840774	0.509604	0.780341
105.034	12.4595	-0.10354	-0.33729	-0.0816914	0.730591	0.278819	0.847254
180.066	12.4622	-0.357591	-0.431104	0.110357	0.218174	0.145812	0.777984
347.127	12.4804	0.309967	-0.0364188	-0.268612	0.263091	0.891025	0.481817
782.789	12.5496	0.393163	0.0727696	-0.312916	0.122025	0.757123	0.358967
783.29	12.5497	0.484933	0.0827124	-0.418929	0.0827888	0.744016	0.260546
771.801	12.5498	0.044004	0.109382	-0.0773256	0.651547	0.277218	0.576065
811.776	12.5498	-0.111254	-0.0459252	0.11264	0.12941	0.505069	0.260736
830.248	12.5498	-0.0320326	-0.0566847	0.0202944	0.728622	0.542581	0.876091
837.731	12.5498	0.160779	-0.013614	-0.223298	0.229711	0.91504	0.237428
839.235	12.5498	0.0700049	-0.0267134	-0.0750887	0.457104	0.773184	0.569811
617.959	12.55	0.159693	0.0101862	0.683172	0.828356	0.988949	0.517098
919.321	12.55	0.209795	0.231974	-0.600421	0.5587	0.518922	0.251963
838.232	12.5527	0.0445082	-0.0118695	-0.089415	0.695291	0.916418	0.579853
811.274	12.5556	-0.112646	-0.0238077	0.114847	0.194269	0.772228	0.336936
772.799	12.5556	0.287159	0.0855283	-0.239167	0.136119	0.634914	0.357731
782.288	12.5612	0.29914	0.110396	-0.301284	0.209632	0.628205	0.359717
772.298	12.5641	0.186142	0.0804091	-0.163481	0.184045	0.547469	0.392942
838.733	12.5641	0.0519632	-0.0335535	-0.0780466	0.666131	0.779786	0.647039
849.713	12.5705	0.244892	-0.131144	-0.298153	0.351856	0.610923	0.419511
563.235	12.5713	0.0140734	-0.194813	-0.163137	0.969037	0.594487	0.751147
831.252	12.5726	0.0909305	-0.0606608	-0.0590534	0.173724	0.348345	0.512263
812.277	12.5726	0.0329986	-0.00128743	-0.0177405	0.515639	0.979482	0.802519
812.778	12.5726	0.0906947	0.0021892	-0.0388899	0.345054	0.98127	0.768713
813.284	12.5726	0.191888	0.0192935	-0.137328	0.238746	0.901308	0.537454
830.752	12.5727	-0.00795833	-0.019891	-0.0301342	0.908972	0.775547	0.760122
808.753	12.5759	0.312401	0.0308453	-0.265121	0.250134	0.905581	0.478114
809.253	12.5766	0.334928	0.102555	-0.357064	0.210485	0.687738	0.334783
833.782	12.5767	0.267011	-0.309288	0.107854	0.38952	0.32274	0.801537
773.299	12.5801	0.410045	0.116716	-0.429274	0.142796	0.655995	0.263366
841.751	12.5887	0.359807	0.0664457	-0.370195	0.150074	0.77626	0.280212
558.823	12.5889	0.315767	0.013307	-0.311356	0.264812	0.960938	0.427405
473.79	12.5981	0.427082	0.316925	-0.878729	0.00883213	0.034055	0.00104774
813.793	12.6007	0.323298	-0.00923333	-0.167035	0.13066	0.962818	0.555482
472.78	12.6007	-0.141037	0.331235	-0.373799	0.743492	0.44919	0.54321
841.25	12.6022	0.383465	-0.0204329	-0.236151	0.0839356	0.918854	0.41522
833.292	12.6037	0.162819	-0.176775	0.0973283	0.409573	0.372456	0.722566
775.755	12.6038	0.0824869	-0.244781	-0.176786	0.797499	0.453835	0.698191
540.272	12.604	0.154313	0.115439	-0.00417002	0.142856	0.258825	0.975992
786.743	12.6042	0.324977	-0.0956258	-0.234809	0.46133	0.825607	0.702939
776.259	12.6074	0.178894	-0.169247	-0.295843	0.584752	0.604795	0.524287
372.226	12.6254	0.579945	-0.40253	0.0315711	0.188748	0.347891	0.957254
540.776	12.6285	-0.123353	0.212492	0.308101	0.621577	0.402319	0.391079
771.32	12.6285	-0.0457507	0.0828036	0.10178	0.66154	0.43456	0.494953
339.868	12.629	-0.365206	0.257747	-0.43938	0.483723	0.618312	0.549569
388.252	12.6296	0.437307	-0.465687	-0.0548787	0.338597	0.310045	0.930262
394.211	12.6296	0.522037	-0.349863	-0.0682073	0.190289	0.365599	0.89808
371.228	12.6298	0.341586	-0.497165	0.305342	0.422385	0.253416	0.607568
823.809	12.6311	0.235407	0.0891397	-0.10704	0.0736832	0.458416	0.526924
902.901	12.6311	0.150155	0.239758	-0.0824152	0.511477	0.304548	0.796485
823.322	12.6312	0.13015	0.10624	0.0211221	0.165871	0.248538	0.865461
984.375	12.6312	0.51798	0.0340723	-0.5023	0.0133269	0.840363	0.0619018
509.792	12.6312	0.123628	0.387639	-1.20337	0.818359	0.478053	0.140994
824.294	12.6312	0.333583	0.0866355	-0.210576	0.0472162	0.559777	0.326263
901.897	12.6312	-0.0618698	0.252041	0.137688	0.868941	0.507281	0.795394
902.399	12.6312	0.0557393	0.230649	0.0331599	0.860537	0.474284	0.941035
475.897	12.6415	-0.0522873	0.205299	-0.0881518	0.773055	0.275166	0.731305
393.21	12.6471	0.29302	-0.457784	0.232406	0.495305	0.296789	0.699164
834.302	12.6557	0.189952	-0.0061157	-0.124723	0.208262	0.965929	0.542841
839.788	12.657	0.00885099	-0.00530109	-0.0222055	0.915581	0.949367	0.850957
713.835	12.6576	-0.706483	0.121312	0.502646	0.155081	0.794314	0.452419
712.833	12.6585	-1.12876	0.120061	0.909564	0.158433	0.872692	0.401302
713.334	12.6585	-0.489981	0.0876111	0.27468	0.154021	0.785451	0.549922
440.725	12.6586	0.135385	0.287772	-0.0855539	0.485691	0.158888	0.752353
714.333	12.6812	0.0209142	0.15938	-0.280533	0.880315	0.270152	0.178594
840.294	12.6845	0.0650084	-0.0535	-0.2097	0.605353	0.669786	0.25482
292.186	12.6845	0.144593	0.11584	-0.430767	0.65667	0.721131	0.359344
819.814	12.6847	0.292173	0.133488	-0.0620317	0.0290584	0.259827	0.700692
609.345	12.6849	-0.25572	0.187467	-0.0549609	0.296537	0.436694	0.869451
822.845	12.6851	-0.0225606	0.113011	0.166496	0.885499	0.477769	0.460196
662.811	12.6854	-0.599186	-0.0216797	0.799089	0.258381	0.965965	0.284371
610.347	12.6854	-0.0772283	0.166023	-0.313163	0.643849	0.331992	0.205728
662.308	12.6854	-0.201315	-0.0150613	0.372813	0.395632	0.94811	0.273655
955.371	12.6881	0.394952	-0.0118011	-0.545296	0.0203938	0.933452	0.0226559
406.573	12.7106	-0.345406	0.0155697	0.129794	0.0511373	0.92027	0.55948
400.747	12.7112	-0.0848907	0.375553	0.0451769	0.644565	0.0667913	0.861357
663.311	12.712	0.0787006	-0.0131892	0.0779516	0.394294	0.883817	0.545957
985.394	12.712	0.489844	0.0947048	-0.380768	0.0302892	0.625149	0.186657
663.823	12.7121	-0.172336	0.0120176	0.380675	0.447518	0.956949	0.247482
822.365	12.7122	-0.208685	0.119911	0.384423	0.492602	0.690355	0.376394
549.251	12.7251	0.493879	0.157943	-0.205971	0.0557787	0.494911	0.528179
830.041	12.7256	0.317594	0.125037	-0.124862	0.217227	0.612263	0.719291
952.901	12.7256	0.236173	0.0488115	-0.364033	0.0103125	0.510189	0.00664132
961.377	12.7389	0.263728	-0.0411724	-0.490344	0.135862	0.802268	0.0608566
987.742	12.7389	-0.0235278	-0.215386	0.372333	0.916107	0.348774	0.258458
548.92	12.7389	-0.109853	0.205239	0.445378	0.711829	0.494817	0.30437
546.552	12.739	-0.195623	0.179035	0.486083	0.591342	0.622639	0.354633
942.929	12.739	0.261759	0.130047	-0.155167	0.219005	0.52619	0.591421
819.318	12.739	0.00647562	0.182789	0.255564	0.978399	0.453132	0.458101
545.885	12.739	-0.238048	0.211571	0.540382	0.518733	0.565187	0.310195
547.583	12.739	-1.16971	0.177646	1.43018	0.260877	0.858789	0.326141
547.917	12.739	-1.51832	0.18563	1.77474	0.24601	0.882155	0.331104
548.251	12.739	-0.485928	0.192545	0.746549	0.376511	0.720265	0.338845
548.586	12.739	-0.762015	0.224258	1.05135	0.316771	0.76137	0.327991
943.919	12.739	0.202068	0.0975643	-0.267566	0.201314	0.520371	0.228627
820.872	12.739	-1.19849	0.150017	1.38949	0.253458	0.881405	0.34262
821.374	12.739	-1.20439	0.153708	1.38666	0.250592	0.878312	0.34279
821.874	12.739	-1.13861	0.179535	1.31319	0.261481	0.853661	0.353338
818.317	12.739	-0.169388	0.201996	0.45017	0.650455	0.589995	0.402248
818.818	12.739	-0.187881	0.254887	0.444342	0.639616	0.527736	0.439365
541.571	12.739	0.329411	0.277533	-0.0790644	0.0466037	0.0829461	0.700319
927.376	12.739	-0.427605	-0.0584589	-0.28332	0.0398965	0.746216	0.284076
942.411	12.739	0.337548	0.0362504	-0.318373	0.0945612	0.843743	0.241658
939.366	12.739	-0.0991214	-0.0369969	-0.312445	0.450574	0.774739	0.115065
831.856	12.739	-0.209219	0.113513	0.386871	0.498968	0.710838	0.381575
927.882	12.739	-0.430336	0.0529737	0.282556	0.0625744	0.796844	0.344834
928.394	12.739	-0.28865	0.0756781	0.32883	0.0866104	0.622485	0.154343
820.691	12.739	0.131963	0.131913	0.124051	0.382991	0.383165	0.556557
992.396	12.739	0.333785	-0.0349862	-0.319162	0.0474517	0.81246	0.15235
546.22	12.739	0.242803	0.201771	0.0241304	0.0795952	0.133835	0.891302
834.598	12.739	-0.0843839	0.145751	0.180147	0.78759	0.643211	0.685102
961.887	12.739	0.289795	0.0417998	-0.317999	0.0542921	0.753513	0.11853
957.43	12.739	0.267668	0.125559	-0.352932	0.288896	0.60864	0.320516
949.414	12.739	0.190741	0.0431703	-0.327748	0.301091	0.808738	0.216076
938.369	12.739	-0.363452	-0.0575192	-0.326412	0.0221283	0.666056	0.109958
420.421	12.739	-0.0243105	0.0989233	0.222603	0.917606	0.675452	0.50896
848.813	12.739	0.16537	0.119583	-0.172301	0.191613	0.332522	0.324042
554.91	12.739	-0.865011	0.151041	1.0669	0.258456	0.837093	0.319678
555.245	12.739	-0.0623474	0.115406	0.216612	0.722053	0.514423	0.391748
555.577	12.739	-0.746188	0.125287	0.939719	0.280621	0.850802	0.332976
555.91	12.739	-0.435617	0.064266	0.645364	0.311009	0.877192	0.290059
832.362	12.739	-0.175105	0.146936	0.367402	0.557243	0.621195	0.390085
762.827	12.739	0.342344	0.157299	-0.0495764	0.115826	0.441209	0.861186
938.872	12.739	-0.340561	-0.00588299	-0.32267	0.0476202	0.968784	0.156014
424.419	12.739	-0.743235	0.0731889	0.921972	0.261839	0.908305	0.320572
762.321	12.739	0.354005	0.0537829	-0.116469	0.0359672	0.712105	0.57429
988.448	12.7391	0.225805	0.241155	-0.235177	0.19491	0.169298	0.327972
951.924	12.7391	0.1453	0.0847363	-0.302101	0.354133	0.581999	0.186181
830.869	12.7391	-0.00449506	0.0287322	0.25769	0.986255	0.912352	0.491761
425.421	12.7391	-0.267215	0.299055	0.334391	0.523255	0.47644	0.571076
832.862	12.7391	-0.141313	0.184297	0.296759	0.615314	0.51464	0.459935
987.947	12.7519	-0.0368515	0.1282	-0.0385804	0.86474	0.557563	0.899608
956.93	12.7522	0.245917	0.127504	-0.233879	0.392362	0.651754	0.560055
989.442	12.7522	0.317929	0.203692	-0.227705	0.00130025	0.0147504	0.0400963
976.905	12.7522	0.209854	-0.167889	-0.231515	0.165801	0.257229	0.268332
923.385	12.7522	0.434623	0.130442	-0.562007	0.0113589	0.355155	0.0173395
981.948	12.7523	0.285311	-0.0618288	0.0699291	0.0661713	0.657219	0.722052
620.75	12.7524	0.262945	-0.299828	0.0916621	0.541014	0.487359	0.878846
989.885	12.7527	0.277843	0.111607	-0.427297	0.0412361	0.357697	0.0296229
424.921	12.7647	-0.104985	0.162391	0.245839	0.654181	0.49226	0.463261
424.67	12.765	-0.463209	0.0473243	0.640508	0.290615	0.910817	0.300732
959.414	12.7653	0.256997	0.221564	-0.534535	0.157054	0.215161	0.0507557
980.948	12.7653	0.281155	0.0622223	-0.0455119	0.228752	0.780359	0.88511
949.926	12.7656	0.274322	0.0625287	-0.207789	0.171541	0.740927	0.444417
992.948	12.7656	0.230995	0.081404	-0.149511	0.345684	0.733129	0.658731
993.95	12.7657	0.18594	0.105486	-0.172882	0.51677	0.710444	0.667496
965.946	12.7658	0.166331	0.220217	-0.234512	0.569012	0.454376	0.570164
994.452	12.7658	0.349391	0.203051	-0.263238	0.145213	0.375729	0.414919
986.963	12.7658	-0.0150162	0.227253	0.177987	0.971154	0.587819	0.762514
556.233	12.7658	0.270468	0.0773987	-0.419715	0.0342312	0.48655	0.0233077
565.221	12.7658	-0.184555	-0.01767	0.258141	0.414594	0.936368	0.419509
561.563	12.7659	0.147005	-0.122101	0.0738451	0.376655	0.459265	0.748075
941.904	12.7659	0.231198	-0.0258652	-0.094336	0.219772	0.885287	0.710903
944.904	12.766	0.17784	0.00776326	-0.218759	0.0835518	0.933378	0.123968
971.437	12.766	0.250369	0.122566	-0.156866	0.189752	0.502872	0.54324
991.398	12.766	0.381223	-0.0448825	-0.461984	0.0093133	0.699133	0.0193977
846.836	12.766	0.0143631	-0.0535004	0.0676856	0.898551	0.637162	0.672613
994.952	12.766	0.252574	0.258649	-0.325665	0.177363	0.168306	0.214402
334.141	12.766	-0.109779	0.0251193	-0.214691	0.474984	0.86808	0.330264
964.94	12.7661	0.0353243	0.147613	-0.0729384	0.925248	0.696367	0.891074
335.142	12.7662	0.0320921	-0.000383137	-0.263484	0.861741	0.998339	0.326946
998.938	12.7662	0.275437	0.0227026	-0.23502	0.127893	0.892139	0.335519
887.866	12.7662	-0.0160752	-0.0115114	-0.308108	0.92245	0.944416	0.210448
565.555	12.7662	-1.17314	-0.022381	1.23747	0.20423	0.979607	0.332674
979.947	12.7663	0.171202	0.14715	-0.242393	0.576796	0.630559	0.576369
566.224	12.7663	-0.119779	-0.00747156	0.17526	0.505561	0.966388	0.491369
957.939	12.7664	0.144801	0.137178	-0.261343	0.652378	0.669353	0.566973
958.432	12.7664	0.19864	0.15324	-0.314949	0.32774	0.444584	0.276218
618.939	12.7664	-0.604866	0.188408	0.733989	0.171469	0.652346	0.233454
972.945	12.7664	0.0475968	0.0774469	0.00689832	0.876687	0.80092	0.987302
979.445	12.7664	0.154333	0.0335844	-0.0715079	0.527505	0.889271	0.834099
974.443	12.7664	0.196576	0.11063	-0.244454	0.236169	0.491568	0.292734
978.944	12.7664	0.250881	0.207228	-0.282387	0.283902	0.370525	0.387344
952.438	12.7664	-0.0166769	0.00759093	-0.0960008	0.907658	0.957879	0.639112
843.852	12.7664	-0.043074	0.0224255	0.0238845	0.642903	0.808291	0.854891
560.566	12.7664	-0.811495	-0.0672273	0.928156	0.21831	0.914598	0.311418
958.935	12.7668	0.152882	0.0979918	-0.372271	0.460597	0.632703	0.218768
638.624	12.7668	0.175421	0.0254608	-0.0738553	0.575285	0.934528	0.866285
564.557	12.7672	-0.165025	0.107463	0.163699	0.496796	0.655326	0.631005
963.935	12.768	0.268516	0.148375	-0.332332	0.37177	0.615269	0.431659
560.9	12.768	-0.611733	-0.0391712	0.688824	0.232543	0.936115	0.333832
562.236	12.768	-0.0507702	-0.0625066	0.0911348	0.601756	0.522424	0.509979
966.94	12.7707	0.0305007	0.0820283	-0.0870566	0.932362	0.819706	0.864088
973.946	12.7793	0.154614	0.192944	-0.191675	0.590268	0.503849	0.636187
973.447	12.7793	0.21752	0.0554509	-0.167445	0.313585	0.790932	0.574462
848.33	12.7793	-0.116997	-0.0607613	0.197079	0.548071	0.753025	0.476478
928.915	12.7799	-0.0658355	0.0499674	-0.0493699	0.837525	0.876248	0.913327
619.949	12.7802	-0.27627	0.0515482	0.304396	0.542078	0.908357	0.633175
847.829	12.7802	-0.337039	0.0182496	0.313815	0.293965	0.953	0.480776
847.328	12.7802	-0.303679	-0.0426153	0.31477	0.248133	0.865577	0.387936
619.614	12.7802	-0.195395	0.128142	0.215026	0.579251	0.71457	0.664884
842.857	12.7802	-0.0976081	-0.0704393	0.296041	0.606438	0.708909	0.283423
964.442	12.7803	0.197936	0.240341	-0.32698	0.541252	0.460755	0.47739
929.421	12.7808	0.0852629	0.0930557	-0.28013	0.80113	0.783472	0.561964
564.888	12.7918	-0.124613	0.014199	0.279667	0.587261	0.950207	0.395724
560.232	12.7918	-0.282128	-0.0716899	0.315509	0.22468	0.746704	0.328516
999.941	12.7925	0.301394	0.126858	-0.248689	0.0537243	0.369336	0.2238
562.902	12.7925	-0.495655	-0.0695545	0.651875	0.246268	0.865005	0.278182
981.461	12.7932	0.163409	-0.0490418	0.102718	0.256544	0.723355	0.601868
578.271	12.7936	0.119208	0.348771	-0.315858	0.300785	0.0119401	0.0719399
561.23	12.7966	0.157405	-0.028588	-0.0525761	0.0617075	0.703644	0.62195
632.94	12.8024	-0.159133	-0.0951497	0.197954	0.645645	0.78242	0.685408
843.354	12.8024	-0.00974845	-0.0159066	0.0320631	0.916272	0.863879	0.807144
811.872	12.806	0.242997	0.363146	0.237115	0.336809	0.165299	0.500827
637.592	12.8064	-0.253586	-0.131832	0.193815	0.315604	0.593058	0.578802
921.919	12.8197	0.171433	0.172025	-0.403554	0.55686	0.55553	0.337375
647.939	12.82	-0.164687	0.0335425	0.108312	0.38536	0.856305	0.680631
632.601	12.8201	0.209819	-0.173338	-0.204982	0.135346	0.207308	0.284433
922.417	12.8201	0.337713	0.0632663	-0.523545	0.186298	0.793389	0.1517
561.866	12.8209	-0.0714797	0.0324623	0.136261	0.691331	0.856319	0.594055
884.37	12.8209	0.163965	-0.067773	-0.201271	0.119738	0.492079	0.169045
578.78	12.8308	-0.00140781	0.262259	-0.0974805	0.990367	0.0488984	0.558891
921.42	12.834	0.441096	0.165985	-0.398608	0.00685552	0.211086	0.0498096
656.916	12.837	-0.410284	0.0421078	0.209845	0.316963	0.91547	0.709548
913.376	12.861	0.292621	0.0680768	-0.0562836	0.0896692	0.665283	0.799537
651.607	12.8616	-0.0509272	-0.256846	0.19993	0.738269	0.119137	0.364943
914.395	12.8746	0.252032	-0.029797	-0.289593	0.166695	0.861742	0.251523
374.9	12.8865	0.313326	0.0893752	-0.120516	0.0849325	0.590386	0.607477
404.738	12.8998	-0.174668	0.509803	-0.200829	0.679958	0.24693	0.736857
405.735	12.9012	0.457599	0.543914	-0.778703	0.0393085	0.0191672	0.0181379
183.101	12.9023	0.328999	-0.101506	-0.32895	0.216748	0.689935	0.370841
576.176	12.9032	0.189625	0.224158	-0.299104	0.584496	0.519613	0.542875
514.875	12.9034	0.209762	0.323175	-0.0270362	0.190649	0.0587344	0.899539
802.27	12.904	0.388315	0.171822	-0.043525	0.203608	0.557152	0.915327
375.575	12.9092	0.182779	-0.0901485	0.0526932	0.302599	0.601659	0.827922
914.902	12.9143	0.296991	0.0504331	-0.217436	0.0554997	0.713666	0.279806
892.38	12.9264	0.292744	0.182485	-0.39301	0.0296013	0.138134	0.0364589
908.413	12.9284	0.192002	0.134646	-0.29487	0.0614683	0.165935	0.0459247
378.159	12.931	0.490837	0.0948446	-0.716781	0.0717367	0.699032	0.0645713
377.148	12.931	0.380243	0.151417	-0.66349	0.131153	0.521949	0.0716911
797.803	12.9533	0.271429	0.191026	-0.154374	0.237984	0.395638	0.62189
532.536	12.9533	0.0291326	0.0756355	0.22279	0.921548	0.798552	0.597603
907.408	12.9537	0.464154	0.258685	-0.395236	0.00436262	0.059944	0.0455492
280.153	12.955	-0.733596	-0.335638	0.131528	0.0629315	0.352278	0.79128
772.356	12.9556	-0.103283	-0.850173	1.26422	0.874003	0.214656	0.19419
906.916	12.9569	-0.107546	-0.178089	0.377513	0.695306	0.520216	0.342958
770.347	12.9576	-0.718381	0.172992	0.789156	0.256386	0.775993	0.370193
513.9	12.9576	-0.428538	0.188699	0.59083	0.317197	0.651077	0.328742
531.874	12.9576	-0.666543	0.0812826	0.836501	0.229802	0.877967	0.281949
770.849	12.958	-0.876705	0.17278	0.952052	0.241936	0.809606	0.360303
526.549	12.958	-0.0392986	0.10942	0.169765	0.869246	0.648658	0.61766
531.538	12.958	-0.230408	0.188044	0.328808	0.480703	0.562841	0.476851
781.842	12.9606	0.00610303	0.233519	0.234089	0.978316	0.31459	0.468751
781.337	12.9606	0.184793	0.179997	0.00329157	0.25002	0.261518	0.987919
514.574	12.9606	-0.125385	0.244207	0.286994	0.635768	0.36577	0.44862
526.883	12.9606	-0.20303	0.0571819	0.359429	0.432098	0.821629	0.330716
796.798	12.9701	-0.0666397	0.0921365	0.214741	0.758107	0.671128	0.488406
789.313	12.9701	0.466462	0.0859438	-0.231474	0.0328604	0.647845	0.392597
316.025	12.971	0.333195	-0.238221	-0.512496	0.218154	0.36729	0.184138
797.31	12.9796	0.150728	0.181916	-0.0975287	0.399413	0.314057	0.694519
514.236	12.9796	0.189358	0.145775	-0.0581348	0.0782807	0.15887	0.672887
766.376	12.9839	0.2583	0.308986	-0.147363	0.106117	0.0610391	0.483587
383.692	12.986	0.0320358	0.223501	0.242605	0.868996	0.26884	0.388436
240.09	13.012	0.326432	-0.0423634	-0.417503	0.144353	0.838946	0.181571
856.891	13.0135	0.263508	0.213845	0.117677	0.318168	0.412802	0.745404
419.727	13.021	0.0377398	0.532546	0.488219	0.892908	0.0855234	0.23936
878.396	13.0332	0.322691	0.0598118	-0.139138	0.366165	0.863491	0.777677
517.912	13.0338	0.496797	1.85664	-0.528743	0.209972	0.000936482	0.334979
518.581	13.0338	0.673891	1.70191	-0.726535	0.0797249	0.00096848	0.164655
878.903	13.0398	0.0509178	0.10241	0.115315	0.904892	0.810351	0.848368
856.391	13.0412	0.433652	0.259229	-0.0263121	0.159272	0.380684	0.948546
518.241	13.0454	0.49918	0.923216	-0.603814	0.112273	0.0108696	0.16556
476.761	13.0655	-0.531331	-0.170722	0.382108	0.162981	0.634802	0.457115
598.306	13.0697	0.188393	0.0445285	-0.403062	0.308074	0.803458	0.13823
267.121	13.0741	0.203462	-0.0551805	-0.298166	0.19123	0.708705	0.177292
281.135	13.0741	0.0693371	-0.0104103	-0.228724	0.627639	0.941504	0.27328
282.135	13.0928	0.329833	0.0612134	-0.440185	0.0691503	0.707163	0.0830662
484.779	13.1288	0.455372	0.399385	0.139899	0.272681	0.331778	0.804495
452.208	13.1435	0.45017	0.153139	-0.542446	0.251305	0.68507	0.322825
111.111	13.1441	0.254478	-0.105103	-0.241484	0.141258	0.519205	0.305267
435.89	13.1448	0.448497	-0.367749	0.0142229	0.392518	0.479844	0.984327
327.842	13.145	-0.00803023	-0.0583388	0.0648465	0.958696	0.707999	0.768066
433.282	13.1454	0.372646	-0.239423	-0.09432	0.328773	0.52284	0.856981
432.279	13.1459	0.112214	-0.427465	0.303511	0.738472	0.224323	0.527065
491.262	13.1459	-0.474078	-0.154393	0.48491	0.158192	0.625887	0.292892
438.239	13.1459	0.151046	-0.336336	0.228327	0.653494	0.32957	0.631661
491.764	13.1459	-0.653492	-0.154903	0.704347	0.168284	0.728836	0.281618
415.254	13.1496	0.0209557	-0.420496	0.402327	0.951727	0.245463	0.421101
437.237	13.154	-0.0700918	-0.414605	0.495775	0.825842	0.215536	0.288377
112.115	13.1548	0.538124	0.039597	-0.587072	0.128783	0.903895	0.22768
659.33	13.1549	-0.0528311	-0.27292	-0.0884058	0.763826	0.146929	0.722515
460.777	13.1756	0.240531	0.311212	-0.459075	0.263533	0.158338	0.14326
466.773	13.1997	-0.141561	0.112454	-0.0894102	0.620517	0.693226	0.82388
877.904	13.2041	-0.078781	0.250336	0.41289	0.917556	0.743004	0.70253
184.543	13.2044	0.366919	-0.207817	-0.488628	0.125816	0.361404	0.146207
451.214	13.211	-0.246201	-0.386467	0.396739	0.414483	0.213669	0.355478
416.253	13.211	-0.064562	-0.423137	0.309465	0.674043	0.0211338	0.177318
579.889	13.2132	-0.465914	-0.279239	0.240298	0.0263827	0.142128	0.350814
417.258	13.2176	0.102838	-0.405607	0.205126	0.636395	0.0886416	0.50794
309.132	13.2272	0.284693	0.00379081	-0.432511	0.266698	0.987705	0.235546
539.244	13.2282	0.3438	0.00615011	-0.61362	0.250081	0.982845	0.156201
580.705	13.2372	-0.0874287	-0.278012	-0.0736371	0.318343	0.00958881	0.54394
724.872	13.239	-0.679608	-0.314046	0.323496	0.0522143	0.323202	0.465211
567.245	13.2394	0.469118	0.0950421	-0.802068	0.252224	0.808884	0.174079
525.232	13.2394	0.410967	-0.0127131	-0.726908	0.242874	0.969842	0.153443
581.259	13.2405	0.532652	0.0915904	-0.789539	0.18643	0.810015	0.16832
274.136	13.241	0.46238	0.0551162	-0.739635	0.192404	0.869473	0.146039
176.559	13.241	0.163859	-0.110328	0.0190714	0.471298	0.624455	0.951913
290.163	13.2417	0.280679	-0.000767777	-0.434838	0.320718	0.997761	0.279643
568.243	13.2417	0.62405	0.139601	-0.950861	0.131388	0.716756	0.107809
580.098	13.2417	-0.301238	-0.349409	-0.00142174	0.0151283	0.00727294	0.992052
273.134	13.2421	0.132809	-0.282424	-0.168575	0.676452	0.384085	0.707687
725.134	13.2425	-0.156051	-0.323366	-0.0902759	0.297874	0.0499118	0.660896
724.621	13.2425	-0.447753	-0.276999	0.109054	0.0275445	0.134792	0.65564
330.039	13.2538	0.364924	-0.0722455	-0.495595	0.102257	0.724383	0.114377
169.09	13.2548	0.199224	-0.182097	-0.320895	0.279932	0.320423	0.223387
553.228	13.2616	0.441878	-0.0540902	-0.715628	0.234022	0.878705	0.178699
537.231	13.2789	0.4148	-0.00586575	-0.710191	0.236492	0.986004	0.15989
306.131	13.3016	-0.13443	0.072971	0.030431	0.494963	0.708069	0.911707
194.081	13.3481	-0.499633	0.180462	0.0247228	0.132543	0.562037	0.954714
520.123	13.3593	-0.110774	-0.0769874	0.414879	0.80557	0.864031	0.519399
516.612	13.3655	-0.261767	-0.051076	0.645291	0.554482	0.907167	0.313629
76.039	13.3659	-0.181472	0.180784	-0.148557	0.671531	0.67269	0.805351
422.103	13.3673	0.108304	-0.0692353	0.0877054	0.78704	0.862692	0.876863
500.164	13.3786	0.232118	-0.0721806	-0.104908	0.433679	0.804176	0.798887
404.022	13.3786	0.0682009	-0.104688	0.258832	0.85241	0.775538	0.620037
276.531	13.3786	-0.00815802	-0.0949122	0.460675	0.987425	0.854665	0.534353
543.743	13.3787	0.203375	-0.00754803	-0.0320185	0.154682	0.954917	0.865459
745.35	13.3821	0.0190586	-0.0688564	-0.0293174	0.864303	0.541548	0.852555
744.858	13.3821	-0.361893	-0.0684371	0.360795	0.139407	0.76423	0.280686
745.116	13.3821	-0.166844	-0.0794253	0.127227	0.24381	0.56578	0.516651
497.143	13.3844	-0.417257	-0.180722	0.664516	0.184819	0.547209	0.140885
519.12	13.3844	-0.220355	-0.0602436	0.509918	0.568964	0.875034	0.359584
475.126	13.3872	0.296542	0.0179094	-0.149994	0.409626	0.959383	0.76362
744.612	13.3882	-0.404621	-0.135831	0.440116	0.108116	0.560581	0.201665
498.143	13.39	-0.237568	-0.134729	0.466788	0.478139	0.684169	0.331495
745.619	13.39	-0.218115	-0.0385527	0.226538	0.229463	0.82389	0.367302
268.043	13.39	-0.182616	-0.236397	0.58316	0.493065	0.379711	0.143513
275.528	13.39	-0.0543359	-0.198622	0.556306	0.936864	0.772717	0.570364
350.103	13.3918	-0.0109981	-0.0893002	0.254405	0.977652	0.820371	0.649054
216.074	13.3923	-0.331816	0.222394	-0.0632611	0.301156	0.479984	0.885236
157.544	13.3943	-0.277035	-0.111892	0.225997	0.440199	0.751315	0.651941
992.807	13.3945	0.0375883	-0.0313132	0.0467792	0.790935	0.825095	0.815445
550.053	13.3964	0.112501	-0.129594	0.122467	0.780935	0.748902	0.830323
276.029	13.4046	-0.0332595	-0.264246	0.464694	0.925836	0.467258	0.370395
286.016	13.4215	0.359029	-0.181095	-0.447032	0.133586	0.424213	0.179815
148.546	13.4321	0.227394	-0.283837	0.0295655	0.169863	0.0964709	0.893126
259.153	13.4453	0.065814	-0.230338	-0.0750768	0.741325	0.265881	0.789777
472.68	13.447	0.441352	0.0731622	-0.350441	0.146307	0.796444	0.392743
646.305	13.456	0.351238	1.42503	-0.616965	0.33773	0.00326716	0.240968
431.875	13.458	0.480384	1.60248	-0.740729	0.251655	0.00333604	0.214824
431.541	13.458	0.195165	1.63365	-0.435829	0.641782	0.00370407	0.467207
646.808	13.468	0.198824	1.65135	-0.481917	0.629603	0.00314658	0.415163
359.691	13.4955	0.264139	0.0105961	-0.142556	0.0606667	0.932398	0.429152
265.106	13.4958	0.231946	-0.0675066	-0.337616	0.145006	0.650905	0.13507
148.039	13.5097	-0.314907	-0.19406	-0.267234	0.271441	0.487421	0.498581
230.044	13.5128	0.363379	-0.0813696	-0.306393	0.232777	0.779874	0.463606
321.674	13.5184	0.117702	-0.062687	-0.0362068	0.40779	0.654137	0.854024
551.635	13.5193	-0.33545	-0.392161	-0.139648	0.0213438	0.0102827	0.425214
620.371	13.5251	-0.196537	-0.15645	0.197742	0.240194	0.342073	0.393076
156.538	13.5373	-0.0184935	-0.355739	-0.0440668	0.86947	0.0114579	0.782215
300.682	13.5384	-0.401561	-0.136467	0.423499	0.165072	0.617659	0.287513
309.688	13.5384	-0.226556	-0.13481	0.270712	0.131881	0.347307	0.194025
618.372	13.5392	-0.872782	-0.199559	0.809834	0.146709	0.722816	0.3225
214.046	13.5399	0.14873	-0.303468	-0.331436	0.618916	0.321994	0.438554
619.374	13.5399	-0.546409	-0.156294	0.507573	0.157666	0.667509	0.33585
320.68	13.5399	-0.643899	-0.139657	0.76985	0.159915	0.745498	0.226633
543.242	13.5399	0.485116	-0.0474652	-0.623317	0.124796	0.870947	0.157934
192.066	13.5425	-0.0174585	-0.369261	-0.356305	0.917017	0.0525348	0.159319
278.175	13.5676	0.108882	0.11409	-0.663587	0.838909	0.831339	0.391885
460.276	13.599	-0.0386291	-0.239111	0.0456854	0.879819	0.362208	0.899358
283.116	13.6055	0.242493	-0.104122	-0.331615	0.286052	0.636731	0.301136
476.286	13.6094	-0.132547	-0.396355	0.26146	0.615765	0.157114	0.487259
527.052	13.6097	0.368389	0.250965	-0.726586	0.449731	0.602995	0.299939
482.262	13.6127	-0.214435	-0.402446	0.389692	0.430071	0.157471	0.316743
459.28	13.6127	-0.280219	-0.442998	0.472746	0.346189	0.152237	0.26668
481.262	13.6198	-0.327573	-0.429924	0.51617	0.239512	0.133903	0.194531
423.75	13.6206	-0.0737097	0.205849	0.243488	0.692995	0.28597	0.366941
495.237	13.6528	-0.112597	-0.226303	0.136765	0.61886	0.328773	0.668526
431.104	13.6647	0.0486771	0.652083	-0.347115	0.879657	0.0695826	0.453302
480.689	13.6752	0.230854	0.0881271	-0.472113	0.227327	0.631091	0.0952892
432.106	13.6762	0.18181	0.583031	-0.625767	0.642925	0.161	0.274791
479.689	13.684	0.0568075	0.235617	-0.418735	0.814204	0.343234	0.241143
319.165	13.6934	0.0323278	-0.0972565	-0.193902	0.864834	0.611278	0.477283
107.048	13.704	0.17173	-0.151675	-0.469849	0.564886	0.610341	0.278936
510.832	13.7116	-0.106091	0.647202	0.242943	0.759059	0.0888484	0.621172
353.158	13.7403	0.290565	0.0257375	-0.439759	0.173789	0.898056	0.148763
847.877	13.7666	0.043052	0.554314	0.589952	0.945618	0.391314	0.514516
386.251	13.7803	-0.00725021	-9.06436e-05	-0.264824	0.951606	0.999395	0.144465
147.564	13.7812	-0.0136296	-0.212458	0.0646281	0.934602	0.223392	0.783695
434.694	13.7889	0.56418	0.255014	-0.889257	0.135956	0.475122	0.101848
174.107	13.7958	0.155928	-0.0765622	-0.319344	0.341455	0.632838	0.181186
156.101	13.7995	0.363671	-0.0369122	-0.45671	0.0920247	0.850842	0.127696
385.762	13.8015	-0.670894	0.0294701	0.316163	0.233046	0.956197	0.678609
386.759	13.8021	-0.164425	0.0795582	-0.151513	0.519729	0.752947	0.672479
716.828	13.8512	0.0147193	-0.100795	0.0848548	0.865719	0.266036	0.496816
271.117	13.8851	0.23545	-0.25766	-0.077932	0.163198	0.131388	0.728604
462.112	13.8918	0.178223	0.344533	-0.829931	0.705994	0.471383	0.233907
562.317	13.9098	-0.0566005	0.0684331	0.0357231	0.772058	0.726489	0.896908
664.086	13.9116	0.0891395	-0.203556	-0.178816	0.642297	0.302472	0.51295
461.112	13.9172	0.0802028	0.390332	-0.785203	0.856034	0.388473	0.230745
664.588	13.9173	-0.334856	-0.283264	0.409105	0.124199	0.184305	0.176149
433.113	13.9224	0.270345	0.362087	-0.788201	0.650212	0.545739	0.359974
415.727	13.924	-0.0859412	-0.332759	0.331165	0.792447	0.32289	0.479666
352.717	13.9288	0.37437	0.267694	-0.00869049	0.333383	0.482685	0.986932
861.869	13.9677	0.452495	0.257854	0.251391	0.102418	0.324056	0.489462
860.865	13.9773	0.381573	0.298418	0.373861	0.226265	0.335253	0.390301
850.376	13.9773	0.162006	0.303829	0.472448	0.61829	0.359523	0.316373
850.877	13.9773	0.191768	0.286752	0.495355	0.561923	0.39205	0.301238
849.875	13.983	-0.19323	0.320784	0.829489	0.726255	0.563808	0.30299
652.359	13.9831	0.16156	0.0497428	0.332106	0.556036	0.85468	0.397918
652.865	13.9849	0.135348	0.0708741	0.409322	0.685874	0.831622	0.395847
434.915	14.0017	0.173589	0.194533	0.297171	0.587982	0.544745	0.513802
651.865	14.0018	-0.306255	0.0897964	0.839821	0.595097	0.875118	0.31452
504.298	14.0133	-0.147055	-0.40696	0.269976	0.644735	0.221548	0.551336
567.79	14.017	-0.219206	-0.010181	0.352246	0.334862	0.963157	0.277222
503.304	14.0213	-0.367461	-0.464021	0.503182	0.238428	0.146333	0.252372
525.285	14.0256	-0.383676	-0.581885	0.657502	0.191041	0.0621789	0.121726
568.792	14.0291	0.250049	0.0258827	-0.0695781	0.128116	0.864921	0.747027
218.027	14.0291	0.518587	-0.0430913	0.657735	0.220645	0.914816	0.267608
306.529	14.0434	0.338172	0.331257	-0.100407	0.0676102	0.0723079	0.669144
539.265	14.0777	0.0189056	-0.382725	0.0936011	0.932806	0.116211	0.768449
425.757	14.1357	0.311975	-0.645461	0.991493	0.486538	0.169691	0.139794
120.043	14.1378	0.0866407	-0.125483	-0.386264	0.771275	0.674658	0.370841
912.105	14.1479	0.0885662	-0.0752287	0.201913	0.660208	0.708345	0.482856
269.038	14.1943	0.108327	0.0086482	-0.367853	0.667675	0.972491	0.31582
157.085	14.207	-0.0884789	-0.267447	-0.00288929	0.597861	0.135481	0.990193
270.043	14.2173	-0.0665769	-0.300646	0.240006	0.666129	0.0777609	0.286617
197.084	14.2304	-0.0139072	-0.254573	0.0197669	0.924816	0.112493	0.924438
488.121	14.2404	-0.137175	-0.605053	0.0348739	0.445352	0.00761476	0.888836
127.537	14.242	-0.267448	-0.322951	0.356827	0.0226609	0.00936832	0.028989
748.744	14.2675	-0.121482	-0.26316	-0.131928	0.209769	0.0183051	0.325584
274.016	14.2906	0.236103	-0.0414396	-0.371928	0.358639	0.868523	0.309618
153.062	14.2922	-0.041344	-0.150834	0.0833713	0.819922	0.415718	0.745914
336.216	14.293	0.417231	0.0670302	-0.711398	0.362547	0.880569	0.277918
862.374	14.2989	0.488806	1.75413	-0.344338	0.302003	0.00418254	0.597635
125.095	14.3386	0.408916	-0.0281932	-0.449786	0.0712659	0.889586	0.1446
341.158	14.3389	0.353935	-0.0199293	-0.469306	0.134261	0.927565	0.156888
862.876	14.3439	0.244776	1.8854	-0.111801	0.622608	0.00428231	0.872809
193.084	14.3456	0.210945	-0.152417	-0.130607	0.0956111	0.209493	0.432262
513.582	14.3465	0.609857	1.97894	-0.379077	0.0523028	7.69874e-05	0.346198
512.914	14.3474	-0.0748235	2.07258	0.274396	0.911988	0.0133974	0.774903
512.58	14.3474	0.205074	2.01495	0.0156697	0.675898	0.00275301	0.981875
768.366	14.3587	0.654812	1.75651	-0.344135	0.0270142	8.83554e-05	0.344821
768.868	14.3587	0.727783	1.95033	-0.399785	0.0238241	7.21488e-05	0.311252
769.368	14.3597	0.777412	1.49611	-0.466843	0.00534024	8.49841e-05	0.14656
769.87	14.3597	0.863796	1.56279	-0.508541	0.0158078	0.00056098	0.239802
513.248	14.3621	0.509244	1.44614	-0.292262	0.0423102	0.000130676	0.356144
186.112	14.374	-0.0201326	-0.0330865	0.116806	0.937216	0.897037	0.747366
569.31	14.3813	-0.330091	-0.413431	0.49014	0.265672	0.17229	0.24438
185.542	14.3886	0.527652	-0.0158519	-0.2617	0.133755	0.96125	0.574559
303.043	14.3924	-0.162947	-0.317501	-0.147187	0.547959	0.256402	0.699163
547.325	14.3955	-0.336077	-0.415207	0.488945	0.293764	0.202521	0.281075
428.205	14.3955	0.457467	-0.0636356	-0.474954	0.204968	0.85257	0.340716
775.377	14.4225	0.306129	0.475935	-0.447483	0.0108508	0.000894721	0.00920375
690.665	14.4363	0.255013	0.656276	-0.61721	0.24286	0.0117887	0.0629867
765.659	14.4367	-0.452726	0.173482	-0.182999	0.404076	0.744392	0.807564
686.921	14.4408	-0.550001	-0.0634694	0.571816	0.102683	0.836957	0.212628
765.16	14.4446	-0.127569	-0.236477	-0.172481	0.810114	0.657493	0.81828
458.62	14.445	-0.0455767	-0.0548917	0.0891513	0.90172	0.881795	0.864439
765.911	14.4526	-0.119426	0.2447	-0.39632	0.724045	0.475084	0.415741
687.406	14.4538	-0.111033	-0.184087	0.164317	0.70173	0.528863	0.688721
764.904	14.4562	-0.120916	0.150593	-0.560386	0.74378	0.68453	0.299682
765.406	14.4622	-0.166203	0.150267	-0.453191	0.667114	0.697055	0.41441
123.525	14.4895	-0.142225	-0.263288	-0.13212	0.702835	0.485004	0.801602
770.59	14.505	-0.462634	-0.0827776	0.0345921	0.0491104	0.689284	0.905501
924.094	14.5128	-0.519078	-0.19154	-0.063577	0.0401837	0.393107	0.837526
924.488	14.5219	-0.666613	-0.23242	0.120593	0.0286365	0.380187	0.742069
924.696	14.5261	-0.419619	-0.210781	-0.0873486	0.086283	0.35478	0.780811
261.185	14.5746	-0.661824	-0.483029	0.176	0.21208	0.351264	0.805144
331.14	14.5957	0.110948	-0.345506	0.0031078	0.702041	0.251865	0.993925
260.186	14.5962	-1.2946	-0.625976	0.76006	0.0582153	0.316734	0.386025
259.386	14.6064	-1.09024	-0.813242	0.871059	0.142822	0.26005	0.385445
182.19	14.6813	-0.477685	-0.246681	0.489906	0.0436707	0.251651	0.120925
183.193	14.6813	-0.227955	-0.197746	0.277054	0.200504	0.260744	0.264856
371.134	14.6839	0.152207	-0.438887	0.188852	0.608804	0.163175	0.652787
208.097	14.687	-0.0473353	-0.0921552	-0.321356	0.806495	0.635288	0.25882
230.083	14.6925	0.0964236	-0.0511142	-0.312509	0.661989	0.815923	0.328693
867.101	14.6947	-0.319031	0.0786479	0.0954016	0.0831268	0.638668	0.68656
866.771	14.7028	-0.037229	0.102607	-0.257162	0.805901	0.503738	0.249887
296.675	14.7086	-0.0315447	-0.485736	0.405263	0.947193	0.323402	0.551991
591.359	14.7396	-0.435461	-0.539166	0.62993	0.211317	0.131024	0.20205
592.364	14.7413	-0.239495	-0.494533	0.429759	0.511422	0.193701	0.408678
613.333	14.7484	-0.290383	-0.39688	0.341672	0.270939	0.144703	0.353989
373.143	14.7485	0.266279	-0.143536	0.0262348	0.188902	0.461124	0.922768
517.597	14.7886	0.559725	0.767143	-0.278605	0.0949924	0.0318925	0.523992
496.631	14.7977	0.110406	0.276503	0.0119224	0.573752	0.180108	0.965381
496.961	14.8088	0.026317	0.349646	0.152443	0.913058	0.172741	0.656699
708.217	14.8246	0.0954764	-0.31317	-0.134229	0.555158	0.0780874	0.557438
506.224	14.8507	0.523163	0.108137	-0.619063	0.10973	0.719669	0.170685
199.128	14.8809	0.0885398	-0.114323	-0.00929029	0.533415	0.42513	0.962672
252.14	14.8946	0.179049	0.0830592	-0.397572	0.256108	0.586028	0.0910676
128.561	14.8948	0.303431	-0.10141	-0.131577	0.213277	0.663317	0.689308
293.137	14.8948	0.0643477	-0.139093	-0.165155	0.581165	0.249173	0.327283
294.14	14.9072	0.400064	-0.0130026	-0.458702	0.0826151	0.950184	0.146496
471.801	14.9326	0.482755	0.569028	-0.396596	0.0336232	0.0166092	0.175229
470.797	14.9477	0.0619851	0.35304	0.0725862	0.679003	0.0402277	0.731397
273.168	14.9712	-0.00406779	-0.152278	-0.0834195	0.96894	0.171023	0.576248
251.126	14.9718	0.138141	-0.0339135	-0.166281	0.303191	0.793897	0.376398
845.413	14.9749	-0.341069	-0.295777	0.220521	0.141677	0.195122	0.477374
846.414	14.9833	-0.218259	-0.293554	0.211789	0.320591	0.192226	0.48823
318.685	14.987	-0.235261	-0.468399	0.498443	0.599716	0.308364	0.436754
255.122	14.9949	0.395807	-0.0136192	-0.518141	0.133878	0.95564	0.161175
423.711	14.9949	-0.110029	-0.280126	0.0429211	0.673624	0.298139	0.907015
497.765	15.002	0.231397	-0.054823	-0.0396077	0.116594	0.687794	0.836716
238.109	15.0108	-0.104739	0.240413	-0.42378	0.703787	0.392077	0.292174
581.191	15.0249	-0.632848	-0.202802	-0.247845	0.00398031	0.236389	0.300799
582.198	15.0296	-0.346642	-0.187973	-0.422697	0.187774	0.457302	0.249478
808.416	15.0296	-0.0661915	-0.18629	0.141244	0.546236	0.114127	0.36961
809.408	15.0387	0.154868	-0.152705	-0.0593203	0.247236	0.253351	0.744
657.366	15.0572	-0.411797	-0.546465	0.672041	0.179288	0.0865751	0.127858
658.37	15.0648	-0.0958895	-0.463725	0.399524	0.781456	0.202681	0.422478
635.386	15.0655	-0.258988	-0.473909	0.511955	0.507552	0.240035	0.360672
449.114	15.0738	-0.135809	0.116978	-0.320002	0.70824	0.746912	0.536233
229.132	15.0745	0.271606	0.0316847	-0.384199	0.140974	0.853604	0.140893
413.214	15.0752	0.432787	-0.0445523	-0.433063	0.132528	0.867407	0.270047
479.22	15.0875	0.291814	0.0112481	-0.397549	0.148184	0.952325	0.161726
387.075	15.0938	0.445691	-0.152253	-0.57082	0.13143	0.581761	0.166596
412.21	15.0963	0.401154	0.0165399	-0.493239	0.316132	0.965915	0.379735
67.0545	15.1105	0.543795	-0.0341357	-0.483932	0.117082	0.914922	0.301176
109.101	15.1105	0.0185888	-0.17978	0.0699877	0.811682	0.0444281	0.530469
145.121	15.1105	0.141783	-0.174118	-0.086582	0.274234	0.18742	0.625931
110.104	15.115	0.529109	-0.10927	-0.403582	0.153985	0.753379	0.420407
127.11	15.1171	0.128486	-0.170048	-0.0927785	0.332812	0.209652	0.612958
792.166	15.1218	-0.157046	0.0164847	-0.063789	0.24147	0.897643	0.725773
108.769	15.1219	0.626752	-0.102242	-0.388432	0.102387	0.771206	0.442354
792.407	15.1244	0.0359617	0.122388	-0.361637	0.801569	0.40237	0.10187
245.047	15.126	-0.0257588	-0.22501	0.185924	0.895909	0.272013	0.510149
244.039	15.1403	0.218448	-0.159892	-0.21687	0.46042	0.585921	0.601063
792.943	15.1719	0.0396469	-0.0228312	-0.246502	0.84969	0.913027	0.414518
478.221	15.1758	0.465179	0.319375	-0.63193	0.278987	0.448281	0.297003
437.713	15.1849	0.217189	0.19051	0.133739	0.163915	0.215712	0.523347
714.823	15.2081	-0.284641	-0.47255	0.454601	0.408643	0.185762	0.353608
228.068	15.2164	0.120999	-0.0838043	-0.354419	0.610575	0.723135	0.304354
409.14	15.2299	0.120212	-0.133037	-0.436274	0.623317	0.587407	0.226331
448.098	15.2433	0.0652986	0.512625	-0.795361	0.899326	0.335281	0.293318
447.094	15.2439	-0.136844	0.532281	-0.667801	0.786396	0.307416	0.361836
782.398	15.2646	0.160602	-0.051718	-0.471064	0.460378	0.8091	0.146434
781.997	15.2646	-0.0977174	-0.0387778	-0.241846	0.718103	0.885679	0.53111
782.61	15.2665	-0.0759672	-0.00577531	-0.242458	0.777136	0.982787	0.527329
983.249	15.2678	0.0649959	-0.125873	-0.196377	0.78771	0.604359	0.568323
782.202	15.2712	0.0722686	-0.0860164	-0.39719	0.740849	0.694275	0.219938
982.993	15.2743	-0.321483	-0.127552	0.164186	0.338473	0.696866	0.722686
163.545	15.2743	-0.0931693	0.194467	-0.251893	0.613758	0.304976	0.344853
977.499	15.2761	-0.487835	-0.122116	0.146607	0.288346	0.783119	0.815115
977.249	15.2761	-0.503033	-0.12627	0.15963	0.288385	0.782553	0.805032
977.75	15.2761	-0.628376	-0.119239	0.282042	0.264457	0.82558	0.713219
976.997	15.2761	-0.436827	-0.136298	0.137935	0.306941	0.742259	0.813632
978	15.2761	-0.397437	-0.112131	0.0762222	0.33162	0.77803	0.892007
978.252	15.2761	-0.162632	-0.150089	-0.121482	0.565384	0.59516	0.759586
982.746	15.2761	-0.127077	-0.0932677	-0.026953	0.629118	0.722048	0.941822
978.5	15.2803	0.017807	-0.123742	-0.232961	0.930248	0.547704	0.427636
622.845	15.2821	0.415814	0.151005	-0.382352	0.336529	0.720072	0.524911
978.756	15.2832	0.127369	-0.0923004	-0.334133	0.480593	0.606487	0.207234
468.236	15.3042	0.612486	0.136238	-0.656974	0.212186	0.770661	0.333872
248.111	15.3148	0.366817	0.201013	-0.563343	0.131599	0.384342	0.105655
247.108	15.3153	0.13406	0.197329	-0.402923	0.410568	0.237095	0.102234
340.702	15.3196	-0.146005	-0.459446	0.428652	0.735614	0.303192	0.488587
446.739	15.329	-0.0510131	-0.11294	0.268091	0.653742	0.332536	0.121671
892.477	15.337	0.0142277	-0.238365	0.141119	0.937983	0.215493	0.588814
201.111	15.3468	0.3206	-0.0172618	-0.498308	0.132734	0.930412	0.103133
701.387	15.3539	-0.045183	-0.42071	0.242939	0.88812	0.213262	0.595917
291.121	15.3852	0.209457	-0.0759544	-0.207229	0.17395	0.60313	0.326988
285.133	15.4223	0.0659145	-0.263304	-0.0305486	0.723894	0.181931	0.907499
435.256	15.5074	-0.0225814	-0.40526	0.252042	0.942967	0.221827	0.576207
891.458	15.551	0.0875384	-0.0948417	-0.265821	0.678517	0.653697	0.382811
891.211	15.5635	-0.261882	-0.116287	0.0590024	0.195821	0.548312	0.827733
923.236	15.5705	-0.386625	-0.41041	0.332436	0.100744	0.0844974	0.292142
923.734	15.5705	-0.483897	-0.454902	0.508313	0.0749075	0.0905654	0.166961
362.714	15.5734	-0.220515	-0.504272	0.522703	0.624387	0.277834	0.418256
923.981	15.5748	-0.0898412	-0.39766	0.133464	0.690062	0.104555	0.675462
923.48	15.5822	-0.24996	-0.433433	0.253608	0.229293	0.0539808	0.377742
738.992	15.5834	-0.345454	-0.350171	0.297784	0.0950664	0.0913556	0.281997
702.379	15.5867	-0.120398	-0.432525	0.179072	0.555846	0.0582454	0.536087
922.982	15.5887	-0.2294	-0.374926	0.239399	0.233974	0.0685126	0.369947
705.2	15.5934	-0.339857	-0.570509	-0.0557998	0.358199	0.140391	0.912681
611.202	15.6016	-0.661534	-0.248791	-0.117686	0.000130674	0.032766	0.413789
634.191	15.6031	-0.0590106	-0.169944	-0.292471	0.772654	0.414443	0.325514
612.205	15.6194	-0.493703	-0.231186	-0.232115	0.00277779	0.0814209	0.194856
535.253	15.6214	0.357629	0.0591807	-0.578424	0.258171	0.845381	0.201341
278.263	15.628	0.567311	0.0975613	-0.671779	0.0627265	0.719862	0.108032
279.121	15.6312	-0.000132601	-0.0284154	-0.0904133	0.999523	0.898046	0.773614
280.124	15.6383	0.216085	-0.00714284	-0.271976	0.21555	0.965631	0.265597
258.142	15.6476	0.545782	0.0127368	-0.731912	0.103976	0.966908	0.120185
877.716	15.6516	-0.414599	-0.551056	0.338539	0.0732433	0.025474	0.268159
876.96	15.6517	-0.773771	-0.558111	0.668103	0.0299245	0.0938367	0.146272
701.77	15.6517	-0.502182	-0.521282	0.424828	0.0399472	0.0345486	0.180962
877.214	15.6524	-0.679276	-0.587233	0.597868	0.0315806	0.0547077	0.14419
701.972	15.6524	-0.683191	-0.520815	0.58465	0.0414798	0.101605	0.180335
877.46	15.6528	-0.388228	-0.527293	0.305937	0.0645133	0.019586	0.26671
876.712	15.6528	-0.744066	-0.587644	0.659893	0.0320384	0.0748913	0.142781
877.964	15.6539	-0.242288	-0.51147	0.230379	0.252621	0.0314905	0.431184
168.56	15.6539	0.420355	-0.143468	-0.343555	0.0430637	0.436128	0.202577
257.139	15.6539	0.265024	-0.00466709	-0.503945	0.356701	0.98668	0.224938
701.57	15.6539	-0.999272	-0.487966	0.916034	0.0817856	0.359653	0.233133
882.453	15.6554	-0.0243571	-0.425178	0.032053	0.933919	0.173649	0.938498
129.09	15.6561	0.333058	-0.122653	-0.401454	0.0741398	0.471255	0.118238
882.718	15.6651	-0.29316	-0.46779	0.370227	0.287505	0.106561	0.338711
954.231	15.6976	-0.100374	0.511689	-0.605298	0.706039	0.0813928	0.134056
953.729	15.7142	-0.135012	0.554797	-0.596496	0.627526	0.0718904	0.15367
953.985	15.7154	0.298406	0.587592	-0.932673	0.290162	0.0562695	0.0367554
259.112	15.7184	0.380876	0.254871	-0.578073	0.182676	0.357492	0.156019
699.832	15.811	0.422054	0.56783	-0.159912	0.0455376	0.0129377	0.543867
384.727	15.8339	-0.274389	-0.402187	0.569554	0.490549	0.320502	0.319884
660.027	15.8354	-0.704555	-0.249056	0.461912	0.0749931	0.490166	0.370685
427.874	15.8657	0.0493485	0.00830721	0.0611154	0.918073	0.98618	0.92822
410.575	15.8657	-0.0299142	0.019352	0.0280317	0.941871	0.962372	0.961461
625.829	15.8658	-0.0208544	-0.00228209	0.169595	0.95717	0.99531	0.758163
409.903	15.8659	-0.0486543	0.0531638	0.0423195	0.898694	0.889374	0.937567
614.347	15.8659	-0.727333	-0.0246894	0.601328	0.246669	0.967198	0.485817
614.848	15.8659	-1.26384	-0.0168034	1.15489	0.207505	0.9859	0.401428
615.347	15.8793	-0.383223	-0.0170573	0.312824	0.392629	0.968906	0.61612
453.263	15.8882	-0.0237024	0.375878	-0.353038	0.932176	0.201192	0.382043
615.85	15.893	-0.425193	-0.00526924	0.385792	0.370866	0.990914	0.559896
474.287	15.9226	-0.0249103	0.463739	0.285968	0.94942	0.257749	0.609634
474.789	15.9226	-0.428762	0.507123	0.713026	0.519173	0.448213	0.45075
475.789	15.9228	0.291873	0.532269	0.00621543	0.322117	0.0904907	0.987711
475.28	15.9358	0.379927	0.348756	-0.180943	0.0904177	0.115204	0.534972
683.344	15.936	0.234032	-0.0566454	-0.0867328	0.301762	0.796096	0.779734
335.018	15.94	0.0985217	0.755907	-1.12372	0.799877	0.0791728	0.0674779
683.85	15.949	0.0509567	0.0491178	0.0535636	0.819936	0.826308	0.865545
513.086	15.9565	-0.0470775	-0.262113	0.0635584	0.848883	0.305061	0.855644
131.048	15.9808	0.0758181	0.0693795	0.304769	0.780736	0.798857	0.436857
506.712	15.9815	-0.115288	-0.162873	0.107687	0.774078	0.685891	0.849405
859.252	15.9815	-0.060306	-0.234044	0.133514	0.877656	0.554489	0.80977
419.136	15.9816	-0.306608	-0.320446	0.278007	0.418594	0.398812	0.599472
243.103	15.9825	-0.165985	-0.30421	0.161451	0.625246	0.379185	0.735872
688.809	15.9835	-0.16142	-0.341921	0.168712	0.621502	0.308438	0.714207
244.107	15.9839	0.0364808	-0.113943	-0.110748	0.885635	0.655168	0.758086
624.213	15.9842	-0.135706	-0.125349	0.399083	0.711826	0.732776	0.448978
959.504	15.9849	-0.221717	-0.14685	0.138493	0.500312	0.652606	0.763188
958.504	15.9959	-0.373575	-0.233275	0.300704	0.301168	0.509604	0.546825
401.126	15.9989	-0.05321	-0.208516	0.0431523	0.806128	0.349254	0.887929
479.754	16.0049	-0.333977	-0.205648	0.197844	0.289205	0.504405	0.647169
420.137	16.0103	-0.17541	-0.265725	0.139274	0.58225	0.410496	0.755835
480.755	16.0103	-0.0177341	-0.177695	-0.0963876	0.959967	0.617861	0.847199
480.254	16.0104	0.652288	-0.160747	-0.766929	0.312845	0.797388	0.396678
421.139	16.0142	-0.107464	-0.217537	-0.00717696	0.581707	0.278708	0.979037
188.164	16.0337	-0.112604	-0.280761	0.275745	0.660431	0.288341	0.452416
424.21	16.0338	0.208349	0.118624	-0.261212	0.562574	0.739793	0.606893
399.036	16.0436	0.107048	-0.0948447	-0.074527	0.770305	0.795754	0.885467
197.534	16.0843	0.241472	-0.0429625	-0.176277	0.498589	0.90276	0.723947
509.212	16.09	0.0550161	0.0101036	-0.128471	0.707648	0.944846	0.538955
365.034	16.1001	-0.0881621	0.323815	-0.777152	0.843071	0.474099	0.238201
362.137	16.102	0.20311	-0.0803102	0.0428576	0.252691	0.639049	0.858652
619.223	16.1042	-0.371733	-0.022297	0.508295	0.384626	0.957361	0.399831
540.129	16.106	-0.15386	-0.124226	0.116205	0.533773	0.613825	0.73736
430.139	16.1223	-0.389598	-0.290871	0.442589	0.134407	0.248943	0.217758
833.475	16.1266	-0.123632	-0.507419	0.44077	0.81432	0.348309	0.557578
170.574	16.1276	0.304422	-0.16818	-0.222845	0.176025	0.435956	0.464377
406.754	16.1294	-0.234786	-1.38412	1.60036	0.668451	0.0306263	0.0645274
361.142	16.1297	-0.0103262	-0.0915259	0.271169	0.949491	0.578316	0.259486
210.45	16.1301	0.230722	-0.0959379	-0.0401024	0.500183	0.776538	0.932979
171.101	16.1305	-0.327335	-0.0617862	0.0865526	0.0822956	0.717517	0.720053
211.095	16.1309	-0.39692	-0.231437	0.444243	0.0277603	0.156238	0.0664083
134.546	16.1312	-0.024023	-0.301316	0.274269	0.927951	0.275526	0.472852
316.14	16.1331	0.169576	0.0228634	-0.419556	0.428639	0.913271	0.182804
155.557	16.1543	-0.102402	0.0537725	0.190857	0.55438	0.754248	0.439656
172.102	16.1547	0.0730276	-0.155364	-0.00145353	0.532423	0.202566	0.992899
212.092	16.1835	-0.0805757	0.0163573	0.401416	0.683136	0.933612	0.174141
88.0403	16.2522	0.82421	0.123311	-0.669384	0.0669159	0.759325	0.258296
428.759	16.2765	-0.193192	-0.431303	0.678535	0.505948	0.158659	0.122003
91.0537	16.2785	-0.192037	-0.295998	-0.274783	0.554522	0.369601	0.549971
362.254	16.3012	0.117052	-0.0969368	0.181018	0.709859	0.757664	0.68439
428.264	16.3555	-0.237867	-0.407872	0.45569	0.511362	0.272497	0.379118
379.209	16.3979	-0.00651812	0.451845	-1.08506	0.976854	0.0716735	0.00780713
784.756	16.4041	0.226909	0.349538	0.309327	0.470624	0.277021	0.486255
466.221	16.4338	0.458243	0.0730536	-0.465235	0.271927	0.855479	0.421578
315.145	16.4338	0.314529	-0.0162595	-0.529011	0.370798	0.962108	0.292146
270.17	16.4906	0.154739	0.0982116	-0.0995803	0.471331	0.644201	0.739706
176.07	16.5433	-0.337126	-0.35271	-0.388789	0.187814	0.170331	0.274037
477.733	16.592	0.303379	0.494495	-0.464712	0.0295927	0.00258985	0.0210762
297.984	16.5958	-0.099591	-0.4397	-0.0482008	0.794699	0.268951	0.928901
797.873	16.6332	1.1705	1.42168	-0.723814	0.0562071	0.0266662	0.357863
241.682	16.6633	0.18559	-0.199616	0.0381683	0.683825	0.661635	0.952521
121.028	16.6679	-0.145619	-0.00315874	-0.575134	0.60848	0.991057	0.174887
139.038	16.6872	-0.379434	-0.0129365	-0.444473	0.142286	0.957111	0.214563
213.113	16.7095	0.368495	0.225707	-0.926035	0.165237	0.376951	0.0265045
186.221	16.7412	-0.488868	-0.0540004	0.508967	0.141203	0.861375	0.263784
187.223	16.7448	-0.0465683	-0.0269718	0.121724	0.469066	0.671461	0.197735
231.159	16.7491	0.5509	0.0170573	-0.795574	0.063822	0.948569	0.0594548
207.16	16.7508	0.521382	0.0162543	-0.632412	0.123659	0.95854	0.178285
332.212	16.8732	-0.0175713	-0.166417	0.0384349	0.907137	0.287155	0.856908
331.21	16.8758	-0.29001	-0.230248	0.354631	0.0761546	0.144675	0.116378
940.688	16.929	-0.42681	-0.639047	-0.661266	0.148859	0.0437447	0.118245
941.353	16.9375	-0.690266	-0.485551	-0.222407	0.132779	0.272974	0.712935
941.02	16.9375	-0.287167	-0.504631	-0.871824	0.239779	0.0561461	0.0259925
942.021	16.9428	0.0411401	-0.45532	-1.01435	0.877229	0.115517	0.0238957
224.094	16.9602	0.138048	0.00751535	-0.0408936	0.169942	0.93658	0.760156
178.086	16.9638	0.135061	0.0103409	-0.0418007	0.250204	0.926712	0.793021
246.077	16.966	-0.0202374	-0.0210658	0.234882	0.883986	0.87928	0.251406
835.46	16.9668	-0.153688	0.0452497	0.051798	0.330471	0.768117	0.811193
843.13	16.9675	-0.0664906	-0.112399	0.245169	0.656678	0.457694	0.263198
842.786	16.9798	-0.0275874	-0.0383191	0.167302	0.862772	0.810434	0.466
836.804	16.9857	0.228427	0.166042	-0.313698	0.147291	0.277107	0.157851
836.459	16.9913	0.238703	0.0879755	-0.365417	0.24298	0.654602	0.209539
788.929	16.9923	-0.0304084	0.12297	0.0744518	0.929155	0.720256	0.877733
912.483	16.9925	-0.0367017	4.32145e-05	0.0982633	0.920872	0.999907	0.850954
789.931	16.9925	0.172657	0.109694	-0.118611	0.657056	0.77705	0.82841
608.322	16.9927	0.0803162	0.196615	-0.142249	0.693842	0.346934	0.623017
608.666	16.9948	-0.230868	0.0120431	0.296576	0.511613	0.972298	0.550082
607.995	16.9948	-0.439871	0.0442313	0.423347	0.312806	0.916412	0.48444
911.481	16.9948	-0.205064	0.00591898	0.235349	0.564334	0.986579	0.638701
911.984	16.9948	-0.339059	-0.0198627	0.41342	0.397693	0.959541	0.463245
789.428	16.9948	0.0746984	0.0682405	-0.010589	0.82514	0.840001	0.982303
295.153	16.9974	-0.0528196	-0.200632	0.113081	0.833461	0.433194	0.750703
868.46	17.0026	0.550147	0.0615994	-0.50142	0.267638	0.897171	0.464643
867.968	17.0186	0.434919	0.0801939	-0.428458	0.422323	0.879954	0.572065
529.102	17.021	-0.0706299	-0.0515576	-0.218805	0.747497	0.813913	0.486187
688.382	17.027	0.436743	0.176227	-0.512594	0.383244	0.719387	0.4659
738.404	17.027	0.0366048	0.147125	0.012457	0.899856	0.615755	0.97583
739.402	17.0324	0.518649	0.188416	-0.501909	0.0820587	0.490792	0.210859
687.882	17.0358	-0.696705	0.20101	0.617844	0.280869	0.747223	0.489019
738.907	17.0378	-0.270513	0.171723	0.336511	0.477193	0.648599	0.530282
688.886	17.0378	-0.186384	0.252551	0.129394	0.677465	0.574834	0.837526
498.83	17.1965	0.774287	0.66652	-0.238548	0.0856956	0.130094	0.680691
202.212	17.1985	0.145032	-0.0253351	-0.0160562	0.640337	0.934496	0.970614
203.217	17.2058	0.603026	0.000961213	-0.473459	0.0938591	0.997657	0.322132
418.008	17.2251	-0.315136	-0.305663	0.286996	0.228513	0.241553	0.425453
956.507	17.2313	0.199729	0.114083	-0.473888	0.388734	0.616764	0.164781
691.854	17.2323	0.462279	-0.0785705	0.262833	0.192813	0.815098	0.583227
505.102	17.2342	0.0232322	0.112058	-0.620708	0.906995	0.57684	0.0522279
530.83	17.2342	0.184687	0.771547	0.00493345	0.602219	0.0531746	0.992074
692.362	17.2351	0.84167	-0.0459625	-0.260427	0.0940716	0.919947	0.688664
264.114	17.2353	0.525226	0.127387	-0.541126	0.0294579	0.539048	0.0900915
531.328	17.2399	0.486231	0.666716	-0.312417	0.0793961	0.0248745	0.388038
531.832	17.2399	0.597717	0.824396	-0.387486	0.0710384	0.020836	0.368116
537.789	17.255	0.659056	0.0252113	-0.628379	0.170209	0.955439	0.339331
536.304	17.255	0.130979	0.0485081	-0.255582	0.610633	0.849337	0.485626
263.106	17.2622	0.25164	0.0733456	-0.284489	0.0289439	0.460961	0.0664141
536.797	17.264	-0.082617	-0.0127112	0.00200048	0.821474	0.97226	0.996912
435.13	17.2792	0.517651	0.307509	-0.594141	0.321234	0.547438	0.415787
697.826	17.2865	0.204623	-0.302605	0.0698053	0.49266	0.31875	0.866632
436.13	17.2923	0.505591	0.22701	-0.557278	0.255031	0.597002	0.367254
478.747	17.3057	0.528556	0.171583	-0.581124	0.14121	0.610526	0.240051
163.075	17.322	0.0310383	-0.059148	-0.0799517	0.705245	0.476359	0.495452
955.493	17.329	0.434898	0.293026	-0.574114	0.0609921	0.18031	0.0764208
392.243	17.365	0.380704	0.0876549	-0.638923	0.321994	0.814089	0.245703
198.147	17.3807	-0.116286	-0.0483332	0.00219415	0.232276	0.605744	0.986664
170.154	17.3817	0.363751	0.00907468	-0.446667	0.218597	0.974246	0.279794
892.729	17.3885	0.0551905	0.499684	-0.715687	0.754629	0.0190366	0.017978
155.106	17.3945	-0.0529683	-0.0813256	0.00308789	0.532396	0.345787	0.979201
126.549	17.4115	0.462758	-0.171182	-0.263942	0.285221	0.682991	0.656468
359.205	17.4178	0.286378	0.0285996	-0.5328	0.371209	0.926955	0.247929
336.254	17.4271	0.27326	0.0387127	-0.484914	0.424926	0.908131	0.322278
376.235	17.469	-0.00433898	-0.214605	0.0504205	0.984595	0.353364	0.874043
844.726	17.483	-0.0709398	0.0819277	-0.119287	0.719157	0.678363	0.669518
844.394	17.4834	0.450211	0.0438571	-0.611748	0.177192	0.888944	0.192869
419.26	17.4838	-0.331616	-0.747815	0.894226	0.498032	0.148157	0.212958
89.059	17.4838	0.182541	-0.0543031	-0.179771	0.0831302	0.572221	0.205401
382.193	17.4845	0.27312	0.0374108	-0.294528	0.220594	0.860109	0.340633
71.0493	17.4845	0.207408	-0.0731306	-0.202683	0.116182	0.551821	0.258215
845.06	17.489	0.506455	0.0986345	-0.647671	0.222082	0.803028	0.265478
381.189	17.5	-0.0686954	0.0285828	-0.0118041	0.818282	0.923732	0.977691
305.137	17.5327	-0.0365704	0.0538898	0.348056	0.882225	0.827331	0.333438
242.176	17.5615	0.00510069	-0.0610329	-0.0745758	0.923146	0.267693	0.333468
644.351	17.5727	-0.287195	-0.180778	-0.227347	0.249035	0.456473	0.506249
644.027	17.5735	-0.733754	-0.416945	0.0145535	0.0786976	0.285366	0.97815
448.213	17.5746	0.405461	0.351002	-0.593361	0.2126	0.27471	0.198619
645.027	17.5792	-0.190664	-0.0742369	-0.570093	0.547567	0.813012	0.220953
644.695	17.603	-0.536389	-0.0934869	-0.285056	0.138559	0.781604	0.553623
471.737	17.6204	0.270861	0.162459	-0.177523	0.0910056	0.282557	0.399354
351.017	17.649	-0.120767	0.707832	-0.722937	0.754266	0.0941353	0.207499
302.044	17.6992	0.239376	-0.162784	-0.230112	0.171397	0.33683	0.337026
220.156	17.7085	0.281384	-0.244332	-0.299957	0.119147	0.168197	0.224856
595.207	17.7351	-0.641987	-0.290341	-0.100995	4.70194e-05	0.00717764	0.404102
597.216	17.7362	-0.378169	-0.164709	-0.0258694	0.00481567	0.131317	0.856571
184.115	17.7388	-0.0569426	0.0362854	0.388925	0.867536	0.915312	0.429651
596.214	17.7397	-0.646061	-0.291068	0.071617	7.61017e-05	0.0103155	0.577789
141.554	17.7656	0.467053	-0.205062	-0.331254	0.236192	0.589329	0.538667
225.105	17.7669	-0.128703	-0.109973	0.0625912	0.510795	0.572732	0.818872
324.15	17.7707	0.364545	0.0992853	-0.489084	0.277873	0.759297	0.301495
254.14	17.7871	0.234269	-0.00723411	-0.516427	0.102002	0.955925	0.0205602
323.147	17.7986	-0.292311	0.0821597	0.103404	0.606404	0.883936	0.896618
253.143	17.8007	0.00781384	-0.0511615	-0.322225	0.96823	0.7947	0.265124
185.117	17.8198	-0.00295495	-0.142955	-0.082062	0.980063	0.247576	0.626319
301.165	17.8605	0.349263	0.0736808	-0.56975	0.445887	0.869895	0.382142
387.202	17.8623	0.0966095	-0.109951	-0.279708	0.804265	0.77803	0.614153
184.169	17.8822	-0.0465165	-0.0649822	-0.0437254	0.851899	0.794459	0.901179
466.277	17.9217	0.526228	0.101027	-0.478489	0.108585	0.73777	0.279088
465.772	17.9476	0.539421	0.430432	-0.195866	0.0609523	0.120267	0.59115
117.542	18.0371	1.13397	0.293613	-0.83154	0.137902	0.680787	0.417585
833.09	18.0443	0.247699	0.194932	-0.641203	0.245265	0.352637	0.0508461
265.045	18.0856	-0.161729	-0.0457178	0.0947446	0.450816	0.828309	0.751062
123.08	18.1235	0.0434704	-0.0230056	-0.162153	0.857513	0.924243	0.637913
813.228	18.1415	0.527711	0.0741692	-0.287811	0.186328	0.84408	0.592466
775.489	18.2965	1.02685	0.328663	-0.835826	0.227944	0.686998	0.473864
930.481	18.2973	0.134895	0.32954	0.0524779	0.727518	0.403674	0.92336
845.985	18.3073	0.0161568	0.358814	0.228239	0.966093	0.358579	0.672905
971.814	18.3078	0.0377169	-0.078563	0.0732994	0.86044	0.715124	0.809256
845.833	18.3113	-0.0441799	0.307391	0.283628	0.90683	0.425049	0.598408
930.173	18.3167	-0.132391	0.304407	0.308013	0.71209	0.404844	0.546781
930.684	18.3167	-0.116136	0.333812	0.318169	0.771037	0.41203	0.575801
845.7	18.3262	-0.194618	0.312046	0.454079	0.604801	0.412933	0.400127
288.215	18.3313	-0.666614	-0.622152	0.266304	0.194554	0.222904	0.699662
190.086	18.3461	-0.845166	-0.45894	0.452455	0.00347731	0.0570148	0.159997
130.064	18.3508	-0.669971	-0.427236	0.300992	0.0207416	0.104329	0.388128
246.021	18.4491	-0.410914	-0.688758	0.350526	0.207233	0.0504649	0.431828
390.255	18.4982	-0.251034	-0.503805	0.253693	0.36882	0.092357	0.515383
389.252	18.5143	-0.428249	-0.558355	0.518279	0.103915	0.0437288	0.155077
844.191	18.5398	-0.242612	-0.235834	0.434896	0.33174	0.344633	0.226692
367.269	18.5405	-0.0898397	-0.526924	0.273153	0.82457	0.215979	0.635623
137.062	18.5847	-0.0819835	-0.235044	0.0853946	0.481937	0.0674377	0.601844
105.081	18.6553	-0.134576	-0.364557	0.0125484	0.481341	0.0804657	0.962361
873.128	18.6857	0.36556	-0.0820003	-0.107801	0.356699	0.831841	0.843491
873.335	18.7147	0.145957	-0.0524984	0.0645563	0.669281	0.877264	0.893155
970.595	18.7157	-0.764225	-0.110297	0.982239	0.241141	0.859568	0.283143
970.818	18.7157	-0.86027	-0.114771	1.09147	0.229531	0.866531	0.2768
873.842	18.7157	0.14331	-0.0725313	0.0741847	0.691322	0.840124	0.883927
874.04	18.7157	0.208109	-0.00878649	-0.0340777	0.544416	0.979334	0.943374
970.454	18.7162	-0.613898	-0.10304	0.819385	0.266007	0.845932	0.29177
970.036	18.7168	-0.273555	-0.0402841	0.382082	0.449894	0.909758	0.455312
873.64	18.7168	-0.363162	-0.0672148	0.597204	0.429114	0.881319	0.36121
971.041	18.7297	-0.30627	-0.114294	0.534093	0.44537	0.772169	0.351291
80.0487	18.772	0.583268	-0.0725247	-0.482032	0.105033	0.825937	0.316698
161.154	18.7751	0.236814	-0.217445	-0.0522431	0.300808	0.339508	0.867288
69.0702	18.7751	0.259038	-0.0751604	-0.207333	0.141455	0.648612	0.382851
162.171	18.8012	0.601177	-0.0744798	-0.423713	0.111469	0.83018	0.398722
201.167	18.8268	0.247007	-0.105148	0.00548893	0.274728	0.631131	0.985752
200.164	18.827	-0.106612	-0.162956	0.249844	0.276766	0.112269	0.0891608
248.168	18.8568	-0.223096	-0.0285416	-0.720177	0.537443	0.936336	0.17961
948.593	18.8887	-0.0237894	-0.118516	0.0624223	0.937927	0.69939	0.885167
968.56	18.9843	-0.145039	0.326285	0.0695276	0.631669	0.294793	0.870058
968.36	18.9988	-0.47897	0.354797	0.390315	0.325083	0.459728	0.562495
968.705	18.9988	-0.357039	0.340838	0.24644	0.407687	0.428395	0.681004
968.928	18.9988	-0.115905	0.373786	0.0309417	0.710131	0.249326	0.94382
230.175	19	0.0951573	-0.0811907	-0.103792	0.598425	0.652369	0.683496
212.164	19	0.110951	-0.0929075	-0.120983	0.572088	0.635093	0.661774
570.342	19.012	0.306104	0.128421	-0.396575	0.582381	0.816068	0.613862
572.347	19.0192	0.738618	0.290395	-0.773646	0.176317	0.575875	0.303944
571.345	19.026	0.461078	0.181575	-0.559145	0.377781	0.722638	0.44646
215.128	19.049	0.581283	-0.18266	-0.590982	0.130694	0.611066	0.260607
621.068	19.3118	0.254198	0.167166	-0.848299	0.34681	0.529436	0.0460584
828.422	19.3183	-0.466554	0.153186	-0.112639	0.157361	0.622328	0.79672
835.743	19.3189	-0.0407108	0.313237	-1.27422	0.921294	0.455323	0.0540008
835.415	19.3212	0.0248724	0.0548834	-0.402813	0.912287	0.808245	0.229181
829.425	19.3212	0.185829	0.115875	-0.675167	0.239723	0.451193	0.0114726
621.817	19.3212	0.387994	0.193662	-0.936356	0.191821	0.496962	0.0410286
621.568	19.3295	0.272813	0.180609	-0.825025	0.326472	0.508544	0.055852
829.09	19.3295	0.0994664	0.185405	-0.675297	0.583133	0.317571	0.0252437
828.088	19.3348	-0.0875157	0.17792	-0.502336	0.588644	0.285205	0.0515505
827.754	19.3348	-0.100376	-0.907349	0.574368	0.886708	0.220333	0.568215
828.757	19.3348	-0.0110694	-0.762915	0.352047	0.985601	0.235345	0.68645
868.197	19.351	0.382941	-0.00753986	-0.948535	0.282243	0.982446	0.0781503
867.937	19.351	0.184595	0.0155419	-0.790943	0.528844	0.95716	0.0812132
867.438	19.354	0.0043156	-0.0413078	-0.60434	0.979307	0.804307	0.0292662
867.188	19.3591	-0.194323	-0.0650999	-0.35974	0.17547	0.631901	0.0875574
867.688	19.3591	-0.693781	-0.0462168	0.0702469	0.102378	0.905252	0.898213
866.936	19.3657	0.166101	0.000680989	-0.761246	0.513134	0.99783	0.0574043
902.119	19.378	0.208974	0.0323408	-0.492012	0.555071	0.926407	0.335187
320.259	19.5065	0.465642	0.0723243	-0.943191	0.191633	0.830232	0.0753453
363.214	19.5133	-0.0593752	0.685405	-0.891732	0.825299	0.0300393	0.0417037
321.261	19.5222	0.657608	0.0944521	-1.11098	0.113205	0.804822	0.0663456
912.966	19.5628	-0.357815	-0.162966	0.0735364	0.19922	0.54167	0.843917
913.469	19.5672	-0.299366	-0.150728	-0.0302188	0.230783	0.532051	0.928516
913.217	19.5672	-0.634364	-0.154549	0.304818	0.184435	0.732585	0.634914
913.978	19.5708	-0.282872	-0.164232	-0.00767455	0.24084	0.483024	0.981205
289.142	19.5715	-0.0899766	-0.0565163	-0.106616	0.641361	0.768879	0.69572
913.72	19.5715	-0.200968	-0.160916	-0.112006	0.267623	0.36802	0.651214
267.16	19.5733	0.23096	0.0420099	-0.45516	0.389521	0.872669	0.240521
268.163	19.575	0.36746	-0.0117242	-0.526101	0.169445	0.962752	0.164825
215.535	19.5808	0.568072	-0.151591	-0.668515	0.223907	0.73409	0.304574
216.196	19.581	-0.143491	-0.267728	0.00635268	0.304952	0.0750861	0.973469
290.144	19.6001	0.195439	-0.0248425	-0.352214	0.163891	0.850388	0.0865694
217.194	19.6008	0.159993	-0.209217	-0.311052	0.489276	0.371032	0.348285
239.164	19.7403	0.243747	0.0200733	-0.509866	0.264849	0.923775	0.114094
279.158	19.7623	0.00621081	-0.0448755	-0.234142	0.967287	0.767623	0.292045
221.153	19.7765	0.371683	0.0317266	-0.59011	0.169482	0.900624	0.128479
299.186	19.8174	0.250433	0.0108223	-0.603049	0.322386	0.964765	0.110257
402.279	19.8212	0.227071	0.0705014	-0.57365	0.411112	0.794562	0.159961
893.66	19.8638	0.058624	-0.147676	-0.0517424	0.716093	0.370275	0.819973
673.591	19.8648	-0.159344	-0.158891	0.141575	0.372928	0.374218	0.56962
685.819	19.8657	0.060164	-0.0427524	0.110179	0.809836	0.8641	0.755642
904.449	19.8657	0.153886	-0.185658	-0.0552846	0.596	0.524134	0.891939
903.446	19.8666	-0.0111009	-0.233367	0.138916	0.962949	0.343176	0.682673
898.123	19.8733	-0.228293	-0.224723	0.24084	0.347234	0.354406	0.47763
672.841	19.8733	-0.487169	-0.216649	0.453998	0.168576	0.519831	0.347765
897.79	19.8733	-0.501898	-0.214187	0.475878	0.226875	0.591703	0.405729
903.781	19.8736	-0.55653	-0.1958	0.666689	0.183354	0.622196	0.25231
673.344	19.8736	0.115063	-0.174578	-0.122362	0.346642	0.167722	0.473659
672.34	19.8798	-0.262032	-0.183344	0.224013	0.243013	0.403515	0.467939
673.094	19.8801	-0.0454636	-0.170908	-0.00101937	0.777215	0.303226	0.996411
896.119	19.8803	-0.333375	-0.222284	0.266036	0.213759	0.39411	0.467841
672.591	19.8803	-0.147844	-0.1942	0.0820957	0.392909	0.269605	0.732087
897.455	19.8815	-0.395034	-0.198428	0.355357	0.23374	0.53576	0.436343
904.786	19.8832	-0.21012	-0.243445	0.374657	0.486025	0.422052	0.384077
904.114	19.8832	-0.218845	-0.215	0.342971	0.451429	0.459134	0.40594
896.454	19.8832	-0.339863	-0.226301	0.274884	0.180619	0.357347	0.425904
896.788	19.8832	-0.338401	-0.235677	0.304561	0.188538	0.346103	0.387055
897.121	19.8832	-0.264954	-0.212657	0.204617	0.238887	0.336939	0.506762
673.84	19.8841	-0.0174255	-0.0992683	0.0616442	0.925406	0.597068	0.815103
321.168	19.9173	-0.0185936	-0.0471374	-0.191768	0.913346	0.783093	0.436478
157.121	19.9211	0.232787	0.378036	-0.379539	0.560657	0.353104	0.503868
568.325	19.9217	0.402906	0.0817095	-0.514154	0.464157	0.879979	0.507546
118.551	19.9432	0.638554	0.364865	-0.843098	0.183255	0.429307	0.210871
275.661	19.9488	0.799551	0.0895309	-0.81776	0.181531	0.873908	0.32083
139.111	19.9497	0.37073	0.215433	-0.488572	0.14584	0.376579	0.171681
243.159	19.9561	0.370579	-0.0179317	-0.668242	0.188743	0.946284	0.104337
322.178	19.9625	0.243543	-0.0463333	-0.424567	0.205406	0.79977	0.127725
327.143	19.9639	0.399141	0.116407	-0.63876	0.281198	0.744776	0.227314
265.142	19.9689	0.0664919	-0.00196614	-0.338637	0.739362	0.992122	0.249912
595.345	20.0788	0.27862	0.283919	-0.595255	0.43055	0.422188	0.245229
447.293	20.0892	-0.225163	-0.364841	0.27595	0.301006	0.110972	0.366031
448.293	20.0935	0.0980152	-0.356598	-0.0874331	0.742812	0.251525	0.835686
594.342	20.1014	0.328335	0.505054	-0.755069	0.413731	0.221418	0.198541
425.307	20.1061	0.0540119	-0.415047	0.0517809	0.849897	0.171478	0.897853
359.26	20.1393	0.280317	0.559451	-0.931993	0.391871	0.108501	0.0660198
358.259	20.1818	0.089442	-0.00145607	-0.595843	0.734091	0.995571	0.136093
288.957	20.2048	0.54776	-0.0389895	-0.702704	0.127783	0.906736	0.161878
284.962	20.2048	0.405056	-0.0410291	-0.597796	0.172205	0.883059	0.156323
308.938	20.2057	0.246956	-0.0275508	-0.316906	0.0841586	0.831431	0.111434
306.941	20.2085	0.0959947	-0.0705183	-0.230398	0.499873	0.617759	0.264762
286.959	20.2095	0.368719	-0.0473498	-0.566747	0.211763	0.865969	0.178419
373.219	20.2147	0.0950365	-0.179002	-0.139288	0.50136	0.221404	0.486402
173.153	20.2408	0.136349	-0.0560311	-0.121511	0.401308	0.725134	0.591778
513.363	20.3244	0.00137424	-0.958504	0.942576	0.998557	0.229381	0.391973
486.366	20.349	-0.140978	-0.810452	0.669739	0.817672	0.207996	0.44662
579.369	20.387	-0.213187	-0.75116	0.836075	0.708549	0.209383	0.313994
334.274	20.387	0.458274	-0.00789685	-0.82275	0.176754	0.980259	0.0967967
265.179	20.4137	0.239577	0.0516124	-0.367177	0.140741	0.733803	0.114406
189.163	20.4426	0.57018	0.086372	-0.737475	0.110598	0.792713	0.139519
185.153	20.4432	0.161517	-0.11138	-0.43186	0.358474	0.520625	0.102742
574.415	20.5003	0.0543424	-0.471291	0.0380502	0.907245	0.327461	0.953982
530.369	20.5008	0.143932	-0.540247	-0.0217571	0.780647	0.311159	0.976194
487.353	20.5033	-0.153692	-0.171024	-0.0396218	0.297359	0.249985	0.844057
190.161	20.5033	0.364793	-0.105575	-0.367431	0.249397	0.728554	0.402173
244.439	20.5033	0.629499	0.117315	-0.677025	0.158591	0.779364	0.270978
266.173	20.5033	-0.337921	-0.143439	0.321338	0.218265	0.586169	0.395196
245.193	20.5033	-0.138748	-0.153801	0.00822455	0.216653	0.175375	0.956545
227.181	20.5033	-0.10253	-0.116559	-0.0739975	0.366761	0.308474	0.638505
208.169	20.5033	0.100999	-0.111358	-0.221262	0.569912	0.531941	0.385583
510.357	20.5114	-0.0715605	0.0675895	0.0623066	0.80367	0.81432	0.878203
226.181	20.5114	-0.346319	-0.154491	0.163383	0.0598945	0.35715	0.485832
180.174	20.5114	0.0985359	-0.0831477	-0.250418	0.552109	0.614676	0.297105
225.49	20.5114	0.285007	-0.0367047	-0.387435	0.220579	0.868376	0.237338
243.44	20.5146	0.192841	-0.117589	-0.276949	0.449333	0.640667	0.44259
528.36	20.5176	0.44432	-0.241504	-0.506258	0.209896	0.479854	0.303971
244.191	20.5242	-0.365467	-0.174861	0.178671	0.065006	0.336327	0.481026
529.365	20.5283	0.201958	-0.34146	-0.274344	0.691829	0.506752	0.703287
198.178	20.5308	0.0820068	-0.0485333	-0.237609	0.501693	0.688096	0.187456
586.384	20.5312	0.46416	0.0518174	-0.809305	0.175032	0.872175	0.103879
330.136	20.5398	0.0582946	0.188907	-0.439621	0.789776	0.397732	0.179731
572.377	20.5509	0.38669	-0.134	-0.48948	0.2752	0.695475	0.325114
457.364	20.5851	0.232819	0.109602	-0.476266	0.356767	0.657516	0.194928
596.357	20.6128	0.41688	0.512552	-0.643993	0.137061	0.0766684	0.108729
213.529	20.667	0.323248	0.0705706	-0.344531	0.261742	0.798745	0.389409
236.162	20.668	-0.0969699	-0.0504841	0.169534	0.681526	0.830146	0.612949
347.212	20.6687	0.155643	0.125377	-0.719313	0.654365	0.717742	0.167145
214.18	20.6687	-0.25491	-0.0820691	0.162242	0.0933151	0.556792	0.416308
361.202	20.6698	0.160179	0.585819	-1.33788	0.460301	0.0219281	0.00180039
215.18	20.6842	0.0513584	-0.0638222	-0.173999	0.628585	0.549413	0.262723
317.163	20.7551	-0.170716	-0.0439183	0.0383765	0.248195	0.756865	0.848002
315.164	20.7551	-0.180785	-0.0824123	0.0487121	0.175375	0.517032	0.784154
433.243	20.7699	-0.263516	-0.410965	0.377947	0.369802	0.176629	0.363409
197.153	20.7847	0.192282	-0.0205202	-0.368484	0.258528	0.899925	0.137921
293.174	20.8176	0.214761	0.0352721	-0.43169	0.303097	0.861055	0.156381
271.19	20.8398	0.452973	0.0978106	-0.824018	0.185458	0.762419	0.0993972
464.281	20.8419	0.516554	-0.321835	-0.416911	0.0637276	0.217107	0.2546
318.279	20.9058	-0.0191397	-0.361643	-0.0560762	0.923216	0.096998	0.84189
500.318	20.9108	0.343681	-0.381253	-0.2675	0.195637	0.155892	0.459442
169.158	20.962	0.570023	0.0496786	-0.74776	0.0927463	0.872025	0.114635
237.184	20.9702	0.314248	-0.0904906	-0.51929	0.160135	0.667522	0.108024
152.153	20.9713	0.89591	-0.0785419	-0.941484	0.0632225	0.854819	0.147875
360.279	21.0068	0.109972	-0.0281674	-0.620779	0.709032	0.92353	0.161242
462.267	21.0098	0.483669	-0.506445	-0.426434	0.0810345	0.0700349	0.248615
516.3	21.015	0.348143	-0.788805	-0.088263	0.21809	0.0163444	0.816645
517.303	21.015	0.432667	-0.660866	-0.249977	0.1272	0.0316466	0.506581
498.289	21.0415	0.496051	-0.60343	-0.254569	0.114672	0.0634539	0.538627
518.302	21.0415	0.456113	-0.542102	-0.224279	0.134915	0.0835207	0.579057
149.025	21.0766	0.272965	-0.199335	-0.185679	0.294738	0.436639	0.604375
150.025	21.0795	0.521671	-0.170195	-0.369627	0.182215	0.646413	0.485138
333.207	21.1382	-0.138664	-0.0372985	-1.24441	0.419301	0.824604	0.00064386
924.587	21.1449	0.57887	-0.296609	-0.919979	0.24012	0.533774	0.191684
384.275	21.2074	0.462386	0.454485	-1.16162	0.23437	0.241762	0.0516914
373.273	21.217	0.23851	0.163592	-0.548647	0.57264	0.697204	0.366729
519.312	21.219	0.211735	-0.338337	-0.111721	0.430123	0.2209	0.764472
483.354	21.2553	-0.0315449	-0.712002	0.479623	0.933169	0.0865687	0.379413
506.334	21.2553	0.13501	-0.260134	-0.14348	0.612009	0.339005	0.702053
505.334	21.2617	-0.0358789	-0.302035	0.0140057	0.867136	0.183952	0.963137
484.357	21.2637	0.131877	-0.411499	-0.0328716	0.715981	0.273273	0.948653
501.383	21.2663	0.188813	-0.401938	-0.0428519	0.572795	0.246083	0.92715
593.386	21.269	-0.0683644	-0.867169	0.701899	0.900728	0.141065	0.377264
549.361	21.276	-0.239577	-0.783458	1.10769	0.739782	0.293355	0.293472
199.168	21.2974	0.211186	-0.100158	-0.366235	0.156895	0.47997	0.0917505
181.158	21.2974	0.385177	0.0623556	-0.724554	0.0871528	0.760463	0.0320047
332.294	21.362	0.502702	0.0776508	-0.853544	0.117114	0.793043	0.0680259
263.164	21.4102	0.218505	-0.116205	-0.291042	0.25347	0.53122	0.279911
415.233	21.4485	0.524195	-0.000916727	-0.728967	0.206994	0.998143	0.213923
431.266	21.4597	0.211431	-0.0894618	-0.291773	0.259246	0.621268	0.270042
298.204	21.5083	0.25518	0.234275	-0.603901	0.322996	0.361881	0.116
315.264	21.5182	-0.37519	-0.222586	0.168183	0.101377	0.304186	0.573652
392.286	21.5204	0.340793	0.12826	-0.526616	0.515791	0.804512	0.478821
391.283	21.5218	0.233833	0.149658	-0.41837	0.635558	0.76064	0.550531
316.267	21.5302	0.0699763	-0.230515	-0.243914	0.842542	0.518123	0.626662
277.144	21.5485	0.160998	0.0824577	-0.538072	0.133093	0.416756	0.00423011
274.274	21.5708	0.338765	-0.0986483	-0.391552	0.16948	0.671778	0.252178
255.16	21.6028	0.230116	0.0443791	-0.711675	0.344362	0.85116	0.0592151
256.17	21.6122	0.428273	0.0210256	-0.788305	0.110444	0.931956	0.0477219
254.372	21.6158	0.753758	0.172282	-1.2073	0.0510612	0.614486	0.0317911
441.267	21.6232	0.422138	-0.0520756	-0.558347	0.0859732	0.815246	0.104493
251.166	21.6628	0.278788	0.0319359	-0.484808	0.171241	0.867576	0.10176
534.32	21.7038	-0.0919093	-0.428849	0.173778	0.858707	0.415941	0.812026
213.177	21.7156	0.242207	-0.255472	-0.454339	0.150725	0.13226	0.0681203
272.187	21.7278	0.155443	0.325107	-0.98179	0.246051	0.0307536	0.000516179
176.152	21.7423	0.247028	-0.287444	-0.249507	0.49877	0.433607	0.626505
478.365	21.7563	0.401227	-0.259006	-0.202769	0.343418	0.533876	0.728271
477.37	21.7563	-0.119552	-0.0993113	0.263041	0.753665	0.794137	0.626962
301.284	21.7642	-0.254318	-0.515147	0.393261	0.301606	0.0557133	0.261774
302.284	21.7667	-0.0346536	-0.411431	0.221555	0.904702	0.180516	0.591687
250.178	21.7672	-0.242596	-0.132998	0.381393	0.381381	0.625276	0.333255
228.196	21.7682	-0.430612	-0.19681	0.288364	0.0483299	0.318431	0.302406
229.198	21.7682	-0.19658	-0.150365	0.0848413	0.0964677	0.187754	0.581334
211.169	21.7682	0.00714982	-0.128834	-0.139644	0.94016	0.200301	0.315933
193.158	21.7682	0.0657436	-0.137658	-0.170854	0.622106	0.314469	0.373815
227.495	21.7682	0.191319	-0.00894776	-0.274603	0.366092	0.96536	0.359357
228.497	21.7693	0.356979	0.0599928	-0.420296	0.248871	0.839682	0.330813
194.161	21.7803	0.260003	-0.0871126	-0.315363	0.274709	0.704688	0.344029
159.157	21.7827	0.257143	0.0211443	-0.0835287	0.485589	0.953539	0.870811
158.153	21.7846	-0.0234756	-0.0449335	0.210206	0.931854	0.87007	0.591654
285.288	21.7953	-0.328962	-0.437533	0.366334	0.345924	0.219557	0.45308
177.162	21.8122	0.8114	0.116056	-0.83274	0.00992013	0.6436	0.0406316
241.182	21.824	0.295839	-0.0794111	-0.505395	0.065689	0.583019	0.0329104
289.291	21.8285	-0.117834	-0.192913	-0.149846	0.71812	0.557335	0.74529
288.289	21.85	-0.20392	-0.195525	-0.0335617	0.519914	0.536805	0.939496
577.358	21.8745	0.00764365	-0.557195	0.203642	0.978771	0.0803678	0.619027
245.267	21.8752	0.052055	-0.134255	-0.00110675	0.856506	0.642957	0.997829
407.279	21.9295	0.598138	0.497287	-0.771616	0.196975	0.27566	0.235162
244.263	21.9312	-0.1353	-0.285655	0.229783	0.650918	0.350138	0.587958
542.399	21.9473	0.110275	-0.348871	-0.0736785	0.692803	0.231103	0.851358
564.38	21.9749	-0.015214	-0.273503	0.0518364	0.942978	0.221203	0.863292
541.393	21.9757	-0.00746349	-0.383601	0.080176	0.980116	0.222853	0.850014
563.376	21.9856	-0.145927	-0.309564	0.180757	0.49336	0.166379	0.54712
286.278	21.9857	-0.0427559	-0.237437	0.0858822	0.863857	0.354257	0.807772
467.42	22.0118	0.455499	-0.148991	-0.469684	0.0990482	0.558608	0.210798
240.193	22.0323	0.127675	-0.0766674	-0.217038	0.332927	0.553258	0.250575
215.257	22.0945	-0.3641	-0.386882	0.68539	0.583708	0.56088	0.469066
223.1	22.1012	-0.0150331	0.207025	-0.160521	0.938142	0.302191	0.562184
177.059	22.1025	-0.0809895	0.0424844	0.0965321	0.602181	0.783152	0.659606
245.08	22.1073	-0.0750269	0.0769941	0.288553	0.695326	0.687832	0.301544
176.515	22.1073	0.354384	-0.0169905	-0.214895	0.313838	0.960169	0.657193
214.253	22.1215	-0.390059	-0.460561	0.792148	0.425418	0.350451	0.262295
502.294	22.1577	0.399194	-0.176925	0.273597	0.496144	0.760102	0.738615
439.361	22.201	0.0820077	-0.357688	-0.120532	0.795464	0.276049	0.787655
171.173	22.2836	0.367877	-0.210101	-0.299196	0.213184	0.462048	0.459045
752.496	22.3633	0.0504197	-0.461427	-0.0606869	0.851349	0.114449	0.87324
751.502	22.3643	-0.0632307	-0.476922	-0.0304803	0.837709	0.14915	0.944272
705.564	22.3644	0.013345	-0.396515	-0.134223	0.956465	0.132761	0.699218
773.491	22.3655	-0.0158425	-0.111497	-0.0436739	0.946446	0.638797	0.895869
753.5	22.376	-0.0963365	-0.602371	0.417596	0.806682	0.152383	0.460442
774.495	22.3803	0.226173	-0.0845292	-0.27201	0.443626	0.770962	0.512521
376.26	22.3873	-0.298733	-0.312321	0.132913	0.152851	0.13725	0.632586
377.262	22.3873	-0.132534	-0.25576	-0.0263706	0.452646	0.166178	0.914303
378.264	22.3877	0.11317	-0.167716	-0.286956	0.621822	0.468923	0.384593
704.573	22.3878	-0.0563464	-0.495782	-0.0221504	0.838305	0.100718	0.954708
398.243	22.3891	-0.162422	-0.120432	0.15693	0.441477	0.564829	0.595211
393.284	22.3903	0.031125	-0.133373	-0.129523	0.856089	0.445399	0.596593
394.282	22.3918	0.0802188	-0.167943	-0.183652	0.617244	0.308146	0.424478
660.47	22.4037	0.13188	-0.643362	0.122188	0.733187	0.123329	0.822899
327.008	22.4163	0.488871	0.0698245	-0.677364	0.0834237	0.784817	0.0887507
329.016	22.4177	0.454547	-0.00125269	-0.61244	0.0905029	0.995898	0.104092
179.178	22.4532	0.495163	0.0191894	-0.537078	0.192153	0.957333	0.306438
524.462	22.4768	0.387143	-0.356802	-0.338911	0.198501	0.232384	0.410747
523.459	22.4904	0.2854	-0.364447	-0.175505	0.223499	0.130477	0.581887
225.184	22.5377	0.299373	-0.246803	-0.400357	0.0904311	0.151202	0.106215
340.357	22.579	-0.36186	-0.658475	0.849345	0.317501	0.0883541	0.114796
616.461	22.5808	0.0944672	-0.279387	-0.123084	0.74891	0.355837	0.767964
622.418	22.5959	0.0298264	-0.188864	-0.0765923	0.896315	0.419098	0.813177
621.419	22.5962	0.0138558	-0.246644	-0.00660928	0.943486	0.229137	0.980921
453.371	22.6333	0.208896	-0.389342	-0.0149007	0.430561	0.160421	0.96763
270.304	22.6453	0.312016	-0.204856	-0.11879	0.440457	0.608576	0.832503
369.262	22.768	0.455739	-0.229487	-0.653826	0.232311	0.533439	0.226226
254.21	22.786	0.359462	-0.02755	-0.614642	0.202443	0.917876	0.131724
172.169	22.7922	0.345783	-0.150549	-0.236644	0.168792	0.528623	0.485018
617.181	22.8167	-0.452572	-0.890906	1.57667	0.501885	0.203667	0.121465
494.325	22.8765	0.0142685	0.144262	0.55641	0.984002	0.839554	0.58405
313.237	22.8806	0.366409	-0.0655636	-0.709784	0.216675	0.81637	0.103494
616.177	22.8878	-0.633399	-0.607231	1.48754	0.306054	0.325174	0.106952
618.184	22.9005	-0.334457	-0.873377	1.43332	0.62704	0.223595	0.164323
257.206	22.9394	0.376792	-0.139281	-0.591438	0.0970457	0.506976	0.0704975
304.298	23.0348	-0.135242	-0.532028	0.283188	0.662451	0.112467	0.521112
679.459	23.0907	0.0807722	-0.25772	-0.171453	0.726541	0.281089	0.601443
674.503	23.0984	0.213131	-0.352794	-0.246473	0.469024	0.243826	0.551553
430.388	23.1105	-0.171749	-0.817429	0.299155	0.819573	0.294451	0.778953
680.457	23.1148	0.13222	-0.239551	-0.220937	0.601153	0.35305	0.538228
219.175	23.115	0.534591	-0.0687249	-0.54561	0.06736	0.792599	0.165457
272.294	23.1708	0.050529	-0.138253	0.552143	0.904932	0.744578	0.368732
242.282	23.3012	-0.0205639	-0.357768	0.873934	0.973433	0.566527	0.332033
289.181	23.329	0.353323	-0.44018	-0.4717	0.24561	0.15716	0.27085
387.269	23.3555	0.350513	-0.0107047	-0.602189	0.16776	0.964185	0.102605
432.886	23.4	0.343017	-0.847772	0.355872	0.540627	0.15287	0.651694
256.263	23.5153	0.681903	0.0667937	-0.577822	0.122791	0.870009	0.331534
520.341	23.5343	-0.65466	-0.0709176	1.51279	0.690795	0.965452	0.519281
715.524	23.578	0.293812	-0.329018	-0.309731	0.425317	0.374433	0.548676
737.501	23.5947	0.262549	-0.260645	-0.30029	0.334916	0.338229	0.430731
331.285	23.6003	0.181534	-0.313109	-0.0873156	0.473388	0.230566	0.804496
282.278	24.0433	0.367171	-0.364984	-0.282007	0.30901	0.311714	0.571513
280.264	24.2668	-0.164951	-0.435849	-0.0531945	0.824238	0.561052	0.959546
587.483	24.3208	0.379156	-0.1613	-0.19186	0.108503	0.464308	0.536174
326.379	24.3209	0.209315	-0.299355	0.472119	0.621137	0.483256	0.436071
588.489	24.3212	0.430492	-0.114112	-0.247778	0.156222	0.689167	0.541967
402.357	24.4543	0.10371	-0.0974313	0.671388	0.832298	0.842285	0.34591
399.253	24.4543	-0.173206	-0.678271	0.40196	0.6322	0.0872191	0.437883
503.359	24.4605	0.298948	-0.0549139	-0.414722	0.229238	0.817028	0.237439
539.42	24.96	0.335005	-0.0840547	-0.333666	0.277406	0.777407	0.43553
561.398	24.9673	0.241495	0.00274538	-0.412209	0.419884	0.992524	0.334794
