# Supplementary material for: Transcriptomic and metabolomic profiling of long-lived growth hormone releasing hormone knock-out mice: evidence for altered mitochondrial function and amino acid metabolism
Source: Aging (Albany NY). 2020 Feb 23;12(4):3473–85. doi: 10.18632/aging.102822 (PMC7066919; doi:10.18632/aging.102822)
Supplement: Supplementary Table 8 [file aging-12-102822-s002..xlsx]

## Sheet: Table S8 Negative pvalues
Supplementary Table 8. Negative ionization mode metabolite linear model pvalues.
Mass/charge ratio	Retention time	Sex Estimate	Genotype Estimate	Interaction Estimate	Sex P-value	Genotype P-value	Interaction P-value
78.9608	5.02937	0.192755	0.0765614	-0.127518	0.491977	0.782136	0.7449
194.046	5.10208	0.102752	0.0746995	-0.0576515	0.615408	0.713886	0.840926
199.036	5.15138	0.196351	0.118404	-0.185938	0.314259	0.535452	0.492618
166.034	5.16116	-0.105645	0.0580491	0.304014	0.570904	0.753751	0.263599
154.921	5.16595	0.0772598	-0.0416246	0.145437	0.689983	0.829222	0.596923
199.805	5.18807	-0.583505	0.251822	0.724011	0.288367	0.636762	0.347619
197.808	5.18825	-0.58097	0.23892	0.741524	0.306882	0.665469	0.353477
96.9621	5.19117	-0.049441	-0.159334	0.292378	0.874766	0.614192	0.51541
162.985	5.19247	0.291252	-0.0172888	0.0787169	0.157571	0.928534	0.773312
135.031	5.19272	-0.0222148	-0.195048	0.128102	0.888627	0.240004	0.571802
195.811	5.19272	-0.550347	0.253218	0.686312	0.329245	0.645447	0.386411
194.937	5.20023	0.0354721	-0.019329	0.0107568	0.873635	0.930899	0.972773
106.024	5.20643	0.191297	-0.20063	0.0369559	0.221777	0.202098	0.860874
105.02	5.21827	-0.0109142	-0.204725	0.329627	0.912056	0.0649617	0.0409253
216.912	5.22705	-0.0888158	0.303653	0.206828	0.743525	0.280217	0.592248
224.971	5.22705	0.145972	-9.09831e-05	0.168769	0.37045	0.999543	0.460204
386.032	5.28195	-0.338517	0.29233	0.0798414	0.162917	0.221117	0.804197
75.0111	5.34703	0.0890704	-0.402897	0.199362	0.765222	0.19975	0.637941
57.9787	5.386	1.23435	0.0981152	-0.170496	0.00279894	0.744189	0.688976
229.048	5.39689	-0.0764333	-0.43344	0.632058	0.804602	0.185029	0.173167
145.015	5.66701	0.153381	0.277772	-0.605115	0.604655	0.357717	0.171191
118.999	5.77117	-0.020887	-0.417306	0.256933	0.944863	0.191777	0.552062
133.015	6.09537	-0.15045	-0.213142	0.495231	0.630386	0.498659	0.277846
134.018	6.13654	0.0524112	-0.110713	0.153099	0.85266	0.695945	0.702302
87.0102	6.20183	-0.0588494	-0.0781609	0.0513119	0.825944	0.770504	0.892047
457.938	6.20981	-0.287531	-0.0389559	-0.0425768	0.508276	0.927567	0.943984
355.908	6.21835	-0.0108099	0.0597532	-0.0606079	0.979065	0.884748	0.917171
435.957	6.22396	-0.455723	-0.162332	0.0608323	0.194696	0.627741	0.897025
245.947	6.22865	0.0588406	-0.14312	-0.160803	0.859566	0.668511	0.733147
547.933	6.23354	-0.0634097	-0.120038	-0.116124	0.863893	0.746162	0.824442
289.936	6.23965	-0.0170898	-0.13102	0.0233431	0.955278	0.669084	0.956804
279.907	6.24387	-0.182208	0.151843	-0.0417001	0.623964	0.682155	0.936277
467.885	6.24444	0.0884824	0.0211632	-0.0740436	0.83565	0.960372	0.902209
191.02	6.2451	-0.266103	-0.13671	0.223103	0.196368	0.489631	0.427637
302.996	6.25059	-0.0546276	0.015444	-0.0353343	0.831668	0.952015	0.922461
436.957	6.25345	0.101834	0.0239979	-0.115208	0.794383	0.950923	0.834715
414.973	6.25481	0.155593	0.0399536	-0.162075	0.631889	0.901403	0.723278
192.023	6.25786	-0.0900246	-0.108079	0.0162859	0.71978	0.667267	0.963244
445.903	6.26429	0.0755842	-0.0463305	-0.100116	0.821658	0.889992	0.832757
405.027	6.27096	-0.208998	-0.0913613	0.0402158	0.576458	0.805523	0.938805
333.926	6.27185	-0.248476	-0.170575	0.0529334	0.295343	0.464193	0.870248
149.009	6.29828	-0.160793	-0.365549	0.320577	0.612018	0.264575	0.478183
346.055	6.7725	0.306926	-1.02123	3.22461	0.760859	0.325298	0.0474347
182.013	6.92002	0.282748	-0.10557	0.349543	0.488148	0.793019	0.543028
293.989	6.92433	0.536142	0.00715815	-0.0180255	0.221538	0.986312	0.975629
128.036	7.00797	0.0600233	0.193832	0.0368101	0.827127	0.486961	0.924455
168.024	7.32468	-0.146972	-0.0953859	0.178817	0.690777	0.795672	0.731827
183.016	7.32468	0.0196284	-0.216432	0.0964419	0.957562	0.5617	0.853475
167.021	7.32691	-0.274869	-0.198812	0.399139	0.42	0.555733	0.408182
257.016	7.35255	-0.414272	-0.414784	0.455783	0.275065	0.274517	0.388692
229.021	7.3752	-0.238586	-0.357796	0.305164	0.498318	0.31855	0.539164
338.065	7.90378	-0.0733526	-0.639907	0.34397	0.870805	0.181088	0.592875
723.117	7.9314	-0.0320432	-0.535191	0.209676	0.936423	0.206484	0.713234
322.071	7.93199	0.0531356	-0.653023	0.237975	0.905595	0.170901	0.708386
701.131	7.93199	0.0742555	-0.509602	0.0976675	0.871436	0.284607	0.880345
611.144	7.93238	-0.333343	-0.605944	0.74645	0.471059	0.206382	0.265278
612.147	7.93243	-0.238159	-0.576686	0.598052	0.610746	0.235588	0.374517
306.076	7.93243	-0.213954	-0.590066	0.495892	0.611039	0.182562	0.411044
655.107	7.93248	0.0214426	-0.431656	0.36919	0.960802	0.337235	0.55417
59.0168	7.93248	0.228381	-0.148274	-0.617578	0.447983	0.618473	0.165617
709.109	7.93324	0.0849639	-0.477128	0.106695	0.848712	0.300672	0.865457
613.143	7.93324	-0.202152	-0.577472	0.529811	0.667327	0.238278	0.432323
633.126	7.93329	-0.164315	-0.513708	0.569298	0.701512	0.249339	0.358853
635.122	7.9341	0.0100367	-0.428735	0.295594	0.982293	0.356664	0.646222
745.096	7.9341	0.150849	-0.39926	0.161779	0.699844	0.321004	0.769545
634.126	7.9341	-0.0570763	-0.45333	0.320805	0.902648	0.345341	0.629343
333.058	7.96008	-0.499079	-0.288306	0.1725	0.358791	0.589251	0.817909
279.037	7.96571	-0.522737	-0.0995241	0.289394	0.281418	0.831455	0.663174
312.942	7.97192	0.26984	0.131387	0.0493321	0.300799	0.604816	0.889826
281.034	7.97683	-0.330937	-0.0887551	0.125177	0.451399	0.837172	0.837608
243.062	7.97777	-0.355454	-0.252009	0.0554167	0.451879	0.590394	0.932674
174.067	7.97912	0.342552	0.0146218	-0.275009	0.0504028	0.92418	0.2278
404.024	8.01853	0.340433	-0.238731	0.261035	0.288339	0.448172	0.554625
139.014	8.03672	0.148165	-0.378366	-0.123815	0.465638	0.0861514	0.662812
242.064	8.04313	0.407984	-0.0759137	-0.431935	0.0720027	0.709886	0.159464
304.062	8.05785	-0.012783	-0.713053	0.978357	0.97712	0.137449	0.147976
216.041	8.06899	0.450234	0.320655	-0.469525	0.179997	0.326005	0.310231
151.026	8.07188	-0.191949	-0.184616	-0.294513	0.815713	0.82261	0.800439
297.983	8.0722	0.56102	0.224935	-0.449535	0.107247	0.487796	0.334138
198.074	8.07248	0.563139	0.0243619	-0.451757	0.0633288	0.928032	0.256437
238.025	8.07253	0.499044	0.25551	-0.503888	0.122116	0.401917	0.252129
181.07	8.07258	0.42946	0.130167	-0.481916	0.17327	0.662491	0.269552
180.066	8.07258	0.365954	0.161798	-0.366078	0.142604	0.492666	0.283304
104.042	8.08473	0.21323	-0.150659	-0.390525	0.401072	0.54841	0.283977
103.041	8.09019	-0.043062	-0.159097	-0.114568	0.788082	0.334469	0.615183
169.026	8.09084	0.194017	-0.387148	-0.139487	0.516694	0.212868	0.7391
152.037	8.09118	0.0837872	-0.381632	-0.132024	0.812038	0.295413	0.791137
196.025	8.0997	0.358799	-0.0967548	-0.311864	0.0797874	0.603302	0.252637
84.0107	8.10688	0.218335	-0.430943	-0.0161575	0.511326	0.211959	0.972191
173.01	8.16257	-0.279286	0.239132	-0.123906	0.427539	0.494587	0.7998
171.037	8.17393	0.234749	-0.0935088	-0.0755469	0.28152	0.657777	0.799365
148.944	8.17587	0.339334	-0.0838862	-0.170338	0.167152	0.716975	0.604357
141.031	8.192	0.215054	-0.386491	-0.0593613	0.49127	0.231019	0.891522
161.024	8.19758	0.0875317	0.0305567	-0.134021	0.546568	0.831564	0.514768
129.015	8.20373	-0.0408397	0.139357	-0.109288	0.87703	0.600516	0.770131
292.116	8.21007	0.322248	0.364945	-0.520109	0.258524	0.205665	0.202518
252.946	8.24473	0.00545072	0.557637	-0.281473	0.98962	0.20698	0.637235
260.015	8.28903	0.324778	0.107644	-0.31767	0.170088	0.630755	0.32757
302.065	8.31583	0.103628	-1.00681	1.93279	0.885211	0.185644	0.0849215
312.086	8.31764	0.145418	-0.625809	1.09482	0.787116	0.26378	0.175386
263.032	8.36538	0.0202853	0.141296	-0.112522	0.940708	0.607466	0.771066
282.08	8.58909	0.029947	-0.681156	0.870166	0.964614	0.328271	0.374519
268.075	8.58909	-0.0567708	-0.55738	0.0751178	0.943738	0.494977	0.947353
267.073	8.58909	-0.138277	-0.386881	0.193112	0.893143	0.708163	0.894468
480.565	8.73348	0.264772	-1.0625	1.13778	0.73039	0.189967	0.30974
324.071	8.74602	-0.521787	-0.514498	0.436002	0.0361131	0.0381446	0.175652
653.152	8.83775	0.28239	-0.856229	0.84338	0.520239	0.075798	0.193349
675.129	8.84073	0.350952	-0.520271	0.47436	0.365854	0.193099	0.386378
810.402	8.88387	0.27736	-0.378029	-0.68002	0.767081	0.68716	0.609647
131.035	8.88741	-0.396379	-0.193272	-0.0304669	0.292562	0.597773	0.952676
488.563	8.89794	0.503689	-0.747935	0.734009	0.523529	0.350954	0.511308
210.981	8.9081	-0.138743	-0.0537464	-0.137743	0.579292	0.828499	0.69565
338.051	8.95871	-0.319813	-0.167572	0.476338	0.214984	0.500449	0.193856
999.42	9.00922	-0.682267	-0.127497	0.558951	0.039135	0.657576	0.191472
999.924	9.00922	-0.629117	-0.132985	0.513302	0.0450645	0.629511	0.208252
176.054	9.10435	0.451791	0.0783109	-0.211869	0.163192	0.796841	0.624357
115.041	9.14935	0.233141	0.0785803	-0.0481193	0.298109	0.717355	0.875012
588.106	9.26946	-0.15821	-0.530487	0.49696	0.781857	0.365035	0.542474
596.136	9.32019	0.0712389	-0.121014	0.583263	0.86248	0.768985	0.330677
147.006	9.37504	0.131059	0.0610396	-0.0553713	0.491707	0.745815	0.834952
144.059	9.38033	-0.875994	-1.08816	0.787016	0.0831023	0.0393776	0.244005
277.068	9.39077	-0.00236297	0.341182	-0.154972	0.98306	0.0133384	0.33944
291.959	9.40693	0.244083	0.0961339	-0.264325	0.170638	0.569616	0.282289
467.03	9.40787	0.366369	0.190892	-0.269681	0.212663	0.500451	0.500885
339.937	9.41953	0.383738	0.274857	-0.26158	0.0885182	0.202378	0.377396
165.072	9.41958	0.158405	0.057752	-0.198615	0.283209	0.685951	0.337611
359.011	9.41962	0.12152	0.293729	-0.296948	0.593391	0.215812	0.364799
469.031	9.41962	0.355004	0.33128	-0.299031	0.0608909	0.0763775	0.23037
397.902	9.42953	0.433411	0.300406	-0.329476	0.0909704	0.219711	0.331983
164.072	9.43177	0.00205192	0.0593713	0.00177675	0.988149	0.669222	0.992744
232.061	9.43412	0.218346	0.00192804	-0.113639	0.172644	0.989774	0.596619
279.975	9.43953	0.311453	0.263181	-0.301725	0.0731284	0.1196	0.19549
337.943	9.43983	0.458913	0.404983	-0.413613	0.0573026	0.0859336	0.195087
224.024	9.43983	0.289616	0.14256	-0.254082	0.0502558	0.289829	0.191003
163.552	9.44052	0.307961	-0.0101293	-0.276721	0.142554	0.958654	0.331701
222.03	9.44623	0.205687	0.152419	-0.158036	0.0689193	0.158253	0.286868
887.377	9.44807	-0.759434	-0.356222	0.755815	0.0680674	0.351692	0.176208
888.381	9.44837	-0.625728	-0.356244	0.623681	0.0372849	0.193399	0.116837
887.88	9.44867	-0.614679	-0.378161	0.609596	0.0323683	0.150436	0.107447
507.127	9.45388	-0.376197	-0.0915698	0.198478	0.157122	0.713844	0.576345
309.998	9.4608	0.212665	-0.0730592	-0.235121	0.232476	0.668942	0.342093
888.888	9.4608	-0.240832	-0.257819	0.04107	0.0308283	0.0231687	0.760466
344.117	9.4608	0.189338	0.214709	-0.302239	0.249204	0.196469	0.198338
357.995	9.46773	0.375905	0.0538589	-0.227226	0.0881718	0.787956	0.430736
159.066	9.47153	0.363553	0.100362	-0.481402	0.171999	0.689685	0.197785
97.0674	9.47186	0.646473	0.206773	-0.884387	0.0817994	0.542272	0.0904441
300.048	9.47218	0.366861	0.0722138	-0.35374	0.0999319	0.723765	0.240395
326.118	9.47493	0.111607	0.00920367	-0.338519	0.622253	0.967335	0.3038
669.148	9.52048	0.107232	-0.628656	0.454182	0.824746	0.216592	0.512508
691.124	9.52048	0.263716	-0.384817	0.132279	0.552613	0.392177	0.831502
278.065	9.61025	0.0390283	0.201168	-0.341535	0.781612	0.177697	0.113957
286.083	9.6481	-0.046439	-0.0722127	-0.349874	0.834461	0.745701	0.283266
276.067	9.66237	-0.0115193	0.165457	-0.381264	0.941461	0.308144	0.114105
254.075	9.67175	-0.0119913	0.114738	-0.4618	0.941636	0.490362	0.0736781
218.102	9.69663	-0.211713	0.038473	-0.330026	0.264071	0.832689	0.222111
309.102	9.69949	-0.117656	0.0799934	0.115625	0.489621	0.635715	0.628388
195.035	9.72206	0.212461	0.02901	-0.346154	0.349786	0.895496	0.285694
483.082	9.73293	0.192777	-0.114766	0.260121	0.506462	0.68973	0.52563
219.085	9.75727	-0.00918969	-0.196251	-0.228744	0.952569	0.226356	0.311541
143.07	9.76596	0.359642	-0.034959	-0.546295	0.252779	0.907597	0.222164
382.099	9.83485	-0.633865	-0.429095	0.44796	0.146255	0.307744	0.444566
981.499	10.0216	-0.779534	-0.412055	0.156946	0.0961505	0.348217	0.795206
716.556	10.0566	0.508	0.00859484	-0.206135	0.15845	0.979649	0.667213
718.551	10.0572	0.295558	-0.134592	-0.205724	0.42263	0.710396	0.688399
536.679	10.0707	0.301389	-0.047478	-0.18542	0.214888	0.837262	0.574043
894.91	10.0765	-0.00486739	-0.107505	-0.0271676	0.954771	0.232271	0.823146
532.667	10.0777	0.27046	0.0551429	-0.153408	0.190853	0.778187	0.582284
530.671	10.0778	0.228032	-0.00249394	-0.148057	0.301694	0.990662	0.625928
714.55	10.0808	0.458869	0.0929473	-0.352294	0.121091	0.734441	0.374003
818.324	10.0848	0.0491224	0.108092	0.0124918	0.571864	0.230807	0.918206
197.808	10.0848	0.0995757	0.0825061	0.0577165	0.578521	0.644248	0.818382
534.667	10.0848	0.283746	-0.0240021	-0.128044	0.243317	0.91777	0.698261
195.811	10.0848	0.132706	0.10552	0.00718901	0.480652	0.572671	0.978091
348.78	10.0848	0.132827	0.0630588	-0.0350854	0.335857	0.639947	0.853104
330.794	10.0849	0.162874	-0.0168267	-0.154531	0.308915	0.913394	0.486848
350.785	10.0849	0.214973	0.0812057	-0.142782	0.222035	0.630406	0.551325
406.74	10.0878	0.28695	0.0905396	-0.158305	0.20015	0.671189	0.600814
404.741	10.0956	0.324243	0.118027	-0.226804	0.160959	0.589287	0.466738
402.745	10.0987	0.365937	0.0692998	-0.263771	0.155211	0.773889	0.446884
441.735	10.1005	0.216817	-0.142798	-0.110369	0.360381	0.54071	0.735947
199.805	10.1005	0.16062	0.0891134	-0.0556329	0.365822	0.609277	0.820277
304.794	10.1012	0.195668	0.0188493	-0.101469	0.222975	0.901864	0.64104
408.749	10.1041	0.346466	0.091556	-0.266696	0.126149	0.663847	0.379922
302.794	10.1061	0.22435	0.0297419	-0.137106	0.183371	0.85171	0.546654
324.798	10.1061	0.0449422	0.0161986	0.0363554	0.593104	0.846038	0.758401
326.795	10.1061	0.0439931	0.0069355	0.0268792	0.601372	0.933782	0.820143
322.801	10.1061	0.0688897	0.0102478	-0.0262104	0.502979	0.919477	0.85504
328.794	10.1061	0.0939487	0.00308017	-0.0417782	0.401466	0.977538	0.78762
449.664	10.1069	0.0981574	0.0260821	-0.0126778	0.517635	0.861757	0.952232
344.786	10.1078	0.189928	0.0922716	-0.114702	0.225786	0.541551	0.59052
451.658	10.1078	0.0785761	0.0463676	-0.0427942	0.565601	0.732775	0.82329
224.851	10.1092	0.25254	0.0893699	-0.225447	0.313572	0.71344	0.516406
276.818	10.111	0.47677	0.243984	-0.27527	0.142511	0.429375	0.525359
414.698	10.1116	0.203107	-0.0287236	-0.134081	0.108159	0.804603	0.423112
236.823	10.1116	0.434846	0.0279068	-0.306035	0.208034	0.932122	0.514765
300.802	10.1116	0.215958	0.00573074	-0.154565	0.20938	0.971991	0.509207
306.789	10.1116	0.266327	0.0565573	-0.183594	0.226856	0.788065	0.541233
346.781	10.1124	0.141913	0.0789932	-0.0482591	0.26712	0.525388	0.781536
464.73	10.1125	0.387974	0.168187	-0.320546	0.135754	0.492567	0.360897
453.658	10.1125	0.136401	0.0246882	-0.0410774	0.451356	0.889597	0.8703
447.67	10.1125	0.139749	-0.0159417	-0.0616447	0.41905	0.924976	0.797181
469.741	10.1134	0.232148	-0.0778993	-0.213611	0.356969	0.751334	0.542552
455.655	10.1151	0.194051	0.0370443	-0.178697	0.345154	0.852902	0.531934
324.737	10.1156	0.346799	0.0872387	-0.254172	0.121716	0.674771	0.395895
234.823	10.1156	0.411867	0.128178	-0.320759	0.192249	0.669377	0.455511
161.897	10.1156	0.175199	0.0298994	-0.0373762	0.179922	0.808316	0.830133
165.9	10.1215	0.197793	-0.0134624	-0.156833	0.287941	0.940148	0.541175
326.734	10.1221	0.353676	0.0802718	-0.390925	0.15703	0.732196	0.25705
405.83	10.123	0.287968	-0.0184964	-0.461643	0.226612	0.935019	0.175899
416.752	10.1243	0.282023	0.0766318	-0.239736	0.161351	0.68601	0.380747
325.732	10.1243	0.064935	0.0625687	0.0132953	0.665187	0.67655	0.949739
321.738	10.1243	0.109519	0.075542	-0.032976	0.470771	0.615727	0.875959
218.856	10.1245	0.202901	0.0803022	-0.0590128	0.182908	0.579748	0.771911
323.735	10.131	0.0587786	0.0626347	0.0440518	0.701062	0.682682	0.838237
327.729	10.131	0.136978	0.0599968	-0.0562281	0.398283	0.70613	0.802179
163.895	10.131	0.166208	0.0138279	-0.0325561	0.190254	0.908155	0.847811
280.813	10.1311	0.427982	0.149579	-0.294534	0.0836338	0.509459	0.364547
278.817	10.1345	0.422194	0.171595	-0.213232	0.0911696	0.457732	0.512368
329.729	10.1386	0.255544	0.0208253	-0.175048	0.250682	0.922097	0.565217
353.83	10.1398	0.209739	-0.118949	-0.107401	0.289278	0.537825	0.69191
345.791	10.1398	0.320964	0.0646058	-0.257138	0.201036	0.786254	0.452711
178.864	10.1403	0.334681	0.106306	-0.261846	0.132975	0.60969	0.381903
220.853	10.1403	0.204885	0.11129	-0.0798431	0.125298	0.379672	0.649742
222.85	10.1403	0.237696	0.0881296	-0.118054	0.145472	0.566419	0.586676
162.894	10.1406	-0.0882277	0.0106003	0.284724	0.398855	0.91737	0.0764338
160.897	10.1406	-0.090757	0.00781091	0.288931	0.387124	0.939191	0.0734814
164.891	10.1406	-0.0112573	0.0122282	0.180676	0.852732	0.840227	0.0612533
119.909	10.1406	0.202608	-0.0151504	-0.109121	0.193043	0.917982	0.603081
186.895	10.1409	0.294236	-0.0395672	-0.183295	0.156024	0.838493	0.509872
228.89	10.1409	0.301921	-0.00192508	-0.157989	0.159243	0.992346	0.581552
338.777	10.1416	0.48888	0.194207	-0.311198	0.10495	0.488421	0.434446
288.82	10.1419	0.281858	0.0401505	-0.123982	0.22059	0.854591	0.690256
160.397	10.1437	0.278172	0.0525696	-0.174592	0.108195	0.741371	0.445459
174.866	10.1441	0.290733	0.0604874	-0.176499	0.120624	0.727195	0.477256
336.776	10.1455	0.473963	0.221647	-0.229158	0.125408	0.446684	0.574655
282.825	10.1455	0.31976	0.0687208	-0.329168	0.168148	0.753028	0.30208
162.388	10.147	0.22829	0.0388479	-0.157557	0.213389	0.823827	0.527951
347.798	10.1506	0.295177	0.109282	-0.339997	0.198149	0.617467	0.286128
206.904	10.1506	0.235428	0.0287213	-0.12685	0.173781	0.860001	0.58508
122.899	10.1518	0.133131	0.00428347	-0.00901367	0.164017	0.961891	0.943326
116.547	10.1518	0.220538	0.00583586	-0.131109	0.199799	0.971406	0.57309
305.783	10.155	0.416442	0.177574	-0.454743	0.177394	0.545847	0.286472
168.062	10.1556	0.319045	0.485735	-0.48013	0.336466	0.15815	0.308257
383.748	10.1582	0.136798	-0.0386081	-0.131965	0.463302	0.833355	0.613558
351.832	10.1587	0.163169	-0.110368	-0.0546715	0.32288	0.496348	0.809184
118.905	10.1587	-0.10652	-0.0160282	0.309923	0.350189	0.885022	0.0755385
116.908	10.1587	-0.103059	-0.0196011	0.306745	0.349316	0.854755	0.0697916
120.902	10.1587	-0.0250682	-0.00899467	0.206598	0.703564	0.890952	0.0505802
117.912	10.1587	0.22778	0.00649242	-0.129581	0.156129	0.965506	0.546456
118.538	10.1587	0.216257	0.020357	-0.127113	0.201275	0.898953	0.578696
121.906	10.1592	0.296866	-0.00883626	-0.170191	0.183497	0.966495	0.571338
120.529	10.1592	0.319411	0.0204809	-0.230549	0.147659	0.920676	0.437031
164.38	10.1592	0.360247	0.0366751	-0.294967	0.11871	0.863231	0.341312
230.884	10.1615	0.266494	-0.00446762	-0.115771	0.173296	0.98062	0.6583
308.814	10.1662	0.283921	0.0152836	-0.245886	0.0992012	0.922512	0.2865
385.747	10.1675	0.24016	0.101595	-0.27938	0.245109	0.610076	0.332329
381.754	10.1675	0.196814	-0.035302	-0.157784	0.333188	0.858038	0.575423
290.811	10.1705	0.417773	0.0723538	-0.23945	0.0811241	0.738601	0.442126
296.879	10.1716	0.276299	-0.0312758	-0.168767	0.163376	0.86639	0.526029
342.958	10.1729	0.175321	0.249455	-0.138005	0.197811	0.0807332	0.4569
343.794	10.1729	0.283074	-0.026292	-0.211565	0.190331	0.897551	0.471199
341.798	10.1766	0.263605	0.0155715	-0.155742	0.226659	0.940233	0.599204
660.691	10.1858	0.164993	0.137843	-0.13388	0.502719	0.573842	0.697747
333.766	10.1858	0.238863	0.091238	-0.13326	0.293961	0.679246	0.66946
331.768	10.1867	0.224215	0.0705248	-0.139402	0.320092	0.747391	0.653631
340.96	10.1894	0.229934	0.25033	-0.150871	0.1224	0.0968431	0.446066
335.764	10.1958	0.271879	0.00861562	-0.0890416	0.357744	0.976089	0.826886
681.69	10.1984	0.330516	0.263993	-0.321295	0.178016	0.272106	0.339809
356.827	10.1984	0.474877	0.0277466	-0.266259	0.0791482	0.909357	0.44828
355.818	10.2005	0.221585	-0.142545	-0.122232	0.349321	0.540402	0.70833
670.68	10.2168	0.265048	0.264521	-0.270878	0.25945	0.260323	0.405976
659.683	10.2168	0.11305	0.178732	-0.0628694	0.628882	0.449892	0.848298
660.191	10.2208	0.183098	0.247364	-0.143508	0.355453	0.221781	0.601577
627.678	10.2487	0.42539	0.380309	-0.0744727	0.125026	0.164144	0.837346
638.654	10.2522	0.448126	0.249914	-0.0702688	0.122375	0.363601	0.852886
267.014	10.2543	0.40436	0.0207324	-0.313958	0.0642885	0.915141	0.272812
170.944	10.2599	0.326204	0.050475	-0.220529	0.141769	0.807243	0.458314
616.672	10.2741	0.365391	0.346577	0.0254183	0.0810397	0.0949789	0.92421
617.686	10.2745	0.368307	0.307625	-0.0704527	0.135152	0.202595	0.8278
616.21	10.3607	0.228882	0.40657	0.0353633	0.166035	0.0267832	0.871903
146.055	10.4618	0.0421098	-0.245286	0.0701589	0.872045	0.361065	0.849556
145.051	10.4671	-0.135515	-0.294193	0.307463	0.415193	0.0991019	0.205353
519.72	10.5967	-0.0404852	0.363837	-0.0849221	0.84449	0.106101	0.771433
118.062	10.5978	0.874753	0.0538642	-0.131434	0.00204849	0.789523	0.646625
241.923	10.6066	0.513548	0.0762227	0.00658477	0.0543053	0.746668	0.984202
117.057	10.6094	0.78008	0.0910366	0.0703504	8.17759e-05	0.417418	0.652817
185.029	10.6148	0.633333	-0.00949329	-0.147824	0.00347225	0.952587	0.518413
391.545	10.6698	0.765583	-0.0749443	-0.684764	0.149934	0.879978	0.343326
246.994	10.7802	-0.0888577	0.0368456	-0.249035	0.574485	0.814347	0.27953
149.025	10.7924	-0.21171	-0.547149	0.258087	0.487136	0.0965319	0.547578
401.109	10.8039	0.315171	0.1734	-0.330755	0.159529	0.41833	0.283024
352.188	10.87	0.206248	-0.609569	-0.0467679	0.627513	0.174288	0.937516
252.99	10.8948	0.072779	-0.0604069	-0.253801	0.726127	0.770975	0.397062
388.166	10.8981	0.268657	-0.0383538	0.277512	0.406031	0.903449	0.539695
288.019	10.9028	-0.0282188	-0.363366	0.233554	0.928625	0.268065	0.603265
287.017	10.9138	-0.240751	-0.352913	0.366084	0.507222	0.338657	0.476785
217.024	10.9325	0.0258104	-0.00148608	-0.110721	0.814769	0.989218	0.483632
231.005	10.9349	-0.167801	-0.0402391	-0.173669	0.420581	0.843763	0.551692
230.284	10.9435	0.201322	-0.0258373	-0.583965	0.498158	0.929685	0.183683
647.226	10.9631	0.218983	0.397853	-0.415382	0.20287	0.0358159	0.099881
837.321	10.965	0.157272	0.426906	-0.480557	0.375927	0.0344494	0.0773799
445.142	10.9716	0.0846861	0.293451	-0.226001	0.520083	0.048082	0.239964
859.305	10.9716	0.152538	0.292483	-0.276414	0.228973	0.0370832	0.133667
468.128	10.9716	0.321876	-0.0691444	-0.0346232	0.0346	0.599906	0.851502
655.224	10.9731	0.12537	0.138309	-0.15743	0.205427	0.166866	0.255837
611.257	10.9745	-0.0507336	0.432893	-0.400711	0.862547	0.16563	0.347258
649.216	10.9763	0.209128	0.322795	-0.427946	0.0859423	0.0165091	0.0220493
385.134	10.9763	-0.182293	-0.120502	-0.031598	0.190068	0.371592	0.865047
815.347	10.9777	0.247864	0.625497	-0.855951	0.279974	0.0191686	0.022167
873.302	10.9777	0.161975	0.440755	-0.267253	0.270666	0.0122418	0.204765
408.173	10.9808	-0.14474	0.280048	-0.138604	0.596163	0.316842	0.718381
443.15	10.9808	-0.010293	0.325191	-0.141066	0.96025	0.142902	0.631662
700.154	10.9828	0.0368354	0.112895	-0.110584	0.770529	0.382093	0.539704
444.151	10.9859	0.235218	0.327069	-0.359443	0.048863	0.012112	0.0365033
407.171	10.9859	-0.259215	0.283606	-0.00633741	0.490524	0.451995	0.990339
262.037	10.987	0.206439	0.070933	-0.114357	0.0710957	0.495087	0.438761
261.036	10.987	0.0552279	0.0608226	0.0543146	0.51856	0.478362	0.651195
238.312	10.9873	0.21086	0.340178	-0.379645	0.0407453	0.00434558	0.0146044
465.132	10.9911	0.235185	0.189961	-0.186557	0.04439	0.0905337	0.21824
430.154	10.9911	0.0118313	0.114144	-0.0289615	0.927673	0.392545	0.875218
241.058	10.9911	0.031083	0.21448	-0.130352	0.821701	0.146735	0.509364
240.061	10.9911	0.174332	0.210999	-0.287954	0.0484936	0.0226766	0.0264022
116.052	10.9911	0.180126	0.189885	-0.355922	0.0223957	0.0177145	0.00427123
429.152	10.9916	-0.11596	0.142826	0.0617498	0.596271	0.516038	0.840645
239.06	10.9916	-0.0881103	0.223414	0.00641189	0.684929	0.31704	0.983252
300.997	10.9921	-0.552945	-0.269295	0.355292	0.196513	0.51199	0.539971
383.14	10.9939	0.022046	0.131981	-0.062455	0.771856	0.11027	0.564559
142.065	10.9939	0.23425	0.222659	-0.509018	0.00831262	0.0107246	0.000687515
552.097	10.9966	0.16758	-0.0231815	-0.196767	0.20116	0.852018	0.280877
669.213	10.9966	0.204072	0.256005	-0.296228	0.0739599	0.0327352	0.0679726
249.087	10.9987	0.0943051	0.105742	-0.209839	0.165464	0.125382	0.043084
487.118	10.999	0.176821	0.0527517	0.00421591	0.0809989	0.567959	0.973978
263.043	10.999	0.131632	0.0857786	-0.0393841	0.0504294	0.172218	0.639515
203.083	10.9999	-0.171544	0.0558362	0.144736	0.458138	0.806116	0.6543
264.034	11.0009	0.317317	0.10896	-0.375932	0.046257	0.441936	0.0838812
489.111	11.0056	0.247099	0.107169	-0.128753	0.0775186	0.405523	0.477067
634.242	11.0084	0.135673	0.256158	-0.264977	0.278411	0.0594119	0.146967
488.116	11.0084	0.247169	0.061923	-0.0849822	0.100419	0.654197	0.663667
701.164	11.0093	0.177917	0.0413684	-0.149325	0.156544	0.725609	0.380584
204.085	11.0094	-0.0130132	0.0741705	-0.0691475	0.918534	0.564077	0.702027
467.129	11.0103	0.0906683	-0.0510513	0.0374538	0.633482	0.787271	0.888472
491.11	11.0174	0.0144378	0.259061	-0.24189	0.9276	0.130978	0.298907
205.088	11.018	0.162057	0.062991	-0.252787	0.0331966	0.34731	0.0220413
202.449	11.018	0.104761	-0.00550224	-0.249253	0.119671	0.929348	0.0189747
238.996	11.0181	-0.0877543	-0.231945	0.0841092	0.713194	0.343528	0.80281
181.043	11.0258	-0.389659	-0.329565	0.242181	0.0804964	0.129166	0.405013
188.988	11.0258	-0.308099	-0.351419	0.152252	0.470716	0.412993	0.798051
188.4	11.0264	-0.0348367	-0.451898	-0.106472	0.944327	0.377298	0.880111
109.031	11.0347	0.163877	-0.198128	-0.321427	0.58493	0.510903	0.452724
319.001	11.0353	0.21725	0.0709627	-0.172407	0.103556	0.565132	0.332829
232.001	11.0375	-0.0822968	-0.111979	-0.287799	0.730959	0.640973	0.404203
272.073	11.0379	0.275185	-0.055399	-0.139969	0.0661022	0.679804	0.466241
633.244	11.0428	-0.149497	0.170371	-0.0344918	0.424096	0.365225	0.894101
271.071	11.0495	0.0971093	-0.0200806	-0.010448	0.302954	0.825629	0.93531
348.001	11.061	0.128626	-0.100228	-0.0976105	0.276052	0.388963	0.54795
147.024	11.0803	-0.614258	0.171204	-0.0308171	0.0825149	0.59536	0.945612
412.131	11.0807	0.359522	0.0469798	-0.273453	0.0957043	0.811335	0.339604
259.128	11.0828	0.00637544	0.117116	0.228259	0.9629	0.403715	0.259024
329.008	11.0837	0.294349	-0.00354108	-0.160045	0.0443219	0.97783	0.386306
156.066	11.0848	-0.225699	-0.540269	0.164096	0.477743	0.112488	0.71179
411.127	11.0935	0.250523	0.108565	-0.190856	0.179991	0.542135	0.451528
435.027	11.1004	0.214602	-0.138693	-0.36243	0.193809	0.386083	0.128727
614.309	11.1098	0.0469801	0.21057	-0.523537	0.891318	0.544897	0.29866
260.131	11.1236	0.227264	0.112553	0.0690957	0.104541	0.391102	0.704195
743.841	11.1484	-0.0239782	0.215242	-0.403491	0.822858	0.0714877	0.024956
283.043	11.1935	0.292494	-0.00697451	-0.390673	0.261543	0.977726	0.286912
600.275	11.2061	0.538477	0.104701	-0.746862	0.0499406	0.665672	0.0535249
286.006	11.2297	-0.106446	-0.23386	-0.224936	0.592579	0.255654	0.42917
222.076	11.2312	-0.0441973	-0.0106049	-0.437134	0.847786	0.963224	0.202988
842.292	11.2409	0.358779	0.153013	-0.710974	0.183787	0.552203	0.0758337
225.044	11.2417	0.648586	0.0716434	-0.96754	0.135954	0.859262	0.118473
371.099	11.2706	5.11309e-05	-0.239998	0.105233	0.99977	0.199697	0.67617
845.349	11.2901	-0.130217	0.253445	0.56332	0.515015	0.221541	0.0707239
158.082	11.3611	-0.568034	-0.795958	0.712753	0.0757014	0.0212091	0.107924
571.038	11.3729	0.214021	-0.0125882	-0.384692	0.277537	0.947046	0.176922
643.222	11.3942	-0.0647605	-0.0100466	-0.113462	0.497013	0.914832	0.403797
689.707	11.3987	-0.0806337	0.0377372	-0.138354	0.674572	0.843515	0.611412
660.73	11.4125	-0.699648	0.0704746	0.37778	0.16713	0.882146	0.577787
676.707	11.414	-0.333681	-0.173848	0.0131052	0.199917	0.487435	0.970001
643.745	11.4181	-0.44122	-0.0518076	0.133241	0.157421	0.859234	0.747638
649.742	11.4245	-0.276804	0.0818812	-0.0870044	0.235119	0.71399	0.782625
661.731	11.4248	-0.391765	0.0967351	0.0358466	0.253325	0.768935	0.938481
672.719	11.4251	-0.331458	0.00732209	0.0370862	0.152203	0.97297	0.903455
632.252	11.4293	-0.4748	-0.0285577	0.217929	0.167865	0.929566	0.635808
642.743	11.4293	-0.762483	-0.0371086	0.447255	0.160759	0.941881	0.539375
650.738	11.4327	-0.289423	0.10969	-0.149465	0.210379	0.61974	0.632374
631.752	11.4401	-1.24672	-0.0386512	0.953188	0.173353	0.964176	0.442414
632.754	11.4401	-0.814022	-0.053058	0.479153	0.161033	0.922286	0.538289
671.722	11.4401	-0.442866	0.0212148	0.163174	0.157992	0.942361	0.695561
799.857	11.4551	-0.540239	0.107781	0.48243	0.126444	0.742386	0.312843
680.737	11.4596	-0.329578	0.00568721	-0.014375	0.158399	0.979241	0.962909
182.048	11.4661	0.103349	-0.131107	-0.00623181	0.527484	0.426404	0.978222
245.103	11.4824	0.377035	-0.0539162	-0.383176	0.18358	0.840306	0.326104
789.365	11.4902	-0.430669	0.115933	0.31699	0.190772	0.710437	0.478209
434.126	11.4918	0.348369	-0.0592297	-0.167421	0.170872	0.804567	0.622979
788.87	11.5072	-0.717936	0.130006	0.566573	0.0955176	0.741065	0.322534
789.874	11.5108	-0.452581	0.10446	0.318827	0.160098	0.730034	0.462673
433.117	11.5165	0.21343	-0.0813958	-0.0517365	0.424164	0.756311	0.888795
138.056	11.5424	0.428057	0.0975474	-0.392701	0.193534	0.754631	0.384078
265.038	11.5425	0.269844	-0.0572583	-0.0855177	0.112539	0.715116	0.700034
978.414	11.549	-0.0754322	0.246265	0.117338	0.761614	0.335421	0.73878
977.922	11.5585	-0.649827	0.232229	0.880609	0.236027	0.659242	0.254476
738.843	11.561	-0.463565	-0.0385461	0.791964	0.251756	0.920714	0.173962
977.909	11.5677	-0.610802	-0.133116	1.18461	0.287181	0.810012	0.156523
978.897	11.5697	-0.420336	0.270844	0.655459	0.346265	0.537095	0.30192
979.876	11.5716	-0.370593	0.295666	0.430239	0.305237	0.407641	0.394809
266.04	11.5716	0.343309	-0.0836028	-0.251457	0.106457	0.669568	0.373781
927.386	11.5855	-0.277979	0.127842	0.746637	0.528718	0.769739	0.246408
927.887	11.5881	-0.205528	0.0991323	0.5909	0.522082	0.755067	0.210648
405.14	11.6041	0.743267	-0.204819	-0.105133	0.0436749	0.528201	0.816883
956.88	11.609	-0.372413	0.369345	0.296985	0.278791	0.28248	0.530756
917.901	11.6132	-0.0103554	0.473636	0.132492	0.9691	0.104969	0.727037
943.875	11.6226	-0.175752	0.260596	0.492026	0.653216	0.508591	0.382652
937.878	11.6265	-0.38871	0.25478	0.577835	0.495055	0.651913	0.473954
928.897	11.6278	-0.447961	0.154244	0.70073	0.299994	0.712718	0.255154
924.871	11.6288	-0.316841	0.115231	0.689335	0.345112	0.724663	0.161303
923.361	11.6301	0.00969559	0.102083	0.249155	0.943036	0.459921	0.217141
929.891	11.6301	-0.179403	0.149606	0.228702	0.597738	0.659043	0.633757
923.867	11.6301	-0.380554	0.302206	0.506003	0.381459	0.483053	0.409249
679.749	11.6304	-0.407149	-0.114498	0.656294	0.372026	0.797022	0.31254
928.397	11.6317	0.00921157	0.21875	0.270752	0.948056	0.149087	0.19992
895.093	11.6317	0.161753	0.208256	0.088721	0.203698	0.112592	0.605984
924.365	11.6317	-0.0410942	0.0181213	0.386533	0.779803	0.90168	0.0906542
960.378	11.6317	-0.166776	0.168588	0.108845	0.319396	0.314497	0.637336
944.875	11.6353	-0.450757	0.197327	0.633736	0.307274	0.645878	0.309929
954.876	11.641	-0.0801228	0.144046	0.380047	0.729789	0.538114	0.264509
984.908	11.641	-1.61062	-0.127962	0.395645	0.0835996	0.879158	0.740305
894.08	11.6464	0.0873867	0.269744	0.24018	0.569483	0.104502	0.282307
995.395	11.647	-0.798376	-0.136983	-0.0153965	0.089937	0.749238	0.979665
946.894	11.647	-0.344434	0.28264	0.562142	0.395409	0.482238	0.330353
919.887	11.647	-0.495337	0.117495	0.786839	0.282542	0.791559	0.231743
945.889	11.647	-0.560118	0.28148	0.835688	0.278523	0.575175	0.254896
917.396	11.6504	-0.269228	0.161047	0.627381	0.393613	0.604356	0.175691
916.896	11.6504	-0.619362	0.234392	0.95155	0.299279	0.685511	0.262356
918.886	11.6504	-0.503255	0.0856039	0.826828	0.316533	0.860316	0.249705
934.872	11.6521	-0.471693	0.21124	0.614512	0.300252	0.633241	0.337465
946.39	11.6521	-0.148569	0.269545	0.40816	0.51523	0.251828	0.22256
994.9	11.6538	-1.55769	-0.189166	0.674531	0.0454872	0.78111	0.489313
983.906	11.6539	-1.68286	-0.137426	0.414924	0.0932292	0.880221	0.748314
984.407	11.6539	-1.31147	-0.109335	0.0486137	0.0943467	0.878234	0.961555
894.567	11.6547	-0.510577	0.20245	0.867217	0.318125	0.684044	0.236872
915.895	11.6547	-0.934441	0.219846	1.33333	0.253854	0.779753	0.249973
916.395	11.6547	-0.594348	0.246398	0.963339	0.299576	0.657874	0.239356
996.385	11.6555	-0.292662	0.00568131	0.0776322	0.248704	0.981325	0.821357
896.908	11.6555	-1.27416	0.200092	1.67857	0.226453	0.842109	0.256984
897.409	11.6555	-0.993712	0.227767	1.36342	0.234797	0.775875	0.24783
897.91	11.6555	-1.25935	0.205902	1.6333	0.232638	0.838061	0.270293
914.894	11.6555	-0.970154	0.255203	1.34434	0.262732	0.759423	0.27173
915.396	11.6555	-0.531654	0.254578	0.906299	0.303133	0.612521	0.22129
907.898	11.6555	-1.07176	0.135804	1.44119	0.245988	0.877898	0.268049
908.399	11.6555	-0.508605	0.132682	0.894843	0.303282	0.781413	0.208309
908.9	11.6555	-0.859755	0.142376	1.19799	0.268735	0.848885	0.275307
985.4	11.6555	-1.05613	-0.14334	0.540387	0.0472793	0.758744	0.421457
919.387	11.6561	-0.0651709	0.0971604	0.445929	0.697351	0.564389	0.0868717
898.394	11.6584	-0.693103	0.181991	1.18058	0.256527	0.756554	0.179317
995.901	11.6588	-1.03275	-0.105915	0.794034	0.0542939	0.823052	0.255422
932.893	11.6683	-0.123321	0.281073	0.456428	0.618959	0.272284	0.212817
172.454	11.6799	-0.290116	-0.221415	-0.586531	0.600348	0.68817	0.458016
909.365	11.6875	-0.208914	0.10961	0.726834	0.473342	0.703323	0.101309
293.103	11.6907	-0.022969	-0.0209976	0.189121	0.739115	0.760652	0.0795693
174.987	11.6923	-0.456437	-0.28988	-0.295746	0.322586	0.522017	0.642037
173.995	11.6935	-0.511119	-0.31692	-0.416118	0.346976	0.552798	0.580972
898.864	11.6954	-0.897088	0.1218	1.47082	0.248837	0.870104	0.187336
172.992	11.699	-0.684202	-0.333081	-0.28677	0.210665	0.526289	0.697286
93.034	11.7073	-0.174544	-0.200177	-0.297698	0.707464	0.667377	0.651533
910.814	11.7139	-0.285911	0.0502996	0.81763	0.346497	0.864694	0.0777486
975.818	11.7186	-0.0172853	0.141324	-0.443094	0.95416	0.640734	0.3137
913.49	11.7186	-0.126246	0.145562	0.379117	0.570057	0.513995	0.24402
906.801	11.7212	-0.228961	0.273411	0.459765	0.510712	0.434916	0.35702
974.815	11.7257	-0.604127	-0.0946827	0.338134	0.105949	0.782488	0.491413
912.489	11.73	-0.183235	0.20388	0.436305	0.530418	0.486459	0.301688
899.336	11.7339	-0.229873	0.0987178	0.856345	0.481733	0.759482	0.0878817
974.309	11.7339	-0.7639	-0.0565052	0.400486	0.052125	0.870295	0.422673
252.083	11.7361	-0.00613418	0.0786495	-0.290772	0.977737	0.721604	0.362803
975.313	11.7415	-0.597987	-0.0213809	0.278981	0.0847536	0.945661	0.534615
910.31	11.7525	0.0885156	0.0931333	0.45813	0.633665	0.616343	0.107412
889.311	11.7548	-0.163599	0.113879	0.828759	0.615382	0.725428	0.0980822
482.178	11.7588	0.514166	0.447201	-0.557123	0.126625	0.176418	0.227786
591.539	11.761	-0.0972879	-0.0743474	0.67637	0.773583	0.825791	0.181604
913.767	11.7625	-0.205147	-0.0104078	0.790176	0.504983	0.972621	0.0938308
847.883	11.7635	-0.682888	0.231953	0.57953	0.128347	0.580429	0.338616
884.494	11.7642	0.129544	0.0432074	0.601513	0.60808	0.863152	0.117842
888.811	11.7642	-0.90319	0.0767126	1.57972	0.265592	0.921526	0.177055
887.31	11.7673	-0.805471	0.0789785	1.53293	0.270204	0.910401	0.149594
887.811	11.7673	-1.12269	0.0896796	1.84484	0.241807	0.92206	0.180101
888.311	11.7673	-0.601055	0.0954823	1.28809	0.29824	0.864115	0.130318
885.005	11.7691	0.118557	-0.0631809	0.503781	0.592751	0.774147	0.132732
914.274	11.7739	0.0168964	0.0178284	0.510714	0.939694	0.936376	0.133774
889.811	11.7804	-0.42352	0.117278	1.09304	0.402405	0.81275	0.145298
847.381	11.7888	-0.223382	0.165915	0.277501	0.186588	0.314602	0.240146
846.379	11.7953	-0.544222	0.211935	0.390461	0.148213	0.550517	0.440367
865.869	11.7953	-0.466622	0.257811	0.327778	0.138743	0.390179	0.437733
864.366	11.8034	-0.0373354	0.254222	-0.0868907	0.815883	0.139933	0.702445
857.874	11.8077	-0.592274	0.12337	0.456775	0.155499	0.75233	0.41735
543.038	11.8127	0.231745	-0.00830344	-0.141866	0.457007	0.978347	0.743854
851.79	11.8131	-0.733511	-0.14674	1.10612	0.159973	0.764571	0.137197
864.875	11.8131	-0.442234	0.165433	0.437007	0.0910745	0.492982	0.216497
865.372	11.8147	-0.0178074	0.167688	0.0729759	0.91038	0.305814	0.745051
857.371	11.8147	-0.1655	0.171697	-0.0207075	0.412425	0.395914	0.940903
846.884	11.8154	-1.17828	0.142784	1.09138	0.133682	0.844777	0.30618
794.781	11.8167	-0.588372	-0.121836	1.10006	0.175921	0.766358	0.0852795
852.794	11.8197	-0.347885	-0.16517	0.807189	0.311798	0.622102	0.114468
794.273	11.8359	-0.010851	-0.109615	0.474896	0.961252	0.626272	0.159459
747.757	11.8359	-0.154779	-0.177536	0.929512	0.65664	0.610832	0.0856196
852.294	11.8423	-0.179283	-0.145859	0.467722	0.429166	0.517218	0.163059
862.781	11.8456	-0.201921	-0.0953969	0.363685	0.399143	0.68501	0.289535
736.762	11.8559	-0.878723	-0.249263	1.65468	0.193528	0.697745	0.0954162
737.764	11.8564	-0.238596	-0.244134	1.07128	0.536311	0.527134	0.0743645
206.045	11.8564	-0.0550846	-0.190103	-0.192498	0.812299	0.421599	0.561008
737.261	11.8646	0.0383399	-0.121283	0.493707	0.879935	0.635033	0.193378
234.083	11.8728	0.284902	0.362266	-0.50714	0.31864	0.2133	0.217525
305.033	11.8753	0.10376	-0.160261	-0.390719	0.645892	0.482024	0.239439
879.81	11.9074	0.0183694	0.355445	0.670745	0.933295	0.133219	0.0562955
341.088	11.9113	-0.115298	-0.516475	0.115707	0.517458	0.0162368	0.643763
295.046	11.9155	0.524043	-0.00069167	-0.309323	0.122132	0.998235	0.491147
129.056	11.9173	0.126943	0.177431	-0.203787	0.545689	0.40357	0.494244
879.305	11.9174	0.141367	0.218755	0.473704	0.597362	0.419501	0.228798
130.063	11.9246	0.642044	0.240001	-0.787588	0.126043	0.541045	0.176777
197.044	11.926	0.375488	0.156233	-0.342456	0.204584	0.581314	0.399083
442.261	11.9306	-0.236937	-0.0673792	-0.02312	0.0785999	0.582277	0.892833
878.806	11.9306	-0.290644	0.118503	0.994593	0.446354	0.752407	0.0886439
878.306	11.9415	-0.0805859	0.276387	0.66354	0.7822	0.355492	0.134533
137.025	11.9597	0.0649095	-0.0500448	-0.0776127	0.652289	0.727588	0.702693
476.205	11.97	0.0450412	-0.0858477	0.167621	0.597267	0.325053	0.185754
440.244	11.9728	-0.328786	-0.201287	0.529936	0.229485	0.448746	0.17643
441.253	11.9837	-0.418986	-0.222954	0.51651	0.204294	0.483056	0.262712
170.082	11.9837	0.493472	0.650922	-0.599276	0.143372	0.06477	0.201053
172.065	11.9992	0.430671	0.21239	-0.166697	0.0409909	0.264464	0.524158
541.028	12.03	0.243222	-0.108871	-0.350716	0.22432	0.571793	0.216186
251.06	12.0512	0.28109	0.0530323	-0.42671	0.161933	0.778677	0.136739
323.081	12.0949	0.253027	0.193807	-0.380275	0.277916	0.398599	0.251122
565.68	12.107	-0.021502	-0.363655	0.354982	0.963119	0.44307	0.592808
303.016	12.1263	-0.03848	0.0631049	-0.43126	0.873647	0.794531	0.229396
704.318	12.1342	0.26803	0.694525	-0.601351	0.480627	0.0915797	0.274349
151.04	12.1485	-0.228461	-0.101808	-0.263004	0.155804	0.504843	0.237962
785.227	12.1557	0.475147	0.272242	-0.101932	0.0190035	0.131732	0.668506
218.042	12.1704	-0.173686	-0.268486	-0.0488307	0.538344	0.349504	0.901473
275.03	12.1934	-0.427927	-0.396883	0.0655767	0.225717	0.258145	0.890413
336.074	12.1934	0.643643	-0.179659	-0.822718	0.368693	0.797046	0.414308
276.029	12.1945	-0.303257	-0.427575	0.0128563	0.335759	0.186759	0.976261
277.027	12.1955	-0.126772	-0.281761	-0.111345	0.529721	0.182447	0.694019
785.736	12.2142	0.426798	-0.0149777	0.124105	0.194263	0.961562	0.778211
297.005	12.2178	-0.158534	-0.38347	-0.190491	0.682743	0.3351	0.727991
784.731	12.2184	0.429094	0.182805	0.0361664	0.148343	0.5148	0.926392
159.067	12.2229	-0.0692177	-0.249095	0.0636307	0.553112	0.0564984	0.697936
160.063	12.225	0.0982385	-0.250097	-0.0956553	0.597094	0.198752	0.714595
623.126	12.2332	0.0466087	-0.153308	-0.196133	0.887719	0.644464	0.675958
624.126	12.2353	-0.122079	0.0405548	-0.319891	0.68785	0.893321	0.462248
308.08	12.2564	0.0224239	-0.0583137	0.167248	0.856424	0.64005	0.353254
952.484	12.2567	-0.126449	0.237879	0.340896	0.606345	0.34257	0.336543
623.694	12.2722	0.441765	-0.289799	0.179972	0.233133	0.422054	0.71986
951.467	12.2761	0.0155149	0.293161	0.226024	0.923721	0.0988573	0.338539
579.036	12.2791	-0.0804859	-0.269356	-0.196226	0.800182	0.4067	0.663884
531.02	12.2805	0.400045	0.202134	-0.590172	0.345645	0.62628	0.326418
247.024	12.2807	-0.513434	-0.451391	0.0868989	0.12999	0.176214	0.844993
950.468	12.2827	-0.249244	0.265999	0.489348	0.471705	0.443486	0.325004
580.009	12.2916	0.057441	-0.209397	-0.214161	0.877185	0.576819	0.685085
510.05	12.3092	0.273636	0.19509	-0.65581	0.435043	0.574131	0.201238
509.043	12.3133	0.252177	0.235585	-0.556538	0.491684	0.519808	0.293409
559.042	12.3355	-0.0578275	-0.282638	-0.163768	0.848757	0.363867	0.703552
254.519	12.3365	0.591967	0.383899	-0.988051	0.210402	0.402951	0.146697
254.019	12.3387	0.429919	0.280063	-0.73285	0.263035	0.455478	0.184798
558.035	12.3427	-0.116851	-0.264313	-0.160526	0.696539	0.387109	0.704727
557.024	12.3569	-0.246453	-0.292212	0.0243642	0.332743	0.256378	0.94432
179.055	12.3695	-0.00351213	-0.186236	-0.0474862	0.96691	0.0529274	0.693133
646.815	12.3719	-0.12259	-0.183542	-0.0767718	0.362346	0.186118	0.680108
621.115	12.3827	0.0107687	0.0182466	-0.186133	0.969902	0.949029	0.646958
364.118	12.4041	0.409101	0.0676537	-0.361822	0.195132	0.82101	0.402391
165.013	12.4139	-0.0875959	-0.390819	0.160349	0.605012	0.04306	0.505675
178.051	12.4158	-0.325534	-0.411636	0.145428	0.15519	0.0824693	0.63339
775.243	12.4184	0.279077	-0.00141886	0.0361995	0.180944	0.994238	0.896393
363.12	12.4284	0.314709	0.132681	-0.277227	0.31494	0.66327	0.523048
774.241	12.4316	0.157557	-0.0113079	0.211702	0.448841	0.955827	0.471
223.063	12.4316	0.324116	0.0526234	-0.607668	0.203612	0.827787	0.103778
774.741	12.4328	0.214115	-0.00370606	0.137127	0.344102	0.986541	0.660968
266.996	12.4449	-0.482125	-0.498381	-0.00119891	0.138428	0.127309	0.997762
259.017	12.4449	-0.31594	0.0334739	-0.237819	0.172415	0.877798	0.448164
773.739	12.4454	0.142491	0.0111331	0.237067	0.511396	0.958498	0.442224
134.059	12.4485	0.10094	-0.0677874	-0.334844	0.597192	0.721339	0.232881
847.207	12.4531	0.361521	0.0750453	-0.154968	0.195398	0.776768	0.679768
921.303	12.457	0.603871	0.209991	-0.366927	0.0090719	0.268275	0.179778
511.058	12.4604	0.601946	0.0966146	-0.920304	0.238481	0.843103	0.205775
991.333	12.4608	0.591571	0.281968	-0.334894	0.119727	0.430508	0.505418
609.139	12.4666	0.180126	-0.167359	-0.624295	0.730723	0.749013	0.407811
612.686	12.4728	0.459716	-0.432058	-0.216007	0.506386	0.531617	0.823032
775.742	12.4739	0.281202	-0.0221555	0.0898355	0.404811	0.94646	0.847483
992.346	12.474	0.620452	0.233294	-0.413339	0.0940742	0.495448	0.397075
246.02	12.4821	-0.666866	-0.49028	0.106049	0.025783	0.0794929	0.766564
601.196	12.4882	0.00939721	-0.216218	0.12583	0.98376	0.641922	0.847358
224.002	12.4883	0.011383	-0.0408849	-0.401627	0.953046	0.832729	0.168057
921.811	12.4883	0.709273	0.13488	-0.628299	0.00408734	0.471318	0.037512
991.846	12.4891	0.6235	0.296717	-0.344607	0.0665115	0.341918	0.430763
836.219	12.4891	0.323845	-0.0723167	-0.00952987	0.133718	0.719092	0.973151
932.271	12.4892	-0.540541	-0.252388	0.0664747	0.149304	0.477649	0.893094
932.775	12.4893	-0.556961	-0.263076	0.0854235	0.127784	0.445493	0.858411
858.246	12.4983	0.230433	-0.00244564	-0.0617119	0.269705	0.990266	0.827948
601.7	12.4993	0.0592288	-0.312689	0.163873	0.912301	0.565046	0.829587
807.201	12.501	0.443599	0.118906	-0.014866	0.0354242	0.517296	0.95372
539.169	12.5018	0.332165	0.0885549	0.113443	0.145921	0.678963	0.70745
933.777	12.5077	-0.357258	-0.167019	-0.188072	0.2162	0.547669	0.630648
602.196	12.5082	0.0965948	-0.161519	-0.192305	0.802733	0.677267	0.725614
602.7	12.5113	0.204358	-0.339491	0.0300763	0.707224	0.535936	0.968678
807.703	12.5118	0.385193	0.117655	-0.0187314	0.171698	0.658769	0.960097
821.25	12.5143	0.42115	0.0341355	-0.00887778	0.0744814	0.87214	0.976369
207.034	12.5143	0.453568	0.0762868	-0.594358	0.0616231	0.724343	0.0789596
540.498	12.5143	0.516587	-0.0602352	-0.179154	0.100633	0.834131	0.6612
832.251	12.5143	0.451978	0.0664052	-0.168729	0.0517933	0.745888	0.563361
809.259	12.5143	0.121243	0.135923	0.386734	0.649993	0.611565	0.318783
809.76	12.5143	0.136413	0.130949	0.409949	0.59909	0.613552	0.27832
810.261	12.5143	0.183008	0.143141	0.295357	0.44138	0.544073	0.382342
810.761	12.5143	0.239916	0.139994	0.218466	0.274202	0.512712	0.471408
806.7	12.5143	0.474088	0.156719	-0.0134369	0.0496196	0.466849	0.964196
835.714	12.5144	0.387371	0.0336203	-0.0628074	0.12676	0.88608	0.84997
539.504	12.5147	0.385055	0.064672	0.118285	0.196418	0.818841	0.76733
539.838	12.5147	0.51101	0.128907	0.0366537	0.102191	0.653964	0.927729
811.262	12.5157	0.321326	0.131027	0.147806	0.134223	0.516026	0.602605
245.012	12.5158	-1.02709	-0.510911	0.368991	0.00939322	0.129476	0.413199
821.751	12.5234	0.430124	-0.0421635	0.011741	0.11515	0.86676	0.973623
811.762	12.5364	0.430933	0.162292	0.0223306	0.0644737	0.442956	0.93934
828.248	12.5389	0.312171	0.0836646	-0.155568	0.0572841	0.568495	0.456798
858.758	12.5417	0.341509	0.092068	-0.17685	0.107448	0.638178	0.525507
822.247	12.5436	0.430079	0.0728147	-0.0416612	0.0273777	0.660579	0.858253
917.774	12.5437	-0.522473	-0.178712	-0.312941	0.00745539	0.258655	0.170582
917.267	12.552	-0.713575	-0.194584	-0.532375	0.00565059	0.336824	0.0834884
942.719	12.5553	-0.359046	-0.319234	-0.777359	0.235842	0.287428	0.085366
831.764	12.5554	0.390557	-0.0593183	0.0410321	0.135464	0.807285	0.904887
880.743	12.5578	-0.409879	-0.311807	-0.317299	0.236511	0.358812	0.503475
916.768	12.5584	-0.840613	-0.25302	-0.983928	0.0219914	0.418348	0.0469628
812.258	12.561	0.425719	0.121856	0.00607167	0.0459664	0.518413	0.981596
946.274	12.5636	0.181242	0.0571788	-0.498989	0.418428	0.794642	0.135345
916.267	12.5638	-0.861932	-0.22017	-0.894232	0.0145741	0.4507	0.0522984
813.725	12.5681	0.42818	0.153569	-0.17873	0.0795688	0.491993	0.569833
915.764	12.5683	-0.873099	-0.238769	-1.01544	0.0206166	0.454133	0.0455489
809.631	12.5684	0.309264	-0.0184275	-0.011387	0.315857	0.950731	0.978459
455.11	12.5692	0.242489	0.281359	-0.354209	0.285198	0.220544	0.270792
880.247	12.5739	-0.502981	-0.400677	-0.456695	0.115601	0.197403	0.290004
871.723	12.5739	-0.300337	-0.487762	0.1277	0.4752	0.258392	0.827437
463.088	12.5796	-0.0251301	0.0358042	-0.256838	0.88244	0.833252	0.301968
881.758	12.58	-0.00878965	-0.237415	-0.345302	0.976056	0.42721	0.414727
500.134	12.583	-0.073523	-0.211025	-0.435964	0.774474	0.419656	0.249143
812.76	12.5981	0.368286	0.102995	0.0204644	0.164826	0.680248	0.953573
822.742	12.6027	-0.0354244	-0.278146	0.140372	0.892319	0.30447	0.705614
831.281	12.6189	0.239496	-0.0799552	0.126409	0.157936	0.617134	0.577019
242.998	12.622	-0.550702	-0.0193966	-0.0928588	0.0234795	0.924078	0.747755
273.044	12.6251	-0.132424	-0.077226	-0.327821	0.556121	0.729458	0.31364
810.896	12.6255	0.315727	0.278156	-0.0370457	0.16395	0.213939	0.901964
979.862	12.6255	0.476915	0.00619581	-0.272285	0.0365619	0.974819	0.341185
711.313	12.6299	-0.125078	-0.0288121	0.115633	0.608535	0.905316	0.736522
717.73	12.6311	0.24399	-0.361633	0.169093	0.61784	0.463892	0.80567
211.342	12.6312	-0.526223	-0.220002	-0.612205	0.0848787	0.434942	0.144487
820.814	12.6342	-0.0628229	0.159474	0.435982	0.865871	0.669672	0.41695
717.229	12.6386	0.162905	-0.185353	-0.0260148	0.592606	0.543761	0.951371
128.656	12.6405	0.507279	0.502103	-0.499813	0.157431	0.161198	0.308823
716.225	12.6431	0.0908796	-0.237453	0.176454	0.806035	0.525852	0.736472
710.819	12.6462	-1.05673	-0.0553989	1.04802	0.206699	0.944344	0.363477
711.822	12.6462	-0.529946	0.0524345	0.512383	0.263921	0.908302	0.435199
940.341	12.6471	0.310255	-0.00831651	-0.110879	0.0706808	0.956823	0.612739
213.007	12.6471	-0.788085	-0.302993	-0.340846	0.00288953	0.142815	0.232228
214.001	12.6471	-0.749473	-0.29597	-0.314584	0.00492186	0.167527	0.286954
716.727	12.6476	0.180385	-0.25635	0.119821	0.6446	0.515067	0.82755
899.88	12.6495	0.0155631	0.136302	0.298084	0.961971	0.677959	0.523999
83.8491	12.6513	0.382052	0.346671	-0.154857	0.155039	0.192072	0.664653
993.872	12.6528	0.387603	0.0683831	-0.221416	0.0334015	0.662942	0.330517
907.758	12.661	-0.0735041	0.156995	-0.514088	0.810258	0.61047	0.254596
765.22	12.6642	-0.171774	-0.352605	0.0144255	0.631976	0.336698	0.977139
986.868	12.6655	0.314688	0.148173	-0.25652	0.190294	0.519414	0.433354
212.002	12.6655	-1.00444	-0.31339	-0.142972	0.000851775	0.145305	0.616816
997.37	12.6717	0.358383	0.0860358	-0.215911	0.0390194	0.570364	0.324375
953.349	12.672	0.255869	-0.0812649	-0.195542	0.0296728	0.425959	0.191394
660.27	12.6734	0.238449	-0.090408	0.0339713	0.265119	0.661679	0.906898
907.263	12.6744	-0.0825476	0.0372045	-0.553531	0.708869	0.865877	0.103863
63.3482	12.675	0.57138	0.372606	-0.323381	0.0615268	0.194208	0.409829
765.723	12.6819	-0.325445	-0.468484	0.241669	0.443468	0.279324	0.683236
244.005	12.6847	-0.0254436	-0.0326993	-0.454299	0.928592	0.908324	0.276593
890.81	12.6867	0.313353	0.204732	-0.0128835	0.0525619	0.175655	0.948912
545.568	12.6898	0.520028	0.0183702	0.285434	0.16086	0.957806	0.565268
660.796	12.692	-0.264869	-0.152871	0.470085	0.489882	0.687172	0.39032
965.858	12.6967	0.32493	-0.0118332	-0.220041	0.0323592	0.927311	0.25086
998.371	12.6967	0.436149	0.153978	-0.265076	0.0351705	0.397552	0.308306
659.212	12.6988	0.121488	-0.311107	0.387831	0.735824	0.397071	0.453045
985.895	12.699	0.0272667	0.154282	-0.00142972	0.823416	0.22825	0.993388
658.711	12.6993	0.14118	-0.347711	0.465044	0.720269	0.387564	0.412671
659.713	12.6993	0.160008	-0.371172	0.401576	0.690396	0.366005	0.484437
941.865	12.7001	-0.155205	-0.168999	0.480888	0.530171	0.495285	0.188525
990.878	12.7003	0.3379	0.0466428	-0.175479	0.0571609	0.767067	0.438492
985.713	12.7011	-0.0137044	-0.173322	0.734531	0.963468	0.566603	0.111075
964.873	12.7023	0.228937	-0.187264	0.0315577	0.2502	0.34023	0.906798
982.869	12.7034	0.382089	0.14874	-0.329325	0.0253131	0.316692	0.133058
952.863	12.7035	0.0487037	-0.231512	0.0738233	0.759538	0.170569	0.742975
966.362	12.7052	0.261212	-0.0393832	-0.0900949	0.0342929	0.71089	0.551643
925.361	12.7058	-1.00072	0.0533149	0.419009	0.103317	0.924391	0.601096
925.863	12.7058	-1.11762	0.0484035	0.553565	0.105161	0.938884	0.540195
942.865	12.7089	-0.144178	-0.263134	0.374263	0.580659	0.324119	0.32152
989.877	12.7116	0.408361	0.074407	-0.156027	0.0153159	0.591051	0.430716
978.883	12.7136	0.2533	-0.0464757	0.125082	0.0998588	0.741626	0.534136
952.854	12.7192	0.0545536	-0.103382	-0.300143	0.766283	0.576075	0.265771
962.887	12.7192	0.358309	-0.129119	0.170229	0.05364	0.438789	0.469309
836.813	12.7217	0.089553	0.0071812	0.350058	0.631986	0.969133	0.206087
968.873	12.7229	0.335289	0.0935661	-0.336143	0.0882696	0.60289	0.206205
999.884	12.7275	0.450931	0.036143	-0.232458	0.0255562	0.831834	0.3476
926.364	12.728	-0.968575	0.0365658	0.344018	0.0849971	0.942686	0.634913
980.879	12.7287	0.35391	0.0428736	-0.172913	0.0279387	0.75379	0.38164
955.876	12.7287	-0.297945	-0.0328998	0.465894	0.162681	0.869386	0.12751
959.871	12.7287	0.261188	0.0239215	-0.147501	0.175072	0.894966	0.568802
947.842	12.7288	0.0181091	0.0440189	-0.0734967	0.903749	0.769328	0.729463
846.794	12.7294	0.107379	-0.208587	0.254104	0.624226	0.351391	0.41879
968.374	12.7294	0.31983	-0.083185	-0.0780543	0.0571394	0.579471	0.711564
847.8	12.7298	0.207532	0.0293983	0.0638122	0.175365	0.838447	0.754775
820.358	12.7301	-0.548869	0.195556	1.00997	0.413382	0.766394	0.294177
969.374	12.731	0.280812	0.047444	-0.205584	0.0515475	0.709341	0.270524
936.854	12.732	-0.623433	-0.123519	0.155893	0.0328913	0.623753	0.661044
958.86	12.7325	0.114017	-0.0243917	-0.0416347	0.43687	0.86538	0.83794
998.889	12.7346	0.353105	0.0737954	-0.160623	0.0519812	0.646305	0.484061
950.865	12.7346	0.306761	0.00083544	-0.112137	0.0686018	0.99557	0.601513
956.866	12.7346	0.0934063	0.142072	-0.156322	0.308631	0.13681	0.234234
818.857	12.7346	-1.06239	0.0756133	1.62809	0.296687	0.938625	0.260932
819.358	12.7346	-0.904111	0.0909054	1.45086	0.315227	0.916863	0.258724
819.859	12.7346	-0.91108	0.0908351	1.44736	0.313384	0.917225	0.261368
996.886	12.7346	0.270722	-0.124857	0.111488	0.125836	0.453318	0.632125
823.266	12.7367	0.0804285	-0.23001	0.179939	0.630605	0.190695	0.45185
816.265	12.7367	0.068944	0.0406924	0.448033	0.6717	0.801729	0.077928
942.361	12.7367	-0.167623	-0.0607228	0.358427	0.232849	0.652561	0.0867812
816.764	12.7367	0.0596298	0.103867	0.426902	0.787256	0.639909	0.195405
976.88	12.7401	0.363748	0.132885	-0.258715	0.0135237	0.282546	0.151386
963.381	12.7401	0.362945	0.111844	-0.217308	0.0189569	0.392733	0.249735
982.362	12.7432	0.276208	0.0115027	-0.152642	0.045817	0.924063	0.383007
939.87	12.7432	0.24341	0.0554137	0.0370796	0.104599	0.68788	0.84863
960.873	12.7438	0.323059	-0.0562853	-0.128573	0.0775518	0.733449	0.584555
967.366	12.7448	0.296796	0.119718	-0.122006	0.0677962	0.419302	0.556559
826.861	12.7463	0.1019	0.166766	0.475475	0.656769	0.471786	0.166383
937.862	12.7507	-0.165547	-0.112385	0.082944	0.435609	0.592683	0.778642
837.321	12.7522	0.105188	-0.00941005	0.287491	0.582235	0.960359	0.300126
988.887	12.7522	0.306222	-0.0213755	-0.040161	0.0222206	0.848437	0.799752
936.35	12.7534	-0.461297	-0.0988887	0.0335058	0.0375339	0.608027	0.901403
937.349	12.7537	-0.362867	-0.0614985	-0.0227869	0.0528517	0.710415	0.922176
817.281	12.7539	-0.0921967	-0.00844683	0.251229	0.477501	0.947247	0.188994
961.871	12.7562	0.334775	0.0251846	-0.144105	0.0289721	0.846601	0.442175
966.872	12.7569	0.256267	0.149578	-0.13116	0.0414072	0.194372	0.4054
976.364	12.7569	0.399346	0.219861	-0.41215	0.0252295	0.169085	0.0800578
867.842	12.7569	-0.288494	0.0373061	0.590309	0.471219	0.924509	0.30576
957.858	12.7591	0.177043	0.0970581	-0.150767	0.213839	0.480265	0.439649
838.304	12.7607	0.189664	0.0190858	0.331363	0.228298	0.898793	0.145689
967.884	12.762	0.618005	0.341701	-0.401822	0.0228169	0.15877	0.232344
868.342	12.7704	0.056557	0.0296925	0.316257	0.778221	0.882232	0.282634
969.885	12.7708	0.346324	0.136953	-0.236423	0.0144024	0.253419	0.171446
845.814	12.7745	-0.264402	-0.307641	0.730122	0.407197	0.338556	0.126004
837.833	12.7792	-0.206453	0.0411107	0.558844	0.448019	0.877713	0.165272
868.845	12.7814	-0.129576	0.0948711	0.474121	0.699397	0.776903	0.330606
864.794	12.7828	0.2262	-0.0369721	0.21672	0.393966	0.88658	0.558586
848.304	12.7828	0.220065	0.0376316	0.0390658	0.115462	0.770414	0.830159
850.847	12.7841	-0.0697701	-0.00775595	0.352303	0.786901	0.975969	0.347412
938.353	12.7845	0.134083	0.0981313	-0.141453	0.180193	0.313871	0.305236
949.874	12.7851	0.261033	0.0355343	-0.0177204	0.0614948	0.774872	0.919478
974.889	12.7859	-0.196768	0.0309759	0.190633	0.492879	0.912728	0.635776
848.821	12.7861	-0.0584762	0.0160777	0.292312	0.781436	0.939052	0.340124
973.882	12.7861	0.210948	-0.0397045	-0.134494	0.0881732	0.724296	0.406982
845.309	12.7877	-0.00856437	-0.12188	0.323297	0.959663	0.478958	0.201147
829.847	12.7893	-0.60369	-0.0544083	1.04649	0.29881	0.922699	0.210334
830.348	12.7893	-0.347958	-0.0461366	0.764604	0.381942	0.905395	0.188512
830.849	12.7993	-0.308967	-0.040613	0.710437	0.395694	0.909004	0.182644
846.312	12.8002	0.0031075	-0.140779	0.312763	0.985529	0.421235	0.219646
975.397	12.8117	0.114249	0.0897339	-0.0599847	0.377957	0.484443	0.7379
974.391	12.8121	0.0552799	-0.0372845	0.0235812	0.653991	0.761584	0.891808
332.129	12.8136	0.171981	0.0537086	-0.23452	0.255595	0.71212	0.271629
575.751	12.8137	-0.0165861	0.342727	-0.271275	0.94632	0.189061	0.444933
823.768	12.8145	0.0229606	-0.323404	0.300407	0.914603	0.157654	0.335852
863.811	12.8155	0.00181917	-0.0574115	0.343924	0.99167	0.742682	0.187882
840.838	12.8275	-0.338466	-0.0576795	0.723482	0.417171	0.887697	0.232091
841.843	12.8408	-0.336677	-0.061025	0.659884	0.258161	0.830891	0.130057
841.337	12.8426	0.00607805	0.0169747	0.213994	0.968106	0.91112	0.334474
866.837	12.8467	0.280399	0.0305659	0.247183	0.255209	0.897019	0.466823
938.377	12.8467	0.269625	0.22753	-0.274735	0.120306	0.180518	0.245708
939.366	12.8562	0.275782	0.0146642	-0.0888644	0.115304	0.927475	0.697865
938.885	12.8699	0.381612	0.185332	-0.0830217	0.198059	0.514713	0.834459
801.758	12.8871	0.34509	0.214243	0.235893	0.10943	0.296031	0.409441
800.754	12.8985	0.298586	0.255857	0.25963	0.109805	0.161855	0.300952
270.001	12.9007	0.000603864	-0.311789	-0.448452	0.996673	0.0570607	0.0537869
216.094	12.9043	0.346881	0.0312864	-0.579573	0.140587	0.88638	0.0894129
800.253	12.9118	0.239701	0.242557	0.306129	0.148603	0.144427	0.186862
764.735	12.9119	0.30575	0.0770223	0.161918	0.287894	0.78157	0.681132
874.836	12.9219	-0.70048	0.199852	0.419573	0.0891315	0.596119	0.436371
801.255	12.9267	0.301827	0.215741	0.205099	0.0844348	0.196891	0.371726
769.835	12.9286	-0.326403	0.130642	0.624646	0.478091	0.77342	0.343443
765.907	12.9296	-0.0837825	0.0637474	0.343654	0.674977	0.7491	0.242497
768.833	12.9344	-1.04513	0.146321	1.37777	0.265137	0.870944	0.296459
769.332	12.9344	-0.266082	0.161725	0.547983	0.472867	0.659244	0.304576
768.332	12.9385	-0.493191	0.131258	0.831467	0.361544	0.803264	0.281972
779.824	12.9385	-0.90434	0.108976	1.22094	0.256454	0.886565	0.276935
885.827	12.9409	-0.119008	0.184791	0.118075	0.65849	0.496336	0.755725
875.847	12.9419	-0.125161	0.171205	0.307974	0.747613	0.660751	0.578145
421.131	12.9495	0.345063	0.0700421	-0.413894	0.209475	0.788785	0.280445
875.325	12.9532	-0.194008	0.112843	-0.0246952	0.425827	0.638646	0.941658
787.81	12.9561	0.113252	0.0645689	0.0942289	0.543612	0.727	0.718721
786.813	12.9561	0.2284	0.265928	-0.0108386	0.267728	0.202895	0.969097
779.318	12.9567	-0.0733476	0.0696918	0.375614	0.71441	0.727954	0.206973
790.816	12.9567	-0.0653239	0.108954	0.35066	0.757389	0.608372	0.259553
886.841	12.966	0.409534	0.183864	-0.128446	0.0981786	0.425176	0.689007
780.81	12.9702	0.050732	0.0489006	0.379156	0.797454	0.804586	0.198428
215.091	12.9748	0.139425	0.0251735	-0.295498	0.306015	0.848416	0.139903
791.749	12.9821	0.418635	0.378194	0.190092	0.178799	0.219777	0.648739
763.359	12.9846	0.153597	0.395262	0.0389624	0.430096	0.0649409	0.885204
888.874	13.0007	-0.108404	0.0139185	0.344806	0.723141	0.963572	0.433057
770.837	13.0009	-0.104732	0.0336056	0.340711	0.695509	0.899609	0.37786
887.876	13.0013	-0.104335	0.194292	0.116263	0.773345	0.594194	0.820296
238.072	13.009	0.280058	0.0442978	-0.240202	0.243505	0.847114	0.467033
220.062	13.0152	0.24967	0.213934	-0.808828	0.160246	0.22135	0.00755642
854.865	13.022	0.0884941	0.263145	0.381512	0.767663	0.389954	0.378703
802.752	13.031	0.411978	0.157276	-0.0129483	0.171695	0.582323	0.974202
920.638	13.034	0.254175	-0.0196845	0.160723	0.582028	0.965659	0.804074
853.875	13.0428	0.117544	0.332477	0.548279	0.823521	0.53277	0.468995
825.857	13.0439	0.226659	0.176259	0.339155	0.286034	0.399971	0.260995
876.878	13.0503	0.190158	0.160104	0.289566	0.596751	0.655132	0.569448
911.826	13.0568	0.337429	0.0873544	0.127627	0.0567816	0.580527	0.56832
979.474	13.0583	-0.178494	-0.086858	0.337397	0.325348	0.623901	0.198935
854.367	13.0637	0.348934	0.116629	0.15541	0.254541	0.692375	0.709154
296.111	13.0714	0.035841	-0.0646872	0.0763898	0.821747	0.685396	0.734737
289.124	13.0729	0.281298	-0.0510943	-0.446162	0.134714	0.770196	0.0990064
295.119	13.074	-0.0889588	-0.02912	0.15692	0.564178	0.848826	0.474606
861.854	13.0812	0.0451434	0.0478799	0.440196	0.89664	0.89042	0.382223
404.191	13.1035	0.629621	0.204749	0.241541	0.0232928	0.389575	0.469719
596.296	13.1035	0.162156	0.104244	-0.514598	0.487435	0.652316	0.141033
206.046	13.1035	0.253149	0.0592201	-0.169291	0.244368	0.77628	0.568809
597.301	13.1053	0.206856	0.115039	-0.565078	0.415748	0.645932	0.135956
901.301	13.1145	0.250793	0.140203	0.25355	0.151097	0.400761	0.289331
331.139	13.1319	0.327567	-0.118724	-0.411354	0.244389	0.660927	0.296931
900.8	13.1341	0.198981	0.099466	0.382662	0.311584	0.603956	0.180088
901.814	13.1376	0.302362	0.0709306	0.248788	0.180294	0.739444	0.417891
485.122	13.1388	0.266709	0.0246311	-0.581653	0.239568	0.90948	0.0857363
228.07	13.1678	0.0736007	0.000246291	-0.093504	0.858043	0.999522	0.87232
442.173	13.1898	0.446269	0.183361	-0.369441	0.0917497	0.453946	0.294693
132.074	13.2001	0.71312	-0.227257	-0.234049	0.00611437	0.273212	0.416495
239.066	13.2005	0.0230238	-0.0809485	-0.016381	0.865203	0.554815	0.931893
158.084	13.2026	0.339519	0.0800977	-0.305594	0.216709	0.759803	0.418171
250.055	13.212	-0.122436	0.0301489	0.0205642	0.600623	0.896561	0.949981
229.108	13.2274	0.228852	-0.13665	-0.032307	0.397217	0.607818	0.931053
131.072	13.2314	0.720151	-0.0680925	-0.104609	0.00121228	0.656276	0.629156
409.116	13.2333	0.240249	-0.00629338	-0.185489	0.408953	0.982349	0.647009
547.732	13.2601	0.0839038	-0.147972	-0.100953	0.536787	0.288022	0.597971
902.835	13.2622	0.194864	-0.0635794	0.276904	0.378106	0.768574	0.375932
902.329	13.2639	0.292392	0.0471349	0.117995	0.177673	0.817674	0.684318
307.091	13.2707	0.244642	0.197181	-0.397469	0.242824	0.339188	0.185448
370.093	13.2845	0.0564423	-0.0231447	0.100793	0.750343	0.895903	0.688423
185.082	13.2867	0.184656	-0.135309	-0.23919	0.334701	0.473499	0.374641
318.127	13.2869	0.462861	0.0473563	-0.440574	0.0670068	0.833849	0.191782
152.547	13.2906	0.105205	-0.406904	-0.539598	0.84957	0.470354	0.497579
193.067	13.3211	-0.427399	0.254123	0.137437	0.183056	0.411365	0.748834
192.067	13.3211	-0.878463	0.253238	0.593507	0.0291382	0.46642	0.240712
495.119	13.3231	-0.466423	-0.089875	0.916	0.169024	0.77822	0.0689957
348.087	13.3231	-0.376011	-0.0899486	0.793294	0.277225	0.787388	0.120161
517.111	13.3251	-0.128646	-0.0925178	0.521071	0.677333	0.764124	0.251332
518.114	13.3311	0.0943558	-0.104812	0.169287	0.717281	0.687818	0.646826
593.1	13.3311	-0.00860452	0.0451539	0.0674317	0.978207	0.886084	0.879764
496.124	13.3331	-0.326304	-0.0648406	0.713366	0.319246	0.83814	0.139279
317.124	13.337	0.334669	0.000419667	-0.31051	0.164373	0.998515	0.344667
345.924	13.3405	0.206264	-0.00606732	-0.429807	0.522208	0.984777	0.352997
991.247	13.3462	-0.480589	-0.00265239	0.911485	0.44965	0.996607	0.317561
493.559	13.3462	-0.11167	-0.0181639	0.45894	0.788319	0.965085	0.443063
185.028	13.3526	-0.346455	-0.700322	0.885107	0.290633	0.0514943	0.0752085
351.018	13.3577	0.334159	0.083077	-0.579799	0.253323	0.767403	0.169439
153.02	13.3633	-0.12737	-0.179305	-0.485005	0.667171	0.547281	0.263789
154.023	13.3702	0.225467	-0.194628	-0.777964	0.517329	0.5749	0.137042
350.091	13.3706	0.0600772	0.0246999	0.0784638	0.764444	0.901712	0.781894
353.091	13.3716	0.184187	-0.185613	-0.178695	0.481618	0.478338	0.626325
231.087	13.3737	0.35744	0.0609299	-0.562056	0.216218	0.824706	0.173804
142.051	13.3886	0.438621	-0.00764976	-0.00389756	0.0355722	0.965964	0.987734
375.162	13.3889	0.265155	0.0513484	-0.246532	0.175773	0.78094	0.357424
263.019	13.3889	0.260949	0.0312571	-0.534129	0.486738	0.932554	0.322132
141.089	13.3962	0.352901	-0.163806	-0.416604	0.179225	0.513731	0.254071
121.029	13.3962	-0.0468642	0.167968	-0.351492	0.837147	0.468448	0.292739
127.075	13.4035	0.473669	0.0558284	-0.547011	0.0989714	0.831406	0.166016
230.106	13.4088	0.158153	-0.261748	-0.0443317	0.25563	0.0772843	0.814354
791.257	13.4101	0.0583111	0.233525	0.0404751	0.784712	0.290635	0.893139
398.121	13.4337	0.334001	-0.0210429	-0.318229	0.136029	0.919407	0.296572
808.745	13.4359	0.359711	-0.0629653	0.271859	0.126553	0.77294	0.388784
644.791	13.436	0.186342	1.42706	-0.257754	0.67645	0.0106022	0.683075
397.116	13.4491	0.273362	-0.000403859	-0.461053	0.355573	0.99888	0.275935
293.069	13.4597	0.0989428	-0.072206	-0.185133	0.665651	0.751808	0.569258
146.022	13.4901	-0.350897	-0.100435	-0.242273	0.225241	0.716604	0.539102
838.797	13.4938	0.344788	0.0175612	0.321722	0.127829	0.933184	0.29492
652.308	13.4938	-0.041509	-0.0790037	0.291816	0.670814	0.425535	0.0596615
616.351	13.4961	-0.308324	-0.211634	0.551391	0.21173	0.378769	0.124423
617.341	13.4981	-0.00292011	-0.119554	0.0574666	0.97448	0.21359	0.658266
618.363	13.4981	-0.381727	-0.167593	0.501373	0.213985	0.569767	0.245332
379.107	13.5024	0.159162	0.184452	-0.143952	0.602805	0.547677	0.737968
241.108	13.5125	0.279028	-0.234401	-0.0111513	0.160406	0.229891	0.966197
625.14	13.5142	0.334507	-0.177215	-0.297108	0.478097	0.703725	0.652726
407.121	13.5158	0.104437	0.0796582	-0.10261	0.557991	0.65348	0.68227
201.113	13.5223	-0.195031	0.0668591	0.225402	0.150743	0.600809	0.230296
443.168	13.5397	0.159995	-0.380773	-0.340384	0.535188	0.161651	0.358263
146.063	13.5407	0.140288	-0.19223	-0.430068	0.489324	0.349822	0.154871
263.518	13.5512	0.384243	0.0276786	-0.717452	0.504297	0.96107	0.382983
549.028	13.5568	0.202258	-0.0428144	-0.315638	0.675191	0.928928	0.644207
262.015	13.5652	0.272818	0.238133	-0.546284	0.469957	0.526584	0.314219
262.515	13.5652	0.360853	0.226232	-0.641165	0.422437	0.610484	0.319162
190.051	13.5749	-0.150729	-0.163409	-0.18793	0.257998	0.223274	0.314298
224.057	13.5827	0.33526	0.221601	-0.290371	0.281692	0.46738	0.499681
527.047	13.6047	0.193744	0.0368254	-0.389728	0.6813	0.937446	0.561301
336.08	13.6056	0.182117	0.095978	-0.360781	0.223188	0.506183	0.101509
528.054	13.6091	0.199136	0.0140049	-0.336188	0.646123	0.974061	0.584701
462.093	13.6191	-0.0404349	0.135315	-0.166731	0.847291	0.524348	0.577893
430.089	13.6347	0.130398	0.501545	-0.47442	0.769411	0.277005	0.457715
429.084	13.6362	0.0247877	0.539743	-0.377474	0.958541	0.276482	0.579462
280.12	13.6384	-0.0546995	0.0549307	-0.20787	0.81363	0.81286	0.531007
526.039	13.6388	0.292954	0.316206	-0.58629	0.505928	0.473802	0.353268
859.191	13.6406	0.333696	0.84749	-0.603812	0.595542	0.197985	0.499506
487.038	13.6469	0.2382	0.322997	-0.341133	0.574931	0.450814	0.570197
525.034	13.6502	0.185699	0.30561	-0.451686	0.647302	0.456643	0.437348
461.083	13.6542	-0.155217	0.148697	-0.0982139	0.533592	0.550508	0.778411
337.041	13.6609	0.21847	-0.0341125	-0.112539	0.253898	0.85257	0.666205
338.046	13.6633	0.252948	0.0171139	-0.271151	0.197596	0.926597	0.317918
365.123	13.6656	0.31387	0.0370934	-0.25429	0.0974097	0.830041	0.313688
186.106	13.6775	-0.350521	-0.423535	0.392236	0.131047	0.0765579	0.219873
956.357	13.6899	0.125686	0.222284	-0.161438	0.580546	0.338275	0.615132
279.112	13.7056	-0.380198	-0.138968	-0.0976307	0.0313256	0.368722	0.648723
329.158	13.7091	0.272131	-0.00745763	-0.19911	0.170077	0.968056	0.457842
271.118	13.7139	0.321947	-0.0845313	0.264971	0.0590267	0.579459	0.236372
253.036	13.7154	0.0283979	-0.063152	-0.0723797	0.914076	0.81065	0.845945
367.007	13.7165	0.0873366	0.287533	-0.523894	0.698322	0.222411	0.126695
367.107	13.717	0.30938	-0.171053	-0.174837	0.316646	0.571133	0.680771
846.863	13.737	0.102763	0.858252	0.351041	0.889362	0.264695	0.737626
865.355	13.7373	0.20243	0.239211	-0.669957	0.498919	0.426935	0.136027
866.356	13.7479	0.305388	0.301275	-0.556892	0.135193	0.139823	0.064535
845.861	13.7533	-0.108388	0.855608	0.581813	0.89515	0.31419	0.619567
339.037	13.7541	0.34492	0.0134198	-0.274415	0.129859	0.949244	0.370068
172.098	13.7542	-0.338753	-0.32091	0.434853	0.221271	0.244317	0.262956
833.854	13.7777	0.406735	0.133604	0.161439	0.494518	0.820037	0.845808
832.853	13.7777	0.194365	0.115138	0.434493	0.759665	0.855909	0.630254
358.023	13.7846	0.140766	-0.161691	-0.0398901	0.379762	0.316765	0.856864
769.504	13.8117	-0.122695	-0.0506692	-0.0622077	0.600832	0.827673	0.850051
715.807	13.8195	0.068741	-0.167071	0.167918	0.7396	0.427176	0.568632
333.113	13.8252	0.0618249	-0.117476	-0.128078	0.671214	0.426849	0.536787
359.131	13.8265	0.304164	0.0250484	-0.252675	0.163042	0.902451	0.393215
249.083	13.8278	0.343855	-0.0409943	-0.285487	0.121116	0.841374	0.338436
714.811	13.8304	-0.119108	-0.198297	0.344426	0.416409	0.191512	0.117832
379.155	13.8321	0.299136	-0.0669955	-0.261577	0.104058	0.692098	0.28972
379.009	13.8364	0.233593	-0.153821	-0.154796	0.214465	0.400497	0.54513
325.095	13.8426	0.329092	-0.00345542	-0.444086	0.253357	0.990006	0.274003
431.098	13.846	-0.0214766	0.261234	-0.0347846	0.970418	0.65407	0.966124
459.102	13.8667	-0.0261213	0.258796	-0.2326	0.942722	0.483612	0.65309
460.109	13.872	0.15428	0.221772	-0.332802	0.593743	0.447629	0.421442
547.021	13.8747	0.30623	0.152164	-0.48188	0.49616	0.732311	0.450508
692.122	13.9155	0.489902	0.018405	-0.409583	0.189804	0.958391	0.42158
847.859	13.9413	-0.154356	0.207541	1.13166	0.792961	0.724641	0.197085
691.122	13.9481	0.644137	-0.107635	-0.424096	0.0918093	0.75716	0.398642
858.848	13.95	0.310088	0.198382	0.705836	0.469573	0.640247	0.256565
257.819	13.9523	0.159883	0.173268	-0.413507	0.618842	0.590311	0.371693
848.357	13.9565	0.182506	0.155211	0.699075	0.556916	0.616279	0.135446
483.114	13.9615	0.40491	0.028883	-0.582789	0.112246	0.901873	0.106945
208.062	13.9692	0.536021	-0.211588	-0.249196	0.199901	0.596348	0.658247
598.118	13.9722	-0.00505788	-0.0839254	0.144237	0.985522	0.764008	0.715608
848.86	13.9724	0.0127786	0.139222	1.03069	0.979883	0.784045	0.176179
567.176	13.9725	-0.174937	0.780255	-0.365425	0.758734	0.194033	0.651249
182.081	13.9795	-0.386943	-0.744835	0.586145	0.448504	0.163575	0.418151
672.849	13.9805	0.218783	-0.334743	0.712527	0.63488	0.471798	0.288597
484.111	13.9824	0.350893	0.00869974	-0.555218	0.278256	0.977699	0.229319
283.083	13.9839	-0.820333	0.369939	0.718236	0.0911322	0.411814	0.26868
284.087	13.9882	-0.518198	0.368244	0.394743	0.227685	0.380339	0.501556
115.07	14.0039	0.132291	-0.323696	-0.149554	0.548162	0.163561	0.629749
202.11	14.0219	-0.232204	0.0156493	0.147301	0.286989	0.940609	0.622699
557.159	14.0279	0.104282	-0.105356	-0.192025	0.586082	0.582308	0.48123
341.035	14.0344	-0.101842	0.0844464	0.245655	0.69513	0.744823	0.507864
247.085	14.0417	-0.238389	-0.359703	0.431921	0.158516	0.0469321	0.0814685
248.056	14.071	0.251663	-0.470719	0.197971	0.588944	0.323184	0.762215
342.034	14.1089	0.378445	0.111924	-0.348242	0.11949	0.620144	0.28957
159.082	14.1295	0.0300148	-0.146806	0.00294024	0.734451	0.124094	0.981183
309.096	14.1364	0.231629	0.0249502	-0.279246	0.393343	0.924979	0.463972
310.097	14.1421	0.33147	0.0357767	-0.46025	0.206575	0.88574	0.214135
248.537	14.1623	0.492254	-0.673911	0.206082	0.436062	0.294263	0.814351
111.083	14.1751	0.242228	-0.184889	-0.182842	0.345345	0.466022	0.607055
174.081	14.1827	0.0160201	-0.355204	0.449456	0.889505	0.0129981	0.0216373
173.083	14.1838	-0.151056	-0.31289	0.360887	0.25035	0.0332791	0.0696227
299.94	14.1891	-0.0280322	-0.0721883	-0.149905	0.926723	0.81307	0.728976
301.039	14.1893	0.167309	0.00420252	-0.25581	0.414527	0.983284	0.37939
172.543	14.1895	0.129395	-0.42569	0.0563197	0.644365	0.153278	0.886311
333.921	14.1993	0.0968189	0.126515	-0.360102	0.761217	0.691925	0.432201
535.178	14.1999	0.190107	0.162072	-0.156091	0.39868	0.469039	0.618748
335.916	14.2074	-0.0223488	-0.00618024	-0.316145	0.945364	0.984878	0.499467
195.064	14.2155	-0.0696105	-0.350273	0.373827	0.726623	0.105882	0.206349
107.051	14.2163	-0.497105	0.287264	-0.0296409	0.277924	0.520091	0.962058
151.04	14.2177	-0.0709342	-0.563025	0.149744	0.501008	0.000514297	0.323585
194.046	14.2277	-0.0153251	-0.0853513	-0.254091	0.952191	0.739329	0.488963
381.121	14.2427	0.235424	0.1455	-0.355556	0.405426	0.602076	0.375753
254.079	14.244	0.384845	-0.124442	-0.421758	0.17554	0.643693	0.282704
696.186	14.2462	-0.372205	-0.185759	0.26371	0.190241	0.49535	0.493749
189.009	14.2476	-0.583753	0.593643	0.0326034	0.227415	0.220344	0.960089
233.042	14.2494	0.132962	-0.241752	0.322327	0.316047	0.0877238	0.104107
737.192	14.2494	-0.263774	0.25249	-0.163591	0.286456	0.306125	0.629969
695.179	14.2751	-0.493334	-0.238126	0.406495	0.0643241	0.330885	0.24681
432.105	14.2769	0.341677	0.282568	-0.286178	0.417558	0.499716	0.626357
188.01	14.2772	-0.930883	0.609421	0.414477	0.121175	0.289201	0.600035
186.425	14.2781	-0.816577	0.622573	0.224733	0.161926	0.273872	0.771932
187.008	14.2781	-1.16184	0.572024	0.710174	0.0666409	0.326723	0.385916
614.208	14.2905	0.31068	0.187435	-0.363064	0.344627	0.561364	0.430657
179.037	14.2937	0.168798	-0.215577	-0.20367	0.431668	0.321175	0.499963
912.865	14.3041	-0.578354	0.651276	0.656027	0.307691	0.254779	0.407691
689.107	14.3054	0.443986	-0.052936	-0.435231	0.245024	0.884791	0.409816
254.997	14.3074	-0.170227	0.377888	-0.0372162	0.673326	0.359898	0.947738
253.075	14.3107	0.23535	0.0150211	-0.298033	0.311185	0.946685	0.361389
610.312	14.3127	-0.0626337	0.00401966	-0.542942	0.806498	0.987433	0.15926
426.174	14.3188	0.34417	0.0477383	-0.353248	0.204811	0.852931	0.345766
386.175	14.3352	0.103219	0.0377436	-0.03981	0.462921	0.78518	0.838735
162.022	14.3459	-0.195194	-0.257859	-0.0518244	0.28249	0.166469	0.834153
184.098	14.3487	-0.244135	-0.0906509	0.44729	0.346179	0.719802	0.230883
513.072	14.3521	0.550955	-0.359925	-0.440935	0.325973	0.513557	0.570106
766.347	14.3647	0.468214	1.08702	0.0362412	0.029635	0.000279131	0.888614
784.842	14.3728	0.921952	1.49029	-0.445597	0.0352821	0.00349124	0.412493
397.007	14.3765	-0.606427	0.814689	-0.256152	0.304419	0.178657	0.751511
766.854	14.3788	0.303027	1.70423	0.245011	0.461849	0.00245725	0.670303
163.032	14.3842	-0.316158	0.13022	-0.207612	0.23924	0.61465	0.57119
767.855	14.3865	0.446368	1.41026	0.0140227	0.168704	0.00138961	0.97401
777.845	14.3865	0.916063	1.84893	-0.436422	0.0334153	0.000846964	0.412798
545.028	14.3872	0.290856	0.0824508	-0.598658	0.454451	0.82924	0.285649
773.358	14.3903	0.201073	0.213821	-0.0988892	0.00874553	0.00635943	0.265055
774.35	14.3942	0.238331	0.185482	-0.254664	0.0224573	0.0594099	0.0656403
119.052	14.4101	-0.291077	-0.00792748	-0.177258	0.303816	0.976859	0.648742
335.085	14.4446	0.246628	-0.0113961	-0.132981	0.117561	0.937403	0.522541
418.168	14.4513	0.155456	0.0848208	-0.115232	0.0888386	0.321576	0.339838
549.162	14.4541	-0.168504	-0.0236945	-0.0401379	0.245656	0.864541	0.838152
395.101	14.4583	0.339734	-0.0789508	-0.309024	0.210147	0.759622	0.406376
165.056	14.4594	-0.347059	-0.366548	0.100675	0.312127	0.287509	0.830417
166.058	14.4594	-0.13218	-0.320021	-0.142969	0.654154	0.292642	0.731166
550.168	14.4967	-0.0694142	-0.0101302	-0.0492575	0.52781	0.925639	0.749032
237.08	14.501	0.00621261	0.115308	-0.354035	0.975143	0.567235	0.231319
394.122	14.5092	0.318361	0.197025	-0.490732	0.121163	0.314542	0.0954441
374.137	14.5598	0.364538	-0.0782746	-0.101603	0.110074	0.709677	0.732388
829.392	14.6163	0.0927046	-0.0410468	0.0267329	0.274572	0.617591	0.816993
287.118	14.6221	0.318791	-0.0553062	-0.245592	0.30157	0.852843	0.564122
349.988	14.6477	-0.0221037	0.166427	-0.479746	0.898623	0.3511	0.0782717
828.42	14.6483	-0.116997	-0.0653197	0.401553	0.3661	0.607281	0.0485353
794.45	14.6483	-0.114976	-0.145645	0.245036	0.224997	0.134359	0.0828601
999.543	14.6529	-0.228246	-0.0713727	0.145791	0.327543	0.752736	0.650234
792.458	14.6529	-0.513933	-0.197267	0.793578	0.176523	0.584977	0.144204
288.121	14.6544	0.625162	0.0622118	-0.754767	0.0575156	0.830969	0.0951277
793.456	14.6559	-0.271213	-0.197798	0.514954	0.241079	0.382793	0.127565
368.919	14.6728	0.429054	0.174184	-0.645421	0.209049	0.594312	0.184243
347.133	14.6774	0.103488	-0.299896	0.41775	0.601962	0.154273	0.15979
489.136	14.682	0.216422	-0.0510531	-0.228539	0.410533	0.842826	0.534929
206.082	14.7051	-0.113963	0.0386467	0.0606245	0.636186	0.871728	0.857887
366.922	14.7068	0.381425	0.119079	-0.604566	0.266277	0.718767	0.217235
439.132	14.7105	0.321718	-0.106458	-0.381807	0.241496	0.68654	0.319452
219.06	14.7105	0.0453453	-0.0199838	0.0906335	0.740158	0.883461	0.640464
307.086	14.7125	0.250702	0.0170909	-0.172935	0.18457	0.923586	0.49892
308.091	14.7313	0.266681	-0.108608	-0.220935	0.16248	0.548397	0.393762
217.108	14.7727	0.246959	-0.0793187	0.0308592	0.227912	0.685957	0.910988
317.032	14.7942	0.406251	0.0364132	-0.195472	0.260412	0.916229	0.691117
571.038	14.8272	0.108268	0.00746643	-0.254807	0.779039	0.984523	0.642069
967.49	14.8308	-0.0591065	0.0657496	0.133366	0.665758	0.631344	0.494695
361.146	14.878	0.324095	-0.0116871	0.0618485	0.209391	0.961947	0.858441
396.009	14.8971	0.0684812	-0.0137328	-0.401773	0.779053	0.955023	0.263056
343.139	14.9058	0.253459	-0.036596	-0.291286	0.188492	0.840753	0.276345
279.09	14.9213	0.344997	0.0791356	-0.500408	0.233267	0.774933	0.222551
364.997	14.9251	0.154306	0.207551	-0.549239	0.655782	0.550877	0.277573
207.071	14.9294	-0.0135201	-0.113767	0.146732	0.899022	0.302435	0.344238
164.039	14.9472	-0.252368	-0.0809951	-0.454412	0.252748	0.702767	0.155229
441.15	14.9577	0.406964	-0.0770727	-0.358893	0.107648	0.74039	0.291373
579.175	14.9777	-0.565168	-0.207917	0.0344331	0.00546638	0.202893	0.87501
844.394	14.9808	-0.230084	-0.181334	0.217517	0.233848	0.339876	0.414396
120.046	14.9832	0.0452931	-0.093008	-0.928843	0.910386	0.81746	0.130581
236.091	14.9832	-0.316332	0.234435	-0.116905	0.263801	0.399099	0.761509
225.04	14.9837	0.139492	-0.258849	-0.0899361	0.649746	0.406927	0.835115
615.159	14.9993	-0.465342	-0.0618353	-0.0201615	0.0182233	0.704612	0.930039
843.389	15.0044	-0.296053	-0.175181	0.324609	0.138276	0.358455	0.237567
625.176	15.0085	-0.199062	-0.177867	-0.220894	0.518687	0.56311	0.610722
456.195	15.0216	0.345963	0.0902518	-0.100126	0.0910477	0.629864	0.704571
157.087	15.0421	0.0870475	0.215893	-0.105816	0.582964	0.193685	0.636094
474.202	15.0468	0.330622	0.0363387	-0.260793	0.110251	0.848452	0.345841
175.09	15.068	0.152182	-0.0932323	-0.158745	0.471088	0.65542	0.592159
289.039	15.0705	0.0681219	-0.169692	-0.381293	0.741839	0.420247	0.214004
393.122	15.0718	0.364763	-0.0193481	-0.0299478	0.26801	0.951202	0.946599
218.091	15.072	0.410102	0.493036	-0.470046	0.166442	0.104621	0.252316
281.107	15.076	0.0129012	0.0251481	0.0573764	0.892019	0.791651	0.671108
477.175	15.0805	-0.0218486	-0.173559	0.116437	0.86563	0.202559	0.528733
447.099	15.0807	-0.0953876	0.11355	0.00981261	0.788403	0.749594	0.984387
478.185	15.1107	0.0365165	-0.106505	-0.116901	0.823311	0.519928	0.615602
522.214	15.1233	0.291526	0.278363	-0.446407	0.166341	0.184046	0.137818
273.134	15.1496	0.203991	0.12051	-0.456271	0.450266	0.65166	0.244786
305.159	15.1815	0.254738	-0.012373	-0.092815	0.0961588	0.9293	0.640234
269.045	15.1916	-0.281268	0.0743599	-0.281369	0.549304	0.872835	0.670066
539.021	15.2041	0.183372	-0.128264	-0.262553	0.702905	0.789137	0.699423
443.683	15.2178	0.327519	0.404063	-0.809606	0.55953	0.474101	0.318314
409.124	15.2218	0.103233	0.00285778	-0.303516	0.630062	0.98928	0.328334
204.067	15.2277	-0.244702	-0.0834326	0.387548	0.11941	0.568637	0.0866565
205.07	15.2277	-0.0800182	-0.0769087	0.234038	0.547379	0.562705	0.230055
590.004	15.2294	0.189995	0.116243	-0.419805	0.610971	0.754368	0.432231
445.081	15.2324	-0.124916	0.493934	-0.278845	0.779415	0.285115	0.65964
410.14	15.2362	0.0780715	-0.0373935	-0.273865	0.729555	0.868087	0.400363
450.166	15.242	0.058664	0.111704	-0.232127	0.781753	0.600225	0.445888
512.215	15.2443	0.558528	0.210797	-0.527492	0.0742754	0.460932	0.207791
245.097	15.2552	0.0361218	0.196039	-0.135945	0.809215	0.212615	0.52528
231.121	15.2561	0.177326	0.0837845	-0.286178	0.331242	0.63817	0.271777
492.199	15.2628	0.334955	0.187991	-0.402242	0.0245005	0.159356	0.0468594
449.115	15.2675	0.417417	0.101064	-0.19294	0.210566	0.750196	0.668196
246.097	15.2825	0.424783	0.177981	-0.522214	0.177096	0.55239	0.234179
220.062	15.2862	0.0328605	-0.125242	-0.0106167	0.865289	0.52313	0.969057
244.333	15.2864	0.319304	0.270901	-0.663117	0.206746	0.27735	0.0783615
199.097	15.3009	0.170687	-0.0527428	-0.181942	0.382065	0.782291	0.505466
141.092	15.3053	0.444154	-0.070851	-0.242748	0.0397345	0.705762	0.370838
271.112	15.3119	0.378684	0.0588495	-0.432315	0.0912164	0.773099	0.159893
197.08	15.3139	-0.0335822	0.231323	-0.656974	0.82618	0.156668	0.0138265
890.468	15.3569	-0.0362689	-0.241246	0.334059	0.838093	0.197897	0.206458
262.118	15.3664	-0.056918	-0.254314	0.224877	0.863593	0.450821	0.633475
313.128	15.3925	0.295629	0.127138	-0.0563649	0.0629421	0.380427	0.778456
169.087	15.4091	0.192337	-0.0584349	-0.0958102	0.223948	0.699293	0.65481
211.04	15.4101	0.127808	-0.181807	-0.00800475	0.645124	0.515327	0.983613
261.134	15.4235	-0.407128	-0.436317	0.7923	0.228213	0.199529	0.110287
339.111	15.4235	0.385246	0.156228	-0.522619	0.208006	0.593788	0.225325
423.133	15.4244	0.260946	0.0734522	-0.29644	0.325551	0.775644	0.424602
249.081	15.4244	0.143493	-0.046557	-0.094318	0.324908	0.742396	0.638998
285.041	15.4253	0.334438	0.0309829	-0.311183	0.356496	0.930001	0.537734
278.104	15.4361	0.330245	0.35913	-0.219427	0.172597	0.142035	0.501617
275.127	15.4468	0.0711914	0.26225	-0.299006	0.364595	0.00761064	0.0213256
677.188	15.4591	-0.235706	0.0188918	-0.149166	0.132352	0.896485	0.474847
301.129	15.4774	0.328719	0.212817	-0.322709	0.4692	0.636022	0.612224
185.082	15.5002	0.179179	-0.0146892	-0.0762957	0.0637735	0.86447	0.535536
387.174	15.5529	0.291585	0.0225146	-0.181524	0.0318077	0.846123	0.286153
270.1	15.5561	0.134995	0.140579	-0.256523	0.330053	0.311658	0.200987
515.087	15.5705	0.663276	0.295182	-0.628457	0.0957509	0.425228	0.241543
656.203	15.5729	-0.188431	-0.0975968	-0.0949909	0.169301	0.456469	0.604874
329.123	15.5753	0.279979	0.0818846	-0.205655	0.214505	0.703649	0.503607
296.052	15.58	0.369833	-0.0578317	-0.0134353	0.40566	0.894218	0.982563
315.144	15.585	0.214411	0.0181178	-0.154721	0.277377	0.923968	0.568468
609.184	15.5902	-0.809321	-0.214606	0.362324	0.00759753	0.375103	0.294699
610.19	15.5902	-0.597652	-0.208967	0.185855	0.00480053	0.213947	0.420528
611.206	15.6358	-0.103633	-0.0843027	-0.131532	0.385722	0.47682	0.43414
254.091	15.6506	0.781394	0.607854	-1.38162	0.118005	0.21021	0.059962
267.09	15.6564	0.151569	0.0548965	-0.177538	0.5063	0.807405	0.580294
311.11	15.6735	0.269802	0.230914	-0.445663	0.360315	0.430372	0.2899
337.097	15.7446	0.440285	0.160012	-0.466945	0.105256	0.52556	0.208058
163.077	15.7595	0.0573801	-0.0823986	0.0310406	0.582619	0.434717	0.832099
400.999	15.7736	0.249632	0.429392	-0.843813	0.44728	0.206523	0.092516
359.161	15.7765	-0.117564	0.102508	0.0933878	0.582946	0.6313	0.756169
189.109	15.8069	-0.18545	0.17273	0.393675	0.488932	0.518366	0.30798
400.202	15.8077	-0.0796728	-0.0212962	0.108269	0.52507	0.863442	0.540992
335.024	15.8635	0.198708	0.446215	-0.84317	0.635943	0.301362	0.178138
437.147	15.8643	0.393371	0.236425	-0.289829	0.248183	0.475538	0.534587
160.049	15.8797	-0.0113928	0.28698	-0.120892	0.930715	0.0537209	0.519789
253.053	15.8831	0.242958	0.896185	-0.804458	0.608725	0.0850134	0.247606
334.012	15.8855	0.194522	0.78632	-1.09452	0.617444	0.0689187	0.0725542
630.819	15.8978	0.105429	0.0466515	0.143043	0.835354	0.92664	0.841935
333.008	15.8978	0.0519594	0.788873	-1.01074	0.899362	0.0828014	0.110294
612.832	15.9291	-0.0817745	0.0511011	0.196841	0.841738	0.900623	0.734596
517.037	15.9361	0.53435	-0.509286	-0.285322	0.331024	0.352887	0.70621
945.548	15.9439	0.377199	0.382778	0.265495	0.394384	0.387755	0.666069
193.053	15.9534	-0.0800915	-0.279889	0.351897	0.732744	0.251569	0.303859
837.263	15.9552	0.132274	-0.136361	-0.0619669	0.7432	0.735614	0.913306
415.816	15.9582	-0.304768	-0.261232	0.398805	0.388692	0.457145	0.423523
417.12	15.9633	-0.762874	-0.352691	1.06185	0.145778	0.477621	0.151426
622.201	15.9784	0.166691	-0.0274948	0.191148	0.535294	0.917545	0.613668
309.101	15.9796	0.269607	0.0832053	-0.296106	0.304688	0.74373	0.419145
418.124	15.9806	-0.618515	-0.320627	0.876218	0.159219	0.444289	0.158588
835.249	15.9853	-0.585667	-0.390046	0.719248	0.38487	0.557418	0.44779
836.252	15.9867	-0.0656986	-0.3164	0.190374	0.912299	0.599018	0.821681
255.102	15.9872	0.489328	0.275607	-0.811378	0.295993	0.546434	0.226269
485.181	15.9923	-0.240876	-0.14086	0.610027	0.0389968	0.187377	0.00224217
256.094	15.9927	0.439685	0.21367	-0.441677	0.306245	0.609764	0.459899
737.221	16.006	-0.0451312	-0.103419	0.234329	0.849486	0.665227	0.492224
486.185	16.0068	-0.108126	-0.0867488	0.465645	0.293406	0.393312	0.00903058
243.114	16.0125	0.0255837	0.170044	0.158507	0.920701	0.513993	0.664598
956.483	16.0156	-0.474453	-0.159073	0.506488	0.178691	0.634433	0.29815
957.48	16.0177	-0.322701	-0.123222	0.351716	0.295134	0.680122	0.413098
715.229	16.0286	-0.590235	-0.144178	0.702949	0.340918	0.810877	0.418619
716.236	16.0292	0.0900217	-0.106395	-0.03537	0.863099	0.838578	0.961757
296.165	16.0308	0.287694	0.0625277	-0.28965	0.473013	0.874056	0.60648
156.067	16.0362	-0.192561	0.0602163	0.698325	0.420479	0.797307	0.0610993
595.205	16.046	0.0386564	0.190473	-0.0838225	0.942282	0.722343	0.911626
126.103	16.0513	0.24545	-0.129598	-0.349021	0.609613	0.786174	0.607687
597.211	16.0515	0.331868	0.127541	-0.248906	0.345074	0.709845	0.609103
298.102	16.0578	0.004349	0.0376875	0.0678375	0.988183	0.897925	0.870342
596.211	16.0578	0.221904	0.249409	-0.264979	0.674131	0.637005	0.722114
297.098	16.0582	-0.110482	0.0320197	0.228692	0.705827	0.912514	0.582604
347.932	16.0614	0.182011	0.0840799	-0.137177	0.626973	0.821295	0.794523
125.097	16.0679	-0.109578	-0.102636	0.206296	0.559423	0.584062	0.440987
188.097	16.076	-0.596488	-0.0592251	1.02305	0.0683403	0.839624	0.0339832
397.17	16.0786	-0.321131	-0.232444	0.686801	0.204798	0.346963	0.070281
363.024	16.0886	0.0284841	0.256341	-0.742457	0.951548	0.588072	0.281214
367.022	16.0906	0.228297	0.0982776	-0.665515	0.588142	0.814241	0.278421
186.515	16.0906	-0.481607	-0.170031	0.620234	0.0181421	0.326534	0.0272575
527.202	16.0923	0.198888	0.231817	-0.381223	0.50722	0.441844	0.374308
349.932	16.0971	-0.0678173	-0.458784	0.498182	0.808171	0.127989	0.228638
187.098	16.099	-0.94236	-0.160141	1.18301	0.0454781	0.698074	0.068841
538.111	16.1074	-0.000895887	0.067277	-0.15311	0.996511	0.743498	0.600497
209.08	16.112	-0.347799	-0.225055	0.741833	0.202796	0.395584	0.0697762
529.067	16.116	0.348731	-0.319931	-0.0318653	0.322845	0.362058	0.947397
229.109	16.1174	-0.0198116	0.395689	-0.497612	0.965025	0.392629	0.444914
539.112	16.1311	0.260196	-0.0802453	-0.14398	0.23205	0.700466	0.626515
230.109	16.1425	0.0793931	0.42315	-0.443532	0.828345	0.266654	0.401972
530.072	16.1425	0.432713	-0.274901	-0.234607	0.246161	0.449569	0.644256
809.387	16.1769	-0.395757	0.130394	0.00846642	0.346773	0.750349	0.988306
218.021	16.1777	0.18269	-0.01995	-0.512529	0.538192	0.945742	0.237879
217.021	16.1976	-0.00422666	0.0295179	-0.400812	0.989492	0.926738	0.388886
144.046	16.1982	-0.375166	0.0477993	-0.000710395	0.0787005	0.803895	0.997914
293.106	16.2071	0.00385105	-0.00343169	-0.0382081	0.981454	0.983473	0.870561
287.023	16.2335	-0.135818	0.0864668	-0.0514184	0.454685	0.630398	0.838668
227.093	16.2424	-0.307422	0.0966163	0.31021	0.461566	0.814089	0.596168
228.097	16.2505	-0.36078	0.0816848	0.302757	0.336674	0.822813	0.561021
290.089	16.2678	0.329437	0.175534	-0.187067	0.379492	0.633486	0.718489
605.226	16.2859	0.165052	-0.169887	-0.406309	0.549296	0.537939	0.308215
221.082	16.3862	-0.364008	-0.0440985	0.890757	0.102491	0.828871	0.012805
404.063	16.4287	-0.0396311	-0.240676	-0.137048	0.927827	0.585846	0.824943
580.225	16.4454	0.118445	0.226002	-0.835985	0.575103	0.297245	0.0194027
375.171	16.4528	-0.0188112	0.0841843	-0.0994762	0.929888	0.695154	0.742968
543.195	16.4568	0.101777	0.0340156	-0.0749745	0.639947	0.874976	0.806503
442.011	16.4719	-0.260645	-0.145603	0.0842859	0.468615	0.682042	0.866218
280.983	16.476	0.0373685	-0.407729	-0.670394	0.956316	0.554596	0.4938
283.912	16.4779	0.092389	-0.657483	-0.897281	0.848539	0.197976	0.212526
200.89	16.4995	0.250679	-0.155788	-0.73538	0.302827	0.513078	0.0517234
403.057	16.5011	-0.0491056	-0.320922	-0.105022	0.928528	0.561991	0.892136
441.01	16.5017	-0.408998	-0.200569	0.116211	0.460598	0.713777	0.880111
579.225	16.5038	0.00951178	0.181762	-0.773196	0.980873	0.649097	0.192911
517.182	16.5241	0.470079	0.0720634	-0.589839	0.0437886	0.723468	0.066679
660.005	16.5257	-0.157471	-0.800265	-0.623687	0.786264	0.191941	0.454864
205.021	16.5316	0.0725289	-0.112254	-0.401951	0.816703	0.720445	0.375341
533.186	16.5348	0.121907	-0.0550887	-0.249013	0.561645	0.791318	0.40732
589.22	16.5412	0.440617	0.010322	-0.645188	0.108052	0.967236	0.0979433
427.036	16.542	-0.31182	-0.285327	0.0273542	0.572952	0.605377	0.971813
425.036	16.542	-0.648248	-0.331358	0.400431	0.40737	0.666749	0.712452
643.028	16.5478	-0.408138	-0.643082	0.153776	0.590452	0.40287	0.88498
204.023	16.5524	-0.319116	-0.19803	-0.13409	0.598512	0.742473	0.87465
121.063	16.5524	0.166052	-0.196855	-0.428102	0.536292	0.465688	0.272694
661.256	16.5553	0.591542	0.0709842	-0.852155	0.0512238	0.79039	0.0479222
426.04	16.5559	-0.419747	-0.309194	0.17658	0.491134	0.609517	0.835426
631.245	16.5594	-0.222478	0.0849579	0.00645775	0.631262	0.853645	0.99208
122.068	16.5594	0.36371	-0.208929	-0.888702	0.114735	0.339103	0.0156378
590.216	16.5632	-0.114697	-0.0100424	-0.139092	0.686213	0.971632	0.728653
202.026	16.5676	-0.0625683	-0.265726	-0.268489	0.883368	0.538081	0.65807
203.02	16.5676	-0.0192201	-0.257377	-0.319881	0.961884	0.527637	0.577718
200.396	16.5676	0.111408	-0.246334	-0.493883	0.751027	0.488437	0.333371
201.023	16.5697	-0.261484	-0.239318	0.00739738	0.61476	0.644624	0.9919
174.058	16.5757	-0.460954	-0.172735	-0.130418	0.0633449	0.44283	0.677845
811.215	16.5792	0.0719806	-0.156354	-0.446905	0.728884	0.457947	0.153654
79.9605	16.58	0.381045	-0.0879255	-0.896797	0.181941	0.744568	0.0410306
459.142	16.5835	-0.221245	0.168336	-0.342779	0.713802	0.779809	0.688097
460.15	16.5872	-0.107259	0.182002	-0.390804	0.835653	0.725521	0.595904
487.007	16.5916	-0.345693	-0.330014	0.289197	0.443044	0.463253	0.645899
559.198	16.5953	-0.105566	-0.0712253	0.0617681	0.741414	0.82348	0.891085
199.805	16.6044	-0.171222	-0.290717	-0.0134387	0.74704	0.586316	0.985669
575.217	16.6044	0.390601	-0.0195088	-0.621859	0.180731	0.943416	0.1374
571.205	16.6113	-0.1109	0.0702496	0.0657711	0.732685	0.828321	0.885746
197.808	16.6113	-0.242186	-0.289082	0.0934029	0.705137	0.652154	0.917453
195.81	16.6113	-0.173491	-0.366255	0.0103189	0.767339	0.536233	0.990044
535.127	16.6194	0.28373	-0.0719817	-0.305912	0.0451301	0.564042	0.108202
603.211	16.6235	-0.277085	0.0673711	0.0222917	0.662918	0.9151	0.980094
201.404	16.6265	-0.0277069	-0.107486	-0.418855	0.939398	0.76864	0.426046
573.222	16.6293	-0.0427484	0.0382583	-0.139933	0.906864	0.916601	0.78695
269.01	16.6297	-0.809038	-0.245603	1.04078	0.18823	0.673875	0.227022
473.123	16.6394	-0.184185	0.110491	0.178578	0.342701	0.561916	0.508838
534.166	16.6395	0.154737	-0.0194004	-0.288166	0.225009	0.873153	0.121621
601.214	16.6469	-0.28635	-0.00668376	0.0936775	0.512067	0.987616	0.877837
258.99	16.6549	-0.58065	0.0612839	0.682322	0.0530582	0.816837	0.096236
604.209	16.6642	0.234548	-0.0442934	-0.363625	0.214268	0.805338	0.177441
574.216	16.6703	0.304263	-0.00724405	-0.483853	0.0397874	0.954872	0.0247641
186.114	16.6756	-0.511437	-0.0328988	0.753281	0.0543909	0.888399	0.0470114
330.981	16.682	0.0467104	-0.103665	0.0171021	0.818987	0.613904	0.952679
577.209	16.6932	0.0177096	0.0740348	-0.226383	0.947024	0.781697	0.552696
395.007	16.6982	-0.73703	0.0423526	0.519823	0.156471	0.930602	0.457876
391.958	16.6988	-0.135361	0.0200519	0.0237202	0.72215	0.95782	0.964712
145.084	16.7038	-0.132107	0.0596903	0.257338	0.410142	0.704827	0.265566
587.212	16.7085	-0.159341	0.0218011	0.0184844	0.731114	0.962356	0.977425
259.817	16.7232	-0.0672214	-0.4491	0.263177	0.870126	0.292054	0.652704
137.025	16.7238	-0.709477	0.150654	-0.115274	0.0672201	0.665092	0.814023
93.0349	16.7242	0.0774419	0.195813	-1.17968	0.906932	0.768076	0.229893
361.028	16.7376	-0.414748	-0.219779	0.153803	0.0968532	0.348228	0.635214
255.822	16.751	-0.438306	-0.264817	0.558805	0.392408	0.59984	0.438685
629.214	16.7537	-0.201806	0.10753	0.0115075	0.550558	0.748409	0.980571
257.82	16.757	-0.278783	-0.22315	0.406237	0.463039	0.554449	0.450043
592.201	16.7664	0.196274	0.0513152	-0.372711	0.2023	0.725917	0.0991715
433.971	16.775	-0.235632	-0.134844	0.223358	0.638191	0.786843	0.751665
285.035	16.788	-0.0721549	0.104246	-0.092233	0.734582	0.625663	0.759105
648.802	16.8322	-0.365239	-0.12905	0.165806	0.0610846	0.463745	0.504344
138.024	16.8642	-0.213809	0.0734339	-0.0362077	0.179584	0.627099	0.864586
143.076	16.8845	0.361071	0.383375	-0.267373	0.197795	0.174242	0.483098
319.043	16.8869	0.156182	0.306161	-0.879324	0.632778	0.358759	0.0833952
191.061	16.9408	-0.00481971	0.193174	0.0662554	0.963713	0.0967143	0.660334
222.077	16.9443	-0.11532	0.0161923	0.47255	0.548083	0.932002	0.106745
190.052	16.9582	-0.229109	-0.0197368	0.563552	0.306045	0.927273	0.0937127
818.397	16.9726	0.0577989	0.00879845	0.0602828	0.616524	0.938743	0.710853
311.027	16.9752	-0.217668	0.232837	-0.282116	0.511848	0.483753	0.546832
249.039	16.9872	-0.801154	-0.553771	1.42575	0.18613	0.346752	0.106269
705.251	17.0033	0.197646	-0.0155023	-0.287619	0.30518	0.933638	0.292304
199.098	17.0293	-0.176079	0.0826966	0.354473	0.540483	0.771631	0.389374
783.322	17.0307	0.0334742	0.131928	-0.187526	0.884183	0.569754	0.56783
663.243	17.0315	0.335809	0.109148	-0.485965	0.1196	0.586691	0.112432
527.09	17.032	0.0108209	-0.0141703	-0.00430908	0.956022	0.942434	0.98761
337.038	17.0545	0.480673	0.0068905	-0.860575	0.342486	0.988813	0.237268
339.032	17.0592	-0.201196	-0.0990714	-0.193219	0.561989	0.773388	0.69201
352.016	17.0767	0.158341	0.132688	-0.56101	0.54683	0.612378	0.153662
722.264	17.0828	-0.45752	-0.047627	0.353988	0.294763	0.90997	0.556674
651.211	17.086	0.257267	-0.0103717	-0.315706	0.284168	0.964223	0.34838
713.225	17.086	-0.52669	-0.103422	0.622985	0.26551	0.820053	0.346005
736.904	17.0863	-0.113279	0.320803	0.151135	0.820391	0.525083	0.830365
687.215	17.0942	-0.591388	-0.08443	0.34791	0.30261	0.878912	0.658921
501.11	17.0991	0.130806	0.0164701	-0.0671162	0.396712	0.913012	0.753616
351.014	17.0993	-0.498443	0.2429	-0.139318	0.271813	0.581006	0.821417
608.206	17.1003	-0.206711	-0.00920622	0.110466	0.514536	0.976515	0.803154
749.279	17.1004	-0.290151	-0.0310012	0.173589	0.521683	0.944683	0.784017
694.256	17.1011	0.0896765	0.0434309	-0.125838	0.516294	0.750715	0.519465
682.246	17.1123	0.185923	0.149047	-0.273978	0.139598	0.224995	0.125815
607.21	17.113	-0.15811	0.0486801	-0.028993	0.636228	0.883449	0.950743
635.228	17.1133	-0.0906166	0.0215395	-0.0224777	0.804288	0.95294	0.965263
790.828	17.1135	-0.47125	0.208474	-0.30071	0.42459	0.719412	0.714104
707.251	17.1136	0.151263	-0.0644955	-0.200771	0.556119	0.800017	0.580141
738.278	17.114	-0.0542271	-0.269531	-0.0261042	0.788929	0.206122	0.927243
265.111	17.1148	-0.461744	0.0851617	0.336643	0.398776	0.873503	0.658106
709.242	17.1151	-0.203007	-0.0245704	0.0957084	0.573716	0.945152	0.849862
637.219	17.1193	-0.235233	-0.000182553	0.132291	0.563027	0.999638	0.816436
613.131	17.1275	-0.528833	-0.0539032	0.553674	0.331365	0.918655	0.465947
710.254	17.1277	0.182427	0.00106477	-0.265797	0.27518	0.994713	0.262002
712.251	17.1365	-0.030073	0.0584012	-0.0278291	0.901787	0.81086	0.935623
419.013	17.1402	-0.480316	0.051153	0.262622	0.196357	0.884394	0.600649
723.252	17.1402	-0.279363	-0.0136861	0.11343	0.534232	0.975397	0.856719
751.272	17.1402	-0.15286	0.0119509	-0.0443599	0.712158	0.976885	0.93939
721.26	17.1402	-0.154308	0.0766232	0.0191848	0.706445	0.851127	0.973463
725.256	17.1402	0.0328665	0.089031	-0.125387	0.909662	0.759193	0.760153
266.114	17.1402	-0.0300049	0.0482195	-0.156749	0.901499	0.842463	0.649593
612.163	17.1407	0.157639	-0.0873408	-0.218904	0.511178	0.713167	0.518639
697.256	17.1412	0.0926994	0.0418209	-0.167477	0.64447	0.834176	0.557234
854.354	17.1412	0.164586	-0.0553133	-0.23374	0.387473	0.766575	0.385573
708.254	17.1412	-0.110266	-0.000771323	0.0727959	0.731582	0.998078	0.872397
623.218	17.1435	0.266981	0.0786513	-0.344033	0.150516	0.652006	0.185453
739.267	17.1437	0.324441	-0.0750507	-0.450771	0.253402	0.783118	0.261159
320.039	17.1661	-0.538309	-0.218375	0.453336	0.245906	0.625208	0.477242
681.243	17.1666	-0.119221	-0.0488304	0.0700482	0.711198	0.879017	0.877296
742.268	17.167	0.40472	0.101614	-0.604147	0.196373	0.732582	0.175145
322.047	17.1672	-0.30881	-0.254033	0.297512	0.320264	0.408794	0.490948
324.048	17.1673	-0.102937	-0.207717	0.00406371	0.673219	0.402925	0.990552
321.044	17.1674	-0.448308	-0.263997	0.478484	0.236528	0.472708	0.362447
724.257	17.1675	-0.347321	-0.109091	0.288829	0.390807	0.782923	0.608215
323.044	17.1675	-0.695266	-0.242283	0.660396	0.210592	0.647965	0.387361
680.248	17.1692	-0.226417	-0.0127278	0.122156	0.562302	0.973728	0.823421
816.367	17.1694	0.0561464	-0.248992	0.11553	0.76348	0.20468	0.66256
711.257	17.1791	-0.0327283	0.0348659	-0.0834689	0.903105	0.896818	0.826414
324.458	17.1797	-0.0991803	-0.124632	-0.143061	0.655455	0.576427	0.649122
389.036	17.1903	-0.48019	-0.279794	0.683899	0.143	0.371675	0.140553
231.159	17.192	-0.137144	0.110174	0.0740552	0.538381	0.619589	0.812318
753.275	17.1953	-0.0154878	-0.0151125	-0.28163	0.925475	0.927275	0.249702
343.026	17.1964	-0.670955	-0.20717	0.840997	0.133055	0.619624	0.176632
679.239	17.1972	0.15114	0.025095	-0.298555	0.566193	0.923313	0.427581
344.029	17.1995	-0.304227	-0.259161	0.452542	0.163155	0.227128	0.144903
379.004	17.2048	-0.252341	0.00724195	0.416422	0.345989	0.977778	0.276265
381.014	17.2103	-0.265749	0.0775194	0.0141343	0.258087	0.731651	0.9646
457.021	17.2158	-0.282893	-0.190389	0.368728	0.319041	0.494914	0.356148
282.103	17.2216	0.0432214	0.209776	-0.119284	0.816434	0.277808	0.652145
262.096	17.2371	0.0470022	0.0517032	0.0937975	0.730921	0.705438	0.628789
235.067	17.2518	0.367307	0.0186303	-0.349568	0.183678	0.942971	0.356093
261.091	17.2543	-0.223269	0.207145	0.315974	0.517546	0.547486	0.517258
391.033	17.2618	-0.274971	-0.227561	0.375896	0.160452	0.236325	0.173177
281.106	17.2677	-0.167154	0.134089	0.0240961	0.625863	0.694912	0.960054
593.205	17.277	-0.217451	-0.0538738	0.107168	0.310602	0.795349	0.715822
229.017	17.2885	-0.822976	-0.269961	0.206735	0.233765	0.683796	0.824782
309.034	17.3108	0.240507	0.132526	-0.424112	0.370075	0.614945	0.270328
575.774	17.3618	-0.228103	-0.504663	0.3891	0.166398	0.0098105	0.103625
214.139	17.3759	-0.469039	-0.018929	0.535004	0.112871	0.944482	0.188917
189.112	17.3895	-0.220032	-0.000776976	0.378656	0.289133	0.9969	0.204492
263.113	17.4172	0.0289466	0.0924666	-0.0540024	0.699252	0.2366	0.611586
171.103	17.4217	-0.48768	-0.0810252	0.713045	0.144188	0.794793	0.132774
404.198	17.4653	-0.113969	0.0555574	0.0333241	0.734027	0.868069	0.943791
257.139	17.4727	-0.277584	0.036212	0.406617	0.567814	0.939962	0.554339
258.145	17.4891	-0.161523	0.0670876	0.333114	0.62419	0.837713	0.478775
240.138	17.508	-0.0178288	-0.0174761	0.0290865	0.863466	0.866135	0.842799
403.196	17.5157	-0.225289	0.106763	0.197181	0.653711	0.83079	0.780419
325.127	17.5167	0.29134	-0.0973218	-0.228055	0.169569	0.627644	0.427623
134.063	17.5378	0.383379	0.19338	-0.261733	0.182	0.482046	0.50049
252.095	17.5543	-0.242271	0.139347	-0.0170896	0.348534	0.582567	0.961606
350.009	17.5858	-0.354116	0.677503	-0.442426	0.38252	0.115074	0.437965
178.051	17.5903	0.0393813	0.168703	0.101721	0.85249	0.434514	0.734822
349.004	17.5992	-0.666632	0.673075	-0.149843	0.239262	0.235141	0.844886
940.448	17.62	0.289248	0.163646	-0.20427	0.0617901	0.254393	0.310045
329.159	17.6447	-0.240753	0.0950587	0.159275	0.565843	0.819027	0.786477
198.114	17.6528	-0.265651	0.236213	0.262079	0.265853	0.318525	0.428217
640.208	17.672	-0.553361	-0.0644191	0.367285	0.0407022	0.783772	0.285639
159.103	17.7013	-0.820232	0.257269	0.32486	0.0410981	0.46754	0.515101
160.105	17.7013	-0.193631	0.271781	-0.376405	0.391164	0.238984	0.248007
155.102	17.7165	0.30426	0.300993	-0.349896	0.175442	0.179605	0.261247
331.165	17.7185	-0.155471	0.202802	0.053538	0.562972	0.453927	0.886829
139.108	17.7205	0.321462	0.0436118	-0.337758	0.0438572	0.754071	0.113704
202.117	17.7253	-0.156443	0.11666	0.296633	0.720311	0.78909	0.632328
201.114	17.7333	-0.543792	-0.103744	0.740755	0.296157	0.836488	0.313077
209.096	17.754	-0.310797	-0.138696	0.577635	0.103528	0.436095	0.0422353
200.488	17.7623	0.191966	-0.118587	-0.125765	0.233327	0.448757	0.566848
489.233	17.7667	0.295207	0.055077	-0.249119	0.259986	0.826735	0.49005
527.28	17.7895	0.513314	0.131951	-0.455094	0.12797	0.674054	0.318221
371.171	17.7993	-0.102537	0.0113919	0.0879443	0.734859	0.969874	0.836883
273.134	17.8021	-0.173865	0.310979	-0.0203789	0.68057	0.466846	0.972629
223.085	17.8021	-0.215074	-0.118068	0.462314	0.185136	0.449041	0.0586475
255.112	17.8153	-0.145586	0.130867	0.082238	0.533181	0.574447	0.801354
395.169	17.8342	-0.0208888	0.0476333	0.194111	0.90188	0.779057	0.427328
411.079	17.8453	-0.395304	0.85434	-0.739392	0.398877	0.0902921	0.272429
412.085	17.8541	-0.19809	0.800373	-0.849802	0.521293	0.0266588	0.0763117
437.177	17.8738	-0.00225421	0.153434	0.0740444	0.993326	0.573126	0.846132
335.125	17.8915	-0.0409898	0.0571386	-0.170478	0.650523	0.530274	0.203789
435.174	17.893	0.0618042	0.146628	-0.0244869	0.80858	0.568866	0.945793
312.171	17.8985	-0.0307318	0.0469842	-0.0829954	0.882303	0.8211	0.7778
423.165	17.9035	0.00455735	0.0761851	0.0815975	0.988489	0.809762	0.855218
530.28	17.9237	0.532526	-0.128377	-0.316842	0.31024	0.800571	0.660678
304.208	17.9295	-0.816715	0.0790952	0.0063072	0.00577317	0.727156	0.984241
445.208	17.9324	-0.253192	0.0376402	0.281432	0.552369	0.928804	0.638999
302.272	17.9421	-0.0572081	0.121408	-0.777852	0.922669	0.83696	0.363684
531.27	17.9429	0.478094	-0.0772744	-0.399042	0.157735	0.80747	0.384573
227.125	17.9572	-0.206123	0.460499	-0.234858	0.689974	0.382408	0.747477
425.172	17.9765	-0.197525	-0.122325	0.220227	0.50566	0.677479	0.597761
389.181	17.9793	-0.620245	-0.0480451	0.649655	0.104453	0.890711	0.212066
303.19	17.986	-1.10474	0.0293134	0.409448	0.00410349	0.918644	0.328253
225.113	18.0003	-0.356889	0.14933	0.137343	0.282861	0.642907	0.762077
376.134	18.017	-0.197578	0.135882	0.331281	0.54988	0.679044	0.480417
654.324	18.0204	0.0039413	0.510121	-0.171123	0.99093	0.167523	0.728133
548.266	18.0249	0.603022	0.153411	-0.644138	0.113002	0.662746	0.215742
381.157	18.0757	-0.119434	-0.00310635	0.237364	0.712811	0.992327	0.606513
241.064	18.0903	-0.312101	0.0102011	0.256949	0.452635	0.980047	0.658066
283.154	18.1019	-0.21998	0.0987886	0.155869	0.539717	0.780915	0.756481
299.147	18.1057	-0.189913	0.0738573	0.149633	0.539454	0.809424	0.730242
351.147	18.1109	-0.353819	0.043782	0.342439	0.446372	0.923502	0.598617
459.222	18.1653	-0.217966	0.066653	0.256423	0.611721	0.875697	0.672028
275.007	18.1673	-0.558274	-0.838893	0.230275	0.249052	0.0987344	0.726335
431.198	18.1843	-0.243029	0.133182	-0.0240972	0.660542	0.808985	0.975281
355.033	18.1843	-0.16927	-0.2562	0.00484798	0.57848	0.406332	0.99093
377.132	18.2198	-0.806326	-0.239002	0.593908	0.0386011	0.484671	0.233953
378.141	18.2362	-0.685808	-0.246154	0.487196	0.0242494	0.349023	0.201376
256.094	18.2398	-0.23212	-0.143315	0.306159	0.08571	0.260852	0.105018
315.015	18.257	0.0126488	-0.103633	-0.0137348	0.949545	0.607238	0.961247
236.096	18.2708	-0.499223	-0.206521	0.912746	0.103043	0.468388	0.044628
183.103	18.2926	-0.258086	0.0258619	0.288988	0.180516	0.886756	0.278864
295.122	18.3167	-0.435049	-0.0347474	0.337509	0.358406	0.93988	0.607516
683.395	18.3278	-0.611068	-0.119655	0.534768	0.0817596	0.706937	0.253104
296.124	18.3323	-0.217261	-0.256571	0.0968029	0.40011	0.324632	0.786593
188.073	18.3476	-1.01361	-0.372767	0.886527	0.00416338	0.183167	0.0399051
234.081	18.362	-0.547736	-0.2986	0.324415	0.0011515	0.0276322	0.0728913
294.067	18.3763	-0.519924	-0.1298	0.351366	0.23436	0.756368	0.555885
243.16	18.4172	-0.235738	0.0437021	0.13293	0.534373	0.907166	0.80227
244.162	18.4407	0.0952915	0.0170805	-0.204573	0.676638	0.940079	0.529685
416.202	18.4522	-0.314072	0.249877	0.00709822	0.141442	0.230463	0.979838
419.19	18.4633	-0.0470228	0.0573177	0.150064	0.923174	0.906438	0.827938
149.061	18.4638	-0.357963	-0.47594	0.215594	0.279191	0.161318	0.634344
245.175	18.4638	-0.174766	0.0274173	0.112726	0.513825	0.917295	0.763335
189.081	18.4702	-0.489385	-0.2714	0.354542	0.00203754	0.0376259	0.0505942
415.197	18.4905	-0.320284	0.420908	-0.0299526	0.41592	0.29225	0.956152
510.259	18.5102	0.402009	-0.400074	-0.511477	0.453142	0.45524	0.498248
207.067	18.5268	-0.28298	-0.0664095	0.0673414	0.168727	0.731711	0.805454
429.195	18.5387	-1.16163	0.333546	-0.379241	0.0311751	0.475211	0.563648
430.199	18.5387	-0.999069	0.357941	-0.461999	0.0156314	0.305145	0.346636
427.183	18.5393	-1.20666	-1.11492	0.81645	0.0566515	0.0737328	0.317962
428.186	18.5478	-1.04845	-1.07157	0.554916	0.0492592	0.0454854	0.411395
517.277	18.5675	0.435349	-0.55561	-0.323719	0.501435	0.395199	0.72089
259.154	18.6278	-0.334216	0.0106369	0.299643	0.516895	0.983313	0.678665
271.155	18.663	-0.418291	-0.000945396	0.286356	0.380094	0.998376	0.664877
167.1	18.6692	0.0289855	-0.0114339	-0.0476307	0.768306	0.907266	0.732379
518.278	18.6836	0.479838	-0.656508	-0.333392	0.497883	0.359803	0.736231
514.284	18.6907	0.0961889	-1.02052	0.410035	0.860068	0.0895108	0.598147
515.286	18.6907	0.275874	-0.960237	0.154855	0.666009	0.157498	0.863273
516.284	18.6907	0.341526	-0.95732	0.0731951	0.613919	0.17945	0.938558
582.271	18.7073	-0.342263	-0.711909	0.834408	0.263155	0.0367438	0.0716911
512.663	18.7202	0.528351	-1.10899	-0.0950759	0.527962	0.203526	0.935163
212.116	18.7227	-0.192961	-0.266747	0.222164	0.036531	0.00849394	0.0755393
281.176	18.7257	-0.175198	-0.242521	0.36929	0.232799	0.111765	0.0905537
211.112	18.7325	-0.537298	-0.144981	0.5459	0.0945486	0.622747	0.210267
513.661	18.7455	0.634033	-1.15951	-0.179186	0.486724	0.219117	0.887759
233.083	18.7797	0.0486818	-0.0815787	-0.0916595	0.809897	0.687873	0.749118
263.039	18.8769	-0.631327	-0.438744	0.307296	0.15717	0.309635	0.605723
262.05	18.8887	-0.496872	-0.458939	-0.166018	0.0711835	0.0910267	0.636421
200.127	18.8887	-0.215981	0.10122	0.616067	0.32476	0.636142	0.0672288
290.142	18.8936	-0.0465967	-0.124412	-0.00278844	0.817487	0.542047	0.992195
261.044	18.895	-0.9579	-0.461324	0.21185	0.107701	0.408488	0.784187
785.466	18.896	0.18517	0.00346119	-0.305077	0.706425	0.994356	0.661324
797.49	18.964	-0.0835701	-0.00750516	0.139479	0.859391	0.987294	0.834463
614.33	18.9788	-0.35073	0.27849	0.440415	0.63431	0.704889	0.672283
615.333	18.9788	-0.0594539	0.251271	0.122757	0.913214	0.647227	0.873631
604.302	18.9922	-0.360098	0.268951	0.4177	0.577489	0.676001	0.646649
229.166	18.9938	-0.178908	-0.227144	0.370232	0.082291	0.0357336	0.0197105
825.893	19.0003	0.150429	0.19768	0.72228	0.320251	0.201259	0.00700628
612.387	19.0004	-0.133042	-0.133766	0.492116	0.79259	0.791491	0.497197
228.16	19.0007	-0.405472	-0.160199	0.578595	0.096582	0.478367	0.0940914
616.334	19.0073	0.0646557	0.185505	-0.0623609	0.88233	0.672668	0.919561
254.177	19.1061	-0.151725	-0.240171	0.295003	0.195183	0.0556268	0.0878673
193.089	19.1379	-0.731718	-0.623479	0.976463	0.0392968	0.0693234	0.0487941
159.103	19.2993	-0.352502	-0.182274	0.186144	0.142055	0.424185	0.559983
512.268	19.3557	0.372371	-0.273422	0.448242	0.446555	0.572904	0.514888
321.137	19.4088	-0.382832	-0.199035	0.285668	0.322299	0.598365	0.59303
185.118	19.4103	-0.0596648	-0.222716	0.195513	0.610925	0.0835659	0.254856
326.117	19.4105	-0.0926431	0.0522737	-0.0750475	0.519356	0.713651	0.709541
574.278	19.4446	-0.058535	0.177864	0.113167	0.831897	0.5239	0.771959
513.269	19.4451	0.344732	-0.229126	0.290932	0.415325	0.583713	0.622066
215.129	19.4697	-0.339977	-0.0874933	0.281654	0.372499	0.814044	0.595134
216.132	19.4697	-0.075621	-0.0769924	-0.0384272	0.754376	0.750097	0.910238
361.199	19.4993	-0.239879	0.684684	-0.366947	0.432736	0.0461243	0.397681
274.173	19.4993	0.0316611	0.0248255	-0.107766	0.916439	0.934424	0.800974
710.462	19.5048	-0.146855	-0.529603	0.354624	0.662926	0.141355	0.461943
362.185	19.5232	-0.310415	0.647183	-0.401398	0.310173	0.0538136	0.350857
273.169	19.5328	-0.146388	0.00459563	0.0805899	0.689762	0.989949	0.875966
309.136	19.5806	-0.348187	-0.0681789	0.25981	0.417435	0.8712	0.663889
423.037	19.5978	-0.311939	-0.219664	-0.0220931	0.32606	0.482347	0.9595
449.272	19.6292	-0.0967617	0.0305101	0.250194	0.797849	0.935507	0.641242
347.017	19.6367	-0.904624	-0.464128	0.449039	0.020892	0.179372	0.34357
278.916	19.6673	-0.168066	0.226929	-0.467856	0.282752	0.158582	0.0531588
353.16	19.6918	-0.168939	0.00165034	0.147001	0.640525	0.996334	0.77289
473.237	19.7128	-0.0162368	0.0441379	-0.035834	0.965332	0.905985	0.945928
450.274	19.753	0.0631013	0.0334452	0.407646	0.712314	0.844551	0.119027
225.112	19.7652	-0.539091	-0.154552	0.266767	0.164429	0.672435	0.606847
291.161	19.8164	-0.00362646	-0.0734169	0.0202778	0.965923	0.398252	0.865976
481.209	19.8567	0.232579	-0.00558809	-0.118808	0.322081	0.980391	0.712971
365.163	19.8613	-0.270268	0.0414016	0.284835	0.295497	0.86812	0.42842
117.071	19.8722	-0.917003	-0.14838	-0.523042	0.124035	0.788014	0.50787
343.176	19.8783	-0.150352	-0.0769787	0.0819688	0.666689	0.824699	0.86745
612.32	19.8796	0.0899103	0.265427	-0.20672	0.862292	0.611294	0.778294
417.213	19.8846	-0.580079	-0.238989	0.755118	0.105872	0.474279	0.131981
613.319	19.8863	0.197334	0.309919	-0.292721	0.626812	0.450123	0.610328
351.147	19.8892	-0.123932	0.0890792	-0.0414132	0.793623	0.850687	0.950606
367.177	19.8964	-0.0796384	0.0534037	-0.115313	0.777775	0.849683	0.772645
241.142	19.8972	-0.0544857	0.142587	-0.0254942	0.84939	0.621617	0.94985
602.296	19.9152	0.120874	0.31272	-0.264197	0.707579	0.343939	0.564551
227.129	19.9393	-0.0248159	0.0411528	0.10162	0.883754	0.808649	0.673613
294.065	19.9507	-0.420243	-0.0926527	0.324562	0.372409	0.840194	0.619824
293.116	19.9559	-0.368025	0.20623	0.0938337	0.0623606	0.259778	0.706562
270.173	19.9787	-0.0681955	-0.0106998	0.10228	0.371612	0.885622	0.344886
379.143	19.9854	-0.20929	0.00427215	0.393639	0.618161	0.991815	0.509986
157.087	19.9898	0.0337227	0.227606	0.00415714	0.84842	0.219406	0.986691
158.09	20.0083	0.0840437	0.130217	-0.0564085	0.577111	0.394151	0.789666
183.103	20.0102	-0.262324	-0.0407013	0.273099	0.245477	0.850662	0.38318
639.332	20.0173	0.221589	0.596065	-0.305586	0.496162	0.0914361	0.506616
503.261	20.0255	0.076149	0.16646	-0.303742	0.796868	0.57675	0.474376
638.332	20.04	-0.305241	0.194115	0.264498	0.463039	0.637211	0.64938
181.093	20.1047	0.131109	0.108294	-0.272148	0.46309	0.542225	0.290793
394.266	20.1119	-0.0677165	0.652803	-0.268819	0.734123	0.00948876	0.352395
393.263	20.1258	0.162385	0.699191	-0.44726	0.598228	0.0457942	0.316465
197.124	20.1358	-0.0185176	0.204344	-0.0341432	0.916661	0.267524	0.89151
223.121	20.144	-0.148861	0.110627	0.0648231	0.545438	0.651466	0.850711
415.199	20.1683	-0.192277	0.169006	-0.307976	0.458749	0.513196	0.403712
416.201	20.1692	-0.0837068	0.156785	-0.451624	0.551423	0.277767	0.0451106
285.17	20.185	-0.145298	0.0535963	0.0558105	0.700086	0.886534	0.916297
286.174	20.1997	-0.0583383	-0.0142458	-0.0543353	0.801349	0.950913	0.868238
335.153	20.2572	-0.116517	0.0502913	0.0493971	0.651802	0.844737	0.891738
277.111	20.2825	-1.23696	-0.0262628	0.332262	0.00652422	0.940185	0.508124
282.174	20.2832	-0.0418272	0.188678	-0.0730276	0.755791	0.184569	0.701476
567.294	20.2875	-0.0227812	-0.569502	0.110737	0.950569	0.14849	0.831494
525.275	20.3175	-0.00750638	-0.278243	0.433708	0.980058	0.367108	0.322845
524.276	20.3338	-0.203137	-0.464484	0.703778	0.648542	0.310547	0.279548
663.334	20.3419	0.00568036	0.333595	0.0591324	0.977189	0.121432	0.833532
274.041	20.347	0.174918	-0.0771352	-0.264055	0.416737	0.715539	0.387405
496.271	20.3634	0.861436	-0.131155	-0.256773	0.226259	0.84678	0.789318
429.18	20.3748	-0.785634	-0.343574	0.182328	0.049206	0.340738	0.71376
430.184	20.3748	-0.593152	-0.297408	-0.0333263	0.0375561	0.24725	0.923649
263.053	20.376	-0.889647	-0.543843	0.34139	0.0218813	0.12099	0.463398
388.031	20.3768	0.0268341	-0.120299	-0.0797173	0.910256	0.616124	0.813092
278.13	20.3975	-0.703873	-0.0250355	0.315966	0.00673353	0.900592	0.283109
662.331	20.413	-0.0122064	0.452346	-0.0654818	0.960504	0.0949259	0.851154
337.139	20.4543	-0.365378	-0.0984318	-0.0443976	0.128454	0.660017	0.887788
544.299	20.4743	0.333716	-0.221299	-0.462266	0.462354	0.622558	0.471273
287.185	20.4854	-0.12869	0.00360588	0.0852753	0.629786	0.989141	0.820262
281.175	20.4867	0.0182161	0.176378	-0.0614351	0.932817	0.424092	0.84084
241.417	20.511	-0.149423	-0.05391	0.284388	0.228306	0.650432	0.117207
242.176	20.511	-0.47319	-0.0805118	0.667121	0.184874	0.811235	0.186091
330.231	20.515	0.102472	0.0207303	-0.158607	0.694594	0.936383	0.667712
329.23	20.5233	-0.0056281	0.0736395	-0.028648	0.9838	0.790955	0.941748
310.159	20.5281	-0.220172	-0.0119914	0.555519	0.305587	0.953928	0.0866267
738.502	20.5282	-0.12479	0.0764927	0.0398242	0.732522	0.833668	0.9383
287.613	20.5294	0.0689321	-0.853043	0.366019	0.920422	0.237798	0.708777
627.38	20.5295	-0.604866	-0.299676	0.759081	0.0409291	0.262258	0.062776
328.133	20.5342	-0.214437	0.257108	0.00726434	0.164969	0.104257	0.971694
542.379	20.535	0.16262	0.0364949	-0.217379	0.316846	0.81667	0.342459
560.38	20.5365	-0.0433346	0.156488	-0.115109	0.801536	0.375506	0.638585
659.474	20.5366	0.189004	0.0783913	-0.579482	0.644364	0.847296	0.328876
297.15	20.545	-0.551711	-0.474012	1.11814	0.12399	0.178015	0.0391335
229.144	20.5501	-0.283883	-0.0174812	0.110207	0.229202	0.938074	0.730061
598.378	20.5507	0.261507	0.192016	-0.361156	0.236124	0.374491	0.246337
230.147	20.554	-0.152312	0.0028783	-0.0640089	0.442071	0.988181	0.816131
344.979	20.5572	-0.387544	-0.0639093	0.503938	0.0992521	0.766344	0.124819
459.259	20.5583	0.130621	0.0680536	-0.236093	0.621846	0.796039	0.530486
644.386	20.5676	-0.100488	-0.0809285	0.114137	0.548502	0.627526	0.628455
556.376	20.5698	0.0996881	0.178419	-0.149861	0.538624	0.283503	0.514018
573.393	20.5763	0.1864	0.089001	-0.251962	0.321946	0.627804	0.342496
487.236	20.5768	0.241446	-0.224452	-0.232461	0.502514	0.532249	0.645437
559.379	20.5788	0.077521	0.14021	-0.327185	0.50251	0.239802	0.069427
628.388	20.588	-0.210173	-0.149359	0.159519	0.141247	0.279482	0.406529
363.184	20.5993	0.0462966	0.423558	-0.470048	0.775737	0.0272417	0.0672828
296.617	20.601	0.118949	-0.760287	1.34578	0.899616	0.429408	0.328013
640.344	20.6165	0.116968	0.384676	-0.124401	0.579162	0.0938378	0.67528
438.122	20.6232	-0.356583	0.0836972	0.440413	0.388371	0.835833	0.448686
226.142	20.665	0.315929	0.394206	0.120855	0.0309529	0.0115056	0.499644
170.09	20.7127	0.470116	0.544529	-0.432584	0.0703679	0.0420394	0.211588
500.288	20.7307	0.712292	-0.720757	-0.521812	0.374213	0.368849	0.638991
125.091	20.7337	0.588649	0.517628	-0.595165	0.0491713	0.0760039	0.136254
169.087	20.7345	0.334313	0.536656	-0.254254	0.254883	0.0844953	0.528051
432.229	20.7419	-0.464873	-0.239926	0.769008	0.0420086	0.247412	0.0222224
431.227	20.7432	-0.58746	-0.241623	0.905602	0.0437255	0.35403	0.0312618
496.725	20.7443	0.358165	-0.870266	-0.208914	0.614205	0.238351	0.834171
444.165	20.7509	-0.323557	0.235742	-0.343788	0.297194	0.440047	0.426476
499.29	20.7581	0.64376	-0.710196	-0.434253	0.395202	0.350652	0.679572
498.288	20.7581	0.634896	-0.7771	-0.37892	0.408584	0.316946	0.722402
443.165	20.7608	-0.269189	0.290695	-0.436688	0.37644	0.341489	0.314057
938.512	20.7795	0.37376	-0.114059	-0.595027	0.18975	0.673452	0.145372
365.032	20.827	-0.74893	-0.408345	0.425339	0.041397	0.222309	0.358284
269.13	20.8505	-0.17671	-0.0274523	0.160726	0.401281	0.893881	0.584286
484.271	20.8605	0.240168	-0.77991	0.0574799	0.660746	0.17722	0.940427
550.276	20.8723	0.449901	0.233912	-0.358282	0.0516259	0.268802	0.234086
288.619	20.878	0.00284994	-1.08876	0.631888	0.996988	0.175104	0.558407
289.62	20.8805	0.220994	-0.953562	0.462346	0.818295	0.335596	0.734483
421.119	20.908	-0.502608	-0.318855	0.640379	0.0808868	0.24082	0.109688
582.274	20.9082	0.1308	-0.600996	0.297814	0.609371	0.0403697	0.416875
322.621	20.9208	-0.281927	-1.1193	0.929618	0.728654	0.191541	0.426468
514.659	20.9345	0.699256	-0.818319	-0.486881	0.263588	0.197032	0.570201
518.276	20.9345	0.46433	-0.489966	-0.324875	0.347899	0.323454	0.635043
214.149	20.9345	-0.0278153	0.209588	-0.0927912	0.887165	0.301797	0.738603
517.281	20.9345	0.477209	-0.758574	-0.19946	0.363929	0.164501	0.78325
514.283	20.9345	0.273192	-1.14008	0.2982	0.586973	0.0458394	0.673813
515.286	20.9345	0.343145	-1.06912	0.162956	0.503487	0.0606306	0.819947
516.284	20.9345	0.42279	-1.08253	0.0681015	0.441957	0.0720988	0.928857
512.662	20.9345	0.638713	-1.10978	-0.230244	0.344041	0.11872	0.804163
513.662	20.9345	0.653052	-1.13689	-0.176276	0.350747	0.122796	0.854699
213.148	20.9622	0.159125	0.0892523	-0.241298	0.553077	0.737369	0.52547
599.378	20.9897	0.180669	0.0493259	-0.441726	0.108059	0.634661	0.0140698
209.115	20.9907	-0.220846	0.0843022	-0.131902	0.361036	0.721129	0.693177
631.384	21.031	-0.213896	0.292861	-0.21833	0.326113	0.189973	0.471888
922.545	21.0567	0.495207	-0.185447	-0.586432	0.163814	0.581687	0.23518
221.082	21.058	0.0467299	-0.101943	0.218491	0.800702	0.584757	0.413346
222.086	21.0687	0.133406	-0.140309	0.0415247	0.482937	0.461335	0.875383
629.374	21.0708	0.00850846	0.16672	-0.242513	0.957997	0.31806	0.305308
922.568	21.0755	0.635551	-0.275806	-0.745711	0.195508	0.55692	0.274957
297.036	21.1035	0.105914	-0.0848525	0.000951473	0.69644	0.754197	0.998013
217.161	21.1038	-0.00493349	0.0566377	-0.407508	0.983849	0.816541	0.257264
299.184	21.1038	0.100903	0.112433	-0.211429	0.744688	0.716934	0.630859
331.19	21.124	-0.227989	0.115992	-0.742246	0.20028	0.497783	0.012362
308.161	21.1258	-0.0280745	-0.144333	-0.0791955	0.861772	0.382303	0.729126
464.295	21.1261	1.25211	-0.167107	-0.889324	0.0825067	0.797846	0.34817
307.158	21.1265	-0.301169	-0.105087	0.22953	0.349953	0.738002	0.607233
255.159	21.1288	-0.1264	0.0321237	-0.062034	0.415012	0.832536	0.773064
393.193	21.1402	-0.0206884	-0.0429126	-0.134773	0.914028	0.82303	0.62165
708.474	21.1557	0.438144	0.274957	-0.554365	0.180522	0.384135	0.225725
707.471	21.159	0.133594	0.275079	-0.498651	0.591388	0.282871	0.178266
332.18	21.1925	-0.248319	0.137191	-0.72452	0.2201	0.483358	0.0252723
335.069	21.2145	-0.789458	-0.4838	0.664219	0.0128644	0.0865927	0.0945551
408.282	21.2458	0.478273	0.308297	-0.609798	0.390982	0.574954	0.437266
243.166	21.2656	-0.11743	-0.125315	0.452855	0.759532	0.74404	0.412861
407.279	21.2757	0.19196	0.336671	-0.323719	0.70723	0.514057	0.65488
244.168	21.2824	0.0744697	-0.0527047	0.179571	0.767528	0.834048	0.616149
578.304	21.2925	0.0434656	-0.260289	0.307839	0.902186	0.469254	0.542982
215.165	21.305	-0.0180843	-0.0168905	0.0490472	0.756465	0.771991	0.555307
216.169	21.3073	0.0834619	0.0498302	-0.116738	0.447951	0.646535	0.452767
476.276	21.338	-0.196636	0.0172919	0.356383	0.335789	0.93046	0.225803
423.273	21.3457	0.066118	0.518211	-0.635863	0.804974	0.080451	0.120823
377.268	21.355	0.215672	0.551832	-0.746515	0.405747	0.0549544	0.0639796
378.275	21.3552	0.13713	0.393453	-0.632315	0.439835	0.0479991	0.0292449
373.094	21.3624	-0.00960902	0.0296405	-0.130896	0.976759	0.928412	0.779554
453.284	21.3813	0.00510037	0.274771	-0.136156	0.990589	0.530494	0.824084
477.272	21.3834	0.000618907	-0.0110982	0.0615603	0.997456	0.954412	0.822852
424.277	21.3845	0.159768	0.452695	-0.644354	0.495801	0.0778453	0.0762798
186.121	21.3885	-0.132784	0.0401917	-0.127519	0.41321	0.800503	0.573966
454.287	21.3928	0.12944	0.268471	-0.322364	0.774481	0.555803	0.615847
185.118	21.4038	-0.344659	-0.0104459	0.196785	0.123418	0.959663	0.506668
256.175	21.4356	-0.0763752	-0.0151293	-0.122302	0.262711	0.817369	0.209643
508.28	21.4609	0.746038	0.213981	-0.752458	0.0424238	0.508753	0.123802
455.267	21.4652	0.141339	0.16552	-0.335668	0.47955	0.410448	0.248248
296.179	21.4698	-0.207477	0.298712	0.0183547	0.266165	0.12355	0.942228
319.131	21.5108	-0.153015	0.0592761	0.179192	0.210751	0.612454	0.29256
294.983	21.5315	-0.0502255	-0.0433171	0.1888	0.655195	0.699662	0.252709
254.148	21.5465	-0.162113	-0.128912	-0.212762	0.245931	0.348602	0.278767
509.273	21.5592	0.49342	0.034327	-0.495797	0.141778	0.912516	0.280249
478.291	21.5902	0.0253691	0.0379794	0.368973	0.953826	0.930932	0.556012
408.978	21.5902	-0.472359	-0.0632806	0.579231	0.11412	0.818196	0.162712
253.144	21.5987	-0.375944	-0.198454	0.0324851	0.0426227	0.239342	0.886657
337.168	21.6172	0.0150614	-0.090269	-0.122238	0.931492	0.609387	0.624421
338.17	21.6216	0.110539	-0.0626074	-0.174206	0.610226	0.771515	0.570781
301.198	21.6322	-0.0725252	-0.0172098	0.0568153	0.73449	0.935626	0.850589
245.158	21.6337	-0.0385972	0.0800993	0.136323	0.824215	0.646571	0.582228
539.312	21.6507	0.489237	0.131733	-0.498254	0.0201257	0.458507	0.070794
507.274	21.6509	0.313925	0.0855905	-0.61128	0.270761	0.755306	0.141983
210.159	21.6517	0.224601	0.0868789	-0.459989	0.346603	0.708986	0.185607
538.314	21.6522	0.544996	0.488932	-0.526635	0.110612	0.146242	0.2552
229.18	21.6954	0.0182867	-0.0106841	-0.00349143	0.818199	0.893046	0.975201
290.187	21.7094	-0.0098014	0.158222	-0.0244477	0.962887	0.460648	0.934603
586.314	21.7167	-0.0386998	0.173159	-0.170825	0.895654	0.561463	0.683742
295.155	21.7397	-0.179138	-0.0517098	0.0989075	0.314829	0.76481	0.686468
563.277	21.7399	0.370705	-0.479951	-0.228112	0.469333	0.354242	0.749529
227.165	21.7521	0.0387165	-0.0802177	-0.143025	0.831234	0.660356	0.580976
501.273	21.7774	0.656545	0.331175	-0.649442	0.217892	0.518963	0.376956
386.259	21.78	-0.0175053	0.0545069	-0.229516	0.955126	0.861036	0.60504
280.163	21.7852	0.0265687	0.274631	-0.367096	0.880297	0.146699	0.167246
404.121	21.7873	0.0883883	0.122685	0.011051	0.729106	0.631967	0.975479
403.116	21.8007	-0.106618	0.0773616	0.295892	0.73595	0.806363	0.51253
315.202	21.8033	-0.248812	-0.0571015	0.195625	0.233471	0.774927	0.494046
286.205	21.8044	0.020478	-0.0349096	-0.0144071	0.866737	0.775215	0.933424
257.176	21.805	-0.0919377	-0.0613022	-0.0931623	0.697363	0.794853	0.780001
270.18	21.8093	-0.203494	0.238608	-0.239148	0.141236	0.0919486	0.211968
496.273	21.8111	0.743271	-0.115765	-0.964017	0.447015	0.903958	0.484277
258.177	21.8122	0.176408	0.0748521	-0.402757	0.351562	0.685744	0.148961
452.276	21.8353	0.442568	0.735283	-0.649638	0.245317	0.07078	0.229358
285.207	21.8353	-0.092263	0.0286445	0.100488	0.573045	0.859797	0.662932
457.275	21.8571	0.212575	0.0301573	-0.32398	0.44402	0.911878	0.41085
394.976	21.8577	-0.380769	-0.0255894	0.486977	0.136384	0.914145	0.172694
279.16	21.875	0.103687	0.298388	-0.301157	0.71394	0.306156	0.457771
279.132	21.8881	-0.470514	0.0621911	-0.153186	0.0563281	0.77572	0.621615
361.257	21.9023	0.177134	0.089251	-0.15181	0.241287	0.541511	0.465146
451.269	21.9067	0.455875	0.698263	-0.345934	0.351539	0.168201	0.609986
413.254	21.914	0.0544518	0.0786041	-0.204346	0.884429	0.833924	0.700891
251.165	21.947	0.376333	0.255135	-0.816289	0.108761	0.255942	0.0243701
500.277	21.9786	0.790611	-0.121707	-0.513875	0.30817	0.871112	0.630422
323.151	22.0092	-0.519342	0.0947723	0.0625364	0.0737651	0.717212	0.865352
324.154	22.021	-0.391964	0.0943083	-0.108791	0.105943	0.672723	0.729916
345.262	22.0346	0.168072	0.139829	-0.813176	0.653	0.707803	0.148831
309.171	22.0397	-0.050835	0.151048	-0.0337003	0.730779	0.320568	0.871472
346.17	22.0404	1.38652	0.53443	-0.799805	0.00413781	0.164798	0.144326
235.17	22.0892	0.0917321	0.215625	-0.517256	0.711157	0.393374	0.164517
310.174	22.1078	0.191806	0.144577	-0.408117	0.425809	0.54475	0.242371
294.178	22.1328	-0.039465	0.062293	-0.0279324	0.799578	0.689525	0.898728
240.161	22.1577	-0.0225551	0.635617	-0.43061	0.890483	0.00391889	0.0912753
293.175	22.1628	-0.0188485	0.123575	-0.0943648	0.877211	0.326193	0.587739
267.16	22.1843	0.396818	0.206983	-0.389915	5.52805e-05	0.00374645	0.00066264
427.267	22.1861	0.0575053	0.119525	-0.260065	0.84869	0.692845	0.546145
385.256	22.2001	0.268329	0.139254	-0.821486	0.497519	0.72186	0.16253
415.257	22.2607	-0.0322163	0.0900675	-0.0331977	0.814173	0.5162	0.8639
332.254	22.268	0.0719996	-0.135232	-0.212231	0.816362	0.664112	0.630371
399.273	22.2757	0.0369248	0.0114832	-0.323202	0.893908	0.966901	0.418965
422.261	22.3362	-0.165922	-0.0981046	0.149981	0.33917	0.564482	0.534104
421.256	22.3403	-0.427197	-0.129908	0.416364	0.16635	0.655683	0.324675
283.191	22.3457	0.186737	0.101799	-0.425891	0.388991	0.632861	0.180042
420.249	22.3578	-0.328156	-0.207784	0.396617	0.134904	0.323134	0.193056
374.241	22.3633	-0.251961	-0.19025	0.280948	0.165517	0.282479	0.263291
939.576	22.3698	0.652111	-0.0875567	-0.679622	0.251481	0.8723	0.388954
940.585	22.3928	0.841134	0.00059189	-0.58139	0.202473	0.999244	0.51657
554.304	22.4078	0.861913	0.362041	-0.933204	0.10279	0.461435	0.196232
239.165	22.4126	-0.285519	-0.0710786	-0.793713	0.38309	0.824066	0.107238
398.261	22.4199	0.14007	0.0983022	-0.358945	0.545481	0.669484	0.285749
397.258	22.4418	0.0804025	0.0955815	-0.190493	0.771759	0.730511	0.628692
564.33	22.4572	0.112767	0.450098	0.00738359	0.836763	0.420248	0.992378
322.153	22.4625	0.00558072	0.159723	-0.0232473	0.969349	0.289389	0.90992
321.149	22.467	-0.309699	0.0198764	0.376634	0.100449	0.908088	0.149026
565.333	22.4684	0.350525	0.53843	-0.287969	0.450579	0.257813	0.657249
241.18	22.4812	-0.148762	0.0372784	-0.285938	0.015984	0.467583	0.00327037
504.308	22.529	0.464334	0.243115	-0.351536	0.131264	0.404442	0.394447
224.168	22.5596	0.401847	0.298038	-0.520291	0.165602	0.290601	0.200005
305.142	22.5728	-0.627002	-0.0820588	-0.199811	0.0212729	0.718255	0.537827
351.183	22.6057	0.130139	-0.0728051	-0.183785	0.625366	0.783603	0.625845
411.272	22.6393	0.0947836	0.114067	-0.160578	0.682322	0.623167	0.624733
194.082	22.6768	-0.0680479	0.0626087	-0.0932833	0.598864	0.627919	0.609924
249.152	22.7227	-0.369653	-0.311267	0.41454	0.199406	0.272679	0.299547
444.974	22.7909	0.109484	-0.02244	-0.160876	0.403537	0.861052	0.38628
371.261	22.877	0.151824	0.323479	-0.209202	0.453606	0.131833	0.46487
256.199	22.9581	0.532195	0.503772	-1.02596	0.17729	0.19896	0.0784616
368.254	22.9672	0.405449	0.284908	-0.986488	0.149745	0.295348	0.0253985
193.16	22.9688	0.722615	0.706309	-1.04268	0.0828485	0.0887778	0.0778427
255.196	22.9702	0.511724	0.51293	-0.876299	0.211053	0.210083	0.13833
398.937	22.9731	0.103244	-0.252632	-0.660402	0.819037	0.578817	0.31609
370.262	22.9868	0.153477	0.177641	-0.406511	0.431701	0.365967	0.159577
369.257	23.0103	0.0714109	0.149055	-0.238987	0.759828	0.527593	0.475506
701.472	23.0715	-0.33272	-0.026321	0.400254	0.268131	0.927309	0.34102
381.263	23.1019	0.37621	0.259032	-0.544751	0.21544	0.381422	0.205708
339.253	23.1204	0.554442	0.540459	-1.29526	0.185135	0.195269	0.0435094
476.277	23.1302	0.075858	-0.0291434	0.400823	0.856195	0.944444	0.5042
342.138	23.136	0.543192	0.564918	-0.76028	0.395248	0.377514	0.39991
412.966	23.173	-0.561404	-0.119519	0.328206	0.0508401	0.638197	0.370472
269.211	23.3847	0.39475	0.153729	-0.629415	0.194702	0.596568	0.149219
327.253	23.4158	0.184242	0.0858687	-0.557513	0.493162	0.746491	0.162995
328.256	23.4309	0.625223	0.391592	-1.00541	0.167186	0.369191	0.122345
350.208	23.5323	0.39766	-0.15746	-0.638813	0.453134	0.762856	0.396577
499.292	23.5654	0.0809143	-0.588627	-0.453487	0.932895	0.544961	0.739464
498.288	23.5654	-0.032227	-0.672349	-0.323421	0.973408	0.493488	0.813337
349.204	23.5668	0.279777	-0.197293	-0.42763	0.507494	0.637829	0.474861
494.969	23.5854	0.414078	0.0213287	-0.426248	0.212596	0.946091	0.353055
353.268	23.6188	0.317839	0.0319472	-0.59199	0.349028	0.922822	0.22656
315.252	23.6535	-0.0413696	0.179938	0.0531502	0.746136	0.183027	0.768542
316.255	23.6689	0.328925	0.340988	-0.298892	0.253132	0.237556	0.45162
383.279	23.9553	-0.163293	-0.563057	0.14303	0.751829	0.291759	0.844409
462.962	24.0453	0.16986	-0.339532	0.282478	0.650768	0.374793	0.595432
233.154	24.1294	0.425761	0.314962	-0.59871	0.0561052	0.137285	0.0572216
498.929	24.2021	-0.104732	-0.00137229	0.414633	0.79326	0.997254	0.469839
499.933	24.2125	0.118083	0.452162	0.11209	0.824862	0.406758	0.881814
